# Supplementary material for: Computational Insight into the Rope-Skipping Isomerization of Diarylether Cyclophanes
Source: MDPI journal article supplement (doi:10.3390/sym13112127), 2021-11-09
Supplement: s1 [file s1]

Supporting Information for

**Computational Insight into the Rope-skipping  
Isomerization of Diarylether Cyclophanes**

Thomas J. Summers<sup>1</sup>, Hrishikesh Tupkar<sup>1</sup>, Tyler M. Ozvat<sup>2</sup>, Zoë Tregillus<sup>2</sup>, Kenneth A. Miller<sup>2</sup>,  
and Nathan J. DeYonker<sup>1,\*</sup>

<sup>1</sup>The Department of Chemistry, The University of Memphis, 213 Smith Chemistry Building,  
Memphis, Tennessee 38152-3550, United States

<sup>2</sup>Department of Chemistry, Fort Lewis College, Durango, Colorado 81301, United States

\*ndyonker@memphis.edu

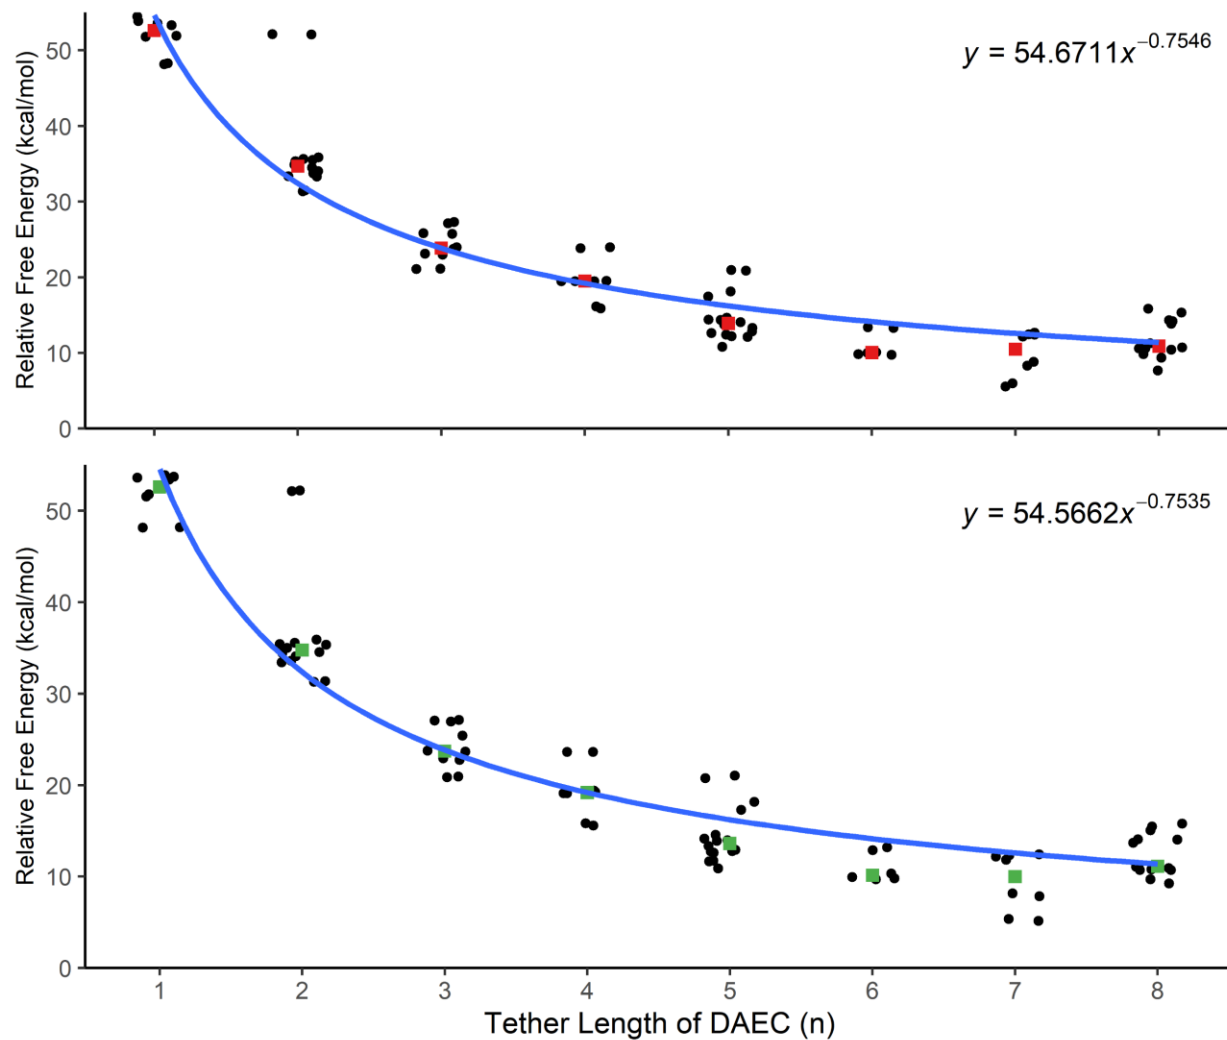

**Figure S1.** Plots of relative activation energies for isomerization between enantiomeric conformations of DAEC of varying tether lengths ( $6 + n$  carbons) within an implicit solvent of benzene (top) and dimethylformamide (bottom). Color squares are used to indicate the median activation energies for each sample of molecule conformations. Blue lines are used to indicate a power law equation fit to the data by minimizing residual sum of squares.

## Cartesian Coordinates of Optimized Stationary Points

### daec[n=1]-1-TS (benzene)

|   |           |           |           |
|---|-----------|-----------|-----------|
| C | -3.010512 | -0.036532 | 0.071993  |
| H | -4.089684 | -0.016988 | 0.200411  |
| C | -2.268187 | 1.165077  | 0.150896  |
| C | -0.912108 | 1.034093  | -0.028781 |
| H | -0.284237 | 1.888556  | -0.023644 |
| C | -0.286293 | -0.171221 | -0.187259 |
| H | 0.778064  | -0.132785 | -0.210930 |
| C | -0.970674 | -1.360935 | -0.297366 |
| O | -0.276565 | -2.560880 | -0.517214 |
| C | -2.384153 | -1.287946 | -0.174977 |
| O | -3.052695 | -2.470885 | -0.290770 |
| C | -4.466135 | -2.464165 | -0.172346 |
| H | -4.936619 | -1.839869 | -0.946385 |
| H | -4.790930 | -2.117111 | -0.819877 |
| H | -4.781387 | -3.503070 | -0.308775 |
| C | 3.470480  | -1.481347 | 0.873486  |
| H | 4.345888  | -1.048563 | 1.355300  |
| C | 3.018482  | -0.949661 | -0.345446 |
| C | 3.581018  | 0.366159  | -0.893065 |
| H | 3.987501  | 0.195811  | -1.901552 |
| H | 4.434589  | 0.665487  | -0.269338 |
| C | 2.594564  | 1.584629  | -1.035500 |
| H | 1.744877  | 1.271045  | -1.658184 |
| H | 3.130369  | 2.331563  | -1.640464 |
| C | 1.906555  | -1.567840 | -0.948258 |
| H | 1.526735  | -1.190426 | -1.895397 |
| C | 1.088715  | -2.430222 | -0.198573 |
| C | 1.549438  | -2.960748 | 1.005318  |
| H | 0.917770  | -3.641095 | 1.571197  |
| C | 2.783710  | -2.526111 | 1.501582  |
| H | 3.159702  | -2.934238 | 2.437812  |
| C | 2.039570  | 2.312130  | 0.226718  |
| H | 2.880254  | 2.723883  | 0.803434  |
| H | 1.555823  | 1.591020  | 0.896322  |
| C | 1.040913  | 3.479572  | -0.139939 |
| H | 0.671599  | 3.306046  | -1.160810 |
| C | -0.213857 | 3.765075  | 0.795897  |
| H | 1.625002  | 4.406627  | -0.210861 |
| H | -0.183559 | 3.109677  | 1.676637  |
| C | -1.649150 | 3.700951  | 0.116394  |
| H | -1.513962 | 3.682486  | -0.974854 |
| C | -2.700832 | 2.589515  | 0.486048  |
| H | -2.925010 | 2.655192  | 1.563408  |
| H | -3.639690 | 2.853784  | -0.023166 |
| H | -2.152921 | 4.652975  | 0.330157  |
| H | -0.095362 | 4.781274  | 1.192748  |

Sum of electronic and zero-point Energies= -926.531257

Sum of electronic and thermal Energies= -926.512773

Sum of electronic and thermal Enthalpies= -926.511829

Sum of electronic and thermal Free Energies= -926.576179

### daec[n=1]-1-E1 (benzene)

|   |           |           |           |
|---|-----------|-----------|-----------|
| C | -2.136191 | -1.418857 | -0.364146 |
| H | -2.769150 | -1.485328 | -1.244985 |
| C | -2.628222 | -0.765697 | 0.780556  |
| C | -1.824111 | -0.715905 | 1.923924  |
| H | -2.201140 | -0.251011 | 2.832488  |
| C | -0.516420 | -1.209123 | 1.891687  |
| H | 0.137355  | -1.121935 | 2.756584  |
| C | -0.002811 | -1.761119 | 0.725327  |
| O | 1.334675  | -2.116915 | 0.655839  |
| C | -0.827543 | -1.917730 | -0.409190 |
| O | -0.253474 | -2.509580 | -1.488104 |
| C | -1.030605 | -2.650388 | -2.669266 |
| H | -1.336243 | -1.673940 | -3.072647 |

|   |           |           |           |
|---|-----------|-----------|-----------|
| H | -1.922936 | -3.268910 | -2.495781 |
| H | -0.381487 | -3.150811 | -3.393569 |
| C | 4.103287  | 0.954133  | 0.099607  |
| H | 4.844258  | 1.742065  | -0.028452 |
| C | 2.747268  | 1.226897  | -0.143394 |
| C | 2.313398  | 2.624312  | -0.577521 |
| H | 3.027395  | 2.976583  | -1.335957 |
| H | 2.433982  | 3.314246  | 0.273604  |
| C | 0.883098  | 2.758900  | -1.139390 |
| H | 0.701038  | 1.927293  | -1.835778 |
| H | 0.837379  | 3.669114  | -1.753347 |
| C | 1.822658  | 0.189954  | 0.025076  |
| H | 0.772546  | 0.367095  | -0.163801 |
| C | 2.229241  | -1.081544 | 0.447446  |
| C | 3.580020  | -1.350505 | 0.677773  |
| H | 3.882410  | -2.344315 | 0.998185  |
| C | 4.508829  | -0.322578 | 0.496876  |
| H | 5.564220  | -0.522657 | 0.674234  |
| C | -0.250946 | 2.812648  | -0.085742 |
| H | -0.395072 | 3.852951  | 0.243802  |
| H | 0.040470  | 2.253679  | 0.814283  |
| C | -1.571395 | 2.231495  | -0.616374 |
| H | -1.389083 | 1.187394  | -0.904786 |
| C | -2.757519 | 2.277043  | 0.367941  |
| H | -1.858097 | 2.750433  | -1.545278 |
| H | -2.403061 | 2.031860  | 1.379483  |
| C | -3.913422 | 1.319774  | -0.023405 |
| H | -3.862280 | 1.117256  | -1.103326 |
| C | -3.953453 | -0.031715 | 0.746035  |
| H | -4.272480 | 0.164812  | 1.778740  |
| H | -4.732773 | -0.662129 | 0.293675  |
| H | -4.882862 | 1.810239  | 0.141945  |
| H | -3.134947 | 3.307999  | 0.425891  |

Sum of electronic and zero-point Energies= -926.605208

Sum of electronic and thermal Energies= -926.585597

Sum of electronic and thermal Enthalpies= -926.584652

Sum of electronic and thermal Free Energies= -926.652908

### daec[n=1]-1-E2 (benzene)

|   |           |           |           |
|---|-----------|-----------|-----------|
| C | 1.847852  | 1.478110  | 0.617048  |
| H | 2.258003  | 1.503013  | 1.622378  |
| C | 2.661912  | 1.027618  | -0.436414 |
| C | 2.149166  | 1.050273  | -1.738857 |
| H | 2.772216  | 0.740296  | -2.575882 |
| C | 0.811996  | 1.397219  | -1.965594 |
| H | 0.381353  | 1.353032  | -2.963493 |
| C | -0.014265 | 1.744323  | -0.902866 |
| O | -1.367944 | 1.955489  | -1.106010 |
| C | 0.515914  | 1.847374  | 0.400641  |
| O | -0.346800 | 2.258706  | 1.364867  |
| C | 0.116925  | 2.309900  | 2.706986  |
| H | 0.951465  | 3.016836  | 2.820220  |
| H | 0.426574  | 1.317831  | 3.066352  |
| H | -0.732732 | 2.658427  | 3.301040  |
| C | -3.956053 | -1.035202 | 0.224368  |
| H | -4.648731 | -1.798231 | 0.577129  |
| C | -2.606656 | -1.363439 | 0.012943  |
| C | -2.113582 | -2.783284 | 0.279308  |
| H | -2.821475 | -3.479628 | -0.193765 |
| H | -2.188551 | -2.987220 | 1.359823  |
| C | -0.688409 | -3.121712 | -0.202416 |
| H | -0.565601 | -2.745877 | -1.228636 |
| H | -0.601097 | -4.214342 | -0.280098 |
| C | -1.746941 | -0.360010 | -0.446655 |
| H | -0.704934 | -0.582810 | -0.634598 |
| C | -2.206811 | 0.944178  | -0.664138 |

|   |           |           |           |
|---|-----------|-----------|-----------|
| C | -3.550120 | 1.263255  | -0.463627 |
| H | -3.893684 | 2.279009  | -0.641880 |
| C | -4.417442 | 0.260297  | -0.021860 |
| H | -5.467577 | 0.498446  | 0.139040  |
| C | 0.462793  | -2.591610 | 0.687572  |
| H | 0.672476  | -3.320012 | 1.485857  |
| H | 0.150185  | -1.670739 | 1.199444  |
| C | 1.740309  | -2.295547 | -0.114645 |
| H | 1.499891  | -1.533751 | -0.868507 |
| C | 2.944288  | -1.813285 | 0.719703  |
| H | 2.037156  | -3.191723 | -0.682836 |
| H | 2.595327  | -1.122091 | 1.500669  |
| C | 4.044535  | -1.125149 | -0.129381 |
| H | 3.974056  | -1.482968 | -1.166874 |
| C | 4.019979  | 0.430311  | -0.127697 |
| H | 4.349973  | 0.782946  | 0.859375  |
| H | 4.767241  | 0.785847  | -0.851477 |
| H | 5.039446  | -1.429309 | 0.225031  |
| H | 3.374636  | -2.672266 | 1.254318  |

Sum of electronic and zero-point Energies= -926.605824  
Sum of electronic and thermal Energies= -926.586251  
Sum of electronic and thermal Enthalpies= -926.585307  
Sum of electronic and thermal Free Energies= -926.653115

daec[n=1]-2-TS (benzene)

|   |           |           |           |
|---|-----------|-----------|-----------|
| C | 2.894956  | 0.746900  | -0.024241 |
| H | 3.919228  | 1.064391  | -0.202214 |
| C | 1.850024  | 1.699526  | -0.039207 |
| C | 0.590916  | 1.198044  | 0.193182  |
| H | -0.261709 | 1.833552  | 0.202416  |
| C | 0.338675  | -0.130982 | 0.367107  |
| H | -0.690470 | -0.380003 | 0.453223  |
| C | 1.318029  | -1.097109 | 0.379580  |
| O | 0.967130  | -2.449998 | 0.544058  |
| C | 2.648254  | -0.638067 | 0.191705  |
| O | 3.619130  | -1.595199 | 0.208815  |
| C | 4.967523  | -1.196519 | 0.021415  |
| H | 5.298187  | -0.497893 | 0.804237  |
| H | 5.123234  | -0.735448 | -0.965254 |
| H | 5.560732  | -2.113770 | 0.085346  |
| C | -2.899055 | -2.219142 | -0.899749 |
| H | -3.837980 | -1.962572 | -1.388000 |
| C | -2.610864 | -1.689158 | 0.368549  |
| C | -3.442973 | -0.547103 | 0.961514  |
| H | -4.393413 | -0.486951 | 0.413221  |
| H | -3.703335 | -0.786175 | 2.003190  |
| C | -2.804694 | 0.901307  | 1.003583  |
| H | -1.895357 | 0.873122  | 1.617866  |
| H | -3.519266 | 1.510030  | 1.578313  |
| C | -1.403502 | -2.086985 | 0.976023  |
| H | -1.147081 | -1.706981 | 1.963048  |
| C | -0.383440 | -2.660512 | 0.196731  |
| C | -0.679754 | -3.192933 | -1.057210 |
| H | 0.108687  | -3.653576 | -1.647389 |
| C | -1.972822 | -3.028531 | -1.567629 |
| H | -2.221920 | -3.444255 | -2.542105 |
| C | -2.537022 | 1.636519  | -0.340956 |
| H | -3.478652 | 1.608580  | -0.911183 |
| H | -1.820731 | 1.076711  | -0.953786 |
| C | -2.158294 | 3.169827  | -0.291146 |
| H | -2.912310 | 3.650349  | 0.351059  |
| C | -0.777148 | 3.809371  | 0.140406  |
| H | -2.360971 | 3.550830  | -1.303478 |
| H | -1.013819 | 4.877010  | 0.251852  |
| C | 0.459200  | 3.717274  | -0.844923 |
| H | 0.185175  | 3.105721  | -1.715823 |
| C | 1.850596  | 3.199619  | -0.322964 |
| H | 2.606436  | 3.452368  | -1.080427 |
| H | 2.135082  | 3.764480  | 0.579758  |
| H | 0.636069  | 4.726819  | -1.239349 |

|   |           |          |          |
|---|-----------|----------|----------|
| H | -0.497540 | 3.487155 | 1.151872 |
|---|-----------|----------|----------|

Sum of electronic and zero-point Energies= -926.525459  
Sum of electronic and thermal Energies= -926.507066  
Sum of electronic and thermal Enthalpies= -926.506121  
Sum of electronic and thermal Free Energies= -926.570149

daec[n=1]-2-E1 (benzene)

|   |           |           |           |
|---|-----------|-----------|-----------|
| C | 1.687349  | 1.789100  | 0.509059  |
| H | 2.150117  | 1.869147  | 1.488949  |
| C | 2.452341  | 1.302101  | -0.567297 |
| C | 1.872569  | 1.247882  | -1.837590 |
| H | 2.458641  | 0.908186  | -2.689196 |
| C | 0.509908  | 1.530556  | -2.002691 |
| H | 0.022166  | 1.401066  | -2.966292 |
| C | -0.267981 | 1.876735  | -0.907250 |
| O | -1.647955 | 1.927755  | -1.013371 |
| C | 0.330185  | 2.081564  | 0.355723  |
| O | -0.500332 | 2.489295  | 1.348903  |
| C | 0.034635  | 2.624780  | 2.658280  |
| H | 0.837280  | 3.375550  | 2.692046  |
| H | 0.413832  | 1.666276  | 3.041203  |
| H | -0.796789 | 2.958885  | 3.285517  |
| C | -3.718727 | -1.470349 | 0.244265  |
| H | -4.282114 | -2.344145 | 0.569296  |
| C | -2.339811 | -1.582704 | -0.001371 |
| C | -1.658085 | -2.938885 | 0.156948  |
| H | -1.805884 | -3.288396 | 1.191234  |
| H | -2.217409 | -3.654257 | -0.464615 |
| C | -0.161019 | -3.068172 | -0.201174 |
| H | 0.046389  | -2.538088 | -1.141961 |
| H | 0.028300  | -4.130086 | -0.417196 |
| C | -1.645648 | -0.443868 | -0.419708 |
| H | -0.584243 | -0.508408 | -0.620615 |
| C | -2.304734 | 0.782687  | -0.588565 |
| C | -3.676328 | 0.886218  | -0.354514 |
| H | -4.172432 | 1.843655  | -0.491358 |
| C | -4.373678 | -0.250456 | 0.062946  |
| H | -5.443539 | -0.178701 | 0.251759  |
| C | 0.837247  | -2.639508 | 0.893156  |
| H | 0.600761  | -3.206573 | 1.806223  |
| H | 0.696877  | -1.579914 | 1.152557  |
| C | 2.313161  | -2.898606 | 0.506742  |
| H | 2.367907  | -3.863443 | -0.019193 |
| C | 2.960001  | -1.795168 | -0.363363 |
| H | 2.912674  | -3.025803 | 1.420645  |
| H | 3.718810  | -2.237046 | -1.025537 |
| C | 3.621640  | -0.674402 | 0.464924  |
| H | 3.022909  | -0.484691 | 1.367466  |
| C | 3.800938  | 0.675660  | -0.280745 |
| H | 4.413841  | 1.342073  | 0.343144  |
| H | 4.354195  | 0.517405  | -1.216730 |
| H | 4.603217  | -1.021693 | 0.820014  |
| H | 2.197012  | -1.368406 | -1.028271 |

Sum of electronic and zero-point Energies= -926.605031  
Sum of electronic and thermal Energies= -926.585454  
Sum of electronic and thermal Enthalpies= -926.584510  
Sum of electronic and thermal Free Energies= -926.652877

daec[n=1]-2-E2 (benzene)

|   |           |           |           |
|---|-----------|-----------|-----------|
| C | -1.757518 | -1.720725 | -0.539557 |
| H | -2.275998 | -1.724103 | -1.494042 |
| C | -2.447808 | -1.293993 | 0.606817  |
| C | -1.793724 | -1.333625 | 1.844481  |
| H | -2.324194 | -1.044058 | 2.749774  |
| C | -0.433587 | -1.644593 | 1.910388  |
| H | 0.111332  | -1.591162 | 2.850263  |
| C | 0.273826  | -1.939109 | 0.750984  |
| O | 1.655910  | -2.023779 | 0.788619  |
| C | -0.396887 | -2.051683 | -0.483305 |
| O | 0.366177  | -2.402412 | -1.549970 |

|   |           |           |           |
|---|-----------|-----------|-----------|
| C | -0.250050 | -2.455545 | -2.829449 |
| H | -0.636104 | -1.471956 | -3.134323 |
| H | -1.065688 | -3.192400 | -2.855719 |
| H | 0.536043  | -2.764067 | -3.524572 |
| C | 3.786928  | 1.480005  | 0.017087  |
| H | 4.367899  | 2.378125  | -0.187998 |
| C | 2.384585  | 1.532433  | -0.026818 |
| C | 1.686271  | 2.848387  | -0.354369 |
| H | 1.739899  | 3.507147  | 0.527797  |
| H | 2.291589  | 3.353059  | -1.120341 |
| C | 0.217799  | 2.796651  | -0.845343 |
| H | 0.059834  | 1.890502  | -1.447520 |
| H | 0.069840  | 3.639439  | -1.536338 |
| C | 1.666602  | 0.360486  | 0.234059  |
| H | 0.585066  | 0.382695  | 0.208154  |
| C | 2.326890  | -0.841764 | 0.523449  |
| C | 3.722310  | -0.888074 | 0.565507  |
| H | 4.219761  | -1.828386 | 0.789356  |
| C | 4.441743  | 0.281543  | 0.312820  |
| H | 5.529786  | 0.253074  | 0.339673  |
| C | -0.861475 | 2.913866  | 0.250903  |
| H | -0.668732 | 3.839123  | 0.814664  |
| H | -0.767356 | 2.095143  | 0.979753  |
| C | -2.302862 | 2.957841  | -0.308867 |
| H | -2.302695 | 3.581303  | -1.215522 |
| C | -2.915703 | 1.574962  | -0.630375 |
| H | -2.956465 | 3.477374  | 0.407814  |
| H | -3.634319 | 1.667522  | -1.457984 |
| C | -3.631441 | 0.927375  | 0.572901  |
| H | -3.079901 | 1.157005  | 1.495890  |
| C | -3.796170 | -0.615039 | 0.489131  |
| H | -4.460509 | -0.940847 | 1.301712  |
| H | -4.288058 | -0.889057 | -0.454669 |
| H | -4.623883 | 1.387668  | 0.689030  |
| H | -2.122230 | 0.910000  | -0.996713 |

Sum of electronic and zero-point Energies= -926.604615  
Sum of electronic and thermal Energies= -926.585023  
Sum of electronic and thermal Enthalpies= -926.584078  
Sum of electronic and thermal Free Energies= -926.652687

#### daec[n=1]-3-TS (benzene)

|   |           |           |           |
|---|-----------|-----------|-----------|
| C | -3.037952 | 0.373286  | -0.075226 |
| H | -4.100506 | 0.544764  | -0.227067 |
| C | -2.139426 | 1.466822  | -0.050870 |
| C | -0.822657 | 1.134843  | 0.149343  |
| H | -0.084257 | 1.889473  | 0.234168  |
| C | -0.368533 | -0.150755 | 0.220060  |
| H | 0.690578  | -0.249686 | 0.252415  |
| C | -1.205798 | -1.242754 | 0.245943  |
| O | -0.683486 | -2.536518 | 0.411649  |
| C | -2.592981 | -0.966323 | 0.102813  |
| O | -3.419931 | -2.050563 | 0.128635  |
| C | -4.815194 | -1.843229 | -0.019804 |
| H | -5.219907 | -1.207041 | 0.781292  |
| H | -5.272134 | -2.835415 | 0.044552  |
| H | -5.059919 | -1.397105 | -0.995297 |
| C | 3.276932  | -1.851275 | -0.604069 |
| H | 4.230929  | -1.508286 | -1.001411 |
| C | 2.753699  | -1.274199 | 0.566391  |
| C | 3.300475  | 0.026122  | 1.172660  |
| H | 4.299168  | -0.148951 | 1.601418  |
| H | 2.659489  | 0.308488  | 2.018700  |
| C | 3.484634  | 1.258066  | 0.205501  |
| H | 4.198207  | 0.939499  | -0.567049 |
| H | 4.021786  | 2.018297  | 0.792904  |
| C | 1.544984  | -1.801375 | 1.055999  |
| H | 1.118758  | -1.389965 | 1.967695  |
| C | 0.712422  | -2.565809 | 0.220049  |
| C | 1.231814  | -3.128362 | -0.943253 |
| H | 0.594749  | -3.729671 | -1.587254 |

|   |           |           |           |
|---|-----------|-----------|-----------|
| C | 2.552214  | -2.822022 | -1.304082 |
| H | 2.975799  | -3.265675 | -2.203166 |
| C | 2.303503  | 1.963151  | -0.550439 |
| H | 1.592992  | 1.212437  | -0.911137 |
| H | 2.743954  | 2.386498  | -1.465384 |
| C | 1.538987  | 3.134566  | 0.149640  |
| H | 2.253243  | 3.955352  | 0.305731  |
| C | 0.291592  | 3.706393  | -0.661010 |
| H | 1.228712  | 2.838789  | 1.162190  |
| H | 0.150401  | 3.104859  | -1.569157 |
| C | -1.101439 | 3.856148  | 0.089489  |
| H | -0.933061 | 3.751897  | 1.171346  |
| C | -2.341651 | 2.961094  | -0.295723 |
| H | -2.582346 | 3.126034  | -1.358600 |
| H | -3.206420 | 3.349678  | 0.262946  |
| H | -1.439140 | 4.891211  | -0.052651 |
| H | 0.572507  | 4.704831  | -1.019928 |

Sum of electronic and zero-point Energies= -926.521602  
Sum of electronic and thermal Energies= -926.503127  
Sum of electronic and thermal Enthalpies= -926.502183  
Sum of electronic and thermal Free Energies= -926.566375

#### daec[n=1]-3-E1 (benzene)

|   |           |           |           |
|---|-----------|-----------|-----------|
| C | 1.973234  | -1.349201 | 0.608108  |
| H | 2.409526  | -1.244298 | 1.597047  |
| C | 2.690704  | -0.877924 | -0.504973 |
| C | 2.157545  | -1.079042 | -1.783789 |
| H | 2.715675  | -0.762099 | -2.662975 |
| C | 0.869763  | -1.606150 | -1.935900 |
| H | 0.409350  | -1.689947 | -2.917957 |
| C | 0.113357  | -1.939853 | -0.818616 |
| O | -1.238168 | -2.231433 | -0.937920 |
| C | 0.686616  | -1.880734 | 0.468712  |
| O | -0.102415 | -2.294454 | 1.493313  |
| C | 0.402550  | -2.188613 | 2.817267  |
| H | 1.311441  | -2.792258 | 2.953788  |
| H | -0.386973 | -2.576040 | 3.467658  |
| H | 0.613053  | -1.143999 | 3.088275  |
| C | -3.756035 | 0.966696  | 0.026987  |
| H | -4.424100 | 1.785305  | 0.290730  |
| C | -2.466561 | 1.241300  | -0.451635 |
| C | -1.940189 | 2.655037  | -0.622313 |
| H | -2.781318 | 3.329030  | -0.836794 |
| H | -1.289656 | 2.687054  | -1.507366 |
| C | -1.172379 | 3.243951  | 0.589745  |
| H | -1.860286 | 3.288987  | 1.447204  |
| H | -0.927689 | 4.288322  | 0.341250  |
| C | -1.640696 | 0.163553  | -0.790168 |
| H | -0.652033 | 0.363753  | -1.185141 |
| C | -2.065169 | -1.158432 | -0.630118 |
| C | -3.355686 | -1.429270 | -0.169445 |
| H | -3.680160 | -2.460536 | -0.055999 |
| C | -4.192676 | -0.357354 | 0.152023  |
| H | -5.199388 | -0.560370 | 0.513483  |
| C | 0.114866  | 2.530007  | 1.049171  |
| H | -0.133158 | 1.519399  | 1.404151  |
| H | 0.486793  | 3.074179  | 1.931746  |
| C | 1.256534  | 2.425028  | 0.020765  |
| H | 1.394038  | 3.391098  | -0.490967 |
| C | 2.597749  | 1.998578  | 0.658739  |
| H | 0.988071  | 1.705256  | -0.762893 |
| H | 2.399450  | 1.222145  | 1.410479  |
| C | 3.663745  | 1.483592  | -0.346313 |
| H | 3.365087  | 1.754430  | -1.369192 |
| C | 3.939531  | -0.047080 | -0.298022 |
| H | 4.391154  | -0.293867 | 0.673036  |
| H | 4.689902  | -0.286294 | -1.064713 |
| H | 4.622686  | 1.990522  | -0.169639 |
| H | 3.002375  | 2.852781  | 1.220308  |

Sum of electronic and zero-point Energies= -926.604649

Sum of electronic and thermal Energies= -926.585125  
Sum of electronic and thermal Enthalpies= -926.584180  
Sum of electronic and thermal Free Energies= -926.651737

daec[n=1]-3-E2 (benzene)

|   |           |           |           |
|---|-----------|-----------|-----------|
| C | 2.191089  | -1.376895 | -0.408256 |
| H | 2.756712  | -1.428773 | -1.334738 |
| C | 2.695157  | -0.606634 | 0.655571  |
| C | 1.987138  | -0.580028 | 1.861682  |
| H | 2.384911  | -0.032918 | 2.713747  |
| C | 0.728039  | -1.181326 | 1.952969  |
| H | 0.126115  | -1.089008 | 2.854213  |
| C | 0.181951  | -1.834682 | 0.856512  |
| O | -1.150263 | -2.223421 | 0.883780  |
| C | 0.942544  | -2.005447 | -0.319877 |
| O | 0.351286  | -2.713161 | -1.316641 |
| C | 1.055986  | -2.865033 | -2.541323 |
| H | 1.234467  | -1.895815 | -3.029487 |
| H | 0.411920  | -3.475789 | -3.180451 |
| H | 2.015119  | -3.381995 | -2.394539 |
| C | -3.892179 | 0.769164  | -0.123273 |
| H | -4.622173 | 1.539385  | -0.367480 |
| C | -2.555270 | 0.921022  | -0.517965 |
| C | -2.065426 | 2.130474  | -1.294660 |
| H | -2.911692 | 2.570570  | -1.840124 |
| H | -1.351173 | 1.795479  | -2.060024 |
| C | -1.413727 | 3.262847  | -0.458485 |
| H | -2.159326 | 3.637215  | 0.258608  |
| H | -1.209902 | 4.096638  | -1.148149 |
| C | -1.646639 | -0.092691 | -0.192776 |
| H | -0.615665 | 0.011234  | -0.505869 |
| C | -2.042957 | -1.226161 | 0.522339  |
| C | -3.380153 | -1.382323 | 0.899603  |
| H | -3.682965 | -2.271284 | 1.447376  |
| C | -4.294081 | -0.378606 | 0.570075  |
| H | -5.336232 | -0.493594 | 0.863314  |
| C | -0.122283 | 2.939300  | 0.319865  |
| H | -0.333018 | 2.178653  | 1.085011  |
| H | 0.157919  | 3.849510  | 0.873141  |
| C | 1.089136  | 2.478597  | -0.511539 |
| H | 1.222953  | 3.139622  | -1.382966 |
| C | 2.399651  | 2.446341  | 0.307129  |
| H | 0.901286  | 1.477781  | -0.921743 |
| H | 2.174600  | 2.064218  | 1.312024  |
| C | 3.538828  | 1.598811  | -0.323152 |
| H | 3.271663  | 1.334979  | -1.356667 |
| C | 3.894386  | 0.293571  | 0.446360  |
| H | 4.321669  | 0.562742  | 1.422122  |
| H | 4.683707  | -0.232392 | -0.109657 |
| H | 4.459053  | 2.195002  | -0.395455 |
| H | 2.744709  | 3.479393  | 0.455894  |

Sum of electronic and zero-point Energies= -926.604519  
Sum of electronic and thermal Energies= -926.584921  
Sum of electronic and thermal Enthalpies= -926.583977  
Sum of electronic and thermal Free Energies= -926.652200

daec[n=1]-4-TS (benzene)

|   |           |           |           |
|---|-----------|-----------|-----------|
| C | -2.505417 | 1.963852  | -0.002251 |
| H | -3.377572 | 2.606175  | 0.110543  |
| C | -1.189646 | 2.466790  | 0.037160  |
| C | -0.214969 | 1.511234  | -0.117617 |
| H | 0.800414  | 1.807310  | -0.137813 |
| C | -0.463189 | 0.179600  | -0.229675 |
| H | 0.397096  | -0.444452 | -0.259287 |
| C | -1.728587 | -0.356273 | -0.318103 |
| O | -1.839340 | -1.752717 | -0.529413 |
| C | -2.794117 | 0.578159  | -0.202816 |
| O | -4.125690 | 0.282120  | -0.298209 |
| C | -4.576919 | -0.997665 | 0.144409  |
| H | -4.218772 | -1.217222 | 1.160387  |

|   |           |           |           |
|---|-----------|-----------|-----------|
| H | -4.260690 | -1.800053 | -0.530940 |
| H | -5.670193 | -0.936454 | 0.154856  |
| C | 1.870956  | -3.128100 | 0.777207  |
| H | 2.843266  | -3.334352 | 1.222454  |
| C | 1.797201  | -2.434336 | -0.444648 |
| C | 3.030743  | -1.766302 | -1.066459 |
| H | 2.789553  | -1.488663 | -2.101945 |
| H | 3.850321  | -2.496896 | -1.127432 |
| C | 3.626059  | -0.486131 | -0.352146 |
| H | 4.472740  | -0.161967 | -0.975773 |
| H | 4.053834  | -0.777593 | 0.618192  |
| C | 0.517202  | -2.240308 | -0.998952 |
| H | 0.419806  | -1.719130 | -1.948970 |
| C | -0.642263 | -2.439233 | -0.221177 |
| C | -0.553255 | -3.124591 | 0.986812  |
| H | -1.447216 | -3.286860 | 1.584037  |
| C | 0.710256  | -3.522136 | 1.447814  |
| H | 0.788092  | -4.069366 | 2.385325  |
| C | 2.611940  | 0.667178  | -0.154449 |
| H | 1.934686  | 0.337214  | 0.639138  |
| H | 2.024627  | 0.719241  | -1.078192 |
| C | 3.085297  | 2.113569  | 0.213279  |
| H | 3.552259  | 2.580865  | -0.667026 |
| C | 2.043786  | 3.141493  | 0.848829  |
| H | 3.885323  | 2.028988  | 0.963900  |
| H | 1.537888  | 2.641528  | 1.686665  |
| C | 0.973765  | 3.930384  | -0.033000 |
| H | 1.225005  | 4.996696  | 0.040825  |
| C | -0.575386 | 3.848149  | 0.290228  |
| H | -1.071617 | 4.625990  | -0.308370 |
| H | -0.736649 | 4.138138  | 1.340805  |
| H | 1.110176  | 3.676261  | -1.093885 |
| H | 2.677124  | 3.907376  | 1.316814  |

Sum of electronic and zero-point Energies= -926.518587  
Sum of electronic and thermal Energies= -926.500009  
Sum of electronic and thermal Enthalpies= -926.499065  
Sum of electronic and thermal Free Energies= -926.563812

daec[n=1]-4-E1 (benzene)

|   |           |           |           |
|---|-----------|-----------|-----------|
| C | -1.818588 | -1.797462 | -0.581601 |
| H | -2.342476 | -1.949383 | -1.523742 |
| C | -2.469148 | -1.207656 | 0.511011  |
| C | -1.757903 | -1.086345 | 1.714603  |
| H | -2.251377 | -0.690658 | 2.600001  |
| C | -0.397627 | -1.394832 | 1.766413  |
| H | 0.181804  | -1.216204 | 2.669584  |
| C | 0.268873  | -1.848015 | 0.627889  |
| O | 1.662103  | -1.907060 | 0.635516  |
| C | -0.459558 | -2.131987 | -0.540976 |
| O | 0.113458  | -2.585261 | -1.697114 |
| C | 0.941540  | -3.750412 | -1.604475 |
| H | 0.398586  | -4.575287 | -1.121070 |
| H | 1.867864  | -3.551185 | -1.055903 |
| H | 1.176887  | -4.030117 | -2.636329 |
| C | 3.437645  | 1.857076  | 0.242380  |
| H | 3.892222  | 2.844619  | 0.180777  |
| C | 2.278209  | 1.576762  | -0.496186 |
| C | 1.598472  | 2.619779  | -1.366225 |
| H | 1.337563  | 2.164559  | -2.333317 |
| H | 2.310015  | 3.427288  | -1.586048 |
| C | 0.313856  | 3.253472  | -0.765012 |
| H | -0.035130 | 4.021278  | -1.472533 |
| H | 0.573987  | 3.785782  | 0.162554  |
| C | 1.726793  | 0.292485  | -0.400883 |
| H | 0.851005  | 0.044237  | -0.988896 |
| C | 2.268172  | -0.663530 | 0.460866  |
| C | 3.432782  | -0.389262 | 1.180599  |
| H | 3.851891  | -1.147596 | 1.837285  |
| C | 4.016568  | 0.874393  | 1.052856  |
| H | 4.923163  | 1.100916  | 1.611244  |

|                                                          |           |           |           |
|----------------------------------------------------------|-----------|-----------|-----------|
| C                                                        | -0.825540 | 2.262153  | -0.476644 |
| H                                                        | -0.500215 | 1.566736  | 0.307191  |
| H                                                        | -1.003280 | 1.647073  | -1.371458 |
| C                                                        | -2.147364 | 2.913308  | -0.027728 |
| H                                                        | -2.628720 | 3.419038  | -0.879622 |
| C                                                        | -3.125963 | 1.915920  | 0.629498  |
| H                                                        | -1.925162 | 3.702814  | 0.706844  |
| H                                                        | -2.587932 | 1.430249  | 1.454719  |
| C                                                        | -3.725205 | 0.834842  | -0.305436 |
| H                                                        | -4.725922 | 1.148400  | -0.634746 |
| C                                                        | -3.836647 | -0.581003 | 0.330970  |
| H                                                        | -4.457515 | -1.210676 | -0.321170 |
| H                                                        | -4.357418 | -0.511107 | 1.296260  |
| H                                                        | -3.122649 | 0.743900  | -1.219023 |
| H                                                        | -3.947882 | 2.475766  | 1.098682  |
| Sum of electronic and zero-point Energies= -926.602382   |           |           |           |
| Sum of electronic and thermal Energies= -926.582563      |           |           |           |
| Sum of electronic and thermal Enthalpies= -926.581619    |           |           |           |
| Sum of electronic and thermal Free Energies= -926.650610 |           |           |           |

daec[n=1]-4-E2 (benzene)

|                                                        |           |           |           |
|--------------------------------------------------------|-----------|-----------|-----------|
| C                                                      | 1.640260  | -1.700396 | -0.638128 |
| H                                                      | 2.047608  | -1.737280 | -1.646164 |
| C                                                      | 2.448985  | -1.347072 | 0.451116  |
| C                                                      | 1.882329  | -1.395407 | 1.734820  |
| H                                                      | 2.497391  | -1.173541 | 2.605567  |
| C                                                      | 0.517071  | -1.638523 | 1.905701  |
| H                                                      | 0.058904  | -1.596854 | 2.891545  |
| C                                                      | -0.302497 | -1.834468 | 0.794409  |
| O                                                      | -1.687391 | -1.821469 | 0.930876  |
| C                                                      | 0.271230  | -1.940952 | -0.485543 |
| O                                                      | -0.481559 | -2.147032 | -1.610102 |
| C                                                      | -1.208471 | -3.379187 | -1.659061 |
| H                                                      | -1.922496 | -3.464776 | -0.832169 |
| H                                                      | -0.519851 | -4.236713 | -1.638883 |
| H                                                      | -1.749194 | -3.372927 | -2.610729 |
| C                                                      | -3.418244 | 1.803580  | -0.235686 |
| H                                                      | -3.871282 | 2.734779  | -0.572193 |
| C                                                      | -2.160044 | 1.824265  | 0.383182  |
| C                                                      | -1.384357 | 3.113015  | 0.599690  |
| H                                                      | -1.044699 | 3.152657  | 1.645940  |
| H                                                      | -2.062840 | 3.966262  | 0.464726  |
| C                                                      | -0.148499 | 3.326290  | -0.316504 |
| H                                                      | 0.263961  | 4.319344  | -0.080217 |
| H                                                      | -0.478296 | 3.372004  | -1.365353 |
| C                                                      | -1.613161 | 0.606470  | 0.809851  |
| H                                                      | -0.654923 | 0.601866  | 1.314961  |
| C                                                      | -2.267250 | -0.603973 | 0.572920  |
| C                                                      | -3.531203 | -0.619452 | -0.020521 |
| H                                                      | -4.042610 | -1.565210 | -0.181085 |
| C                                                      | -4.100217 | 0.594405  | -0.413935 |
| H                                                      | -5.082722 | 0.593885  | -0.882645 |
| C                                                      | 0.956019  | 2.265068  | -0.179608 |
| H                                                      | 0.571868  | 1.305314  | -0.546334 |
| H                                                      | 1.180923  | 2.114475  | 0.887037  |
| C                                                      | 2.257900  | 2.586205  | -0.937096 |
| H                                                      | 2.799257  | 3.400513  | -0.430009 |
| C                                                      | 3.176404  | 1.357873  | -1.116469 |
| H                                                      | 2.004697  | 2.967794  | -1.938246 |
| H                                                      | 2.583599  | 0.581616  | -1.618135 |
| C                                                      | 3.801467  | 0.779328  | 0.178932  |
| H                                                      | 4.828638  | 1.154769  | 0.288914  |
| C                                                      | 3.836813  | -0.775838 | 0.244705  |
| H                                                      | 4.492201  | -1.076743 | 1.073700  |
| H                                                      | 4.285789  | -1.172392 | -0.676625 |
| H                                                      | 3.254168  | 1.138377  | 1.060758  |
| H                                                      | 3.984296  | 1.613422  | -1.817209 |
| Sum of electronic and zero-point Energies= -926.601512 |           |           |           |
| Sum of electronic and thermal Energies= -926.581855    |           |           |           |
| Sum of electronic and thermal Enthalpies= -926.580911  |           |           |           |

Sum of electronic and thermal Free Energies= -926.648772

daec[n=2]-1-TS (benzene)

|   |           |           |           |
|---|-----------|-----------|-----------|
| C | -3.043461 | 0.571912  | 0.022509  |
| H | -4.121084 | 0.692522  | -0.053590 |
| C | -2.480670 | -0.720673 | -0.065139 |
| C | -1.105892 | -0.796171 | 0.048785  |
| H | -0.600741 | -1.737858 | 0.026542  |
| C | -0.311403 | 0.320280  | 0.175732  |
| H | 0.745590  | 0.153759  | 0.182588  |
| C | -0.833659 | 1.594762  | 0.279043  |
| O | -0.008895 | 2.712072  | 0.439194  |
| C | -2.244466 | 1.723362  | 0.211177  |
| O | -2.731576 | 2.991395  | 0.323849  |
| C | -4.135183 | 3.183523  | 0.250661  |
| H | -4.295018 | 4.259667  | 0.367837  |
| H | -4.540411 | 2.862937  | -0.720611 |
| H | -4.661840 | 2.651281  | 1.056647  |
| C | 3.664993  | 1.370103  | -0.941535 |
| H | 4.531286  | 0.895668  | -1.400039 |
| C | 3.182242  | 0.889290  | 0.286208  |
| C | 3.720826  | -0.398487 | 0.905670  |
| H | 4.195026  | -0.168645 | 1.872280  |
| H | 4.520840  | -0.790324 | 0.262385  |
| C | 2.680038  | -1.531115 | 1.187692  |
| H | 1.884051  | -1.121237 | 1.826103  |
| H | 3.195239  | -2.275305 | 1.813813  |
| C | 2.082045  | 1.550276  | 0.856844  |
| H | 1.682945  | 1.216234  | 1.811674  |
| C | 1.323829  | 2.449249  | 0.094131  |
| C | 1.813679  | 2.931701  | -1.118706 |
| H | 1.223920  | 3.641180  | -1.693769 |
| C | 3.024055  | 2.423339  | -1.602264 |
| H | 3.421746  | 2.791036  | -2.546270 |
| C | 2.019524  | -2.289384 | 0.004083  |
| H | 2.799626  | -2.772675 | -0.604048 |
| H | 1.511900  | -1.588444 | -0.670295 |
| C | 1.034165  | -3.378054 | 0.522117  |
| C | 0.148062  | -4.165960 | -0.495834 |
| C | -1.176698 | -3.580893 | -1.084201 |
| H | -1.535356 | -4.328042 | -1.806991 |
| H | -0.962792 | -2.691147 | -1.687447 |
| H | -0.119287 | -5.111092 | 0.001063  |
| H | 0.780422  | -4.455640 | -1.349011 |
| H | 0.399262  | -2.944312 | 1.308047  |
| H | 1.642703  | -4.132124 | 1.043963  |
| C | -2.334796 | -3.298438 | -0.066900 |
| H | -3.004747 | -4.168824 | -0.059130 |
| H | -1.930447 | -3.235323 | 0.953217  |
| C | -3.215967 | -2.034408 | -0.309523 |
| H | -3.604130 | -2.053958 | -1.341062 |
| H | -4.102523 | -2.102356 | 0.338467  |

Sum of electronic and zero-point Energies= -965.844364

Sum of electronic and thermal Energies= -965.824772

Sum of electronic and thermal Enthalpies= -965.823828

Sum of electronic and thermal Free Energies= -965.890590

daec[n=2]-1-E1 (benzene)

|   |           |          |           |
|---|-----------|----------|-----------|
| C | 1.525178  | 1.969196 | 0.505537  |
| H | 1.999965  | 2.084706 | 1.475616  |
| C | 2.319375  | 1.633258 | -0.604239 |
| C | 1.712111  | 1.527682 | -1.860902 |
| H | 2.313995  | 1.296369 | -2.737907 |
| C | 0.325477  | 1.657586 | -1.989882 |
| H | -0.165388 | 1.529303 | -2.952059 |
| C | -0.463004 | 1.901002 | -0.871776 |
| O | -1.842379 | 1.929375 | -0.981101 |
| C | 0.137056  | 2.106914 | 0.388493  |
| O | -0.708768 | 2.389055 | 1.412466  |
| C | -0.160942 | 2.545687 | 2.714136  |

|   |           |           |           |
|---|-----------|-----------|-----------|
| H | -1.009985 | 2.760542  | 3.369362  |
| H | 0.337026  | 1.627274  | 3.057033  |
| H | 0.549196  | 3.384131  | 2.756415  |
| C | -3.974535 | -1.420940 | 0.284184  |
| H | -4.553297 | -2.282369 | 0.615026  |
| C | -2.613203 | -1.577469 | -0.026334 |
| C | -1.977238 | -2.958744 | 0.098270  |
| H | -2.639092 | -3.670391 | -0.417005 |
| H | -2.003537 | -3.262515 | 1.157239  |
| C | -0.545313 | -3.154936 | -0.439967 |
| H | -0.454094 | -2.677551 | -1.427094 |
| H | -0.403245 | -4.230948 | -0.619451 |
| C | -1.896500 | -0.454419 | -0.454601 |
| H | -0.849505 | -0.544528 | -0.717318 |
| C | -2.517076 | 0.797851  | -0.554524 |
| C | -3.871818 | 0.945768  | -0.254898 |
| H | -4.334998 | 1.925191  | -0.342319 |
| C | -4.592936 | -0.175052 | 0.162883  |
| H | -5.650174 | -0.070685 | 0.401025  |
| C | 0.592689  | -2.674087 | 0.479443  |
| H | 0.520080  | -3.204142 | 1.442680  |
| H | 0.466120  | -1.608777 | 0.712368  |
| C | 1.984406  | -2.921465 | -0.130162 |
| C | 3.171062  | -2.478466 | 0.750838  |
| C | 3.358824  | -0.953193 | 0.879461  |
| H | 4.008189  | -0.739841 | 1.742123  |
| H | 2.390416  | -0.492978 | 1.113442  |
| H | 4.096801  | -2.921208 | 0.351759  |
| H | 3.041250  | -2.909066 | 1.755543  |
| H | 2.041909  | -2.422704 | -1.109776 |
| H | 2.087059  | -3.997594 | -0.338656 |
| C | 3.963310  | -0.282714 | -0.367965 |
| H | 5.038402  | -0.511655 | -0.416345 |
| H | 3.518673  | -0.710216 | -1.277655 |
| C | 3.775761  | 1.256528  | -0.422234 |
| H | 4.175198  | 1.709459  | 0.496292  |
| H | 4.372116  | 1.652831  | -1.255831 |

Sum of electronic and zero-point Energies= -965.896237  
Sum of electronic and thermal Energies= -965.875391  
Sum of electronic and thermal Enthalpies= -965.874447  
Sum of electronic and thermal Free Energies= -965.945554

#### daec[n=2]-1-E2 (benzene)

|   |           |           |           |
|---|-----------|-----------|-----------|
| C | -1.573288 | -1.908524 | -0.621665 |
| H | -2.091213 | -1.942498 | -1.576244 |
| C | -2.314015 | -1.648539 | 0.545924  |
| C | -1.650947 | -1.638487 | 1.776728  |
| H | -2.210187 | -1.464589 | 2.693739  |
| C | -0.260711 | -1.791522 | 1.831646  |
| H | 0.274398  | -1.732748 | 2.776732  |
| C | 0.472412  | -1.969522 | 0.666140  |
| O | 1.854325  | -2.027249 | 0.719102  |
| C | -0.185102 | -2.074265 | -0.578488 |
| O | 0.611112  | -2.289288 | -1.657012 |
| C | 0.002783  | -2.338742 | -2.940302 |
| H | 0.817762  | -2.512604 | -3.648758 |
| H | -0.721741 | -3.162573 | -3.013541 |
| H | -0.495992 | -1.390548 | -3.188199 |
| C | 4.042346  | 1.480804  | 0.195324  |
| H | 4.638582  | 2.382780  | 0.065091  |
| C | 2.647837  | 1.542624  | 0.046837  |
| C | 1.985158  | 2.877708  | -0.275380 |
| H | 2.673929  | 3.435609  | -0.924874 |
| H | 1.919827  | 3.473611  | 0.649816  |
| C | 0.591886  | 2.846065  | -0.944944 |
| H | 0.550455  | 2.013027  | -1.662335 |
| H | 0.485465  | 3.761190  | -1.545942 |
| C | 1.907856  | 0.364874  | 0.211405  |
| H | 0.831543  | 0.381977  | 0.096832  |
| C | 2.541424  | -0.843762 | 0.523831  |

|   |           |           |           |
|---|-----------|-----------|-----------|
| C | 3.930160  | -0.899762 | 0.668310  |
| H | 4.404298  | -1.848225 | 0.907745  |
| C | 4.670958  | 0.270957  | 0.501612  |
| H | 5.753807  | 0.236369  | 0.608985  |
| C | -0.612740 | 2.770637  | 0.012229  |
| H | -0.588622 | 3.643750  | 0.683737  |
| H | -0.527744 | 1.891456  | 0.664382  |
| C | -1.958590 | 2.744597  | -0.733785 |
| C | -3.203048 | 2.648609  | 0.173488  |
| C | -3.418404 | 1.277702  | 0.846467  |
| H | -4.128636 | 1.391189  | 1.679321  |
| H | -2.475647 | 0.948242  | 1.302123  |
| H | -4.096690 | 2.901506  | -0.417920 |
| H | -3.129718 | 3.422616  | 0.952599  |
| H | -1.956469 | 1.908865  | -1.450363 |
| H | -2.037480 | 3.657870  | -1.343409 |
| C | -3.943767 | 0.185228  | -0.102808 |
| H | -5.009129 | 0.365516  | -0.310021 |
| H | -3.429855 | 0.252360  | -1.072249 |
| C | -3.774513 | -1.260382 | 0.432256  |
| H | -4.262063 | -1.350547 | 1.412916  |
| H | -4.298531 | -1.949107 | -0.245837 |

Sum of electronic and zero-point Energies= -965.896242  
Sum of electronic and thermal Energies= -965.875296  
Sum of electronic and thermal Enthalpies= -965.874352  
Sum of electronic and thermal Free Energies= -965.946185

#### daec[n=2]-2-TS (benzene)

|   |           |           |           |
|---|-----------|-----------|-----------|
| C | -2.885660 | 1.156608  | 0.000075  |
| H | -3.912451 | 1.501206  | -0.091992 |
| C | -2.603928 | -0.225868 | -0.048848 |
| C | -1.279782 | -0.584861 | 0.084484  |
| H | -1.010899 | -1.615773 | 0.100975  |
| C | -0.263052 | 0.335516  | 0.200605  |
| H | 0.735594  | -0.049818 | 0.233757  |
| C | -0.508812 | 1.693464  | 0.267257  |
| O | 0.526718  | 2.618624  | 0.421550  |
| C | -1.860112 | 2.115544  | 0.172229  |
| O | -2.066709 | 3.461073  | 0.246361  |
| C | -3.395712 | 3.945543  | 0.142010  |
| H | -3.323660 | 5.033945  | 0.228408  |
| H | -4.034385 | 3.561558  | 0.951299  |
| H | -3.847636 | 3.690385  | -0.828112 |
| C | 3.928123  | 0.602510  | -0.852338 |
| H | 4.712974  | -0.019525 | -1.279769 |
| C | 3.329458  | 0.223908  | 0.359988  |
| C | 3.618344  | -1.131285 | 1.001251  |
| H | 4.048274  | -0.983131 | 2.003626  |
| H | 4.391430  | -1.642175 | 0.410771  |
| C | 2.388311  | -2.079521 | 1.177608  |
| H | 1.643869  | -1.566180 | 1.803807  |
| H | 2.728500  | -2.938623 | 1.775094  |
| C | 2.341930  | 1.069846  | 0.891559  |
| H | 1.866652  | 0.821949  | 1.837776  |
| C | 1.785297  | 2.090325  | 0.107703  |
| C | 2.391514  | 2.467852  | -1.089930 |
| H | 1.960244  | 3.272424  | -1.680248 |
| C | 3.503776  | 1.746523  | -1.536120 |
| H | 3.989841  | 2.031088  | -2.467399 |
| C | 1.680431  | -2.605071 | -0.096460 |
| H | 2.376717  | -3.230718 | -0.675024 |
| H | 1.435394  | -1.759249 | -0.752127 |
| C | 0.375124  | -3.406986 | 0.203230  |
| C | -0.642271 | -3.454567 | -0.980395 |
| C | -2.152652 | -3.700754 | -0.656488 |
| H | -2.218943 | -4.693130 | -0.184012 |
| H | -2.658947 | -3.811336 | -1.627932 |
| H | -0.345946 | -4.274391 | -1.651745 |
| H | -0.542082 | -2.545567 | -1.586713 |
| H | -0.100479 | -2.971743 | 1.092921  |



|   |           |           |           |
|---|-----------|-----------|-----------|
| H | 0.632949  | -4.434742 | 0.497708  |
| C | -3.053723 | -2.773461 | 0.234100  |
| H | -3.955357 | -3.377790 | 0.408319  |
| H | -2.600847 | -2.647197 | 1.227660  |
| C | -3.576758 | -1.379260 | -0.255366 |
| H | -4.519152 | -1.174910 | 0.273690  |
| H | -3.850813 | -1.450169 | -1.320952 |

Sum of electronic and zero-point Energies= -965.843760  
Sum of electronic and thermal Energies= -965.824059  
Sum of electronic and thermal Enthalpies= -965.823115  
Sum of electronic and thermal Free Energies= -965.890276

daec[n=2]-2-E1 (benzene)

|   |           |           |           |
|---|-----------|-----------|-----------|
| C | -1.658582 | -1.697030 | 0.535178  |
| H | -2.137398 | -1.774203 | 1.507112  |
| C | -2.430919 | -1.312380 | -0.573313 |
| C | -1.818993 | -1.260374 | -1.832048 |
| H | -2.404809 | -0.999673 | -2.711604 |
| C | -0.448776 | -1.507123 | -1.966227 |
| H | 0.044376  | -1.432819 | -2.932911 |
| C | 0.322783  | -1.814375 | -0.851666 |
| O | 1.691887  | -1.985891 | -0.972161 |
| C | -0.285851 | -1.947717 | 0.414342  |
| O | 0.538195  | -2.287937 | 1.438437  |
| C | -0.013977 | -2.385729 | 2.744144  |
| H | 0.818810  | -2.659377 | 3.398298  |
| H | -0.787635 | -3.165101 | 2.799208  |
| H | -0.435956 | -1.426914 | 3.078359  |
| C | 4.146965  | 1.169542  | 0.213825  |
| H | 4.804463  | 1.976841  | 0.533972  |
| C | 2.806419  | 1.447234  | -0.100719 |
| C | 2.282368  | 2.877502  | -0.002988 |
| H | 2.909770  | 3.513142  | -0.646129 |
| H | 2.456187  | 3.244701  | 1.020977  |
| C | 0.805849  | 3.105069  | -0.378766 |
| H | 0.611684  | 2.650048  | -1.361296 |
| H | 0.649054  | 4.184040  | -0.520241 |
| C | 1.990235  | 0.387386  | -0.510960 |
| H | 0.956362  | 0.566959  | -0.776124 |
| C | 2.484229  | -0.920043 | -0.580202 |
| C | 3.819835  | -1.189800 | -0.279590 |
| H | 4.188948  | -2.210236 | -0.342548 |
| C | 4.644226  | -0.131980 | 0.113133  |
| H | 5.687155  | -0.331308 | 0.353860  |
| C | -0.216356 | 2.579601  | 0.649469  |
| H | -0.240194 | 3.258669  | 1.516014  |
| H | 0.117750  | 1.609680  | 1.041788  |
| C | -1.634544 | 2.412061  | 0.077419  |
| C | -2.608745 | 1.765054  | 1.073756  |
| C | -4.036055 | 1.521272  | 0.546348  |
| H | -4.472694 | 2.491763  | 0.262147  |
| H | -4.652975 | 1.152691  | 1.381143  |
| H | -2.685162 | 2.408444  | 1.964443  |
| H | -2.176984 | 0.818131  | 1.424309  |
| H | -1.574211 | 1.793234  | -0.829524 |
| H | -2.026932 | 3.389736  | -0.246199 |
| C | -4.225108 | 0.562821  | -0.648733 |
| H | -5.285147 | 0.621391  | -0.935787 |
| H | -3.661865 | 0.923833  | -1.520394 |
| C | -3.893717 | -0.936664 | -0.414578 |
| H | -4.481053 | -1.521909 | -1.137038 |
| H | -4.249913 | -1.237117 | 0.581015  |

Sum of electronic and zero-point Energies= -965.894501  
Sum of electronic and thermal Energies= -965.873684  
Sum of electronic and thermal Enthalpies= -965.872740  
Sum of electronic and thermal Free Energies= -965.943374

daec[n=2]-2-E2 (benzene)

|   |          |           |          |
|---|----------|-----------|----------|
| C | 1.735250 | -1.701271 | 0.537942 |
| H | 2.271444 | -1.794308 | 1.478372 |

|   |           |           |           |
|---|-----------|-----------|-----------|
| C | 2.433979  | -1.267192 | -0.604146 |
| C | 1.749065  | -1.190400 | -1.820391 |
| H | 2.276723  | -0.886553 | -2.722281 |
| C | 0.377305  | -1.462075 | -1.879915 |
| H | -0.174161 | -1.364408 | -2.812313 |
| C | -0.318423 | -1.828161 | -0.734893 |
| O | -1.687403 | -2.033060 | -0.790690 |
| C | 0.365904  | -1.986852 | 0.489237  |
| O | -0.389784 | -2.379281 | 1.547075  |
| C | 0.244189  | -2.519719 | 2.811114  |
| H | -0.540575 | -2.839245 | 3.502745  |
| H | 0.667874  | -1.566787 | 3.160218  |
| H | 1.035347  | -3.282824 | 2.784424  |
| C | -4.211902 | 1.221680  | -0.145643 |
| H | -4.889870 | 2.061529  | 0.000611  |
| C | -2.847608 | 1.367704  | 0.153955  |
| C | -2.323524 | 2.700819  | 0.681423  |
| H | -2.963319 | 3.004561  | 1.523248  |
| H | -2.480310 | 3.470907  | -0.091020 |
| C | -0.852955 | 2.737744  | 1.140656  |
| H | -0.664586 | 1.876937  | 1.799397  |
| H | -0.710386 | 3.626975  | 1.771281  |
| C | -2.004917 | 0.267685  | -0.041388 |
| H | -0.950753 | 0.344515  | 0.187631  |
| C | -2.498710 | -0.941112 | -0.543992 |
| C | -3.857849 | -1.085200 | -0.830379 |
| H | -4.227621 | -2.032386 | -1.214892 |
| C | -4.705978 | 0.005368  | -0.623325 |
| H | -5.766996 | -0.096589 | -0.845176 |
| C | 0.189688  | 2.760168  | 0.003482  |
| H | 0.218575  | 3.766546  | -0.442177 |
| H | -0.124820 | 2.088059  | -0.806043 |
| C | 1.600273  | 2.348871  | 0.459856  |
| C | 2.590799  | 2.198458  | -0.704797 |
| C | 4.013108  | 1.755051  | -0.309735 |
| H | 4.439054  | 2.514166  | 0.365310  |
| H | 4.643915  | 1.774195  | -1.212383 |
| H | 2.673395  | 3.163287  | -1.229453 |
| H | 2.171924  | 1.493989  | -1.435479 |
| H | 1.525780  | 1.393314  | 0.998844  |
| H | 1.987098  | 3.079964  | 1.188255  |
| C | 4.190899  | 0.381322  | 0.371475  |
| H | 5.241704  | 0.318227  | 0.689967  |
| H | 3.598753  | 0.335979  | 1.296314  |
| C | 3.896839  | -0.878297 | -0.486677 |
| H | 4.446352  | -1.719474 | -0.038364 |
| H | 4.320374  | -0.739396 | -1.491258 |

Sum of electronic and zero-point Energies= -965.894296  
Sum of electronic and thermal Energies= -965.873466  
Sum of electronic and thermal Enthalpies= -965.872522  
Sum of electronic and thermal Free Energies= -965.943421

daec[n=2]-3-TS (benzene)

|   |           |           |           |
|---|-----------|-----------|-----------|
| C | 3.207489  | 0.760896  | -0.045971 |
| H | 4.249041  | 1.057625  | -0.138640 |
| C | 2.171290  | 1.721308  | -0.116480 |
| C | 0.907505  | 1.214425  | 0.015630  |
| H | 0.115855  | 1.901233  | 0.013248  |
| C | 0.583628  | -0.109490 | 0.127050  |
| H | -0.462051 | -0.351468 | 0.127279  |
| C | 1.565668  | -1.070160 | 0.232543  |
| O | 1.226857  | -2.414256 | 0.413703  |
| C | 2.913897  | -0.617628 | 0.151509  |
| O | 3.863258  | -1.592470 | 0.259660  |
| C | 5.228972  | -1.220968 | 0.175977  |
| H | 5.797715  | -2.148504 | 0.292999  |
| H | 5.511328  | -0.521824 | 0.977218  |
| H | 5.470964  | -0.771270 | -0.798648 |
| C | -2.754961 | -2.685444 | -0.793392 |
| H | -3.765460 | -2.641780 | -1.196616 |

|   |           |           |           |
|---|-----------|-----------|-----------|
| C | -2.464274 | -2.030196 | 0.414766  |
| C | -3.497457 | -1.136372 | 1.104279  |
| H | -3.560003 | -1.427554 | 2.162888  |
| H | -4.488831 | -1.336365 | 0.674513  |
| C | -3.222495 | 0.409168  | 1.082134  |
| H | -2.166263 | 0.562726  | 1.332174  |
| H | -3.789021 | 0.848065  | 1.917026  |
| C | -1.153854 | -2.142383 | 0.917190  |
| H | -0.891391 | -1.655379 | 1.854192  |
| C | -0.124088 | -2.676115 | 0.123450  |
| C | -0.429103 | -3.332428 | -1.068103 |
| H | 0.373313  | -3.754543 | -1.667963 |
| C | -1.760468 | -3.373359 | -1.495711 |
| H | -2.010248 | -3.887118 | -2.422098 |
| C | -3.591097 | 1.189273  | -0.209214 |
| H | -4.684196 | 1.160353  | -0.331588 |
| H | -3.175803 | 0.663430  | -1.082687 |
| C | -3.117978 | 2.684008  | -0.289131 |
| C | -1.577615 | 2.715495  | -0.217456 |
| C | -0.648593 | 3.935967  | -0.546366 |
| H | -1.133307 | 4.850983  | -0.175996 |
| H | -0.573143 | 4.057432  | -1.636894 |
| H | -1.288976 | 1.895018  | -0.880965 |
| H | -1.339518 | 2.400648  | 0.805509  |
| H | -3.572815 | 3.276284  | 0.519167  |
| H | -3.488649 | 3.103028  | -1.236090 |
| C | 0.816936  | 3.992183  | 0.099504  |
| H | 0.705064  | 3.793073  | 1.176125  |
| H | 1.092772  | 5.053707  | 0.028455  |
| C | 2.131902  | 3.232596  | -0.385568 |
| H | 2.270121  | 3.412880  | -1.463957 |
| H | 2.970749  | 3.748476  | 0.104616  |

Sum of electronic and zero-point Energies= -965.815040  
Sum of electronic and thermal Energies= -965.795092  
Sum of electronic and thermal Enthalpies= -965.794148  
Sum of electronic and thermal Free Energies= -965.861838

daec[n=2]-3-E1 (benzene)

|   |           |           |           |
|---|-----------|-----------|-----------|
| C | -1.878744 | -1.583370 | 0.643946  |
| H | -2.346368 | -1.531033 | 1.622955  |
| C | -2.644109 | -1.267042 | -0.491141 |
| C | -2.049933 | -1.368636 | -1.754091 |
| H | -2.632077 | -1.157178 | -2.649133 |
| C | -0.693282 | -1.687016 | -1.873617 |
| H | -0.208904 | -1.730455 | -2.846596 |
| C | 0.078546  | -1.916723 | -0.740301 |
| O | 1.432447  | -2.177807 | -0.857360 |
| C | -0.520570 | -1.905953 | 0.537637  |
| O | 0.299040  | -2.187901 | 1.582804  |
| C | -0.241280 | -2.131541 | 2.896006  |
| H | 0.584575  | -2.383252 | 3.567495  |
| H | -1.052644 | -2.861054 | 3.031816  |
| H | -0.610656 | -1.124647 | 3.138775  |
| C | 4.161023  | 0.851362  | 0.009845  |
| H | 4.891418  | 1.624323  | 0.245006  |
| C | 2.845236  | 1.217002  | -0.316246 |
| C | 2.472778  | 2.694867  | -0.392893 |
| H | 2.913768  | 3.106445  | -1.314732 |
| H | 2.978355  | 3.223402  | -0.429389 |
| C | 0.974188  | 3.050151  | -0.378509 |
| H | 0.465644  | 2.512522  | -1.189784 |
| H | 0.876087  | 4.117200  | -0.628298 |
| C | 1.925577  | 0.201222  | -0.608569 |
| H | 0.903364  | 0.449170  | -0.869939 |
| C | 2.306822  | -1.144906 | -0.565757 |
| C | 3.621022  | -1.502112 | -0.257973 |
| H | 3.896604  | -2.553227 | -0.232028 |
| C | 4.542168  | -0.492509 | 0.026903  |
| H | 5.567314  | -0.760659 | 0.276876  |
| C | 0.269610  | 2.786209  | 0.963199  |

|   |           |           |           |
|---|-----------|-----------|-----------|
| H | 0.690388  | 3.466328  | 1.719829  |
| H | 0.507282  | 1.768963  | 1.306737  |
| C | -1.263749 | 2.943119  | 0.935942  |
| C | -1.969231 | 1.930988  | 0.013626  |
| C | -3.471002 | 1.757497  | 0.301836  |
| H | -3.958368 | 2.741787  | 0.223786  |
| H | -3.608587 | 1.440736  | 1.348457  |
| H | -1.466558 | 0.963207  | 0.114961  |
| H | -1.844486 | 2.229863  | -1.037584 |
| H | -1.535581 | 3.970935  | 0.647509  |
| H | -1.636339 | 2.810287  | 1.963610  |
| C | -4.219025 | 0.778661  | -0.629990 |
| H | -3.928330 | 0.976785  | -1.672608 |
| H | -5.295482 | 0.997076  | -0.570852 |
| C | -4.055864 | -0.736558 | -0.336170 |
| H | -4.413469 | -0.939872 | 0.683116  |
| H | -4.729936 | -1.280250 | -1.014418 |

Sum of electronic and zero-point Energies= -965.895544  
Sum of electronic and thermal Energies= -965.874647  
Sum of electronic and thermal Enthalpies= -965.873702  
Sum of electronic and thermal Free Energies= -965.944886

daec[n=2]-3-E2 (benzene)

|   |           |           |           |
|---|-----------|-----------|-----------|
| C | -1.989863 | -1.674985 | -0.470381 |
| H | -2.541586 | -1.780483 | -1.400415 |
| C | -2.642021 | -1.130801 | 0.650853  |
| C | -1.939765 | -1.029077 | 1.855377  |
| H | -2.434379 | -0.633334 | 2.740181  |
| C | -0.585351 | -1.374904 | 1.915914  |
| H | -0.016448 | -1.260494 | 2.835895  |
| C | 0.073211  | -1.837786 | 0.783799  |
| O | 1.424175  | -2.132738 | 0.841082  |
| C | -0.637359 | -2.030992 | -0.420897 |
| O | 0.080279  | -2.527038 | -1.461476 |
| C | -0.581360 | -2.715059 | -2.704931 |
| H | 0.173591  | -3.120877 | -3.384475 |
| H | -0.959480 | -1.765551 | -3.110825 |
| H | -1.411280 | -3.431001 | -2.617272 |
| C | 4.238833  | 0.828103  | 0.020644  |
| H | 4.994393  | 1.588393  | -0.172711 |
| C | 2.892211  | 1.097954  | -0.272100 |
| C | 2.521551  | 2.438638  | -0.901274 |
| H | 2.965262  | 2.466916  | -1.908817 |
| H | 3.030480  | 3.238370  | -0.341355 |
| C | 1.025587  | 2.781497  | -1.025215 |
| H | 0.507051  | 1.955153  | -1.529530 |
| H | 0.930219  | 3.643748  | -1.701942 |
| C | 1.940488  | 0.104110  | -0.008958 |
| H | 0.893520  | 0.283617  | -0.220716 |
| C | 2.322544  | -1.127369 | 0.537269  |
| C | 3.665672  | -1.395327 | 0.812449  |
| H | 3.942071  | -2.358404 | 1.234113  |
| C | 4.616776  | -0.408163 | 0.548873  |
| H | 5.665009  | -0.606116 | 0.766411  |
| C | 0.331620  | 3.121032  | 0.306047  |
| H | 0.762117  | 4.056334  | 0.695604  |
| H | 0.566023  | 2.348431  | 1.052374  |
| C | -1.201231 | 3.264191  | 0.220921  |
| C | -1.914556 | 1.959690  | -0.178012 |
| C | -3.426657 | 1.949282  | 0.106642  |
| H | -3.883100 | 2.820250  | -0.388993 |
| H | -3.597924 | 2.096350  | 1.185115  |
| H | -1.439778 | 1.130948  | 0.358047  |
| H | -1.757608 | 1.761120  | -1.248613 |
| H | -1.468835 | 4.070716  | -0.480295 |
| H | -1.568800 | 3.586532  | 1.207396  |
| C | -4.179455 | 0.685515  | -0.364367 |
| H | -3.869122 | 0.443601  | -1.392279 |
| H | -5.252341 | 0.920779  | -0.422770 |
| C | -4.049502 | -0.583039 | 0.519606  |

H -4.442239 -0.358750 1.521113  
H -4.710699 -1.353109 0.094351  
Sum of electronic and zero-point Energies= -965.895267  
Sum of electronic and thermal Energies= -965.874341  
Sum of electronic and thermal Enthalpies= -965.873397  
Sum of electronic and thermal Free Energies= -965.944870

daec[n=2]-4-TS (benzene)

C -3.111212 0.295044 0.053879  
H -4.175536 0.472608 0.185328  
C -2.212776 1.383336 0.112852  
C -0.877679 1.079806 -0.072098  
H -0.128776 1.840307 -0.070658  
C -0.428258 -0.208541 -0.243341  
H 0.632366 -0.332041 -0.309282  
C -1.281993 -1.292085 -0.309372  
O -0.800524 -2.591664 -0.497521  
C -2.668489 -1.029887 -0.169642  
O -3.490079 -2.114375 -0.250396  
C -4.887073 -1.914594 -0.106060  
H -5.341795 -2.904404 -0.210127  
H -5.286509 -1.250652 -0.886971  
H -5.140303 -1.504176 0.882816  
C 3.122997 -2.324427 0.823496  
H 4.093772 -2.111592 1.268402  
C 2.768770 -1.713013 -0.389859  
C 3.609883 -0.595888 -0.998459  
H 3.838960 -0.835729 -2.047610  
H 4.574962 -0.553721 -0.474632  
C 2.978978 0.840774 -0.997413  
H 2.059340 0.826921 -1.599186  
H 3.683513 1.477819 -1.553914  
C 1.522684 -2.043470 -0.947471  
H 1.220120 -1.604722 -1.895725  
C 0.558785 -2.708684 -0.177036  
C 0.918103 -3.322630 1.022238  
H 0.166208 -3.852430 1.601775  
C 2.229137 -3.171895 1.486734  
H 2.526688 -3.649532 2.418320  
C 2.709169 1.506021 0.375927  
H 3.592298 1.337081 1.011597  
H 1.881468 1.002258 0.892053  
C 2.478041 3.050002 0.354633  
C 1.171887 3.648858 -0.251420  
C -0.049998 3.834656 0.712490  
H 0.095668 4.781641 1.250246  
H -0.042436 3.064370 1.493799  
H 0.877166 3.063919 -1.133306  
H 1.418407 4.641959 -0.653238  
H 3.328588 3.492371 -0.185973  
H 2.573638 3.410988 1.389988  
C -1.452007 3.868761 -0.004268  
H -1.892385 4.863890 0.142443  
H -1.299370 3.774377 -1.089142  
C -2.548640 2.838400 0.415096  
H -3.486053 3.126633 -0.083410  
H -2.747022 2.946909 1.494314

Sum of electronic and zero-point Energies= -965.841413  
Sum of electronic and thermal Energies= -965.821705  
Sum of electronic and thermal Enthalpies= -965.820761  
Sum of electronic and thermal Free Energies= -965.887834

daec[n=2]-4-E1 (benzene)

C -1.762231 -1.993331 -0.487347  
H -2.308133 -2.101628 -1.420647  
C -2.445312 -1.529763 0.651375  
C -1.749476 -1.423669 1.859455  
H -2.267379 -1.090027 2.756370  
C -0.371256 -1.656240 1.901869  
H 0.195522 -1.511715 2.818865

C 0.315403 -2.012772 0.748702  
O 1.695549 -2.116203 0.773402  
C -0.385253 -2.243260 -0.454191  
O 0.364007 -2.642726 -1.514004  
C -0.289149 -2.846939 -2.759408  
H 0.491009 -3.171442 -3.453959  
H -0.744680 -1.919312 -3.135659  
H -1.058905 -3.628892 -2.688968  
C 3.974922 1.300828 0.067617  
H 4.592412 2.182353 -0.099068  
C 2.614448 1.331894 -0.279347  
C 2.054115 2.576949 -0.959338  
H 2.429325 2.579374 -1.995433  
H 2.509096 3.461664 -0.489104  
C 0.527003 2.779151 -1.017641  
H 0.052531 1.904353 -1.484181  
H 0.344199 3.614771 -1.710641  
C 1.839849 0.188184 -0.048101  
H 0.786301 0.188781 -0.302195  
C 2.412527 -0.962515 0.511297  
C 3.770768 -0.992789 0.836561  
H 4.194725 -1.895690 1.268652  
C 4.543737 0.147102 0.610988  
H 5.600878 0.135197 0.870895  
C -0.150658 3.107404 0.324621  
H 0.445483 3.879578 0.835068  
H -0.124841 2.230116 0.985297  
C -1.594070 3.642312 0.192872  
C -2.636472 2.680019 -0.413168  
C -2.943612 1.458612 0.466480  
H -3.413589 1.789699 1.406318  
H -1.996690 0.989660 0.756775  
H -2.288866 2.335798 -1.399140  
H -3.564085 3.241231 -0.603866  
H -1.566874 4.557013 -0.419629  
H -1.941094 3.957994 1.189029  
C -3.830093 0.399690 -0.211772  
H -4.862356 0.769014 -0.303193  
H -3.470102 0.239197 -1.239196  
C -3.848205 -0.974255 0.513271  
H -4.490563 -1.662875 -0.054087  
H -4.301673 -0.862453 1.507728

Sum of electronic and zero-point Energies= -965.894720  
Sum of electronic and thermal Energies= -965.873850  
Sum of electronic and thermal Enthalpies= -965.872906  
Sum of electronic and thermal Free Energies= -965.944430

daec[n=2]-4-E2 (benzene)

C -1.628151 -1.934028 0.615430  
H -2.092066 -1.916192 1.597481  
C -2.421072 -1.669342 -0.514127  
C -1.830966 -1.728212 -1.781566  
H -2.433576 -1.557299 -2.671832  
C -0.450990 -1.922339 -1.909049  
H 0.032178 -1.907083 -2.883506  
C 0.343455 -2.067203 -0.778072  
O 1.722299 -2.116842 -0.887926  
C -0.248629 -2.135202 0.500890  
O 0.599137 -2.343162 1.540920  
C 0.060852 -2.344130 2.855939  
H 0.908046 -2.526023 3.523417  
H -0.682087 -3.143846 2.988549  
H -0.395671 -1.375767 3.106723  
C 3.852679 1.327015 0.105995  
H 4.428519 2.211730 0.373848  
C 2.533434 1.471692 -0.352381  
C 1.961056 2.870027 -0.556864  
H 2.310006 3.229912 -1.538440  
H 2.425005 3.544155 0.178154  
C 0.431469 3.061818 -0.508767

|   |           |           |           |
|---|-----------|-----------|-----------|
| H | -0.050391 | 2.414165  | -1.254369 |
| H | 0.228421  | 4.091425  | -0.841434 |
| C | 1.813152  | 0.316138  | -0.682643 |
| H | 0.794023  | 0.396340  | -1.045145 |
| C | 2.396737  | -0.951177 | -0.556991 |
| C | 3.716214  | -1.087030 | -0.121419 |
| H | 4.148216  | -2.080323 | -0.031252 |
| C | 4.436846  | 0.061998  | 0.207878  |
| H | 5.462549  | -0.033249 | 0.560214  |
| C | -0.213544 | 2.859857  | 0.872965  |
| H | 0.378657  | 3.413909  | 1.617777  |
| H | -0.144625 | 1.803603  | 1.167401  |
| C | -1.673384 | 3.355269  | 0.973077  |
| C | -2.712596 | 2.639390  | 0.085453  |
| C | -2.944439 | 1.167952  | 0.459903  |
| H | -3.352914 | 1.107826  | 1.481745  |
| H | -1.973805 | 0.660749  | 0.495315  |
| H | -2.400242 | 2.697495  | -0.968207 |
| H | -3.663497 | 3.190828  | 0.145427  |
| H | -1.689591 | 4.429341  | 0.730894  |
| H | -1.995103 | 3.279837  | 0.203549  |
| C | -3.863042 | 0.405363  | -0.510315 |
| H | -4.901185 | 0.753600  | -0.402632 |
| H | -3.565132 | 0.640294  | -1.543050 |
| C | -3.829709 | -1.139065 | -0.340144 |
| H | -4.508711 | -1.587948 | -1.078563 |
| H | -4.214736 | -1.410195 | 0.652833  |

Sum of electronic and zero-point Energies= -965.894979  
Sum of electronic and thermal Energies= -965.874173  
Sum of electronic and thermal Enthalpies= -965.873229  
Sum of electronic and thermal Free Energies= -965.944170

#### daec[n=2]-5-TS (benzene)

|   |           |           |           |
|---|-----------|-----------|-----------|
| C | -2.943106 | -1.116624 | 0.049643  |
| H | -3.958161 | -1.467497 | 0.217221  |
| C | -2.678114 | 0.270164  | 0.059623  |
| C | -1.367884 | 0.647981  | -0.166827 |
| H | -1.098321 | 1.681141  | -0.214852 |
| C | -0.349970 | -0.270137 | -0.328334 |
| H | 0.645250  | 0.119285  | -0.418529 |
| C | -0.584841 | -1.631679 | -0.349239 |
| O | 0.437653  | -2.562102 | -0.533568 |
| C | -1.922927 | -2.067100 | -0.169943 |
| O | -2.118030 | -3.415159 | -0.207702 |
| C | -3.433542 | -3.910489 | -0.016342 |
| H | -3.355807 | -4.999254 | -0.092295 |
| H | -4.123700 | -3.543576 | -0.790408 |
| H | -3.828329 | -3.645843 | 0.975914  |
| C | 4.008188  | -0.846499 | 0.747127  |
| H | 4.862024  | -0.324634 | 1.177066  |
| C | 3.367371  | -0.312999 | -0.384894 |
| C | 3.678238  | 1.101042  | -0.860946 |
| H | 3.423808  | 1.214623  | -1.923698 |
| H | 4.758181  | 1.280919  | -0.777286 |
| C | 2.927357  | 2.194779  | -0.012753 |
| H | 3.612693  | 3.038393  | 0.148971  |
| H | 2.735640  | 1.775420  | 0.984639  |
| C | 2.298803  | -1.036246 | -0.933233 |
| H | 1.824142  | -0.686033 | -1.845819 |
| C | 1.715366  | -2.094131 | -0.217567 |
| C | 2.355865  | -2.618946 | 0.903455  |
| H | 1.906844  | -3.454059 | 1.435063  |
| C | 3.538710  | -2.016847 | 1.348230  |
| H | 4.054887  | -2.425461 | 2.214965  |
| C | 1.599099  | 2.748532  | -0.597396 |
| H | 1.085849  | 1.964104  | -1.168991 |
| H | 1.826927  | 3.537657  | -1.330093 |
| C | 0.620961  | 3.292882  | 0.476439  |
| C | -0.744287 | 3.817885  | -0.079718 |
| C | -2.027281 | 3.462147  | 0.762772  |

|   |           |          |           |
|---|-----------|----------|-----------|
| H | -2.391869 | 4.382001 | 1.237747  |
| H | -1.744608 | 2.804521 | 1.595367  |
| H | -0.876050 | 3.441921 | -1.104253 |
| H | -0.684820 | 4.908612 | -0.192651 |
| H | 1.117504  | 4.088501 | 1.051166  |
| H | 0.433978  | 2.484951 | 1.197747  |
| C | -3.224310 | 2.815391 | -0.028646 |
| H | -4.106284 | 3.458127 | 0.092975  |
| H | -2.998142 | 2.831166 | -1.104569 |
| C | -3.684910 | 1.374718 | 0.351399  |
| H | -3.941476 | 1.355275 | 1.423619  |
| H | -4.629860 | 1.174889 | -0.175942 |

Sum of electronic and zero-point Energies= -965.845558  
Sum of electronic and thermal Energies= -965.825674  
Sum of electronic and thermal Enthalpies= -965.824730  
Sum of electronic and thermal Free Energies= -965.892391

#### daec[n=2]-5-E1 (benzene)

|   |           |           |           |
|---|-----------|-----------|-----------|
| C | -1.947244 | -1.634659 | -0.434260 |
| H | -2.434710 | -1.815040 | -1.388571 |
| C | -2.695078 | -1.072001 | 0.617709  |
| C | -2.069785 | -0.873415 | 1.851968  |
| H | -2.635504 | -0.464305 | 2.686565  |
| C | -0.712359 | -1.177228 | 2.021755  |
| H | -0.214699 | -1.012195 | 2.974742  |
| C | 0.033159  | -1.677939 | 0.963422  |
| O | 1.373536  | -1.979837 | 1.129413  |
| C | -0.589971 | -1.934845 | -0.280202 |
| O | 0.209247  | -2.457537 | -1.245240 |
| C | -0.352639 | -2.694445 | -2.528607 |
| H | 0.460528  | -3.098035 | -3.138713 |
| H | -0.721651 | -1.765220 | -2.986309 |
| H | -1.169519 | -3.429115 | -2.483474 |
| C | 4.267090  | 0.627469  | -0.351632 |
| H | 5.038751  | 1.289296  | -0.742902 |
| C | 3.013028  | 1.155972  | -0.002680 |
| C | 2.764694  | 2.653912  | -0.167727 |
| H | 2.955731  | 2.923782  | -1.218552 |
| H | 3.533823  | 3.188590  | 0.410022  |
| C | 1.380802  | 3.184301  | 0.247388  |
| H | 1.434738  | 4.280373  | 0.312921  |
| H | 1.158746  | 2.839400  | 1.268037  |
| C | 2.041813  | 0.280206  | 0.500339  |
| H | 1.067893  | 0.649839  | 0.798281  |
| C | 2.306776  | -1.088270 | 0.627486  |
| C | 3.558267  | -1.605321 | 0.291284  |
| H | 3.743866  | -2.670551 | 0.401529  |
| C | 4.535472  | -0.733731 | -0.194912 |
| H | 5.514589  | -1.126301 | -0.464212 |
| C | 0.230730  | 2.779789  | -0.696755 |
| H | 0.395319  | 1.750321  | -1.041647 |
| H | 0.262728  | 3.402859  | -1.603446 |
| C | -1.165072 | 2.851373  | -0.048576 |
| C | -2.204871 | 1.998111  | -0.789495 |
| C | -3.560255 | 1.853885  | -0.067802 |
| H | -4.167654 | 2.752142  | -0.249125 |
| H | -3.394333 | 1.821506  | 1.019595  |
| H | -1.772728 | 0.999615  | -0.928793 |
| H | -2.372775 | 2.396008  | -1.802857 |
| H | -1.500787 | 3.896853  | 0.034571  |
| H | -1.092227 | 2.474954  | 0.983518  |
| C | -4.350746 | 0.595032  | -0.496860 |
| H | -5.429120 | 0.807907  | -0.491529 |
| H | -4.100570 | 0.346306  | -1.539020 |
| C | -4.137973 | -0.654104 | 0.400514  |
| H | -4.593352 | -0.455585 | 1.380504  |
| H | -4.704387 | -1.488957 | -0.038662 |

Sum of electronic and zero-point Energies= -965.893053  
Sum of electronic and thermal Energies= -965.872076  
Sum of electronic and thermal Enthalpies= -965.871131

Sum of electronic and thermal Free Energies= -965.942600

daec[n=2]-5-E2 (benzene)

|   |           |           |           |
|---|-----------|-----------|-----------|
| C | -1.961826 | -1.411569 | 0.739327  |
| H | -2.478946 | -1.289966 | 1.686710  |
| C | -2.678935 | -1.220904 | -0.453849 |
| C | -2.016781 | -1.414705 | -1.672877 |
| H | -2.556177 | -1.296135 | -2.610834 |
| C | -0.655339 | -1.730176 | -1.695633 |
| H | -0.125425 | -1.862965 | -2.636194 |
| C | 0.059033  | -1.873718 | -0.509795 |
| O | 1.402153  | -2.206531 | -0.553755 |
| C | -0.599313 | -1.742255 | 0.729518  |
| O | 0.165762  | -1.930893 | 1.835824  |
| C | -0.444840 | -1.778532 | 3.110010  |
| H | 0.345577  | -1.967181 | 3.842046  |
| H | -1.256816 | -2.504693 | 3.259227  |
| H | -0.834706 | -0.760220 | 3.253020  |
| C | 4.344560  | 0.737657  | -0.390351 |
| H | 5.132800  | 1.488865  | -0.364597 |
| C | 3.025143  | 1.106222  | -0.081576 |
| C | 2.723399  | 2.559517  | 0.278542  |
| H | 2.873984  | 3.182261  | -0.618310 |
| H | 3.492249  | 2.892378  | 0.990845  |
| C | 1.333858  | 2.858216  | 0.872258  |
| H | 1.376484  | 3.826294  | 1.391456  |
| H | 1.116559  | 2.113195  | 1.651820  |
| C | 2.033251  | 0.116552  | -0.116201 |
| H | 1.007362  | 0.360353  | 0.127104  |
| C | 2.345536  | -1.200833 | -0.469315 |
| C | 3.661595  | -1.562664 | -0.766887 |
| H | 3.884806  | -2.592573 | -1.033622 |
| C | 4.655073  | -0.583165 | -0.721262 |
| H | 5.683665  | -0.855692 | -0.951504 |
| C | 0.182972  | 2.882003  | -0.155292 |
| H | 0.349837  | 2.098544  | -0.906144 |
| H | 0.208824  | 3.830221  | -0.713121 |
| C | -1.210053 | 2.667107  | 0.468180  |
| C | -2.244308 | 2.145926  | -0.540326 |
| C | -3.595713 | 1.738067  | 0.081441  |
| H | -4.209424 | 2.636652  | 0.238550  |
| H | -3.425765 | 1.317303  | 1.084434  |
| H | -1.808032 | 1.275400  | -1.045438 |
| H | -2.417781 | 2.893596  | -1.330154 |
| H | -1.564317 | 3.591262  | 0.950869  |
| H | -1.122392 | 1.922227  | 1.274492  |
| C | -4.384310 | 0.713922  | -0.767207 |
| H | -5.463950 | 0.885959  | -0.651992 |
| H | -4.165536 | 0.876985  | -1.832860 |
| C | -4.128906 | -0.774675 | -0.408512 |
| H | -4.525934 | -0.958887 | 0.599579  |
| H | -4.724827 | -1.395755 | -1.093103 |

Sum of electronic and zero-point Energies= -965.892669

Sum of electronic and thermal Energies= -965.871660

Sum of electronic and thermal Enthalpies= -965.870716

Sum of electronic and thermal Free Energies= -965.942370

daec[n=2]-6-TS (benzene)

|   |           |           |           |
|---|-----------|-----------|-----------|
| C | -3.144855 | -0.307405 | 0.057069  |
| H | -4.227801 | -0.340188 | 0.145291  |
| C | -2.475530 | 0.930731  | 0.181416  |
| C | -1.100767 | 0.894799  | 0.048810  |
| H | -0.517061 | 1.788733  | 0.097575  |
| C | -0.410216 | -0.280694 | -0.132413 |
| H | 0.655611  | -0.212674 | -0.163224 |
| C | -1.033944 | -1.502717 | -0.267900 |
| O | -0.292090 | -2.669141 | -0.479465 |
| C | -2.448857 | -1.517136 | -0.181456 |
| O | -3.044355 | -2.734302 | -0.327957 |
| C | -4.458477 | -2.808249 | -0.243273 |

|   |           |           |           |
|---|-----------|-----------|-----------|
| H | -4.711178 | -3.862140 | -0.394075 |
| H | -4.945194 | -2.205622 | -1.024359 |
| H | -4.825290 | -2.487725 | 0.743185  |
| C | 3.570290  | -1.756708 | 0.789495  |
| H | 4.516219  | -1.420228 | 1.211685  |
| C | 3.084077  | -1.162752 | -0.388877 |
| C | 3.748799  | 0.069097  | -0.995973 |
| H | 3.420895  | 0.173491  | -2.039865 |
| H | 4.837655  | -0.080650 | -1.026834 |
| C | 3.499573  | 1.437187  | -0.267634 |
| H | 4.100898  | 2.184079  | -0.808359 |
| H | 3.919161  | 1.386708  | 0.747819  |
| C | 1.883536  | -1.658892 | -0.920933 |
| H | 1.490589  | -1.239119 | -1.844112 |
| C | 1.067832  | -2.522078 | -0.169626 |
| C | 1.559162  | -3.107846 | 0.994384  |
| H | 0.927863  | -3.785635 | 1.563585  |
| C | 2.840173  | -2.754809 | 1.439220  |
| H | 3.237781  | -3.214387 | 2.342170  |
| C | 2.027810  | 1.910898  | -0.204980 |
| H | 1.514758  | 1.312937  | 0.553233  |
| H | 1.551821  | 1.675107  | -1.168535 |
| C | 1.767445  | 3.412726  | 0.093756  |
| C | 0.339289  | 3.929565  | -0.288931 |
| C | -0.852085 | 3.820979  | 0.732544  |
| H | -0.920438 | 4.776882  | 1.268832  |
| H | -0.635948 | 3.082410  | 1.513562  |
| H | 0.053392  | 3.431735  | -1.226583 |
| H | 0.436634  | 4.991316  | -0.554650 |
| H | 2.487493  | 4.006450  | -0.489390 |
| H | 1.984476  | 3.633728  | 1.149797  |
| C | -2.251312 | 3.527517  | 0.062228  |
| H | -2.895922 | 4.402207  | 0.221555  |
| H | -2.113017 | 3.463014  | -1.026344 |
| C | -3.093357 | 2.286275  | 0.503887  |
| H | -4.083609 | 2.376652  | 0.033557  |
| H | -3.279742 | 2.347530  | 1.588976  |

Sum of electronic and zero-point Energies= -965.840805

Sum of electronic and thermal Energies= -965.820966

Sum of electronic and thermal Enthalpies= -965.820022

Sum of electronic and thermal Free Energies= -965.887500

daec[n=2]-6-E1 (benzene)

|   |           |           |           |
|---|-----------|-----------|-----------|
| C | -2.080958 | -1.746403 | -0.385182 |
| H | -2.758327 | -1.788866 | -1.233772 |
| C | -2.544249 | -1.208173 | 0.828384  |
| C | -1.676354 | -1.178973 | 1.924756  |
| H | -2.021227 | -0.786615 | 2.879373  |
| C | -0.346740 | -1.585689 | 1.784298  |
| H | 0.349501  | -1.518745 | 2.617301  |
| C | 0.128574  | -2.033346 | 0.556908  |
| O | 1.471877  | -2.344103 | 0.402595  |
| C | -0.752125 | -2.163606 | -0.537075 |
| O | -0.212752 | -2.647297 | -1.687342 |
| C | -1.059911 | -2.783403 | -2.819791 |
| H | -0.430733 | -3.197659 | -3.612959 |
| H | -1.460608 | -1.812757 | -3.146943 |
| H | -1.893032 | -3.473194 | -2.621668 |
| C | 4.092549  | 0.899191  | 0.332769  |
| H | 4.783804  | 1.740447  | 0.337652  |
| C | 2.881303  | 1.003430  | -0.369530 |
| C | 2.532561  | 2.276203  | -1.123494 |
| H | 2.210090  | 2.020429  | -2.144317 |
| H | 3.448941  | 2.871244  | -1.233572 |
| C | 1.444879  | 3.176930  | -0.479952 |
| H | 1.500451  | 4.162552  | -0.966880 |
| H | 1.689261  | 3.343333  | 0.579852  |
| C | 2.014561  | -0.099675 | -0.364742 |
| H | 1.085835  | -0.064588 | -0.925394 |
| C | 2.331754  | -1.257180 | 0.353639  |

|   |           |           |           |
|---|-----------|-----------|-----------|
| C | 3.546872  | -1.360870 | 1.034452  |
| H | 3.779949  | -2.274775 | 1.575101  |
| C | 4.425422  | -0.275822 | 1.012636  |
| H | 5.373837  | -0.344302 | 1.542560  |
| C | 0.012180  | 2.639108  | -0.609933 |
| H | -0.056443 | 1.674204  | -0.093610 |
| H | -0.192552 | 2.432452  | -1.673386 |
| C | -1.081028 | 3.582293  | -0.076440 |
| C | -2.505787 | 3.012381  | -0.250316 |
| C | -2.809314 | 1.820665  | 0.680733  |
| H | -3.102211 | 2.192096  | 1.674984  |
| H | -1.883426 | 1.257525  | 0.838587  |
| H | -2.623932 | 2.695713  | -1.298745 |
| H | -3.245525 | 3.810905  | -0.093137 |
| H | -1.011443 | 4.546528  | -0.602760 |
| H | -0.896864 | 3.801040  | 0.987389  |
| C | -3.874918 | 0.843700  | 0.153979  |
| H | -4.876410 | 1.295687  | 0.209783  |
| H | -3.683646 | 0.653445  | -0.912790 |
| C | -3.896092 | -0.523587 | 0.890392  |
| H | -4.673798 | -1.154256 | 0.436178  |
| H | -4.183559 | -0.373678 | 1.940208  |

Sum of electronic and zero-point Energies= -965.894557  
Sum of electronic and thermal Energies= -965.873586  
Sum of electronic and thermal Enthalpies= -965.872642  
Sum of electronic and thermal Free Energies= -965.944314

#### daec[n=2]-6-E2 (benzene)

|   |           |           |           |
|---|-----------|-----------|-----------|
| C | -1.645080 | -1.875852 | 0.631048  |
| H | -2.050910 | -1.896016 | 1.638463  |
| C | -2.503793 | -1.574935 | -0.440083 |
| C | -1.984996 | -1.584953 | -1.739740 |
| H | -2.636535 | -1.382301 | -2.587914 |
| C | -0.616279 | -1.785854 | -1.955001 |
| H | -0.192910 | -1.747907 | -2.956286 |
| C | 0.242550  | -1.986079 | -0.880381 |
| O | 1.609695  | -2.088467 | -1.078605 |
| C | -0.277430 | -2.087514 | 0.428374  |
| O | 0.624673  | -2.351616 | 1.408878  |
| C | 0.167441  | -2.383769 | 2.753749  |
| H | 1.050859  | -2.597604 | 3.362208  |
| H | -0.578530 | -3.176562 | 2.908941  |
| H | -0.257257 | -1.416906 | 3.060109  |
| C | 3.911574  | 1.131510  | 0.239939  |
| H | 4.523656  | 1.958256  | 0.597005  |
| C | 2.686287  | 1.399653  | -0.389145 |
| C | 2.214199  | 2.831736  | -0.582407 |
| H | 1.922719  | 2.982478  | -1.633137 |
| H | 3.067704  | 3.499622  | -0.404945 |
| C | 1.040012  | 3.297699  | 0.319134  |
| H | 1.002021  | 4.396759  | 0.271050  |
| H | 1.260847  | 3.043248  | 1.366614  |
| C | 1.924142  | 0.312825  | -0.846658 |
| H | 0.987144  | 0.485560  | -1.366733 |
| C | 2.358365  | -1.000673 | -0.646149 |
| C | 3.586885  | -1.259851 | -0.035572 |
| H | 3.906622  | -2.289329 | 0.102735  |
| C | 4.360514  | -0.183420 | 0.400050  |
| H | 5.318644  | -0.372641 | 0.881062  |
| C | -0.332475 | 2.735769  | -0.080067 |
| H | -0.310475 | 1.643174  | 0.007602  |
| H | -0.507019 | 2.953237  | -1.146583 |
| C | -1.518463 | 3.287771  | 0.731003  |
| C | -2.877705 | 2.713249  | 0.275129  |
| C | -3.067275 | 1.224829  | 0.633112  |
| H | -3.405304 | 1.134888  | 1.677356  |
| H | -2.090243 | 0.731892  | 0.595675  |
| H | -2.954868 | 2.838166  | -0.816409 |
| H | -3.695044 | 3.310897  | 0.704431  |
| H | -1.540080 | 4.384108  | 0.635566  |

|   |           |           |           |
|---|-----------|-----------|-----------|
| H | -1.367290 | 3.077677  | 1.801913  |
| C | -4.022203 | 0.452443  | -0.293470 |
| H | -5.064698 | 0.754726  | -0.113469 |
| H | -3.799016 | 0.723133  | -1.336129 |
| C | -3.915435 | -1.092081 | -0.166287 |
| H | -4.622915 | -1.550313 | -0.871672 |
| H | -4.227091 | -1.402595 | 0.840897  |

Sum of electronic and zero-point Energies= -965.895139  
Sum of electronic and thermal Energies= -965.874199  
Sum of electronic and thermal Enthalpies= -965.873255  
Sum of electronic and thermal Free Energies= -965.944597

#### daec[n=2]-7-TS (benzene)

|   |           |           |           |
|---|-----------|-----------|-----------|
| C | 0.469725  | 3.125751  | -0.174353 |
| H | 0.657394  | 4.193156  | -0.282090 |
| C | 1.520620  | 2.189613  | -0.202291 |
| C | 1.146893  | 0.865461  | -0.039168 |
| H | 1.879486  | 0.087142  | -0.012410 |
| C | -0.163372 | 0.468648  | 0.074653  |
| H | -0.337846 | -0.586271 | 0.120487  |
| C | -1.213055 | 1.373166  | 0.105474  |
| O | -2.538111 | 0.937018  | 0.233390  |
| C | -0.880799 | 2.743305  | -0.010295 |
| O | -1.828937 | 3.735303  | -0.044894 |
| C | -2.659515 | 3.850441  | 1.113411  |
| H | -3.300771 | 4.721019  | 0.940176  |
| H | -2.053048 | 4.022927  | 2.015325  |
| H | -3.283861 | 2.960938  | 1.257896  |
| C | -2.362077 | -3.035592 | -0.948042 |
| H | -2.166476 | -4.028314 | -1.350383 |
| C | -1.801159 | -2.667011 | 0.285332  |
| C | -0.773174 | -3.549494 | 0.989390  |
| H | -0.628244 | -4.462426 | 0.395552  |
| H | -1.177647 | -3.879702 | 1.958590  |
| C | 0.616487  | -2.900490 | 1.292943  |
| H | 1.136417  | -3.588335 | 1.976813  |
| H | 0.452249  | -1.984006 | 1.878081  |
| C | -2.104216 | -1.388513 | 0.781785  |
| H | -1.697446 | -1.065636 | 1.737165  |
| C | -2.692529 | -0.428881 | -0.052469 |
| C | -3.256020 | -0.800958 | -1.271568 |
| H | -3.721174 | -0.048492 | -1.903401 |
| C | -3.134245 | -2.131874 | -1.685357 |
| H | -3.570609 | -2.441205 | -2.633098 |
| C | 1.588890  | -2.571911 | 0.127592  |
| H | 1.107643  | -1.910415 | -0.603730 |
| H | 1.829533  | -3.494983 | -0.421842 |
| C | 2.907995  | -1.944741 | 0.666544  |
| C | 3.977480  | -1.409517 | -0.339066 |
| C | 3.865155  | -0.003573 | -1.012447 |
| H | 2.981749  | 0.037227  | -1.660165 |
| H | 4.718234  | 0.063622  | -1.703029 |
| H | 4.089145  | -2.147898 | -1.147745 |
| H | 4.936611  | -1.423306 | 0.200794  |
| H | 3.409354  | -2.725582 | 1.258263  |
| H | 2.661909  | -1.160660 | 1.396976  |
| C | 3.916724  | 1.239249  | -0.059317 |
| H | 4.952781  | 1.602213  | -0.025659 |
| H | 3.684115  | 0.932186  | 0.970262  |
| C | 3.007427  | 2.456642  | -0.411132 |
| H | 3.327929  | 3.315469  | 0.196670  |
| H | 3.185552  | 2.754437  | -1.457189 |

Sum of electronic and zero-point Energies= -965.843005  
Sum of electronic and thermal Energies= -965.823177  
Sum of electronic and thermal Enthalpies= -965.822232  
Sum of electronic and thermal Free Energies= -965.889867

#### daec[n=2]-7-E1 (benzene)

|   |           |           |           |
|---|-----------|-----------|-----------|
| C | -1.378768 | -2.063389 | -0.620040 |
| H | -1.805568 | -2.212676 | -1.609778 |

|   |           |           |           |
|---|-----------|-----------|-----------|
| C | -2.204921 | -1.819331 | 0.485555  |
| C | -1.601744 | -1.675626 | 1.744612  |
| H | -2.221319 | -1.517658 | 2.625937  |
| C | -0.211785 | -1.675650 | 1.875566  |
| H | 0.262775  | -1.513249 | 2.840803  |
| C | 0.597327  | -1.824819 | 0.749760  |
| O | 1.973502  | -1.703730 | 0.866156  |
| C | 0.014752  | -2.068332 | -0.506464 |
| O | 0.766281  | -2.207847 | -1.642894 |
| C | 1.609705  | -3.363707 | -1.692705 |
| H | 2.127856  | -3.318284 | -2.655787 |
| H | 1.009997  | -4.284718 | -1.646141 |
| H | 2.346222  | -3.365682 | -0.880889 |
| C | 3.752865  | 1.911385  | -0.202971 |
| H | 4.242284  | 2.844282  | -0.479374 |
| C | 2.366138  | 1.896147  | 0.021439  |
| C | 1.576860  | 3.192820  | -0.127567 |
| H | 1.563989  | 3.474463  | -1.192954 |
| H | 2.156419  | 3.984854  | 0.368355  |
| C | 0.132777  | 3.234005  | 0.414632  |
| H | -0.117871 | 4.286454  | 0.613690  |
| H | 0.091925  | 2.731140  | 1.392488  |
| C | 1.764036  | 0.685017  | 0.382560  |
| H | 0.699200  | 0.643317  | 0.575572  |
| C | 2.525860  | -0.483937 | 0.501598  |
| C | 3.904589  | -0.462233 | 0.286760  |
| H | 4.479399  | -1.378568 | 0.395057  |
| C | 4.509249  | 0.746187  | -0.065788 |
| H | 5.584098  | 0.775267  | -0.236021 |
| C | -0.950792 | 2.658019  | -0.515561 |
| H | -0.719872 | 1.614709  | -0.767035 |
| H | -0.929089 | 3.208159  | -1.469855 |
| C | -2.361436 | 2.756676  | 0.092031  |
| C | -3.492920 | 2.203198  | -0.798770 |
| C | -3.516254 | 0.668825  | -0.949991 |
| H | -2.505638 | 0.318917  | -1.196593 |
| H | -4.143948 | 0.399668  | -1.812854 |
| H | -3.407691 | 2.659258  | -1.796882 |
| H | -4.461190 | 2.539073  | -0.396227 |
| H | -2.574074 | 3.814572  | 0.310532  |
| H | -2.370950 | 2.245085  | 1.066794  |
| C | -4.038446 | -0.079811 | 0.289816  |
| H | -5.130952 | 0.035776  | 0.348964  |
| H | -3.633387 | 0.376628  | 1.204084  |
| C | -3.692788 | -1.591781 | 0.315471  |
| H | -4.240858 | -2.063561 | 1.143000  |
| H | -4.045856 | -2.066598 | -0.610654 |

Sum of electronic and zero-point Energies= -965.893865  
Sum of electronic and thermal Energies= -965.872795  
Sum of electronic and thermal Enthalpies= -965.871851  
Sum of electronic and thermal Free Energies= -965.943629

#### daec[n=2]-7-E2 (benzene)

|   |           |           |           |
|---|-----------|-----------|-----------|
| C | -1.495032 | -2.085572 | 0.670548  |
| H | -2.005485 | -2.232282 | 1.620701  |
| C | -2.219409 | -1.799411 | -0.492147 |
| C | -1.514206 | -1.662697 | -1.697922 |
| H | -2.053476 | -1.477935 | -2.624831 |
| C | -0.121103 | -1.708305 | -1.706836 |
| H | 0.439408  | -1.546081 | -2.624938 |
| C | 0.593234  | -1.902490 | -0.523496 |
| O | 1.979199  | -1.807763 | -0.552279 |
| C | -0.094102 | -2.149668 | 0.679222  |
| O | 0.493892  | -2.365855 | 1.889163  |
| C | 1.704947  | -3.125387 | 1.961778  |
| H | 1.747046  | -3.511041 | 2.986240  |
| H | 2.588218  | -2.507200 | 1.770035  |
| H | 1.690005  | -3.968115 | 1.258712  |
| C | 3.716865  | 1.977595  | -0.413133 |
| H | 4.193038  | 2.956869  | -0.389721 |

|   |           |           |           |
|---|-----------|-----------|-----------|
| C | 2.384758  | 1.844995  | 0.014247  |
| C | 1.644361  | 3.080774  | 0.515662  |
| H | 1.577247  | 3.806272  | -0.310892 |
| H | 2.288885  | 3.563794  | 1.265061  |
| C | 0.243544  | 2.896866  | 1.132011  |
| H | 0.033815  | 3.786665  | 1.744005  |
| H | 0.257940  | 2.052040  | 1.836762  |
| C | 1.797108  | 0.575130  | -0.022967 |
| H | 0.775279  | 0.437705  | 0.308996  |
| C | 2.518670  | -0.531733 | -0.489013 |
| C | 3.845296  | -0.397101 | -0.901757 |
| H | 4.386354  | -1.270188 | -1.257750 |
| C | 4.436562  | 0.867565  | -0.857715 |
| H | 5.469600  | 0.985407  | -1.180259 |
| C | -0.915887 | 2.723744  | 0.133983  |
| H | -0.738101 | 1.849202  | -0.505384 |
| H | -0.937489 | 3.592731  | -0.543055 |
| C | -2.278787 | 2.597115  | 0.837882  |
| C | -3.484641 | 2.406485  | -0.105052 |
| C | -3.565867 | 1.029451  | -0.793977 |
| H | -2.589226 | 0.791037  | -1.234630 |
| H | -4.268257 | 1.088976  | -1.639147 |
| H | -3.454762 | 3.191154  | -0.876486 |
| H | -4.412135 | 2.578400  | 0.462890  |
| H | -2.445331 | 3.503467  | 1.440220  |
| H | -2.235428 | 1.766384  | 1.558621  |
| C | -4.009307 | -0.115697 | 0.134589  |
| H | -5.089290 | -0.029811 | 0.326250  |
| H | -3.517318 | -0.019541 | 1.112692  |
| C | -3.709041 | -1.534308 | -0.414499 |
| H | -4.189919 | -2.273613 | 0.241159  |
| H | -4.163135 | -1.649453 | -1.408751 |

Sum of electronic and zero-point Energies= -965.893954  
Sum of electronic and thermal Energies= -965.872888  
Sum of electronic and thermal Enthalpies= -965.871944  
Sum of electronic and thermal Free Energies= -965.944086

#### daec[n=3]-1-TS (benzene)

|   |           |           |           |
|---|-----------|-----------|-----------|
| C | 2.964639  | 1.349769  | 0.042967  |
| H | 3.956895  | 1.718946  | -0.202740 |
| C | 2.765731  | -0.036896 | 0.191203  |
| C | 1.478683  | -0.455462 | 0.498234  |
| H | 1.252400  | -1.497119 | 0.634093  |
| C | 0.423174  | 0.432596  | 0.605727  |
| H | -0.549725 | 0.013359  | 0.790699  |
| C | 0.596391  | 1.797733  | 0.434945  |
| O | -0.452130 | 2.713472  | 0.491058  |
| C | 1.904852  | 2.270236  | 0.168996  |
| O | 2.030909  | 3.618409  | 0.020476  |
| C | 3.318375  | 4.147545  | -0.254084 |
| H | 3.187192  | 5.232100  | -0.315920 |
| H | 4.033443  | 3.916199  | 0.549158  |
| H | 3.716047  | 3.778124  | -1.211103 |
| C | -4.007536 | 0.889195  | -0.697377 |
| H | -4.866249 | 0.344361  | -1.086333 |
| C | -3.384655 | 0.464692  | 0.488247  |
| C | -3.715093 | -0.857890 | 1.163539  |
| H | -4.763263 | -0.876069 | 1.498229  |
| H | -3.103138 | -0.952445 | 2.070595  |
| C | -3.511491 | -2.102481 | 0.247420  |
| H | -4.296618 | -2.063607 | -0.520863 |
| H | -3.734115 | -2.997560 | 0.847748  |
| C | -2.308716 | 1.220524  | 0.969067  |
| H | -1.858583 | 0.960772  | 1.922607  |
| C | -1.709384 | 2.204545  | 0.173397  |
| C | -2.327976 | 2.621898  | -1.004325 |
| H | -1.866818 | 3.400344  | -1.606795 |
| C | -3.509471 | 1.986734  | -1.405595 |
| H | -4.006971 | 2.311295  | -2.317673 |
| C | -2.163142 | -2.298884 | -0.497726 |

|   |           |           |           |
|---|-----------|-----------|-----------|
| H | -1.804030 | -1.329008 | -0.868992 |
| H | -2.392150 | -2.884218 | -1.401174 |
| C | -1.001103 | -3.031807 | 0.217399  |
| C | 0.123970  | -3.369908 | -0.795205 |
| C | 1.369358  | -4.162041 | -0.305188 |
| H | 1.040852  | -4.932011 | 0.409847  |
| H | 1.756502  | -4.717401 | -1.173190 |
| C | 2.576050  | -3.409075 | 0.319446  |
| H | 2.277863  | -2.917612 | 1.252722  |
| H | 3.297538  | -4.176627 | 0.635630  |
| H | -0.344447 | -3.975475 | -1.585838 |
| H | 0.442703  | -2.445409 | -1.296469 |
| H | -1.376268 | -3.967809 | 0.660586  |
| H | -0.618104 | -2.432957 | 1.056487  |
| C | 3.307867  | -2.414741 | -0.635555 |
| H | 2.648357  | -2.146036 | -1.471562 |
| H | 4.157124  | -2.943922 | -1.089449 |
| C | 3.844358  | -1.092073 | -0.015059 |
| H | 4.349955  | -1.315405 | 0.938747  |
| H | 4.624080  | -0.685131 | -0.674163 |

Sum of electronic and zero-point Energies= -1005.142906  
Sum of electronic and thermal Energies= -1005.121798  
Sum of electronic and thermal Enthalpies= -1005.120854  
Sum of electronic and thermal Free Energies= -1005.191276

#### daec[n=3]-1-E1 (benzene)

|   |           |           |           |
|---|-----------|-----------|-----------|
| C | 1.716919  | -1.804205 | 0.689266  |
| H | 2.213144  | -1.661301 | 1.645113  |
| C | 2.475155  | -1.716410 | -0.493328 |
| C | 1.839965  | -1.936560 | -1.718148 |
| H | 2.412442  | -1.890373 | -2.642399 |
| C | 0.459767  | -2.173251 | -1.769561 |
| H | -0.052112 | -2.312426 | -2.719133 |
| C | -0.291795 | -2.191293 | -0.602975 |
| O | -1.662364 | -2.373674 | -0.653211 |
| C | 0.340040  | -2.037235 | 0.651522  |
| O | -0.471969 | -2.108053 | 1.737543  |
| C | 0.103107  | -1.907613 | 3.021268  |
| H | -0.722287 | -1.996887 | 3.733413  |
| H | 0.861056  | -2.670946 | 3.249223  |
| H | 0.552143  | -0.907881 | 3.111606  |
| C | -4.163578 | 0.933723  | -0.205886 |
| H | -4.840070 | 1.780063  | -0.096561 |
| C | -2.838044 | 1.150752  | -0.610474 |
| C | -2.328199 | 2.551238  | -0.895064 |
| H | -3.149041 | 3.144677  | -1.321407 |
| H | -1.548656 | 2.507476  | -1.667620 |
| C | -1.787219 | 3.314388  | 0.339200  |
| H | -2.566179 | 3.317471  | 1.115729  |
| H | -1.642554 | 4.365694  | 0.046057  |
| C | -1.989305 | 0.044129  | -0.754837 |
| H | -0.965602 | 0.192600  | -1.085536 |
| C | -2.452673 | -1.249741 | -0.494310 |
| C | -3.776752 | -1.462245 | -0.100848 |
| H | -4.118280 | -2.476342 | 0.090456  |
| C | -4.624445 | -0.363027 | 0.040657  |
| H | -5.657378 | -0.521750 | 0.345755  |
| C | -0.475981 | 2.791991  | 0.953696  |
| H | -0.606197 | 1.749823  | 1.281086  |
| H | -0.282836 | 3.373711  | 1.868541  |
| C | 0.758838  | 2.889014  | 0.040339  |
| C | 2.082558  | 2.665367  | 0.793202  |
| C | 3.326306  | 2.589792  | -0.117958 |
| H | 3.258432  | 3.386094  | -0.874543 |
| H | 4.226984  | 2.814453  | 0.473750  |
| C | 3.517475  | 1.229091  | -0.818985 |
| H | 2.552207  | 0.889010  | -1.218689 |
| H | 4.177176  | 1.351314  | -1.690985 |
| H | 2.212150  | 3.484149  | 1.516944  |
| H | 2.007766  | 1.745825  | 1.393879  |

|   |          |           |           |
|---|----------|-----------|-----------|
| H | 0.786718 | 3.882778  | -0.435247 |
| H | 0.672479 | 2.163677  | -0.781322 |
| C | 4.107599 | 0.145583  | 0.101546  |
| H | 3.646285 | 0.214885  | 1.096951  |
| H | 5.179558 | 0.342117  | 0.252181  |
| C | 3.932134 | -1.302308 | -0.416100 |
| H | 4.394386 | -1.400056 | -1.408144 |
| H | 4.481683 | -1.981119 | 0.252911  |

Sum of electronic and zero-point Energies= -1005.183947  
Sum of electronic and thermal Energies= -1005.161854  
Sum of electronic and thermal Enthalpies= -1005.160910  
Sum of electronic and thermal Free Energies= -1005.234765

#### daec[n=3]-1-E2 (benzene)

|   |           |           |           |
|---|-----------|-----------|-----------|
| C | 1.728666  | -2.093356 | -0.513157 |
| H | 2.237000  | -2.268983 | -1.456913 |
| C | 2.471401  | -1.612732 | 0.577308  |
| C | 1.820111  | -1.409027 | 1.800369  |
| H | 2.381739  | -1.061503 | 2.665406  |
| C | 0.442354  | -1.609205 | 1.908150  |
| H | -0.083010 | -1.421141 | 2.841810  |
| C | -0.296506 | -2.029404 | 0.807643  |
| O | -1.667568 | -2.182081 | 0.921274  |
| C | 0.347548  | -2.313095 | -0.413113 |
| O | -0.449430 | -2.748280 | -1.423017 |
| C | 0.148257  | -3.016506 | -2.684236 |
| H | -0.665720 | -3.353921 | -3.332265 |
| H | 0.604179  | -2.114186 | -3.117091 |
| H | 0.906009  | -3.809946 | -2.612306 |
| C | -4.202915 | 0.968686  | -0.094612 |
| H | -4.888146 | 1.774708  | -0.352438 |
| C | -2.845538 | 1.076755  | -0.429110 |
| C | -2.314588 | 2.304885  | -1.144928 |
| H | -3.124681 | 2.733859  | -1.750658 |
| H | -1.529571 | 2.005832  | -1.852882 |
| C | -1.773425 | 3.424550  | -0.221174 |
| H | -2.551798 | 3.675812  | 0.514137  |
| H | -1.631795 | 4.325856  | -0.837392 |
| C | -1.982446 | 0.022827  | -0.094279 |
| H | -0.930962 | 0.090877  | -0.354537 |
| C | -2.465634 | -1.114961 | 0.559641  |
| C | -3.822653 | -1.221782 | 0.882822  |
| H | -4.179586 | -2.117364 | 1.385199  |
| C | -4.682107 | -0.174331 | 0.553097  |
| H | -5.739076 | -0.253401 | 0.801641  |
| C | -0.459034 | 3.131836  | 0.525547  |
| H | -0.583385 | 2.251972  | 1.173682  |
| H | -0.264869 | 3.978536  | 1.202209  |
| C | 0.771356  | 2.931870  | -0.376472 |
| C | 2.098939  | 2.931041  | 0.402096  |
| C | 3.332646  | 2.579838  | -0.456675 |
| H | 3.260517  | 3.116963  | -1.414539 |
| H | 4.241390  | 2.961457  | 0.033333  |
| C | 3.506708  | 1.070281  | -0.723597 |
| H | 2.529155  | 0.633237  | -0.969760 |
| H | 4.136196  | 0.920215  | -1.613517 |
| H | 2.239439  | 3.926185  | 0.850222  |
| H | 2.024763  | 2.229950  | 1.247409  |
| H | 0.805375  | 3.733178  | -1.132448 |
| H | 0.671967  | 1.992081  | -0.938750 |
| C | 4.131687  | 0.308886  | 0.459522  |
| H | 3.712951  | 0.682929  | 1.404439  |
| H | 5.209775  | 0.524750  | 0.499000  |
| C | 3.928741  | -1.225479 | 0.415552  |
| H | 4.320534  | -1.624718 | -0.530522 |
| H | 4.526175  | -1.679806 | 1.219099  |

Sum of electronic and zero-point Energies= -1005.183488  
Sum of electronic and thermal Energies= -1005.161358  
Sum of electronic and thermal Enthalpies= -1005.160414  
Sum of electronic and thermal Free Energies= -1005.234517



## daec[n=3]-2-TS (benzene)

|   |           |           |           |
|---|-----------|-----------|-----------|
| C | 2.375108  | 2.145878  | -0.089687 |
| H | 3.224942  | 2.800351  | 0.086119  |
| C | 2.571929  | 0.750512  | -0.091455 |
| C | 1.454442  | -0.041582 | -0.314692 |
| H | 1.533819  | -1.112675 | -0.326002 |
| C | 0.193523  | 0.501997  | -0.494277 |
| H | -0.629683 | -0.178257 | -0.629221 |
| C | -0.021736 | 1.870249  | -0.453118 |
| O | -1.293471 | 2.430436  | -0.559654 |
| C | 1.098904  | 2.715702  | -0.268229 |
| O | 0.838925  | 4.052676  | -0.249027 |
| C | 1.926186  | 4.945818  | -0.067256 |
| H | 2.671833  | 4.848044  | -0.870109 |
| H | 2.418965  | 4.796483  | 0.904954  |
| H | 1.494690  | 5.950818  | -0.099206 |
| C | -4.018981 | -0.264780 | 1.064088  |
| H | -4.632098 | -1.020002 | 1.553378  |
| C | -3.475856 | -0.530555 | -0.201644 |
| C | -3.592695 | -1.903949 | -0.848334 |
| H | -4.156625 | -1.829719 | -1.790715 |
| H | -4.180745 | -2.557880 | -0.189815 |
| C | -2.229977 | -2.581514 | -1.172228 |
| H | -1.692981 | -1.954544 | -1.899757 |
| H | -2.441111 | -3.524976 | -1.697387 |
| C | -2.705794 | 0.472969  | -0.810261 |
| H | -2.297360 | 0.319745  | -1.806041 |
| C | -2.317438 | 1.606428  | -0.089234 |
| C | -2.870728 | 1.872024  | 1.164278  |
| H | -2.571786 | 2.767713  | 1.702825  |
| C | -3.757972 | 0.944769  | 1.716943  |
| H | -4.198214 | 1.138074  | 2.693385  |
| C | -1.297742 | -2.859766 | 0.026163  |
| H | -1.760764 | -3.607217 | 0.689103  |
| H | -1.200402 | -1.946602 | 0.629594  |
| C | 0.116877  | -3.334371 | -0.386197 |
| C | 1.117033  | -3.391318 | 0.791839  |
| C | 2.601633  | -3.668828 | 0.432326  |
| H | 2.639033  | -4.524879 | -0.258946 |
| H | 3.109196  | -4.007254 | 1.348808  |
| C | 3.448829  | -2.519792 | -0.177884 |
| H | 4.397813  | -2.958883 | -0.518802 |
| H | 2.972208  | -2.149007 | -1.093623 |
| H | 0.787480  | -4.185079 | 1.479129  |
| H | 1.045485  | -2.460023 | 1.371861  |
| H | 0.495576  | -2.664531 | -1.172001 |
| H | 0.053398  | -4.328548 | -0.855374 |
| C | 3.777127  | -1.349377 | 0.797030  |
| H | 4.721231  | -1.588361 | 1.305929  |
| H | 3.019869  | -1.298773 | 1.591247  |
| C | 3.909502  | 0.070172  | 0.175272  |
| H | 4.497663  | 0.007408  | -0.755120 |
| H | 4.501895  | 0.699544  | 0.854566  |

Sum of electronic and zero-point Energies= -1005.152626

Sum of electronic and thermal Energies= -1005.131623

Sum of electronic and thermal Enthalpies= -1005.130679

Sum of electronic and thermal Free Energies= -1005.200722

## daec[n=3]-2-E1 (benzene)

|   |           |          |           |
|---|-----------|----------|-----------|
| C | 1.625519  | 2.032328 | -0.532227 |
| H | 2.229873  | 2.183103 | -1.422010 |
| C | 2.265992  | 1.711775 | 0.675627  |
| C | 1.484777  | 1.535800 | 1.825235  |
| H | 1.961379  | 1.304738 | 2.776141  |
| C | 0.095006  | 1.651221 | 1.761481  |
| H | -0.520486 | 1.515881 | 2.648073  |
| C | -0.535196 | 1.944128 | 0.555517  |
| O | -1.909630 | 2.100445 | 0.508323  |
| C | 0.229287  | 2.149772 | -0.610055 |

|   |           |           |           |
|---|-----------|-----------|-----------|
| O | -0.466562 | 2.439518  | -1.740254 |
| C | 0.261247  | 2.643994  | -2.943348 |
| H | 0.826079  | 1.746016  | -3.233431 |
| H | 0.950019  | 3.497143  | -2.860745 |
| H | -0.488124 | 2.860239  | -3.710248 |
| C | -4.429489 | -1.208352 | 0.341506  |
| H | -5.109716 | -2.058333 | 0.306919  |
| C | -3.083899 | -1.383658 | -0.022044 |
| C | -2.617418 | -2.764552 | -0.473245 |
| H | -3.323393 | -3.115411 | -1.240384 |
| H | -2.735715 | -3.467752 | 0.366837  |
| C | -1.187882 | -2.884359 | -1.030790 |
| H | -1.005397 | -2.062812 | -1.739606 |
| H | -1.129121 | -3.805973 | -1.627856 |
| C | -2.229551 | -0.274482 | 0.027519  |
| H | -1.187027 | -0.369642 | -0.252865 |
| C | -2.706990 | 0.975984  | 0.438746  |
| C | -4.048257 | 1.146267  | 0.788954  |
| H | -4.397315 | 2.127463  | 1.100491  |
| C | -4.903308 | 0.044148  | 0.735142  |
| H | -5.950217 | 0.166360  | 1.007704  |
| C | -0.069176 | -2.917378 | 0.026504  |
| H | -0.129315 | -3.864418 | 0.585588  |
| H | -0.223641 | -2.121189 | 0.768343  |
| C | 1.328734  | -2.756397 | -0.588463 |
| C | 2.473604  | -2.777743 | 0.437742  |
| C | 3.832620  | -2.332099 | -0.140802 |
| H | 4.012608  | -2.874900 | -1.081257 |
| H | 4.640091  | -2.636466 | 0.542621  |
| C | 3.936341  | -0.814751 | -0.397651 |
| H | 4.756066  | -0.614582 | -1.103598 |
| H | 3.020949  | -0.471528 | -0.898614 |
| H | 2.568085  | -3.793453 | 0.850081  |
| H | 2.207761  | -2.131972 | 1.288409  |
| H | 1.349783  | -1.807051 | -1.143993 |
| H | 1.498518  | -3.545781 | -1.338214 |
| C | 4.166730  | 0.017975  | 0.876743  |
| H | 5.227162  | -0.043734 | 1.162448  |
| H | 3.601417  | -0.412113 | 1.715331  |
| C | 3.768530  | 1.507483  | 0.738673  |
| H | 4.244093  | 1.934966  | -0.155384 |
| H | 4.171793  | 2.058862  | 1.600084  |

Sum of electronic and zero-point Energies= -1005.182460

Sum of electronic and thermal Energies= -1005.160213

Sum of electronic and thermal Enthalpies= -1005.159269

Sum of electronic and thermal Free Energies= -1005.234322

## daec[n=3]-2-E2 (benzene)

|   |           |           |           |
|---|-----------|-----------|-----------|
| C | 1.441186  | 1.967442  | 0.605392  |
| H | 1.890050  | 2.042158  | 1.592018  |
| C | 2.280879  | 1.820053  | -0.515044 |
| C | 1.699965  | 1.756735  | -1.784270 |
| H | 2.330462  | 1.658122  | -2.665672 |
| C | 0.306782  | 1.802109  | -1.932172 |
| H | -0.156187 | 1.742001  | -2.914498 |
| C | -0.516201 | 1.915161  | -0.819680 |
| O | -1.887225 | 1.999141  | -0.977485 |
| C | 0.051540  | 2.019638  | 0.471355  |
| O | -0.827808 | 2.163195  | 1.496098  |
| C | -0.315409 | 2.223189  | 2.819946  |
| H | 0.334373  | 3.098685  | 2.963049  |
| H | 0.238962  | 1.309975  | 3.080374  |
| H | -1.188603 | 2.312864  | 3.472449  |
| C | -4.343426 | -1.145146 | 0.211946  |
| H | -5.006597 | -1.952594 | 0.519757  |
| C | -3.008113 | -1.433778 | -0.116383 |
| C | -2.530019 | -2.881538 | -0.056295 |
| H | -3.213520 | -3.481211 | -0.675988 |
| H | -2.672394 | -3.255709 | 0.970102  |
| C | -1.086194 | -3.171562 | -0.501944 |

|   |           |           |           |
|---|-----------|-----------|-----------|
| H | -0.895108 | -2.670564 | -1.462707 |
| H | -1.002483 | -4.247911 | -0.711110 |
| C | -2.177557 | -0.377996 | -0.512801 |
| H | -1.144803 | -0.561048 | -0.787768 |
| C | -2.666106 | 0.932729  | -0.566187 |
| C | -3.996308 | 1.212236  | -0.251464 |
| H | -4.353493 | 2.237386  | -0.304733 |
| C | -4.829655 | 0.161013  | 0.136395  |
| H | -5.868766 | 0.367416  | 0.387235  |
| C | 0.005276  | -2.784186 | 0.512285  |
| H | -0.054257 | -3.458324 | 1.381312  |
| H | -0.182581 | -1.773852 | 0.902392  |
| C | 1.416637  | -2.826599 | -0.091755 |
| C | 2.533846  | -2.452856 | 0.896516  |
| C | 3.901724  | -2.211516 | 0.224708  |
| H | 4.112018  | -3.047312 | -0.459793 |
| H | 4.695074  | -2.239383 | 0.987406  |
| C | 3.994574  | -0.880391 | -0.549140 |
| H | 4.829799  | -0.926111 | -1.263582 |
| H | 3.088960  | -0.752218 | -1.157473 |
| H | 2.631685  | -3.251482 | 1.647088  |
| H | 2.235054  | -1.552252 | 1.454521  |
| H | 1.441285  | -2.141659 | -0.952251 |
| H | 1.616059  | -3.829677 | -0.501620 |
| C | 4.183328  | 0.351844  | 0.354379  |
| H | 5.235370  | 0.412926  | 0.669752  |
| H | 3.598259  | 0.233804  | 1.277459  |
| C | 3.778797  | 1.689785  | -0.309820 |
| H | 4.293910  | 1.792693  | -1.275102 |
| H | 4.134452  | 2.516399  | 0.322676  |

Sum of electronic and zero-point Energies= -1005.183351  
Sum of electronic and thermal Energies= -1005.161178  
Sum of electronic and thermal Enthalpies= -1005.160234  
Sum of electronic and thermal Free Energies= -1005.234393

#### daec[n=3]-3-TS (benzene)

|   |           |           |           |
|---|-----------|-----------|-----------|
| C | 3.155057  | 1.099003  | -0.023248 |
| H | 4.187513  | 1.420161  | 0.087893  |
| C | 2.861226  | -0.280486 | -0.060006 |
| C | 1.529832  | -0.631939 | -0.208028 |
| H | 1.245142  | -1.662095 | -0.289189 |
| C | 0.514040  | 0.311612  | -0.253233 |
| H | -0.499738 | -0.050145 | -0.295675 |
| C | 0.788989  | 1.669041  | -0.232051 |
| O | -0.186868 | 2.654589  | -0.300903 |
| C | 2.145277  | 2.072248  | -0.127528 |
| O | 2.361778  | 3.417307  | -0.118671 |
| C | 3.697262  | 3.881380  | -0.002252 |
| H | 4.158077  | 3.563755  | 0.944954  |
| H | 3.635770  | 4.973645  | -0.022177 |
| H | 4.321653  | 3.540176  | -0.841263 |
| C | -4.028533 | 1.258544  | 0.538417  |
| H | -4.992319 | 0.845007  | 0.831026  |
| C | -3.328155 | 0.703819  | -0.546296 |
| C | -3.782225 | -0.570406 | -1.241419 |
| H | -3.106549 | -0.774820 | -2.082631 |
| H | -4.782366 | -0.432793 | -1.679233 |
| C | -3.861540 | -1.815147 | -0.310216 |
| H | -4.194017 | -2.666774 | -0.923172 |
| H | -4.671350 | -1.636353 | 0.411783  |
| C | -2.109742 | 1.289225  | -0.910868 |
| H | -1.578504 | 0.916166  | -1.781653 |
| C | -1.503494 | 2.255759  | -0.097688 |
| C | -2.201818 | 2.801948  | 0.978330  |
| H | -1.729703 | 3.564946  | 1.591923  |
| C | -3.485594 | 2.322364  | 1.263298  |
| H | -4.042642 | 2.749746  | 2.094994  |
| C | -2.608530 | -2.224514 | 0.500840  |
| H | -2.949207 | -2.908142 | 1.293672  |
| H | -2.215396 | -1.342058 | 1.026691  |

|   |           |           |           |
|---|-----------|-----------|-----------|
| C | -1.453516 | -2.917673 | -0.252047 |
| C | -0.296171 | -3.314249 | 0.696703  |
| C | 0.984463  | -3.854173 | -0.006553 |
| H | 0.996619  | -3.494318 | -1.045284 |
| H | 0.912652  | -4.946842 | -0.093792 |
| C | 2.343775  | -3.475263 | 0.681185  |
| H | 2.775545  | -4.381349 | 1.125366  |
| H | 2.143429  | -2.808337 | 1.530278  |
| H | -0.662489 | -4.055835 | 1.422091  |
| H | -0.033249 | -2.429995 | 1.293349  |
| H | -1.060357 | -2.252323 | -1.035858 |
| H | -1.833487 | -3.809207 | -0.775396 |
| C | 3.426091  | -2.817714 | -0.245359 |
| H | 3.071472  | -2.824139 | -1.286078 |
| H | 4.324385  | -3.449352 | -0.239851 |
| C | 3.901205  | -1.379867 | 0.103139  |
| H | 4.780739  | -1.153453 | -0.518560 |
| H | 4.271703  | -1.371509 | 1.141675  |

Sum of electronic and zero-point Energies= -1005.145937  
Sum of electronic and thermal Energies= -1005.124796  
Sum of electronic and thermal Enthalpies= -1005.123852  
Sum of electronic and thermal Free Energies= -1005.194324

#### daec[n=3]-3-E1 (benzene)

|   |           |           |           |
|---|-----------|-----------|-----------|
| C | -2.336385 | -1.601234 | -0.432341 |
| H | -2.955155 | -1.780201 | -1.307451 |
| C | -2.881669 | -0.890730 | 0.652505  |
| C | -2.087107 | -0.683247 | 1.785369  |
| H | -2.496726 | -0.160362 | 2.646988  |
| C | -0.767824 | -1.145730 | 1.822960  |
| H | -0.144719 | -0.991119 | 2.701039  |
| C | -0.226867 | -1.823945 | 0.737279  |
| O | 1.055588  | -2.340119 | 0.810056  |
| C | -1.015949 | -2.069531 | -0.407384 |
| O | -0.410967 | -2.753356 | -1.413051 |
| C | -1.164071 | -3.027758 | -2.586376 |
| H | -2.044439 | -3.648713 | -2.366300 |
| H | -0.490932 | -3.580054 | -3.248415 |
| H | -1.485825 | -2.103248 | -3.087622 |
| C | 4.409382  | 0.022075  | 0.077061  |
| H | 5.303537  | 0.615133  | -0.108707 |
| C | 3.177188  | 0.443663  | -0.443434 |
| C | 3.077744  | 1.717564  | -1.263135 |
| H | 2.296996  | 1.598931  | -2.025851 |
| H | 4.019386  | 1.858017  | -1.811771 |
| C | 2.810841  | 3.010007  | -0.450093 |
| H | 2.861783  | 3.859104  | -1.149054 |
| H | 3.635151  | 3.150825  | 0.264451  |
| C | 2.038891  | -0.341432 | -0.200154 |
| H | 1.077501  | -0.041067 | -0.606025 |
| C | 2.132502  | -1.517812 | 0.549179  |
| C | 3.366340  | -1.938145 | 1.057304  |
| H | 3.417189  | -2.860445 | 1.630504  |
| C | 4.499060  | -1.161411 | 0.815735  |
| H | 5.461925  | -1.484592 | 1.207603  |
| C | 1.478395  | 3.063013  | 0.317540  |
| H | 1.446368  | 4.000413  | 0.893938  |
| H | 1.456542  | 2.251500  | 1.059508  |
| C | 0.221221  | 2.961669  | -0.559572 |
| C | -1.093876 | 2.943934  | 0.243127  |
| C | -2.232756 | 2.240232  | -0.507811 |
| H | -1.891187 | 1.226975  | -0.756611 |
| H | -2.415164 | 2.739393  | -1.472888 |
| C | -3.559132 | 2.145722  | 0.271463  |
| H | -4.099643 | 3.098956  | 0.182559  |
| H | -3.347486 | 2.024235  | 1.344443  |
| H | -1.385335 | 3.968555  | 0.521528  |
| H | -0.928705 | 2.406924  | 1.189516  |
| H | 0.271924  | 2.038278  | -1.153378 |
| H | 0.206370  | 3.784359  | -1.291637 |

|   |           |           |           |
|---|-----------|-----------|-----------|
| C | -4.466957 | 0.986870  | -0.200192 |
| H | -4.298457 | 0.803867  | -1.272015 |
| H | -5.523624 | 1.275036  | -0.106499 |
| C | -4.293892 | -0.339636 | 0.586363  |
| H | -4.962308 | -1.091034 | 0.141432  |
| H | -4.652413 | -0.176702 | 1.612322  |

Sum of electronic and zero-point Energies= -1005.180862  
Sum of electronic and thermal Energies= -1005.158580  
Sum of electronic and thermal Enthalpies= -1005.157636  
Sum of electronic and thermal Free Energies= -1005.232491

daec[n=3]-3-E2 (benzene)

|   |           |           |           |
|---|-----------|-----------|-----------|
| C | -2.104329 | -1.347210 | 0.726554  |
| H | -2.546845 | -1.159548 | 1.700496  |
| C | -2.897676 | -1.184092 | -0.422956 |
| C | -2.334144 | -1.470047 | -1.672047 |
| H | -2.934096 | -1.372463 | -2.575051 |
| C | -0.996372 | -1.869290 | -1.772989 |
| H | -0.547842 | -2.092692 | -2.738432 |
| C | -0.208190 | -1.994678 | -0.633918 |
| O | 1.093670  | -2.451167 | -0.734895 |
| C | -0.766502 | -1.749365 | 0.639371  |
| O | 0.063601  | -1.934675 | 1.698183  |
| C | -0.450295 | -1.718268 | 3.005118  |
| H | -0.776590 | -0.677873 | 3.146367  |
| H | 0.377367  | -1.930513 | 3.687945  |
| H | -1.286553 | -2.396571 | 3.227897  |
| C | 4.328710  | 0.111475  | -0.147782 |
| H | 5.194109  | 0.757322  | -0.006707 |
| C | 3.127386  | 0.655822  | -0.625882 |
| C | 3.019078  | 2.134869  | -0.950705 |
| H | 2.286687  | 2.276693  | -1.756157 |
| H | 3.982247  | 2.481002  | -1.351069 |
| C | 2.652306  | 3.049320  | 0.245573  |
| H | 2.691943  | 4.091534  | -0.107004 |
| H | 3.435561  | 2.954750  | 1.012072  |
| C | 2.029814  | -0.198914 | -0.811547 |
| H | 1.095020  | 0.195043  | -1.200391 |
| C | 2.130927  | -1.561979 | -0.519520 |
| C | 3.332922  | -2.100931 | -0.053125 |
| H | 3.390119  | -3.165145 | 0.160518  |
| C | 4.427170  | -1.255074 | 0.129865  |
| H | 5.367190  | -1.668077 | 0.491769  |
| C | 1.286736  | 2.785354  | 0.902864  |
| H | 1.181533  | 3.458909  | 1.767444  |
| H | 1.275432  | 1.764079  | 1.311228  |
| C | 0.074030  | 2.956172  | -0.024915 |
| C | -1.270176 | 2.632959  | 0.655848  |
| C | -2.346299 | 2.173280  | -0.337532 |
| H | -1.946284 | 1.314315  | -0.891532 |
| H | -2.526191 | 2.957204  | -1.090253 |
| C | -3.687361 | 1.775865  | 0.309273  |
| H | -4.262245 | 2.685425  | 0.535486  |
| H | -3.498733 | 1.296659  | 1.282161  |
| H | -1.621948 | 3.499496  | 1.236994  |
| H | -1.114165 | 1.823361  | 1.385200  |
| H | 0.189170  | 2.290619  | -0.891527 |
| H | 0.054449  | 3.978117  | -0.434825 |
| C | -4.539388 | 0.827969  | -0.565005 |
| H | -4.349394 | 1.040997  | -1.627431 |
| H | -5.607820 | 1.029921  | -0.402996 |
| C | -4.325180 | -0.685077 | -0.295183 |
| H | -4.970319 | -1.248058 | -0.984811 |
| H | -4.688980 | -0.906736 | 0.718157  |

Sum of electronic and zero-point Energies= -1005.181371  
Sum of electronic and thermal Energies= -1005.159173  
Sum of electronic and thermal Enthalpies= -1005.158229  
Sum of electronic and thermal Free Energies= -1005.232160

daec[n=3]-4-TS (benzene)

|   |           |           |           |
|---|-----------|-----------|-----------|
| C | 3.276579  | -0.432431 | -0.097935 |
| H | 4.359829  | -0.489786 | -0.028287 |
| C | 2.646272  | 0.825352  | 0.008967  |
| C | 1.262660  | 0.838399  | -0.083193 |
| H | 0.713789  | 1.758461  | -0.031314 |
| C | 0.526023  | -0.324206 | -0.224480 |
| H | -0.544673 | -0.237072 | -0.241606 |
| C | 1.127492  | -1.565935 | -0.321180 |
| O | 0.392066  | -2.740758 | -0.448524 |
| C | 2.541869  | -1.622580 | -0.271368 |
| O | 3.091840  | -2.864874 | -0.375068 |
| C | 4.504858  | -2.980301 | -0.324966 |
| H | 4.720812  | -4.046970 | -0.438462 |
| H | 4.988196  | -2.425774 | -1.142934 |
| H | 4.908507  | -2.631916 | 0.637364  |
| C | -3.502887 | -2.129771 | 0.914016  |
| H | -4.482894 | -1.902877 | 1.331496  |
| C | -3.102284 | -1.519943 | -0.287156 |
| C | -3.947771 | -0.442010 | -0.946984 |
| H | -5.005713 | -0.739260 | -0.915844 |
| H | -3.676879 | -0.367693 | -2.009717 |
| C | -3.846518 | 0.979394  | -0.311079 |
| H | -4.163194 | 0.927566  | 0.741191  |
| H | -4.592951 | 1.606198  | -0.822730 |
| C | -1.849053 | -1.863401 | -0.813257 |
| H | -1.523438 | -1.435032 | -1.758207 |
| C | -0.947188 | -2.637222 | -0.069328 |
| C | -1.353215 | -3.242682 | 1.118470  |
| H | -0.648385 | -3.853620 | 1.676761  |
| C | -2.652555 | -3.011758 | 1.584676  |
| H | -2.983176 | -3.487102 | 2.506295  |
| C | -2.468052 | 1.667651  | -0.406220 |
| H | -2.064019 | 1.512974  | -1.419168 |
| H | -1.773388 | 1.174850  | 0.283815  |
| C | -2.471484 | 3.186968  | -0.119443 |
| C | -1.125329 | 3.896663  | -0.430009 |
| C | -0.024172 | 3.812006  | 0.659682  |
| H | -0.125857 | 2.867056  | 1.208183  |
| H | -0.198066 | 4.592309  | 1.414866  |
| C | 1.426526  | 3.946483  | 0.102307  |
| H | 1.659362  | 5.015122  | -0.002522 |
| H | 1.450991  | 3.551679  | -0.922655 |
| H | -1.325155 | 4.955817  | -0.647586 |
| H | -0.733655 | 3.475613  | -1.368826 |
| H | -2.765520 | 3.373370  | 0.925229  |
| H | -3.253156 | 3.651424  | -0.739504 |
| C | 2.555194  | 3.255225  | 0.940084  |
| H | 2.128262  | 2.837330  | 1.862965  |
| H | 3.271975  | 4.020705  | 1.265835  |
| C | 3.381942  | 2.140670  | 0.232144  |
| H | 4.283520  | 1.950066  | 0.832403  |
| H | 3.750195  | 2.532210  | -0.730787 |

Sum of electronic and zero-point Energies= -1005.148636  
Sum of electronic and thermal Energies= -1005.127347  
Sum of electronic and thermal Enthalpies= -1005.126403  
Sum of electronic and thermal Free Energies= -1005.197627

daec[n=3]-4-E1 (benzene)

|   |           |           |           |
|---|-----------|-----------|-----------|
| C | 1.920111  | -1.756758 | -0.724913 |
| H | 2.490515  | -1.741352 | -1.649305 |
| C | 2.569726  | -1.429150 | 0.475998  |
| C | 1.834845  | -1.465182 | 1.667992  |
| H | 2.318206  | -1.236123 | 2.615521  |
| C | 0.474181  | -1.776634 | 1.648935  |
| H | -0.109038 | -1.793958 | 2.566981  |
| C | -0.171905 | -2.068778 | 0.450604  |
| O | -1.519542 | -2.398147 | 0.455188  |
| C | 0.556129  | -2.082300 | -0.754894 |
| O | -0.145869 | -2.390371 | -1.878531 |
| C | 0.551049  | -2.431914 | -3.116319 |

|   |           |           |           |
|---|-----------|-----------|-----------|
| H | -0.193885 | -2.711978 | -3.866769 |
| H | 0.975484  | -1.451499 | -3.377331 |
| H | 1.352571  | -3.184383 | -3.104079 |
| C | -4.292813 | 0.709718  | 0.634087  |
| H | -5.024047 | 1.513787  | 0.700503  |
| C | -3.186225 | 0.849212  | -0.217750 |
| C | -2.990982 | 2.111571  | -1.037662 |
| H | -3.954946 | 2.632351  | -1.114704 |
| H | -2.703077 | 1.841947  | -2.064963 |
| C | -1.942315 | 3.106651  | -0.479019 |
| H | -2.180114 | 3.331032  | 0.571785  |
| H | -2.052425 | 4.053917  | -1.028832 |
| C | -2.263576 | -0.204806 | -0.291915 |
| H | -1.419428 | -0.142679 | -0.971088 |
| C | -2.424740 | -1.350438 | 0.491821  |
| C | -3.536771 | -1.490921 | 1.325948  |
| H | -3.649381 | -2.397077 | 1.915915  |
| C | -4.470859 | -0.455113 | 1.385806  |
| H | -5.339922 | -0.554209 | 2.033828  |
| C | -0.487475 | 2.629374  | -0.591724 |
| H | -0.271909 | 2.387196  | -1.645863 |
| H | -0.370101 | 1.693897  | -0.032047 |
| C | 0.546134  | 3.651179  | -0.093454 |
| C | 2.009818  | 3.222652  | -0.314485 |
| C | 2.419986  | 1.944654  | 0.434187  |
| H | 1.786620  | 1.110437  | 0.113999  |
| H | 2.224072  | 2.079300  | 1.510255  |
| C | 3.898975  | 1.572214  | 0.238151  |
| H | 4.514829  | 2.437977  | 0.527412  |
| H | 4.099713  | 1.409589  | -0.833277 |
| H | 2.670566  | 4.048189  | -0.006880 |
| H | 2.184047  | 3.082807  | -1.393805 |
| H | 0.380565  | 3.843100  | 0.978628  |
| H | 0.379520  | 4.612790  | -0.603384 |
| C | 4.391624  | 0.349670  | 1.039844  |
| H | 4.034392  | 0.426972  | 2.077582  |
| H | 5.488995  | 0.395749  | 1.098546  |
| C | 4.039276  | -1.046561 | 0.472489  |
| H | 4.599246  | -1.791116 | 1.059311  |
| H | 4.427055  | -1.118563 | -0.553554 |

Sum of electronic and zero-point Energies= -1005.182538  
Sum of electronic and thermal Energies= -1005.160202  
Sum of electronic and thermal Enthalpies= -1005.159258  
Sum of electronic and thermal Free Energies= -1005.234230

daec[n=3]-4-E2 (benzene)

|   |           |           |           |
|---|-----------|-----------|-----------|
| C | 1.804144  | -1.806294 | 0.445938  |
| H | 2.305730  | -1.874220 | 1.406763  |
| C | 2.547752  | -1.434621 | -0.689771 |
| C | 1.898858  | -1.379897 | -1.926320 |
| H | 2.457973  | -1.110146 | -2.820158 |
| C | 0.527789  | -1.652484 | -2.025850 |
| H | 0.013919  | -1.605731 | -2.983368 |
| C | -0.209089 | -1.972803 | -0.893646 |
| O | -1.562333 | -2.250430 | -0.986304 |
| C | 0.434551  | -2.069925 | 0.361847  |
| O | -0.358710 | -2.417504 | 1.408427  |
| C | 0.225119  | -2.482013 | 2.702000  |
| H | -0.587782 | -2.753842 | 3.381488  |
| H | 1.010919  | -3.249554 | 2.753880  |
| H | 0.641934  | -1.511135 | 3.006481  |
| C | -4.263967 | 0.626784  | 0.359235  |
| H | -4.981911 | 1.363260  | 0.716862  |
| C | -3.143057 | 1.050745  | -0.369944 |
| C | -2.918654 | 2.523138  | -0.665097 |
| H | -3.867743 | 3.056601  | -0.520245 |
| H | -2.654729 | 2.648204  | -1.726189 |
| C | -1.832914 | 3.220077  | 0.193490  |
| H | -2.045440 | 3.045573  | 1.259089  |
| H | -1.927312 | 4.305207  | 0.034233  |

|   |           |           |           |
|---|-----------|-----------|-----------|
| C | -2.239054 | 0.078674  | -0.826456 |
| H | -1.377385 | 0.371583  | -1.418789 |
| C | -2.437017 | -1.272689 | -0.534691 |
| C | -3.562570 | -1.691030 | 0.178303  |
| H | -3.697782 | -2.749153 | 0.386040  |
| C | -4.474797 | -0.731350 | 0.618312  |
| H | -5.354832 | -1.045162 | 1.177085  |
| C | -0.393689 | 2.792048  | -0.126800 |
| H | -0.209558 | 2.935498  | -1.204550 |
| H | -0.286651 | 1.717403  | 0.061838  |
| C | 0.678625  | 3.554025  | 0.667105  |
| C | 2.124257  | 3.203115  | 0.263889  |
| C | 2.506773  | 1.732323  | 0.491190  |
| H | 1.846135  | 1.085593  | -0.095854 |
| H | 2.326236  | 1.473962  | 1.547556  |
| C | 3.971196  | 1.418130  | 0.143782  |
| H | 4.617434  | 2.107385  | 0.709339  |
| H | 4.154455  | 1.642353  | -0.919376 |
| H | 2.815918  | 3.847757  | 0.828494  |
| H | 2.273103  | 3.456718  | -0.798142 |
| H | 0.542857  | 3.358835  | 1.742930  |
| H | 0.527723  | 4.636518  | 0.533579  |
| C | 4.432121  | -0.022525 | 0.447469  |
| H | 4.092699  | -0.307723 | 1.454803  |
| H | 5.530999  | -0.030197 | 0.493028  |
| C | 4.028007  | -1.116774 | -0.569255 |
| H | 4.565673  | -2.037148 | -0.291477 |
| H | 4.409464  | -0.834908 | -1.560704 |

Sum of electronic and zero-point Energies= -1005.183155  
Sum of electronic and thermal Energies= -1005.160854  
Sum of electronic and thermal Enthalpies= -1005.159909  
Sum of electronic and thermal Free Energies= -1005.234483

daec[n=3]-5-TS (benzene)

|   |           |           |           |
|---|-----------|-----------|-----------|
| C | 2.109827  | 2.592475  | -0.192856 |
| H | 2.795064  | 3.427071  | -0.053625 |
| C | 2.568145  | 1.268257  | -0.215999 |
| C | 1.601022  | 0.286951  | -0.390946 |
| H | 1.894297  | -0.742085 | -0.435578 |
| C | 0.256867  | 0.575170  | -0.482047 |
| H | -0.420730 | -0.257232 | -0.553726 |
| C | -0.212056 | 1.885939  | -0.462039 |
| O | -1.572635 | 2.185759  | -0.574596 |
| C | 0.742380  | 2.919623  | -0.329018 |
| O | 0.438736  | 4.255363  | -0.356334 |
| C | -0.600851 | 4.731367  | 0.501754  |
| H | -0.510683 | 4.302249  | 1.510182  |
| H | -1.594984 | 4.510399  | 0.099403  |
| H | -0.463408 | 5.816550  | 0.562311  |
| C | -3.890132 | -1.032275 | 0.723183  |
| H | -4.411310 | -1.894490 | 1.135916  |
| C | -3.120729 | -1.172005 | -0.444615 |
| C | -2.828417 | -2.528183 | -1.069575 |
| H | -2.228618 | -2.378122 | -1.977142 |
| H | -3.762622 | -3.008504 | -1.397592 |
| C | -2.114368 | -3.535545 | -0.119806 |
| H | -1.975021 | -4.472394 | -0.680439 |
| H | -2.818398 | -3.778410 | 0.689049  |
| C | -2.501315 | -0.027299 | -0.961622 |
| H | -1.949616 | -0.091739 | -1.895366 |
| C | -2.450125 | 1.158975  | -0.218278 |
| C | -3.210549 | 1.292017  | 0.941877  |
| H | -3.179700 | 2.220498  | 1.506254  |
| C | -3.967856 | 0.198454  | 1.379550  |
| H | -4.574984 | 0.294397  | 2.277725  |
| C | -0.774113 | -3.137967 | 0.548950  |
| H | -0.621196 | -3.834792 | 1.387463  |
| H | -0.878420 | -2.145292 | 1.010692  |
| C | 0.504596  | -3.159604 | -0.316481 |
| C | 1.786889  | -2.882361 | 0.511774  |

|   |          |           |           |
|---|----------|-----------|-----------|
| C | 3.063818 | -2.634644 | -0.335801 |
| H | 2.801845 | -2.120735 | -1.271311 |
| H | 3.457323 | -3.609259 | -0.661675 |
| C | 4.241055 | -1.892422 | 0.357367  |
| H | 5.082215 | -1.890602 | -0.353238 |
| H | 4.572507 | -2.523667 | 1.196662  |
| H | 1.966543 | -3.727167 | 1.193649  |
| H | 1.595713 | -2.019758 | 1.163939  |
| H | 0.425666 | -2.413040 | -1.120992 |
| H | 0.595371 | -4.134459 | -0.820708 |
| C | 4.113655 | -0.453046 | 0.945607  |
| H | 3.296842 | -0.417495 | 1.679136  |
| H | 5.033359 | -0.316428 | 1.531912  |
| C | 3.996526 | 0.794993  | 0.004161  |
| H | 4.585879 | 1.614135  | 0.437193  |
| H | 4.472652 | 0.568179  | -0.963506 |

Sum of electronic and zero-point Energies= -1005.141364  
Sum of electronic and thermal Energies= -1005.120028  
Sum of electronic and thermal Enthalpies= -1005.119084  
Sum of electronic and thermal Free Energies= -1005.190537

#### daec[n=3]-5-E1 (benzene)

|   |           |           |           |
|---|-----------|-----------|-----------|
| C | 1.932613  | 1.811819  | -0.618258 |
| H | 2.478456  | 1.978628  | -1.544960 |
| C | 2.579872  | 1.282594  | 0.505084  |
| C | 1.827736  | 1.111472  | 1.679365  |
| H | 2.307403  | 0.734497  | 2.580783  |
| C | 0.465874  | 1.407488  | 1.705730  |
| H | -0.123033 | 1.256453  | 2.607804  |
| C | -0.174530 | 1.890414  | 0.562876  |
| O | -1.534915 | 2.163421  | 0.602520  |
| C | 0.565491  | 2.119228  | -0.608273 |
| O | -0.014864 | 2.553320  | -1.771266 |
| C | -0.573595 | 3.871558  | -1.740396 |
| H | 0.200074  | 4.616444  | -1.502166 |
| H | -1.392956 | 3.949125  | -1.016803 |
| H | -0.956878 | 4.059851  | -2.748367 |
| C | -4.270124 | -0.958869 | 0.198655  |
| H | -5.002570 | -1.758804 | 0.102060  |
| C | -2.992686 | -1.116965 | -0.358585 |
| C | -2.606101 | -2.390357 | -1.086864 |
| H | -1.950248 | -2.141259 | -1.931666 |
| H | -3.509424 | -2.838921 | -1.522662 |
| C | -1.921799 | -3.466593 | -0.205970 |
| H | -1.793733 | -4.368988 | -0.823446 |
| H | -2.611930 | -3.744639 | 0.604244  |
| C | -2.069144 | -0.069039 | -0.229159 |
| H | -1.082618 | -0.161593 | -0.672185 |
| C | -2.411195 | 1.100504  | 0.453486  |
| C | -3.688470 | 1.259317  | 0.998644  |
| H | -3.936001 | 2.181056  | 1.519264  |
| C | -4.612654 | 0.222504  | 0.863372  |
| H | -5.610021 | 0.337961  | 1.284009  |
| C | -0.565583 | -3.082838 | 0.412751  |
| H | -0.241855 | -3.909568 | 1.063909  |
| H | -0.698131 | -2.213945 | 1.073562  |
| C | 0.551425  | -2.776040 | -0.596985 |
| C | 1.893102  | -2.422748 | 0.066993  |
| C | 2.914071  | -1.844677 | -0.924586 |
| H | 2.497884  | -0.928674 | -1.366934 |
| H | 3.038212  | -2.551195 | -1.760477 |
| C | 4.310429  | -1.555902 | -0.343431 |
| H | 4.963744  | -1.218235 | -1.163342 |
| H | 4.743927  | -2.504488 | 0.010791  |
| H | 2.311245  | -3.317894 | 0.555070  |
| H | 1.709497  | -1.694146 | 0.868800  |
| H | 0.249140  | -1.936223 | -1.239131 |
| H | 0.688025  | -3.635274 | -1.273165 |
| C | 4.418059  | -0.537678 | 0.809350  |
| H | 3.823061  | -0.874200 | 1.669661  |

|   |          |           |           |
|---|----------|-----------|-----------|
| H | 5.463226 | -0.548718 | 1.151105  |
| C | 4.057769 | 0.932691  | 0.476313  |
| H | 4.572783 | 1.573947  | 1.207676  |
| H | 4.477591 | 1.197576  | -0.504150 |

Sum of electronic and zero-point Energies= -1005.180013  
Sum of electronic and thermal Energies= -1005.157640  
Sum of electronic and thermal Enthalpies= -1005.156696  
Sum of electronic and thermal Free Energies= -1005.231663

#### daec[n=3]-5-E2 (benzene)

|   |           |           |           |
|---|-----------|-----------|-----------|
| C | 1.772481  | 1.601391  | 0.699760  |
| H | 2.183722  | 1.555355  | 1.706278  |
| C | 2.591688  | 1.396849  | -0.422272 |
| C | 2.006808  | 1.508110  | -1.690885 |
| H | 2.620357  | 1.376535  | -2.580467 |
| C | 0.638323  | 1.762287  | -1.834808 |
| H | 0.180019  | 1.825306  | -2.819225 |
| C | -0.168760 | 1.912127  | -0.709550 |
| O | -1.526979 | 2.148570  | -0.852393 |
| C | 0.405867  | 1.852747  | 0.574572  |
| O | -0.357442 | 1.967724  | 1.707817  |
| C | -0.875515 | 3.276793  | 1.966394  |
| H | -1.506583 | 3.634017  | 1.143822  |
| H | -0.057356 | 3.992559  | 2.135989  |
| H | -1.476460 | 3.191855  | 2.877289  |
| C | -4.241951 | -0.927835 | -0.100137 |
| H | -4.970324 | -1.714182 | 0.091543  |
| C | -2.933051 | -1.269689 | -0.469945 |
| C | -2.509273 | -2.720243 | -0.604823 |
| H | -1.822048 | -2.820211 | -1.455780 |
| H | -3.391865 | -3.325755 | -0.852696 |
| C | -1.852965 | -3.336092 | 0.657035  |
| H | -1.704225 | -4.409438 | 0.462148  |
| H | -2.568607 | -3.271435 | 1.489806  |
| C | -2.015724 | -0.238253 | -0.720548 |
| H | -1.002545 | -0.479188 | -1.026550 |
| C | -2.394744 | 1.099460  | -0.589756 |
| C | -3.704019 | 1.436918  | -0.236264 |
| H | -3.984762 | 2.484230  | -0.157932 |
| C | -4.621056 | 0.413715  | 0.006967  |
| H | -5.643054 | 0.667393  | 0.282988  |
| C | -0.517453 | -2.716167 | 1.106090  |
| H | -0.208313 | -3.212781 | 2.038844  |
| H | -0.673352 | -1.659423 | 1.366453  |
| C | 0.625988  | -2.816958 | 0.084191  |
| C | 1.948975  | -2.213962 | 0.587093  |
| C | 2.980508  | -2.021881 | -0.535065 |
| H | 2.559597  | -1.341893 | -1.289180 |
| H | 3.131105  | -2.984163 | -1.049631 |
| C | 4.360944  | -1.509921 | -0.083893 |
| H | 5.026228  | -1.485975 | -0.961414 |
| H | 4.800141  | -2.251264 | 0.602123  |
| H | 2.370861  | -2.854844 | 1.377882  |
| H | 1.738219  | -1.244584 | 1.059254  |
| H | 0.338869  | -2.300647 | -0.843369 |
| H | 0.782650  | -3.870672 | -0.197588 |
| C | 4.429952  | -0.135965 | 0.612524  |
| H | 3.813737  | -0.141074 | 1.522229  |
| H | 5.465001  | -0.002097 | 0.959048  |
| C | 4.071634  | 1.101399  | -0.248310 |
| H | 4.541521  | 1.978726  | 0.222094  |
| H | 4.540877  | 1.004316  | -1.237570 |

Sum of electronic and zero-point Energies= -1005.180211  
Sum of electronic and thermal Energies= -1005.157860  
Sum of electronic and thermal Enthalpies= -1005.156916  
Sum of electronic and thermal Free Energies= -1005.231544

#### daec[n=4]-1-TS (benzene)

|   |           |          |           |
|---|-----------|----------|-----------|
| C | -0.120014 | 3.340209 | -0.104315 |
| H | -0.078168 | 4.389861 | -0.383374 |

|   |           |           |           |
|---|-----------|-----------|-----------|
| C | 1.057369  | 2.569481  | -0.171556 |
| C | 0.965186  | 1.229758  | 0.189105  |
| H | 1.831994  | 0.586661  | 0.163099  |
| C | -0.245184 | 0.662380  | 0.572295  |
| H | -0.252445 | -0.386226 | 0.821167  |
| C | -1.419141 | 1.401987  | 0.594072  |
| O | -2.661980 | 0.858023  | 0.906983  |
| C | -1.352429 | 2.778694  | 0.269305  |
| O | -2.529896 | 3.459836  | 0.319904  |
| C | -2.520932 | 4.841268  | -0.004539 |
| H | -3.554427 | 5.180944  | 0.112511  |
| H | -2.200577 | 5.014252  | -1.042674 |
| H | -1.873994 | 5.415019  | 0.675271  |
| C | -3.200497 | -2.888074 | -0.854728 |
| H | -3.275240 | -3.831227 | -1.394052 |
| C | -2.270893 | -2.750737 | 0.186074  |
| C | -1.165449 | -3.759386 | 0.438288  |
| H | -1.528940 | -4.793358 | 0.360019  |
| H | -0.781315 | -3.633471 | 1.460300  |
| C | -0.012463 | -3.539751 | -0.587475 |
| H | 0.083297  | -2.463944 | -0.786304 |
| H | -0.322657 | -3.985218 | -1.542757 |
| C | -2.222118 | -1.530693 | 0.874094  |
| H | -1.572017 | -1.434018 | 1.737917  |
| C | -2.914645 | -0.413520 | 0.400393  |
| C | -3.841701 | -0.552595 | -0.634781 |
| H | -4.392811 | 0.318936  | -0.978679 |
| C | -4.007765 | -1.807661 | -1.228435 |
| H | -4.733808 | -1.927900 | -2.030480 |
| C | 1.364538  | -4.103161 | -0.168253 |
| H | 1.214822  | -5.019241 | 0.422827  |
| H | 1.913183  | -4.417657 | -1.068585 |
| C | 3.914328  | -1.164044 | 0.632317  |
| C | 2.263102  | -3.130105 | 0.629546  |
| H | 3.053049  | -3.715493 | 1.124626  |
| H | 1.681677  | -2.670679 | 1.445224  |
| C | 4.691065  | -0.033839 | -0.112181 |
| H | 4.713495  | -0.250596 | -1.190742 |
| C | 2.941701  | -2.022150 | -0.205105 |
| H | 2.181768  | -1.386991 | -0.682335 |
| H | 3.502090  | -2.490800 | -1.029560 |
| H | 5.738310  | -0.087874 | 0.212877  |
| C | 4.196817  | 1.426860  | 0.116629  |
| H | 5.064492  | 2.064662  | 0.336716  |
| H | 3.587085  | 1.458740  | 1.028852  |
| H | 4.647933  | -1.851964 | 1.078316  |
| H | 3.372420  | -0.729483 | 1.486159  |
| C | 3.424990  | 2.076505  | -1.063099 |
| H | 2.919167  | 1.303798  | -1.658081 |
| H | 4.153817  | 2.539426  | -1.742704 |
| C | 2.381787  | 3.145109  | -0.658194 |
| H | 2.182841  | 3.798085  | -1.520456 |
| H | 2.814041  | 3.803667  | 0.113057  |

Sum of electronic and zero-point Energies= -1044.434652  
Sum of electronic and thermal Energies= -1044.411859  
Sum of electronic and thermal Enthalpies= -1044.410915  
Sum of electronic and thermal Free Energies= -1044.486222

#### daec[n=4]-1-E1 (benzene)

|   |           |          |           |
|---|-----------|----------|-----------|
| C | -1.334466 | 2.377699 | 0.693693  |
| H | -1.868534 | 2.350835 | 1.639308  |
| C | -2.070630 | 2.391550 | -0.505873 |
| C | -1.378872 | 2.451977 | -1.718630 |
| H | -1.930197 | 2.475953 | -2.656454 |
| C | 0.021194  | 2.447917 | -1.739486 |
| H | 0.569611  | 2.470546 | -2.678512 |
| C | 0.740274  | 2.380601 | -0.554081 |
| O | 2.123821  | 2.355766 | -0.577332 |
| C | 0.063948  | 2.366990 | 0.686289  |
| O | 0.852046  | 2.323761 | 1.791171  |

|   |           |           |           |
|---|-----------|-----------|-----------|
| C | 0.223626  | 2.267924  | 3.064408  |
| H | 1.036785  | 2.231269  | 3.795024  |
| H | -0.398232 | 1.367171  | 3.169903  |
| H | -0.390560 | 3.160434  | 3.252216  |
| C | 4.166154  | -1.272804 | -0.314161 |
| H | 4.724538  | -2.205504 | -0.252541 |
| C | 2.778696  | -1.302823 | -0.501134 |
| C | 2.007747  | -2.605983 | -0.587008 |
| H | 2.672565  | -3.413525 | -0.924947 |
| H | 1.225506  | -2.506092 | -1.351967 |
| C | 1.362730  | -3.011226 | 0.757112  |
| H | 0.814740  | -2.150846 | 1.165052  |
| H | 2.165100  | -3.221298 | 1.479272  |
| C | 2.079638  | -0.088675 | -0.584462 |
| H | 1.005142  | -0.100109 | -0.744068 |
| C | 2.752436  | 1.130405  | -0.475980 |
| C | 4.139979  | 1.157199  | -0.291718 |
| H | 4.646532  | 2.115954  | -0.214621 |
| C | 4.836181  | -0.047857 | -0.213113 |
| H | 5.915557  | -0.031505 | -0.072052 |
| C | 0.430914  | -4.235266 | 0.676525  |
| H | 0.990458  | -5.085753 | 0.257033  |
| H | 0.161549  | -4.528738 | 1.702949  |
| C | -3.148014 | -2.861309 | -0.335288 |
| C | -0.867954 | -4.048842 | -0.134208 |
| H | -1.412279 | -5.005911 | -0.131865 |
| H | -0.629788 | -3.846889 | -1.189551 |
| C | -3.993350 | -1.638949 | 0.077436  |
| H | -3.984461 | -1.555874 | 1.176167  |
| C | -1.795603 | -2.943481 | 0.393474  |
| H | -1.284747 | -1.973522 | 0.321253  |
| H | -1.980793 | -3.105894 | 1.467739  |
| H | -5.044331 | -1.803560 | -0.203092 |
| C | -3.505842 | -0.317270 | -0.541609 |
| H | -3.749410 | -0.309073 | -1.615866 |
| H | -2.410614 | -0.268297 | -0.483542 |
| H | -3.714456 | -3.783649 | -0.137236 |
| H | -2.981127 | -2.836580 | -1.424052 |
| C | -4.084105 | 0.935780  | 0.130620  |
| H | -3.834142 | 0.909641  | 1.202131  |
| H | -5.183156 | 0.920924  | 0.076198  |
| C | -3.583202 | 2.270161  | -0.473451 |
| H | -4.017465 | 3.098730  | 0.105980  |
| H | -3.969611 | 2.372628  | -1.496694 |

Sum of electronic and zero-point Energies= -1044.471037  
Sum of electronic and thermal Energies= -1044.447458  
Sum of electronic and thermal Enthalpies= -1044.446514  
Sum of electronic and thermal Free Energies= -1044.524375

#### daec[n=4]-1-E2 (benzene)

|   |           |           |           |
|---|-----------|-----------|-----------|
| C | -1.177832 | 2.563937  | -0.650974 |
| H | -1.641341 | 2.696563  | -1.624397 |
| C | -2.002018 | 2.439733  | 0.479902  |
| C | -1.403009 | 2.289747  | 1.736442  |
| H | -2.020241 | 2.213443  | 2.629615  |
| C | -0.012595 | 2.198846  | 1.850088  |
| H | 0.464483  | 2.050954  | 2.816314  |
| C | 0.794185  | 2.273212  | 0.720059  |
| O | 2.168067  | 2.166059  | 0.847529  |
| C | 0.217133  | 2.491990  | -0.547955 |
| O | 1.083652  | 2.585718  | -1.589249 |
| C | 0.551582  | 2.762919  | -2.895039 |
| H | 1.415861  | 2.806200  | -3.563984 |
| H | -0.016247 | 3.700897  | -2.976629 |
| H | -0.090777 | 1.920075  | -3.188556 |
| C | 4.113751  | -1.407782 | -0.074158 |
| H | 4.647020  | -2.327667 | -0.308349 |
| C | 2.718326  | -1.365847 | -0.178946 |
| C | 1.904833  | -2.579134 | -0.588385 |
| H | 2.551655  | -3.308267 | -1.096309 |

|   |           |           |           |
|---|-----------|-----------|-----------|
| H | 1.150837  | -2.267692 | -1.324820 |
| C | 1.202640  | -3.267329 | 0.602982  |
| H | 0.668008  | -2.509247 | 1.191404  |
| H | 1.972957  | -3.674469 | 1.273989  |
| C | 2.051486  | -0.168461 | 0.124191  |
| H | 0.968928  | -0.125780 | 0.046037  |
| C | 2.764427  | 0.964620  | 0.520398  |
| C | 4.160394  | 0.920040  | 0.622180  |
| H | 4.698563  | 1.813379  | 0.929052  |
| C | 4.823889  | -0.268808 | 0.324445  |
| H | 5.909227  | -0.306925 | 0.400531  |
| C | 0.235641  | -4.400107 | 0.209494  |
| H | 0.785102  | -5.155663 | -0.373352 |
| H | -0.088713 | -4.907831 | 1.130956  |
| C | -3.242947 | -2.679118 | -0.600804 |
| C | -1.018532 | -3.980248 | -0.584073 |
| H | -1.597127 | -4.888556 | -0.813216 |
| H | -0.726226 | -3.562547 | -1.559521 |
| C | -4.063298 | -1.535496 | 0.030321  |
| H | -4.112637 | -1.690931 | 1.119908  |
| C | -1.928060 | -2.976119 | 0.140865  |
| H | -1.380252 | -2.037281 | 0.300196  |
| H | -2.165765 | -3.358703 | 1.146586  |
| H | -5.102137 | -1.584855 | -0.328827 |
| C | -3.493357 | -0.137329 | -0.263342 |
| H | -3.642264 | 0.095696  | -1.330026 |
| H | -2.406858 | -0.146507 | -0.107064 |
| H | -3.850774 | -3.596037 | -0.625661 |
| H | -3.026399 | -2.431797 | -1.652556 |
| C | -4.098947 | 0.978780  | 0.599053  |
| H | -3.945732 | 0.730779  | 1.660075  |
| H | -5.188438 | 1.022140  | 0.449294  |
| C | -3.510338 | 2.384715  | 0.323161  |
| H | -3.986332 | 3.101489  | 1.007980  |
| H | -3.782246 | 2.698338  | -0.694344 |

Sum of electronic and zero-point Energies= -1044.471085  
Sum of electronic and thermal Energies= -1044.447504  
Sum of electronic and thermal Enthalpies= -1044.446560  
Sum of electronic and thermal Free Energies= -1044.524227

#### daec[n=4]-2-TS (benzene)

|   |           |           |           |
|---|-----------|-----------|-----------|
| C | 2.907448  | 1.812307  | 0.030219  |
| H | 3.853357  | 2.305635  | 0.237935  |
| C | 2.884922  | 0.409554  | -0.111541 |
| C | 1.656082  | -0.178990 | -0.383141 |
| H | 1.568610  | -1.242424 | -0.536441 |
| C | 0.486065  | 0.569671  | -0.460429 |
| H | -0.438170 | 0.037189  | -0.616279 |
| C | 0.499223  | 1.949258  | -0.319667 |
| O | -0.627190 | 2.755740  | -0.391251 |
| C | 1.743309  | 2.587417  | -0.084111 |
| O | 1.700101  | 3.943475  | 0.033216  |
| C | 2.913629  | 4.633424  | 0.287005  |
| H | 3.644575  | 4.483216  | -0.521240 |
| H | 3.363189  | 4.328726  | 1.243759  |
| H | 2.648279  | 5.693739  | 0.337662  |
| C | -4.255354 | 0.895837  | 0.498586  |
| H | -5.164646 | 0.376982  | 0.797440  |
| C | -3.498459 | 0.416676  | -0.582975 |
| C | -3.803825 | -0.906899 | -1.263972 |
| H | -3.098500 | -1.051391 | -2.093357 |
| H | -4.807851 | -0.888603 | -1.713913 |
| C | -3.752276 | -2.124869 | -0.299855 |
| H | -3.964850 | -3.031054 | -0.887146 |
| H | -4.594233 | -2.022474 | 0.399586  |
| C | -2.353805 | 1.131083  | -0.956145 |
| H | -1.800026 | 0.824022  | -1.837771 |
| C | -1.866300 | 2.174670  | -0.160352 |
| C | -2.620287 | 2.645294  | 0.915136  |
| H | -2.240718 | 3.469737  | 1.513206  |

|   |           |           |           |
|---|-----------|-----------|-----------|
| C | -3.835681 | 2.020709  | 1.213584  |
| H | -4.435322 | 2.387852  | 2.044466  |
| C | -2.476160 | -2.346595 | 0.547930  |
| H | -2.140847 | -1.386675 | 0.965892  |
| H | -2.776092 | -2.952226 | 1.416641  |
| C | 0.953422  | -4.346540 | 0.480995  |
| C | -1.279299 | -3.069064 | -0.109167 |
| H | -0.850967 | -2.459777 | -0.919466 |
| H | -1.635286 | -3.998435 | -0.581957 |
| C | 2.095451  | -3.699459 | -0.331101 |
| H | 1.665981  | -3.121203 | -1.162849 |
| C | -0.198980 | -3.420712 | 0.940314  |
| H | -0.709670 | -3.922757 | 1.776188  |
| H | 0.209258  | -2.491486 | 1.364846  |
| H | 2.682788  | -4.496096 | -0.812215 |
| C | 3.058453  | -2.809493 | 0.489777  |
| H | 3.666511  | -3.458124 | 1.136751  |
| H | 2.481165  | -2.177854 | 1.176130  |
| H | 0.523424  | -5.171151 | -0.108048 |
| H | 1.391233  | -4.818211 | 1.374310  |
| C | 3.993284  | -1.919101 | -0.384033 |
| H | 4.998837  | -2.360268 | -0.404813 |
| H | 3.645449  | -1.933239 | -1.427174 |
| C | 4.135376  | -0.443556 | 0.058209  |
| H | 4.449529  | -0.413229 | 1.114646  |
| H | 4.964278  | 0.012118  | -0.504101 |

Sum of electronic and zero-point Energies= -1044.441719  
Sum of electronic and thermal Energies= -1044.419145  
Sum of electronic and thermal Enthalpies= -1044.418200  
Sum of electronic and thermal Free Energies= -1044.492382

#### daec[n=4]-2-E1 (benzene)

|   |           |           |           |
|---|-----------|-----------|-----------|
| C | -1.175516 | -2.630097 | -0.502932 |
| H | -1.571953 | -2.953984 | -1.461486 |
| C | -2.073899 | -2.272667 | 0.518794  |
| C | -1.562106 | -1.884411 | 1.760843  |
| H | -2.240911 | -1.625146 | 2.570683  |
| C | -0.180551 | -1.780266 | 1.955907  |
| H | 0.230325  | -1.444060 | 2.905119  |
| C | 0.699052  | -2.078829 | 0.923839  |
| O | 2.061183  | -1.949529 | 1.126869  |
| C | 0.208374  | -2.547717 | -0.314264 |
| O | 1.146000  | -2.858149 | -1.246147 |
| C | 0.705346  | -3.296380 | -2.524138 |
| H | 0.109016  | -2.525443 | -3.033253 |
| H | 0.119417  | -4.224083 | -2.453699 |
| H | 1.614230  | -3.487804 | -3.101661 |
| C | 4.116342  | 1.418536  | -0.219148 |
| H | 4.680805  | 2.283201  | -0.564879 |
| C | 2.750048  | 1.314783  | -0.519172 |
| C | 2.050147  | 2.400483  | -1.316336 |
| H | 1.191279  | 1.970544  | -1.849043 |
| H | 2.739723  | 2.764289  | -2.091013 |
| C | 1.586930  | 3.621247  | -0.483369 |
| H | 1.337745  | 4.435600  | -1.180978 |
| H | 2.440467  | 3.978377  | 0.110935  |
| C | 2.043956  | 0.187859  | -0.073173 |
| H | 0.986850  | 0.093221  | -0.302658 |
| C | 2.692739  | -0.817709 | 0.652185  |
| C | 4.056310  | -0.711025 | 0.944656  |
| H | 4.541550  | -1.505923 | 1.505450  |
| C | 4.758473  | 0.411593  | 0.507075  |
| H | 5.820690  | 0.496699  | 0.729888  |
| C | 0.387189  | 3.389090  | 0.452529  |
| H | 0.593025  | 2.536430  | 1.116796  |
| H | 0.294930  | 4.267142  | 1.110152  |
| C | -3.531843 | 2.957322  | 0.055941  |
| C | -0.958743 | 3.173065  | -0.261633 |
| H | -0.922653 | 2.248110  | -0.854880 |
| H | -1.120766 | 3.990208  | -0.983535 |

|   |           |           |           |
|---|-----------|-----------|-----------|
| C | -3.780207 | 1.635421  | -0.696991 |
| H | -3.076482 | 1.548046  | -1.538741 |
| C | -2.146721 | 3.121755  | 0.713047  |
| H | -2.156925 | 4.054347  | 1.298158  |
| H | -1.981452 | 2.316937  | 1.444450  |
| H | -4.783128 | 1.677238  | -1.149563 |
| C | -3.666498 | 0.380611  | 0.180628  |
| H | -4.359294 | 0.462718  | 1.033833  |
| H | -2.659277 | 0.336930  | 0.613148  |
| H | -3.694470 | 3.793932  | -0.641320 |
| H | -4.299494 | 3.064175  | 0.838167  |
| C | -3.939026 | -0.930401 | -0.572363 |
| H | -5.002577 | -0.988543 | -0.848115 |
| H | -3.376007 | -0.929868 | -1.518147 |
| C | -3.559190 | -2.204961 | 0.224393  |
| H | -4.125170 | -2.228947 | 1.166066  |
| H | -3.870576 | -3.086712 | -0.353566 |

Sum of electronic and zero-point Energies= -1044.470416  
Sum of electronic and thermal Energies= -1044.446923  
Sum of electronic and thermal Enthalpies= -1044.445979  
Sum of electronic and thermal Free Energies= -1044.523441

#### daec[n=4]-2-E2 (benzene)

|   |           |           |           |
|---|-----------|-----------|-----------|
| C | -1.500112 | -2.103431 | 0.755273  |
| H | -2.072836 | -1.900044 | 1.655485  |
| C | -2.184300 | -2.268791 | -0.461705 |
| C | -1.447888 | -2.564986 | -1.614160 |
| H | -1.960506 | -2.718913 | -2.561983 |
| C | -0.051422 | -2.628870 | -1.565566 |
| H | 0.534498  | -2.834747 | -2.458548 |
| C | 0.620813  | -2.399620 | -0.370986 |
| O | 2.003016  | -2.436917 | -0.327827 |
| C | -0.102948 | -2.160927 | 0.816304  |
| O | 0.638903  | -1.981408 | 1.939404  |
| C | -0.038484 | -1.697861 | 3.155748  |
| H | -0.710811 | -2.518150 | 3.445721  |
| H | -0.611250 | -0.761188 | 3.091706  |
| H | 0.743709  | -1.589520 | 3.912603  |
| C | 4.198421  | 1.107185  | -0.372483 |
| H | 4.800764  | 2.014138  | -0.395031 |
| C | 2.857240  | 1.151980  | -0.783152 |
| C | 2.239127  | 2.452765  | -1.263940 |
| H | 1.345986  | 2.234721  | -1.864429 |
| H | 2.949365  | 2.947873  | -1.941690 |
| C | 1.880955  | 3.455492  | -0.140531 |
| H | 1.680525  | 4.433055  | -0.605326 |
| H | 2.767766  | 3.595884  | 0.494377  |
| C | 2.104795  | -0.030839 | -0.757841 |
| H | 1.070270  | -0.016712 | -1.088682 |
| C | 2.681437  | -1.233108 | -0.331716 |
| C | 4.018918  | -1.273207 | 0.071628  |
| H | 4.447330  | -2.218353 | 0.395282  |
| C | 4.768974  | -0.096900 | 0.048450  |
| H | 5.812027  | -0.123094 | 0.359192  |
| C | 0.684482  | 3.076878  | 0.750436  |
| H | 0.838632  | 2.071778  | 1.171171  |
| H | 0.671216  | 3.764847  | 1.609892  |
| C | -3.264095 | 3.039678  | 0.419677  |
| C | -0.688046 | 3.140109  | 0.057055  |
| H | -0.742652 | 2.380159  | -0.735398 |
| H | -0.795008 | 4.113989  | -0.447950 |
| C | -3.634993 | 1.936767  | -0.591351 |
| H | -2.978649 | 2.000220  | -1.472433 |
| C | -1.855416 | 2.955747  | 1.040445  |
| H | -1.779768 | 3.731482  | 1.818087  |
| H | -1.736745 | 1.997594  | 1.568287  |
| H | -4.652693 | 2.135171  | -0.961804 |
| C | -3.565305 | 0.513275  | -0.020112 |
| H | -4.182252 | 0.450468  | 0.891338  |
| H | -2.535138 | 0.308549  | 0.296183  |

|   |           |           |           |
|---|-----------|-----------|-----------|
| H | -3.377978 | 4.018896  | -0.070785 |
| H | -4.001371 | 3.025626  | 1.237561  |
| C | -4.006457 | -0.577462 | -1.007612 |
| H | -5.089707 | -0.501420 | -1.184873 |
| H | -3.521838 | -0.407011 | -1.980764 |
| C | -3.677352 | -2.020057 | -0.543171 |
| H | -4.144856 | -2.203426 | 0.434801  |
| H | -4.133439 | -2.728166 | -1.248753 |

Sum of electronic and zero-point Energies= -1044.470389  
Sum of electronic and thermal Energies= -1044.446894  
Sum of electronic and thermal Enthalpies= -1044.445950  
Sum of electronic and thermal Free Energies= -1044.523416

#### daec[n=4]-3-TS (benzene)

|   |           |           |           |
|---|-----------|-----------|-----------|
| C | 2.718556  | 2.048329  | -0.086400 |
| H | 3.624915  | 2.635872  | 0.035890  |
| C | 2.818370  | 0.644212  | -0.168802 |
| C | 1.636727  | -0.066982 | -0.328485 |
| H | 1.648987  | -1.140093 | -0.427959 |
| C | 0.396335  | 0.564041  | -0.353018 |
| H | -0.483969 | -0.055871 | -0.419154 |
| C | 0.290382  | 1.944512  | -0.277681 |
| O | -0.906908 | 2.641825  | -0.304951 |
| C | 1.481040  | 2.705522  | -0.155063 |
| O | 1.314481  | 4.055718  | -0.093092 |
| C | 2.469571  | 4.867787  | 0.044609  |
| H | 3.156811  | 4.746148  | -0.805747 |
| H | 3.008505  | 4.654473  | 0.979655  |
| H | 2.106927  | 5.899849  | 0.067601  |
| C | -4.362821 | 0.486309  | 0.606185  |
| H | -5.232013 | -0.099049 | 0.901802  |
| C | -3.579306 | 0.073199  | -0.483904 |
| C | -3.814290 | -1.251738 | -1.188565 |
| H | -3.145563 | -1.318019 | -2.057118 |
| H | -4.839307 | -1.297123 | -1.585762 |
| C | -3.618340 | -2.491477 | -0.272342 |
| H | -3.806243 | -3.390754 | -0.878589 |
| H | -4.412530 | -2.473315 | 0.487949  |
| C | -2.487713 | 0.868367  | -0.853526 |
| H | -1.909456 | 0.603782  | -1.733654 |
| C | -2.083869 | 1.949073  | -0.059946 |
| C | -2.865216 | 2.354231  | 1.022531  |
| H | -2.550496 | 3.207032  | 1.618480  |
| C | -4.024409 | 1.633672  | 1.327851  |
| H | -4.644936 | 1.949048  | 2.164640  |
| C | -2.270620 | -2.643341 | 0.467769  |
| H | -2.037394 | -1.705964 | 0.993484  |
| H | -2.417532 | -3.394677 | 1.258818  |
| C | 1.463290  | -3.718558 | -0.292108 |
| C | -1.050822 | -3.075706 | -0.368931 |
| H | -0.841828 | -2.332107 | -1.153505 |
| H | -1.284290 | -4.013797 | -0.897511 |
| C | 2.780628  | -3.757487 | 0.521973  |
| H | 3.524719  | -4.331008 | -0.052354 |
| C | 0.213869  | -3.272468 | 0.494941  |
| H | 0.002253  | -4.020382 | 1.275380  |
| H | 0.420515  | -2.335581 | 1.031320  |
| H | 2.601040  | -4.338050 | 1.439895  |
| C | 3.409360  | -2.399754 | 0.918554  |
| H | 4.176890  | -2.588612 | 1.683422  |
| H | 2.654991  | -1.777479 | 1.415476  |
| H | 1.279587  | -4.728121 | -0.690117 |
| H | 1.591687  | -3.080948 | -1.179819 |
| C | 4.069536  | -1.620624 | -0.248999 |
| H | 3.547067  | -1.831900 | -1.192605 |
| H | 5.089719  | -2.003978 | -0.391183 |
| C | 4.151592  | -0.087267 | -0.066226 |
| H | 4.847008  | 0.319418  | -0.816340 |
| H | 4.612248  | 0.137747  | 0.909456  |

Sum of electronic and zero-point Energies= -1044.448087



Sum of electronic and thermal Energies= -1044.425773  
Sum of electronic and thermal Enthalpies= -1044.424829  
Sum of electronic and thermal Free Energies= -1044.497892

daec[n=4]-3-E1 (benzene)

|   |           |           |           |
|---|-----------|-----------|-----------|
| C | 1.526379  | 2.216928  | -0.669619 |
| H | 1.952843  | 2.396357  | -1.652892 |
| C | 2.388805  | 1.906550  | 0.397736  |
| C | 1.838862  | 1.702423  | 1.667631  |
| H | 2.488323  | 1.487315  | 2.513466  |
| C | 0.453561  | 1.760513  | 1.857355  |
| H | 0.012893  | 1.592248  | 2.837316  |
| C | -0.394044 | 2.040344  | 0.792597  |
| O | -1.752833 | 2.154402  | 1.022207  |
| C | 0.141315  | 2.299149  | -0.488124 |
| O | -0.758430 | 2.604747  | -1.458761 |
| C | -0.273780 | 2.859882  | -2.770086 |
| H | 0.239784  | 1.982959  | -3.190169 |
| H | 0.405436  | 3.724330  | -2.788819 |
| H | -1.157555 | 3.083046  | -3.374534 |
| C | -4.470044 | -0.838020 | 0.012483  |
| H | -5.204132 | -1.601299 | -0.240827 |
| C | -3.133714 | -1.004864 | -0.377343 |
| C | -2.702880 | -2.245153 | -1.138169 |
| H | -1.921359 | -1.978808 | -1.862466 |
| H | -3.555118 | -2.608031 | -1.728967 |
| C | -2.207997 | -3.414752 | -0.250173 |
| H | -2.117767 | -4.308851 | -0.886203 |
| H | -2.988539 | -3.642045 | 0.490382  |
| C | -2.202890 | -0.005630 | -0.049429 |
| H | -1.165385 | -0.116808 | -0.350181 |
| C | -2.604716 | 1.135018  | 0.651841  |
| C | -3.941472 | 1.298629  | 1.032665  |
| H | -4.231006 | 2.196575  | 1.572726  |
| C | -4.866060 | 0.306987  | 0.710195  |
| H | -5.907236 | 0.431639  | 1.002705  |
| C | -0.874503 | -3.182974 | 0.481982  |
| H | -0.942866 | -2.265067 | 1.083816  |
| H | -0.725691 | -4.002832 | 1.201125  |
| C | 2.879319  | -2.642283 | -0.599297 |
| C | 0.356099  | -3.101601 | -0.435818 |
| H | 0.197004  | -2.335610 | -1.209838 |
| H | 0.472727  | -4.054920 | -0.975944 |
| C | 4.172918  | -2.208288 | 0.118844  |
| H | 5.021178  | -2.315187 | -0.575120 |
| C | 1.652094  | -2.768404 | 0.317901  |
| H | 1.845283  | -3.539244 | 1.081162  |
| H | 1.498997  | -1.829039 | 0.868204  |
| H | 4.368544  | -2.909655 | 0.944463  |
| C | 4.158317  | -0.773007 | 0.680373  |
| H | 5.003390  | -0.650302 | 1.374765  |
| H | 3.253274  | -0.631311 | 1.284982  |
| H | 3.058192  | -3.610803 | -1.090949 |
| H | 2.649984  | -1.935280 | -1.411197 |
| C | 4.241047  | 0.330392  | -0.387895 |
| H | 3.579352  | 0.094011  | -1.233135 |
| H | 5.261891  | 0.358993  | -0.797286 |
| C | 3.873465  | 1.741632  | 0.136495  |
| H | 4.197606  | 2.486932  | -0.603213 |
| H | 4.439575  | 1.946673  | 1.056194  |

Sum of electronic and zero-point Energies= -1044.470400  
Sum of electronic and thermal Energies= -1044.446958  
Sum of electronic and thermal Enthalpies= -1044.446014  
Sum of electronic and thermal Free Energies= -1044.523186

daec[n=4]-3-E2 (benzene)

|   |          |          |           |
|---|----------|----------|-----------|
| C | 1.721358 | 1.917360 | 0.611401  |
| H | 2.280084 | 1.829804 | 1.538432  |
| C | 2.417453 | 1.876086 | -0.609845 |
| C | 1.696419 | 2.032467 | -1.799313 |

|   |           |           |           |
|---|-----------|-----------|-----------|
| H | 2.218131  | 2.020638  | -2.754543 |
| C | 0.308046  | 2.199580  | -1.773250 |
| H | -0.260249 | 2.329140  | -2.691605 |
| C | -0.377290 | 2.205383  | -0.563931 |
| O | -1.741378 | 2.431846  | -0.533490 |
| C | 0.329778  | 2.071988  | 0.650352  |
| O | -0.420277 | 2.110765  | 1.781666  |
| C | 0.237707  | 1.959501  | 3.031913  |
| H | 0.962416  | 2.767349  | 3.208909  |
| H | 0.747697  | 0.988128  | 3.106173  |
| H | -0.549602 | 2.011027  | 3.789460  |
| C | -4.482829 | -0.682507 | -0.151381 |
| H | -5.225595 | -1.474021 | -0.063845 |
| C | -3.196308 | -0.987335 | -0.619550 |
| C | -2.831452 | -2.411001 | -0.997215 |
| H | -2.055311 | -2.397093 | -1.773856 |
| H | -3.709339 | -2.891768 | -1.451006 |
| C | -2.365663 | -3.293977 | 0.186921  |
| H | -2.300090 | -4.333946 | -0.168301 |
| H | -3.149523 | -3.281612 | 0.958169  |
| C | -2.256712 | 0.049059  | -0.735946 |
| H | -1.260022 | -0.163915 | -1.113100 |
| C | -2.600479 | 1.360099  | -0.390632 |
| C | -3.886370 | 1.659120  | 0.069932  |
| H | -4.130716 | 2.686622  | 0.326923  |
| C | -4.820919 | 0.630805  | 0.186942  |
| H | -5.824362 | 0.858299  | 0.542667  |
| C | -1.026407 | -2.894561 | 0.829780  |
| H | -1.072821 | -1.840869 | 1.142401  |
| H | -0.897202 | -3.478062 | 1.754222  |
| C | 2.746987  | -2.773206 | -0.306899 |
| C | 0.206749  | -3.105871 | -0.063292 |
| H | 0.079396  | -2.565378 | -1.013200 |
| H | 0.287677  | -4.171715 | -0.330740 |
| C | 4.049480  | -2.226370 | 0.311447  |
| H | 4.901158  | -2.526808 | -0.318381 |
| C | 1.510890  | -2.634180 | 0.596109  |
| H | 1.676717  | -3.196154 | 1.529402  |
| H | 1.383664  | -1.583339 | 0.893284  |
| H | 4.207459  | -2.714808 | 1.285304  |
| C | 4.082618  | -0.698096 | 0.509104  |
| H | 4.904550  | -0.439807 | 1.193977  |
| H | 3.161951  | -0.382422 | 1.016181  |
| H | 2.892659  | -3.836366 | -0.552078 |
| H | 2.550451  | -2.270253 | -1.266036 |
| C | 4.259138  | 0.108073  | -0.789163 |
| H | 3.638736  | -0.316234 | -1.590845 |
| H | 5.301743  | 0.015242  | -1.127816 |
| C | 3.910712  | 1.612431  | -0.650714 |
| H | 4.343345  | 2.152580  | -1.503744 |
| H | 4.392793  | 2.015763  | 0.251566  |

Sum of electronic and zero-point Energies= -1044.470360  
Sum of electronic and thermal Energies= -1044.446831  
Sum of electronic and thermal Enthalpies= -1044.445886  
Sum of electronic and thermal Free Energies= -1044.523572

daec[n=4]-4-TS (benzene)

|   |           |           |           |
|---|-----------|-----------|-----------|
| C | -1.087030 | -3.251371 | 0.017568  |
| H | -1.297329 | -4.315461 | -0.052248 |
| C | 0.252054  | -2.813466 | -0.044823 |
| C | 0.472183  | -1.446146 | 0.059803  |
| H | 1.472359  | -1.043910 | 0.065173  |
| C | -0.576871 | -0.541117 | 0.169154  |
| H | -0.334816 | 0.508139  | 0.189033  |
| C | -1.896033 | -0.961144 | 0.242853  |
| O | -2.980442 | -0.104634 | 0.379347  |
| C | -2.156204 | -2.353164 | 0.175339  |
| O | -3.466471 | -2.714910 | 0.260854  |
| C | -3.788168 | -4.095114 | 0.195125  |
| H | -4.877052 | -4.151708 | 0.286947  |

|   |           |           |           |
|---|-----------|-----------|-----------|
| H | -3.327266 | -4.660286 | 1.018684  |
| H | -3.484212 | -4.539352 | -0.764368 |
| C | -2.209610 | 3.854869  | -0.695598 |
| H | -1.951065 | 4.848452  | -1.058699 |
| C | -1.472795 | 3.282431  | 0.350276  |
| C | -0.159224 | 3.867471  | 0.843779  |
| H | -0.030531 | 3.647494  | 1.913376  |
| H | -0.143465 | 4.960450  | 0.736278  |
| C | 1.015655  | 3.230892  | 0.046089  |
| H | 1.004926  | 3.628713  | -0.979805 |
| H | 0.807131  | 2.160011  | -0.054410 |
| C | -1.846904 | 2.009366  | 0.807910  |
| H | -1.323653 | 1.572184  | 1.653806  |
| C | -2.780955 | 1.243344  | 0.104020  |
| C | -3.516865 | 1.819083  | -0.934968 |
| H | -4.260678 | 1.222487  | -1.456915 |
| C | -3.251882 | 3.141984  | -1.299487 |
| H | -3.826018 | 3.600382  | -2.102565 |
| C | 2.419780  | 3.393449  | 0.651089  |
| H | 2.711026  | 4.454417  | 0.631757  |
| H | 2.392927  | 3.104750  | 1.713944  |
| C | 4.543194  | 0.208148  | -0.472703 |
| C | 3.512732  | 2.559695  | -0.062982 |
| H | 4.493689  | 2.876027  | 0.323153  |
| H | 3.517041  | 2.804745  | -1.136863 |
| C | 4.545011  | -1.289584 | -0.076423 |
| H | 4.410849  | -1.346942 | 1.014513  |
| C | 3.381283  | 1.033314  | 0.119648  |
| H | 2.436476  | 0.697885  | -0.325313 |
| H | 3.308842  | 0.815227  | 1.975555  |
| H | 5.549012  | -1.694467 | -0.266404 |
| C | 3.490084  | -2.199631 | -0.772223 |
| H | 3.971308  | -2.764540 | -1.583473 |
| H | 2.740426  | -1.578045 | -1.273010 |
| H | 5.491251  | 0.648738  | -0.127416 |
| H | 4.548036  | 0.305537  | -1.569709 |
| C | 2.802350  | -3.201674 | 0.195729  |
| H | 3.486588  | -4.045869 | 0.362292  |
| H | 2.677833  | -2.726276 | 1.179137  |
| C | 1.425855  | -3.768348 | -0.235485 |
| H | 1.232514  | -4.689574 | 0.333091  |
| H | 1.473302  | -4.082576 | -1.291297 |

Sum of electronic and zero-point Energies= -1044.441261  
Sum of electronic and thermal Energies= -1044.418512  
Sum of electronic and thermal Enthalpies= -1044.417568  
Sum of electronic and thermal Free Energies= -1044.492563

#### daec[n=4]-4-E1 (benzene)

|   |           |           |           |
|---|-----------|-----------|-----------|
| C | -0.930352 | -2.378125 | 0.774285  |
| H | -1.408074 | -2.355771 | 1.749550  |
| C | -1.724534 | -2.594503 | -0.365344 |
| C | -1.100484 | -2.648895 | -1.616877 |
| H | -1.691451 | -2.833544 | -2.512174 |
| C | 0.280479  | -2.452295 | -1.731255 |
| H | 0.774483  | -2.482864 | -2.699802 |
| C | 1.054657  | -2.207273 | -0.602675 |
| O | 2.424263  | -2.050053 | -0.722251 |
| C | 0.452656  | -2.188389 | 0.674440  |
| O | 1.288358  | -1.975733 | 1.723607  |
| C | 0.728525  | -1.908232 | 3.027719  |
| H | 1.568778  | -1.719259 | 3.701941  |
| H | 0.244480  | -2.854460 | 3.309395  |
| H | 0.003064  | -1.086556 | 3.114607  |
| C | 4.166231  | 1.685360  | -0.087845 |
| H | 4.642399  | 2.649077  | 0.084899  |
| C | 2.817886  | 1.634399  | -0.461873 |
| C | 1.987341  | 2.892947  | -0.646824 |
| H | 1.653107  | 2.948658  | -1.694821 |
| H | 2.614828  | 3.779065  | -0.478821 |
| C | 0.741606  | 2.944460  | 0.261432  |

|   |           |           |           |
|---|-----------|-----------|-----------|
| H | 1.057466  | 3.022277  | 1.312472  |
| H | 0.220254  | 1.982724  | 0.180050  |
| C | 2.226701  | 0.379323  | -0.679618 |
| H | 1.186389  | 0.314602  | -0.986699 |
| C | 2.960779  | -0.794248 | -0.506235 |
| C | 4.311406  | -0.739666 | -0.144529 |
| H | 4.866421  | -1.665935 | -0.019680 |
| C | 4.904849  | 0.504953  | 0.059379  |
| H | 5.953820  | 0.555896  | 0.346171  |
| C | -0.239363 | 4.083064  | -0.071934 |
| H | 0.171337  | 5.038537  | 0.286134  |
| H | -0.327022 | 4.182200  | -1.165619 |
| C | -3.764318 | 2.358138  | 0.448282  |
| C | -1.647659 | 3.863578  | 0.519458  |
| H | -2.215273 | 4.805323  | 0.479252  |
| H | -1.557341 | 3.607969  | 1.587270  |
| C | -4.376893 | 1.086376  | -0.175046 |
| H | -4.362041 | 1.184934  | -1.272212 |
| C | -2.434507 | 2.761680  | -0.209464 |
| H | -1.799917 | 1.869959  | -0.296514 |
| H | -2.631426 | 3.086692  | -1.243456 |
| H | -5.437366 | 1.007238  | 0.106813  |
| C | -3.645331 | -0.204681 | 0.234408  |
| H | -3.863324 | -0.420546 | 1.292820  |
| H | -2.560893 | -0.044492 | 0.179138  |
| H | -4.478713 | 3.191125  | 0.368929  |
| H | -3.608707 | 2.192980  | 1.526413  |
| C | -3.998546 | -1.427283 | -0.622876 |
| H | -5.077761 | -1.632998 | -0.556361 |
| H | -3.794218 | -1.196109 | -1.679259 |
| C | -3.231986 | -2.716230 | -0.235950 |
| H | -3.589813 | -3.536362 | -0.874472 |
| H | -3.489309 | -2.990821 | 0.796843  |

Sum of electronic and zero-point Energies= -1044.470423  
Sum of electronic and thermal Energies= -1044.446791  
Sum of electronic and thermal Enthalpies= -1044.445847  
Sum of electronic and thermal Free Energies= -1044.523633

#### daec[n=4]-4-E2 (benzene)

|   |           |           |           |
|---|-----------|-----------|-----------|
| C | -0.906120 | -2.716691 | -0.503341 |
| H | -1.424982 | -3.045040 | -1.399735 |
| C | -1.648901 | -2.501706 | 0.671783  |
| C | -0.974148 | -2.097012 | 1.828187  |
| H | -1.527670 | -1.938001 | 2.751388  |
| C | 0.407775  | -1.882540 | 1.805315  |
| H | 0.939821  | -1.560613 | 2.697730  |
| C | 1.131140  | -2.070529 | 0.633816  |
| O | 2.503858  | -1.887351 | 0.626606  |
| C | 0.477958  | -2.504943 | -0.539528 |
| O | 1.266136  | -2.673926 | -1.632797 |
| C | 0.655407  | -3.107503 | -2.840267 |
| H | 1.464046  | -3.176505 | -3.573638 |
| H | -0.095136 | -2.387169 | -3.196927 |
| H | 0.186918  | -4.095553 | -2.724768 |
| C | 4.134414  | 1.919263  | 0.146808  |
| H | 4.582383  | 2.905763  | 0.040319  |
| C | 2.788725  | 1.728047  | -0.188653 |
| C | 1.928639  | 2.862525  | -0.719897 |
| H | 1.631484  | 2.628481  | -1.754495 |
| H | 2.526314  | 3.782816  | -0.776000 |
| C | 0.649501  | 3.111851  | 0.104649  |
| H | 0.923446  | 3.464280  | 1.110093  |
| H | 0.145607  | 2.149471  | 0.256824  |
| C | 2.231960  | 0.446855  | -0.041298 |
| H | 1.192230  | 0.274526  | -0.303038 |
| C | 3.000111  | -0.612852 | 0.443083  |
| C | 4.349226  | -0.420075 | 0.766055  |
| H | 4.931639  | -1.259723 | 1.137040  |
| C | 4.906214  | 0.847840  | 0.612439  |
| H | 5.952939  | 1.005474  | 0.866766  |

|   |           |           |           |
|---|-----------|-----------|-----------|
| C | -0.335891 | 4.102609  | -0.542974 |
| H | 0.028499  | 5.130292  | -0.399220 |
| H | -0.357203 | 3.939159  | -1.632271 |
| C | -3.845288 | 2.411850  | 0.156333  |
| C | -1.773191 | 3.973269  | 0.003547  |
| H | -2.358851 | 4.859255  | -0.284035 |
| H | -1.744828 | 3.970720  | 1.104753  |
| C | -4.387086 | 1.012060  | -0.201666 |
| H | -4.294756 | 0.863152  | -1.289486 |
| C | -2.485202 | 2.705864  | -0.497207 |
| H | -1.825091 | 1.842518  | -0.340384 |
| H | -2.621830 | 2.779990  | -1.587910 |
| H | -5.463564 | 0.961005  | 0.019170  |
| C | -3.663216 | -0.128691 | 0.536730  |
| H | -3.970038 | -0.124400 | 1.594783  |
| H | -2.582333 | 0.062579  | 0.539880  |
| H | -4.571021 | 3.180091  | -0.149715 |
| H | -3.756145 | 2.496200  | 1.251053  |
| C | -3.907063 | -1.519319 | -0.064245 |
| H | -4.983280 | -1.749474 | -0.054946 |
| H | -3.605415 | -1.509718 | -1.122856 |
| C | -3.158030 | -2.663123 | 0.662154  |
| H | -3.426140 | -3.614477 | 0.180051  |
| H | -3.518606 | -2.727189 | 1.698170  |

Sum of electronic and zero-point Energies= -1044.469833  
Sum of electronic and thermal Energies= -1044.446150  
Sum of electronic and thermal Enthalpies= -1044.445206  
Sum of electronic and thermal Free Energies= -1044.523569

#### daec[n=5]-1-TS (benzene)

|   |           |           |           |
|---|-----------|-----------|-----------|
| C | 2.901044  | 1.986167  | -0.249376 |
| H | 3.829137  | 2.527277  | -0.087664 |
| C | 2.960142  | 0.611710  | -0.542632 |
| C | 1.753371  | -0.056997 | -0.746854 |
| H | 1.745705  | -1.109185 | -1.007260 |
| C | 0.528247  | 0.601176  | -0.625921 |
| H | -0.380748 | 0.029364  | -0.749154 |
| C | 0.471138  | 1.962262  | -0.342697 |
| O | -0.684337 | 2.710695  | -0.225778 |
| C | 1.682467  | 2.671495  | -0.159708 |
| O | 1.558203  | 3.999465  | 0.112888  |
| C | 2.742017  | 4.756092  | 0.311742  |
| H | 3.385344  | 4.748546  | -0.580514 |
| H | 2.410824  | 5.780714  | 0.505905  |
| H | 3.317114  | 4.393856  | 1.176799  |
| C | -4.389229 | 1.009374  | 0.660432  |
| H | -5.346013 | 0.565362  | 0.929899  |
| C | -3.694195 | 0.541181  | -0.465573 |
| C | -4.186323 | -0.649366 | -1.268597 |
| H | -3.511687 | -0.806628 | -2.120307 |
| H | -5.176912 | -0.436868 | -1.697773 |
| C | -4.301211 | -1.955126 | -0.439326 |
| H | -5.136328 | -1.840641 | 0.266827  |
| C | -3.058719 | -2.376956 | 0.368622  |
| H | -3.361964 | -3.187992 | 1.048315  |
| H | -2.754561 | -1.543984 | 1.018590  |
| C | -1.838288 | -2.861413 | -0.433374 |
| H | -1.530725 | -2.097491 | -1.163919 |
| H | -2.116808 | -3.749650 | -1.022882 |
| H | -4.594953 | -2.767091 | -1.121824 |
| C | -2.477411 | 1.150089  | -0.801273 |
| H | -1.966530 | 0.849446  | -1.710726 |
| C | -1.908973 | 2.121273  | 0.031455  |
| C | -2.604422 | 2.578791  | 1.153088  |
| H | -2.155230 | 3.346723  | 1.777413  |
| C | -3.855956 | 2.032958  | 1.447360  |
| H | -4.406528 | 2.392610  | 2.314689  |
| C | 1.743559  | -4.131345 | 0.728051  |
| C | -0.648921 | -3.199123 | 0.484487  |
| H | -0.331154 | -2.281410 | 1.001625  |

|   |           |           |           |
|---|-----------|-----------|-----------|
| H | -0.995172 | -3.883236 | 1.275873  |
| C | 2.609906  | -2.906692 | 1.099363  |
| H | 3.092046  | -3.086561 | 2.071945  |
| C | 0.556246  | -3.846354 | -0.219298 |
| H | 0.886644  | -3.214301 | -1.058244 |
| H | 0.228315  | -4.793665 | -0.673803 |
| H | 1.971754  | -2.024540 | 1.244389  |
| C | 3.716202  | -2.590808 | 0.073680  |
| H | 3.293563  | -2.560345 | -0.940599 |
| H | 4.413708  | -3.441253 | 0.064657  |
| H | 2.392674  | -4.896471 | 0.275201  |
| H | 1.345017  | -4.586863 | 1.647167  |
| C | 4.513566  | -1.284499 | 0.351578  |
| H | 4.306755  | -0.933795 | 1.373087  |
| H | 5.587626  | -1.515713 | 0.327560  |
| C | 4.292563  | -0.111186 | -0.638131 |
| H | 4.429969  | -0.494382 | -1.661710 |
| H | 5.097265  | 0.620667  | -0.483037 |

Sum of electronic and zero-point Energies= -1083.737061  
Sum of electronic and thermal Energies= -1083.712976  
Sum of electronic and thermal Enthalpies= -1083.712032  
Sum of electronic and thermal Free Energies= -1083.790409

#### daec[n=5]-1-E1 (benzene)

|   |           |           |           |
|---|-----------|-----------|-----------|
| C | 1.133811  | 2.466397  | -0.760917 |
| H | 1.591080  | 2.595567  | -1.737859 |
| C | 1.961438  | 2.419701  | 0.372969  |
| C | 1.367300  | 2.264679  | 1.631940  |
| H | 1.984462  | 2.240806  | 2.527796  |
| C | -0.018539 | 2.142533  | 1.750330  |
| H | -0.491997 | 2.027247  | 2.722681  |
| C | -0.832559 | 2.183265  | 0.622729  |
| O | -2.205284 | 2.167268  | 0.786837  |
| C | -0.260445 | 2.360712  | -0.653438 |
| O | -1.130662 | 2.411167  | -1.695719 |
| C | -0.606256 | 2.587118  | -3.004821 |
| H | 0.057934  | 1.758607  | -3.290574 |
| H | -1.472825 | 2.599437  | -3.672107 |
| H | -0.063833 | 3.538842  | -3.098598 |
| C | -4.588840 | -1.184143 | 0.141585  |
| H | -5.240090 | -2.041211 | -0.022597 |
| C | -3.244814 | -1.250901 | -0.253079 |
| C | -2.707613 | -2.513578 | -0.901086 |
| H | -1.955405 | -2.250836 | -1.656804 |
| H | -3.529489 | -2.997719 | -1.446054 |
| C | -2.114084 | -3.552193 | 0.084405  |
| H | -2.833089 | -3.707186 | 0.901678  |
| C | -0.737044 | -3.204466 | 0.677343  |
| H | -0.509679 | -3.930124 | 1.473236  |
| H | -0.781118 | -2.221478 | 1.169429  |
| C | 0.407157  | -3.218038 | -0.348210 |
| H | 0.205893  | -2.480897 | -1.140230 |
| H | 0.431271  | -4.198341 | -0.850957 |
| H | -2.036321 | -4.515388 | -0.442926 |
| C | -2.419538 | -0.133663 | -0.042981 |
| H | -1.378178 | -0.164170 | -0.350217 |
| C | -2.937203 | 1.025046  | 0.544282  |
| C | -4.281261 | 1.086937  | 0.929807  |
| H | -4.658856 | 2.001651  | 1.379767  |
| C | -5.099295 | -0.022441 | 0.727091  |
| H | -6.145731 | 0.022539  | 1.023819  |
| C | 4.307137  | -2.547878 | -0.290748 |
| C | 1.789485  | -2.921177 | 0.252097  |
| H | 1.737285  | -1.978534 | 0.816627  |
| H | 2.050505  | -3.701068 | 0.985268  |
| C | 4.471056  | -1.268933 | 0.552100  |
| H | 5.535287  | -1.158701 | 0.812329  |
| C | 2.887473  | -2.827353 | -0.818657 |
| H | 2.607674  | -2.048724 | -1.544234 |
| H | 2.910923  | -3.768413 | -1.389731 |

|   |          |           |           |
|---|----------|-----------|-----------|
| H | 3.942020 | -1.388460 | 1.509525  |
| C | 3.975661 | 0.018867  | -0.122064 |
| H | 2.898232 | -0.065145 | -0.317998 |
| H | 4.456546 | 0.136761  | -1.106553 |
| H | 4.990332 | -2.498229 | -1.152871 |
| H | 4.643683 | -3.405899 | 0.311506  |
| C | 4.230916 | 1.274015  | 0.725421  |
| H | 3.947563 | 1.070413  | 1.768703  |
| H | 5.308198 | 1.496396  | 0.742481  |
| C | 3.471041 | 2.528302  | 0.239649  |
| H | 3.732842 | 2.733422  | -0.807861 |
| H | 3.822528 | 3.394513  | 0.819892  |

Sum of electronic and zero-point Energies= -1083.755237

Sum of electronic and thermal Energies= -1083.730421

Sum of electronic and thermal Enthalpies= -1083.729477

Sum of electronic and thermal Free Energies= -1083.810166

daec[n=5]-1-E2 (benzene)

|   |           |           |           |
|---|-----------|-----------|-----------|
| C | 1.223721  | 2.304270  | 0.636953  |
| H | 1.718652  | 2.309713  | 1.603716  |
| C | 2.002813  | 2.394721  | -0.532425 |
| C | 1.353185  | 2.410045  | -1.769503 |
| H | 1.935112  | 2.481717  | -2.686263 |
| C | -0.044214 | 2.338039  | -1.842519 |
| H | -0.558886 | 2.364189  | -0.530318 |
| C | -0.805483 | 2.240872  | -0.685341 |
| O | -2.185038 | 2.276859  | -0.758272 |
| C | -0.170087 | 2.223421  | 0.577546  |
| O | -0.994604 | 2.140162  | 1.653594  |
| C | -0.410155 | 2.091577  | 2.947681  |
| H | 0.155205  | 3.007938  | 3.170907  |
| H | -1.246046 | 2.005374  | 3.647843  |
| H | 0.248811  | 1.218671  | 3.061262  |
| C | -4.569088 | -1.061055 | -0.045269 |
| H | -5.222568 | -1.916119 | 0.121175  |
| C | -3.270965 | -1.267913 | -0.536467 |
| C | -2.787653 | -2.674655 | -0.836501 |
| H | -2.043451 | -2.645758 | -1.643214 |
| H | -3.634919 | -3.257141 | -1.224347 |
| C | -2.207192 | -3.435577 | 0.381353  |
| H | -2.931308 | -3.375772 | 1.206760  |
| C | -0.832816 | -2.955164 | 0.878589  |
| H | -0.611882 | -3.466556 | 1.828178  |
| H | -0.879008 | -1.881784 | 1.116321  |
| C | 0.320359  | -3.214599 | -0.103381 |
| H | 0.144234  | -2.664044 | -1.039678 |
| H | 0.330555  | -4.281404 | -0.379218 |
| H | -2.133763 | -4.500891 | 0.113805  |
| C | -2.446981 | -0.152936 | -0.756206 |
| H | -1.444104 | -0.285791 | -1.154928 |
| C | -2.918923 | 1.137007  | -0.492111 |
| C | -4.215294 | 1.337254  | -0.010266 |
| H | -4.557649 | 2.351080  | 0.180419  |
| C | -5.034297 | 0.230781  | 0.212292  |
| H | -6.046065 | 0.379409  | 0.585620  |
| C | 4.235167  | -2.626537 | -0.094562 |
| C | 1.699308  | -2.818718 | 0.445234  |
| H | 1.652954  | -1.779663 | 0.803576  |
| H | 1.935690  | -3.434951 | 1.327638  |
| C | 4.413484  | -1.231762 | 0.534078  |
| H | 5.470306  | -1.109148 | 0.817736  |
| C | 2.817561  | -2.957715 | -0.599174 |
| H | 2.576212  | -2.319616 | -1.462420 |
| H | 2.821322  | -3.988761 | -0.985343 |
| H | 3.845941  | -1.180588 | 1.475590  |
| C | 3.986568  | -0.058584 | -0.359833 |
| H | 2.928986  | -0.172926 | -0.632384 |
| H | 4.549192  | -0.084055 | -1.306816 |
| H | 4.935596  | -2.734059 | -0.937226 |
| H | 4.538072  | -3.381293 | 0.647636  |

|   |          |          |           |
|---|----------|----------|-----------|
| C | 4.178308 | 1.306791 | 0.315742  |
| H | 3.774690 | 1.261592 | 1.338479  |
| H | 5.251955 | 1.519693 | 0.426734  |
| C | 3.516733 | 2.482711 | -0.434553 |
| H | 3.936267 | 2.552764 | -1.447748 |
| H | 3.792680 | 3.418360 | 0.075787  |

Sum of electronic and zero-point Energies= -1083.755803

Sum of electronic and thermal Energies= -1083.731022

Sum of electronic and thermal Enthalpies= -1083.730078

Sum of electronic and thermal Free Energies= -1083.810510

daec[n=5]-2-TS (benzene)

|   |           |           |           |
|---|-----------|-----------|-----------|
| C | -2.970803 | -1.918318 | -0.188733 |
| H | -3.923706 | -2.393783 | 0.026377  |
| C | -2.951779 | -0.542867 | -0.482838 |
| C | -1.714389 | 0.042878  | -0.754923 |
| H | -1.645448 | 1.093738  | -1.012108 |
| C | -0.534856 | -0.701402 | -0.705995 |
| H | 0.404994  | -0.200086 | -0.894259 |
| C | -0.555607 | -2.060560 | -0.410166 |
| O | 0.563464  | -2.873635 | -0.358712 |
| C | -1.798433 | -2.685642 | -0.156868 |
| O | -1.750423 | -4.017349 | 0.121926  |
| C | -2.971723 | -4.690605 | 0.384083  |
| H | -3.479261 | -4.284628 | 1.271748  |
| H | -2.701586 | -5.734109 | 0.572248  |
| H | -3.654928 | -4.645158 | -0.476829 |
| C | 4.231691  | -1.254834 | 0.792688  |
| H | 5.173969  | -0.821060 | 1.124319  |
| C | 3.667001  | -0.840853 | -0.423511 |
| C | 4.269978  | 0.296673  | -1.224381 |
| H | 3.859798  | 0.284681  | -2.243859 |
| H | 5.356379  | 0.158587  | -1.320820 |
| C | 4.013063  | 1.685564  | -0.583341 |
| H | 4.523578  | 1.721201  | 0.390934  |
| C | 2.532710  | 2.050214  | -0.376796 |
| H | 2.052805  | 1.269579  | 0.229942  |
| H | 2.014184  | 2.049937  | -1.348121 |
| C | 2.342514  | 3.405026  | 0.328023  |
| H | 2.667831  | 4.220535  | -0.337498 |
| H | 3.020576  | 3.437194  | 1.194892  |
| H | 4.498566  | 2.448455  | -1.210684 |
| C | 2.466488  | -1.432884 | -0.838662 |
| H | 2.042703  | -1.169211 | -1.803830 |
| C | 1.788925  | -2.329720 | -0.006485 |
| C | 2.354656  | -2.736569 | 1.203449  |
| H | 1.820217  | -3.449883 | 1.825465  |
| C | 3.590767  | -2.209687 | 1.585958  |
| H | 4.043880  | -2.529410 | 2.522544  |
| C | -1.515854 | 4.379157  | 0.348244  |
| C | 0.916283  | 3.693308  | 0.837701  |
| H | 0.587590  | 2.853312  | 1.468948  |
| H | 0.963634  | 4.568368  | 1.504631  |
| C | -2.360538 | 3.205368  | 0.908026  |
| H | -2.812666 | 3.492078  | 1.868648  |
| C | -0.143243 | 3.982853  | -0.239871 |
| H | -0.261164 | 3.115091  | -0.906848 |
| H | 0.222083  | 4.804832  | -0.875022 |
| H | -1.709879 | 2.348514  | 1.132931  |
| C | -3.490198 | 2.753517  | -0.037773 |
| H | -3.081623 | 2.583470  | -1.043718 |
| H | -4.189186 | 3.594341  | -0.156635 |
| H | -2.100136 | 4.899401  | -0.425437 |
| H | -1.344469 | 5.125457  | 1.138106  |
| C | -4.274645 | 1.497998  | 0.441889  |
| H | -5.330425 | 1.770362  | 0.577289  |
| H | -3.916514 | 1.192921  | 1.435459  |
| C | -4.239164 | 0.265165  | -0.497667 |
| H | -5.067900 | -0.401574 | -0.222783 |
| H | -4.455283 | 0.602030  | -1.524051 |

Sum of electronic and zero-point Energies= -1083.736308  
 Sum of electronic and thermal Energies= -1083.712189  
 Sum of electronic and thermal Enthalpies= -1083.711245  
 Sum of electronic and thermal Free Energies= -1083.790044

daec[n=5]-2-E1 (benzene)

|   |           |           |           |
|---|-----------|-----------|-----------|
| C | -0.752422 | -2.700471 | -0.702625 |
| H | -1.172393 | -2.973438 | -1.666588 |
| C | -1.611169 | -2.594364 | 0.403495  |
| C | -1.065392 | -2.250830 | 1.647086  |
| H | -1.705052 | -2.178093 | 2.524126  |
| C | 0.301948  | -1.998203 | 1.773226  |
| H | 0.737660  | -1.731206 | 2.733411  |
| C | 1.145411  | -2.094249 | 0.670857  |
| O | 2.507032  | -1.915939 | 0.842363  |
| C | 0.624869  | -2.464110 | -0.585168 |
| O | 1.521756  | -2.549702 | -1.602697 |
| C | 1.047810  | -2.923670 | -2.889178 |
| H | 0.592694  | -3.924445 | -2.877296 |
| H | 1.928821  | -2.936762 | -3.537321 |
| H | 0.321630  | -2.197054 | -3.281715 |
| C | 4.370444  | 1.760014  | 0.242924  |
| H | 4.884402  | 2.708601  | 0.096372  |
| C | 3.112855  | 1.556629  | -0.342779 |
| C | 2.474562  | 2.648297  | -1.182168 |
| H | 2.015003  | 2.202916  | -2.077227 |
| H | 3.269630  | 3.313877  | -1.544649 |
| C | 1.410732  | 3.512928  | -0.463025 |
| H | 1.823542  | 3.884543  | 0.486907  |
| C | 0.070556  | 2.807217  | -0.211607 |
| H | 0.216918  | 1.953028  | 0.465312  |
| H | -0.285315 | 2.386933  | -1.164269 |
| C | -1.003180 | 3.736470  | 0.376505  |
| H | -1.136559 | 4.605233  | -0.288272 |
| H | -0.637423 | 4.140568  | 1.332920  |
| H | 1.227434  | 4.401395  | -1.086621 |
| C | 2.468301  | 0.323792  | -0.149565 |
| H | 1.500966  | 0.142564  | -0.607606 |
| C | 3.072545  | -0.678495 | 0.614425  |
| C | 4.332735  | -0.473056 | 1.187508  |
| H | 4.784289  | -1.271230 | 1.771322  |
| C | 4.973867  | 0.749523  | 0.997460  |
| H | 5.954031  | 0.914765  | 1.441404  |
| C | -4.514619 | 2.081762  | -0.465696 |
| C | -2.369837 | 3.065403  | 0.610630  |
| H | -2.229727 | 2.190508  | 1.263078  |
| H | -3.013889 | 3.761296  | 1.170864  |
| C | -4.609502 | 0.800046  | 0.383400  |
| H | -5.670918 | 0.518545  | 0.465121  |
| C | -3.098259 | 2.649231  | -0.678054 |
| H | -2.492887 | 1.916833  | -1.229376 |
| H | -3.176108 | 3.528322  | -1.337027 |
| H | -4.278173 | 1.010406  | 1.411400  |
| C | -3.813004 | -0.395208 | -0.160807 |
| H | -2.744757 | -0.142116 | -0.195226 |
| H | -4.113390 | -0.597379 | -1.201862 |
| H | -4.961290 | 1.886010  | -1.453040 |
| H | -5.142709 | 2.856191  | 0.001581  |
| C | -3.997275 | -1.666660 | 0.679414  |
| H | -5.047652 | -1.990957 | 0.631083  |
| H | -3.803080 | -1.432188 | 1.736570  |
| C | -3.101371 | -2.849131 | 0.250878  |
| H | -3.380380 | -3.728927 | 0.850536  |
| H | -3.319237 | -3.110802 | -0.794047 |

Sum of electronic and zero-point Energies= -1083.755194  
 Sum of electronic and thermal Energies= -1083.730322  
 Sum of electronic and thermal Enthalpies= -1083.729378  
 Sum of electronic and thermal Free Energies= -1083.810486

daec[n=5]-2-E2 (benzene)

|   |           |           |           |
|---|-----------|-----------|-----------|
| C | -1.687968 | -2.059431 | 0.531294  |
| H | -2.209887 | -2.062813 | 1.483253  |
| C | -2.428933 | -1.935802 | -0.658877 |
| C | -1.741683 | -1.957434 | -1.876744 |
| H | -2.293263 | -1.869086 | -2.810843 |
| C | -0.349935 | -2.113633 | -1.911014 |
| H | 0.185973  | -2.159303 | -2.856430 |
| C | 0.374822  | -2.236618 | -0.732503 |
| O | 1.728017  | -2.519141 | -0.769823 |
| C | -0.297086 | -2.202492 | 0.510751  |
| O | 0.489171  | -2.338311 | 1.610575  |
| C | -0.128453 | -2.298810 | 2.889095  |
| H | -0.644944 | -1.343229 | 3.059837  |
| H | 0.683460  | -2.403623 | 3.614563  |
| H | -0.839943 | -3.126988 | 3.020931  |
| C | 4.646627  | 0.296539  | 0.180378  |
| H | 5.436715  | 1.009056  | 0.412782  |
| C | 3.537907  | 0.715384  | -0.570089 |
| C | 3.440326  | 2.148576  | -1.059763 |
| H | 2.962566  | 2.164984  | -2.050310 |
| H | 4.456486  | 2.542092  | -1.199910 |
| C | 2.668297  | 3.111576  | -0.126780 |
| H | 3.127017  | 3.097228  | 0.873502  |
| C | 1.170410  | 2.802939  | -0.017227 |
| H | 1.033505  | 1.808588  | 0.431825  |
| H | 0.753002  | 2.736621  | -1.032876 |
| C | 0.374848  | 3.831671  | 0.801425  |
| H | 0.435762  | 4.819468  | 0.317018  |
| H | 0.849360  | 3.946889  | 1.788097  |
| H | 2.801155  | 4.133751  | -0.513248 |
| C | 2.535325  | -0.221659 | -0.868883 |
| H | 1.674201  | 0.070843  | -1.464962 |
| C | 2.646720  | -1.542151 | -0.425602 |
| C | 3.757319  | -1.955460 | 0.314325  |
| H | 3.819443  | -2.990052 | 0.641139  |
| C | 4.754405  | -1.027602 | 0.614413  |
| H | 5.623918  | -1.341065 | 1.189588  |
| C | -3.328065 | 2.793323  | -0.152031 |
| C | -1.100168 | 3.437887  | 1.004054  |
| H | -1.125751 | 2.431219  | 1.445779  |
| H | -1.558776 | 4.106991  | 1.748297  |
| C | -3.252115 | 1.268746  | 0.032203  |
| H | -2.765043 | 1.033497  | 0.989406  |
| C | -1.950525 | 3.468860  | -0.278703 |
| H | -1.407035 | 2.979726  | -1.099844 |
| H | -2.084830 | 4.516922  | -0.587743 |
| H | -2.601842 | 0.846197  | -0.746395 |
| C | -4.623973 | 0.580980  | -0.006986 |
| H | -5.069021 | 0.707799  | -1.007028 |
| H | -5.300031 | 1.102292  | 0.689014  |
| H | -3.912143 | 3.013776  | -1.059102 |
| H | -3.889097 | 3.239022  | 0.685231  |
| C | -4.630820 | -0.913214 | 0.363365  |
| H | -5.679405 | -1.232839 | 0.452117  |
| H | -4.198363 | -1.041798 | 1.366826  |
| C | -3.949682 | -1.879502 | -0.632071 |
| H | -4.314552 | -2.893859 | -0.404391 |
| H | -4.311731 | -1.658713 | -1.646325 |

Sum of electronic and zero-point Energies= -1083.751773  
 Sum of electronic and thermal Energies= -1083.726807  
 Sum of electronic and thermal Enthalpies= -1083.725863  
 Sum of electronic and thermal Free Energies= -1083.807232

daec[n=5]-3-TS (benzene)

|   |          |           |           |
|---|----------|-----------|-----------|
| C | 1.681574 | 2.835138  | 0.225592  |
| H | 2.251155 | 3.656734  | 0.651202  |
| C | 2.291539 | 1.570996  | 0.121381  |
| C | 1.537720 | 0.534898  | -0.433541 |
| H | 1.948797 | -0.457948 | -0.534823 |
| C | 0.223229 | 0.739985  | -0.843995 |

|   |           |           |           |
|---|-----------|-----------|-----------|
| H | -0.327171 | -0.089977 | -1.266347 |
| C | -0.397916 | 1.971788  | -0.684603 |
| O | -1.728339 | 2.184531  | -1.025736 |
| C | 0.347827  | 3.049723  | -0.158959 |
| O | -0.310600 | 4.235391  | -0.044269 |
| C | 0.400723  | 5.349862  | 0.472335  |
| H | 0.733053  | 5.177632  | 1.506786  |
| H | -0.304921 | 6.185921  | 0.457300  |
| H | 1.270849  | 5.601757  | -0.151336 |
| C | -4.402820 | -0.493559 | 0.744352  |
| H | -5.075982 | -1.190215 | 1.241597  |
| C | -3.628001 | -0.928425 | -0.343051 |
| C | -3.619306 | -2.378532 | -0.791663 |
| H | -3.042899 | -2.461757 | -1.722593 |
| H | -4.641770 | -2.704775 | -1.033600 |
| C | -3.053916 | -3.359721 | 0.268012  |
| H | -3.736170 | -3.358266 | 1.130568  |
| C | -1.629792 | -3.090750 | 0.794547  |
| H | -1.475847 | -3.740503 | 1.669902  |
| H | -1.570671 | -2.060563 | 1.174524  |
| C | -0.469674 | -3.333794 | -0.187504 |
| H | -0.548617 | -2.649642 | -1.046370 |
| H | -0.546335 | -4.351493 | -0.602960 |
| H | -3.103156 | -4.376065 | -0.151922 |
| C | -2.793253 | 0.001596  | -0.975177 |
| H | -2.237559 | -0.294694 | -1.859908 |
| C | -2.645006 | 1.296703  | -0.468235 |
| C | -3.416825 | 1.722756  | 0.612804  |
| H | -3.296708 | 2.736811  | 0.984992  |
| C | -4.312557 | 0.823994  | 1.200316  |
| H | -4.925158 | 1.148948  | 2.039393  |
| C | 3.491228  | -3.263950 | 0.222072  |
| C | 0.907106  | -3.157424 | 0.482918  |
| H | 0.954260  | -2.154426 | 0.930778  |
| H | 0.985532  | -3.866285 | 1.322841  |
| C | 3.938823  | -1.850755 | 0.658965  |
| H | 4.768158  | -1.949203 | 1.375997  |
| C | 2.106672  | -3.370246 | -0.458239 |
| H | 2.023805  | -4.371754 | -0.907796 |
| H | 2.045249  | -2.664750 | -1.301275 |
| C | 3.124047  | -1.370190 | 1.217339  |
| C | 4.399008  | -0.948657 | -0.502001 |
| H | 3.666106  | -0.979303 | -1.317454 |
| H | 5.316920  | -1.379079 | -0.931321 |
| H | 4.250923  | -3.677921 | -0.458848 |
| H | 3.490210  | -3.921931 | 1.104524  |
| C | 4.707527  | 0.523950  | -1.38646  |
| H | 4.913343  | 1.069062  | -1.071517 |
| H | 5.646049  | 0.545834  | 0.436053  |
| C | 3.678834  | 1.329451  | 0.695852  |
| H | 3.562434  | 0.835657  | 1.673317  |
| H | 4.137116  | 2.302865  | 0.919808  |

Sum of electronic and zero-point Energies= -1083.735222

Sum of electronic and thermal Energies= -1083.711478

Sum of electronic and thermal Enthalpies= -1083.710534

Sum of electronic and thermal Free Energies= -1083.787310

daec[n=5]-3-E1 (benzene)

|   |           |          |           |
|---|-----------|----------|-----------|
| C | 1.719111  | 2.544037 | -0.096496 |
| H | 2.422483  | 3.062288 | -0.741907 |
| C | 2.214092  | 1.688573 | 0.904513  |
| C | 1.299066  | 1.037998 | 1.737958  |
| H | 1.657409  | 0.386614 | 2.532627  |
| C | -0.077360 | 1.230819 | 1.576673  |
| H | -0.787495 | 0.734956 | 2.234228  |
| C | -0.559113 | 2.063711 | 0.572412  |
| O | -1.905124 | 2.334269 | 0.426617  |
| C | 0.344980  | 2.737569 | -0.278374 |
| O | -0.210477 | 3.540585 | -1.223693 |
| C | 0.658875  | 4.243288 | -2.099584 |

|   |           |           |           |
|---|-----------|-----------|-----------|
| H | 1.314951  | 4.935727  | -1.552022 |
| H | 0.008341  | 4.816793  | -2.766419 |
| H | 1.274246  | 3.556301  | -2.698897 |
| C | -4.750945 | -0.679263 | 0.033326  |
| H | -5.516861 | -1.445938 | -0.073388 |
| C | -3.468656 | -0.904021 | -0.492549 |
| C | -3.144260 | -2.212720 | -1.187535 |
| H | -2.358809 | -2.048619 | -1.937026 |
| H | -4.032060 | -2.547710 | -1.741709 |
| C | -2.720307 | -3.354022 | -0.229096 |
| H | -3.494471 | -3.461997 | 0.544374  |
| C | -1.350205 | -3.178938 | 0.449601  |
| H | -1.257661 | -3.932433 | 1.246587  |
| H | -1.311791 | -2.201885 | 0.953233  |
| C | -0.149362 | -3.316348 | -0.499235 |
| H | -0.243253 | -2.601496 | -1.330733 |
| H | -0.166532 | -4.317196 | -0.960045 |
| H | -2.720754 | -4.296572 | -0.797777 |
| C | -2.498867 | 0.099450  | -0.354881 |
| H | -1.504700 | -0.043281 | -0.770856 |
| C | -2.804715 | 1.295334  | 0.305477  |
| C | -4.084358 | 1.515346  | 0.822207  |
| H | -4.299978 | 2.456497  | 1.321565  |
| C | -5.053809 | 0.521659  | 0.678467  |
| H | -6.053828 | 0.688131  | 1.074923  |
| C | 3.781511  | -3.024294 | -0.139267 |
| C | 1.206417  | -3.092183 | 0.187172  |
| H | 1.213236  | -2.088070 | 0.635720  |
| H | 1.318319  | -3.801417 | 1.023229  |
| C | 4.054139  | -1.615314 | 0.422889  |
| H | 5.071173  | -1.606771 | 0.845953  |
| C | 2.395423  | -3.245410 | -0.773334 |
| H | 2.372612  | -4.257609 | -1.206065 |
| H | 2.263786  | -2.557397 | -1.621898 |
| H | 3.377371  | -1.416856 | 1.265508  |
| C | 3.934451  | -0.488742 | -0.615579 |
| H | 2.889580  | -0.392750 | -0.941461 |
| H | 4.507298  | -0.769912 | -1.513280 |
| H | 4.548155  | -3.253245 | -0.895960 |
| H | 3.925802  | -3.758598 | 0.668551  |
| C | 4.439395  | 0.884669  | -0.140783 |
| H | 4.373540  | 1.590469  | -0.981963 |
| H | 5.508989  | 0.812735  | 0.109363  |
| C | 3.708736  | 1.489620  | 1.080017  |
| H | 3.879715  | 0.857647  | 1.960986  |
| H | 4.180561  | 2.457862  | 1.307166  |

Sum of electronic and zero-point Energies= -1083.754696

Sum of electronic and thermal Energies= -1083.729948

Sum of electronic and thermal Enthalpies= -1083.729004

Sum of electronic and thermal Free Energies= -1083.809722

daec[n=5]-3-E2 (benzene)

|   |           |           |           |
|---|-----------|-----------|-----------|
| C | 1.337407  | 1.828950  | 0.965616  |
| H | 1.792772  | 1.524525  | 1.903619  |
| C | 2.171278  | 2.179679  | -0.110148 |
| C | 1.578179  | 2.596086  | -1.308015 |
| H | 2.198224  | 2.886794  | -2.153557 |
| C | 0.185984  | 2.646607  | -1.429969 |
| H | -0.285509 | 2.974221  | -2.353739 |
| C | -0.633118 | 2.294060  | -0.362464 |
| O | -2.000656 | 2.456476  | -0.474866 |
| C | -0.057721 | 1.888272  | 0.860979  |
| O | -0.927795 | 1.588686  | 1.860164  |
| C | -0.401643 | 1.193439  | 3.119903  |
| H | 0.187615  | 0.268715  | 3.041755  |
| H | -1.270180 | 1.012558  | 3.759537  |
| H | 0.217544  | 1.985444  | 3.565161  |
| C | -4.656218 | -0.750108 | -0.430913 |
| H | -5.374029 | -1.568976 | -0.425968 |
| C | -3.319338 | -1.003331 | -0.772928 |

|   |           |           |           |
|---|-----------|-----------|-----------|
| C | -2.870371 | -2.412446 | -1.109746 |
| H | -2.054232 | -2.376197 | -1.843680 |
| H | -3.700588 | -2.938796 | -1.600579 |
| C | -2.430951 | -3.250838 | 0.117461  |
| H | -3.229333 | -3.203934 | 0.871963  |
| C | -1.097676 | -2.832772 | 0.763186  |
| H | -1.004306 | -3.342315 | 1.734424  |
| H | -1.121485 | -1.756316 | 0.988096  |
| C | 0.141181  | -3.159158 | -0.085491 |
| H | 0.036780  | -2.717335 | -1.088009 |
| H | 0.192519  | -4.248660 | -0.242142 |
| H | -2.362524 | -4.304744 | -0.193146 |
| C | -2.411281 | 0.066696  | -0.785689 |
| H | -1.375185 | -0.101410 | -1.068776 |
| C | -2.832851 | 1.355670  | -0.446227 |
| C | -4.167476 | 1.604036  | -0.112934 |
| H | -4.470724 | 2.617267  | 0.138081  |
| C | -5.073497 | 0.544164  | -0.109455 |
| H | -6.115017 | 0.731228  | 0.146258  |
| C | 4.036945  | -2.529481 | 0.213894  |
| C | 1.461308  | -2.668185 | 0.527050  |
| H | 1.403591  | -1.578070 | 0.662369  |
| H | 1.583941  | -3.096109 | 1.535286  |
| C | 4.203857  | -1.001346 | 0.327582  |
| H | 5.214833  | -0.795874 | 0.713724  |
| C | 2.684484  | -3.024731 | -0.331245 |
| H | 2.735372  | -4.119458 | -0.436756 |
| H | 2.533928  | -2.635880 | -1.349397 |
| H | 3.509056  | -0.609341 | 1.083516  |
| C | 4.008326  | -0.245997 | -0.996585 |
| H | 2.958050  | -0.314612 | -1.311790 |
| H | 4.593760  | -0.747428 | -1.783173 |
| H | 4.834411  | -2.920508 | -0.437021 |
| H | 4.209774  | -2.976921 | 1.205153  |
| C | 4.426147  | 1.234198  | -0.965395 |
| H | 4.297227  | 1.654843  | -1.973259 |
| H | 5.502457  | 1.303752  | -0.745279 |
| C | 3.680875  | 2.127555  | 0.051676  |
| H | 3.918745  | 1.799412  | 1.071830  |
| H | 4.087158  | 3.146716  | -0.037722 |

Sum of electronic and zero-point Energies= -1083.755499  
Sum of electronic and thermal Energies= -1083.730716  
Sum of electronic and thermal Enthalpies= -1083.729772  
Sum of electronic and thermal Free Energies= -1083.810283

daec[n=5]-4-TS (benzene)

|   |           |           |           |
|---|-----------|-----------|-----------|
| C | 2.008923  | 2.869176  | 0.026208  |
| H | 2.685008  | 3.652035  | -0.306575 |
| C | 2.511966  | 1.566467  | 0.198045  |
| C | 1.618484  | 0.581121  | 0.615647  |
| H | 1.949094  | -0.437408 | 0.766603  |
| C | 0.273889  | 0.869051  | 0.836997  |
| H | -0.379529 | 0.067190  | 1.148842  |
| C | -0.231853 | 2.147778  | 0.637723  |
| O | -1.566657 | 2.483244  | 0.823229  |
| C | 0.655073  | 3.174271  | 0.238069  |
| O | 0.103184  | 4.406035  | 0.062029  |
| C | 0.953544  | 5.470881  | -0.334706 |
| H | 0.312202  | 6.354953  | -0.400108 |
| H | 1.410230  | 5.283780  | -1.317964 |
| H | 1.746989  | 5.655105  | 0.404469  |
| C | -4.397746 | -0.061747 | -0.901806 |
| H | -5.103558 | -0.727498 | -1.396160 |
| C | -3.646384 | -0.525791 | 0.188249  |
| C | -3.634864 | -1.984070 | 0.605694  |
| H | -4.654847 | -2.375301 | 0.726662  |
| H | -3.151443 | -2.066670 | 1.588620  |
| C | -2.868562 | -2.861651 | -0.427202 |
| H | -3.570545 | -3.164020 | -1.216267 |
| C | -2.184463 | -4.111621 | 0.168695  |

|   |           |           |           |
|---|-----------|-----------|-----------|
| H | -2.103036 | -4.882800 | -0.612042 |
| H | -2.830514 | -4.542258 | 0.948615  |
| C | -0.774403 | -3.863944 | 0.750697  |
| H | -0.480175 | -4.741681 | 1.345966  |
| H | -0.805855 | -3.019848 | 1.458257  |
| H | -2.113488 | -2.242708 | -0.928364 |
| C | -2.765591 | 0.364712  | 0.816481  |
| H | -2.241365 | 0.046092  | 1.711679  |
| C | -2.529624 | 1.636857  | 0.287051  |
| C | -3.278314 | 2.093299  | -0.799745 |
| H | -3.095359 | 3.091853  | -1.188103 |
| C | -4.231362 | 1.245037  | -1.370737 |
| H | -4.824902 | 1.596801  | -2.212693 |
| C | 2.744560  | -3.073700 | -0.875574 |
| C | 0.304110  | -3.602019 | -0.316691 |
| H | 0.322413  | -4.451133 | -1.018669 |
| H | 0.024445  | -2.723284 | -0.916547 |
| C | 4.175682  | -2.724106 | -0.410586 |
| H | 4.848328  | -2.795110 | -1.279531 |
| C | 1.723494  | -3.379025 | 0.237233  |
| H | 2.048479  | -4.269944 | 0.797661  |
| H | 1.699090  | -2.558269 | 0.968993  |
| H | 4.517927  | -3.495592 | 0.296263  |
| C | 4.365786  | -1.336942 | 0.240382  |
| H | 5.374623  | -1.291456 | 0.677780  |
| H | 3.683405  | -1.237005 | 1.093248  |
| H | 2.352192  | -2.261492 | -1.505232 |
| H | 2.803980  | -3.952315 | -1.535964 |
| C | 4.208774  | -0.149802 | -0.738316 |
| H | 3.387985  | -0.341312 | -1.441894 |
| H | 5.120357  | -0.098670 | -1.351173 |
| C | 3.971913  | 1.237705  | -0.086227 |
| H | 4.377522  | 2.017056  | -0.745715 |
| H | 4.559935  | 1.305061  | 0.843795  |

Sum of electronic and zero-point Energies= -1083.734100  
Sum of electronic and thermal Energies= -1083.709997  
Sum of electronic and thermal Enthalpies= -1083.709053  
Sum of electronic and thermal Free Energies= -1083.787447

daec[n=5]-4-E1 (benzene)

|   |           |           |           |
|---|-----------|-----------|-----------|
| C | -1.279847 | 2.272224  | 0.815628  |
| H | -1.760819 | 2.173058  | 1.784810  |
| C | -2.082307 | 2.430322  | -0.330263 |
| C | -1.457193 | 2.580109  | -1.570995 |
| H | -2.057649 | 2.711992  | -2.468839 |
| C | -0.059730 | 2.566737  | -1.669632 |
| H | 0.436873  | 2.689826  | -2.629395 |
| C | 0.725300  | 2.405628  | -0.535628 |
| O | 2.102079  | 2.487854  | -0.633772 |
| C | 0.115193  | 2.259314  | 0.731211  |
| O | 0.961094  | 2.123665  | 1.784994  |
| C | 0.401244  | 1.958409  | 3.080425  |
| H | 1.251764  | 1.860077  | 3.761039  |
| H | -0.217608 | 1.051499  | 3.141133  |
| H | -0.199248 | 2.830983  | 3.375626  |
| C | 4.554205  | -0.867340 | -0.319621 |
| H | 5.218939  | -1.726805 | -0.249387 |
| C | 3.185384  | -1.064135 | -0.540159 |
| C | 2.589489  | -2.452311 | -0.663367 |
| H | 3.366446  | -3.166302 | -0.970760 |
| H | 1.841205  | -2.444150 | -1.467565 |
| C | 1.932128  | -2.954282 | 0.642409  |
| H | 2.721629  | -3.132663 | 1.386546  |
| C | 1.093827  | -4.235027 | 0.462206  |
| H | 0.880950  | -4.665700 | 1.452619  |
| H | 1.699163  | -4.985008 | -0.069631 |
| C | -0.236787 | -4.030166 | -0.289244 |
| H | -0.631088 | -5.009673 | -0.598388 |
| H | -0.050335 | -3.480062 | -1.223941 |
| H | 1.305616  | -2.153415 | 1.059123  |

|   |           |           |           |
|---|-----------|-----------|-----------|
| C | 2.344399  | 0.056295  | -0.634806 |
| H | 1.281602  | -0.080142 | -0.819748 |
| C | 2.864477  | 1.345109  | -0.506426 |
| C | 4.233880  | 1.539207  | -0.290085 |
| H | 4.617107  | 2.552384  | -0.199001 |
| C | 5.069807  | 0.428061  | -0.198429 |
| H | 6.135717  | 0.573857  | -0.031801 |
| C | -3.616040 | -2.142501 | 0.482653  |
| C | -1.315861 | -3.293830 | 0.523027  |
| H | -1.686448 | -3.958288 | 1.319755  |
| H | -0.873596 | -2.427040 | 1.036497  |
| C | -4.640238 | -1.376114 | -0.378584 |
| H | -5.573365 | -1.243932 | 0.190201  |
| C | -2.489558 | -2.797661 | -0.333251 |
| H | -2.907257 | -3.633666 | -0.916583 |
| H | -2.100495 | -2.080880 | -1.072359 |
| H | -4.904009 | -1.996263 | -1.248681 |
| C | -4.156355 | 0.005923  | -0.863454 |
| H | -4.776335 | 0.330960  | -1.712756 |
| H | -3.131380 | -0.074274 | -1.253154 |
| H | -3.176785 | -1.460270 | 1.226644  |
| H | -4.134067 | -2.921234 | 1.062124  |
| C | -4.212885 | 1.090157  | 0.223627  |
| H | -3.711432 | 0.736453  | 1.135995  |
| H | -5.264122 | 1.259458  | 0.501697  |
| C | -3.593872 | 2.443878  | -0.192185 |
| H | -3.876257 | 3.196958  | 0.558504  |
| H | -4.042069 | 2.772066  | -1.140446 |

Sum of electronic and zero-point Energies= -1083.755429  
Sum of electronic and thermal Energies= -1083.730509  
Sum of electronic and thermal Enthalpies= -1083.729565  
Sum of electronic and thermal Free Energies= -1083.810769

#### daec[n=5]-4-E2 (benzene)

|   |           |           |           |
|---|-----------|-----------|-----------|
| C | -1.302607 | 2.526560  | -0.593052 |
| H | -1.804948 | 2.685046  | -1.543022 |
| C | -2.079129 | 2.358763  | 0.565577  |
| C | -1.426999 | 2.172249  | 1.790831  |
| H | -2.008393 | 2.054812  | 2.703506  |
| C | -0.031671 | 2.143033  | 1.854355  |
| H | 0.485794  | 2.006845  | 2.801317  |
| C | 0.731172  | 2.304315  | 0.702578  |
| O | 2.110012  | 2.362583  | 0.799231  |
| C | 0.098157  | 2.505071  | -0.541640 |
| O | 0.920745  | 2.664620  | -1.610520 |
| C | 0.332665  | 2.863608  | -2.888825 |
| H | 1.168265  | 2.959466  | -3.588068 |
| H | -0.270496 | 3.782486  | -2.917945 |
| H | -0.290797 | 2.007847  | -3.185817 |
| C | 4.554058  | -0.899113 | -0.070690 |
| H | 5.216424  | -1.734523 | -0.291366 |
| C | 3.169088  | -1.058777 | -0.195981 |
| C | 2.553187  | -2.378270 | -0.617574 |
| H | 3.312787  | -3.004207 | -1.106455 |
| H | 1.782957  | -2.179025 | -1.375162 |
| C | 1.926695  | -3.166439 | 0.554690  |
| H | 2.733226  | -3.499094 | 1.223928  |
| C | 1.093712  | -4.386079 | 0.114467  |
| H | 0.869087  | -4.999751 | 1.000335  |
| H | 1.709395  | -5.018829 | -0.543247 |
| C | -0.226484 | -4.047071 | -0.605874 |
| H | -0.626113 | -4.962191 | -1.068055 |
| H | -0.023814 | -3.361327 | -1.442239 |
| H | 1.305490  | -2.486342 | 1.153617  |
| C | 2.329448  | 0.030654  | 0.089055  |
| H | 1.252220  | -0.080852 | -0.003655 |
| C | 2.868315  | 1.254679  | 0.487313  |
| C | 4.255088  | 1.412444  | 0.608503  |
| H | 4.652617  | 2.376012  | 0.917279  |
| C | 5.088045  | 0.331624  | 0.329050  |

|   |           |           |           |
|---|-----------|-----------|-----------|
| H | 6.166270  | 0.450702  | 0.420861  |
| C | -3.603550 | -2.266203 | 0.397311  |
| C | -1.309756 | -3.433517 | 0.297843  |
| H | -1.695323 | -4.207601 | 0.980191  |
| H | -0.869624 | -2.657997 | 0.941924  |
| C | -4.599255 | -1.365514 | -0.361602 |
| H | -5.552657 | -1.322957 | 0.186653  |
| C | -2.467924 | -2.803792 | -0.488972 |
| H | -2.882550 | -3.538686 | -1.197373 |
| H | -2.062831 | -1.987665 | -1.106908 |
| H | -4.830659 | -1.833144 | -1.330585 |
| C | -4.095018 | 0.074341  | -0.591748 |
| H | -4.648969 | 0.528565  | -1.427398 |
| H | -3.041214 | 0.051040  | -0.905265 |
| H | -3.173795 | -1.707251 | 1.242762  |
| H | -4.140382 | -3.116739 | 0.843068  |
| C | -4.249213 | 0.977547  | 0.641690  |
| H | -3.831528 | 0.480557  | 1.529102  |
| H | -5.321868 | 1.114955  | 0.845458  |
| C | -3.595444 | 2.372283  | 0.500619  |
| H | -3.976662 | 3.014601  | 1.307279  |
| H | -3.923463 | 2.833235  | -0.441949 |

Sum of electronic and zero-point Energies= -1083.754900  
Sum of electronic and thermal Energies= -1083.729992  
Sum of electronic and thermal Enthalpies= -1083.729048  
Sum of electronic and thermal Free Energies= -1083.810307

#### daec[n=5]-5-TS (benzene)

|   |           |           |           |
|---|-----------|-----------|-----------|
| C | -1.275555 | 3.054958  | -0.480036 |
| H | -1.681952 | 3.941516  | -0.963855 |
| C | -2.067350 | 1.909351  | -0.306386 |
| C | -1.469150 | 0.815779  | 0.331895  |
| H | -2.022487 | -0.096710 | 0.497299  |
| C | -0.141179 | 0.849357  | 0.741202  |
| H | 0.280705  | -0.024489 | 1.220198  |
| C | 0.657812  | 1.964600  | 0.496909  |
| O | 2.013535  | 1.983757  | 0.814258  |
| C | 0.074239  | 3.096969  | -0.100601 |
| O | 0.800734  | 4.219852  | -0.406365 |
| C | 1.328422  | 4.943096  | 0.709433  |
| H | 1.832510  | 5.820471  | 0.290648  |
| H | 2.049886  | 4.343841  | 1.276955  |
| H | 0.519950  | 5.276298  | 1.377338  |
| C | 4.183050  | -1.189199 | -0.823270 |
| H | 4.723254  | -2.013960 | -1.285340 |
| C | 3.394573  | -1.423043 | 0.315185  |
| C | 3.184647  | -2.819906 | 0.871292  |
| H | 2.615436  | -2.750196 | 1.807708  |
| H | 4.153250  | -3.270716 | 1.134164  |
| C | 2.469330  | -3.785644 | -0.108795 |
| H | 3.135255  | -3.955042 | -0.967406 |
| C | 1.096310  | -3.347809 | -0.656954 |
| H | 0.835928  | -4.034804 | -1.476858 |
| H | 1.189233  | -2.354463 | -1.119302 |
| C | -0.075257 | -3.332557 | 0.341074  |
| H | 0.117694  | -2.603525 | 1.143130  |
| H | -0.150121 | -4.314270 | 0.835855  |
| H | 2.370147  | -4.761342 | 0.390974  |
| C | 2.735433  | -0.333463 | 0.898201  |
| H | 2.172534  | -0.475776 | 1.816183  |
| C | 2.766921  | 0.928411  | 0.297506  |
| C | 3.546460  | 1.154932  | -0.835921 |
| H | 3.560652  | 2.144726  | -1.284806 |
| C | 4.272916  | 0.089958  | -1.377709 |
| H | 4.891585  | 0.255957  | -2.257684 |
| C | -3.983805 | -2.691832 | -0.072714 |
| C | -1.416772 | -2.999644 | -0.340931 |
| H | -1.316385 | -2.037114 | -0.862872 |
| H | -1.610980 | -3.748472 | -1.125509 |
| C | -4.214485 | -1.262851 | -0.614045 |



|   |           |           |           |
|---|-----------|-----------|-----------|
| H | -5.053407 | -1.285637 | -1.326173 |
| C | -2.623934 | -2.958052 | 0.613437  |
| H | -2.446501 | -2.210451 | 1.402031  |
| H | -2.689012 | -3.924792 | 1.136056  |
| H | -3.339393 | -0.954070 | -1.201906 |
| C | -4.524810 | -0.219191 | 0.475682  |
| H | -3.798946 | -0.300986 | 1.294062  |
| H | -5.493835 | -0.473547 | 0.932156  |
| H | -4.789834 | -2.932632 | 0.637535  |
| H | -4.093631 | -3.405836 | -0.903188 |
| C | -4.610363 | 1.252331  | 0.003582  |
| H | -4.730730 | 1.889246  | 0.093192  |
| H | -5.535923 | 1.371921  | -0.579894 |
| C | -3.473829 | 1.830696  | -0.877776 |
| H | -3.429914 | 1.251424  | -1.813233 |
| H | -3.780852 | 2.841067  | -1.181163 |

Sum of electronic and zero-point Energies= -1083.733579

Sum of electronic and thermal Energies= -1083.709678

Sum of electronic and thermal Enthalpies= -1083.708733

Sum of electronic and thermal Free Energies= -1083.785961

daec[n=5]-5-E1 (benzene)

|   |           |           |           |
|---|-----------|-----------|-----------|
| C | 1.307815  | 1.775346  | 0.940775  |
| H | 1.723012  | 1.430741  | 1.886021  |
| C | 2.150454  | 2.206639  | -0.093144 |
| C | 1.553530  | 2.659187  | -1.280361 |
| H | 2.175981  | 3.015245  | -2.099361 |
| C | 0.165799  | 2.659477  | -1.432005 |
| H | -0.298810 | 3.008127  | -2.351522 |
| C | -0.659227 | 2.219287  | -0.395619 |
| O | -2.029604 | 2.318094  | -0.547660 |
| C | -0.083830 | 1.782215  | 0.810834  |
| O | -0.856295 | 1.317064  | 1.846114  |
| C | -1.549054 | 2.328829  | 2.584591  |
| H | -2.139887 | 1.804075  | 3.341758  |
| H | -2.217955 | 2.915164  | 1.942191  |
| H | -0.837166 | 3.005164  | 3.080652  |
| C | -4.567445 | -0.983439 | -1.773866 |
| H | -5.254313 | -1.828255 | -0.465039 |
| C | -3.213386 | -1.197694 | -0.778277 |
| C | -2.706038 | -2.599803 | -1.054198 |
| H | -1.877565 | -2.560106 | -1.773866 |
| H | -3.506855 | -3.174184 | -1.539990 |
| C | -2.260226 | -3.374967 | 0.212007  |
| H | -3.073108 | -3.327328 | 0.950868  |
| C | -0.952767 | -2.889984 | 0.863934  |
| H | -0.853200 | -3.375693 | 1.846629  |
| H | -1.017797 | -1.811462 | 1.068472  |
| C | 0.306750  | -3.190323 | 0.036333  |
| H | 0.202354  | -2.765741 | -0.973787 |
| H | 0.392859  | -4.279930 | -0.104973 |
| H | -2.151854 | -4.436707 | -0.058134 |
| C | -2.344224 | -0.096522 | -0.802658 |
| H | -1.294986 | -0.235959 | -1.049754 |
| C | -2.821724 | 1.184192  | -0.511306 |
| C | -4.172711 | 1.394725  | -0.221844 |
| H | -4.521935 | 2.403914  | -0.018066 |
| C | -5.040539 | 0.302748  | -0.208995 |
| H | -6.094852 | 0.459306  | 0.012085  |
| C | 4.176141  | -2.428138 | 0.353402  |
| C | 1.604417  | -2.651625 | 0.656490  |
| H | 1.511057  | -1.562965 | 0.780867  |
| H | 1.730486  | -3.064288 | 1.670397  |
| C | 4.289290  | -0.893032 | 0.433241  |
| H | 5.290417  | -0.643429 | 0.819071  |
| C | 2.844835  | -2.981212 | -0.187977 |
| H | 2.687119  | -2.617854 | -1.214578 |
| H | 2.934898  | -4.075332 | -0.272193 |
| H | 3.577380  | -0.509266 | 1.177161  |
| C | 4.074740  | -0.174531 | -0.908492 |

|   |          |           |           |
|---|----------|-----------|-----------|
| H | 3.029242 | -0.287153 | -1.227177 |
| H | 4.681680 | -0.671872 | -1.681265 |
| H | 4.990832 | -2.806013 | -0.283959 |
| H | 4.357755 | -2.846423 | 1.355668  |
| C | 4.440242 | 1.319650  | -0.907736 |
| H | 4.300758 | 1.714718  | -1.924744 |
| H | 5.512166 | 1.431976  | -0.684086 |
| C | 3.657812 | 2.207267  | 0.086825  |
| H | 3.893377 | 1.903511  | 1.114816  |
| H | 4.032181 | 3.237009  | -0.016939 |

Sum of electronic and zero-point Energies= -1083.752607

Sum of electronic and thermal Energies= -1083.727626

Sum of electronic and thermal Enthalpies= -1083.726682

Sum of electronic and thermal Free Energies= -1083.807809

daec[n=5]-5-E2 (benzene)

|   |           |           |           |
|---|-----------|-----------|-----------|
| C | 1.535112  | 2.751886  | -0.183368 |
| H | 2.137510  | 3.348946  | -0.865193 |
| C | 2.138234  | 1.972745  | 0.809357  |
| C | 1.304112  | 1.229563  | 1.658797  |
| H | 1.737799  | 0.625838  | 2.453631  |
| C | -0.080985 | 1.276226  | 1.512499  |
| H | -0.727259 | 0.719217  | 2.186957  |
| C | -0.671635 | 2.053084  | 0.511766  |
| O | -2.050116 | 2.178583  | 0.439604  |
| C | 0.143720  | 2.805896  | -0.356964 |
| O | -0.294864 | 3.646044  | -1.336603 |
| C | -1.491021 | 3.353456  | -2.062615 |
| H | -1.422014 | 3.942010  | -2.983960 |
| H | -2.387511 | 3.648067  | -1.507939 |
| H | -1.554717 | 2.288640  | -2.323577 |
| C | -4.580999 | -1.117941 | 0.158956  |
| H | -5.267809 | -1.959358 | 0.081789  |
| C | -3.293352 | -1.223064 | -0.389844 |
| C | -2.851095 | -2.504915 | -1.069508 |
| H | -2.104219 | -2.275515 | -1.840995 |
| H | -3.712055 | -2.940186 | -1.595470 |
| C | -2.289215 | -3.577809 | -0.102890 |
| H | -3.029669 | -3.749715 | 0.691696  |
| C | -0.928541 | -3.250782 | 0.537341  |
| H | -0.740151 | -3.976756 | 1.342848  |
| H | -0.979024 | -2.266604 | 1.025802  |
| C | 0.257634  | -3.280749 | -0.439160 |
| H | 0.070820  | -2.595466 | -1.279934 |
| H | 0.333985  | -4.286486 | -0.882910 |
| H | -2.206516 | -4.525864 | -0.656015 |
| C | -2.426726 | -0.124343 | -0.289176 |
| H | -1.428708 | -0.178865 | -0.716283 |
| C | -2.840320 | 1.046584  | 0.356430  |
| C | -4.124855 | 1.147312  | 0.897203  |
| H | -4.424103 | 2.070541  | 1.386804  |
| C | -4.990780 | 0.058091  | 0.791421  |
| H | -5.994215 | 0.130096  | 1.206950  |
| C | 4.144784  | -2.579204 | -0.177629 |
| C | 1.598075  | -2.904496 | 0.210021  |
| H | 1.510444  | -1.896981 | 0.642043  |
| H | 1.801655  | -3.582688 | 1.054469  |
| C | 4.286209  | -1.139220 | 0.353518  |
| H | 5.304676  | -1.022132 | 0.756486  |
| C | 2.775117  | -2.951236 | -0.775986 |
| H | 2.555144  | -2.294611 | -1.631103 |
| H | 2.846839  | -3.967627 | -1.193295 |
| H | 3.608327  | -0.991867 | 1.205794  |
| C | 4.037558  | -0.050553 | -0.702425 |
| H | 2.982840  | -0.064099 | -1.009981 |
| H | 4.619430  | -0.291720 | -1.605885 |
| H | 4.914448  | -2.744776 | -0.947612 |
| H | 4.379261  | -3.279558 | 0.639160  |
| C | 4.412443  | 1.375253  | -0.262782 |
| H | 4.259864  | 2.054650  | -1.114080 |

|   |          |          |           |
|---|----------|----------|-----------|
| H | 5.488318 | 1.414308 | -0.033114 |
| C | 3.647694 | 1.929334 | 0.961423  |
| H | 3.897115 | 1.336068 | 1.850712  |
| H | 4.022328 | 2.944779 | 1.159881  |

Sum of electronic and zero-point Energies= -1083.752098  
Sum of electronic and thermal Energies= -1083.727213  
Sum of electronic and thermal Enthalpies= -1083.726269  
Sum of electronic and thermal Free Energies= -1083.807154

daec[n=5]-6-TS (benzene)

|   |           |           |           |
|---|-----------|-----------|-----------|
| C | 1.903451  | 2.924777  | 0.092175  |
| H | 2.597797  | 3.711684  | -0.189602 |
| C | 2.409925  | 1.642906  | 0.375809  |
| C | 1.492896  | 0.653256  | 0.726846  |
| H | 1.824431  | -0.347293 | 0.970855  |
| C | 0.124201  | 0.909692  | 0.759424  |
| H | -0.547835 | 0.098896  | 1.003351  |
| C | -0.378729 | 2.168664  | 0.454920  |
| O | -1.729930 | 2.481633  | 0.450347  |
| C | 0.528806  | 3.204285  | 0.132743  |
| O | -0.024336 | 4.416672  | -0.146511 |
| C | 0.844093  | 5.488217  | -0.479912 |
| H | 1.415759  | 5.279857  | -1.396508 |
| H | 1.542296  | 5.716636  | 0.338875  |
| H | 0.196663  | 6.353594  | -0.650875 |
| C | -4.341989 | -0.520442 | -0.810006 |
| H | -4.993254 | -1.314069 | -1.173413 |
| C | -3.701397 | -0.660353 | 0.431132  |
| C | -3.784697 | -1.948752 | 1.227314  |
| H | -4.831530 | -2.273047 | 1.317332  |
| H | -3.425068 | -1.766260 | 2.249505  |
| C | -2.973819 | -3.114411 | 0.601617  |
| H | -3.080831 | -3.990716 | 1.259087  |
| C | -1.480107 | -2.835582 | 0.351423  |
| H | -1.001534 | -2.506177 | 1.286509  |
| H | -1.387200 | -1.997380 | -0.353483 |
| C | -0.737623 | -4.059802 | -0.222749 |
| H | -1.401155 | -4.552013 | -0.950688 |
| H | -0.570027 | -4.800205 | 0.575226  |
| H | -3.439608 | -3.394414 | -0.355295 |
| C | -2.890766 | 0.389212  | 0.883442  |
| H | -2.432118 | 0.329069  | 1.866655  |
| C | -2.623396 | 1.490825  | 0.064252  |
| C | -3.262628 | 1.624575  | -1.169136 |
| H | -3.055975 | 2.497162  | -1.783409 |
| C | -4.142346 | 0.622505  | -1.588485 |
| H | -4.652880 | 0.722815  | -2.544543 |
| C | 3.023950  | -3.008180 | -0.936108 |
| C | 0.590567  | -3.759134 | -0.946729 |
| H | 0.900623  | -4.669047 | -1.483947 |
| H | 0.399259  | -3.003804 | -1.725595 |
| C | 4.308988  | -2.607742 | -0.179911 |
| H | 5.145076  | -2.624654 | -0.896649 |
| C | 1.773244  | -3.288980 | -0.080316 |
| H | 2.006267  | -4.058506 | 0.673332  |
| H | 1.487473  | -2.388098 | 0.478724  |
| H | 4.537338  | -3.386675 | 0.564013  |
| C | 4.302050  | -1.240240 | 0.533797  |
| H | 5.223463  | -1.155083 | 1.130108  |
| H | 3.487059  | -1.221222 | 1.266896  |
| H | 3.249725  | -3.915730 | -1.517437 |
| H | 2.776043  | -2.238311 | -1.681925 |
| C | 4.225670  | -0.021984 | -0.412313 |
| H | 3.484933  | -0.198199 | -1.203165 |
| H | 5.195559  | 0.065297  | -0.923751 |
| C | 3.897168  | 1.335554  | 0.266663  |
| H | 4.363384  | 1.361093  | 1.265133  |
| H | 4.374923  | 2.145148  | -0.301354 |

Sum of electronic and zero-point Energies= -1083.738569  
Sum of electronic and thermal Energies= -1083.714569

Sum of electronic and thermal Enthalpies= -1083.713625  
Sum of electronic and thermal Free Energies= -1083.791382

daec[n=5]-6-E1 (benzene)

|   |           |           |           |
|---|-----------|-----------|-----------|
| C | -1.343094 | 2.027137  | 0.772669  |
| H | -1.882414 | 1.798018  | 1.687287  |
| C | -2.071681 | 2.347691  | -0.388747 |
| C | -1.367633 | 2.663916  | -1.553492 |
| H | -1.909559 | 2.919556  | -2.461904 |
| C | 0.033766  | 2.664661  | -1.561859 |
| H | 0.589927  | 2.924556  | -2.459704 |
| C | 0.745668  | 2.345288  | -0.413172 |
| O | 2.123632  | 2.454777  | -0.400686 |
| C | 0.054048  | 2.020209  | 0.776771  |
| O | 0.830354  | 1.736534  | 1.854959  |
| C | 0.189143  | 1.389779  | 3.074309  |
| H | -0.428048 | 0.486271  | 2.964373  |
| H | -0.433485 | 2.213500  | 3.452439  |
| H | 0.994463  | 1.190927  | 3.787181  |
| C | 4.604276  | -0.882143 | -0.158811 |
| H | 5.278482  | -1.735418 | -0.102459 |
| C | 3.359883  | -1.024205 | -0.789820 |
| C | 2.947908  | -2.354749 | -1.391230 |
| H | 3.852124  | -2.897877 | -1.698763 |
| H | 2.366613  | -2.176775 | -2.307836 |
| C | 2.122735  | -3.273518 | -0.459301 |
| H | 2.012996  | -4.246201 | -0.963227 |
| C | 0.730281  | -2.733003 | -0.106536 |
| H | 0.230497  | -2.418969 | -1.034669 |
| H | 0.829413  | -1.825895 | 0.507590  |
| C | -0.153875 | -3.754365 | 0.625893  |
| H | 0.392136  | -4.147608 | 1.497410  |
| H | -0.329406 | -4.617584 | -0.035928 |
| H | 2.691934  | -3.466840 | 0.462460  |
| C | 2.509418  | 0.090539  | -0.861927 |
| H | 1.547564  | 0.010556  | -1.362176 |
| C | 2.897050  | 1.313077  | -0.307735 |
| C | 4.142627  | 1.452588  | 0.311047  |
| H | 4.422475  | 2.417084  | 0.726763  |
| C | 4.990671  | 0.348006  | 0.381325  |
| H | 5.962677  | 0.448698  | 0.861117  |
| C | -3.774717 | -2.163374 | 0.470763  |
| C | -1.507858 | -3.197195 | 1.102886  |
| H | -2.057941 | -3.998629 | 1.620228  |
| H | -1.329568 | -2.415849 | 1.859377  |
| C | -4.616542 | -1.449744 | -0.606043 |
| H | -5.649037 | -1.341295 | -0.239020 |
| C | -2.388451 | -2.615319 | -0.013543 |
| H | -2.512116 | -3.364316 | -0.812791 |
| H | -1.868208 | -1.764593 | -0.472575 |
| H | -4.678536 | -2.100982 | -1.491478 |
| C | -4.096923 | -0.065479 | -1.042543 |
| H | -4.641974 | 0.248811  | -1.945816 |
| H | -3.042486 | -0.139563 | -1.342235 |
| H | -4.331864 | -3.041985 | 0.830193  |
| H | -3.657262 | -1.508254 | 1.347387  |
| C | -4.251231 | 1.027367  | 0.025641  |
| H | -3.836795 | 0.681435  | 0.982794  |
| H | -5.322179 | 1.203614  | 0.207673  |
| C | -3.590165 | 2.372434  | -0.346772 |
| H | -3.971193 | 2.708572  | -1.321227 |
| H | -3.912964 | 3.129007  | 0.384720  |

Sum of electronic and zero-point Energies= -1083.756069  
Sum of electronic and thermal Energies= -1083.731200  
Sum of electronic and thermal Enthalpies= -1083.730256  
Sum of electronic and thermal Free Energies= -1083.810808

daec[n=5]-6-E2 (benzene)

|   |           |          |           |
|---|-----------|----------|-----------|
| C | -1.145085 | 2.630977 | -0.519965 |
| H | -1.588045 | 3.005363 | -1.438470 |

|   |           |           |           |
|---|-----------|-----------|-----------|
| C | -1.991011 | 2.258502  | 0.537329  |
| C | -1.414990 | 1.781842  | 1.722230  |
| H | -2.048212 | 1.499955  | 2.561241  |
| C | -0.027804 | 1.681084  | 1.844702  |
| H | 0.430364  | 1.327841  | 2.765817  |
| C | 0.805088  | 2.056882  | 0.794964  |
| O | 2.176768  | 2.057942  | 0.979369  |
| C | 0.250354  | 2.541098  | -0.406498 |
| O | 1.136178  | 2.888199  | -1.376679 |
| C | 0.627507  | 3.399708  | -2.601018 |
| H | 0.056767  | 4.326671  | -2.446073 |
| H | -0.005556 | 2.663339  | -3.117131 |
| H | 1.503878  | 3.615950  | -3.218798 |
| C | 4.582004  | -1.215906 | 0.064505  |
| H | 5.234270  | -2.058027 | -0.161140 |
| C | 3.297413  | -1.166467 | -0.494323 |
| C | 2.813005  | -2.278725 | -1.405900 |
| H | 3.687276  | -2.771385 | -1.852782 |
| H | 2.242168  | -1.845349 | -2.240574 |
| C | 1.939013  | -3.360688 | -0.726999 |
| H | 1.799276  | -4.177676 | -1.451646 |
| C | 0.562721  | -2.863035 | -0.265075 |
| H | 0.093428  | -2.318700 | -1.097699 |
| H | 0.684834  | -2.131135 | 0.546454  |
| C | -0.377454 | -3.985254 | 0.201496  |
| H | 0.128595  | -4.584823 | 0.973849  |
| H | -0.566658 | -4.671438 | -0.639624 |
| H | 2.486258  | -3.793753 | 0.123797  |
| C | 2.472347  | -0.068252 | -0.199265 |
| H | 1.478593  | -0.005464 | -0.632654 |
| C | 2.925427  | 0.950421  | 0.642818  |
| C | 4.212949  | 0.900210  | 1.190121  |
| H | 4.544674  | 1.709553  | 1.835671  |
| C | 5.033996  | -0.186347 | 0.895670  |
| H | 6.036282  | -0.230036 | 1.318300  |
| C | -3.914011 | -2.208492 | 0.332108  |
| C | -1.721639 | -3.486176 | 0.764522  |
| H | -2.313561 | -4.354228 | 1.093960  |
| H | -1.532327 | -2.886589 | 1.669109  |
| C | -4.687484 | -1.256473 | -0.602458 |
| H | -5.723591 | -1.160823 | -0.242354 |
| C | -2.551009 | -2.650120 | -0.222024 |
| H | -2.707380 | -3.224845 | -1.149706 |
| H | -1.974224 | -1.761644 | -0.509377 |
| H | -4.756484 | -1.722289 | -1.597546 |
| C | -4.081773 | 0.153712  | -0.751649 |
| H | -4.548268 | 0.652820  | -1.614895 |
| H | -3.012664 | 0.076468  | -0.993509 |
| H | -4.531281 | -3.099946 | 0.521197  |
| H | -3.769626 | -1.732437 | 1.313844  |
| C | -4.264912 | 1.046838  | 0.484584  |
| H | -3.951044 | 0.509467  | 1.390106  |
| H | -5.336231 | 1.261583  | 0.615458  |
| C | -3.499834 | 2.387256  | 0.413082  |
| H | -3.748906 | 2.900204  | -0.526628 |
| H | -3.865075 | 3.036686  | 1.222531  |

Sum of electronic and zero-point Energies= -1083.755172  
Sum of electronic and thermal Energies= -1083.730227  
Sum of electronic and thermal Enthalpies= -1083.729283  
Sum of electronic and thermal Free Energies= -1083.810706

#### daec[n=5]-7-TS (benzene)

|   |           |           |           |
|---|-----------|-----------|-----------|
| C | -3.106500 | 1.864256  | 0.103131  |
| H | -3.940771 | 2.526000  | -0.113466 |
| C | -1.812571 | 2.410640  | 0.192748  |
| C | -0.764174 | 1.533634  | 0.465327  |
| H | 0.249833  | 1.895237  | 0.565915  |
| C | -0.981455 | 0.165199  | 0.607337  |
| H | -0.127496 | -0.471131 | 0.786369  |
| C | -2.255409 | -0.380262 | 0.498816  |

|   |           |           |           |
|---|-----------|-----------|-----------|
| O | -2.538717 | -1.734446 | 0.614558  |
| C | -3.344724 | 0.489904  | 0.258983  |
| O | -4.569107 | -0.098418 | 0.170146  |
| C | -5.695679 | 0.731472  | -0.065859 |
| H | -5.624519 | 1.251049  | -1.033020 |
| H | -6.560416 | 0.061243  | -0.082620 |
| H | -5.829974 | 1.473200  | 0.735253  |
| C | 0.371763  | -4.318641 | -0.896075 |
| H | 1.144685  | -4.939157 | -1.347189 |
| C | 0.669158  | -3.552138 | 0.238777  |
| C | 2.084129  | -3.363541 | 0.749291  |
| H | 2.682138  | -4.276361 | 0.622735  |
| H | 2.061728  | -3.143264 | 1.826222  |
| C | 2.763988  | -2.185032 | -0.001668 |
| H | 3.028914  | -2.520900 | -1.015765 |
| C | 4.003797  | -1.610385 | 0.698843  |
| H | 4.680945  | -2.434211 | 0.972951  |
| H | 3.698708  | -1.145202 | 1.648841  |
| C | 4.806062  | -0.605148 | -0.153653 |
| H | 5.157518  | -1.129011 | -1.056228 |
| H | 5.714242  | -0.328530 | 0.404252  |
| H | 2.023427  | -1.385475 | -0.138950 |
| C | -0.352766 | -2.779265 | 0.808692  |
| H | -0.160085 | -2.234623 | 1.728429  |
| C | -1.584099 | -2.637301 | 0.165447  |
| C | -1.879103 | -3.405209 | -0.964141 |
| H | -2.851283 | -3.301627 | -1.439116 |
| C | -0.904296 | -4.269757 | -1.468415 |
| H | -1.128390 | -4.877137 | -2.343431 |
| C | 3.431803  | 3.114153  | 0.048870  |
| C | 4.100845  | 0.693729  | -0.602813 |
| H | 4.784244  | 1.207078  | -1.297256 |
| H | 3.206431  | 0.451932  | -1.194858 |
| C | 2.126345  | 3.293031  | -0.774702 |
| H | 1.689323  | 2.310117  | -0.999051 |
| C | 3.739772  | 1.677257  | 0.526948  |
| H | 4.586907  | 1.729122  | 1.228909  |
| H | 2.889554  | 1.292118  | 1.111499  |
| H | 2.353840  | 3.736560  | -1.754603 |
| C | 1.062660  | 4.168509  | -0.078732 |
| H | 1.473924  | 5.180884  | 0.045550  |
| H | 0.904705  | 3.800991  | 0.944910  |
| H | 4.292983  | 3.469819  | -0.535757 |
| H | 3.388762  | 3.766982  | 0.933441  |
| C | -0.296321 | 4.249646  | -0.836363 |
| H | -0.265808 | 3.598472  | -1.721391 |
| H | -0.425424 | 5.269615  | -1.223111 |
| C | -1.564319 | 3.897566  | -0.016089 |
| H | -1.509923 | 4.409367  | 0.958782  |
| H | -2.439558 | 4.325864  | -0.524103 |

Sum of electronic and zero-point Energies= -1083.728331  
Sum of electronic and thermal Energies= -1083.704217  
Sum of electronic and thermal Enthalpies= -1083.703272  
Sum of electronic and thermal Free Energies= -1083.781811

#### daec[n=5]-7-E1 (benzene)

|   |           |          |           |
|---|-----------|----------|-----------|
| C | -1.301093 | 2.375824 | 0.664995  |
| H | -1.797932 | 2.388994 | 1.630650  |
| C | -2.080532 | 2.389271 | -0.506956 |
| C | -1.429168 | 2.399485 | -1.744044 |
| H | -2.012047 | 2.418354 | -2.662870 |
| C | -0.030093 | 2.395879 | -1.814269 |
| H | 0.484420  | 2.414470 | -2.772370 |
| C | 0.731974  | 2.374802 | -0.653875 |
| O | 2.111200  | 2.454331 | -0.723305 |
| C | 0.095697  | 2.362590 | 0.608183  |
| O | 0.921631  | 2.348730 | 1.686089  |
| C | 0.339222  | 2.299435 | 2.980886  |
| H | -0.276352 | 1.398050 | 3.113552  |
| H | 1.177810  | 2.269195 | 3.682522  |

|   |           |           |           |
|---|-----------|-----------|-----------|
| H | -0.270033 | 3.191782  | 3.185205  |
| C | 4.508126  | -0.889696 | -0.061845 |
| H | 5.156374  | -1.747718 | 0.108046  |
| C | 3.180337  | -1.091225 | -0.457459 |
| C | 2.614149  | -2.482748 | -0.669465 |
| H | 3.415516  | -3.226840 | -0.562665 |
| H | 2.252460  | -2.568513 | -1.706188 |
| C | 1.450876  | -2.832015 | 0.280749  |
| H | 1.820465  | -2.857713 | 1.317266  |
| C | 0.771318  | -4.163127 | -0.068477 |
| H | 1.509593  | -4.976837 | 0.000196  |
| H | 0.455385  | -4.136707 | -1.122208 |
| C | -0.434102 | -4.520040 | 0.822143  |
| H | -0.085308 | -4.659529 | 1.857121  |
| H | -0.824958 | -5.497766 | 0.500193  |
| H | 0.712381  | -2.020412 | 0.243614  |
| C | 2.361014  | 0.028910  | -0.672056 |
| H | 1.330861  | -0.104957 | -0.992041 |
| C | 2.860331  | 1.318325  | -0.487871 |
| C | 4.190996  | 1.517395  | -0.102035 |
| H | 4.558373  | 2.531710  | 0.031454  |
| C | 5.006622  | 0.407457  | 0.108055  |
| H | 6.041599  | 0.554238  | 0.412129  |
| C | -3.453226 | -2.314344 | -0.519911 |
| C | -1.589860 | -3.500005 | -0.830365 |
| H | -2.374219 | -3.876117 | 1.505894  |
| H | -1.242643 | -2.557009 | 1.274456  |
| C | -3.182452 | -0.862763 | -0.090122 |
| H | -2.409532 | -0.428288 | -0.739658 |
| C | -2.214594 | -3.228211 | -0.547883 |
| H | -2.497810 | -4.190422 | -1.002954 |
| H | -1.463451 | -2.786531 | -1.219821 |
| H | -2.769240 | -0.846058 | 0.929224  |
| C | -4.452551 | 0.002455  | -0.124547 |
| H | -5.236124 | -0.519215 | 0.447095  |
| H | -4.828898 | 0.060689  | -1.158560 |
| H | -4.211851 | -2.753377 | 0.148202  |
| H | -3.905284 | -2.305947 | -1.523977 |
| C | -4.329039 | 1.426904  | 0.448502  |
| H | -3.867644 | 1.381868  | 1.446445  |
| H | -5.346646 | 1.811171  | 0.610863  |
| C | -3.595789 | 2.471005  | -0.424336 |
| H | -4.008680 | 2.434826  | -1.442348 |
| H | -3.858203 | 3.466720  | -0.033105 |

Sum of electronic and zero-point Energies= -1083.753972  
Sum of electronic and thermal Energies= -1083.729008  
Sum of electronic and thermal Enthalpies= -1083.728064  
Sum of electronic and thermal Free Energies= -1083.809587

daec[n=5]-7-E2 (benzene)

|   |           |           |           |
|---|-----------|-----------|-----------|
| C | 0.002623  | 2.850677  | -0.698134 |
| H | -0.408004 | 3.131865  | -1.663727 |
| C | -0.788005 | 3.020773  | 0.449954  |
| C | -0.250720 | 2.673564  | 1.695846  |
| H | -0.836541 | 2.816373  | 2.601752  |
| C | 1.030904  | 2.125878  | 1.784654  |
| H | 1.453083  | 1.833572  | 2.743479  |
| C | 1.796777  | 1.932287  | 0.640132  |
| O | 3.068409  | 1.397310  | 0.751676  |
| C | 1.296947  | 2.318326  | -0.619894 |
| O | 2.122679  | 2.113229  | -1.678693 |
| C | 1.660206  | 2.473595  | -2.973271 |
| H | 1.441595  | 3.549129  | -3.039789 |
| H | 2.477088  | 2.229402  | -3.658378 |
| H | 0.766000  | 1.900827  | -3.258748 |
| C | 3.721589  | -2.673876 | 0.139565  |
| H | 3.918440  | -3.734364 | -0.008104 |
| C | 2.453106  | -2.156087 | -0.148360 |
| C | 1.340487  | -3.033986 | -0.691660 |
| H | 1.715877  | -4.058775 | -0.819796 |

|   |           |           |           |
|---|-----------|-----------|-----------|
| H | 1.068752  | -2.682073 | -1.699671 |
| C | 0.062952  | -3.063635 | 0.172071  |
| H | 0.301422  | -3.483906 | 1.160910  |
| C | -1.064637 | -3.875354 | -0.481154 |
| H | -0.706170 | -4.901239 | -0.657979 |
| H | -1.277545 | -3.459336 | -1.477688 |
| C | -2.367374 | -3.954202 | 0.335527  |
| H | -2.144993 | -4.395327 | 1.319581  |
| H | -3.044229 | -4.662868 | -0.166685 |
| H | -0.275759 | -2.034471 | 0.353653  |
| C | 2.220249  | -0.786326 | 0.050601  |
| H | 1.240996  | -0.370927 | -0.166649 |
| C | 3.235407  | 0.046770  | 0.523022  |
| C | 4.506321  | -0.472341 | 0.800413  |
| H | 5.283442  | 0.194397  | 1.165695  |
| C | 4.738193  | -1.832376 | 0.607114  |
| H | 5.722754  | -2.242482 | 0.825364  |
| C | -4.710293 | -0.914248 | -0.577966 |
| C | -3.129050 | -2.630665 | 0.549225  |
| H | -4.026633 | -2.857054 | 1.145850  |
| H | -2.528249 | -1.946616 | 1.165332  |
| C | -4.448727 | 0.285080  | 0.351553  |
| H | -4.173112 | -0.073131 | 1.354996  |
| C | -3.561513 | -1.926897 | -0.750593 |
| H | -3.897152 | -2.689044 | -1.471403 |
| H | -2.696140 | -1.435876 | -1.218721 |
| H | -5.398984 | 0.826463  | 0.480346  |
| C | -3.383953 | 1.278456  | -0.140016 |
| H | -3.622637 | 1.590333  | -1.169902 |
| H | -2.402501 | 0.786217  | -0.189275 |
| H | -5.590529 | -1.456735 | -0.199081 |
| H | -4.996054 | -0.534153 | -1.571359 |
| C | -3.289080 | 2.522424  | 0.756253  |
| H | -3.104382 | 2.208000  | 1.794317  |
| H | -4.262657 | 3.035553  | 0.763780  |
| C | -2.207749 | 3.545229  | 0.340408  |
| H | -2.398048 | 3.876979  | -0.689892 |
| H | -2.315797 | 4.436568  | 0.976167  |

Sum of electronic and zero-point Energies= -1083.755312  
Sum of electronic and thermal Energies= -1083.730398  
Sum of electronic and thermal Enthalpies= -1083.729454  
Sum of electronic and thermal Free Energies= -1083.810658

daec[n=5]-8-TS (benzene)

|   |           |           |           |
|---|-----------|-----------|-----------|
| C | 1.301276  | -3.295791 | 0.219787  |
| H | 1.504898  | -4.357959 | 0.326919  |
| C | -0.041188 | -2.862227 | 0.162301  |
| C | -0.236560 | -1.489015 | 0.019392  |
| H | -1.216596 | -1.052696 | 0.029978  |
| C | 0.820271  | -0.597214 | -0.099464 |
| H | 0.588232  | 0.445700  | -0.260017 |
| C | 2.135530  | -1.013755 | 0.024183  |
| O | 3.212207  | -0.144903 | 0.002390  |
| C | 2.383879  | -2.399405 | 0.175731  |
| O | 3.694942  | -2.760202 | 0.262923  |
| C | 4.003966  | -4.137070 | 0.409601  |
| H | 5.095603  | -4.193726 | 0.458269  |
| H | 3.650719  | -4.727563 | -0.448808 |
| H | 3.579823  | -4.553639 | 1.335251  |
| C | 2.276051  | 3.863585  | -0.683499 |
| H | 2.004474  | 4.893905  | -0.908790 |
| C | 1.690044  | 3.216821  | 0.419439  |
| C | 0.623372  | 3.912889  | 1.249411  |
| H | 0.967637  | 4.931780  | 1.477614  |
| H | 0.514565  | 3.401442  | 2.216082  |
| C | -0.775194 | 4.036004  | 0.576756  |
| H | -1.316019 | 4.842511  | 1.094378  |
| C | -1.670062 | 2.779208  | 0.596357  |
| H | -1.798430 | 2.451305  | 1.640402  |
| H | -1.167767 | 1.953109  | 0.073772  |

|   |           |           |           |
|---|-----------|-----------|-----------|
| C | -3.060754 | 3.040005  | -0.028458 |
| H | -2.946133 | 3.203990  | -1.111571 |
| H | -3.441556 | 3.990000  | 0.377504  |
| H | -0.644119 | 4.378923  | -0.460499 |
| C | 2.083477  | 1.903122  | 0.701397  |
| H | 1.665024  | 1.388527  | 1.562602  |
| C | 2.935655  | 1.207251  | -0.169303 |
| C | 3.515482  | 1.856419  | -1.257436 |
| H | 4.185122  | 1.305649  | -1.912991 |
| C | 3.198487  | 3.198962  | -1.492442 |
| H | 3.653272  | 3.716679  | -2.334897 |
| C | -4.925937 | -0.486947 | -0.107284 |
| C | -4.143936 | 1.962426  | 0.218189  |
| H | -4.216543 | 1.779128  | 1.302315  |
| H | -5.118638 | 2.376924  | -0.081741 |
| C | -4.597939 | -1.921499 | -0.613968 |
| H | -4.765064 | -1.992628 | -1.699602 |
| C | -3.917678 | 0.619735  | -0.499790 |
| H | -2.900565 | 0.290434  | -0.262897 |
| H | -3.938933 | 0.774977  | -1.590479 |
| H | -5.296803 | -2.628568 | -0.142338 |
| C | -3.138600 | -2.252894 | -0.277371 |
| H | -2.969306 | -1.933213 | 0.763239  |
| H | -2.550811 | -1.588378 | -0.907717 |
| H | -5.932519 | -0.200103 | -0.446708 |
| H | -4.977895 | -0.525755 | 0.992550  |
| C | -2.525535 | -3.655724 | -0.442082 |
| H | -3.221080 | -4.429794 | -0.084076 |
| H | -2.350549 | -3.865707 | -1.507469 |
| C | -1.200148 | -3.842919 | 0.362102  |
| H | -0.830694 | -4.861010 | 0.174573  |
| H | -1.470287 | -3.825207 | 1.431349  |

Sum of electronic and zero-point Energies= -1083.724372  
 Sum of electronic and thermal Energies= -1083.700344  
 Sum of electronic and thermal Enthalpies= -1083.699400  
 Sum of electronic and thermal Free Energies= -1083.777033

daec[n=5]-8-E1 (benzene)

|   |           |           |           |
|---|-----------|-----------|-----------|
| C | 1.529501  | -2.345166 | 0.474279  |
| H | 2.093366  | -2.351549 | 1.402363  |
| C | 2.224557  | -2.298672 | -0.749208 |
| C | 1.488680  | -2.312512 | -1.936948 |
| H | 2.005261  | -2.281320 | -2.894278 |
| C | 0.088624  | -2.363072 | -1.909309 |
| H | -0.490485 | -2.387740 | -2.829668 |
| C | -0.591197 | -2.386064 | -0.698653 |
| O | -1.966999 | -2.519573 | -0.670385 |
| C | 0.133353  | -2.384567 | 0.515550  |
| O | -0.613335 | -2.432718 | 1.649677  |
| C | 0.059108  | -2.408131 | 2.900795  |
| H | -0.726891 | -2.439323 | 3.660861  |
| H | 0.647072  | -1.487538 | 3.026567  |
| H | 0.716207  | -3.281207 | 3.024605  |
| C | -4.491381 | 0.639646  | 0.326535  |
| H | -5.186347 | 1.442578  | 0.568188  |
| C | -3.414949 | 0.895850  | -0.537500 |
| C | -3.247227 | 2.276960  | -1.145588 |
| H | -4.247789 | 2.696674  | -1.318792 |
| H | -2.775465 | 2.190105  | -2.135060 |
| C | -2.439965 | 3.289131  | -0.297082 |
| H | -2.661037 | 4.299639  | -0.673025 |
| C | -0.921061 | 3.074687  | -0.333306 |
| H | -0.586101 | 3.113494  | -1.382942 |
| H | -0.685212 | 2.063587  | 0.025524  |
| C | -0.138870 | 4.120270  | 0.480591  |
| H | -0.331470 | 3.967112  | 1.554239  |
| H | -0.531051 | 5.121382  | 0.243040  |
| H | -2.800133 | 3.262903  | 0.742399  |
| C | -2.537233 | -0.155100 | -0.846904 |
| H | -1.705653 | 0.009892  | -1.528304 |

|   |           |           |           |
|---|-----------|-----------|-----------|
| C | -2.746417 | -1.430778 | -0.312098 |
| C | -3.824577 | -1.680858 | 0.538869  |
| H | -3.962657 | -2.683136 | 0.935364  |
| C | -4.693220 | -0.636490 | 0.856912  |
| H | -5.537221 | -0.822431 | 1.518873  |
| C | 3.591015  | 2.804542  | 0.266877  |
| C | 1.379116  | 4.121048  | 0.221478  |
| H | 1.556395  | 4.338069  | -0.844268 |
| H | 1.837531  | 4.952105  | 0.779601  |
| C | 4.282741  | 1.459419  | 0.560492  |
| H | 4.071250  | 1.171634  | 1.603023  |
| C | 2.087876  | 2.810361  | 0.589320  |
| H | 1.599766  | 1.981595  | 0.061013  |
| H | 1.947466  | 2.609024  | 1.663934  |
| H | 5.374046  | 1.587966  | 0.498192  |
| C | 3.848611  | 0.320305  | -0.375920 |
| H | 4.201361  | 0.531005  | -1.398108 |
| H | 2.753528  | 0.294955  | -0.434938 |
| H | 4.086327  | 3.599537  | 0.845070  |
| H | 3.737572  | 3.064910  | -0.793693 |
| C | 4.336981  | -1.066566 | 0.062706  |
| H | 5.434421  | -1.119353 | 0.004433  |
| H | 4.086061  | -1.215386 | 1.123721  |
| C | 3.742977  | -2.227037 | -0.766225 |
| H | 4.159958  | -3.173242 | -0.387868 |
| H | 4.080343  | -2.140851 | -1.808386 |

Sum of electronic and zero-point Energies= -1083.754758  
 Sum of electronic and thermal Energies= -1083.729769  
 Sum of electronic and thermal Enthalpies= -1083.728824  
 Sum of electronic and thermal Free Energies= -1083.810308

daec[n=5]-8-E2 (benzene)

|   |           |           |           |
|---|-----------|-----------|-----------|
| C | 1.584281  | -2.418988 | -0.855761 |
| H | 2.112961  | -2.455770 | -1.803981 |
| C | 2.327147  | -2.276397 | 0.326955  |
| C | 1.641932  | -2.231771 | 1.547957  |
| H | 2.193725  | -2.134806 | 2.480899  |
| C | 0.248326  | -2.309358 | 1.579294  |
| H | -0.292210 | -2.281228 | 2.522849  |
| C | -0.483971 | -2.435697 | 0.401887  |
| O | -1.859941 | -2.593137 | 0.457657  |
| C | 0.184634  | -2.503058 | -0.836057 |
| O | -0.601596 | -2.630777 | -1.939878 |
| C | 0.032687  | -2.740255 | -3.206881 |
| H | -0.775962 | -2.857907 | -3.934171 |
| H | 0.692122  | -3.618723 | -3.254269 |
| H | 0.610277  | -1.837174 | -3.452374 |
| C | -4.393372 | 0.689384  | 0.870516  |
| H | -5.084156 | 1.524783  | 0.975488  |
| C | -3.431539 | 0.712971  | -0.153282 |
| C | -3.375282 | 1.888809  | -1.111752 |
| H | -4.405004 | 2.204110  | -1.331136 |
| H | -2.942106 | 1.564585  | -2.068783 |
| C | -2.591759 | 3.120989  | -0.599293 |
| H | -2.860183 | 3.982452  | -1.229501 |
| C | -1.066693 | 2.952728  | -0.616783 |
| H | -0.747748 | 2.731547  | -1.648744 |
| H | -0.789135 | 2.075704  | -0.016456 |
| C | -0.313646 | 4.196062  | -0.113395 |
| H | -0.508763 | 4.328964  | 0.962504  |
| H | -0.728736 | 5.087920  | -0.608270 |
| H | -2.929714 | 3.368442  | 0.418377  |
| C | -2.559255 | -0.377507 | -0.280947 |
| H | -1.827279 | -0.404428 | -1.083845 |
| C | -2.655239 | -1.466423 | 0.593677  |
| C | -3.620520 | -1.487881 | 1.602105  |
| H | -3.682257 | -2.351732 | 2.259180  |
| C | -4.488414 | -0.401656 | 1.735331  |
| H | -5.245710 | -0.411511 | 2.517266  |
| C | 3.454047  | 2.985640  | 0.057917  |

|   |          |           |           |
|---|----------|-----------|-----------|
| C | 1.205761 | 4.166112  | -0.361857 |
| H | 1.387616 | 4.097544  | -1.446641 |
| H | 1.638432 | 5.127173  | -0.043225 |
| C | 4.179853 | 1.782626  | 0.690556  |
| H | 3.950143 | 1.753819  | 1.767726  |
| C | 1.943669 | 3.019454  | 0.342954  |
| H | 1.494014 | 2.065809  | 0.038552  |
| H | 1.782864 | 3.095836  | 1.430589  |
| H | 5.267729 | 1.932990  | 0.616885  |
| C | 3.808434 | 0.431914  | 0.058448  |
| H | 4.163581 | 0.406604  | -0.984514 |
| H | 2.716258 | 0.342098  | 0.007851  |
| H | 3.910001 | 3.917239  | 0.426549  |
| H | 3.620002 | 2.977894  | -1.031482 |
| C | 4.354989 | -0.783844 | 0.818008  |
| H | 5.454975 | -0.787918 | 0.787408  |
| H | 4.080522 | -0.696398 | 1.879801  |
| C | 3.839168 | -2.137253 | 0.277146  |
| H | 4.303114 | -2.945947 | 0.861432  |
| H | 4.181502 | -2.270263 | -0.758651 |

Sum of electronic and zero-point Energies= -1083.754323

Sum of electronic and thermal Energies= -1083.729252

Sum of electronic and thermal Enthalpies= -1083.728307

Sum of electronic and thermal Free Energies= -1083.810447

daec[n=6]-1-TS (benzene)

|   |           |           |           |
|---|-----------|-----------|-----------|
| C | -1.611477 | -3.348818 | 0.042372  |
| H | -2.195317 | -4.243087 | -0.159263 |
| C | -2.284320 | -2.119569 | 0.191501  |
| C | -1.511429 | -0.990760 | 0.453253  |
| H | -1.973142 | -0.022181 | 0.606189  |
| C | -0.116906 | -1.065591 | 0.532890  |
| H | 0.438495  | -0.153476 | 0.701656  |
| C | 0.545348  | -2.277072 | 0.382717  |
| O | 1.913591  | -2.459469 | 0.471066  |
| C | -0.219980 | -3.446402 | 0.142919  |
| O | 0.488075  | -4.601721 | 0.014841  |
| C | -0.228789 | -5.803289 | -0.221159 |
| H | -0.924827 | -6.030160 | 0.599859  |
| H | 0.525935  | -6.593347 | -0.279670 |
| H | -0.785726 | -5.766825 | -1.169227 |
| C | 4.620719  | 0.485667  | -0.722831 |
| H | 5.316783  | 1.246679  | -1.071937 |
| C | 3.718770  | 0.786036  | 0.308735  |
| C | 3.569057  | 2.192031  | 0.856954  |
| H | 4.537457  | 2.596233  | 1.184916  |
| H | 2.929519  | 2.158177  | 1.749164  |
| C | 2.946650  | 3.152198  | -0.195054 |
| H | 3.748754  | 3.529050  | -0.844430 |
| C | 2.166536  | 4.338231  | 0.407861  |
| H | 2.127434  | 5.153686  | -0.330073 |
| H | 2.723210  | 4.738337  | 1.268958  |
| C | 0.722476  | 4.007286  | 0.842030  |
| H | 0.336559  | 4.844233  | 1.443715  |
| C | -0.244486 | 3.752188  | -0.328196 |
| H | 0.107149  | 2.896879  | -0.924171 |
| H | -0.222058 | 4.620669  | -1.005845 |
| H | 0.724700  | 3.133350  | 1.512972  |
| H | 2.280995  | 2.578530  | -0.852712 |
| C | 2.849919  | -0.220434 | 0.753376  |
| H | 2.202573  | -0.025390 | 1.602517  |
| C | 2.797198  | -1.458589 | 0.104547  |
| C | 3.695777  | -1.750073 | -0.925022 |
| H | 3.653243  | -2.724937 | -1.403636 |
| C | 4.620490  | -0.779454 | -1.316842 |
| H | 5.328764  | -1.004696 | -2.112092 |
| C | -4.119925 | 3.016315  | -0.735992 |
| C | -1.698016 | 3.488800  | 0.101023  |
| H | -1.715239 | 2.650889  | 0.814357  |
| H | -2.080874 | 4.362428  | 0.652770  |

|   |           |           |           |
|---|-----------|-----------|-----------|
| C | -4.472824 | 1.805653  | 0.149823  |
| H | -5.516323 | 1.905792  | 0.485926  |
| C | -2.627808 | 3.189294  | -1.088665 |
| H | -2.260336 | 2.296488  | -1.616659 |
| H | -2.544208 | 4.014756  | -1.812377 |
| H | -3.865894 | 1.838561  | 1.067323  |
| C | -4.293995 | 0.430762  | -0.518363 |
| H | -3.304821 | 0.375491  | -0.988095 |
| H | -5.016362 | 0.324472  | -1.342207 |
| H | -4.695594 | 2.953606  | -1.672512 |
| H | -4.466688 | 3.931142  | -0.230883 |
| C | -4.469810 | -0.741585 | 0.473281  |
| H | -5.543512 | -0.924039 | 0.622303  |
| H | -4.081215 | -0.450498 | 1.460360  |
| C | -3.802169 | -2.066311 | 0.056347  |
| H | -4.232070 | -2.882148 | 0.656382  |
| H | -4.076729 | -2.298238 | -0.985855 |

Sum of electronic and zero-point Energies= -1123.023407

Sum of electronic and thermal Energies= -1122.998088

Sum of electronic and thermal Enthalpies= -1122.997144

Sum of electronic and thermal Free Energies= -1123.078469

daec[n=6]-1-E1 (benzene)

|   |           |           |           |
|---|-----------|-----------|-----------|
| C | -0.979735 | 2.521561  | 0.790056  |
| H | -1.590585 | 2.376753  | 1.676454  |
| C | -1.602303 | 2.917857  | -0.406466 |
| C | -0.808003 | 3.127173  | -1.539788 |
| H | -1.267625 | 3.447096  | -2.473183 |
| C | 0.575987  | 2.937211  | -1.481873 |
| H | 1.204425  | 3.109067  | -2.352796 |
| C | 1.184238  | 2.537885  | -0.297092 |
| O | 2.562641  | 2.448621  | -0.228672 |
| C | 0.405572  | 2.326307  | 0.860688  |
| O | 1.085043  | 1.947745  | 1.973977  |
| C | 0.346020  | 1.698395  | 3.161683  |
| H | -0.175047 | 2.601258  | 3.511261  |
| H | 1.082578  | 1.395481  | 3.911365  |
| H | -0.382934 | 0.886900  | 3.022028  |
| C | 4.591135  | -1.187652 | -0.389605 |
| H | 5.149453  | -2.121009 | -0.442027 |
| C | 3.212985  | -1.186576 | -0.643086 |
| C | 2.469021  | -2.470267 | -0.952653 |
| H | 3.112580  | -3.142465 | -1.538598 |
| H | 1.604422  | -2.236090 | -1.587473 |
| C | 1.993942  | -3.214989 | 0.314865  |
| H | 2.878324  | -3.537489 | 0.883106  |
| C | 1.105996  | -4.440479 | 0.024842  |
| H | 0.995955  | -5.023227 | 0.952367  |
| H | 1.631002  | -5.098560 | -0.684655 |
| C | -0.297084 | -4.123778 | -0.529621 |
| H | -0.761359 | -5.061289 | -0.871285 |
| C | -1.236884 | -3.443011 | 0.477557  |
| H | -0.738958 | -2.567774 | 0.920595  |
| H | -1.432541 | -4.133388 | 1.313690  |
| H | -0.209579 | -3.493465 | -1.427468 |
| H | 1.462871  | -2.508225 | 0.967532  |
| C | 2.510600  | 0.027022  | -0.581001 |
| H | 1.443549  | 0.043735  | -0.788359 |
| C | 3.176106  | 1.214735  | -0.267942 |
| C | 4.552672  | 1.210095  | -0.014626 |
| H | 5.050053  | 2.147352  | 0.221807  |
| C | 5.250960  | 0.005491  | -0.078070 |
| H | 6.322578  | -0.001123 | 0.113721  |
| C | -4.797583 | -1.730191 | 0.307770  |
| C | -2.567496 | -2.981635 | -0.134582 |
| H | -2.351166 | -2.276922 | -0.951395 |
| H | -3.081566 | -3.837194 | -0.601177 |
| C | -4.620347 | -0.552215 | -0.670146 |
| H | -5.618449 | -0.241440 | -1.015846 |
| C | -3.501970 | -2.323378 | 0.891758  |

|   |           |           |           |
|---|-----------|-----------|-----------|
| H | -2.949130 | -1.539028 | 1.430500  |
| H | -3.773338 | -3.070173 | 1.653659  |
| H | -4.085075 | -0.887381 | -1.571071 |
| C | -3.894379 | 0.665958  | -0.078273 |
| H | -2.861747 | 0.393550  | 0.178732  |
| H | -4.379693 | 0.954975  | 0.868580  |
| H | -5.434299 | -1.398420 | 1.142676  |
| H | -5.359816 | -2.528285 | -0.201440 |
| C | -3.877167 | 1.876354  | -1.021734 |
| H | -4.912845 | 2.185480  | -1.229002 |
| H | -3.444166 | 1.583869  | -1.990297 |
| C | -3.106594 | 3.102701  | -0.476364 |
| H | -3.327523 | 3.963592  | -1.122580 |
| H | -3.495956 | 3.355467  | 0.520346  |

Sum of electronic and zero-point Energies= -1123.042035

Sum of electronic and thermal Energies= -1123.015721

Sum of electronic and thermal Enthalpies= -1123.014777

Sum of electronic and thermal Free Energies= -1123.099771

daec[n=6]-1-E2 (benzene)

|   |           |           |           |
|---|-----------|-----------|-----------|
| C | -0.479286 | 2.992007  | -0.628111 |
| H | -0.806194 | 3.322915  | -1.610239 |
| C | -1.418041 | 2.941050  | 0.419100  |
| C | -0.988657 | 2.536877  | 1.686657  |
| H | -1.694990 | 2.502426  | 2.513638  |
| C | 0.346137  | 2.173531  | 1.901930  |
| H | 0.691852  | 1.859015  | 2.883978  |
| C | 1.265367  | 2.217139  | 0.861673  |
| O | 2.595736  | 1.938722  | 1.115323  |
| C | 0.859176  | 2.641404  | -0.423659 |
| O | 1.830755  | 2.676200  | -1.371921 |
| C | 1.473591  | 3.077908  | -2.687260 |
| H | 0.726400  | 2.402110  | -3.127827 |
| H | 2.395367  | 3.026733  | -3.273729 |
| H | 1.089871  | 4.108185  | -2.705084 |
| C | 4.416858  | -1.601595 | -0.116982 |
| H | 4.918754  | -2.515370 | -0.431158 |
| C | 3.029283  | -1.483276 | -0.268464 |
| C | 2.194271  | -2.619387 | -0.824736 |
| H | 2.795303  | -3.215061 | -1.526753 |
| H | 1.363916  | -2.197438 | -1.406353 |
| C | 1.634792  | -3.552138 | -0.272544 |
| H | 2.478825  | -4.048877 | 0.772586  |
| C | 0.658247  | -4.623591 | -0.249316 |
| H | 0.460786  | -5.341562 | 0.561562  |
| H | 1.154258  | -5.197909 | -1.047076 |
| C | -0.688332 | -4.093821 | -0.780759 |
| H | -1.226952 | -4.924883 | -1.261049 |
| C | -1.595348 | -3.467294 | 0.289881  |
| H | -1.037152 | -2.706697 | 0.855492  |
| H | -1.878803 | -4.239675 | 1.022687  |
| H | -0.509891 | -3.358139 | -1.579489 |
| H | 1.147890  | -2.943125 | 1.046626  |
| C | 2.399672  | -0.295618 | 0.135813  |
| H | 1.323068  | -0.192175 | 0.025874  |
| C | 3.146499  | 0.753575  | 0.675539  |
| C | 4.532744  | 0.631667  | 0.827473  |
| H | 5.093902  | 1.462482  | 1.247706  |
| C | 5.158083  | -0.548568 | 0.429756  |
| H | 6.236627  | -0.645331 | 0.541828  |
| C | -4.979870 | -1.419751 | 0.262013  |
| C | -2.858637 | -2.809384 | -0.284524 |
| H | -2.552175 | -2.030998 | -0.999302 |
| H | -3.432267 | -3.547147 | -0.868289 |
| C | -4.662487 | -0.149284 | -0.550776 |
| H | -5.613017 | 0.275907  | -0.908687 |
| C | -3.763904 | -2.199566 | 0.796765  |
| H | -3.161471 | -1.544791 | 1.443918  |
| H | -4.128157 | -3.007033 | 1.450282  |
| H | -4.096929 | -0.415111 | -1.456533 |

|   |           |           |           |
|---|-----------|-----------|-----------|
| C | -3.892897 | 0.931448  | 0.224172  |
| H | -2.918673 | 0.538775  | 0.545093  |
| H | -4.441248 | 1.177685  | 1.148122  |
| H | -5.616848 | -1.139775 | 1.115405  |
| H | -5.589635 | -2.091943 | -0.361562 |
| C | -3.673039 | 2.214783  | -0.588416 |
| H | -4.648827 | 2.638622  | -0.870191 |
| H | -3.162565 | 1.968062  | -1.532006 |
| C | -2.865669 | 3.307448  | 0.151225  |
| H | -2.899898 | 4.228363  | -0.448732 |
| H | -3.364371 | 3.539010  | 1.102837  |

Sum of electronic and zero-point Energies= -1123.042232

Sum of electronic and thermal Energies= -1123.015976

Sum of electronic and thermal Enthalpies= -1123.015032

Sum of electronic and thermal Free Energies= -1123.099681

daec[n=6]-2-TS (benzene)

|   |           |           |           |
|---|-----------|-----------|-----------|
| C | -2.173019 | 2.938706  | 0.026626  |
| H | -2.897516 | 3.709076  | -0.224195 |
| C | -2.637981 | 1.641205  | 0.320937  |
| C | -1.688840 | 0.673263  | 0.641768  |
| H | -1.988311 | -0.336201 | 0.900951  |
| C | -0.320284 | 0.967759  | 0.640507  |
| H | 0.383371  | 0.175483  | 0.860359  |
| C | 0.134854  | 2.245847  | 0.346167  |
| O | 1.459051  | 2.640865  | 0.339610  |
| C | -0.812147 | 3.256795  | 0.043798  |
| O | -0.298871 | 4.488000  | -0.226705 |
| C | -1.203648 | 5.533620  | -0.545253 |
| H | -1.780975 | 5.309882  | -1.454613 |
| H | -0.585188 | 6.418765  | -0.722029 |
| H | -1.897457 | 5.738533  | 0.283436  |
| C | 4.592156  | 0.049611  | -0.594293 |
| H | 5.410729  | -0.614412 | -0.865936 |
| C | 3.812215  | -0.231056 | 0.538666  |
| C | 4.038622  | -1.479676 | 1.374370  |
| H | 3.275022  | -1.518700 | 2.162039  |
| H | 5.005545  | -1.409679 | 1.895830  |
| C | 4.031059  | -2.806029 | 0.573862  |
| H | 4.940394  | -2.849664 | -0.042925 |
| C | 2.822224  | -3.047268 | -0.348872 |
| H | 3.019892  | -3.959634 | -0.932383 |
| H | 2.765078  | -2.230486 | -1.082709 |
| C | 1.453608  | -3.194182 | 0.335701  |
| H | 1.245642  | -2.308319 | 0.954805  |
| C | 0.316885  | -3.369766 | -0.685642 |
| H | 0.524259  | -4.253487 | -1.309950 |
| H | 0.327680  | -2.508261 | -1.371749 |
| H | 1.473177  | -4.051839 | 1.027048  |
| H | 4.119798  | -3.633139 | 1.294435  |
| C | 2.779610  | 0.656347  | 0.874521  |
| H | 2.208461  | 0.492250  | 1.783872  |
| C | 2.476987  | 1.747342  | 0.051606  |
| C | 3.254389  | 2.015684  | -1.077036 |
| H | 3.011213  | 2.876650  | -1.694166 |
| C | 4.322761  | 1.170165  | -1.383512 |
| H | 4.938007  | 1.378335  | -2.256949 |
| C | -3.632510 | -3.699507 | -0.618066 |
| C | -1.088922 | -3.498602 | -0.077717 |
| H | -1.142049 | -4.401816 | 0.551166  |
| H | -1.263679 | -2.648413 | 0.598138  |
| C | -4.135937 | -2.573945 | 0.305928  |
| H | -3.492630 | -2.523277 | 1.197490  |
| C | -2.192325 | -3.548940 | -1.148886 |
| H | -1.988460 | -4.393279 | -1.825445 |
| H | -2.120157 | -2.646851 | -1.774450 |
| H | -5.134217 | -2.847723 | 0.681005  |
| C | -4.204224 | -1.177549 | -0.335332 |
| H | -4.942189 | -1.179264 | -1.152328 |
| H | -3.242400 | -0.944300 | -0.807020 |

|   |           |           |           |
|---|-----------|-----------|-----------|
| H | -3.711894 | -4.653891 | -0.074659 |
| H | -4.311652 | -3.786878 | -1.480401 |
| C | -4.562746 | -0.070338 | 0.680083  |
| H | -4.115884 | -0.307263 | 1.657042  |
| H | -5.649251 | -0.072408 | 0.847047  |
| C | -4.134658 | 1.352066  | 0.274515  |
| H | -4.505851 | 1.566673  | -0.740756 |
| H | -4.648719 | 2.073298  | 0.928092  |

Sum of electronic and zero-point Energies= -1123.027566  
Sum of electronic and thermal Energies= -1123.002301  
Sum of electronic and thermal Enthalpies= -1123.001357  
Sum of electronic and thermal Free Energies= -1123.082230

daec[n=6]-2-E1 (benzene)

|   |           |           |           |
|---|-----------|-----------|-----------|
| C | 1.338965  | 2.195574  | 0.738125  |
| H | 1.972433  | 1.968172  | 1.590484  |
| C | 1.940609  | 2.593920  | -0.469148 |
| C | 1.117274  | 2.909415  | -1.556073 |
| H | 1.560511  | 3.230514  | -2.496959 |
| C | -0.274801 | 2.838230  | -1.438500 |
| H | -0.923327 | 3.110707  | -2.268090 |
| C | -0.862612 | 2.446396  | -0.240851 |
| O | -2.234228 | 2.520728  | -0.085906 |
| C | -0.053024 | 2.111643  | 0.866189  |
| O | -0.712692 | 1.747880  | 1.996206  |
| C | 0.052847  | 1.425180  | 3.148890  |
| H | 0.712611  | 0.563822  | 2.969708  |
| H | -0.673457 | 1.166014  | 3.924547  |
| H | 0.654204  | 2.281121  | 3.487823  |
| C | -4.794014 | -0.755484 | -0.288471 |
| H | -5.496693 | -1.584586 | -0.355652 |
| C | -3.502013 | -0.895933 | -0.817537 |
| C | -3.090621 | -2.195920 | -1.485253 |
| H | -2.187821 | -2.030162 | -2.086952 |
| H | -3.877949 | -2.491236 | -2.194006 |
| C | -2.863893 | -3.377628 | -0.512132 |
| H | -3.777601 | -3.521291 | 0.082541  |
| C | -1.665432 | -3.229975 | 0.440472  |
| H | -1.700352 | -4.049199 | 1.174900  |
| H | -1.770870 | -2.299375 | 1.017898  |
| C | -0.297231 | -3.242205 | -0.256696 |
| H | -0.253265 | -2.431669 | -0.999106 |
| C | 0.885428  | -3.077410 | 0.707976  |
| H | 0.926010  | -3.932569 | 1.400971  |
| H | 0.710248  | -2.187930 | 1.334155  |
| H | -0.183159 | -4.179044 | -0.825439 |
| H | -2.740027 | -4.294106 | -1.109360 |
| C | -2.614216 | 0.188478  | -0.735313 |
| H | -1.613719 | 0.105288  | -1.152931 |
| C | -3.019303 | 1.388703  | -0.141124 |
| C | -4.308335 | 1.522568  | 0.383914  |
| H | -4.597885 | 2.467002  | 0.837465  |
| C | -5.189083 | 0.444540  | 0.307041  |
| H | -6.195159 | 0.545764  | 0.710446  |
| C | 4.730933  | -2.266071 | 0.241983  |
| C | 2.233000  | -2.916608 | -0.010316 |
| H | 2.459010  | -3.824868 | -0.591433 |
| C | 2.132927  | -2.105734 | -0.746332 |
| C | 4.684610  | -1.077784 | -0.740041 |
| H | 4.097145  | -1.353341 | -1.628411 |
| C | 3.399554  | -2.606785 | 0.938984  |
| H | 3.562704  | -3.465634 | 1.607828  |
| H | 3.110608  | -1.772114 | 1.595291  |
| H | 5.705694  | -0.890361 | -1.106448 |
| C | 4.110305  | 0.218208  | -0.149137 |
| H | 4.674428  | 0.492455  | 0.757502  |
| H | 3.076345  | 0.043341  | 0.176091  |
| H | 5.094824  | -3.152250 | -0.300468 |
| H | 5.482786  | -2.057929 | 1.018917  |
| C | 4.129205  | 1.397104  | -1.131057 |

|   |          |          |           |
|---|----------|----------|-----------|
| H | 3.639921 | 1.101513 | -2.071516 |
| H | 5.171299 | 1.638935 | -1.389031 |
| C | 3.450891 | 2.680928 | -0.594915 |
| H | 3.889078 | 2.934352 | 0.381378  |
| H | 3.699592 | 3.511055 | -1.270258 |

Sum of electronic and zero-point Energies= -1123.040979  
Sum of electronic and thermal Energies= -1123.014779  
Sum of electronic and thermal Enthalpies= -1123.013835  
Sum of electronic and thermal Free Energies= -1123.097765

daec[n=6]-2-E2 (benzene)

|   |           |           |           |
|---|-----------|-----------|-----------|
| C | 0.866156  | 2.794519  | -0.592219 |
| H | 1.158531  | 3.189700  | -1.561452 |
| C | 1.861624  | 2.559760  | 0.373932  |
| C | 1.476497  | 2.073003  | 1.627474  |
| H | 2.226517  | 1.898706  | 2.396130  |
| C | 0.129925  | 1.815720  | 1.906478  |
| H | -0.181827 | 1.448402  | 2.881482  |
| C | -0.848842 | 2.050480  | 0.948049  |
| O | -2.176667 | 1.916861  | 1.305654  |
| C | -0.486055 | 2.556678  | -0.320144 |
| O | -1.509574 | 2.786585  | -1.183222 |
| C | -1.202198 | 3.291168  | -2.475539 |
| H | -0.718441 | 4.276934  | -2.419901 |
| H | -2.161588 | 3.389647  | -2.991320 |
| H | -0.558305 | 2.599682  | -3.037970 |
| C | -4.730271 | -1.048072 | -0.115205 |
| H | -5.424169 | -1.806599 | -0.474233 |
| C | -3.384334 | -1.099246 | -0.506608 |
| C | -2.897221 | -2.217677 | -1.409254 |
| H | -2.013309 | -1.882937 | -1.967528 |
| H | -3.671848 | -2.425719 | -2.160749 |
| C | -2.581087 | -3.544656 | -0.675268 |
| H | -3.472379 | -3.848549 | -0.107391 |
| C | -1.370314 | -3.507245 | 0.273060  |
| H | -1.344266 | -4.447990 | 0.843862  |
| H | -1.511848 | -2.707197 | 1.014714  |
| C | -0.020469 | -3.313033 | -0.433302 |
| H | -0.048416 | -2.393631 | -1.036970 |
| C | 1.174034  | -3.220887 | 0.527021  |
| H | 1.290459  | -4.169849 | 1.073821  |
| H | 0.959359  | -2.455138 | 1.289216  |
| H | 0.140991  | -4.136173 | -1.147825 |
| H | -2.419725 | -4.324840 | -1.435108 |
| C | -2.504412 | -0.106977 | -0.044966 |
| H | -1.458664 | -0.129184 | -0.340135 |
| C | -2.969333 | 0.916307  | 0.787036  |
| C | -4.313250 | 0.962024  | 1.173662  |
| H | -4.649111 | 1.769877  | 1.818863  |
| C | -5.186335 | -0.024727 | 0.719515  |
| H | -6.233704 | 0.010809  | 1.014222  |
| C | 4.945127  | -2.088812 | 0.108587  |
| C | 2.486092  | -2.855924 | -0.182749 |
| H | 2.752447  | -3.643085 | -0.906261 |
| H | 2.309279  | -1.948084 | -0.777684 |
| C | 4.790873  | -0.776583 | -0.686916 |
| H | 4.171676  | -0.956603 | -1.578304 |
| C | 3.660732  | -2.617481 | 0.777220  |
| H | 3.898821  | -3.555490 | 1.301660  |
| H | 3.342009  | -1.913691 | 1.560315  |
| H | 5.780643  | -0.482230 | -1.068720 |
| C | 4.185938  | 0.388171  | 0.110630  |
| H | 4.814800  | 0.598429  | 0.991118  |
| H | 3.204246  | 0.092698  | 0.502996  |
| H | 5.345743  | -2.859616 | -0.567828 |
| H | 5.707896  | -1.946616 | 0.889706  |
| C | 4.020956  | 1.671201  | -0.714738 |
| H | 3.452609  | 1.445845  | -1.630242 |
| H | 5.008813  | 2.025524  | -1.045973 |
| C | 3.318406  | 2.824480  | 0.041107  |



H 3.871002 3.031810 0.968461  
H 3.388260 3.734449 -0.571605  
Sum of electronic and zero-point Energies= -1123.041254  
Sum of electronic and thermal Energies= -1123.015069  
Sum of electronic and thermal Enthalpies= -1123.014125  
Sum of electronic and thermal Free Energies= -1123.097922

daec[n=6]-3-TS (benzene)

C -3.045481 -2.090505 0.136456  
H -3.977771 -2.611969 -0.064122  
C -3.068355 -0.687432 0.261656  
C -1.861352 -0.039277 0.514512  
H -1.825404 1.037869 0.633968  
C -0.663266 -0.755076 0.625483  
H 0.256315 -0.211652 0.801778  
C -0.643342 -2.138045 0.500936  
O 0.484345 -2.928573 0.633191  
C -1.860311 -2.822263 0.257414  
O -1.768795 -4.175592 0.146551  
C -2.959003 -4.908419 -0.098487  
H -2.657449 -5.959259 -0.143109  
H -3.422091 -4.625792 -1.055511  
H -3.691771 -4.777998 0.711471  
C 4.196572 -1.775476 -0.886733  
H 5.158684 -1.485937 -1.306334  
C 3.650358 -1.038782 0.175317  
C 4.303149 0.234147 0.679294  
H 5.347258 0.050085 0.970640  
H 3.783236 0.558575 1.590003  
C 4.263111 1.369864 -0.380968  
H 3.391814 1.223013 -1.031389  
C 4.223637 2.794081 0.206645  
H 4.485322 3.508407 -0.588861  
H 5.008184 2.893879 0.972492  
C 2.869082 3.214402 0.814434  
H 2.995867 4.192889 1.302372  
C 1.715347 3.305078 -0.198848  
H 1.568430 2.327030 -0.679645  
H 1.993682 3.999249 -1.007776  
H 2.587266 2.516475 1.618437  
H 5.139088 1.273544 -1.037281  
C 2.420191 -1.447110 0.710368  
H 2.015795 -0.930009 1.575813  
C 1.709488 -2.508395 0.140186  
C 2.256737 -3.233728 -0.920598  
H 1.694708 -4.065404 -1.337376  
C 3.510952 -2.871310 -1.417095  
H 3.947536 -3.438280 -2.237321  
C -2.156314 4.038394 0.055753  
C 0.377915 3.747082 0.417126  
H 0.464308 4.777981 0.795300  
H 0.163769 3.121033 1.298498  
C -3.379820 3.758599 -0.842724  
H -3.204911 4.217128 -1.828088  
C -0.803318 3.646024 -0.562323  
H -0.851054 2.614541 -0.940661  
H -0.609882 4.279540 -1.442442  
H -4.255406 4.276312 -0.421043  
C -3.732803 2.269764 -1.041421  
H -2.844078 1.721047 -1.378710  
H -4.459493 2.184856 -1.863398  
H -2.136336 5.111341 0.300049  
H -2.278924 3.521321 1.019691  
C -4.332545 1.590284 0.205860  
H -5.354676 1.969100 0.351631  
H -3.781057 1.884844 1.109346  
C -4.395218 0.053141 0.137852  
H -4.883203 -0.247306 -0.803080  
H -5.064634 -0.303384 0.936161  
Sum of electronic and zero-point Energies= -1123.026279

Sum of electronic and thermal Energies= -1123.000885  
Sum of electronic and thermal Enthalpies= -1122.999941  
Sum of electronic and thermal Free Energies= -1123.081567

daec[n=6]-3-E1 (benzene)

C 1.744746 -2.337152 0.550673  
H 2.395707 -2.303507 1.419209  
C 2.316410 -2.259634 -0.731470  
C 1.473036 -2.331966 -1.846864  
H 1.895184 -2.285992 -2.849095  
C 0.092946 -2.488000 -1.687125  
H -0.564709 -2.573275 -2.549365  
C -0.465633 -2.560681 -0.415406  
O -1.811440 -2.834293 -0.249357  
C 0.360840 -2.476007 0.724957  
O -0.269356 -2.554229 1.925200  
C 0.518766 -2.475192 3.104761  
H -0.186411 -2.547460 3.937835  
H 1.057619 -1.518662 3.168950  
H 1.238318 -3.304278 3.167895  
C -4.781846 0.086140 -0.351750  
H -5.581164 0.824573 -0.388873  
C -3.453248 0.489554 -0.538328  
C -3.096730 1.947613 -0.750281  
H -3.866993 2.436378 -1.364670  
H -2.161894 2.002909 -1.322646  
C -2.939237 2.728357 0.573373  
H -2.279874 2.161314 1.244285  
C -2.407113 4.164944 0.406825  
H -2.386306 4.638903 1.400283  
H -3.123059 4.748750 -0.192171  
C -1.010924 4.289182 -0.236299  
H -0.742110 5.355456 -0.284564  
C 0.095091 3.516381 0.496223  
H -0.202338 2.462794 0.597243  
H 0.193325 3.899195 1.524748  
H -1.053101 3.947937 -1.281587  
H -3.914449 2.766460 1.079993  
C -2.435208 -0.477177 -0.498462  
H -1.401292 -0.178935 -0.651778  
C -2.744635 -1.821647 -0.277097  
C -4.073681 -2.219987 -0.087125  
H -4.290524 -3.271824 0.081185  
C -5.083606 -1.260718 -0.125831  
H -6.118120 -1.568754 0.015910  
C 3.817547 2.507621 -0.291761  
C 1.461718 3.554830 -0.203433  
H 1.851352 4.584751 -0.221018  
H 1.332771 3.260219 -1.257234  
C 4.821789 1.532715 0.353610  
H 5.026421 1.870323 1.381433  
C 2.481045 2.614535 0.456019  
H 2.023770 1.617276 0.532810  
H 2.667755 2.941516 1.491741  
H 5.780732 1.601858 -0.183136  
C 4.383760 0.055656 0.402734  
H 3.413574 -0.025911 0.911074  
H 5.098601 -0.498699 1.030730  
H 4.283219 3.503655 -0.345012  
H 3.625927 2.212099 -1.334347  
C 4.310788 -0.633953 -0.967687  
H 5.314510 -0.624887 -1.419174  
H 3.662108 -0.067607 -1.650548  
C 3.814830 -2.100853 -0.915516  
H 4.347691 -2.630036 -0.112000  
H 4.101423 -2.595741 -1.853303  
Sum of electronic and zero-point Energies= -1123.039846  
Sum of electronic and thermal Energies= -1123.013618  
Sum of electronic and thermal Enthalpies= -1123.012674  
Sum of electronic and thermal Free Energies= -1123.097530

## daec[n=6]-3-E2 (benzene)

|   |           |           |           |
|---|-----------|-----------|-----------|
| C | -1.315793 | 2.550628  | -0.811659 |
| H | -1.688526 | 2.659798  | -1.826561 |
| C | -2.241415 | 2.425200  | 0.240816  |
| C | -1.756402 | 2.309596  | 1.547701  |
| H | -2.451563 | 2.231234  | 2.380926  |
| C | -0.378705 | 2.303950  | 1.795895  |
| H | 0.009033  | 2.221152  | 2.808607  |
| C | 0.529893  | 2.428193  | 0.751604  |
| O | 1.876218  | 2.540875  | 1.043027  |
| C | 0.062873  | 2.566192  | -0.575052 |
| O | 1.017858  | 2.716885  | -1.529116 |
| C | 0.605967  | 2.846084  | -2.882901 |
| H | 1.527059  | 2.940242  | -3.465063 |
| H | -0.010966 | 3.743607  | -1.635848 |
| H | 0.051583  | 1.959931  | -3.223961 |
| C | 4.704574  | -0.338906 | 0.006982  |
| H | 5.465369  | -1.071618 | -0.257461 |
| C | 3.349306  | -0.654244 | -0.157139 |
| C | 2.910147  | -2.015561 | -0.659234 |
| H | 3.657169  | -2.415278 | -1.360187 |
| H | 1.980316  | -1.897283 | -1.230595 |
| C | 2.688731  | -3.036447 | 0.478830  |
| H | 2.055310  | -2.577430 | 1.249931  |
| C | 2.073788  | -4.374793 | 0.025403  |
| H | 2.005549  | -5.034369 | 0.904175  |
| H | 2.764419  | -4.871942 | -0.673220 |
| C | 0.685421  | -4.280757 | -0.639569 |
| H | 0.353523  | -5.297290 | -0.900426 |
| C | -0.387016 | -3.599116 | 0.222258  |
| H | -0.026876 | -2.609359 | 0.537409  |
| H | -0.533669 | -4.172953 | 1.151253  |
| H | 0.769610  | -3.743743 | -1.596388 |
| H | 3.653261  | -3.235084 | 0.968203  |
| C | 2.381918  | 0.304985  | 0.181670  |
| H | 1.326363  | 0.074495  | 0.060449  |
| C | 2.765641  | 1.556349  | 0.667804  |
| C | 4.120284  | 1.867051  | 0.833539  |
| H | 4.395451  | 2.848335  | 1.211845  |
| C | 5.081501  | 0.913784  | 0.501839  |
| H | 6.136244  | 1.153963  | 0.624324  |
| C | -4.019681 | -2.212761 | -0.395182 |
| C | -1.735971 | -3.406209 | -0.486276 |
| H | -2.188087 | -4.383936 | -0.715521 |
| H | -1.562629 | -2.916385 | -1.458002 |
| C | -4.983622 | -1.326000 | 0.417227  |
| H | -5.236774 | -1.849527 | 1.352092  |
| C | -2.712553 | -2.551866 | 0.335279  |
| H | -2.198374 | -1.621604 | 0.617633  |
| H | -2.946185 | -3.066026 | 1.281462  |
| H | -5.929133 | -1.226993 | -0.138486 |
| C | -4.464373 | 0.081283  | 0.771873  |
| H | -3.510636 | 0.001196  | 1.310696  |
| H | -5.169647 | 0.543189  | 1.480165  |
| H | -4.541145 | -3.146684 | -0.655465 |
| H | -3.782527 | -1.727256 | -1.354028 |
| C | -4.301040 | 1.023623  | -0.429784 |
| H | -5.284123 | 1.167005  | -0.903634 |
| H | -3.656458 | 0.565123  | -1.193148 |
| C | -3.727444 | 2.415746  | -0.066881 |
| H | -4.283515 | 2.818644  | 0.791700  |
| H | -3.918216 | 3.098748  | -0.906426 |

Sum of electronic and zero-point Energies= -1123.040688

Sum of electronic and thermal Energies= -1123.014478

Sum of electronic and thermal Enthalpies= -1123.013534

Sum of electronic and thermal Free Energies= -1123.097627

## daec[n=7]-1-TS (benzene)

|   |           |          |           |
|---|-----------|----------|-----------|
| C | -3.328693 | 2.102969 | -0.008793 |
|---|-----------|----------|-----------|

|   |           |           |           |
|---|-----------|-----------|-----------|
| H | -4.140638 | 2.814087  | 0.117532  |
| C | -2.001980 | 2.571683  | 0.056868  |
| C | -0.981293 | 1.637942  | -0.118891 |
| H | 0.058992  | 1.938551  | -0.109734 |
| C | -1.261892 | 0.284679  | -0.324587 |
| H | -0.436135 | -0.406250 | -0.429433 |
| C | -2.570797 | -0.176301 | -0.382822 |
| O | -2.936581 | -1.491386 | -0.610591 |
| C | -3.627966 | 0.753349  | -0.230123 |
| O | -4.886589 | 0.240284  | -0.306896 |
| C | -5.981967 | 1.129372  | -0.154919 |
| H | -5.988901 | 1.904526  | -0.935337 |
| H | -5.982354 | 1.610580  | 0.834406  |
| H | -6.880927 | 0.513525  | -0.253989 |
| C | -0.594477 | -4.634480 | 0.820865  |
| H | 0.010312  | -5.444301 | 1.226320  |
| C | -0.058609 | -3.798672 | -0.169746 |
| C | 1.397451  | -3.897404 | -0.579956 |
| H | 1.529755  | -3.472474 | -1.584126 |
| H | 1.713550  | -4.949048 | -0.634827 |
| C | 2.297768  | -3.151850 | 0.435796  |
| H | 1.911346  | -2.131564 | 0.570059  |
| C | 3.794577  | -3.102026 | 0.082318  |
| H | 4.139013  | -4.118289 | -0.164525 |
| H | 4.350356  | -2.812607 | 0.985755  |
| C | 4.194032  | -2.158776 | -1.069800 |
| H | 3.700310  | -2.479881 | -1.999406 |
| C | 3.912085  | -0.655845 | -0.860366 |
| H | 2.827214  | -0.477297 | -0.849805 |
| H | 4.291006  | -0.120667 | -1.745273 |
| H | 5.273057  | -2.286601 | -1.247638 |
| H | 2.180909  | -3.641445 | 1.413328  |
| C | -0.863620 | -2.775623 | -0.691634 |
| H | -0.488566 | -2.160782 | -1.505061 |
| C | -2.132892 | -2.526630 | -0.159110 |
| C | -2.660228 | -3.362718 | 0.828272  |
| H | -3.657160 | -3.163234 | 1.212520  |
| C | -1.891631 | -4.429362 | 1.298645  |
| H | -2.299982 | -5.090546 | 2.060767  |
| C | 3.275399  | 2.220533  | 0.259703  |
| C | 4.547636  | -0.046511 | 0.403333  |
| H | 3.998833  | -0.386874 | 1.294342  |
| H | 5.571677  | -0.436853 | 0.513243  |
| C | 2.172532  | 4.526397  | -0.140892 |
| H | 2.412777  | 5.599168  | -0.185200 |
| H | 2.019637  | 4.213444  | -1.185680 |
| C | 4.621508  | 1.493525  | 0.414225  |
| H | 5.294776  | 1.825143  | -0.392464 |
| C | 0.854681  | 4.328536  | 0.637513  |
| H | 0.841371  | 4.985655  | 1.520351  |
| H | 5.097776  | 1.812557  | 1.354377  |
| H | 0.816466  | 3.310357  | 1.039006  |
| C | -0.397572 | 4.601721  | -0.224570 |
| H | -0.242301 | 4.188434  | -1.231768 |
| H | -0.498587 | 5.688216  | -0.361087 |
| H | 2.561440  | 1.822288  | 0.996527  |
| C | 3.388305  | 3.751976  | 0.404320  |
| H | 4.280849  | 4.090425  | -0.144202 |
| H | 3.566188  | 4.012290  | 1.459518  |
| C | -1.730064 | 4.047827  | 0.327281  |
| H | -2.558925 | 4.630033  | -0.099275 |
| H | 2.853746  | 1.990059  | -0.730440 |
| H | -1.775278 | 4.232319  | 1.413529  |

Sum of electronic and zero-point Energies= -1162.307117

Sum of electronic and thermal Energies= -1162.280513

Sum of electronic and thermal Enthalpies= -1162.279569

Sum of electronic and thermal Free Energies= -1162.363865

## daec[n=7]-1-E1 (benzene)

|   |           |          |           |
|---|-----------|----------|-----------|
| C | -2.095514 | 2.927571 | -0.261261 |
|---|-----------|----------|-----------|

|   |           |           |           |
|---|-----------|-----------|-----------|
| H | -2.158199 | 3.760042  | -0.956716 |
| C | -1.308356 | 3.067976  | 0.895793  |
| C | -1.240327 | 1.996375  | 1.791281  |
| H | -0.646783 | 2.084761  | 2.699133  |
| C | -1.942010 | 0.811764  | 1.541420  |
| H | -1.901042 | -0.015615 | 2.245967  |
| C | -2.711312 | 0.677869  | 0.389809  |
| O | -3.497295 | -0.430398 | 0.149229  |
| C | -2.794706 | 1.746226  | -0.530707 |
| O | -3.574318 | 1.533306  | -1.623719 |
| C | -3.696305 | 2.582525  | -2.572624 |
| H | -2.724816 | 2.843854  | -3.017424 |
| H | -4.146766 | 3.482128  | -2.128240 |
| H | -4.357669 | 2.199618  | -3.355433 |
| C | -2.075403 | -4.339228 | 0.276242  |
| H | -1.732902 | -5.372471 | 0.298715  |
| C | -1.196427 | -3.329001 | -0.140993 |
| C | 0.228721  | -3.664481 | -0.536314 |
| H | 0.505579  | -3.095379 | -1.434356 |
| H | 0.282344  | -4.727190 | -0.813042 |
| C | 1.252057  | -3.388079 | 0.587450  |
| H | 1.299787  | -2.305233 | 0.772843  |
| C | 2.659474  | -3.950603 | 0.315791  |
| H | 2.588124  | -5.046932 | 0.241894  |
| H | 3.285937  | -3.752972 | 1.197684  |
| C | 3.375511  | -3.433785 | -0.947146 |
| H | 2.805788  | -3.736587 | -1.838053 |
| C | 3.620450  | -1.915312 | -1.014631 |
| H | 2.656412  | -1.387245 | -1.020526 |
| H | 4.091904  | -1.686556 | -1.983512 |
| H | 4.344211  | -3.951676 | -1.024097 |
| H | 0.877384  | -3.834987 | 1.519716  |
| C | -1.653715 | -2.002309 | -0.169064 |
| H | -0.993788 | -1.204426 | -0.502166 |
| C | -2.963909 | -1.700049 | 0.216812  |
| C | -3.837611 | -2.712500 | 0.627467  |
| H | -4.853152 | -2.450147 | 0.912748  |
| C | -3.385421 | -4.030975 | 0.652476  |
| H | -4.061066 | -4.823832 | 0.968307  |
| C | 3.729462  | 1.093931  | -0.131575 |
| C | 4.507740  | -1.360029 | 0.111210  |
| H | 3.995233  | -1.473723 | 1.078457  |
| H | 5.421968  | -1.970511 | 0.179545  |
| C | 3.019503  | 3.565985  | -0.390153 |
| H | 3.428400  | 4.588247  | -0.372306 |
| H | 2.661863  | 3.401038  | -1.419262 |
| C | 4.911791  | 0.115072  | -0.064295 |
| H | 5.521806  | 0.221872  | -0.975548 |
| C | 1.823924  | 3.481007  | 0.569888  |
| H | 2.173336  | 3.620854  | 1.605996  |
| H | 5.567058  | 0.400332  | 0.773462  |
| H | 1.390857  | 2.473083  | 0.527985  |
| C | 0.725328  | 4.507029  | 0.262703  |
| H | 0.439320  | 4.428549  | -0.797427 |
| H | 1.123380  | 5.524089  | 0.398050  |
| H | 3.043929  | 0.883180  | 0.702863  |
| C | 4.154790  | 2.570375  | -0.091228 |
| H | 4.961881  | 2.731730  | -0.822695 |
| H | 4.591706  | 2.794675  | 0.894912  |
| C | -0.541511 | 4.354739  | 1.136588  |
| H | -1.202008 | 5.212515  | 0.943411  |
| H | 3.152455  | 0.913733  | -1.051103 |
| H | -0.256906 | 4.415354  | 2.196507  |

Sum of electronic and zero-point Energies= -1162.324373  
Sum of electronic and thermal Energies= -1162.296830  
Sum of electronic and thermal Enthalpies= -1162.295886  
Sum of electronic and thermal Free Energies= -1162.383647

daec[n=7]-1-E2 (benzene)

|   |          |          |          |
|---|----------|----------|----------|
| C | 0.593891 | 2.841662 | 0.934991 |
|---|----------|----------|----------|

|   |           |           |           |
|---|-----------|-----------|-----------|
| H | 1.079645  | 2.754403  | 1.902709  |
| C | 1.334973  | 3.333240  | -0.153082 |
| C | 0.700500  | 3.459025  | -1.394493 |
| H | 1.249973  | 3.847913  | -2.249860 |
| C | -0.641669 | 3.098551  | -1.544793 |
| H | -1.149771 | 3.206607  | -2.500327 |
| C | -1.371193 | 2.616607  | -0.462768 |
| O | -2.727689 | 2.402921  | -0.610526 |
| C | -0.754529 | 2.487849  | 0.800666  |
| O | -1.546000 | 2.033274  | 1.806809  |
| C | -0.972079 | 1.868917  | 3.096081  |
| H | -0.612344 | 2.824702  | 3.503583  |
| H | -0.145870 | 1.143570  | 3.081826  |
| H | -1.775773 | 1.486553  | 3.731831  |
| C | -4.554981 | -1.327421 | -0.363133 |
| H | -5.062143 | -2.289268 | -0.308559 |
| C | -3.170011 | -1.287330 | -0.574366 |
| C | -2.377972 | -2.575233 | -0.696539 |
| H | -1.676559 | -2.501293 | -1.539284 |
| H | -3.068738 | -3.395286 | -0.939541 |
| C | -1.603241 | -2.938093 | 0.590118  |
| H | -0.793208 | -2.209689 | 0.740402  |
| C | -1.047840 | -4.374222 | 0.614311  |
| H | -1.896607 | -5.075428 | 0.594437  |
| H | -0.552372 | -4.535977 | 1.582748  |
| C | -0.085647 | -4.761784 | -0.524986 |
| H | -0.624384 | -4.725821 | -1.483356 |
| C | 1.193229  | -3.914673 | -0.651152 |
| H | 0.922513  | -2.874612 | -0.881559 |
| H | 1.759533  | -4.275887 | -1.524167 |
| H | 0.200260  | -5.815819 | -0.384125 |
| H | -2.277164 | -2.817431 | 1.450454  |
| C | -2.529399 | -0.039086 | -0.647771 |
| H | -1.457481 | 0.015138  | -0.825049 |
| C | -3.267581 | 1.138442  | -0.503591 |
| C | -4.651181 | 1.092899  | -0.297672 |
| H | -5.199782 | 2.025787  | -0.196010 |
| C | -5.287372 | -0.143992 | -0.229437 |
| H | -6.363591 | -0.185609 | -0.070964 |
| C | 3.390521  | -1.783666 | -0.012069 |
| C | 2.109770  | -3.948463 | 0.582462  |
| H | 1.601412  | -3.474135 | 1.435630  |
| H | 2.278489  | -4.996728 | 0.875302  |
| C | 4.726697  | 0.331689  | -0.652406 |
| H | 5.749550  | 0.739206  | -0.659602 |
| H | 4.429160  | 0.242238  | -1.709519 |
| C | 3.475096  | -3.267352 | 0.377082  |
| H | 4.042182  | -3.810796 | -0.395527 |
| C | 3.789826  | 1.329904  | 0.043566  |
| H | 4.078712  | 1.427524  | 1.103042  |
| H | 4.059379  | -3.364015 | 1.305466  |
| H | 2.764886  | 0.936099  | 0.041402  |
| C | 3.790505  | 2.715807  | -0.614149 |
| H | 3.562084  | 2.609776  | -1.685484 |
| H | 4.800501  | 3.149379  | -0.557742 |
| H | 2.709875  | -1.270202 | 0.683662  |
| C | 4.753160  | -1.072892 | -0.023546 |
| H | 5.474798  | -1.690150 | -0.580826 |
| H | 5.140524  | -1.010690 | 1.005925  |
| C | 2.794193  | 3.716168  | 0.014768  |
| H | 2.960333  | 4.702621  | -0.441655 |
| H | 2.932913  | -1.689756 | -1.008267 |
| H | 3.022584  | 3.828193  | 1.084186  |

Sum of electronic and zero-point Energies= -1162.325017  
Sum of electronic and thermal Energies= -1162.297486  
Sum of electronic and thermal Enthalpies= -1162.296542  
Sum of electronic and thermal Free Energies= -1162.384015

daec[n=7]-2-TS (benzene)

|   |          |          |          |
|---|----------|----------|----------|
| C | 1.774241 | 3.278380 | 0.375101 |
|---|----------|----------|----------|

|   |           |           |           |
|---|-----------|-----------|-----------|
| H | 2.433606  | 4.142009  | 0.349602  |
| C | 2.343698  | 1.991812  | 0.453651  |
| C | 1.477135  | 0.902217  | 0.482490  |
| H | 1.865859  | -0.106240 | 0.565709  |
| C | 0.089092  | 1.071131  | 0.401606  |
| H | -0.551930 | 0.197163  | 0.385675  |
| C | -0.466669 | 2.341020  | 0.323083  |
| O | -1.816318 | 2.617101  | 0.244994  |
| C | 0.391312  | 3.469463  | 0.322238  |
| O | -0.224929 | 4.681063  | 0.248222  |
| C | 0.587875  | 5.843929  | 0.239893  |
| H | -0.103682 | 6.690032  | 0.184202  |
| H | 1.257008  | 5.867618  | -0.633058 |
| H | 1.187385  | 5.928063  | 1.158386  |
| C | -4.653857 | -0.171699 | -0.995804 |
| H | -5.408698 | -0.878247 | -1.335846 |
| C | -3.966486 | -0.410757 | 0.205597  |
| C | -4.237212 | -1.657648 | 1.031171  |
| H | -5.265720 | -1.618625 | 1.421550  |
| H | -3.581473 | -1.652801 | 1.911543  |
| C | -4.076364 | -2.991423 | 0.262913  |
| H | -4.333132 | -3.811056 | 0.951133  |
| C | -2.691120 | -3.256297 | -0.354535 |
| H | -2.424895 | -2.421207 | -1.019254 |
| H | -2.768715 | -4.142772 | -1.002460 |
| C | -1.555420 | -3.484064 | 0.654305  |
| H | -1.806492 | -4.340407 | 1.300727  |
| C | -0.191570 | -3.726741 | -0.013620 |
| H | 0.031018  | -2.880138 | -0.680201 |
| H | -0.250928 | -4.615724 | -0.661861 |
| H | -1.470096 | -2.615736 | 1.325270  |
| H | -4.827182 | -3.028479 | -0.539258 |
| C | -3.016139 | 0.529966  | 0.628768  |
| H | -2.499654 | 0.390596  | 1.575476  |
| C | -2.723216 | 1.650682  | -0.157207 |
| C | -3.406196 | 1.876800  | -1.353151 |
| H | -3.169676 | 2.760567  | -1.939913 |
| C | -4.381663 | 0.964011  | -1.760455 |
| H | -4.926212 | 1.137400  | -2.686798 |
| C | 2.817531  | -2.852870 | -0.458663 |
| C | 0.950754  | -3.902983 | 0.998101  |
| H | 0.957674  | -3.035023 | 1.677470  |
| H | 0.737558  | -4.777919 | 1.631616  |
| C | 4.848195  | -1.514618 | -1.380977 |
| H | 5.943072  | -1.455666 | -1.278198 |
| H | 4.659028  | -1.782880 | -2.431885 |
| C | 2.359535  | -4.054701 | 0.393817  |
| H | 2.415943  | -4.977507 | -0.203815 |
| C | 4.242747  | -0.117518 | -1.132633 |
| H | 3.173810  | -0.132961 | -1.379990 |
| H | 3.067237  | -4.192992 | 1.225640  |
| H | 4.699722  | 0.584596  | -1.847188 |
| C | 4.439481  | 0.436128  | 0.288948  |
| H | 5.517262  | 0.478838  | 0.507404  |
| H | 4.017988  | -0.257098 | 1.030324  |
| H | 2.348706  | -1.943166 | -0.060941 |
| C | 4.341848  | -2.658485 | -0.478487 |
| H | 4.822891  | -3.592911 | -0.807021 |
| H | 4.686991  | -2.496355 | 0.554079  |
| C | 3.859416  | 1.845711  | 0.521969  |
| H | 4.201272  | 2.196803  | 1.508884  |
| H | 2.442619  | -2.952668 | -1.488209 |
| H | 4.310134  | 2.540893  | -0.203241 |

Sum of electronic and zero-point Energies= -1162.314176  
Sum of electronic and thermal Energies= -1162.287673  
Sum of electronic and thermal Enthalpies= -1162.286728  
Sum of electronic and thermal Free Energies= -1162.370422

daec[n=7]-2-E2 (benzene)

|   |           |          |           |
|---|-----------|----------|-----------|
| C | -2.101501 | 2.581253 | -0.493583 |
|---|-----------|----------|-----------|

|   |           |           |           |
|---|-----------|-----------|-----------|
| H | -2.886995 | 2.914740  | -1.166140 |
| C | -2.464736 | 2.013444  | 0.742593  |
| C | -1.444019 | 1.596232  | 1.600212  |
| H | -1.688513 | 1.172107  | 2.571913  |
| C | -0.096366 | 1.727722  | 1.235988  |
| H | 0.686203  | 1.398073  | 1.913660  |
| C | 0.251783  | 2.293347  | 0.013677  |
| O | 1.545187  | 2.506213  | -0.410556 |
| C | -0.764644 | 2.730602  | -0.868743 |
| O | -0.338656 | 3.277836  | -2.040173 |
| C | -1.319334 | 3.738276  | -2.956631 |
| H | -0.764395 | 4.133447  | -3.812809 |
| H | -1.935060 | 4.541034  | -2.524789 |
| H | -1.974257 | 2.922427  | -3.297101 |
| C | 4.797514  | 0.429705  | 1.151339  |
| H | 5.673581  | -0.090676 | 1.535838  |
| C | 4.104314  | -0.102449 | 0.050939  |
| C | 4.559691  | -1.390236 | -0.610099 |
| H | 5.646820  | -1.345203 | -0.768877 |
| H | 4.109071  | -1.461023 | -1.608193 |
| C | 4.251549  | -2.678165 | 0.190822  |
| H | 4.677277  | -3.528294 | -0.363805 |
| C | 2.765015  | -2.947022 | 0.478073  |
| H | 2.361376  | -2.127448 | 1.091005  |
| H | 2.692292  | -3.852788 | 1.099576  |
| C | 1.878180  | -3.118403 | -0.764444 |
| H | 2.274009  | -3.927461 | -1.399012 |
| C | 0.408420  | -3.399062 | -0.414609 |
| H | 0.094927  | -2.686427 | 0.361500  |
| H | 0.317935  | -4.400255 | 0.036645  |
| H | 1.922462  | -2.205514 | -1.376018 |
| H | 4.792168  | -2.636591 | 1.147922  |
| C | 2.989159  | 0.596572  | -0.429779 |
| H | 2.435423  | 0.232295  | -1.292265 |
| C | 2.587131  | 1.795247  | 0.165260  |
| C | 3.284395  | 2.325450  | 1.251147  |
| H | 2.969065  | 3.270475  | 1.686340  |
| C | 4.392738  | 1.627944  | 1.742498  |
| H | 4.950569  | 2.032215  | 2.585116  |
| C | -2.581314 | -2.654792 | -0.171556 |
| C | -0.537428 | -3.279485 | -1.619024 |
| H | -0.434154 | -2.267416 | -2.042080 |
| H | -0.213876 | -3.973065 | -2.410741 |
| C | -4.676020 | -2.046346 | 1.209262  |
| H | -5.774997 | -2.011815 | 1.147249  |
| H | -4.441634 | -2.751600 | 2.021724  |
| C | -2.024244 | -3.530551 | -1.306493 |
| H | -2.179712 | -4.591287 | -1.053530 |
| C | -4.142793 | -0.660669 | 1.616970  |
| H | -3.048010 | -0.701493 | 1.689507  |
| H | -2.605782 | -3.351242 | -2.224211 |
| H | -4.502616 | -0.435280 | 2.633163  |
| C | -4.552277 | 0.495531  | 0.693974  |
| H | -5.648762 | 0.592144  | 0.709543  |
| H | -4.277713 | 0.273467  | -0.347306 |
| H | -2.200912 | -1.629095 | -0.288284 |
| C | -4.116493 | -2.624262 | -0.105786 |
| H | -4.507521 | -3.646998 | -0.222269 |
| H | -4.502625 | -2.058492 | -0.967183 |
| C | -3.933165 | 1.858736  | 1.094018  |
| H | -4.500307 | 2.658341  | 0.597588  |
| H | -2.187236 | -3.012992 | 0.791259  |
| H | -4.073683 | 2.007581  | 2.174761  |

Sum of electronic and zero-point Energies= -1162.320417  
Sum of electronic and thermal Energies= -1162.292896  
Sum of electronic and thermal Enthalpies= -1162.291952  
Sum of electronic and thermal Free Energies= -1162.379267

daec[n=7]-2-E1 (benzene)

|   |           |          |          |
|---|-----------|----------|----------|
| C | -1.247095 | 2.548939 | 0.363317 |
|---|-----------|----------|----------|

|   |           |           |           |
|---|-----------|-----------|-----------|
| H | -1.802195 | 2.686384  | 1.286219  |
| C | -1.952685 | 2.491598  | -0.853561 |
| C | -1.224974 | 2.346402  | -2.039453 |
| H | -1.746956 | 2.307910  | -2.993846 |
| C | 0.173834  | 2.289160  | -2.016878 |
| H | 0.747353  | 2.225301  | -2.938874 |
| C | 0.864765  | 2.363911  | -0.812976 |
| O | 2.240097  | 2.498402  | -0.812737 |
| C | 0.149840  | 2.479242  | 0.400592  |
| O | 0.905108  | 2.551194  | 1.527789  |
| C | 0.241335  | 2.670069  | 2.778213  |
| H | 1.032053  | 2.683306  | 3.533910  |
| H | -0.424423 | 1.815425  | 2.966418  |
| H | -0.335925 | 3.603826  | 2.842935  |
| C | 4.947068  | -0.438394 | 0.355666  |
| H | 5.697006  | -1.179475 | 0.628200  |
| C | 3.835661  | -0.827735 | -0.409387 |
| C | 3.709257  | -2.266138 | -0.880254 |
| H | 4.666625  | -2.566870 | -1.330244 |
| H | 2.966180  | -2.324484 | -1.685842 |
| C | 3.364811  | -3.289521 | 0.227874  |
| H | 3.533091  | -4.300612 | -0.173494 |
| C | 1.932221  | -3.201045 | 0.779968  |
| H | 1.735234  | -2.173802 | 1.122159  |
| H | 1.859578  | -3.838357 | 1.674471  |
| C | 0.847010  | -3.621082 | -0.222474 |
| H | 1.026804  | -4.659495 | -0.544065 |
| C | -0.580618 | -3.487410 | 0.325344  |
| H | -0.698366 | -2.478836 | 0.746835  |
| H | -0.728344 | -4.187465 | 1.163336  |
| H | 0.926697  | -3.007099 | -1.131901 |
| H | 4.079487  | -3.166111 | 1.054273  |
| C | 2.887970  | 0.144896  | -0.764220 |
| H | 2.026281  | -0.125199 | -1.371182 |
| C | 3.066874  | 1.477842  | -0.377666 |
| C | 4.176057  | 1.858519  | 0.379955  |
| H | 4.288006  | 2.901652  | 0.663321  |
| C | 5.112354  | 0.891259  | 0.746896  |
| H | 5.981655  | 1.180917  | 1.334737  |
| C | -3.343032 | -2.093132 | 0.319312  |
| C | -1.654973 | -3.720475 | -0.747251 |
| H | -1.451509 | -3.045932 | -1.594570 |
| H | -1.559559 | -4.742568 | -1.145288 |
| C | -5.099762 | -0.384950 | 1.133479  |
| H | -6.154411 | -0.101392 | 0.993365  |
| H | -4.990104 | -0.622241 | 2.203072  |
| C | -3.103708 | -3.488817 | -0.283177 |
| H | -3.394804 | -4.258257 | 0.448844  |
| C | -4.202790 | 0.828560  | 0.823950  |
| H | -3.161815 | 0.585510  | 1.075521  |
| H | -3.768844 | -3.629772 | -1.149198 |
| H | -4.492951 | 1.648750  | 1.499663  |
| C | -4.274507 | 1.337266  | -0.622337 |
| H | -5.325805 | 1.542759  | -0.876807 |
| H | -3.936653 | 0.557019  | -1.319085 |
| H | -2.750603 | -1.355729 | -0.242615 |
| C | -4.815780 | -1.659958 | 0.316200  |
| H | -5.439424 | -2.473346 | 0.718259  |
| H | -5.143153 | -1.521013 | -0.725366 |
| C | -3.465179 | 2.630442  | -0.884719 |
| H | -3.754109 | 3.020792  | -1.869938 |
| H | -2.956837 | -2.065055 | 1.349176  |
| H | -3.774621 | 3.390106  | -0.151297 |

Sum of electronic and zero-point Energies= -1162.320463  
Sum of electronic and thermal Energies= -1162.292921  
Sum of electronic and thermal Enthalpies= -1162.291977  
Sum of electronic and thermal Free Energies= -1162.379953

daec[n=7]-3-TS (benzene)

|   |           |           |          |
|---|-----------|-----------|----------|
| C | -1.694852 | -3.573981 | 0.213292 |
|---|-----------|-----------|----------|

|   |           |           |           |
|---|-----------|-----------|-----------|
| H | -2.039476 | -4.589603 | 0.401352  |
| C | -0.327032 | -3.261531 | 0.271430  |
| C | 0.030435  | -1.935324 | 0.006778  |
| H | 1.070528  | -1.632143 | 0.002354  |
| C | -0.926159 | -0.958101 | -0.267403 |
| H | -0.596959 | 0.058947  | -0.437011 |
| C | -2.282755 | -1.276295 | -0.302415 |
| O | -3.291180 | -0.366784 | -0.580226 |
| C | -2.669683 | -2.612118 | -0.068829 |
| O | -3.989994 | -2.987436 | -0.042528 |
| C | -4.661476 | -2.972637 | -1.304766 |
| H | -5.678671 | -3.329958 | -1.112378 |
| H | -4.170036 | -3.650752 | -2.018776 |
| H | -4.705025 | -1.962723 | -1.729845 |
| C | -3.081746 | 3.540411  | 0.871863  |
| H | -3.030068 | 4.549686  | 1.277448  |
| C | -2.169124 | 3.143182  | -0.117039 |
| C | -1.017422 | 4.037540  | -0.530941 |
| H | -1.366439 | 5.065532  | -0.706278 |
| H | -0.598042 | 3.680393  | -1.481287 |
| C | 0.083812  | 4.061669  | 0.557362  |
| H | -0.332984 | 4.547027  | 1.451134  |
| C | 1.380775  | 4.784008  | 0.145769  |
| H | 1.911505  | 5.098127  | 1.057306  |
| H | 1.121143  | 5.713035  | -0.384914 |
| C | 2.362193  | 3.967422  | -0.718432 |
| H | 3.155209  | 4.648742  | -1.063248 |
| C | 3.022880  | 2.778503  | 0.005781  |
| H | 2.281235  | 1.986754  | 0.184548  |
| H | 3.361905  | 3.107169  | 1.001458  |
| H | 1.861271  | 3.609203  | -1.631407 |
| H | 0.310735  | 3.030154  | 0.860667  |
| C | -2.271911 | 1.846644  | -0.640418 |
| H | -1.617812 | 1.542361  | -1.452800 |
| C | -3.195674 | 0.938801  | -0.113901 |
| C | -4.097487 | 1.337156  | 0.874480  |
| H | -4.816682 | 0.617916  | 1.257541  |
| C | -4.047293 | 2.650160  | 1.348431  |
| H | -4.753175 | 2.972866  | 2.111391  |
| C | 4.192311  | -0.327189 | -0.202839 |
| C | 4.228685  | 2.207696  | -0.760129 |
| H | 3.916522  | 1.916155  | -1.775944 |
| H | 4.961187  | 3.018389  | -0.894039 |
| C | 4.354708  | -2.893618 | 0.041926  |
| H | 4.155001  | -2.924593 | -1.040652 |
| H | 5.094301  | -3.685700 | 0.229237  |
| C | 4.936488  | 1.013522  | -0.088387 |
| H | 5.123735  | 1.247104  | 0.971808  |
| C | 3.053039  | -3.217271 | 0.807821  |
| H | 2.535612  | -2.284325 | 1.056586  |
| H | 5.928892  | 0.894749  | -0.549701 |
| H | 3.297119  | -3.676854 | 1.777556  |
| C | 2.109662  | -4.152419 | 0.024503  |
| H | 2.588067  | -5.139887 | -0.052082 |
| H | 2.012876  | -3.787237 | -1.008583 |
| H | 3.212125  | -0.251738 | 0.289970  |
| C | 4.978736  | -1.522170 | 0.368951  |
| H | 5.998561  | -1.495853 | -0.044627 |
| H | 5.091025  | -1.408811 | 1.458810  |
| C | 0.694723  | -4.337936 | 0.618164  |
| H | 0.773422  | -4.421959 | 1.714694  |
| H | 3.984390  | -0.520903 | -1.267682 |
| H | 0.293395  | -5.304244 | 0.283115  |

Sum of electronic and zero-point Energies= -1162.307221  
Sum of electronic and thermal Energies= -1162.280125  
Sum of electronic and thermal Enthalpies= -1162.279181  
Sum of electronic and thermal Free Energies= -1162.365296

daec[n=7]-3-E1 (benzene)

|   |          |           |           |
|---|----------|-----------|-----------|
| C | 0.196450 | -3.706037 | -0.192444 |
|---|----------|-----------|-----------|

|   |           |           |           |
|---|-----------|-----------|-----------|
| H | 0.637204  | -4.462007 | -0.839984 |
| C | 0.874646  | -3.258637 | 0.950075  |
| C | 0.245085  | -2.293317 | 1.747803  |
| H | 0.738261  | -1.932562 | 2.648747  |
| C | -1.016939 | -1.795255 | 1.417390  |
| H | -1.503650 | -1.061881 | 2.055422  |
| C | -1.675685 | -2.245681 | 0.271043  |
| O | -2.963720 | -1.861587 | -0.046107 |
| C | -1.063350 | -3.216174 | -0.546342 |
| O | -1.683287 | -3.760952 | -1.641003 |
| C | -1.983886 | -2.868574 | -2.716914 |
| H | -2.335593 | -3.498502 | -3.540619 |
| H | -1.083648 | -2.324443 | -3.039366 |
| H | -2.769017 | -2.152470 | -2.449364 |
| C | -4.352395 | 2.050604  | 0.283216  |
| H | -4.744364 | 3.064098  | 0.352297  |
| C | -3.022523 | 1.849189  | -0.117413 |
| C | -2.117014 | 3.026907  | -0.418451 |
| H | -2.713338 | 3.845812  | -0.846421 |
| H | -1.386084 | 2.738892  | -1.185679 |
| C | -1.379016 | 3.549980  | 0.833586  |
| H | -2.124705 | 3.766488  | 1.612293  |
| C | -0.544162 | 4.820780  | 0.591545  |
| H | -0.159572 | 5.170097  | 1.562222  |
| H | -1.213734 | 5.616071  | 0.228648  |
| C | 0.638025  | 4.690235  | -0.386984 |
| H | 1.079632  | 5.689668  | -0.522006 |
| C | 1.741997  | 3.720105  | 0.061158  |
| H | 1.333249  | 2.702645  | 0.134125  |
| H | 2.070113  | 3.989459  | 1.078365  |
| H | 0.273011  | 4.391864  | -1.381589 |
| H | -0.746549 | 2.747954  | 1.240179  |
| C | -2.536753 | 0.537142  | -0.209759 |
| H | -1.513002 | 0.357712  | -0.530349 |
| C | -3.365132 | -0.546010 | 0.103133  |
| C | -4.688851 | -0.341394 | 0.500454  |
| H | -5.313385 | -1.201318 | 0.728272  |
| C | -5.176150 | 0.963710  | 0.584861  |
| H | -6.207681 | 1.131509  | 0.888842  |
| C | 3.784125  | 1.290451  | -0.553376 |
| C | 2.960066  | 3.724009  | -0.876482 |
| H | 2.636451  | 3.459729  | -1.896181 |
| H | 3.348500  | 4.752101  | -0.941294 |
| C | 4.701053  | -1.119939 | -0.324828 |
| H | 4.442698  | -1.322991 | -1.376545 |
| H | 5.638713  | -1.664545 | -0.133829 |
| C | 4.107142  | 2.789072  | -0.451878 |
| H | 4.406768  | 3.029009  | 0.580997  |
| C | 3.600150  | -1.688178 | 0.583456  |
| H | 2.652997  | -1.167318 | 0.390139  |
| H | 4.986792  | 3.003533  | -1.078248 |
| H | 3.854052  | -1.479593 | 1.635705  |
| C | 3.385848  | -3.196893 | 0.404088  |
| H | 4.320015  | -3.730016 | 0.637472  |
| H | 3.166440  | -3.411347 | -0.652991 |
| H | 2.912879  | 1.058110  | 0.073646  |
| C | 4.961012  | 0.387534  | -0.151758 |
| H | 5.841413  | 0.663868  | -0.752420 |
| H | 5.234373  | 0.591416  | 0.895998  |
| C | 2.257083  | -3.786191 | 1.281780  |
| H | 2.480366  | -3.581645 | 2.338535  |
| H | 3.486245  | 1.056029  | -1.588547 |
| H | 2.265248  | -4.879746 | 1.168669  |

Sum of electronic and zero-point Energies= -1162.324213  
Sum of electronic and thermal Energies= -1162.296249  
Sum of electronic and thermal Enthalpies= -1162.295305  
Sum of electronic and thermal Free Energies= -1162.384650

daec[n=7]-3-E2 (benzene)

|   |          |           |          |
|---|----------|-----------|----------|
| C | 0.049509 | -2.826392 | 1.042884 |
|---|----------|-----------|----------|

|   |           |           |           |
|---|-----------|-----------|-----------|
| H | 0.471737  | -2.768828 | 2.044413  |
| C | 0.746234  | -3.470298 | 0.011177  |
| C | 0.146491  | -3.521235 | -1.256910 |
| H | 0.656195  | -4.025072 | -2.076546 |
| C | -1.100924 | -2.939067 | -1.484846 |
| H | -1.571286 | -2.981717 | -2.464520 |
| C | -1.783105 | -2.302809 | -0.446610 |
| O | -3.064115 | -1.838557 | -0.681048 |
| C | -1.207544 | -2.250106 | 0.835121  |
| O | -1.833608 | -1.609514 | 1.874913  |
| C | -2.948085 | -2.312216 | 2.434864  |
| H | -3.347989 | -1.669555 | 3.225520  |
| H | -2.626454 | -3.269754 | 2.870837  |
| H | -3.728903 | -2.498216 | 1.686895  |
| C | -4.148349 | 2.181334  | -0.652589 |
| H | -4.461630 | 3.224063  | -0.658259 |
| C | -2.781393 | 1.869770  | -0.668427 |
| C | -1.744583 | 2.975749  | -0.649937 |
| H | -2.166334 | 3.872251  | -1.127316 |
| H | -0.876914 | 2.679284  | -1.254684 |
| C | -1.282795 | 3.340856  | 0.778576  |
| H | -2.173272 | 3.485590  | 1.407123  |
| C | -0.423165 | 4.615706  | 0.860562  |
| H | -0.192783 | 4.807881  | 1.919968  |
| H | -1.032284 | 5.469504  | 0.524779  |
| C | 0.891751  | 4.613136  | 0.060176  |
| H | 1.357468  | 5.605253  | 0.166241  |
| C | 1.906897  | 3.541858  | 0.484947  |
| H | 1.480294  | 2.543358  | 0.316034  |
| H | 2.084630  | 3.616601  | 1.570114  |
| H | 0.675928  | 4.501022  | -1.013346 |
| H | -0.746792 | 2.485346  | 1.213360  |
| C | -2.390093 | 0.521473  | -0.668695 |
| H | -1.334497 | 0.261621  | -0.689758 |
| C | -3.355411 | -0.488035 | -0.643021 |
| C | -4.718686 | -0.173461 | -0.629558 |
| H | -5.447764 | -0.979920 | -0.623202 |
| C | -5.106914 | 1.164835  | -0.635369 |
| H | -6.166202 | 1.415462  | -0.629675 |
| C | 3.945665  | 1.179010  | -0.338855 |
| C | 3.248389  | 3.667115  | -0.254725 |
| H | 3.069168  | 3.630278  | -1.341449 |
| H | 3.668043  | 4.664741  | -0.052949 |
| C | 4.744126  | -1.273207 | -0.524447 |
| H | 4.586106  | -1.234078 | -1.614242 |
| H | 5.638983  | -1.896196 | -0.371434 |
| C | 4.296318  | 2.603175  | 0.117793  |
| H | 4.451615  | 2.610370  | 1.208633  |
| C | 3.541080  | -1.963408 | 0.136275  |
| H | 2.636064  | -1.357783 | -0.006119 |
| H | 5.262386  | 2.888788  | -0.326502 |
| H | 3.706120  | -2.014736 | 1.224846  |
| C | 3.288397  | -3.376113 | -0.405641 |
| H | 4.191408  | -3.989219 | -0.264134 |
| H | 3.121116  | -3.325543 | -1.492319 |
| H | 2.995375  | 0.870046  | 0.116759  |
| C | 5.034219  | 0.147065  | -0.007118 |
| H | 5.989402  | 0.489280  | -0.434619 |
| H | 5.186093  | 0.113836  | 1.083695  |
| C | 2.100649  | -4.108739 | 0.257110  |
| H | 2.278877  | -4.175834 | 1.339397  |
| H | 3.774532  | 1.183349  | -1.427880 |
| H | 2.081280  | -5.142891 | -0.116983 |

Sum of electronic and zero-point Energies= -1162.324887  
Sum of electronic and thermal Energies= -1162.296937  
Sum of electronic and thermal Enthalpies= -1162.295993  
Sum of electronic and thermal Free Energies= -1162.385143

daec[n=7]-4-TS (benzene)

|   |          |          |          |
|---|----------|----------|----------|
| C | 0.358164 | 3.497192 | 0.266823 |
|---|----------|----------|----------|

|   |           |           |           |
|---|-----------|-----------|-----------|
| H | 0.553180  | 4.459385  | 0.733014  |
| C | 1.416235  | 2.575163  | 0.151432  |
| C | 1.146938  | 1.339539  | -0.438666 |
| H | 1.928213  | 0.597785  | -0.549493 |
| C | -0.134393 | 1.031642  | -0.905453 |
| H | -0.321466 | 0.071609  | -1.376712 |
| C | -1.178351 | 1.936611  | -0.773774 |
| O | -2.452350 | 1.658039  | -1.248419 |
| C | -0.934230 | 3.194700  | -0.178535 |
| O | -2.006924 | 4.025917  | -0.071631 |
| C | -1.805410 | 5.306776  | 0.507489  |
| H | -2.780433 | 5.802307  | 0.480397  |
| H | -1.082006 | 5.902789  | -0.067727 |
| H | -1.466922 | 5.232923  | 1.551469  |
| C | -4.620868 | -1.335561 | 0.689991  |
| H | -5.196319 | -2.107243 | 1.199259  |
| C | -3.694399 | -1.700584 | -0.300553 |
| C | -3.437778 | -3.158303 | -0.636354 |
| H | -2.821227 | -3.218693 | -1.542994 |
| H | -4.390103 | -3.652497 | -0.879037 |
| C | -2.767783 | -3.953596 | 0.510687  |
| H | -3.431880 | -3.918287 | 1.386335  |
| C | -1.368846 | -3.472429 | 0.937502  |
| H | -1.129826 | -3.933660 | 1.907820  |
| H | -1.395680 | -2.388150 | 1.120301  |
| C | -0.227777 | -3.799832 | -0.040123 |
| H | -0.176151 | -4.891597 | -0.180390 |
| C | 1.133624  | -3.282235 | 0.452564  |
| H | 1.288970  | -3.618214 | 1.490340  |
| H | 1.102089  | -2.183127 | 0.496637  |
| H | -0.439452 | -3.376915 | -1.034193 |
| H | -2.715620 | -5.011866 | 0.212379  |
| C | -2.985621 | -0.683267 | -0.953142 |
| H | -2.293080 | -0.931859 | -1.753247 |
| C | -3.160372 | 0.655862  | -0.591850 |
| C | -4.078409 | 1.012000  | 0.396242  |
| H | -4.199679 | 2.060772  | 0.653228  |
| C | -4.814832 | 0.005641  | 1.027649  |
| H | -5.540935 | 0.271268  | 1.793951  |
| C | 3.950051  | -1.720123 | -0.379209 |
| C | 2.333912  | -3.743326 | -0.391014 |
| H | 2.172781  | -3.480147 | -1.448768 |
| H | 2.380270  | -4.842337 | -0.357902 |
| C | 5.606383  | 0.286169  | -0.235612 |
| H | 6.414204  | 0.673263  | 0.404981  |
| H | 6.068705  | 0.087099  | -1.214789 |
| C | 3.683038  | -3.163882 | 0.083121  |
| H | 4.504465  | -3.803236 | -0.273250 |
| C | 4.547961  | 1.390199  | -0.428639 |
| H | 3.821829  | 1.069488  | -1.186291 |
| H | 3.722624  | -3.210182 | 1.183189  |
| H | 5.048626  | 2.270302  | -0.861173 |
| C | 3.826843  | 1.829185  | 0.858218  |
| H | 4.588106  | 2.177775  | 1.572149  |
| H | 3.338035  | 0.970582  | 1.339539  |
| H | 3.041006  | -1.120980 | -0.235035 |
| C | 5.120286  | -1.051113 | 0.359842  |
| H | 5.977217  | -1.742572 | 0.374090  |
| H | 4.837462  | -0.910602 | 1.413966  |
| C | 2.793679  | 2.962127  | 0.678386  |
| H | 2.650305  | 3.459284  | 1.648882  |
| H | 4.143796  | -1.722489 | -1.463738 |
| H | 3.224809  | 3.735042  | 0.021074  |

Sum of electronic and zero-point Energies= -1162.313006  
Sum of electronic and thermal Energies= -1162.286404  
Sum of electronic and thermal Enthalpies= -1162.285460  
Sum of electronic and thermal Free Energies= -1162.369299

daec[n=7]-4-E1 (benzene)

|   |          |          |          |
|---|----------|----------|----------|
| C | 0.891540 | 2.173690 | 1.082698 |
|---|----------|----------|----------|

|   |           |           |           |
|---|-----------|-----------|-----------|
| H | 1.320343  | 1.880474  | 2.037203  |
| C | 1.729522  | 2.752006  | 0.110488  |
| C | 1.166478  | 3.143578  | -1.107291 |
| H | 1.792051  | 3.595908  | -1.874213 |
| C | -0.205549 | 2.990814  | -1.338286 |
| H | -0.658961 | 3.326053  | -2.268215 |
| C | -1.034805 | 2.452712  | -0.360962 |
| O | -2.399853 | 2.520999  | -0.552220 |
| C | -0.482640 | 2.023951  | 0.869062  |
| O | -1.362868 | 1.523720  | 1.775668  |
| C | -0.863733 | 1.078366  | 3.029439  |
| H | -1.733060 | 0.706190  | 3.578891  |
| H | -0.402214 | 1.900323  | 3.595538  |
| H | -0.135822 | 0.263267  | 2.908366  |
| C | -5.046547 | -0.686136 | -0.562570 |
| H | -5.766555 | -1.502870 | -0.582240 |
| C | -3.697866 | -0.947527 | -0.850756 |
| C | -3.263290 | -2.367544 | -1.161519 |
| H | -2.358222 | -2.354940 | -1.783671 |
| H | -4.045102 | -2.846783 | -1.766899 |
| C | -3.019734 | -3.236981 | 0.098646  |
| H | -3.853588 | -3.078654 | 0.796694  |
| C | -1.682603 | -2.964143 | 0.810637  |
| H | -1.731321 | -3.354151 | 1.838344  |
| H | -1.535877 | -1.877704 | 0.907576  |
| C | -0.477224 | -3.596347 | 0.096712  |
| H | -0.552667 | -4.692843 | 0.173468  |
| C | 0.883012  | -3.133515 | 0.633839  |
| H | 0.924738  | -3.281023 | 1.724945  |
| H | 0.971626  | -2.048855 | 0.471781  |
| H | -0.519295 | -3.369412 | -0.979634 |
| H | -3.059270 | -4.297747 | -0.192099 |
| C | -2.782518 | 0.116784  | -0.835444 |
| H | -1.735866 | -0.056012 | -1.076499 |
| C | -3.215717 | 1.410106  | -0.525683 |
| C | -4.560727 | 1.664350  | -0.242349 |
| H | -4.867838 | 2.681745  | -0.014046 |
| C | -5.471753 | 0.609577  | -0.263757 |
| H | -6.521310 | 0.802530  | -0.048683 |
| C | 3.686293  | -1.930083 | -0.527662 |
| C | 2.069025  | -3.863865 | -0.018585 |
| H | 1.914982  | -3.907440 | -1.108737 |
| H | 2.072083  | -4.908823 | 0.326204  |
| C | 5.330709  | -0.010880 | -1.059260 |
| H | 6.315432  | 0.383980  | -0.764249 |
| H | 5.435641  | -0.332626 | -2.106974 |
| C | 3.441241  | -3.225049 | 0.262188  |
| H | 4.235190  | -3.946082 | 0.014973  |
| C | 4.301028  | 1.133736  | -1.003649 |
| H | 3.334523  | 0.791890  | -1.399137 |
| H | 3.539318  | -3.025433 | 1.341519  |
| H | 4.637833  | 1.929726  | -1.686054 |
| C | 4.101497  | 1.736814  | 0.393381  |
| H | 5.082654  | 2.019022  | 0.805722  |
| H | 3.688859  | 0.981903  | 1.078023  |
| H | 2.860023  | -1.228399 | -0.347943 |
| C | 5.017749  | -1.244999 | -0.192608 |
| H | 5.837157  | -1.970101 | -0.315542 |
| H | 5.024564  | -0.966699 | 0.872172  |
| C | 3.197170  | 2.988975  | 0.419028  |
| H | 3.275152  | 3.446991  | 1.416020  |
| H | 3.657297  | -2.160126 | -1.605115 |
| H | 3.595925  | 3.728614  | -0.289507 |

Sum of electronic and zero-point Energies= -1162.323589  
Sum of electronic and thermal Energies= -1162.296058  
Sum of electronic and thermal Enthalpies= -1162.295114  
Sum of electronic and thermal Free Energies= -1162.383360

daec[n=7]-4-E2 (benzene)

|   |          |          |          |
|---|----------|----------|----------|
| C | 1.654144 | 2.868019 | 0.040982 |
|---|----------|----------|----------|

|   |           |           |           |
|---|-----------|-----------|-----------|
| H | 2.461737  | 3.423526  | -0.426852 |
| C | 1.940456  | 2.071829  | 1.164466  |
| C | 0.889942  | 1.369332  | 1.761155  |
| H | 1.076335  | 0.756277  | 2.641515  |
| C | -0.414076 | 1.458559  | 1.258018  |
| H | -1.225926 | 0.925825  | 1.745305  |
| C | -0.687309 | 2.247411  | 0.143296  |
| O | -1.944410 | 2.440530  | -0.384072 |
| C | 0.360328  | 2.964222  | -0.479449 |
| O | 0.007457  | 3.715364  | -1.558263 |
| C | 1.022878  | 4.458756  | -2.214198 |
| H | 0.525974  | 4.976676  | -3.039989 |
| H | 1.808968  | 3.804735  | -2.619922 |
| H | 1.479422  | 5.202849  | -1.544985 |
| C | -5.128043 | -0.125882 | 0.383600  |
| H | -5.983029 | -0.776793 | 0.560883  |
| C | -4.038493 | -0.606100 | -0.363443 |
| C | -4.043881 | -2.024975 | -0.899569 |
| H | -3.346245 | -2.102118 | -1.743773 |
| H | -5.041391 | -2.248402 | -1.303669 |
| C | -3.703591 | -3.099094 | 0.162743  |
| H | -4.386901 | -2.971663 | 1.014794  |
| C | -2.251768 | -3.079793 | 0.671493  |
| H | -2.190242 | -3.690742 | 1.584702  |
| H | -1.985365 | -2.056850 | 0.976410  |
| C | -1.215849 | -3.601662 | -0.336673 |
| H | -1.422713 | -4.663096 | -0.548045 |
| C | 0.231595  | -3.445286 | 0.150120  |
| H | 0.336273  | -3.910417 | 1.143564  |
| H | 0.440879  | -2.374887 | 0.294418  |
| H | -1.323365 | -3.077273 | -1.298272 |
| H | -3.925602 | -4.089527 | -0.262902 |
| C | -2.956379 | 0.254010  | -0.592556 |
| H | -2.105071 | -0.075008 | -1.184820 |
| C | -2.966097 | 1.556602  | -0.081535 |
| C | -4.049946 | 2.028222  | 0.658583  |
| H | -4.037605 | 3.048806  | 1.032431  |
| C | -5.134730 | 1.176000  | 0.885236  |
| H | -5.990776 | 1.535132  | 1.453400  |
| C | 3.219254  | -2.373045 | -0.665552 |
| C | 1.270356  | -4.063070 | -0.799167 |
| H | 1.109104  | -3.682111 | -1.820467 |
| H | 1.095685  | -5.148546 | -0.851319 |
| C | 5.217375  | -0.731421 | -0.513183 |
| H | 6.215208  | -0.636506 | -0.057053 |
| H | 5.381751  | -0.728616 | -1.601965 |
| C | 2.731640  | -3.804167 | -0.387665 |
| H | 3.389024  | -4.508820 | -0.919401 |
| C | 4.380251  | 0.509366  | -0.149633 |
| H | 3.426103  | 0.485695  | -0.693525 |
| H | 2.850414  | -4.031856 | 0.683995  |
| H | 4.912206  | 1.401193  | -0.517218 |
| C | 4.107500  | 0.681068  | 1.350825  |
| H | 5.063744  | 0.675846  | 1.896942  |
| H | 3.533513  | -0.176376 | 1.729915  |
| H | 2.507591  | -1.650493 | -0.242583 |
| C | 4.622240  | -2.093114 | -0.107519 |
| H | 5.309767  | -2.882855 | -0.448405 |
| H | 4.594776  | -2.177301 | 0.989443  |
| C | 3.353679  | 1.982071  | 1.711113  |
| H | 3.319696  | 2.066625  | 2.806972  |
| H | 3.215177  | -2.199900 | -1.753986 |
| H | 3.937653  | 2.842675  | 1.354216  |

Sum of electronic and zero-point Energies= -1162.323777  
Sum of electronic and thermal Energies= -1162.296303  
Sum of electronic and thermal Enthalpies= -1162.295359  
Sum of electronic and thermal Free Energies= -1162.382555

daec[n=8]-1-TS (benzene)

|   |           |          |          |
|---|-----------|----------|----------|
| C | -4.019956 | 1.201183 | 0.057995 |
|---|-----------|----------|----------|

|   |           |           |           |
|---|-----------|-----------|-----------|
| H | -4.946360 | 1.694660  | 0.339934  |
| C | -2.901549 | 1.994892  | -0.266380 |
| C | -1.726780 | 1.338440  | -0.627976 |
| H | -0.841063 | 1.895834  | -0.912382 |
| C | -1.651172 | -0.059823 | -0.642235 |
| H | -0.709927 | -0.527557 | -0.900661 |
| C | -2.754637 | -0.838868 | -0.319432 |
| O | -2.790724 | -2.220783 | -0.335388 |
| C | -3.968328 | -0.194977 | 0.029453  |
| O | -5.012032 | -1.016394 | 0.326896  |
| C | -6.251839 | -0.421114 | 0.676078  |
| H | -6.649618 | 0.199669  | -0.140230 |
| H | -6.169299 | 0.188655  | 1.588095  |
| H | -6.939065 | -1.251999 | 0.862007  |
| C | 0.503142  | -4.582709 | 0.656966  |
| H | 1.354312  | -5.199168 | 0.941944  |
| C | 0.593301  | -3.750525 | -0.468665 |
| C | 1.894614  | -3.582270 | -1.227579 |
| H | 1.695022  | -3.067855 | -2.177973 |
| H | 2.328980  | -4.559005 | -1.485511 |
| C | 2.926659  | -2.766787 | -0.410373 |
| H | 2.406784  | -1.935009 | 0.084228  |
| C | 4.086052  | -2.215867 | -1.254587 |
| H | 3.701924  | -1.419497 | -1.909955 |
| H | 4.455088  | -3.004658 | -1.928298 |
| C | 5.281725  | -1.697779 | -0.430799 |
| H | 6.032018  | -1.285096 | -1.122967 |
| C | 4.977498  | -0.655452 | 0.661903  |
| H | 5.905574  | -0.485335 | 1.229479  |
| H | 4.264200  | -1.077887 | 1.385460  |
| H | 5.763327  | -2.561133 | 0.054216  |
| H | 3.318966  | -3.400065 | 0.399634  |
| C | -0.524104 | -2.983288 | -0.828068 |
| H | -0.492227 | -2.387587 | -1.735644 |
| C | -1.671458 | -2.975685 | -0.027936 |
| C | -1.752886 | -3.803995 | 1.094360  |
| H | -2.661386 | -3.796853 | 1.690873  |
| C | -0.666868 | -4.619237 | 1.419902  |
| H | -0.728454 | -5.273841 | 2.287370  |
| C | 2.437680  | 3.248031  | 0.362105  |
| C | 4.452631  | 0.706706  | 0.178159  |
| H | 5.158063  | 1.132196  | -0.554039 |
| H | 3.499744  | 0.575659  | -0.354743 |
| C | 0.660061  | 4.879179  | -0.577074 |
| H | 0.517169  | 5.942863  | -0.822038 |
| H | 0.748674  | 4.359989  | -1.545089 |
| C | 4.271408  | 1.692945  | 1.345603  |
| H | 5.222213  | 1.751854  | 1.897927  |
| H | 3.538538  | 1.277108  | 2.055574  |
| C | -0.590149 | 4.360679  | 0.154729  |
| H | -0.794842 | 4.995157  | 1.031136  |
| H | -0.394152 | 3.359297  | 0.555306  |
| C | -1.836599 | 4.324312  | -0.751836 |
| H | -1.560531 | 3.927277  | -1.740102 |
| H | -2.173231 | 5.355584  | -0.931986 |
| C | 1.986069  | 4.708990  | 0.186796  |
| H | 2.772001  | 5.257095  | -0.355550 |
| H | 1.911460  | 5.188726  | 1.175674  |
| C | -3.027230 | 3.513616  | -0.206989 |
| H | 1.725017  | 2.709961  | 1.005007  |
| C | 3.845172  | 3.122556  | 0.966525  |
| H | 3.893876  | 3.745335  | 1.873394  |
| H | 4.580859  | 3.551825  | 0.267636  |
| H | -3.221571 | 3.813907  | 0.835667  |
| H | -3.931452 | 3.803860  | -0.762802 |
| H | 2.406663  | 2.744525  | -0.616513 |

Sum of electronic and zero-point Energies= -1201.597466  
Sum of electronic and thermal Energies= -1201.569337  
Sum of electronic and thermal Enthalpies= -1201.568393  
Sum of electronic and thermal Free Energies= -1201.656580



## daec[n=8]-1-E1 (benzene)

|   |           |           |           |
|---|-----------|-----------|-----------|
| C | -2.218191 | 2.778655  | -0.485155 |
| H | -2.350936 | 3.278169  | -1.440991 |
| C | -1.383969 | 3.370752  | 0.481040  |
| C | -1.233002 | 2.735304  | 1.717250  |
| H | -0.601927 | 3.181041  | 2.483374  |
| C | -1.891294 | 1.528478  | 1.980473  |
| H | -1.787063 | 1.028832  | 2.940850  |
| C | -2.711410 | 0.947903  | 1.021233  |
| O | -3.437947 | -0.181435 | 1.347661  |
| C | -2.890802 | 1.578989  | -0.230437 |
| O | -3.730145 | 0.953932  | -1.096224 |
| C | -3.933232 | 1.536272  | -2.376426 |
| H | -2.994453 | 1.600072  | -2.945482 |
| H | -4.381955 | 2.537092  | -2.298736 |
| H | -4.626298 | 0.870529  | -2.898593 |
| C | -2.626990 | -3.963309 | -0.196493 |
| H | -2.441147 | -4.962044 | -0.588427 |
| C | -1.714744 | -2.933278 | -0.462279 |
| C | -0.451286 | -3.202095 | -1.255633 |
| H | -0.198215 | -2.316563 | -1.856680 |
| H | -0.634303 | -4.019492 | -1.967770 |
| C | 0.762828  | -3.567838 | -0.375142 |
| H | 0.938978  | -2.751911 | 0.339917  |
| C | 2.029181  | -3.836546 | -1.201250 |
| H | 2.258154  | -2.948775 | -1.809678 |
| H | 1.818127  | -4.642465 | -1.921090 |
| C | 3.268583  | -4.237574 | -0.378797 |
| H | 4.088142  | -4.464273 | -1.078358 |
| C | 3.765404  | -3.201384 | 0.647225  |
| H | 4.638517  | -3.623806 | 1.168260  |
| H | 3.000684  | -3.050657 | 1.424005  |
| H | 3.054564  | -5.178860 | 0.150718  |
| H | 0.517974  | -4.454749 | 0.228956  |
| C | -1.971452 | -1.648962 | 0.043412  |
| H | -1.272014 | -0.839991 | -0.153179 |
| C | -3.123479 | -1.404384 | 0.794959  |
| C | -4.031188 | -2.436499 | 1.060018  |
| H | -4.921185 | -2.219368 | 1.645240  |
| C | -3.774570 | -3.712152 | 0.561916  |
| H | -4.480684 | -4.516317 | 0.761495  |
| C | 3.813905  | 1.330396  | 0.046510  |
| C | 4.148048  | -1.838673 | 0.050791  |
| H | 4.895577  | -1.982432 | -0.746551 |
| H | 3.268224  | -1.395775 | -0.435059 |
| C | 2.956925  | 3.543706  | -0.976848 |
| H | 3.309278  | 4.535326  | -1.300761 |
| H | 2.648112  | 3.017936  | -1.894701 |
| C | 4.702069  | -0.857374 | 1.095359  |
| H | 5.608584  | -1.290143 | 1.545898  |
| H | 3.974675  | -0.758032 | 1.917150  |
| C | 1.734319  | 3.720284  | -0.063536 |
| H | 2.041514  | 4.240831  | 0.858300  |
| H | 1.361133  | 2.737133  | 0.252074  |
| C | 0.590836  | 4.499426  | -0.726616 |
| H | 0.302337  | 3.998558  | -1.663503 |
| H | 0.947670  | 5.500783  | -1.011730 |
| C | 4.132685  | 2.784021  | -0.335763 |
| H | 4.979562  | 2.790954  | -1.039387 |
| H | 4.477406  | 3.328866  | 0.557642  |
| C | -0.662954 | 4.667260  | 0.163315  |
| H | 3.036068  | 1.312894  | 0.824385  |
| C | 5.033897  | 0.544842  | 0.553019  |
| H | 5.521353  | 1.122960  | 1.353354  |
| H | 5.777642  | 0.461379  | -0.255566 |
| H | -0.371910 | 5.160003  | 1.101651  |
| H | -1.358123 | 5.352135  | -0.343336 |
| H | 3.379966  | 0.822863  | -0.828057 |

Sum of electronic and zero-point Energies= -1201.612652

Sum of electronic and thermal Energies= -1201.583696

Sum of electronic and thermal Enthalpies= -1201.582752

Sum of electronic and thermal Free Energies= -1201.673462

## daec[n=8]-1-E2 (benzene)

|   |           |           |           |
|---|-----------|-----------|-----------|
| C | -0.200296 | 3.008074  | 0.908129  |
| H | 0.521196  | 3.008836  | 1.720015  |
| C | 0.065993  | 3.777731  | -0.238063 |
| C | -0.877802 | 3.792268  | -1.271364 |
| H | -0.697219 | 4.390027  | -2.162935 |
| C | -2.061437 | 3.055623  | -1.162531 |
| H | -2.810975 | 3.075663  | -1.950477 |
| C | -2.317553 | 2.295704  | -0.026716 |
| O | -3.542740 | 1.672554  | 0.120673  |
| C | -1.379785 | 2.262603  | 1.027603  |
| O | -1.717332 | 1.501062  | 2.100350  |
| C | -0.801196 | 1.419450  | 3.183307  |
| H | -0.633778 | 2.402337  | 3.646965  |
| H | 0.163077  | 0.996015  | 2.866790  |
| H | -1.265021 | 0.751342  | 3.914649  |
| C | -4.128631 | -2.408926 | -0.459514 |
| H | -4.318542 | -3.469042 | -0.620149 |
| C | -2.907733 | -1.853094 | -0.866936 |
| C | -1.839911 | -2.720978 | -1.503165 |
| H | -1.195682 | -2.101694 | -2.143502 |
| H | -2.316694 | -3.459692 | -2.163974 |
| C | -0.958034 | -3.467265 | -0.479435 |
| H | -0.483205 | -2.729393 | 0.182601  |
| C | 0.105855  | -4.346775 | -1.152551 |
| H | 0.747565  | -3.716308 | -1.786133 |
| H | -0.396061 | -5.044262 | -1.840903 |
| C | 0.976534  | -5.170292 | -0.184749 |
| H | 1.654491  | -5.800067 | -0.781536 |
| C | 1.811793  | -4.364828 | 0.828133  |
| H | 2.368917  | -5.075436 | 1.458166  |
| H | 1.143162  | -3.821634 | 1.512986  |
| H | 0.329125  | -5.866081 | 0.371127  |
| H | -1.598183 | -4.088044 | 0.165797  |
| C | -2.682150 | -0.482791 | -0.663427 |
| H | -1.745781 | -0.033902 | -0.986083 |
| C | -3.663885 | 0.312159  | -0.064736 |
| C | -4.880691 | -0.246891 | 0.341238  |
| H | -5.628946 | 0.394125  | 0.800438  |
| C | -5.104161 | -1.607820 | 0.140640  |
| H | -6.051449 | -2.045610 | 0.450757  |
| C | 3.902897  | -0.384982 | 0.013357  |
| C | 2.799243  | -3.370210 | 0.199936  |
| H | 3.451485  | -3.899399 | -0.513908 |
| H | 2.241984  | -2.629965 | -0.389915 |
| C | 4.178635  | 1.909506  | -1.147630 |
| H | 4.950745  | 2.638323  | -1.439106 |
| H | 3.757105  | 1.522337  | -2.088976 |
| C | 3.667490  | -2.646456 | 1.240563  |
| H | 4.260134  | -3.392864 | 1.791611  |
| H | 3.011688  | -2.171087 | 1.987995  |
| C | 3.074159  | 2.635176  | -0.363994 |
| H | 3.478484  | 2.973243  | 0.604540  |
| H | 2.264683  | 1.931434  | -0.129070 |
| C | 2.490838  | 3.840910  | -1.112412 |
| H | 2.119049  | 3.519255  | -2.097055 |
| H | 3.293895  | 4.567380  | -1.308983 |
| C | 4.852598  | 0.755611  | -0.383149 |
| H | 5.662682  | 0.346925  | -1.006799 |
| H | 5.339333  | 1.153238  | 0.521864  |
| C | 1.353775  | 4.571026  | -0.358560 |
| H | 3.141890  | -0.006600 | 0.712428  |
| C | 4.616714  | -1.580607 | 0.663826  |
| H | 5.260586  | -1.209969 | 1.476561  |
| H | 5.294112  | -2.046532 | -0.069469 |
| H | 1.711641  | 4.849223  | 0.643282  |

H 1.140923 5.512449 -0.883687  
H 3.354609 -0.717045 -0.880898  
Sum of electronic and zero-point Energies= -1201.612304  
Sum of electronic and thermal Energies= -1201.583321  
Sum of electronic and thermal Enthalpies= -1201.582377  
Sum of electronic and thermal Free Energies= -1201.673478

daec[n=8]-2-TS (benzene)

C -1.911653 -3.341482 -0.353817  
H -2.301790 -4.298702 -0.689935  
C -0.543876 -3.063448 -0.542949  
C -0.062958 -1.830306 -0.106504  
H 0.983135 -1.571532 -0.218760  
C -0.913199 -0.896776 0.492663  
H -0.502030 0.046394 0.830254  
C -2.267701 -1.158148 0.648976  
O -3.151367 -0.267845 1.242183  
C -2.779436 -2.408043 0.225667  
O -4.113643 -2.600783 0.411908  
C -4.672371 -3.842470 0.010966  
H -4.561222 -4.009236 -1.070696  
H -5.736818 -3.783155 0.257050  
H -4.223128 -4.685433 0.556209  
C -3.537556 3.559553 -0.391902  
H -3.647229 4.545924 -0.840171  
C -2.357453 3.232089 0.292281  
C -1.155785 4.155910 0.320692  
H -0.469473 3.817420 1.108218  
H -1.452345 5.180084 0.587368  
C -0.410479 4.178683 -1.043635  
H -0.558755 3.214746 -1.550411  
C 1.103977 4.447601 -0.945737  
H 1.297141 5.266507 -0.234789  
H 1.464221 4.804021 -1.922608  
C 1.920747 3.203712 -0.552535  
H 1.583088 2.830569 0.425567  
C 3.437831 3.448184 -0.521667  
H 3.734340 3.933503 -1.464538  
H 3.675773 4.169143 0.276794  
H 1.702060 2.401302 -1.275556  
H -0.882098 4.931831 -1.689929  
C -2.255623 1.962591 0.876633  
H -1.377575 1.718838 1.466239  
C -3.262361 1.008950 0.705102  
C -4.433812 1.338874 0.020243  
H -5.211244 0.587768 -0.091527  
C -4.570378 2.624689 -0.509966  
H -5.483887 2.892050 -1.038226  
C 5.151721 -0.876234 0.434487  
C 4.299759 2.184215 -0.334860  
H 4.101562 1.488017 -1.164458  
H 5.358499 2.472434 -0.429234  
C 3.974106 -3.132567 -0.008575  
H 4.668753 -3.639367 0.677897  
H 4.450048 -3.172723 -1.001433  
C 4.103756 1.468213 1.011632  
H 3.094011 1.036582 1.065152  
H 4.149460 2.220233 1.815254  
C 2.636023 -3.902434 -0.042438  
H 2.024128 -3.588688 0.815584  
H 2.824339 -4.976151 0.103796  
C 1.838645 -3.729083 -1.351830  
H 2.291989 -4.369179 -2.122105  
H 1.941378 -2.702695 -1.731237  
C 3.833364 -1.669710 0.450099  
H 3.089965 -1.152254 -0.173090  
H 3.422657 -1.670569 1.472359  
C 0.343727 -4.084803 -1.245934  
H 5.964744 -1.530093 0.786532  
C 5.150122 0.381424 1.326448

H 6.151625 0.838062 1.290447  
H 5.004426 0.057715 2.368861  
H -0.053502 -4.237242 -2.261485  
H 0.238381 -5.060470 -0.745572  
H 5.410618 -0.611730 -0.601783  
Sum of electronic and zero-point Energies= -1201.591987  
Sum of electronic and thermal Energies= -1201.563932  
Sum of electronic and thermal Enthalpies= -1201.562988  
Sum of electronic and thermal Free Energies= -1201.650950

daec[n=8]-2-E1 (benzene)

C 0.875949 -2.693847 1.213424  
H 0.591220 -2.698949 2.262070  
C 0.074247 -3.390133 0.290320  
C 0.459708 -3.404478 -1.054005  
H -0.129694 -3.955188 -1.783992  
C 1.605957 -2.716545 -1.470429  
H 1.914351 -2.718504 -2.513363  
C 2.388691 -2.024467 -0.554101  
O 3.563699 -1.433311 -0.979236  
C 2.035433 -2.022300 0.814223  
O 2.877213 -1.355889 1.646171  
C 2.553881 -1.296973 3.028452  
H 1.588815 -0.797735 3.197427  
H 3.349843 -0.709068 3.494306  
H 2.531204 -2.298556 3.481531  
C 4.125381 2.696817 -0.932325  
H 4.298430 3.771774 -0.930137  
C 2.826678 2.201300 -0.761818  
C 1.643495 3.119791 -0.531430  
H 0.783671 2.736325 -1.096919  
H 1.859708 4.119392 -0.933720  
C 1.260361 3.248430 0.961469  
H 1.248396 2.246653 1.416347  
C -0.100128 3.927060 1.206623  
H -0.145863 4.876871 0.650273  
H -0.176950 4.195479 2.271327  
C -1.300522 3.046362 0.826288  
H -1.215478 2.751772 -0.228052  
C -2.666223 3.709839 1.058327  
H -2.741994 4.015309 2.113377  
H -2.725283 4.638586 0.468441  
H -1.252922 2.110298 1.406607  
H 2.054178 3.805815 1.479272  
C 2.621859 0.812942 -0.774500  
H 1.616639 0.415359 -0.658008  
C 3.697816 -0.060876 -0.935250  
C 4.994597 0.436359 -1.109749  
H 5.816804 -0.262544 -1.241235  
C 5.197751 1.815232 -1.109360  
H 6.204278 2.206630 -1.246750  
C -5.304004 0.213924 -0.560891  
C -3.868813 2.811480 0.710633  
H -3.814069 1.892052 1.313633  
H -4.794681 3.321379 1.019448  
C -4.381975 -2.180061 -0.590594  
H -5.080585 -2.507826 -1.374688  
H -4.919442 -2.314248 0.361843  
C -3.972032 2.455433 -0.780885  
H -3.067651 1.919901 -1.100103  
H -3.986563 3.390212 -1.363260  
C -3.134222 -3.087646 -0.600201  
H -2.414790 -2.713206 -1.343665  
H -3.418754 -4.097224 -0.933466  
C -2.456514 -3.215295 0.772961  
H -3.180907 -3.660066 1.471733  
H -2.214485 -2.220334 1.174953  
C -4.082043 -0.687565 -0.809858  
H -3.250318 -0.374312 -0.161748  
H -3.725441 -0.551947 -1.843339

|                                                           |           |           |           |
|-----------------------------------------------------------|-----------|-----------|-----------|
| C                                                         | -1.178361 | -4.091568 | 0.779416  |
| H                                                         | -6.197700 | -0.272238 | -0.982227 |
| C                                                         | -5.207421 | 1.625302  | -1.171652 |
| H                                                         | -6.118182 | 2.185787  | -0.908733 |
| H                                                         | -5.218985 | 1.528030  | -2.268437 |
| H                                                         | -1.003471 | -4.441503 | 1.806128  |
| H                                                         | -1.361225 | -4.991557 | 0.174847  |
| H                                                         | -5.486664 | 0.279864  | 0.522268  |
| Sum of electronic and zero-point Energies= -1201.607355   |           |           |           |
| Sum of electronic and thermal Energies= -1201.578455      |           |           |           |
| Sum of electronic and thermal Enthalpies= -1201.577511    |           |           |           |
| Sum of electronic and thermal Free Energies= -1201.668016 |           |           |           |

daec[n=8]-2-E2 (benzene)

|   |           |           |           |
|---|-----------|-----------|-----------|
| C | 0.818045  | -3.268841 | 0.006735  |
| H | 0.331151  | -3.988612 | -0.644526 |
| C | 0.294834  | -3.052320 | 1.292514  |
| C | 0.944303  | -2.142630 | 2.136089  |
| H | 0.566363  | -1.972632 | 3.142631  |
| C | 2.085075  | -1.461890 | 1.705250  |
| H | 2.600718  | -0.765889 | 2.363061  |
| C | 2.585632  | -1.665940 | 0.422516  |
| O | 3.751409  | -1.054854 | -0.001288 |
| C | 1.951889  | -2.578801 | -0.445720 |
| O | 2.509643  | -2.721152 | -1.676310 |
| C | 1.911858  | -3.637931 | -2.581673 |
| H | 1.931624  | -4.665801 | -2.191181 |
| H | 2.513760  | -3.589241 | -3.493825 |
| H | 0.874884  | -3.357935 | -2.818444 |
| C | 4.041812  | 3.074502  | -0.493457 |
| H | 4.145861  | 4.150132  | -0.626082 |
| C | 2.765781  | 2.506119  | -0.395507 |
| C | 1.507843  | 3.350534  | -0.431663 |
| H | 0.747103  | 2.824443  | -1.023841 |
| H | 1.706323  | 4.298178  | -0.951560 |
| C | 0.942619  | 3.655226  | 0.975477  |
| H | 0.943518  | 2.730492  | 1.571507  |
| C | -0.480611 | 4.243501  | 0.966674  |
| H | -0.525884 | 5.093426  | 0.267118  |
| H | -0.700623 | 4.657917  | 1.962247  |
| C | -1.563408 | 3.215327  | 0.603834  |
| H | -1.330660 | 2.772160  | -0.373574 |
| C | -2.989067 | 3.786112  | 0.574989  |
| H | -3.212561 | 4.242363  | 1.551706  |
| H | -3.039575 | 4.604411  | -0.161145 |
| H | -1.523061 | 2.386322  | 1.329118  |
| H | 1.629230  | 4.345405  | 1.486476  |
| C | 2.650608  | 1.116873  | -0.229654 |
| H | 1.665061  | 0.663721  | -0.163100 |
| C | 3.791017  | 0.314665  | -0.149725 |
| C | 5.065811  | 0.885762  | -0.252172 |
| H | 5.940108  | 0.242192  | -0.195873 |
| C | 5.180539  | 2.263679  | -0.426591 |
| H | 6.169779  | 2.710539  | -0.509165 |
| C | -5.172909 | -0.130106 | -0.727609 |
| C | -4.076722 | 2.744214  | 0.249917  |
| H | -4.033955 | 1.938167  | 0.998470  |
| H | -5.065762 | 3.214004  | 0.366925  |
| C | -4.098182 | -2.410521 | -0.248566 |
| H | -4.673503 | -2.921308 | -1.035011 |
| H | -4.736006 | -2.433353 | 0.649484  |
| C | -3.972000 | 2.152892  | -1.164806 |
| H | -3.002148 | 1.652245  | -1.288601 |
| H | -3.975295 | 2.980994  | -1.891059 |
| C | -2.799941 | -3.195422 | 0.033141  |
| H | -2.025895 | -2.890432 | -0.687030 |
| H | -2.975075 | -4.267751 | -0.142765 |
| C | -2.281115 | -3.027681 | 1.469720  |
| H | -3.049835 | -3.411283 | 2.157279  |
| H | -2.159066 | -1.961517 | 1.710785  |

|                                                           |           |           |           |
|-----------------------------------------------------------|-----------|-----------|-----------|
| C                                                         | -3.873789 | -0.953588 | -0.687500 |
| H                                                         | -3.147272 | -0.469787 | -0.018265 |
| H                                                         | -3.406899 | -0.957984 | -1.685435 |
| C                                                         | -0.953804 | -3.769631 | 1.768494  |
| H                                                         | -5.975011 | -0.749479 | -1.158432 |
| C                                                         | -5.093153 | 1.171302  | -1.548861 |
| H                                                         | -6.063769 | 1.687629  | -1.485347 |
| H                                                         | -4.962702 | 0.903191  | -2.608920 |
| H                                                         | -0.875954 | -3.912548 | 2.854781  |
| H                                                         | -1.000977 | -4.776448 | 1.328455  |
| H                                                         | -5.490196 | 0.089680  | 0.302854  |
| Sum of electronic and zero-point Energies= -1201.606691   |           |           |           |
| Sum of electronic and thermal Energies= -1201.577689      |           |           |           |
| Sum of electronic and thermal Enthalpies= -1201.576745    |           |           |           |
| Sum of electronic and thermal Free Energies= -1201.668586 |           |           |           |

daec[n=8]-3-TS (benzene)

|   |           |           |           |
|---|-----------|-----------|-----------|
| C | -2.477861 | -3.149240 | 0.786607  |
| H | -2.983241 | -4.096863 | 0.967853  |
| C | -1.075296 | -3.088800 | 0.723339  |
| C | -0.505016 | -1.830791 | 0.508613  |
| H | 0.572538  | -1.708401 | 0.480214  |
| C | -1.290841 | -0.691257 | 0.319686  |
| H | -0.805246 | 0.258827  | 0.127892  |
| C | -2.681232 | -0.768155 | 0.375270  |
| O | -3.526300 | 0.315987  | 0.213409  |
| C | -3.282279 | -2.019063 | 0.632677  |
| O | -4.641052 | -2.150643 | 0.789027  |
| C | -5.419313 | -2.023246 | -0.402107 |
| H | -6.453782 | -2.239334 | -0.114719 |
| H | -5.097219 | -2.749432 | -1.163654 |
| H | -5.363974 | -1.009283 | -0.816044 |
| C | -2.022993 | 3.684446  | -1.713604 |
| H | -1.612903 | 4.547166  | -2.237236 |
| C | -1.630616 | 3.438947  | -0.384748 |
| C | -0.604239 | 4.373864  | 0.245836  |
| H | -1.068953 | 5.364536  | 0.360961  |
| H | 0.183487  | 4.524747  | -0.506690 |
| C | 0.058316  | 3.971802  | 1.588882  |
| H | -0.313344 | 4.630979  | 2.384105  |
| C | 1.599530  | 4.030478  | 1.557086  |
| H | 1.978281  | 4.142743  | 2.583939  |
| H | 1.923493  | 4.934019  | 1.016859  |
| C | 2.256775  | 2.782821  | 0.939144  |
| H | 1.803165  | 2.561338  | -0.038634 |
| C | 3.784283  | 2.917303  | 0.793541  |
| H | 4.170125  | 3.477783  | 1.659353  |
| H | 4.014029  | 3.535742  | -0.088254 |
| H | 2.023858  | 1.919584  | 1.583201  |
| H | -0.232887 | 2.957425  | 1.888353  |
| C | -2.181189 | 2.329931  | 0.268287  |
| H | -1.940089 | 2.107383  | 1.303111  |
| C | -3.027532 | 1.451169  | -0.418051 |
| C | -3.409076 | 1.698234  | -1.734290 |
| H | -4.071498 | 1.004206  | -2.244917 |
| C | -2.912086 | 2.838344  | -2.373359 |
| H | -3.201957 | 3.049629  | -3.400884 |
| C | 4.963094  | -1.566456 | -1.634000 |
| C | 4.564320  | 1.592337  | 0.717967  |
| H | 4.389019  | 1.028692  | 1.648613  |
| H | 5.640114  | 1.827606  | 0.710658  |
| C | 3.213522  | -3.039991 | -0.409772 |
| H | 4.015608  | -3.743932 | -0.136488 |
| H | 3.146987  | -2.327093 | 0.425452  |
| C | 4.259031  | 0.673991  | -0.477630 |
| H | 4.389375  | 1.232472  | -1.418670 |
| H | 3.204060  | 0.364735  | -0.449278 |
| C | 1.871206  | -3.786731 | -0.520752 |
| H | 1.990448  | -4.683279 | -1.147320 |
| H | 1.158956  | -3.147334 | -1.058219 |

|   |           |           |           |
|---|-----------|-----------|-----------|
| C | 1.277894  | -4.185648 | 0.849408  |
| H | 1.552253  | -3.431794 | 1.602055  |
| H | 1.742065  | -5.122003 | 1.189741  |
| C | 3.596076  | -2.275860 | -1.686855 |
| H | 3.601562  | -2.971382 | -2.540294 |
| H | 2.805171  | -1.542602 | -1.906974 |
| C | -0.251101 | -4.363472 | 0.870600  |
| H | 5.752430  | -2.331186 | -1.565126 |
| C | 5.174488  | -0.563263 | -0.483529 |
| H | 5.074988  | -1.084388 | 0.480484  |
| H | 6.219477  | -0.218660 | -0.522836 |
| H | -0.545979 | -5.067202 | 0.075582  |
| H | -0.535350 | -4.856641 | 1.812438  |
| H | 5.126552  | -1.051718 | -2.593586 |

Sum of electronic and zero-point Energies= -1201.587991

Sum of electronic and thermal Energies= -1201.559548

Sum of electronic and thermal Enthalpies= -1201.558604

Sum of electronic and thermal Free Energies= -1201.648784

daec[n=8]-3-E1 (benzene)

|   |           |           |           |
|---|-----------|-----------|-----------|
| C | -3.892982 | -0.388377 | -0.036225 |
| H | -4.671867 | -0.127826 | 0.677731  |
| C | -3.612348 | 0.448572  | -1.122195 |
| C | -2.610196 | 0.049973  | -2.021610 |
| H | -2.386471 | 0.662872  | -2.892967 |
| C | -1.862062 | -1.102125 | -1.787916 |
| H | -1.058559 | -1.393737 | -2.460538 |
| C | -2.104044 | -1.888944 | -0.659873 |
| O | -1.295478 | -2.995263 | -0.416988 |
| C | -3.160570 | -1.557482 | 0.203598  |
| O | -3.445533 | -2.274504 | 1.339530  |
| C | -3.838098 | -3.638218 | 1.139957  |
| H | -4.071227 | -4.032558 | 2.134176  |
| H | -3.034451 | -4.229806 | 0.687911  |
| H | -4.736729 | -3.692955 | 0.508428  |
| C | 2.287377  | -2.349197 | 1.626074  |
| H | 3.223481  | -2.200626 | 2.161813  |
| C | 2.309731  | -2.896896 | 0.335741  |
| C | 3.611392  | -3.278702 | -0.339955 |
| H | 3.484306  | -4.267610 | -0.804037 |
| H | 4.395285  | -3.396105 | 0.421625  |
| C | 4.128834  | -2.312876 | -1.434409 |
| H | 4.919230  | -2.853307 | -1.975123 |
| C | 4.715283  | -0.967628 | -0.953072 |
| H | 5.485328  | -0.658281 | -1.676309 |
| H | 5.252572  | -1.124429 | -0.004056 |
| C | 3.732363  | 0.207713  | -0.800629 |
| H | 2.958475  | -0.030775 | -0.059589 |
| C | 4.462902  | 1.507319  | -0.418164 |
| H | 5.336107  | 1.616440  | -1.080673 |
| H | 4.872382  | 1.409225  | 0.600108  |
| H | 3.207345  | 0.356218  | -1.758076 |
| H | 3.332058  | -2.130702 | -2.171151 |
| C | 1.088174  | -3.092348 | -0.328423 |
| H | 1.061716  | -3.525177 | -1.326728 |
| C | -0.114814 | -2.739891 | 0.281412  |
| C | -0.135228 | -2.195044 | 1.569506  |
| H | -1.083665 | -1.952262 | 2.039109  |
| C | 1.076749  | -2.001192 | 2.233151  |
| H | 1.075313  | -1.585215 | 2.339065  |
| C | 0.795348  | 4.661967  | 1.512576  |
| C | 3.638529  | 2.803565  | -0.512600 |
| H | 3.211176  | 2.885511  | -1.525049 |
| H | 4.330461  | 3.654444  | -0.411596 |
| C | -1.328203 | 3.936709  | 0.211557  |
| H | -1.653575 | 4.983584  | 0.100747  |
| H | -0.713558 | 3.714607  | -0.673436 |
| C | 2.516474  | 2.972180  | 0.524888  |
| H | 2.932714  | 2.831891  | 1.535840  |
| H | 1.762425  | 2.183338  | 0.392917  |

|   |           |          |           |
|---|-----------|----------|-----------|
| C | -2.542871 | 2.996785 | 0.204298  |
| H | -3.232091 | 3.265142 | 1.020523  |
| H | -2.188742 | 1.981719 | 0.430567  |
| C | -3.302792 | 2.973175 | -1.131468 |
| H | -2.574804 | 2.913807 | -1.954203 |
| H | -3.847839 | 3.917816 | -1.275739 |
| C | -0.473480 | 3.790601 | 1.480283  |
| H | -1.090118 | 4.041418 | 2.357257  |
| H | -0.197967 | 2.732444 | 1.603561  |
| C | -4.296758 | 1.794121 | -1.272357 |
| H | 0.501284  | 5.719507 | 1.422672  |
| C | 1.857034  | 4.359763 | 0.437656  |
| H | 1.422840  | 4.491027 | -0.564975 |
| H | 2.646634  | 5.123097 | 0.518009  |
| H | -5.091287 | 1.886097 | -0.519200 |
| H | -4.786868 | 1.865082 | -2.254693 |
| H | 1.262321  | 4.563090 | 2.504943  |

Sum of electronic and zero-point Energies= -1201.599632

Sum of electronic and thermal Energies= -1201.570481

Sum of electronic and thermal Enthalpies= -1201.569537

Sum of electronic and thermal Free Energies= -1201.661026

daec[n=8]-3-E2 (benzene)

|   |           |           |           |
|---|-----------|-----------|-----------|
| C | 1.233120  | -2.759761 | -1.124783 |
| H | 0.867606  | -2.879529 | -2.143254 |
| C | 0.661012  | -3.486313 | -0.068380 |
| C | 1.184734  | -3.301834 | 1.218309  |
| H | 0.768566  | -3.860362 | 2.054718  |
| C | 2.234009  | -2.406560 | 1.445907  |
| H | 2.640306  | -2.259572 | 2.444046  |
| C | 2.781595  | -1.683290 | 0.388559  |
| O | 3.863385  | -0.850345 | 0.620214  |
| C | 2.283849  | -1.864435 | -0.915709 |
| O | 2.771235  | -1.143299 | -1.975615 |
| C | 4.084270  | -1.510292 | -2.413067 |
| H | 4.324384  | -0.843073 | -3.246911 |
| H | 4.100662  | -2.552499 | -2.765009 |
| H | 4.828066  | -1.382306 | -1.617370 |
| C | 3.486044  | 3.289363  | 0.928745  |
| H | 3.416765  | 4.371488  | 1.027372  |
| C | 2.316753  | 2.526167  | 0.805558  |
| C | 0.951868  | 3.183598  | 0.765628  |
| H | 0.921377  | 4.019886  | 1.479347  |
| H | 0.197695  | 2.460102  | 1.101398  |
| C | 0.572339  | 3.715620  | -0.634829 |
| H | 1.272924  | 4.518789  | -0.904850 |
| C | -0.874005 | 4.236350  | -0.730334 |
| H | -0.976535 | 4.839519  | -1.645119 |
| H | -1.073266 | 4.922177  | 0.108766  |
| C | -1.932017 | 3.122223  | -0.752194 |
| H | -1.794152 | 2.469058  | 0.120031  |
| C | -3.379242 | 3.637956  | -0.778667 |
| H | -3.483258 | 4.370396  | -1.594190 |
| H | -3.586660 | 4.189819  | 0.152078  |
| H | -1.758173 | 2.487579  | -1.636278 |
| H | 0.723178  | 2.918282  | -1.377811 |
| C | 2.423008  | 1.131650  | 0.691267  |
| H | 1.523483  | 0.528241  | 0.603361  |
| C | 3.677369  | 0.517309  | 0.695302  |
| C | 4.843268  | 1.281134  | 0.815889  |
| H | 5.807776  | 0.779539  | 0.825677  |
| C | 4.737517  | 2.666478  | 0.932625  |
| H | 5.641653  | 3.264424  | 1.032756  |
| C | -5.626671 | -0.669811 | 1.023611  |
| C | -4.438792 | 2.537021  | -0.970520 |
| H | -4.247449 | 2.021459  | -1.925464 |
| H | -5.428228 | 3.008335  | -1.075275 |
| C | -3.736312 | -2.231265 | 0.173232  |
| H | -4.481644 | -2.957947 | -0.188437 |
| H | -3.536263 | -1.557248 | -0.672895 |

|   |           |           |           |
|---|-----------|-----------|-----------|
| C | -4.496963 | 1.494989  | 0.157422  |
| H | -4.723588 | 1.999807  | 1.110824  |
| H | -3.504916 | 1.041456  | 0.283231  |
| C | -2.435265 | -2.963430 | 0.534329  |
| H | -2.621106 | -3.653818 | 1.372779  |
| H | -1.700722 | -2.231054 | 0.900898  |
| C | -1.834724 | -3.744711 | -0.642007 |
| H | -1.697118 | -3.067229 | -1.498377 |
| H | -2.550792 | -4.512444 | -0.971838 |
| C | -4.328013 | -1.434505 | 1.345658  |
| H | -4.531720 | -2.124929 | 2.178674  |
| H | -3.568852 | -0.732996 | 1.722428  |
| C | -0.489830 | -4.439807 | -0.329338 |
| H | -6.409177 | -1.394966 | 0.750970  |
| C | -5.530034 | 0.386666  | -0.094222 |
| H | -5.300504 | -0.105852 | -1.051140 |
| H | -6.523393 | 0.842679  | -0.226442 |
| H | -0.617909 | -5.101052 | 0.539152  |
| H | -0.232053 | -5.089897 | -1.178019 |
| H | -5.977252 | -0.180175 | 1.945433  |

Sum of electronic and zero-point Energies= -1201.609260

Sum of electronic and thermal Energies= -1201.580072

Sum of electronic and thermal Enthalpies= -1201.579128

Sum of electronic and thermal Free Energies= -1201.670837

daec[n=8]-4-TS (benzene)

|   |           |           |           |
|---|-----------|-----------|-----------|
| C | 1.048307  | -3.616058 | 0.086023  |
| H | 1.038573  | -4.666730 | 0.372268  |
| C | -0.151846 | -2.897492 | -0.041116 |
| C | -0.051212 | -1.551942 | -0.408972 |
| H | -0.939891 | -0.943089 | -0.532763 |
| C | 1.184650  | -0.940653 | -0.610259 |
| H | 1.210858  | 0.108864  | -0.872435 |
| C | 2.371036  | -1.650960 | -0.444684 |
| O | 3.628495  | -1.078517 | -0.600463 |
| C | 2.299122  | -3.018597 | -0.107031 |
| O | 3.424971  | -3.769344 | 0.122456  |
| C | 4.248205  | -4.017269 | -1.020280 |
| H | 3.683989  | -4.547116 | -1.802546 |
| H | 5.066044  | -4.656970 | -0.672151 |
| H | 4.661778  | -3.088997 | -1.431836 |
| C | 4.169421  | 2.664236  | 1.172262  |
| H | 4.273885  | 3.625112  | 1.673935  |
| C | 3.422921  | 2.578700  | -0.010583 |
| C | 2.593035  | 3.739799  | -0.523934 |
| H | 3.020473  | 4.697624  | -0.197009 |
| H | 2.590957  | 3.747787  | -1.623649 |
| C | 1.138839  | 3.606669  | -0.008753 |
| H | 0.788526  | 2.593657  | -0.247897 |
| C | 0.140802  | 4.635497  | -0.559068 |
| H | 0.130065  | 4.590610  | -1.659785 |
| H | 0.483756  | 5.648311  | -0.298656 |
| C | -1.292845 | 4.438620  | -0.019776 |
| H | -1.893261 | 5.327239  | -0.266212 |
| C | -2.019157 | 3.188904  | -0.549750 |
| H | -1.376375 | 2.304298  | -0.430614 |
| H | -2.183269 | 3.299872  | -1.633534 |
| H | -1.253998 | 4.396747  | 1.080439  |
| H | 1.150871  | 3.664306  | 1.090266  |
| C | 3.316966  | 1.331204  | -0.644736 |
| H | 2.790667  | 1.251662  | -1.592411 |
| C | 3.832866  | 0.182145  | -0.043144 |
| C | 4.576625  | 0.270968  | 1.135804  |
| H | 4.982484  | -0.635040 | 1.578339  |
| C | 4.762326  | 1.523617  | 1.724334  |
| H | 5.345574  | 1.605473  | 2.639586  |
| C | -6.168477 | 0.120124  | -0.199592 |
| C | -3.359599 | 2.904758  | 0.148933  |
| H | -3.173593 | 2.754547  | 1.224298  |
| H | -4.013628 | 3.788006  | 0.075823  |

|   |           |           |           |
|---|-----------|-----------|-----------|
| C | -5.082614 | -1.987806 | 0.868964  |
| H | -4.690768 | -1.286074 | 1.620655  |
| H | -6.001671 | -2.409297 | 1.302743  |
| C | -4.094262 | 1.675374  | -0.413986 |
| H | -4.402944 | 1.879149  | -1.451916 |
| H | -3.384170 | 0.837160  | -0.469835 |
| C | -4.040020 | -3.110788 | 0.676872  |
| H | -4.368420 | -3.798356 | -0.118544 |
| H | -3.983833 | -3.709393 | 1.598572  |
| C | -2.653396 | -2.542897 | 0.347325  |
| H | -2.387872 | -1.808488 | 1.123042  |
| H | -2.725179 | -1.979652 | -0.591368 |
| C | -5.447958 | -1.225304 | -0.420386 |
| H | -4.547674 | -1.047170 | -1.022591 |
| H | -6.090587 | -1.870997 | -1.037956 |
| C | -1.504343 | -3.554030 | 0.219030  |
| H | -6.559110 | 0.465900  | -1.169179 |
| C | -5.320812 | 1.255003  | 0.414221  |
| H | -4.988985 | 0.973033  | 1.424949  |
| H | -5.974946 | 2.130010  | 0.551132  |
| H | -1.730304 | -4.267248 | -0.589916 |
| H | -1.436696 | -4.159696 | 1.135322  |
| H | -7.050535 | -0.043088 | 0.439180  |

Sum of electronic and zero-point Energies= -1201.594648

Sum of electronic and thermal Energies= -1201.566275

Sum of electronic and thermal Enthalpies= -1201.565331

Sum of electronic and thermal Free Energies= -1201.653884

daec[n=8]-4-E1 (benzene)

|   |           |           |           |
|---|-----------|-----------|-----------|
| C | 0.377101  | -3.264213 | -0.559802 |
| H | -0.066799 | -3.848162 | -1.363749 |
| C | -0.351041 | -2.976565 | 0.595277  |
| C | 0.273761  | -2.215368 | 1.598472  |
| H | -0.260245 | -1.982361 | 2.518041  |
| C | 1.579783  | -1.768301 | 1.432577  |
| H | 2.073522  | -1.195544 | 2.214442  |
| C | 2.301233  | -2.060537 | 0.268287  |
| O | 3.637524  | -1.698115 | 0.172158  |
| C | 1.698115  | -2.820721 | -0.750598 |
| O | 2.284051  | -3.227044 | -1.911786 |
| C | 3.318269  | -2.452664 | -2.522031 |
| H | 3.071815  | -1.382585 | -2.529497 |
| H | 3.375204  | -2.812181 | -3.555152 |
| H | 4.284750  | -2.601546 | -2.030090 |
| C | 4.873426  | 2.260673  | 0.563041  |
| H | 5.222389  | 3.286572  | 0.667068  |
| C | 3.610389  | 2.013509  | 0.008394  |
| C | 2.729793  | 3.153727  | -0.471265 |
| H | 3.256521  | 4.105080  | -0.313451 |
| H | 2.583473  | 3.064501  | -1.559319 |
| C | 1.344450  | 3.214880  | 0.201383  |
| H | 0.824041  | 2.263391  | 0.029088  |
| C | 0.480960  | 4.381661  | -0.305931 |
| H | 0.491837  | 4.392518  | -1.407703 |
| H | 0.943393  | 5.328935  | 0.009813  |
| C | -0.981302 | 4.339186  | 0.179262  |
| H | -1.450468 | 5.317402  | -0.005167 |
| C | -1.822092 | 3.246014  | -0.497778 |
| H | -1.321586 | 2.272923  | -0.384864 |
| H | -1.857096 | 3.441732  | -1.581538 |
| H | -0.998896 | 4.195247  | 1.271351  |
| H | 1.470476  | 3.298730  | 1.291227  |
| C | 3.177647  | 0.682785  | -0.114132 |
| H | 2.203168  | 0.462576  | -0.542365 |
| C | 3.992602  | -0.368538 | 0.313828  |
| C | 5.256900  | -0.117108 | 0.857483  |
| H | 5.873053  | -0.953209 | 1.178378  |
| C | 5.689422  | 1.202677  | 0.976988  |
| H | 6.669569  | 1.408709  | 1.403142  |
| C | -6.162951 | 0.510452  | -0.669743 |

|                                                           |           |           |           |
|-----------------------------------------------------------|-----------|-----------|-----------|
| C                                                         | -3.253802 | 3.113024  | 0.041409  |
| H                                                         | -3.214670 | 2.937464  | 1.128336  |
| H                                                         | -3.797957 | 4.060906  | -0.094579 |
| C                                                         | -5.226299 | -1.451770 | 0.744530  |
| H                                                         | -4.844603 | -0.681231 | 1.430644  |
| H                                                         | -6.202513 | -1.757329 | 1.150724  |
| C                                                         | -4.022850 | 1.963830  | -0.628044 |
| H                                                         | -4.140006 | 2.177640  | -1.702738 |
| H                                                         | -3.400873 | 1.059266  | -0.568582 |
| C                                                         | -4.258917 | -2.650708 | 0.784996  |
| H                                                         | -4.559197 | -3.400254 | 0.035666  |
| H                                                         | -4.349575 | -3.146122 | 1.763871  |
| C                                                         | -2.789503 | -2.256376 | 0.568237  |
| H                                                         | -2.528210 | -1.455040 | 1.276074  |
| H                                                         | -2.651067 | -1.830855 | -0.435544 |
| C                                                         | -5.441462 | -0.851880 | -0.656266 |
| H                                                         | -4.477837 | -0.753016 | -1.173367 |
| H                                                         | -6.025990 | -1.565065 | -1.257352 |
| C                                                         | -1.792725 | -3.420058 | 0.749996  |
| H                                                         | -6.379466 | 0.777448  | -1.715712 |
| C                                                         | -5.399615 | 1.678201  | -0.010801 |
| H                                                         | -5.276593 | 1.484236  | 1.065265  |
| H                                                         | -6.023215 | 2.582825  | -0.079271 |
| H                                                         | -2.017657 | -4.213966 | 0.024564  |
| H                                                         | -1.937492 | -3.859232 | 1.748553  |
| H                                                         | -7.141565 | 0.405997  | -0.175805 |
| Sum of electronic and zero-point Energies= -1201.606951   |           |           |           |
| Sum of electronic and thermal Energies= -1201.577719      |           |           |           |
| Sum of electronic and thermal Enthalpies= -1201.576774    |           |           |           |
| Sum of electronic and thermal Free Energies= -1201.668807 |           |           |           |

daec[n=8]-4-E2 (benzene)

|   |           |           |           |
|---|-----------|-----------|-----------|
| C | 0.391618  | -2.642033 | 0.751109  |
| H | -0.048044 | -2.703236 | 1.745282  |
| C | -0.345226 | -3.023130 | -0.381519 |
| C | 0.278281  | -2.937074 | -1.633078 |
| H | -0.265565 | -3.234194 | -2.528243 |
| C | 1.591345  | -2.470371 | -1.752564 |
| H | 2.078184  | -2.404402 | -2.722923 |
| C | 2.305927  | -2.086059 | -0.619560 |
| O | 3.630510  | -1.705862 | -0.745060 |
| C | 1.703911  | -2.179404 | 0.650330  |
| O | 2.370313  | -1.784529 | 1.783101  |
| C | 3.377669  | -2.694045 | 2.236852  |
| H | 2.931060  | -3.654725 | 2.534006  |
| H | 3.842703  | -2.224853 | 3.109609  |
| H | 4.140215  | -2.871620 | 1.468279  |
| C | 4.901541  | 2.201106  | -0.059628 |
| H | 5.260777  | 3.213581  | 0.116192  |
| C | 3.568608  | 1.997668  | -0.440923 |
| C | 2.630237  | 3.174910  | -0.638644 |
| H | 3.174656  | 4.105069  | -0.423638 |
| H | 2.340375  | 3.232234  | -1.699931 |
| C | 1.346631  | 3.124991  | 0.212150  |
| H | 0.789692  | 2.211831  | -0.036676 |
| C | 0.449093  | 4.357691  | 0.011416  |
| H | 0.334964  | 4.556320  | -1.066464 |
| H | 0.959706  | 5.239036  | 0.427756  |
| C | -0.949439 | 4.227002  | 0.645585  |
| H | -1.415969 | 5.222133  | 0.701791  |
| C | -1.882329 | 3.280159  | -0.124421 |
| H | -1.386522 | 2.307997  | -0.263568 |
| H | -2.042477 | 3.682959  | -1.137454 |
| H | -0.847069 | 3.880069  | 1.686106  |
| H | 1.614612  | 3.035789  | 1.275338  |
| C | 3.122352  | 0.684013  | -0.661947 |
| H | 2.095748  | 0.498515  | -0.967076 |
| C | 3.994824  | -0.393187 | -0.498003 |
| C | 5.329050  | -0.184783 | -0.132579 |
| H | 5.992008  | -1.039837 | -0.026903 |

|                                                           |           |           |           |
|-----------------------------------------------------------|-----------|-----------|-----------|
| C                                                         | 5.773626  | 1.117582  | 0.085790  |
| H                                                         | 6.808821  | 1.289208  | 0.375399  |
| C                                                         | -6.245465 | 0.590161  | -0.322175 |
| C                                                         | -3.241854 | 3.032423  | 0.544774  |
| H                                                         | -3.077392 | 2.645724  | 1.563121  |
| H                                                         | -3.783783 | 3.983899  | 0.663647  |
| C                                                         | -5.172588 | -1.603810 | 0.552367  |
| H                                                         | -4.712589 | -0.982351 | 1.334790  |
| H                                                         | -6.098881 | -2.002653 | 0.992886  |
| C                                                         | -4.100640 | 2.031748  | -0.243035 |
| H                                                         | -4.341271 | 2.453781  | -1.232207 |
| H                                                         | -3.487820 | 1.140253  | -0.438811 |
| C                                                         | -4.213964 | -2.768455 | 0.237088  |
| H                                                         | -4.583938 | -3.331115 | -0.634806 |
| H                                                         | -4.222139 | -3.475517 | 1.080689  |
| C                                                         | -2.765138 | -2.318518 | -0.008868 |
| H                                                         | -2.422798 | -1.731323 | 0.856707  |
| H                                                         | -2.714252 | -1.641862 | -0.873619 |
| C                                                         | -5.540286 | -0.737066 | -0.664984 |
| H                                                         | -4.640776 | -0.523629 | -1.257752 |
| H                                                         | -6.196321 | -1.323167 | -1.326560 |
| C                                                         | -1.781910 | -3.485586 | -0.236907 |
| H                                                         | -6.579854 | 1.057547  | -1.261292 |
| C                                                         | -5.398199 | 1.612848  | 0.462888  |
| H                                                         | -5.151751 | 1.209991  | 1.456702  |
| H                                                         | -6.015430 | 2.505059  | 0.649543  |
| H                                                         | -2.081519 | -4.046396 | -1.133194 |
| H                                                         | -1.859225 | -4.185196 | 0.608680  |
| H                                                         | -7.160776 | 0.375538  | 0.251164  |
| Sum of electronic and zero-point Energies= -1201.607560   |           |           |           |
| Sum of electronic and thermal Energies= -1201.578239      |           |           |           |
| Sum of electronic and thermal Enthalpies= -1201.577294    |           |           |           |
| Sum of electronic and thermal Free Energies= -1201.669576 |           |           |           |

daec[n=8]-5-TS (benzene)

|   |           |           |           |
|---|-----------|-----------|-----------|
| C | -2.047365 | 3.405419  | -0.014507 |
| H | -2.297253 | 4.424713  | 0.275752  |
| C | -0.709596 | 3.009394  | -0.156453 |
| C | -0.485310 | 1.683248  | -0.539377 |
| H | 0.517629  | 1.306330  | -0.699164 |
| C | -1.537297 | 0.794270  | -0.725220 |
| H | -1.299568 | -0.220868 | -1.004885 |
| C | -2.865025 | 1.180856  | -0.552767 |
| O | -3.933150 | 0.303258  | -0.740331 |
| C | -3.126028 | 2.527496  | -0.211349 |
| O | -4.373811 | 3.077409  | -0.100133 |
| C | -5.376454 | 2.392399  | 0.652819  |
| H | -4.960834 | 1.970899  | 1.578843  |
| H | -5.853411 | 1.599598  | 0.067830  |
| H | -6.121848 | 3.152372  | 0.912859  |
| C | -3.377209 | -3.536859 | 0.822489  |
| H | -3.186732 | -4.502669 | 1.288059  |
| C | -2.634262 | -3.147470 | -0.299710 |
| C | -1.404614 | -3.908017 | -0.761045 |
| H | -1.263915 | -3.774561 | -1.843218 |
| H | -1.510622 | -4.986235 | -0.580007 |
| C | -0.164723 | -3.358706 | -0.005825 |
| H | -0.228554 | -2.260925 | -0.000854 |
| C | 1.212948  | -3.750021 | -0.561040 |
| H | 1.285441  | -3.431078 | -1.612951 |
| H | 1.332562  | -4.844518 | -0.562962 |
| C | 2.348921  | -3.102600 | 0.254627  |
| H | 2.323044  | -3.503425 | 1.280555  |
| C | 3.756453  | -3.305534 | -0.329266 |
| H | 3.818324  | -2.818046 | -1.314097 |
| H | 3.911249  | -4.379179 | -0.517729 |
| H | 2.142139  | -2.025851 | 0.349299  |
| H | -0.237205 | -3.660265 | 1.050006  |
| C | -2.916434 | -1.905487 | -0.889255 |
| H | -2.405027 | -1.622820 | -1.804443 |

|   |           |           |           |
|---|-----------|-----------|-----------|
| C | -3.786083 | -1.002725 | -0.272367 |
| C | -4.527419 | -1.397317 | 0.845035  |
| H | -5.223230 | -0.699873 | 1.303217  |
| C | -4.340894 | -2.680380 | 1.365152  |
| H | -4.920948 | -2.996658 | 2.230103  |
| C | 5.648372  | 1.033754  | -0.137221 |
| C | 4.901793  | -2.814081 | 0.582114  |
| H | 4.803774  | -3.319407 | 1.555458  |
| H | 5.858168  | -3.160086 | 0.160070  |
| C | 4.367283  | 3.281006  | 0.025535  |
| H | 5.224124  | 3.731751  | 0.548766  |
| H | 4.540472  | 3.458019  | -1.047849 |
| C | 4.998912  | -1.293256 | 0.829192  |
| H | 5.709528  | -1.125738 | 1.653766  |
| H | 4.032111  | -0.913101 | 1.188204  |
| C | 3.070002  | 4.015272  | 0.446488  |
| H | 3.102681  | 5.046243  | 0.063349  |
| H | 3.026996  | 4.095260  | 1.543908  |
| C | 1.819717  | 3.282144  | -0.053249 |
| H | 1.790376  | 2.318374  | 0.465904  |
| H | 1.945482  | 3.047497  | -1.121806 |
| C | 4.351241  | 1.758763  | 0.264858  |
| H | 4.116662  | 1.552825  | 1.320308  |
| H | 3.530212  | 1.318732  | -0.317664 |
| C | 0.453227  | 3.954980  | 0.143772  |
| H | 6.038445  | 1.486103  | -1.062153 |
| C | 5.466363  | -0.477828 | -0.388142 |
| H | 6.422002  | -0.893979 | -0.743647 |
| H | 4.753769  | -0.607885 | -1.217584 |
| H | 0.376921  | 4.855806  | -0.484092 |
| H | 0.360472  | 4.309619  | 1.182392  |
| H | 6.423149  | 1.195366  | 0.628451  |

Sum of electronic and zero-point Energies= -1201.585222

Sum of electronic and thermal Energies= -1201.556910

Sum of electronic and thermal Enthalpies= -1201.555966

Sum of electronic and thermal Free Energies= -1201.644283

daec[n=8]-5-E1 (benzene)

|   |           |           |           |
|---|-----------|-----------|-----------|
| C | 1.763202  | -3.018814 | -0.444676 |
| H | 1.561206  | -3.690941 | -1.276782 |
| C | 0.945419  | -3.022631 | 0.692685  |
| C | 1.262731  | -2.143093 | 1.739128  |
| H | 0.655802  | -2.138955 | 2.643097  |
| C | 2.336114  | -1.260080 | 1.630870  |
| H | 2.572694  | -0.567366 | 2.435410  |
| C | 3.112071  | -1.233748 | 0.470473  |
| O | 4.170625  | -0.345971 | 0.353718  |
| C | 2.841120  | -2.134480 | -0.573796 |
| O | 3.544875  | -2.127188 | -1.749587 |
| C | 4.923430  | -2.501576 | -1.658175 |
| H | 5.025395  | -3.519451 | -1.253201 |
| H | 5.494287  | -1.800934 | -1.038138 |
| H | 5.310060  | -2.481354 | -2.682251 |
| C | 3.449619  | 3.753750  | 0.122061  |
| H | 3.284181  | 4.828551  | 0.071289  |
| C | 2.439424  | 2.876859  | -0.294037 |
| C | 1.108903  | 3.387047  | -0.815981 |
| H | 0.933728  | 2.975675  | -1.822010 |
| H | 1.156254  | 4.478415  | -0.933904 |
| C | -0.091840 | 3.015960  | 0.078979  |
| H | -0.097548 | 1.927214  | 0.235518  |
| C | -1.444933 | 3.443267  | -0.508268 |
| H | -1.524024 | 3.063224  | -1.539374 |
| H | -1.487314 | 4.541088  | -0.586151 |
| C | -2.644797 | 2.931587  | 0.303685  |
| H | -2.596044 | 3.331519  | 1.329175  |
| C | -4.003253 | 3.287299  | -0.320104 |
| H | -4.024160 | 2.932104  | -1.361208 |
| H | -4.093072 | 4.382881  | -0.379814 |
| H | -2.555590 | 1.839683  | 0.401249  |

|   |           |           |           |
|---|-----------|-----------|-----------|
| H | 0.043916  | 3.464317  | 1.074657  |
| C | 2.672822  | 1.494485  | -0.220768 |
| H | 1.907693  | 0.797303  | -0.551531 |
| C | 3.884487  | 1.005920  | 0.271700  |
| C | 4.895329  | 1.883978  | 0.677597  |
| H | 5.832513  | 1.480267  | 1.052508  |
| C | 4.668987  | 3.257203  | 0.595748  |
| H | 5.449032  | 3.947444  | 0.911939  |
| C | -5.480623 | -1.067259 | -0.676989 |
| C | -5.229028 | 2.741797  | 0.440109  |
| H | -5.236966 | 3.171655  | 1.453808  |
| H | -6.139413 | 3.115894  | -0.053646 |
| C | -4.052733 | -3.186064 | -0.333348 |
| H | -4.976710 | -3.704038 | -0.033334 |
| H | -3.951303 | -3.351492 | -1.417674 |
| C | -5.320910 | 1.207387  | 0.560368  |
| H | -6.193193 | 0.958659  | 1.184932  |
| H | -4.446424 | 0.833871  | 1.110206  |
| C | -2.862045 | -3.840240 | 0.394602  |
| H | -2.805248 | -4.900278 | 0.102957  |
| H | -3.052012 | -3.833370 | 1.479773  |
| C | -1.513118 | -3.158341 | 0.125064  |
| H | -1.540648 | -2.130507 | 0.510444  |
| H | -1.346208 | -3.070410 | -0.959645 |
| C | -4.203763 | -1.678485 | -0.074360 |
| H | -4.176245 | -1.492443 | 1.009935  |
| H | -3.333476 | -1.152707 | -0.494104 |
| C | -0.303284 | -3.877895 | 0.762501  |
| H | -5.629889 | -1.477210 | -1.687925 |
| C | -5.445809 | 0.468988  | -0.781949 |
| H | -6.355757 | 0.815846  | -1.296220 |
| H | -4.605807 | 0.746158  | -1.436393 |
| H | -0.140736 | -4.841831 | 0.260057  |
| H | -0.532083 | -4.104733 | 1.813660  |
| H | -6.356017 | -1.385390 | -0.089087 |

Sum of electronic and zero-point Energies= -1201.607442

Sum of electronic and thermal Energies= -1201.578155

Sum of electronic and thermal Enthalpies= -1201.577210

Sum of electronic and thermal Free Energies= -1201.669539

daec[n=8]-5-E2 (benzene)

|   |           |           |           |
|---|-----------|-----------|-----------|
| C | 1.212074  | -2.552387 | 0.963818  |
| H | 0.703395  | -2.591672 | 1.925493  |
| C | 0.711891  | -3.262286 | -0.137918 |
| C | 1.419220  | -3.192907 | -1.346080 |
| H | 1.064549  | -3.747413 | -2.213379 |
| C | 2.561254  | -2.394929 | -1.462802 |
| H | 3.099428  | -2.317883 | -2.404849 |
| C | 3.021254  | -1.662328 | -0.369715 |
| O | 4.153848  | -0.875863 | -0.500119 |
| C | 2.358070  | -1.761484 | 0.867991  |
| O | 2.769070  | -1.045358 | 1.962687  |
| C | 3.996946  | -1.485118 | 2.552526  |
| H | 4.829071  | -1.443143 | 1.839253  |
| H | 3.898228  | -2.510954 | 2.937589  |
| H | 4.196140  | -0.803098 | 3.385074  |
| C | 3.863302  | 3.283888  | -0.435414 |
| H | 3.813606  | 4.371181  | -0.413475 |
| C | 2.710367  | 2.542825  | -0.724182 |
| C | 1.382942  | 3.220040  | -1.013074 |
| H | 1.034360  | 2.919006  | -2.013422 |
| H | 1.530039  | 4.308129  | -1.054857 |
| C | 0.276136  | 2.887277  | 0.008579  |
| H | 0.172584  | 1.794840  | 0.081218  |
| C | -1.087319 | 3.495177  | -0.352096 |
| H | -1.333960 | 3.230392  | -1.392880 |
| H | -1.024128 | 4.594499  | -0.326716 |
| C | -2.224099 | 3.016606  | 0.564097  |
| H | -2.005283 | 3.300068  | 1.605966  |
| C | -3.603982 | 3.562001  | 0.164537  |

|   |           |           |           |
|---|-----------|-----------|-----------|
| H | -3.787837 | 3.332407  | -0.895710 |
| H | -3.586443 | 4.660787  | 0.230013  |
| H | -2.240083 | 1.916958  | 0.548379  |
| H | 0.587736  | 3.227403  | 1.007334  |
| C | 2.796414  | 1.141710  | -0.748527 |
| H | 1.915613  | 0.549343  | -0.980700 |
| C | 4.005324  | 0.501389  | -0.473170 |
| C | 5.158594  | 1.244114  | -0.197538 |
| H | 6.093173  | 0.724884  | -0.000084 |
| C | 5.077131  | 2.635528  | -0.182002 |
| H | 5.969017  | 3.220713  | 0.035041  |
| C | -5.581103 | -0.557618 | -0.464740 |
| C | -4.778303 | 3.044098  | 1.019409  |
| H | -4.614620 | 3.345732  | 2.065630  |
| H | -5.697138 | 3.558291  | 0.697001  |
| C | -4.357866 | -2.824729 | -0.560570 |
| H | -5.292578 | -3.288591 | -0.209638 |
| H | -4.398520 | -2.857033 | -1.660952 |
| C | -5.019480 | 1.521615  | 0.982232  |
| H | -5.827479 | 1.279521  | 1.690291  |
| H | -4.127963 | 1.003613  | 1.360945  |
| C | -3.170685 | -3.676386 | -0.069682 |
| H | -3.260652 | -4.689357 | -0.491342 |
| H | -3.237191 | -3.795270 | 1.023506  |
| C | -1.794213 | -3.092486 | -0.418821 |
| H | -1.668231 | -2.127534 | 0.089738  |
| H | -1.739299 | -2.876216 | -1.497047 |
| C | -4.314485 | -1.355785 | -0.109817 |
| H | -4.138629 | -1.314459 | 0.975669  |
| H | -3.448688 | -0.862286 | -0.575555 |
| C | -0.606613 | -4.000586 | -0.027539 |
| H | -5.896512 | -0.823599 | -1.485622 |
| C | -5.392417 | 0.969726  | -0.403063 |
| H | -6.316435 | 1.461223  | -0.745744 |
| H | -4.616112 | 1.245845  | -1.132323 |
| H | -0.600900 | -4.896016 | -0.664946 |
| H | -0.746242 | -4.349640 | 1.005531  |
| H | -6.407500 | -0.862680 | 0.196396  |

Sum of electronic and zero-point Energies= -1201.607522

Sum of electronic and thermal Energies= -1201.578331

Sum of electronic and thermal Enthalpies= -1201.577387

Sum of electronic and thermal Free Energies= -1201.668688

daec[n=8]-6-TS (benzene)

|   |           |           |           |
|---|-----------|-----------|-----------|
| C | 0.410909  | -3.422505 | -0.347846 |
| H | 0.765400  | -4.308029 | -0.872836 |
| C | 1.316683  | -2.453829 | 0.110141  |
| C | 0.785527  | -1.346582 | 0.783369  |
| H | 1.435469  | -0.572594 | 1.178764  |
| C | -0.587562 | -1.197254 | 0.964460  |
| H | -0.960847 | -0.325562 | 1.488489  |
| C | -1.481167 | -2.140513 | 0.460191  |
| O | -2.858345 | -2.010282 | 0.594876  |
| C | -0.973001 | -3.280177 | -0.191496 |
| O | -1.796514 | -4.227555 | -0.746231 |
| C | -2.551613 | -5.010979 | 0.182540  |
| H | -1.885144 | -5.554239 | 0.869198  |
| H | -3.115016 | -5.733463 | -0.417340 |
| H | -3.249286 | -4.393363 | 0.760281  |
| C | -4.604066 | 1.496235  | -0.856042 |
| H | -5.053874 | 2.402623  | -1.257148 |
| C | -3.922441 | 1.538400  | 0.370896  |
| C | -3.742049 | 2.828547  | 1.152667  |
| H | -3.103156 | 2.623538  | 2.021747  |
| H | -4.711292 | 3.152427  | 1.562521  |
| C | -3.156773 | 4.011273  | 0.345217  |
| H | -3.023038 | 4.854519  | 1.039735  |
| C | -1.841767 | 3.758891  | -0.414914 |
| H | -1.631794 | 4.659058  | -1.013256 |
| H | -1.993164 | 2.947397  | -1.141320 |

|   |           |           |           |
|---|-----------|-----------|-----------|
| C | -0.594304 | 3.442568  | 0.429310  |
| H | -0.471708 | 4.205779  | 1.214567  |
| C | 0.671128  | 3.394717  | -0.444660 |
| H | 0.788543  | 4.372766  | -0.938439 |
| H | 0.513971  | 2.668315  | -1.257512 |
| H | -0.722183 | 2.481386  | 0.949291  |
| H | -3.908091 | 4.345214  | -0.385197 |
| C | -3.375844 | 0.346829  | 0.865761  |
| H | -2.894366 | 0.342000  | 1.839611  |
| C | -3.437299 | -0.834185 | 0.121396  |
| C | -4.108270 | -0.868865 | -1.100757 |
| H | -4.145187 | -1.798617 | -1.662367 |
| C | -4.705028 | 0.302567  | -1.575173 |
| H | -5.237518 | 0.286788  | -2.524325 |
| C | 4.911778  | 1.413301  | 0.280832  |
| C | 1.985171  | 3.050091  | 0.277759  |
| H | 2.125762  | 3.723740  | 1.138176  |
| H | 1.921094  | 2.032277  | 0.691966  |
| C | 5.468175  | -0.914403 | -0.784594 |
| H | 5.226310  | -1.500145 | -1.683750 |
| H | 6.552274  | -0.730308 | -0.837458 |
| C | 3.193394  | 3.172791  | -0.667982 |
| H | 3.209930  | 4.201744  | -1.059467 |
| H | 3.029257  | 2.529435  | -1.545179 |
| C | 5.199646  | -1.772191 | 0.471146  |
| H | 5.727822  | -1.329969 | 1.328691  |
| H | 5.658918  | -2.760587 | 0.316068  |
| C | 3.725592  | -1.935796 | 0.876751  |
| H | 3.670672  | -2.525631 | 1.803478  |
| H | 3.346396  | -0.941983 | 1.137090  |
| C | 4.729552  | 0.436257  | -0.895461 |
| H | 5.082997  | 0.924059  | -1.817463 |
| H | 3.657080  | 0.254706  | -1.054217 |
| C | 2.807059  | -2.575899 | -0.179523 |
| H | 4.307834  | 1.085529  | 1.139105  |
| C | 4.582993  | 2.880746  | -0.067660 |
| H | 5.336106  | 3.229402  | -0.791471 |
| H | 4.723891  | 3.499477  | 0.832322  |
| H | 2.999382  | -2.109030 | -1.157720 |
| H | 3.069167  | -3.636240 | -0.305472 |
| H | 5.957707  | 1.380076  | 0.623703  |

Sum of electronic and zero-point Energies= -1201.590392

Sum of electronic and thermal Energies= -1201.562236

Sum of electronic and thermal Enthalpies= -1201.561292

Sum of electronic and thermal Free Energies= -1201.649120

daec[n=8]-6-E1 (benzene)

|   |           |           |           |
|---|-----------|-----------|-----------|
| C | 0.592049  | 1.909931  | 0.801443  |
| H | 1.243596  | 1.409565  | 1.515641  |
| C | 1.130596  | 2.676120  | -0.242780 |
| C | 0.243273  | 3.314277  | -1.120471 |
| H | 0.632531  | 3.926489  | -1.932283 |
| C | -1.138136 | 3.162734  | -0.977324 |
| H | -1.831278 | 3.646726  | -1.661606 |
| C | -1.657391 | 2.376924  | 0.050735  |
| O | -3.030118 | 2.280682  | 0.197735  |
| C | -0.785979 | 1.754049  | 0.963318  |
| O | -1.253206 | 0.946895  | 1.969701  |
| C | -1.914603 | 1.627777  | 3.041907  |
| H | -1.223097 | 2.315323  | 3.551018  |
| H | -2.236017 | 0.851317  | 3.743070  |
| H | -2.790098 | 2.186709  | 2.689770  |
| C | -5.122994 | -1.222811 | -0.644114 |
| H | -5.697859 | -2.121436 | -0.862403 |
| C | -3.775676 | -1.149245 | -1.029854 |
| C | -3.108944 | -2.323649 | -1.720862 |
| H | -2.207291 | -1.980391 | -2.244894 |
| H | -3.785921 | -2.712430 | -2.495115 |
| C | -2.750499 | -3.492244 | -0.770656 |
| H | -2.461908 | -4.358851 | -1.385247 |



|                                                           |           |           |           |
|-----------------------------------------------------------|-----------|-----------|-----------|
| C                                                         | -1.634670 | -3.207643 | 0.250326  |
| H                                                         | -1.624721 | -4.028362 | 0.983984  |
| H                                                         | -1.873832 | -2.296746 | 0.818352  |
| C                                                         | -0.228241 | -3.080378 | -0.356482 |
| H                                                         | -0.011199 | -3.978907 | -0.956747 |
| C                                                         | 0.872360  | -2.900810 | 0.699841  |
| H                                                         | 0.841526  | -3.749777 | 1.401503  |
| H                                                         | 0.654613  | -2.003365 | 1.299894  |
| H                                                         | -0.193615 | -2.232695 | -1.057434 |
| H                                                         | -3.661207 | -3.789995 | -0.231014 |
| C                                                         | -3.055418 | 0.021566  | -0.753417 |
| H                                                         | -2.015385 | 0.099986  | -1.057523 |
| C                                                         | -3.668850 | 1.087964  | -0.089051 |
| C                                                         | -5.011100 | 1.011658  | 0.293373  |
| H                                                         | -5.469218 | 1.858699  | 0.798002  |
| C                                                         | -5.731605 | -0.148631 | 0.008896  |
| H                                                         | -6.779048 | -0.211518 | 0.298605  |
| C                                                         | 5.146955  | -1.316881 | -0.216804 |
| C                                                         | 2.284723  | -2.785915 | 0.106334  |
| H                                                         | 2.490901  | -3.668790 | -0.520291 |
| H                                                         | 2.316019  | -1.920511 | -0.572632 |
| C                                                         | 5.473408  | 1.257878  | -0.229541 |
| H                                                         | 5.414628  | 2.126601  | 0.442723  |
| H                                                         | 6.535918  | 1.166940  | -0.503161 |
| C                                                         | 3.383030  | -2.659620 | 1.173633  |
| H                                                         | 3.326950  | -3.534712 | 1.839323  |
| H                                                         | 3.170649  | -1.789325 | 1.812545  |
| C                                                         | 4.673187  | 1.549240  | -1.515870 |
| H                                                         | 4.901646  | 0.779073  | -2.266677 |
| H                                                         | 5.035732  | 2.497358  | -1.942276 |
| C                                                         | 3.144483  | 1.616644  | -1.356824 |
| H                                                         | 2.688776  | 1.738714  | -2.350286 |
| H                                                         | 2.768355  | 0.657518  | -0.974264 |
| C                                                         | 5.049709  | 0.005097  | 0.560436  |
| H                                                         | 5.683032  | -0.065423 | 1.458627  |
| H                                                         | 4.024529  | 0.139633  | 0.932831  |
| C                                                         | 2.630667  | 2.749252  | -0.440181 |
| H                                                         | 4.491102  | -1.283342 | -1.097997 |
| C                                                         | 4.819510  | -2.567438 | 0.622652  |
| H                                                         | 5.521516  | -2.614906 | 1.469785  |
| H                                                         | 5.021225  | -3.462076 | 0.013219  |
| H                                                         | 3.127930  | 2.689351  | 0.536861  |
| H                                                         | 2.907981  | 3.720334  | -0.874815 |
| H                                                         | 6.170053  | -1.422470 | -0.610550 |
| Sum of electronic and zero-point Energies= -1201.606400   |           |           |           |
| Sum of electronic and thermal Energies= -1201.577474      |           |           |           |
| Sum of electronic and thermal Enthalpies= -1201.576530    |           |           |           |
| Sum of electronic and thermal Free Energies= -1201.667087 |           |           |           |

daec[n=8]-6-E2 (benzene)

|   |           |           |           |
|---|-----------|-----------|-----------|
| C | 0.016733  | 3.290450  | -0.260774 |
| H | 0.320777  | 4.074068  | -0.952182 |
| C | 0.968193  | 2.589125  | 0.482190  |
| C | 0.518647  | 1.590576  | 1.362105  |
| H | 1.232922  | 1.036719  | 1.968694  |
| C | -0.839489 | 1.309820  | 1.471301  |
| H | -1.195879 | 0.547766  | 2.160898  |
| C | -1.783759 | 2.005126  | 0.707991  |
| O | -3.136319 | 1.756927  | 0.896630  |
| C | -1.359488 | 3.019531  | -0.171621 |
| O | -2.156831 | 3.818156  | -0.933876 |
| C | -3.428998 | 3.361827  | -1.398630 |
| H | -3.372629 | 2.338106  | -1.791184 |
| H | -3.697400 | 4.041865  | -2.214193 |
| H | -4.192398 | 3.413064  | -0.615640 |
| C | -4.867030 | -1.923921 | -0.009906 |
| H | -5.352526 | -2.869828 | -0.244404 |
| C | -3.619225 | -1.622586 | -0.577411 |
| C | -2.935688 | -2.606973 | -1.508675 |
| H | -2.129911 | -2.097591 | -2.053243 |

|                                                           |           |           |           |
|-----------------------------------------------------------|-----------|-----------|-----------|
| H                                                         | -3.658820 | -2.936680 | -2.268782 |
| C                                                         | -2.378214 | -3.868104 | -0.806479 |
| H                                                         | -2.075808 | -4.586975 | -1.583257 |
| C                                                         | -1.195406 | -3.637534 | 0.150167  |
| H                                                         | -1.027641 | -4.567370 | 0.714964  |
| H                                                         | -1.466761 | -2.876189 | 0.896775  |
| C                                                         | 0.122128  | -3.239482 | -0.534652 |
| H                                                         | 0.356158  | -3.974165 | -1.321940 |
| C                                                         | 1.304897  | -3.152649 | 0.441645  |
| H                                                         | 1.425264  | -4.123331 | 0.948717  |
| H                                                         | 1.068065  | -2.425180 | 1.234300  |
| H                                                         | 0.006694  | -2.272460 | -1.046872 |
| H                                                         | -3.197245 | -4.346920 | -0.250520 |
| C                                                         | -3.017935 | -0.392936 | -0.271762 |
| H                                                         | -2.056839 | -0.139123 | -0.710147 |
| C                                                         | -3.650266 | 0.511348  | 0.590237  |
| C                                                         | -4.892858 | 0.206118  | 1.153147  |
| H                                                         | -5.366372 | 0.925386  | 1.816619  |
| C                                                         | -5.494322 | -1.014645 | 0.845068  |
| H                                                         | -6.463967 | -1.255985 | 1.276817  |
| C                                                         | 5.307232  | -0.943249 | -0.420509 |
| C                                                         | 2.634012  | -2.760556 | -0.221592 |
| H                                                         | 2.858102  | -3.466588 | -1.037476 |
| H                                                         | 2.518545  | -1.775301 | -0.697710 |
| C                                                         | 5.418194  | 1.192768  | 0.118064  |
| H                                                         | 5.309750  | 2.289981  | 0.961975  |
| H                                                         | 6.472723  | 1.662776  | -0.190445 |
| C                                                         | 3.813672  | -2.737656 | 0.763125  |
| H                                                         | 3.903610  | -3.733433 | 1.224046  |
| H                                                         | 3.583120  | -2.049601 | 1.590279  |
| C                                                         | 4.544730  | 2.071413  | -1.059504 |
| H                                                         | 4.807730  | 1.498715  | -1.960652 |
| H                                                         | 4.807821  | 3.116718  | -1.283792 |
| C                                                         | 3.023707  | 1.964550  | -0.856932 |
| H                                                         | 2.520393  | 2.245011  | -1.793656 |
| H                                                         | 2.746039  | 0.916991  | -0.673620 |
| C                                                         | 5.140179  | 0.166416  | 0.629513  |
| H                                                         | 5.822408  | -0.035642 | 1.470135  |
| H                                                         | 4.127483  | 0.123196  | 1.054466  |
| C                                                         | 2.449884  | 2.834003  | 0.284141  |
| H                                                         | 4.583073  | -0.800509 | -1.234921 |
| C                                                         | 5.176330  | -2.371640 | 0.143526  |
| H                                                         | 5.955601  | -2.518826 | 0.907530  |
| H                                                         | 5.402798  | -3.089127 | -0.660493 |
| H                                                         | 2.980165  | 2.614984  | 1.220488  |
| H                                                         | 2.633836  | 3.894149  | 0.058624  |
| H                                                         | 6.301162  | -0.846178 | -0.884875 |
| Sum of electronic and zero-point Energies= -1201.604977   |           |           |           |
| Sum of electronic and thermal Energies= -1201.576147      |           |           |           |
| Sum of electronic and thermal Enthalpies= -1201.575203    |           |           |           |
| Sum of electronic and thermal Free Energies= -1201.665754 |           |           |           |

daec[n=8]-7-TS (benzene)

|   |           |           |           |
|---|-----------|-----------|-----------|
| C | 0.389276  | 3.394828  | -0.525521 |
| H | 0.805979  | 4.389781  | -0.655686 |
| C | 1.262004  | 2.317319  | -0.298089 |
| C | 0.703706  | 1.048129  | -0.133645 |
| H | 1.343202  | 0.184101  | 0.027971  |
| C | -0.677023 | 0.857566  | -0.157656 |
| H | -1.080556 | -0.134648 | 0.005647  |
| C | -1.541128 | 1.927653  | -0.370489 |
| O | -2.920101 | 1.804376  | -0.405393 |
| C | -1.001692 | 3.218205  | -0.572478 |
| O | -1.904834 | 4.214991  | -0.784163 |
| C | -1.413142 | 5.529008  | -0.996071 |
| H | -0.859360 | 5.903242  | -0.122229 |
| H | -0.767719 | 5.583933  | -1.885163 |
| H | -2.296269 | 6.155120  | -1.155059 |
| C | -4.445069 | -1.386879 | 1.785012  |
| H | -4.804069 | -2.222942 | 2.384147  |

|   |           |           |           |
|---|-----------|-----------|-----------|
| C | -3.934763 | -1.635204 | 0.497302  |
| C | -3.844079 | -3.078734 | 0.021775  |
| H | -4.861491 | -3.499651 | 0.008504  |
| H | -3.316687 | -3.646806 | 0.802840  |
| C | -3.201058 | -3.399602 | -1.341435 |
| H | -3.330397 | -4.482501 | -1.485851 |
| C | -1.710487 | -3.060945 | -1.571058 |
| H | -1.590537 | -1.991636 | -1.789869 |
| H | -1.405207 | -3.577497 | -2.494323 |
| C | -0.713636 | -3.422458 | -0.455473 |
| H | -0.875506 | -4.455847 | -0.110920 |
| C | 0.738670  | -3.261827 | -0.944844 |
| H | 0.811355  | -2.339906 | -1.543243 |
| H | 0.966582  | -4.083253 | -1.642517 |
| H | -0.887170 | -2.778173 | 0.419723  |
| H | -3.787592 | -2.925751 | -2.142900 |
| C | -3.494153 | -0.540758 | -0.256308 |
| H | -3.120221 | -0.669211 | -1.266502 |
| C | -3.468827 | 0.742077  | 0.304099  |
| C | -3.976519 | 0.981261  | 1.578479  |
| H | -3.952625 | 1.989057  | 1.984887  |
| C | -4.488115 | -0.095943 | 2.309197  |
| H | -4.894443 | 0.072326  | 3.304813  |
| C | 4.632361  | -1.503785 | 0.918986  |
| C | 1.822642  | -3.209348 | 0.145597  |
| H | 1.687977  | -2.295151 | 0.744225  |
| H | 1.700319  | -4.050283 | 0.846275  |
| C | 5.487086  | 0.812055  | 0.024852  |
| H | 6.538131  | 0.620650  | 0.291000  |
| H | 5.522676  | 1.376092  | -0.919119 |
| C | 3.236678  | -3.254358 | -0.462623 |
| H | 3.383295  | -4.252861 | -0.901973 |
| C | 3.285368  | -2.554678 | -1.310033 |
| C | 4.880987  | 1.707355  | 1.127334  |
| H | 5.388909  | 2.683398  | 1.087850  |
| H | 5.128412  | 1.284370  | 2.112340  |
| C | 3.357097  | 1.909031  | 1.088006  |
| H | 2.879088  | 0.942915  | 1.287690  |
| H | 3.061641  | 2.557624  | 1.925816  |
| C | 4.796814  | -0.536520 | -0.268820 |
| H | 3.814310  | -0.349244 | -0.724319 |
| H | 5.389225  | -1.037989 | -1.050398 |
| C | 2.770197  | 2.491715  | -0.217727 |
| H | 5.537928  | -1.470663 | 1.544531  |
| C | 4.411119  | -2.973631 | 0.496757  |
| H | 4.299131  | -3.592666 | 1.400460  |
| H | 5.334165  | -3.321421 | 0.007522  |
| H | 3.034573  | 3.554666  | -0.307634 |
| H | 3.232569  | 1.990513  | -1.080689 |
| H | 3.810813  | -1.167207 | 1.567674  |

Sum of electronic and zero-point Energies= -1201.588300

Sum of electronic and thermal Energies= -1201.560437

Sum of electronic and thermal Enthalpies= -1201.559493

Sum of electronic and thermal Free Energies= -1201.646296

daec[n=8]-7-E1 (benzene)

|   |           |           |           |
|---|-----------|-----------|-----------|
| C | 0.534973  | 2.066629  | -0.894625 |
| H | 1.210776  | 1.651204  | -1.637255 |
| C | 1.076052  | 2.748735  | 0.209191  |
| C | 0.205160  | 3.303124  | 1.152905  |
| H | 0.603349  | 3.847119  | 2.007432  |
| C | -1.178518 | 3.151895  | 1.013270  |
| H | -1.867505 | 3.573890  | 1.741418  |
| C | -1.706000 | 2.456426  | -0.068390 |
| O | -3.076742 | 2.370506  | -0.226963 |
| C | -0.847470 | 1.917297  | -1.050773 |
| O | -1.454141 | 1.282271  | -2.086892 |
| C | -0.639502 | 0.751969  | -3.122998 |
| H | -0.049964 | 1.538484  | -3.615771 |
| H | 0.036564  | -0.030273 | -2.748532 |

|   |           |           |           |
|---|-----------|-----------|-----------|
| H | -1.330431 | 0.311657  | -3.847560 |
| C | -5.169036 | -1.153503 | 0.518914  |
| H | -5.746411 | -2.055069 | 0.717840  |
| C | -3.839546 | -1.067498 | 0.959823  |
| C | -3.199549 | -2.226500 | 1.702187  |
| H | -3.895398 | -2.576518 | 2.478403  |
| H | -2.303585 | -1.875361 | 2.230810  |
| C | -2.839761 | -3.437042 | 0.807618  |
| H | -2.586262 | -4.285339 | 1.461865  |
| C | -1.689486 | -3.214761 | -0.190023 |
| H | -1.898432 | -2.324395 | -0.801813 |
| H | -1.672516 | -4.065410 | -0.888627 |
| C | -0.298927 | -3.083292 | 0.452262  |
| H | -0.120510 | -3.949551 | 1.109557  |
| C | 0.836192  | -2.991041 | -0.578205 |
| H | 0.643974  | -2.140379 | -1.251865 |
| H | 0.820633  | -3.889367 | -1.215760 |
| H | -0.265269 | -2.197001 | 1.103507  |
| H | -3.740138 | -3.737822 | 0.252748  |
| C | -3.118005 | 0.107995  | 0.706440  |
| H | -2.093098 | 0.198611  | 1.056240  |
| C | -3.713613 | 1.172071  | 0.020330  |
| C | -5.038563 | 1.081809  | -0.416255 |
| H | -5.481230 | 1.923439  | -0.942926 |
| C | -5.758681 | -0.085252 | -0.161427 |
| H | -6.792365 | -0.158443 | -0.495113 |
| C | 5.074893  | -1.323879 | 0.340332  |
| C | 2.231860  | -2.833377 | 0.043691  |
| H | 2.243040  | -1.927029 | 0.667488  |
| H | 2.424445  | -3.674453 | 0.728993  |
| C | 5.399994  | 1.245836  | 0.202363  |
| H | 6.465614  | 1.170423  | 0.468415  |
| H | 5.332355  | 2.076737  | -0.515369 |
| C | 3.354875  | -2.767617 | -1.003244 |
| H | 3.320628  | -3.683970 | -1.612495 |
| H | 3.151941  | -1.941428 | -1.701391 |
| C | 4.613990  | 1.604114  | 1.480209  |
| H | 4.991437  | 2.565367  | 1.861907  |
| H | 4.839776  | 0.864717  | 2.262050  |
| C | 3.085226  | 1.685047  | 1.329107  |
| H | 2.695429  | 0.723467  | 0.966590  |
| H | 2.637323  | 1.830076  | 2.322820  |
| C | 4.970676  | -0.049672 | -0.512639 |
| H | 3.942673  | 0.063365  | -0.885302 |
| H | 5.598584  | -0.171422 | -1.409196 |
| C | 2.578556  | 2.808508  | 0.397096  |
| H | 6.093965  | -1.392004 | 0.752276  |
| C | 4.777301  | -2.626653 | -0.427550 |
| H | 4.973875  | -3.480039 | 0.239871  |
| H | 5.498045  | -2.718549 | -1.255009 |
| H | 2.868865  | 3.781981  | 0.818165  |
| H | 3.071179  | 2.731335  | -0.581144 |
| H | 4.407155  | -1.248485 | 1.209925  |

Sum of electronic and zero-point Energies= -1201.608641

Sum of electronic and thermal Energies= -1201.579905

Sum of electronic and thermal Enthalpies= -1201.578961

Sum of electronic and thermal Free Energies= -1201.669073

daec[n=8]-7-E2 (benzene)

|   |           |          |           |
|---|-----------|----------|-----------|
| C | -0.036270 | 2.982064 | 0.324853  |
| H | 0.225273  | 3.578120 | 1.194949  |
| C | 0.990047  | 2.527944 | -0.522385 |
| C | 0.650470  | 1.775709 | -1.651363 |
| H | 1.430060  | 1.426293 | -2.325658 |
| C | -0.686156 | 1.460688 | -1.917424 |
| H | -0.963498 | 0.875273 | -2.791147 |
| C | -1.693232 | 1.893226 | -1.064060 |
| O | -3.015691 | 1.622155 | -1.365220 |
| C | -1.377454 | 2.674339 | 0.068822  |
| O | -2.429563 | 3.063146 | 0.834290  |

|   |           |           |           |
|---|-----------|-----------|-----------|
| C | -2.165698 | 3.840830  | 1.993828  |
| H | -1.531789 | 3.298244  | 2.710052  |
| H | -1.690490 | 4.799006  | 1.738592  |
| H | -3.140784 | 4.033196  | 2.450492  |
| C | -5.040391 | -1.606257 | 0.317629  |
| H | -5.595372 | -2.440637 | 0.743755  |
| C | -3.690195 | -1.426776 | 0.652126  |
| C | -2.990911 | -2.402880 | 1.579484  |
| H | -3.683338 | -2.683907 | 2.385564  |
| H | -2.140055 | -1.906523 | 2.064773  |
| C | -2.512079 | -3.703680 | 0.888526  |
| H | -2.217952 | -4.419827 | 1.671223  |
| C | -1.348704 | -3.545847 | -0.106552 |
| H | -1.602236 | -2.778022 | -0.852442 |
| H | -1.245240 | -4.487855 | -0.666589 |
| C | 0.005573  | -3.210549 | 0.538689  |
| H | 0.241148  | -3.973206 | 1.298497  |
| C | 1.158646  | -3.132131 | -0.473177 |
| H | 0.923841  | -2.368174 | -1.231184 |
| H | 1.229648  | -4.087469 | -1.017312 |
| H | -0.059454 | -2.254837 | 1.080481  |
| H | -3.369710 | -4.153898 | 0.367980  |
| C | -2.994948 | -0.339081 | 0.102310  |
| H | -1.950421 | -0.183033 | 0.356838  |
| C | -3.638492 | 0.547139  | -0.767860 |
| C | -4.985606 | 0.364081  | -1.097694 |
| H | -5.465656 | 1.068697  | -1.772100 |
| C | -5.677898 | -0.715065 | -0.550009 |
| H | -6.727878 | -0.857986 | -0.799656 |
| C | 5.239538  | -1.080309 | 0.401689  |
| C | 2.518261  | -2.809038 | 0.164958  |
| H | 2.441431  | -1.848941 | 0.696978  |
| H | 2.749257  | -3.563351 | 0.934459  |
| C | 5.387471  | 1.483861  | 0.036953  |
| H | 6.426828  | 1.519523  | 0.398190  |
| H | 5.326657  | 2.235303  | -0.764044 |
| C | 3.669521  | -2.757421 | -0.851626 |
| H | 3.719490  | -3.724936 | -1.374599 |
| H | 3.435186  | -2.013943 | -1.628165 |
| C | 4.463122  | 1.897051  | 1.201046  |
| H | 4.723446  | 2.922852  | 1.504760  |
| H | 4.677739  | 1.264735  | 2.074583  |
| C | 2.953349  | 1.818126  | 0.916520  |
| H | 2.683919  | 0.792441  | 0.629069  |
| H | 2.404703  | 2.018258  | 1.848448  |
| C | 5.116756  | 0.097345  | -0.578027 |
| H | 4.119333  | 0.093208  | -1.039581 |
| H | 5.826306  | -0.056292 | -1.406082 |
| C | 2.441859  | 2.786719  | -0.173466 |
| H | 6.234769  | -1.046688 | 0.872106  |
| C | 5.057555  | -2.466045 | -0.248183 |
| H | 5.283363  | -3.238449 | 0.503402  |
| H | 5.814085  | -2.584954 | -1.039498 |
| H | 2.574864  | 3.821919  | 0.174226  |
| H | 3.051103  | 2.681323  | -1.080327 |
| H | 4.518657  | -0.962120 | 1.222757  |

Sum of electronic and zero-point Energies= -1201.608289  
Sum of electronic and thermal Energies= -1201.579574  
Sum of electronic and thermal Enthalpies= -1201.578630  
Sum of electronic and thermal Free Energies= -1201.668930

#### jugcathanin-1-TS (benzene)

|   |          |           |           |
|---|----------|-----------|-----------|
| C | 1.328887 | 2.723391  | -0.134979 |
| O | 1.757658 | 3.986203  | -0.017494 |
| H | 0.984804 | 4.565247  | -0.283781 |
| C | 2.203069 | 1.627905  | -0.269926 |
| C | 1.642001 | 0.410180  | 0.046650  |
| H | 2.258700 | -0.453187 | 0.018039  |
| C | 0.339591 | 0.210178  | 0.404942  |
| H | 0.052771 | -0.805161 | 0.558022  |

|   |           |           |           |
|---|-----------|-----------|-----------|
| C | -0.548363 | 1.266376  | 0.536903  |
| O | -1.879601 | 1.048030  | 0.924041  |
| C | -0.030494 | 2.549873  | 0.274567  |
| O | -0.773797 | 3.714421  | 0.307647  |
| C | -1.395575 | 4.025239  | 1.563375  |
| H | -1.840260 | 5.018501  | 1.443693  |
| H | -2.178678 | 3.297813  | 1.802607  |
| H | -0.653058 | 4.049742  | 2.373804  |
| C | -2.475867 | -2.852652 | -0.333029 |
| H | -2.490303 | -3.831490 | -0.811223 |
| C | -1.599798 | -2.610232 | 0.733225  |
| C | -0.408389 | -3.526960 | 1.020251  |
| H | -0.733478 | -4.574854 | 1.035747  |
| H | 0.017483  | -3.310550 | 2.007336  |
| C | 0.737682  | -3.391256 | -0.056027 |
| H | 0.352128  | -2.926779 | -0.972234 |
| H | 1.060493  | -4.398823 | -0.364412 |
| C | 2.044149  | -2.667870 | 0.355288  |
| C | 3.015855  | -2.271336 | -0.795744 |
| H | 2.421775  | -2.006721 | -1.679887 |
| H | 3.517377  | -3.215353 | -1.063770 |
| C | 4.115946  | -1.176793 | -0.508920 |
| H | 4.135101  | -0.969602 | 0.568842  |
| C | 4.056317  | 0.166151  | -1.350289 |
| H | 3.408265  | 0.003734  | -2.223766 |
| C | 3.657065  | 1.547423  | -0.710719 |
| H | 4.325033  | 1.760045  | 0.139682  |
| H | 3.877214  | 2.323070  | -1.456742 |
| H | 5.063461  | 0.321685  | -1.759090 |
| H | 5.085291  | -1.640970 | -0.726629 |
| O | 2.325309  | -2.477084 | 1.520787  |
| C | -1.670656 | -1.338122 | 1.329947  |
| H | -1.038957 | -1.113363 | 2.185273  |
| C | -2.298119 | -0.269702 | 0.681014  |
| C | -3.172007 | -0.519534 | -0.394831 |
| O | -3.783062 | 0.557849  | -0.949627 |
| C | -4.618235 | 0.344553  | -2.079450 |
| H | -4.060351 | -0.096653 | -2.918047 |
| H | -4.982498 | 1.334104  | -2.370225 |
| H | -5.476704 | -0.297493 | -1.833728 |
| C | -3.305717 | -1.845217 | -0.841240 |
| H | -3.981727 | -2.077870 | -1.658402 |

Sum of electronic and zero-point Energies= -1190.266199  
Sum of electronic and thermal Energies= -1190.242807  
Sum of electronic and thermal Enthalpies= -1190.241863  
Sum of electronic and thermal Free Energies= -1190.317758

#### jugcathanin-1-E1 (benzene)

|   |           |           |           |
|---|-----------|-----------|-----------|
| C | -1.730207 | -1.918417 | -0.396189 |
| O | -2.232953 | -2.279493 | -1.609615 |
| H | -1.463876 | -2.447241 | -2.182011 |
| C | -2.603956 | -1.544804 | 0.638617  |
| C | -2.036217 | -1.229239 | 1.879760  |
| H | -2.695169 | -0.969475 | 2.705902  |
| C | -0.652761 | -1.175424 | 2.071590  |
| H | -0.223960 | -0.865778 | 3.020908  |
| C | 0.195412  | -1.435267 | 0.996958  |
| O | 1.560567  | -1.219186 | 1.110391  |
| C | -0.335804 | -1.864295 | -0.226684 |
| O | 0.412347  | -2.137561 | -1.349483 |
| C | 1.411377  | -3.165905 | -1.219324 |
| H | 1.776034  | -3.355950 | -2.233741 |
| H | 2.237219  | -2.833184 | -0.583383 |
| H | 0.970070  | -4.084830 | -0.809310 |
| C | 2.997592  | 2.366289  | -0.463288 |
| H | 3.399863  | 3.281581  | -0.894471 |
| C | 1.659763  | 2.312437  | -0.069180 |
| C | 0.729939  | 3.502621  | -0.231871 |
| H | 1.273073  | 4.303950  | -0.747757 |
| H | 0.440056  | 3.901149  | 0.750561  |

|   |           |           |           |
|---|-----------|-----------|-----------|
| C | -0.570565 | 3.195566  | -1.010427 |
| H | -0.373852 | 2.542549  | -1.869863 |
| H | -0.970544 | 4.135839  | -1.423739 |
| C | -1.708224 | 2.624748  | -0.154387 |
| C | -2.600234 | 1.586730  | -0.820836 |
| H | -1.950351 | 0.715937  | -0.997650 |
| H | -2.861355 | 1.943492  | -1.829633 |
| C | -3.855579 | 1.180315  | -0.032940 |
| H | -3.605593 | 1.145306  | 1.034356  |
| C | -4.464905 | -0.169123 | -0.490090 |
| H | -4.178345 | -0.373827 | -1.529891 |
| C | -4.088059 | -1.395452 | 0.386985  |
| H | -4.594310 | -1.303136 | 1.357470  |
| H | -4.489099 | -2.297395 | -0.095673 |
| H | -5.561368 | -0.098457 | -0.485970 |
| H | -4.603268 | 1.978427  | -0.135063 |
| O | -1.874089 | 2.990675  | 0.994487  |
| C | 1.188866  | 1.107029  | 0.478160  |
| H | 0.163630  | 1.036011  | 0.823928  |
| C | 2.008085  | -0.010269 | 0.597826  |
| C | 3.363379  | 0.055089  | 0.207439  |
| O | 4.092148  | -1.086667 | 0.365160  |
| C | 5.463844  | -1.052522 | -0.001365 |
| H | 5.593405  | -0.840967 | -1.073040 |
| H | 5.856256  | -2.049805 | 0.218238  |
| H | 6.020980  | -0.308264 | 0.585995  |
| C | 3.844425  | 1.257487  | -0.317049 |
| H | 4.879328  | 1.336352  | -0.635914 |

Sum of electronic and zero-point Energies= -1190.337603  
Sum of electronic and thermal Energies= -1190.313474  
Sum of electronic and thermal Enthalpies= -1190.312530  
Sum of electronic and thermal Free Energies= -1190.390784

#### jugcathanin-1-E2 (benzene)

|   |           |           |           |
|---|-----------|-----------|-----------|
| C | -1.834455 | -1.711998 | 0.547068  |
| O | -2.404797 | -1.781047 | 1.781057  |
| H | -1.671338 | -1.779367 | 2.420883  |
| C | -2.639131 | -1.586838 | -0.597228 |
| C | -1.994503 | -1.563723 | -1.842413 |
| H | -2.599925 | -1.505446 | -2.745722 |
| C | -0.601854 | -1.543086 | -1.954795 |
| H | -0.110297 | -1.457641 | -2.920358 |
| C | 0.178255  | -1.566744 | -0.797753 |
| O | 1.550587  | -1.398054 | -0.880555 |
| C | -0.431016 | -1.717467 | 0.452832  |
| O | 0.249939  | -1.741703 | 1.647789  |
| C | 1.215234  | -2.795686 | 1.810505  |
| H | 1.565880  | -2.721200 | 2.844364  |
| H | 0.748173  | -3.777201 | 1.649362  |
| H | 2.057501  | -2.669725 | 1.122799  |
| C | 3.107893  | 2.308721  | 0.225696  |
| H | 3.549179  | 3.261944  | 0.512967  |
| C | 1.725333  | 2.206220  | 0.047355  |
| C | 0.814646  | 3.399537  | 0.297802  |
| H | 1.335706  | 4.311979  | -0.020873 |
| H | 0.643475  | 3.506870  | 1.378818  |
| C | -0.566018 | 3.348962  | -0.382191 |
| H | -0.490186 | 3.017153  | -1.425746 |
| H | -0.976330 | 4.370899  | -0.419897 |
| C | -1.623065 | 2.524245  | 0.366094  |
| C | -2.657596 | 1.817729  | -0.500451 |
| H | -2.102068 | 1.091952  | -1.113337 |
| H | -3.048664 | 2.547379  | -1.228224 |
| C | -3.802997 | 1.125282  | 0.254535  |
| H | -3.403578 | 0.638699  | 1.151596  |
| C | -4.578893 | 0.101577  | -0.613026 |
| H | -4.510568 | 0.393527  | -1.671758 |
| C | -4.133349 | -1.380271 | -0.463226 |
| H | -4.460219 | -1.748828 | 0.515296  |
| H | -4.661807 | -1.976999 | -1.220234 |

|   |           |           |           |
|---|-----------|-----------|-----------|
| H | -5.647779 | 0.141984  | -0.361346 |
| H | -4.494899 | 1.896417  | 0.619141  |
| O | -1.630314 | 2.462748  | 1.580519  |
| C | 1.211636  | 0.958681  | -0.332706 |
| H | 0.147919  | 0.836447  | -0.491758 |
| C | 2.031294  | -0.153390 | -0.503150 |
| C | 3.423215  | -0.046389 | -0.307720 |
| O | 4.146485  | -1.188834 | -0.483104 |
| C | 5.551725  | -1.117928 | -0.293379 |
| H | 6.022473  | -0.423332 | -1.004486 |
| H | 5.929023  | -2.128437 | -0.476468 |
| H | 5.808966  | -0.816843 | 0.732886  |
| C | 3.946728  | 1.200518  | 0.050324  |
| H | 5.015662  | 1.317173  | 0.201421  |

Sum of electronic and zero-point Energies= -1190.335968  
Sum of electronic and thermal Energies= -1190.311849  
Sum of electronic and thermal Enthalpies= -1190.310905  
Sum of electronic and thermal Free Energies= -1190.389287

#### jugcathanin-2-TS (benzene)

|   |           |           |           |
|---|-----------|-----------|-----------|
| C | 1.120079  | 2.829996  | 0.163391  |
| O | 1.434007  | 4.144143  | -0.001435 |
| H | 0.635309  | 4.643868  | 0.244496  |
| C | 2.082811  | 1.830001  | -0.072478 |
| C | 1.633408  | 0.545238  | 0.141598  |
| H | 2.323028  | -0.254730 | 0.036033  |
| C | 0.361808  | 0.203173  | 0.502873  |
| H | 0.166964  | -0.842133 | 0.580769  |
| C | -0.603789 | 1.164731  | 0.755768  |
| O | -1.893586 | 0.801445  | 1.173738  |
| C | -0.209476 | 2.505061  | 0.578523  |
| O | -1.028672 | 3.593358  | 0.811707  |
| C | -2.208676 | 3.664069  | -0.006582 |
| H | -2.723737 | 4.584661  | 0.286526  |
| H | -1.940632 | 3.715973  | -1.071958 |
| H | -2.859096 | 2.800661  | 0.165871  |
| C | -2.217791 | -3.006668 | -0.420133 |
| H | -2.171144 | -3.937549 | -0.984237 |
| C | -1.326521 | -2.786854 | 0.638493  |
| C | -0.055985 | -3.622675 | 0.808907  |
| H | -0.294423 | -4.691099 | 0.734134  |
| H | 0.382360  | -3.462229 | 1.801150  |
| C | 1.040133  | -3.294317 | -0.277954 |
| H | 0.588610  | -2.786512 | -1.139468 |
| H | 1.435971  | -4.239539 | -0.683059 |
| C | 2.294350  | -2.500238 | 0.165133  |
| C | 3.193256  | -1.922868 | -0.968498 |
| H | 2.551584  | -1.629102 | -1.809123 |
| H | 3.759221  | -2.794447 | -1.335326 |
| C | 4.211653  | -0.772420 | -0.608291 |
| H | 4.249327  | -0.663525 | 0.483320  |
| C | 4.019537  | 0.632721  | -1.318012 |
| H | 4.999049  | 0.908525  | -1.730480 |
| C | 3.527369  | 1.911315  | -0.543488 |
| H | 3.666566  | 2.768391  | -1.216249 |
| H | 4.196464  | 2.097929  | 0.312019  |
| H | 3.362702  | 0.497759  | -2.189680 |
| H | 5.207137  | -1.133828 | -0.892759 |
| O | 2.595195  | -2.388855 | 1.335878  |
| C | -1.478978 | -1.583798 | 1.351378  |
| H | -0.838708 | -1.383051 | 2.206289  |
| C | -2.213536 | -0.518343 | 0.820668  |
| C | -3.099477 | -0.743945 | -0.249920 |
| O | -3.812005 | 0.327049  | -0.691281 |
| C | -4.677198 | 0.142463  | -1.804126 |
| H | -5.131575 | 1.119452  | -1.992576 |
| H | -5.470255 | -0.586374 | -1.583525 |
| H | -4.123691 | -0.178567 | -2.698358 |
| C | -3.143445 | -2.030793 | -0.811609 |
| H | -3.827729 | -2.246757 | -1.626506 |

Sum of electronic and zero-point Energies= -1190.266892  
Sum of electronic and thermal Energies= -1190.243595  
Sum of electronic and thermal Enthalpies= -1190.242651  
Sum of electronic and thermal Free Energies= -1190.318089

jugcathanin-2-E1 (benzene)

C -2.049414 -1.973958 -0.206698  
O -2.798394 -2.459285 -1.236062  
H -2.171271 -2.833780 -1.878343  
C -2.683374 -1.336483 0.868298  
C -1.877333 -0.898647 1.928700  
H -2.348727 -0.438313 2.794452  
C -0.489265 -0.991293 1.875554  
H 0.132439 -0.595720 2.674323  
C 0.134392 -1.530355 0.747010  
O 1.517677 -1.477835 0.638334  
C -0.641786 -2.075395 -0.285520  
O -0.204804 -2.739099 -1.405260  
C 1.011465 -2.352739 -2.059142  
H 0.993664 -2.862517 -3.027687  
H 1.046990 -1.267608 -2.219515  
H 1.888059 -2.672944 -1.488926  
C 3.263987 2.194100 -0.302173  
H 3.755825 3.132591 -0.553118  
C 1.869748 2.124522 -0.265065  
C 1.004553 3.344633 -0.541539  
H 1.569971 4.036776 -1.178481  
H 0.806272 3.883445 0.396660  
C -0.360647 3.053321 -1.200469  
H -0.274205 2.284927 -1.979279  
H -0.707958 3.965768 -1.711140  
C -1.488226 2.699233 -0.219905  
C -2.511685 1.680418 -0.706535  
H -1.962347 0.733611 -0.823070  
H -2.811383 1.952407 -1.731189  
C -3.740464 1.485716 0.195117  
H -3.418958 1.517029 1.243384  
C -4.523236 0.179429 -0.089631  
H -5.599138 0.364877 0.035123  
C -4.162025 -1.023596 0.825336  
H -4.731339 -1.898155 0.483880  
H -4.500071 -0.800215 1.846451  
H -4.386739 -0.116832 -1.138655  
H -4.406195 2.349708 0.065204  
O -1.551641 3.220472 0.877115  
C 1.289901 0.888425 0.058891  
H 0.212919 0.797189 0.105017  
C 2.059076 -0.237013 0.342888  
C 3.468260 -0.158693 0.301764  
O 4.142687 -1.310372 0.571629  
C 5.561872 -1.264204 0.565634  
H 5.894105 -2.274917 0.820469  
H 5.947959 -0.557476 1.314852  
H 5.955910 -0.993972 -0.425318  
C 4.053418 1.069854 -0.020479  
H 5.134701 1.159421 -0.063362

Sum of electronic and zero-point Energies= -1190.333932  
Sum of electronic and thermal Energies= -1190.309890  
Sum of electronic and thermal Enthalpies= -1190.308946  
Sum of electronic and thermal Free Energies= -1190.387075

jugcathanin-2-E2 (benzene)

C -1.834332 -1.712090 0.547056  
O -2.404515 -1.781295 1.781120  
H -1.670967 -1.779417 2.420841  
C -2.639146 -1.586904 -0.597156  
C -1.994652 -1.563719 -1.842401  
H -2.600192 -1.505420 -2.745630  
C -0.602007 -1.543032 -1.954957  
H -0.110565 -1.457560 -2.920578

C 0.178217 -1.566662 -0.798002  
O 1.550545 -1.397966 -0.880833  
C -0.430929 -1.717456 0.452643  
O 0.250242 -1.741577 1.647511  
C 1.215277 -2.795846 1.810207  
H 1.566067 -2.721364 2.844017  
H 0.747938 -3.777253 1.649222  
H 2.057495 -2.670158 1.122390  
C 3.107783 2.308651 0.226009  
H 3.549037 3.261825 0.513491  
C 1.725266 2.206276 0.047173  
C 0.814660 3.399720 0.297344  
H 1.335712 4.312021 -0.021753  
H 0.643687 3.507444 1.378346  
C -0.566115 3.349034 -0.382438  
H -0.490414 3.017153 -1.425982  
H -0.976445 4.370960 -0.420175  
C -1.623040 2.524349 0.366062  
C -2.657631 1.817665 -0.500281  
H -2.102154 1.091904 -1.113221  
H -3.048885 2.547236 -1.228038  
C -3.802872 1.125164 0.254922  
H -3.403270 0.638528 1.151868  
C -4.578942 0.101507 -0.612547  
H -5.647777 0.141887 -0.360652  
C -4.133359 -1.380360 -0.462954  
H -4.661893 -1.976998 -1.219976  
H -4.460120 -1.749026 0.515559  
H -4.510833 0.393532 -1.671271  
H -4.494704 1.896268 0.619731  
O -1.630180 2.463029 1.580487  
C 1.211602 0.958802 -0.333123  
H 0.147937 0.836637 -0.492594  
C 2.031245 -0.153329 -0.503286  
C 3.423117 -0.046443 -0.307439  
O 4.146368 -1.188934 -0.482615  
C 5.551706 -1.117884 -0.293449  
H 5.929053 -2.128284 -0.476997  
H 5.809354 -0.817068 0.732797  
H 6.022070 -0.422995 -1.004520  
C 3.946603 1.200408 0.050854  
H 5.015491 1.316979 0.202347

Sum of electronic and zero-point Energies= -1190.335967  
Sum of electronic and thermal Energies= -1190.311849  
Sum of electronic and thermal Enthalpies= -1190.310905  
Sum of electronic and thermal Free Energies= -1190.389275

jugcathanin-3-TS (benzene)

C 0.387776 2.923647 -0.140771  
O 0.403980 4.260077 -0.398242  
H -0.520751 4.559000 -0.344353  
C 1.571159 2.164282 -0.230779  
C 1.413630 0.826034 0.057032  
H 2.272837 0.202941 0.045640  
C 0.230070 0.215119 0.361977  
H 0.274414 -0.838929 0.516393  
C -0.949484 0.935273 0.447712  
O -2.162074 0.308183 0.771706  
C -0.859118 2.317830 0.201950  
O -1.954882 3.165123 0.202715  
C -2.558224 3.367971 1.491116  
H -2.978263 2.432377 1.877976  
H -1.827203 3.766955 2.208535  
H -3.361294 4.096867 1.341038  
C -1.379471 -3.516411 -0.622884  
H -1.033071 -4.422929 -1.117996  
C -0.722338 -3.054546 0.532520  
C 0.675081 -3.553158 0.907235  
H 0.700343 -4.650232 0.900307  
H 0.940362 -3.234218 1.922253

|   |           |           |           |
|---|-----------|-----------|-----------|
| C | 1.788148  | -3.036422 | -0.084240 |
| H | 1.337166  | -2.690210 | -1.022744 |
| H | 2.431352  | -3.882238 | -0.376077 |
| C | 2.768363  | -1.949446 | 0.421230  |
| C | 3.657930  | -1.256326 | -0.653455 |
| H | 3.099113  | -1.207750 | -1.596949 |
| H | 4.466909  | -1.981108 | -0.839491 |
| C | 4.303140  | 0.142233  | -0.309992 |
| H | 4.170482  | 0.338025  | 0.761885  |
| C | 3.858123  | 1.389193  | -1.182518 |
| H | 4.780324  | 1.865066  | -1.540959 |
| C | 2.993877  | 2.563507  | -0.592961 |
| H | 2.989433  | 3.368282  | -1.340667 |
| H | 3.505238  | 2.984478  | 0.287824  |
| H | 3.349129  | 1.021789  | -2.085367 |
| H | 5.385287  | 0.031731  | -0.447804 |
| O | 2.883971  | -1.694804 | 1.602593  |
| C | -1.254537 | -1.910197 | 1.142278  |
| H | -0.796673 | -1.525091 | 2.050084  |
| C | -2.151688 | -1.067663 | 0.461225  |
| C | -2.806886 | -1.537628 | -0.688912 |
| O | -3.709037 | -0.850196 | -1.436109 |
| C | -4.485486 | 0.193675  | -0.841020 |
| H | -5.338989 | 0.338405  | -1.511781 |
| H | -3.918371 | 1.126136  | -0.758019 |
| H | -4.850504 | -0.101743 | 0.151785  |
| C | -2.448024 | -2.811625 | -1.171278 |
| H | -2.965182 | -3.176708 | -2.055614 |

Sum of electronic and zero-point Energies= -1190.265876  
Sum of electronic and thermal Energies= -1190.242514  
Sum of electronic and thermal Enthalpies= -1190.241570  
Sum of electronic and thermal Free Energies= -1190.316998

#### jucathanan-3-E1 (benzene)

|   |           |           |           |
|---|-----------|-----------|-----------|
| C | 1.686749  | 1.904154  | -0.449969 |
| O | 2.254743  | 2.217235  | -1.647308 |
| H | 1.519116  | 2.350517  | -2.270533 |
| C | 2.503940  | 1.595511  | 0.649968  |
| C | 1.870285  | 1.327830  | 1.870466  |
| H | 2.483931  | 1.118939  | 2.744457  |
| C | 0.479347  | 1.258723  | 1.984051  |
| H | 0.000309  | 0.986935  | 2.920886  |
| C | -0.307847 | 1.453229  | 0.850895  |
| O | -1.675846 | 1.215712  | 0.898483  |
| C | 0.284750  | 1.832387  | -0.360684 |
| O | -0.392642 | 2.036337  | -1.539688 |
| C | -1.462605 | 2.999891  | -1.525344 |
| H | -2.344796 | 2.603943  | -1.013560 |
| H | -1.136806 | 3.932307  | -1.044490 |
| H | -1.700798 | 3.193358  | -2.575945 |
| C | -2.962988 | -2.448102 | -0.640880 |
| H | -3.316188 | -3.383106 | -1.072231 |
| C | -1.654108 | -2.355690 | -0.152626 |
| C | -0.698506 | -3.535339 | -0.217645 |
| H | -1.197321 | -4.363351 | -0.735736 |
| H | -0.463480 | -3.892422 | 0.794742  |
| C | 0.641330  | -3.232366 | -0.927402 |
| H | 0.486958  | -2.615275 | -1.821310 |
| H | 1.080562  | -4.179504 | -1.280697 |
| C | 1.715078  | -2.608965 | -0.026479 |
| C | 2.639107  | -1.592571 | -0.682000 |
| H | 1.993437  | -0.740540 | -0.944802 |
| H | 2.971155  | -1.993955 | -1.652376 |
| C | 3.834124  | -1.130762 | 0.166983  |
| H | 3.514397  | -1.054773 | 1.213349  |
| C | 4.450783  | 0.208991  | -0.308628 |
| H | 5.545792  | 0.157741  | -0.234894 |
| C | 4.002615  | 1.463482  | 0.491778  |
| H | 4.416586  | 2.351982  | -0.004665 |
| H | 4.451741  | 1.421262  | 1.493320  |

|   |           |           |           |
|---|-----------|-----------|-----------|
| H | 4.225541  | 0.365868  | -1.371502 |
| H | 4.598945  | -1.918815 | 0.148433  |
| O | 1.807953  | -2.918724 | 1.146900  |
| C | -1.235036 | -1.130899 | 0.388077  |
| H | -0.234810 | -1.034748 | 0.795639  |
| C | -2.078901 | -0.020626 | 0.412681  |
| C | -3.399121 | -0.126141 | -0.062436 |
| O | -4.239531 | 0.962165  | -0.099839 |
| C | -4.728954 | 1.395254  | 1.173822  |
| H | -5.398102 | 2.238392  | 0.972996  |
| H | -3.913734 | 1.725106  | 1.829514  |
| H | -5.295494 | 0.592306  | 1.668065  |
| C | -3.826825 | -1.349485 | -0.579120 |
| H | -4.843653 | -1.415008 | -0.960081 |

Sum of electronic and zero-point Energies= -1190.335842  
Sum of electronic and thermal Energies= -1190.311559  
Sum of electronic and thermal Enthalpies= -1190.310614  
Sum of electronic and thermal Free Energies= -1190.389136

#### jucathanan-3-E2 (benzene)

|   |           |           |           |
|---|-----------|-----------|-----------|
| C | 2.021782  | 1.882993  | 0.284056  |
| O | 2.840860  | 2.235651  | 1.311127  |
| H | 2.259561  | 2.574367  | 2.014702  |
| C | 2.562688  | 1.382214  | -0.909558 |
| C | 1.667469  | 1.095894  | -1.951105 |
| H | 2.063314  | 0.751578  | -2.905356 |
| C | 0.287325  | 1.187841  | -1.782924 |
| H | -0.398908 | 0.913755  | -2.579929 |
| C | -0.234541 | 1.586137  | -0.548297 |
| O | -1.605583 | 1.542465  | -0.329385 |
| C | 0.627038  | 1.988709  | 0.475130  |
| O | 0.231340  | 2.514208  | 1.687102  |
| C | -0.456037 | 1.638790  | 2.597527  |
| H | -1.463963 | 1.405690  | 2.240568  |
| H | 0.108515  | 0.710379  | 2.755568  |
| H | -0.524728 | 2.188471  | 3.541737  |
| C | -3.282827 | -2.281009 | -0.118862 |
| H | -3.737152 | -3.269927 | -0.090899 |
| C | -1.944718 | -2.116230 | 0.260596  |
| C | -1.096812 | -3.288958 | 0.726048  |
| H | -1.677489 | -4.211637 | 0.606027  |
| H | -0.876712 | -3.193099 | 1.798592  |
| C | 0.250651  | -3.447290 | -0.013145 |
| H | 0.129263  | -3.307463 | -1.094706 |
| H | 0.611802  | -4.479989 | 0.122017  |
| C | 1.384102  | -2.556947 | 0.513106  |
| C | 2.389872  | -2.074964 | -0.521447 |
| H | 1.813529  | -1.432137 | -1.204381 |
| H | 2.692446  | -2.934602 | -1.140521 |
| C | 3.615489  | -1.321913 | 0.021253  |
| H | 3.305197  | -0.689690 | 0.861418  |
| C | 4.335201  | -0.470889 | -1.058973 |
| H | 5.422967  | -0.591340 | -0.963738 |
| C | 4.038293  | 1.054590  | -1.013045 |
| H | 4.467823  | 1.517779  | -1.913265 |
| H | 4.560092  | 1.492674  | -0.155851 |
| H | 4.081300  | -0.858308 | -2.056542 |
| H | 4.315962  | -2.053115 | 0.446103  |
| O | 1.455799  | -2.256399 | 1.690956  |
| C | -1.401811 | -0.825748 | 0.198542  |
| H | -0.371942 | -0.661558 | 0.493527  |
| C | -2.149201 | 0.266935  | -0.244657 |
| C | -3.500632 | 0.098997  | -0.601699 |
| O | -4.267120 | 1.125755  | -1.088653 |
| C | -4.560644 | 2.180042  | -0.166907 |
| H | -5.225842 | 2.869135  | -0.697444 |
| H | -3.654449 | 2.714781  | 0.141245  |
| H | -5.079302 | 1.790163  | 0.721839  |
| C | -4.048587 | -1.184370 | -0.526962 |
| H | -5.088263 | -1.308294 | -0.821950 |

Sum of electronic and zero-point Energies= -1190.330714  
Sum of electronic and thermal Energies= -1190.306356  
Sum of electronic and thermal Enthalpies= -1190.305412  
Sum of electronic and thermal Free Energies= -1190.384548

jugcathanin-4-TS (benzene)

|   |           |           |           |
|---|-----------|-----------|-----------|
| C | 1.181998  | 2.771454  | -0.196591 |
| O | 1.579790  | 4.045828  | -0.461193 |
| H | 0.797552  | 4.607705  | -0.318389 |
| C | 2.093634  | 1.703801  | -0.322805 |
| C | 1.560036  | 0.468644  | -0.025067 |
| H | 2.192067  | -0.386994 | -0.023393 |
| C | 0.252082  | 0.234234  | 0.285534  |
| H | -0.012746 | -0.790056 | 0.396143  |
| C | -0.660699 | 1.262123  | 0.451444  |
| O | -1.976853 | 0.995441  | 0.861502  |
| C | -0.172265 | 2.562754  | 0.214545  |
| O | -0.937873 | 3.711469  | 0.277153  |
| C | -1.556575 | 3.982344  | 1.543834  |
| H | -2.317284 | 3.229429  | 1.776500  |
| H | -0.807622 | 4.012340  | 2.348133  |
| H | -2.029268 | 4.964977  | 1.446195  |
| C | -2.306210 | -2.979405 | -0.236195 |
| H | -2.244899 | -3.968577 | -0.688691 |
| C | -1.428638 | -2.629057 | 0.798229  |
| C | -0.133729 | -3.403154 | 1.065323  |
| H | -0.336192 | -4.480404 | 1.115886  |
| H | 0.289156  | -3.113142 | 2.034417  |
| C | 0.974136  | -3.168093 | -0.038996 |
| H | 0.582772  | -2.580711 | -0.881852 |
| H | 1.251744  | -4.133633 | -0.489022 |
| C | 2.310124  | -2.525204 | 0.411318  |
| C | 3.434889  | -2.317326 | -0.654591 |
| H | 3.275222  | -3.054987 | -1.453291 |
| H | 4.354939  | -2.604921 | -0.128607 |
| C | 3.717731  | -0.944186 | -1.388377 |
| H | 4.492898  | -1.196881 | -2.124274 |
| C | 4.232622  | 0.285313  | -0.545592 |
| H | 4.183393  | 0.046884  | 0.525210  |
| C | 3.549471  | 1.679723  | -0.769136 |
| H | 4.140367  | 2.434558  | -0.230901 |
| H | 3.619684  | 1.958292  | -1.832838 |
| H | 5.299591  | 0.419467  | -0.766009 |
| H | 2.840050  | -0.666013 | -1.983232 |
| O | 2.528623  | -2.279814 | 1.581706  |
| C | -1.600236 | -1.350100 | 1.362421  |
| H | -0.956682 | -1.041007 | 2.182024  |
| C | -2.322349 | -0.357175 | 0.692072  |
| C | -3.195700 | -0.713862 | -0.353453 |
| O | -3.898924 | 0.291748  | -0.933213 |
| C | -4.731981 | -0.025204 | -2.040250 |
| H | -5.534169 | -0.722430 | -1.757867 |
| H | -4.154076 | -0.451152 | -2.873123 |
| H | -5.176350 | 0.922503  | -2.357805 |
| C | -3.232076 | -2.061915 | -0.750549 |
| H | -3.905837 | -2.376899 | -1.541543 |

Sum of electronic and zero-point Energies= -1190.259129  
Sum of electronic and thermal Energies= -1190.235980  
Sum of electronic and thermal Enthalpies= -1190.235036  
Sum of electronic and thermal Free Energies= -1190.310043

jugcathanin-4-E1 (benzene)

|   |           |          |           |
|---|-----------|----------|-----------|
| C | -1.494257 | 2.089449 | 0.425433  |
| O | -1.977589 | 2.393778 | 1.663326  |
| H | -1.199958 | 2.470543 | 2.243459  |
| C | -2.375734 | 1.822663 | -0.632979 |
| C | -1.817420 | 1.579807 | -1.896150 |
| H | -2.484534 | 1.406546 | -2.738885 |
| C | -0.440266 | 1.452768 | -2.083593 |
| H | -0.021955 | 1.175453 | -3.047526 |

|   |           |           |           |
|---|-----------|-----------|-----------|
| C | 0.408079  | 1.563679  | -0.982034 |
| O | 1.740402  | 1.190911  | -1.081322 |
| C | -0.103497 | 1.958808  | 0.258565  |
| O | 0.646434  | 2.094515  | 1.405150  |
| C | 1.751473  | 3.013729  | 1.345358  |
| H | 2.552020  | 2.624970  | 0.708776  |
| H | 1.420550  | 3.993431  | 0.973989  |
| H | 2.110498  | 3.114799  | 2.374520  |
| C | 2.649317  | -2.611675 | 0.376291  |
| H | 2.917999  | -3.589597 | 0.772756  |
| C | 1.342403  | -2.367807 | -0.049576 |
| C | 0.271492  | -3.443440 | 0.015905  |
| H | 0.721799  | -4.353349 | 0.431083  |
| H | -0.063127 | -3.693488 | -1.000416 |
| C | -0.982974 | -3.091601 | 0.847702  |
| H | -0.743847 | -2.405454 | 1.674061  |
| H | -1.374042 | -3.997149 | 1.339481  |
| C | -2.162865 | -2.512069 | 0.066614  |
| C | -3.394171 | -2.120914 | 0.884825  |
| H | -3.320727 | -2.552951 | 1.890879  |
| H | -4.278382 | -2.555691 | 0.398501  |
| C | -3.556086 | -0.580956 | 0.995675  |
| H | -4.192598 | -0.360197 | 1.863522  |
| C | -4.153519 | 0.083400  | -0.260165 |
| H | -3.765165 | -0.420492 | -1.153772 |
| C | -3.853226 | 1.602247  | -0.386674 |
| H | -4.436426 | 2.003394  | -1.226853 |
| H | -4.181122 | 2.131092  | 0.516048  |
| H | -5.243259 | -0.069846 | -0.262560 |
| H | -2.577638 | -0.143694 | 1.227821  |
| O | -2.135469 | -2.376130 | -1.143762 |
| C | 1.044481  | -1.090511 | -0.553701 |
| H | 0.043572  | -0.883221 | -0.916274 |
| C | 2.007868  | -0.087038 | -0.607400 |
| C | 3.330249  | -0.344083 | -0.184957 |
| O | 4.206006  | 0.697785  | -0.277213 |
| C | 5.547248  | 0.472941  | 0.130628  |
| H | 6.025451  | -0.316693 | -0.467122 |
| H | 5.609784  | 0.209649  | 1.196978  |
| H | 6.072789  | 1.417722  | -0.037280 |
| C | 3.636025  | -1.617597 | 0.301583  |
| H | 4.642315  | -1.843423 | 0.641288  |

Sum of electronic and zero-point Energies= -1190.335120  
Sum of electronic and thermal Energies= -1190.311087  
Sum of electronic and thermal Enthalpies= -1190.310143  
Sum of electronic and thermal Free Energies= -1190.387991

jugcathanin-4-E2 (benzene)

|   |           |           |           |
|---|-----------|-----------|-----------|
| C | -1.812771 | 2.002008  | -0.314112 |
| O | -2.585011 | 2.268045  | -1.401589 |
| H | -1.972513 | 2.409187  | -2.144443 |
| C | -2.417031 | 1.614031  | 0.893296  |
| C | -1.580702 | 1.397660  | 1.996920  |
| H | -2.031396 | 1.142901  | 2.954578  |
| C | -0.189342 | 1.412295  | 1.880110  |
| H | 0.453285  | 1.157847  | 2.718875  |
| C | 0.388127  | 1.657994  | 0.634697  |
| O | 1.745028  | 1.441191  | 0.444912  |
| C | -0.412852 | 2.031157  | -0.449268 |
| O | 0.061396  | 2.276115  | -1.717432 |
| C | 1.021673  | 3.337505  | -1.842465 |
| H | 0.616598  | 4.277685  | -1.442577 |
| H | 1.953795  | 3.086406  | -1.326063 |
| H | 1.210199  | 3.446194  | -2.915023 |
| C | 2.894308  | -2.494171 | -0.329483 |
| H | 3.228646  | -3.514928 | -0.508362 |
| C | 1.547966  | -2.163528 | -0.491260 |
| C | 0.528280  | -3.194238 | -0.946596 |
| H | 1.022750  | -4.172719 | -0.983425 |
| H | 0.211591  | -2.964950 | -1.973906 |

|   |           |           |           |
|---|-----------|-----------|-----------|
| C | -0.747597 | -3.318735 | -0.083969 |
| H | -0.552852 | -3.072946 | 0.970998  |
| H | -1.089400 | -4.366208 | -0.068687 |
| C | -1.952784 | -2.502409 | -0.053009 |
| C | -3.221126 | -2.607598 | 0.295717  |
| H | -3.133566 | -3.456056 | 0.986294  |
| H | -4.063507 | -2.812583 | -0.379424 |
| C | -3.499071 | -1.312774 | 1.105087  |
| H | -4.183899 | -1.562642 | 1.927956  |
| C | -4.091256 | -0.155961 | 0.277365  |
| H | -3.641831 | -0.149309 | -0.721935 |
| C | -3.883494 | 1.246085  | 0.915422  |
| H | -4.477227 | 1.978021  | 0.354221  |
| H | -4.255799 | 1.249448  | 1.949608  |
| H | -5.168065 | -0.330186 | 0.134360  |
| H | -2.561959 | -0.993794 | 1.580118  |
| O | -1.916227 | -1.811667 | -1.555505 |
| C | 1.165052  | -0.834656 | -0.243235 |
| H | 0.129510  | -0.547989 | -0.384362 |
| C | 2.087152  | 0.125856  | 0.163016  |
| C | 3.451525  | -0.211167 | 0.306213  |
| O | 4.283265  | 0.796376  | 0.691659  |
| C | 5.660401  | 0.492542  | 0.849503  |
| H | 6.111894  | 0.147567  | -0.092519 |
| H | 5.822944  | -0.266871 | 1.628750  |
| H | 6.139437  | 1.427511  | 1.155418  |
| C | 3.837892  | -1.530213 | 0.055254  |
| H | 4.877670  | -1.822176 | 0.167976  |

Sum of electronic and zero-point Energies= -1190.334566  
Sum of electronic and thermal Energies= -1190.310489  
Sum of electronic and thermal Enthalpies= -1190.309544  
Sum of electronic and thermal Free Energies= -1190.387877

#### jugcathanin-5-TS (benzene)

|   |           |           |           |
|---|-----------|-----------|-----------|
| C | 1.476519  | 2.658954  | -0.220028 |
| O | 1.988623  | 3.889019  | -0.495591 |
| H | 1.255099  | 4.518587  | -0.378415 |
| C | 2.288178  | 1.510634  | -0.304019 |
| C | 1.639900  | 0.336132  | 0.000484  |
| H | 2.219682  | -0.551304 | 0.061267  |
| C | 0.304971  | 0.212681  | 0.260358  |
| H | -0.059016 | -0.784283 | 0.361173  |
| C | -0.508264 | 1.325611  | 0.404379  |
| O | -1.845681 | 1.197875  | 0.806328  |
| C | 0.102209  | 2.574256  | 0.167933  |
| O | -0.562319 | 3.785973  | 0.209211  |
| C | -1.134966 | 4.138374  | 1.477608  |
| H | -0.373477 | 4.122797  | 2.270519  |
| H | -1.523908 | 5.155351  | 1.362938  |
| H | -1.953304 | 3.458884  | 1.739384  |
| C | -2.642779 | -2.758572 | -0.121361 |
| H | -2.715204 | -3.766731 | -0.528053 |
| C | -1.692240 | -2.471008 | 0.867739  |
| C | -0.497989 | -3.393723 | 1.130447  |
| H | -0.840067 | -4.427111 | 1.267784  |
| H | 0.019097  | -3.107928 | 2.054498  |
| C | 0.549887  | -3.384029 | -0.055386 |
| H | 0.099532  | -2.959424 | -0.960431 |
| H | 0.787756  | -4.427543 | -0.316975 |
| C | 1.938720  | -2.729704 | 0.181736  |
| C | 2.688409  | -2.243022 | -1.085641 |
| H | 1.968998  | -1.709791 | -1.719389 |
| H | 2.919668  | -3.163777 | -1.649706 |
| C | 4.047227  | -1.458017 | -0.984861 |
| H | 4.768090  | -2.147868 | -0.524858 |
| C | 4.327993  | -0.079740 | -0.261044 |
| H | 4.145298  | -0.200465 | 0.814612  |
| C | 3.743278  | 1.311733  | -0.704543 |
| H | 3.852946  | 1.432139  | -1.794506 |
| H | 4.383848  | 2.086764  | -0.260607 |

|   |           |           |           |
|---|-----------|-----------|-----------|
| H | 5.418096  | 0.024633  | -0.358102 |
| H | 4.373988  | -1.348676 | -2.029611 |
| O | 2.425867  | -2.661423 | 1.292528  |
| C | -1.693346 | -1.159478 | 1.377734  |
| H | -0.996753 | -0.896498 | 2.169092  |
| C | -2.324769 | -0.117236 | 0.689927  |
| C | -3.269969 | -0.412109 | -0.311128 |
| O | -3.878048 | 0.643277  | -0.909452 |
| C | -4.785200 | 0.379275  | -1.971345 |
| H | -5.650759 | -0.206570 | -1.629278 |
| H | -5.129596 | 1.358216  | -2.317094 |
| H | -4.293720 | -0.145872 | -2.803097 |
| C | -3.473748 | -1.761585 | -0.647885 |
| H | -4.207955 | -2.027860 | -1.401946 |

Sum of electronic and zero-point Energies= -1190.258218  
Sum of electronic and thermal Energies= -1190.234966  
Sum of electronic and thermal Enthalpies= -1190.234022  
Sum of electronic and thermal Free Energies= -1190.309636

#### jugcathanin-5-E1 (benzene)

|   |           |           |           |
|---|-----------|-----------|-----------|
| C | -1.566628 | 1.849728  | 0.495800  |
| O | -2.077711 | 1.989579  | 1.753494  |
| H | -1.310469 | 2.068561  | 2.347397  |
| C | -2.421091 | 1.644855  | -0.596603 |
| C | -1.833314 | 1.628750  | -1.866945 |
| H | -2.479777 | 1.431261  | -2.734856 |
| C | -0.449476 | 1.511027  | -2.042351 |
| H | -0.005440 | 1.344050  | -3.020152 |
| C | 0.380001  | 1.575782  | -0.923093 |
| O | 1.731735  | 1.282411  | -1.035185 |
| C | -0.168898 | 1.820748  | 0.340151  |
| O | 0.558089  | 1.890694  | 1.507134  |
| C | 1.615017  | 2.865782  | 1.549514  |
| H | 1.237306  | 3.858255  | 1.267634  |
| H | 1.959654  | 2.886257  | 2.588138  |
| H | 2.440097  | 2.581305  | 0.889376  |
| C | 2.780186  | -2.540445 | 0.272142  |
| H | 3.079762  | -3.518978 | 0.644145  |
| C | 1.454980  | -2.310924 | -0.100498 |
| C | 0.378861  | -3.374706 | 0.026148  |
| H | 0.831328  | -4.289069 | 0.429187  |
| H | -0.025755 | -3.630608 | -0.962937 |
| C | -0.809637 | -2.964093 | 0.926144  |
| H | -0.472729 | -2.373853 | 1.788434  |
| H | -1.274190 | -3.869583 | 1.351541  |
| C | -1.963100 | -2.240008 | 0.217700  |
| C | -2.858419 | -1.395734 | 1.115902  |
| H | -2.281101 | -0.507082 | 1.407742  |
| H | -2.991064 | -1.952845 | 2.056947  |
| C | -4.245259 | -1.008400 | 0.568959  |
| H | -4.767200 | -1.934920 | 0.288538  |
| C | -4.360121 | -0.040854 | -0.628563 |
| H | -3.832372 | -0.463980 | -1.490642 |
| C | -3.910435 | 1.432821  | -0.418074 |
| H | -4.231198 | 1.786561  | 0.568933  |
| H | -4.441412 | 2.048586  | -1.157898 |
| H | -5.426105 | -0.017509 | -0.899445 |
| H | -4.814625 | -0.585647 | 1.410298  |
| O | -2.162201 | -2.377046 | -0.975628 |
| C | 1.121002  | -1.032014 | -0.572875 |
| H | 0.106001  | -0.834761 | -0.897725 |
| C | 2.056646  | -0.004421 | -0.626408 |
| C | 3.397328  | -0.243715 | -0.255462 |
| O | 4.245251  | 0.821037  | -0.341179 |
| C | 5.604385  | 0.614858  | 0.014376  |
| H | 6.080085  | -0.142012 | -0.626197 |
| H | 6.102114  | 1.577256  | -0.137286 |
| H | 5.708676  | 0.316511  | 1.068119  |
| C | 3.744711  | -1.524892 | 0.182464  |
| H | 4.766675  | -1.738162 | 0.481078  |



Sum of electronic and zero-point Energies= -1190.334779  
Sum of electronic and thermal Energies= -1190.310815  
Sum of electronic and thermal Enthalpies= -1190.309871  
Sum of electronic and thermal Free Energies= -1190.387383

jugcathanin-5-E2 (benzene)

|   |           |           |           |
|---|-----------|-----------|-----------|
| C | -1.720986 | -1.937898 | 0.361799  |
| O | -2.375786 | -2.266204 | 1.507425  |
| H | -1.689756 | -2.444265 | 2.174191  |
| C | -2.449931 | -1.512923 | -0.762027 |
| C | -1.733594 | -1.260734 | -1.939673 |
| H | -2.282662 | -0.984185 | -2.838355 |
| C | -0.336566 | -1.274156 | -1.970356 |
| H | 0.214426  | -0.989729 | -2.863028 |
| C | 0.368634  | -1.559204 | -0.801319 |
| O | 1.736242  | -1.333681 | -0.739798 |
| C | -0.315143 | -1.964901 | 0.349561  |
| O | 0.285449  | -2.255907 | 1.551723  |
| C | 1.286131  | -3.287818 | 1.537485  |
| H | 2.168118  | -2.972973 | 0.971003  |
| H | 1.557065  | -3.454777 | 2.584511  |
| H | 0.880974  | -4.215165 | 1.109204  |
| C | 2.914207  | 2.479537  | 0.484786  |
| H | 3.257626  | 3.469028  | 0.782503  |
| C | 1.548403  | 2.195441  | 0.449567  |
| C | 0.499402  | 3.225230  | 0.835634  |
| H | 0.971987  | 4.215056  | 0.856897  |
| H | 0.138555  | 3.031474  | 1.856317  |
| C | -0.735698 | 3.273627  | -0.090176 |
| H | -0.459417 | 3.096440  | -1.137676 |
| H | -1.165840 | 4.288588  | -0.065146 |
| C | -1.901983 | 2.356648  | 0.307210  |
| C | -2.830530 | 1.947736  | -0.830076 |
| H | -2.260834 | 1.248243  | -1.458799 |
| H | -2.976191 | 2.835950  | -1.465203 |
| C | -4.205811 | 1.371551  | -0.443306 |
| H | -4.692257 | 2.090662  | 0.231405  |
| C | -4.290348 | -0.016291 | 0.227798  |
| H | -3.686530 | -0.024376 | 1.140407  |
| C | -3.936057 | -1.257958 | -0.638583 |
| H | -4.375071 | -1.151616 | -1.640882 |
| H | -4.416436 | -2.130964 | -0.176311 |
| H | -5.334485 | -0.139201 | 0.551207  |
| H | -4.820167 | 1.355819  | -1.356770 |
| O | -2.082068 | 2.021915  | 1.462967  |
| C | 1.160169  | 0.907745  | 0.049019  |
| H | 0.107912  | 0.654615  | 0.025911  |
| C | 2.089859  | -0.062936 | -0.309630 |
| C | 3.471220  | 0.225101  | -0.255416 |
| O | 4.310869  | -0.788667 | -0.607192 |
| C | 5.706717  | -0.534258 | -0.567901 |
| H | 6.044491  | -0.275225 | 0.446501  |
| H | 6.189087  | -1.465455 | -0.879872 |
| H | 5.993024  | 0.269833  | -1.261882 |
| C | 3.865011  | 1.505421  | 0.143559  |
| H | 4.920102  | 1.758810  | 0.185134  |

Sum of electronic and zero-point Energies= -1190.334091  
Sum of electronic and thermal Energies= -1190.310064  
Sum of electronic and thermal Enthalpies= -1190.309120  
Sum of electronic and thermal Free Energies= -1190.387033

jugcathanin-6-TS (benzene)

|   |           |           |           |
|---|-----------|-----------|-----------|
| C | -0.983788 | 2.863266  | -0.105042 |
| O | -1.271672 | 4.183935  | 0.054829  |
| H | -0.467642 | 4.668417  | -0.203705 |
| C | -1.976768 | 1.888405  | 0.120944  |
| C | -1.549674 | 0.592611  | -0.074203 |
| H | -2.249389 | -0.204916 | 0.004495  |
| C | -0.273547 | 0.226186  | -0.389981 |
| H | -0.095341 | -0.822024 | -0.424891 |

|   |           |           |           |
|---|-----------|-----------|-----------|
| C | 0.707739  | 1.159863  | -0.676825 |
| O | 1.978373  | 0.756343  | -1.117581 |
| C | 0.337882  | 2.510443  | -0.522249 |
| O | 1.172577  | 3.580883  | -0.780297 |
| C | 2.373859  | 3.628953  | 0.007620  |
| H | 3.000445  | 2.750194  | -0.177044 |
| H | 2.902581  | 4.535792  | -0.303146 |
| H | 2.134197  | 3.691405  | 1.079117  |
| C | 2.051922  | -3.113018 | 0.340446  |
| H | 1.934518  | -4.049395 | 0.884784  |
| C | 1.165184  | -2.791245 | -0.695528 |
| C | -0.192939 | -3.482995 | -0.850808 |
| H | -0.074068 | -4.572697 | -0.802464 |
| H | -0.625740 | -3.253279 | -1.831575 |
| C | -1.241545 | -3.058610 | 0.254959  |
| H | -1.575379 | -3.952318 | 0.804070  |
| H | -0.778580 | -2.425695 | 1.025600  |
| C | -2.539632 | -2.358093 | -0.220584 |
| C | -3.612188 | -1.966848 | 0.847701  |
| H | -3.483792 | -2.638856 | 1.707695  |
| H | -4.566826 | -2.229200 | 0.372675  |
| C | -3.768723 | -0.514540 | 1.456364  |
| H | -4.539306 | -0.637877 | 2.229233  |
| C | -4.212533 | 0.670346  | 0.514869  |
| H | -4.212999 | 0.333252  | -0.530201 |
| C | -3.418293 | 2.020966  | 0.593901  |
| H | -3.962143 | 2.767553  | -0.002300 |
| H | -3.440328 | 2.400889  | 1.627938  |
| H | -5.259207 | 0.907670  | 0.745379  |
| H | -2.855813 | -0.252885 | 2.003752  |
| O | -2.775406 | -2.204149 | -1.403080 |
| C | 1.410915  | -1.586886 | -1.382733 |
| H | 0.763700  | -1.304289 | -2.209011 |
| C | 2.229734  | -0.596522 | -0.830334 |
| C | 3.110061  | -0.922469 | 0.218579  |
| O | 3.905331  | 0.077463  | 0.683650  |
| C | 4.763126  | -0.205857 | 1.781384  |
| H | 4.194143  | -0.510866 | 2.671532  |
| H | 5.292277  | 0.727572  | 1.993971  |
| H | 5.496399  | -0.985945 | 1.531283  |
| C | 3.061836  | -2.226931 | 0.739338  |
| H | 3.738914  | -2.520448 | 1.535746  |

Sum of electronic and zero-point Energies= -1190.259703  
Sum of electronic and thermal Energies= -1190.236631  
Sum of electronic and thermal Enthalpies= -1190.235687  
Sum of electronic and thermal Free Energies= -1190.310335

jugcathanin-6-E1 (benzene)

|   |           |           |           |
|---|-----------|-----------|-----------|
| C | -1.812533 | 2.001831  | -0.314561 |
| O | -2.584491 | 2.267500  | -1.402323 |
| H | -1.971814 | 2.408248  | -2.145099 |
| C | -2.417115 | 1.614361  | 0.892850  |
| C | -1.581068 | 1.398406  | 1.996776  |
| H | -2.032024 | 1.144087  | 2.954424  |
| C | -0.189678 | 1.412947  | 1.880308  |
| H | 0.452746  | 1.158762  | 2.719306  |
| C | 0.388104  | 1.658055  | 0.634920  |
| O | 1.745047  | 1.441084  | 0.445584  |
| C | -0.412585 | 2.030853  | -0.449379 |
| O | 0.062016  | 2.275241  | -1.717529 |
| C | 1.022441  | 3.336483  | -1.842706 |
| H | 1.954282  | 3.085634  | -1.325674 |
| H | 1.211535  | 3.444519  | -2.915229 |
| H | 0.617228  | 4.276937  | -1.443592 |
| C | 2.894250  | -2.494125 | -0.329697 |
| H | 3.228590  | -3.514840 | -0.508802 |
| C | 1.547847  | -2.163520 | -0.491026 |
| C | 0.528103  | -3.194250 | -0.946194 |
| H | 1.022527  | -4.172762 | -0.982850 |
| H | 0.211448  | -2.965128 | -1.973554 |

|   |           |           |           |
|---|-----------|-----------|-----------|
| C | -0.747804 | -3.318610 | -0.083605 |
| H | -1.089721 | -4.366060 | -0.068466 |
| H | -0.553056 | -3.072973 | 0.971392  |
| C | -1.952924 | -2.502196 | -0.552651 |
| C | -3.221275 | -2.607315 | 0.296062  |
| H | -3.133624 | -3.455600 | 0.986844  |
| H | -4.063590 | -2.812604 | -0.379073 |
| C | -3.499607 | -1.312394 | 1.105134  |
| H | -4.184840 | -1.562248 | 1.927666  |
| C | -4.091439 | -0.155646 | 0.277022  |
| H | -3.641782 | -0.149296 | -0.722167 |
| C | -3.883607 | 1.246513  | 0.914799  |
| H | -4.477188 | 1.978377  | 0.353334  |
| H | -4.256091 | 1.250159  | 1.948918  |
| H | -5.168244 | -0.329737 | 0.133829  |
| H | -2.562740 | -0.993373 | 1.580611  |
| O | -1.916301 | -1.811481 | -1.555162 |
| C | 1.164933  | -0.834692 | -0.242726 |
| H | 0.129323  | -0.548091 | -0.383475 |
| C | 2.087115  | 0.125811  | 0.163334  |
| C | 3.451556  | -0.211163 | 0.306050  |
| O | 4.283389  | 0.796408  | 0.691223  |
| C | 5.660366  | 0.492282  | 0.849907  |
| H | 5.822236  | -0.267345 | 1.629082  |
| H | 6.139371  | 1.427096  | 1.156341  |
| H | 6.112433  | 0.147445  | -0.091893 |
| C | 3.837913  | -1.530154 | 0.054824  |
| H | 4.877752  | -1.822065 | 0.167133  |

Sum of electronic and zero-point Energies= -1190.334564

Sum of electronic and thermal Energies= -1190.310488

Sum of electronic and thermal Enthalpies= -1190.309544

Sum of electronic and thermal Free Energies= -1190.387867

#### jugcathanin-6-E2 (benzene)

|   |           |           |           |
|---|-----------|-----------|-----------|
| C | -1.771996 | -2.154076 | -0.264589 |
| O | -2.418394 | -2.582245 | -1.386185 |
| H | -1.724531 | -2.843755 | -2.015651 |
| C | -2.505326 | -1.645821 | 0.813760  |
| C | -1.796454 | -1.279879 | 1.967989  |
| H | -2.347296 | -0.920997 | 2.835345  |
| C | -0.405790 | -1.273175 | 1.991849  |
| H | 0.142558  | -0.906239 | 2.855536  |
| C | 0.315034  | -1.637637 | 0.850555  |
| O | 1.682810  | -1.396356 | 0.806049  |
| C | -0.357418 | -2.155540 | -0.263337 |
| O | 0.180824  | -2.682742 | -1.412068 |
| C | 1.416300  | -2.195406 | -1.951965 |
| H | 2.265568  | -2.472189 | -1.321269 |
| H | 1.509787  | -2.675665 | -2.931163 |
| H | 1.387255  | -1.106461 | -2.082332 |
| C | 2.911074  | 2.443182  | -0.277272 |
| H | 3.269053  | 3.426750  | -0.577375 |
| C | 1.550725  | 2.237586  | -0.043533 |
| C | 0.544755  | 3.369959  | -0.171283 |
| H | 1.047455  | 4.224711  | -0.640192 |
| H | 0.238337  | 3.699950  | 0.831633  |
| C | -0.741240 | 3.052210  | -0.966246 |
| H | -1.069109 | 3.945305  | -1.522248 |
| H | -0.566559 | 2.290177  | -1.740753 |
| C | -1.950650 | 2.625039  | -0.131824 |
| C | -3.223461 | 2.268501  | -0.902132 |
| H | -3.130857 | 2.606415  | -1.942174 |
| H | -4.058059 | 2.819468  | -0.446579 |
| C | -3.526562 | 0.745902  | -0.881403 |
| H | -4.214390 | 0.519892  | -1.707813 |
| C | -4.128524 | 0.235979  | 0.442488  |
| H | -3.652092 | 0.761127  | 1.279205  |
| C | -3.970572 | -1.292638 | 0.669733  |
| H | -4.516650 | -1.565796 | 1.583288  |
| H | -4.424570 | -1.850599 | -0.157077 |

|   |           |           |           |
|---|-----------|-----------|-----------|
| H | -5.196945 | 0.497230  | 0.476246  |
| H | -2.600701 | 0.202695  | -1.108778 |
| O | -1.911457 | 2.584339  | 1.084704  |
| C | 1.136946  | 0.950024  | 0.339112  |
| H | 0.089293  | 0.773561  | 0.550513  |
| C | 2.044264  | -0.098886 | 0.474704  |
| C | 3.421039  | 0.119603  | 0.240424  |
| O | 4.232443  | -0.966233 | 0.380998  |
| C | 5.625819  | -0.782139 | 0.180068  |
| H | 5.850099  | -0.458893 | -0.847367 |
| H | 6.084431  | -1.759666 | 0.356413  |
| H | 6.044768  | -0.053564 | 0.889451  |
| C | 3.837810  | 1.400227  | -0.130728 |
| H | 4.888703  | 1.594346  | -0.323066 |

Sum of electronic and zero-point Energies= -1190.330054

Sum of electronic and thermal Energies= -1190.306433

Sum of electronic and thermal Enthalpies= -1190.305489

Sum of electronic and thermal Free Energies= -1190.381746

#### jugcathanin-7-TS (benzene)

|   |           |           |           |
|---|-----------|-----------|-----------|
| C | -0.323670 | -2.977038 | -0.153386 |
| O | -0.306870 | -4.311386 | 0.115905  |
| H | 0.594127  | -4.616240 | -0.092559 |
| C | -1.500217 | -2.228090 | 0.048687  |
| C | -1.381667 | -0.892114 | -0.271376 |
| H | -2.213979 | -0.240890 | -0.142521 |
| C | -0.239702 | -0.298515 | -0.715708 |
| H | -0.297877 | 0.753787  | -0.846094 |
| C | 0.941421  | -0.994076 | -0.897041 |
| O | 2.096178  | -0.302405 | -1.312091 |
| C | 0.890732  | -2.373081 | -0.616459 |
| O | 1.946762  | -3.249681 | -0.769715 |
| C | 3.127207  | -2.940387 | -0.008583 |
| H | 2.899218  | -2.911536 | 1.066555  |
| H | 3.835682  | -3.749778 | -0.212315 |
| H | 3.553134  | -1.980947 | -0.316637 |
| C | 1.138760  | 3.300308  | 0.452378  |
| H | 0.733756  | 4.108458  | 1.058313  |
| C | 0.502860  | 2.947406  | -0.742889 |
| C | -0.890749 | 3.482323  | -1.085447 |
| H | -0.895457 | 3.887862  | -2.107978 |
| H | -1.107619 | 4.326434  | -0.419213 |
| C | -2.122972 | 2.501440  | -1.031977 |
| H | -1.996785 | 1.666430  | -1.736703 |
| H | -2.982874 | 3.059470  | -1.434390 |
| C | -2.579960 | 1.927463  | 0.329699  |
| C | -3.971912 | 1.206437  | 0.432110  |
| H | -4.653016 | 1.742342  | -0.244892 |
| H | -4.297019 | 1.428677  | 1.456505  |
| C | -4.248443 | -0.331548 | 0.179582  |
| H | -5.343031 | -0.405709 | 0.231515  |
| C | -3.648829 | -1.390446 | 1.185345  |
| H | -3.002950 | -0.879542 | 1.911650  |
| C | -2.855424 | -2.622131 | 0.619911  |
| H | -3.464369 | -3.139315 | -0.139159 |
| H | -2.730976 | -3.345180 | 1.437557  |
| H | -4.485131 | -1.798192 | 1.767923  |
| H | -4.001494 | -0.589743 | -0.857556 |
| O | -1.942117 | 2.139908  | 1.341690  |
| C | 1.094083  | 1.906726  | -1.487769 |
| H | 0.644953  | 1.589558  | -2.427097 |
| C | 2.029505  | 1.045872  | -0.900129 |
| C | 2.666594  | 1.416633  | 0.299239  |
| O | 3.591298  | 0.550785  | 0.793832  |
| C | 4.178302  | 0.849398  | 2.054105  |
| H | 3.420501  | 0.911055  | 2.848091  |
| H | 4.751720  | 1.786934  | 2.021705  |
| H | 4.860038  | 0.021156  | 2.268268  |
| C | 2.256126  | 2.602644  | 0.926387  |
| H | 2.725184  | 2.921806  | 1.851981  |

Sum of electronic and zero-point Energies= -1190.255579  
Sum of electronic and thermal Energies= -1190.232475  
Sum of electronic and thermal Enthalpies= -1190.231531  
Sum of electronic and thermal Free Energies= -1190.306376

jugcathanin-7-E1 (benzene)

|   |           |           |           |
|---|-----------|-----------|-----------|
| C | -1.494928 | -2.089347 | -0.425152 |
| O | -1.978673 | -2.393711 | -1.662890 |
| H | -1.201211 | -2.470912 | -2.243174 |
| C | -2.376043 | -1.822114 | 0.633418  |
| C | -1.817366 | -1.578910 | 1.896368  |
| H | -2.484260 | -1.405231 | 2.739190  |
| C | -0.440139 | -1.452152 | 2.083420  |
| H | -0.021483 | -1.174485 | 3.047099  |
| C | 0.407883  | -1.563673 | 0.981662  |
| O | 1.740338  | -1.191276 | 1.080493  |
| C | -0.104077 | -1.959043 | -0.258690 |
| O | 0.645530  | -2.095388 | -1.405394 |
| C | 1.750537  | -3.014652 | -1.345513 |
| H | 1.419815  | -3.993932 | -0.972873 |
| H | 2.108758  | -3.116783 | -2.374842 |
| H | 2.551586  | -2.625323 | -0.709914 |
| C | 2.649858  | 2.611454  | -0.376364 |
| H | 2.918720  | 3.589425  | -0.772584 |
| C | 1.342822  | 2.367631  | 0.049187  |
| C | 0.272056  | 3.443405  | -0.016265 |
| H | 0.722426  | 4.353196  | -0.431649 |
| H | -0.062339 | 3.693640  | 1.000086  |
| C | -0.982597 | 3.091768  | -0.847840 |
| H | -0.743630 | 2.405872  | -1.674458 |
| H | -1.373728 | 3.997470  | -1.339332 |
| C | -2.162373 | 2.512183  | -0.066701 |
| C | -3.393914 | 2.121292  | -0.884694 |
| H | -3.320665 | 2.553341  | -1.890756 |
| H | -4.277942 | 2.556196  | -0.398149 |
| C | -3.556078 | 0.581332  | -0.995412 |
| H | -4.192592 | 0.360538  | -1.863241 |
| C | -4.153587 | -0.082675 | 0.260591  |
| H | -3.765031 | 0.421295  | 1.154064  |
| C | -3.853564 | -1.601561 | 0.387394  |
| H | -4.181695 | -2.130566 | -0.515141 |
| H | -4.436658 | -2.002397 | 1.227792  |
| H | -5.243291 | 0.070839  | 0.263033  |
| H | -2.577704 | 0.143858  | -1.227456 |
| O | -2.134744 | 2.375951  | 1.143641  |
| C | 1.044679  | 1.090273  | 0.552989  |
| H | 0.043689  | 0.882973  | 0.915315  |
| C | 2.008007  | 0.086731  | 0.606827  |
| C | 3.330490  | 0.343696  | 0.184685  |
| O | 4.206129  | -0.698256 | 0.276846  |
| C | 5.547858  | -0.472965 | -0.129333 |
| H | 6.025029  | 0.316731  | 0.469138  |
| H | 5.611598  | -0.209491 | -1.195556 |
| H | 6.073400  | -1.417639 | 0.039078  |
| C | 3.636438  | 1.617290  | -0.301598 |
| H | 4.642809  | 1.843060  | -0.641116 |

Sum of electronic and zero-point Energies= -1190.335119  
Sum of electronic and thermal Energies= -1190.311086  
Sum of electronic and thermal Enthalpies= -1190.310142  
Sum of electronic and thermal Free Energies= -1190.387988

jugcathanin-7-E2 (benzene)

|   |           |           |           |
|---|-----------|-----------|-----------|
| C | -1.812917 | -2.001733 | 0.314351  |
| O | -2.585149 | -2.267385 | 1.401914  |
| H | -1.972647 | -2.408056 | 2.144858  |
| C | -2.417201 | -1.614078 | -0.893176 |
| C | -1.580885 | -1.398146 | -1.996877 |
| H | -2.031565 | -1.143651 | -2.954611 |
| C | -0.189506 | -1.412842 | -1.880105 |
| H | 0.453096  | -1.158707 | -2.718985 |

|   |           |           |           |
|---|-----------|-----------|-----------|
| C | 0.387983  | -1.658093 | -0.634620 |
| O | 1.744910  | -1.441342 | -0.444997 |
| C | -0.413022 | -2.030855 | 0.449469  |
| O | 0.061369  | -2.275281 | 1.717712  |
| C | 1.021102  | -3.337122 | 1.843002  |
| H | 1.953183  | -3.086828 | 1.326108  |
| H | 1.210026  | -3.445322 | 2.915547  |
| H | 0.615389  | -4.277331 | 1.443811  |
| C | 2.894522  | 2.493915  | 0.329580  |
| H | 3.228935  | 3.514646  | 0.508459  |
| C | 1.548190  | 2.163327  | 0.491510  |
| C | 0.528547  | 3.194056  | 0.946907  |
| H | 1.023106  | 4.172477  | 0.984071  |
| H | 0.211612  | 2.964543  | 1.974084  |
| C | -0.747148 | 3.318820  | 0.084027  |
| H | -0.552197 | 3.073239  | -0.970945 |
| H | -1.088890 | 4.366313  | 0.068913  |
| C | -1.952461 | 2.502457  | 0.552659  |
| C | -3.220600 | 2.607761  | -0.296351 |
| H | -3.132586 | 3.455942  | -0.987216 |
| H | -4.062997 | 2.813398  | 0.378587  |
| C | -3.499001 | 1.312857  | -1.105380 |
| H | -4.183950 | 1.562795  | -1.928130 |
| C | -4.091285 | 0.156198  | -0.277496 |
| H | -3.641881 | 0.149653  | 0.721807  |
| C | -3.883613 | -1.245941 | -0.915388 |
| H | -4.255872 | -1.249387 | -1.949588 |
| H | -4.477468 | -1.977748 | -0.354138 |
| H | -5.168090 | 0.330482  | -0.134566 |
| H | -2.562047 | 0.993664  | -1.580574 |
| O | -1.916170 | 1.811604  | 1.555105  |
| C | 1.165159  | 0.834473  | 0.243490  |
| H | 0.129597  | 0.547932  | 0.384730  |
| C | 2.087142  | -0.126068 | -0.162931 |
| C | 3.451518  | 0.210903  | -0.306240 |
| O | 4.283180  | -0.796673 | -0.691803 |
| C | 5.660215  | -0.492821 | -0.850107 |
| H | 6.112086  | -0.147901 | 0.091765  |
| H | 5.822520  | 0.266632  | -1.629377 |
| H | 6.139201  | -1.427757 | -1.156239 |
| C | 3.838013  | 1.529902  | -0.055281 |
| H | 4.877805  | 1.821779  | -0.168093 |

Sum of electronic and zero-point Energies= -1190.334565  
Sum of electronic and thermal Energies= -1190.310489  
Sum of electronic and thermal Enthalpies= -1190.309545  
Sum of electronic and thermal Free Energies= -1190.387872

jugcathanin-8-TS (benzene)

|   |           |           |           |
|---|-----------|-----------|-----------|
| C | -0.814784 | 2.893504  | 0.176885  |
| O | -0.997738 | 4.236247  | 0.049103  |
| H | -0.143722 | 4.648521  | 0.269203  |
| C | -1.893261 | 2.004785  | 0.001421  |
| C | -1.567378 | 0.676666  | 0.168515  |
| H | -2.341811 | -0.045727 | 0.094142  |
| C | -0.319560 | 0.195342  | 0.447700  |
| H | -0.235072 | -0.865275 | 0.507356  |
| C | 0.757597  | 1.045737  | 0.634815  |
| O | 2.031825  | 0.549106  | 0.955693  |
| C | 0.497546  | 2.421018  | 0.485625  |
| O | 1.468838  | 3.395412  | 0.634487  |
| C | 2.409464  | 3.451223  | -0.451912 |
| H | 3.159966  | 4.197060  | -0.170487 |
| H | 2.890074  | 2.478835  | -0.606082 |
| H | 1.914259  | 3.760955  | -1.383743 |
| C | 1.842573  | -3.245342 | -0.698602 |
| H | 1.649776  | -4.149643 | -1.274418 |
| C | 1.048707  | -2.946898 | 0.421218  |
| C | -0.291683 | -3.645110 | 0.663127  |
| H | -0.642296 | -3.464991 | 1.686272  |
| H | -0.176664 | -4.730242 | 0.549996  |

|   |           |           |           |
|---|-----------|-----------|-----------|
| C | -1.413559 | -3.166864 | -0.337661 |
| H | -1.922723 | -4.049638 | -0.756422 |
| H | -0.968708 | -2.662641 | -1.204898 |
| C | -2.551586 | -2.275943 | 0.219470  |
| C | -3.483997 | -1.595852 | -0.826160 |
| H | -4.176749 | -2.397371 | -1.129567 |
| H | -2.899425 | -1.370941 | -1.727503 |
| C | -4.329160 | -0.341340 | -0.376379 |
| H | -5.380076 | -0.582951 | -0.575051 |
| C | -4.036558 | 1.040097  | -1.097634 |
| H | -3.463910 | 0.841905  | -2.015312 |
| C | -3.351100 | 2.248503  | -0.359460 |
| H | -3.444651 | 3.123062  | -1.017409 |
| H | -3.929347 | 2.498184  | 0.544737  |
| H | -5.006918 | 1.425840  | -1.436807 |
| H | -4.260926 | -0.242750 | 0.714707  |
| O | -2.744673 | -2.162218 | 1.412567  |
| C | 1.374158  | -1.787965 | 1.146097  |
| H | 0.807574  | -1.539455 | 2.039467  |
| C | 2.192117  | -0.796331 | 0.583328  |
| C | 2.997278  | -1.110480 | -0.522444 |
| O | 3.836108  | -0.195835 | -1.103582 |
| C | 4.884898  | 0.291529  | -0.257697 |
| H | 4.488973  | 0.828465  | 0.612816  |
| H | 5.476896  | 0.977352  | -0.872242 |
| H | 5.525414  | -0.535735 | 0.081064  |
| C | 2.855181  | -2.374941 | -1.111755 |
| H | 3.483823  | -2.612556 | -1.966951 |

Sum of electronic and zero-point Energies= -1190.264450  
Sum of electronic and thermal Energies= -1190.240973  
Sum of electronic and thermal Enthalpies= -1190.240028  
Sum of electronic and thermal Free Energies= -1190.315993

#### jugcathanin-8-E1 (benzene)

|   |           |           |           |
|---|-----------|-----------|-----------|
| C | 1.920145  | 1.986654  | 0.300425  |
| O | 2.631124  | 2.455495  | 1.362850  |
| H | 1.978400  | 2.781584  | 2.006354  |
| C | 2.597088  | 1.419435  | -0.788574 |
| C | 1.828856  | 1.003684  | -1.884704 |
| H | 2.333319  | 0.599294  | -2.759615 |
| C | 0.436616  | 1.045161  | -1.857328 |
| H | -0.154514 | 0.665724  | -2.686662 |
| C | -0.225171 | 1.507476  | -0.717859 |
| O | -1.609428 | 1.400732  | -0.635214 |
| C | 0.509092  | 2.034684  | 0.354125  |
| O | 0.023304  | 2.641042  | 1.485641  |
| C | -1.161609 | 2.150746  | 2.130904  |
| H | -1.185208 | 2.646401  | 3.106427  |
| H | -2.060682 | 2.408822  | 1.564391  |
| H | -1.109984 | 1.064338  | 2.276105  |
| C | -3.230142 | -2.288499 | 0.479767  |
| H | -3.678313 | -3.227159 | 0.800865  |
| C | -1.856968 | -2.222753 | 0.216237  |
| C | -0.959279 | -3.440947 | 0.363349  |
| H | -0.753041 | -3.880206 | -0.623411 |
| H | -1.498134 | -4.205369 | 0.936437  |
| C | 0.401911  | -3.165573 | 1.041309  |
| H | 0.781335  | -4.106428 | 1.471413  |
| H | 0.294678  | -2.468449 | 1.881813  |
| C | 1.510540  | -2.692521 | 0.090755  |
| C | 2.494474  | -1.673688 | 0.652401  |
| H | 2.784456  | -1.988207 | 1.667244  |
| H | 1.908296  | -0.753941 | 0.805106  |
| C | 3.731234  | -1.392489 | -0.215152 |
| H | 4.424514  | -2.238416 | -0.113090 |
| C | 4.463546  | -0.075560 | 0.145172  |
| H | 4.292679  | 0.170105  | 1.202130  |
| C | 4.084102  | 1.154000  | -0.726078 |
| H | 4.616000  | 2.030880  | -0.334134 |
| H | 4.451439  | 0.986344  | -1.747650 |

|   |           |           |           |
|---|-----------|-----------|-----------|
| H | 5.547571  | -0.220633 | 0.039362  |
| H | 3.429029  | -1.385272 | -1.269480 |
| O | 1.584906  | -3.118436 | -1.046347 |
| C | -1.320174 | -0.991263 | -0.185860 |
| H | -0.263183 | -0.915823 | -0.406839 |
| C | -2.114063 | 0.149998  | -0.309959 |
| C | -3.496234 | 0.074306  | -0.049583 |
| O | -4.298692 | 1.188297  | -0.076344 |
| C | -4.546025 | 1.740074  | -1.373967 |
| H | -3.622326 | 2.095188  | -1.846318 |
| H | -5.223733 | 2.586110  | -1.220012 |
| H | -5.032407 | 1.000298  | -2.026862 |
| C | -4.035933 | -1.154118 | 0.335205  |
| H | -5.101939 | -1.195070 | 0.548226  |

Sum of electronic and zero-point Energies= -1190.332414  
Sum of electronic and thermal Energies= -1190.308102  
Sum of electronic and thermal Enthalpies= -1190.307158  
Sum of electronic and thermal Free Energies= -1190.386516

#### jugcathanin-8-E2 (benzene)

|   |           |           |           |
|---|-----------|-----------|-----------|
| C | 1.948747  | 1.717987  | -0.366296 |
| O | 2.771597  | 1.861454  | -1.440678 |
| H | 2.193044  | 1.937725  | -2.219611 |
| C | 2.483886  | 1.441130  | 0.901588  |
| C | 1.585594  | 1.332944  | 1.973679  |
| H | 1.980574  | 1.156743  | 2.973113  |
| C | 0.203193  | 1.381700  | 1.788181  |
| H | -0.486752 | 1.237981  | 2.615545  |
| C | -0.309039 | 1.559171  | 0.501167  |
| O | -1.677430 | 1.455747  | 0.274943  |
| C | 0.557086  | 1.788029  | -0.570115 |
| O | 0.145021  | 1.940489  | -1.876239 |
| C | -0.635883 | 3.113971  | -2.152629 |
| H | -0.805086 | 3.115891  | -3.233850 |
| H | -1.597377 | 3.076894  | -1.629608 |
| H | -0.091183 | 4.023355  | -1.862592 |
| C | -3.128394 | -2.458695 | 0.053689  |
| H | -3.515994 | -3.475958 | 0.038785  |
| C | -1.833321 | -2.198432 | -0.410838 |
| C | -0.927648 | -3.310450 | -0.911124 |
| H | -0.650651 | -3.138811 | -1.960148 |
| H | -1.479713 | -4.257533 | -0.879177 |
| C | 0.380976  | -3.465190 | -0.100623 |
| H | 0.780960  | -4.480602 | -0.255555 |
| H | 0.192877  | -3.371126 | 0.976181  |
| C | 1.511960  | -2.522345 | -0.530912 |
| C | 2.408592  | -1.989653 | 0.577561  |
| H | 2.646678  | -2.815587 | 1.266072  |
| H | 1.767141  | -1.314804 | 1.166512  |
| C | 3.683248  | -1.264772 | 0.115621  |
| H | 4.419355  | -2.020434 | -0.190422 |
| C | 4.301664  | -0.347558 | 1.202203  |
| H | 3.993850  | -0.699429 | 2.198071  |
| C | 3.963218  | 1.163255  | 1.068408  |
| H | 4.343007  | 1.683176  | 1.959499  |
| H | 4.504935  | 1.571724  | 0.208442  |
| H | 5.396692  | -0.435385 | 1.181043  |
| H | 3.460201  | -0.687106 | -0.788371 |
| O | 1.666528  | -2.221421 | -1.700197 |
| C | -1.372434 | -0.874898 | -0.369455 |
| H | -0.383244 | -0.640085 | -0.746533 |
| C | -2.152506 | 0.154158  | 0.158640  |
| C | -3.460300 | -0.110235 | 0.607771  |
| O | -4.248840 | 0.851529  | 1.187131  |
| C | -4.693677 | 1.899506  | 0.323421  |
| H | -3.858287 | 2.515218  | -0.031701 |
| H | -5.370398 | 2.519153  | 0.921184  |
| H | -5.242721 | 1.493101  | -0.539098 |
| C | -3.933781 | -1.422538 | 0.535626  |
| H | -4.940029 | -1.619003 | 0.899174  |

Sum of electronic and zero-point Energies= -1190.333237  
Sum of electronic and thermal Energies= -1190.308736  
Sum of electronic and thermal Enthalpies= -1190.307792  
Sum of electronic and thermal Free Energies= -1190.387926

pterocarine-1-TS (benzene)

|   |           |           |           |
|---|-----------|-----------|-----------|
| C | 2.130674  | 1.898388  | -0.068825 |
| C | 1.335368  | 3.053435  | 0.054433  |
| H | 1.742455  | 4.054569  | -0.078538 |
| C | -0.045844 | 2.963721  | 0.359184  |
| O | -0.759337 | 4.123552  | 0.478245  |
| H | -1.663238 | 3.899954  | 0.745867  |
| C | -0.661461 | 1.704196  | 0.507956  |
| O | -2.046673 | 1.589374  | 0.789263  |
| C | 0.141312  | 0.590011  | 0.374694  |
| H | -0.241325 | -0.403809 | 0.444056  |
| C | 1.480678  | 0.698297  | 0.132661  |
| H | 2.034233  | -0.205725 | 0.108306  |
| C | -2.833653 | -2.201903 | -0.684017 |
| H | -2.888805 | -3.156515 | -1.205863 |
| C | -3.535398 | -1.111338 | -1.200798 |
| H | -4.159535 | -1.212264 | -2.085482 |
| C | -3.325170 | 0.171382  | -0.673649 |
| O | -3.835109 | 1.254336  | -1.316420 |
| H | -3.524845 | 2.045089  | -0.847232 |
| C | -2.540714 | 0.300573  | 0.478582  |
| C | -2.030907 | -0.839249 | 1.114970  |
| H | -1.445019 | -0.705680 | 2.020677  |
| C | -2.018478 | -2.079104 | 0.456478  |
| C | -0.924541 | -3.102651 | 0.771128  |
| H | -1.329381 | -4.120415 | 0.707268  |
| H | -0.553746 | -2.970184 | 1.794582  |
| C | 0.302124  | -3.007537 | -0.218272 |
| H | 0.016966  | -2.480372 | -1.137465 |
| H | 0.573129  | -4.023250 | -0.548774 |
| C | 1.625482  | -2.401576 | 0.313499  |
| C | 2.704048  | -2.029887 | -0.748610 |
| H | 2.196974  | -1.682262 | -1.657899 |
| H | 3.153160  | -2.996951 | -1.026931 |
| C | 3.859663  | -1.037523 | -0.333558 |
| H | 3.825178  | -0.892276 | 0.753973  |
| C | 3.955226  | 0.351989  | -1.093426 |
| H | 3.362897  | 0.288732  | -2.017658 |
| H | 4.998073  | 0.454371  | -1.421271 |
| C | 3.609389  | 1.720840  | -0.395915 |
| H | 3.960602  | 2.520683  | -1.063029 |
| H | 4.208923  | 1.817234  | 0.523567  |
| H | 4.804457  | -1.561356 | -0.521416 |
| O | 1.836375  | -2.282506 | 1.503183  |

Sum of electronic and zero-point Energies= -1036.509094  
Sum of electronic and thermal Energies= -1036.489992  
Sum of electronic and thermal Enthalpies= -1036.489048  
Sum of electronic and thermal Free Energies= -1036.554945

pterocarine-1-E1 (benzene)

|   |           |           |           |
|---|-----------|-----------|-----------|
| C | 2.594449  | -1.545804 | -0.408892 |
| C | 2.004079  | -1.995922 | 0.780869  |
| H | 2.598565  | -2.146966 | 1.679923  |
| C | 0.621659  | -2.188907 | 0.864411  |
| O | 0.065160  | -2.561556 | 2.046113  |
| H | -0.894194 | -2.628450 | 1.911550  |
| C | -0.171504 | -1.941224 | -0.266606 |
| O | -1.558655 | -1.975839 | -0.095960 |
| C | 0.409416  | -1.588868 | -1.479519 |
| H | -0.226935 | -1.410972 | -2.343210 |
| C | 1.790002  | -1.396467 | -1.549953 |
| H | 2.238774  | -1.082720 | -2.489631 |
| C | -3.587962 | 1.667763  | -0.023513 |
| H | -4.151746 | 2.599260  | -0.011306 |
| C | -4.270746 | 0.465764  | -0.226146 |

|   |           |           |           |
|---|-----------|-----------|-----------|
| H | -5.348716 | 0.449467  | -0.368711 |
| C | -3.577775 | -0.747160 | -0.258784 |
| O | -4.245961 | -1.916067 | -0.466092 |
| H | -3.588083 | -2.627243 | -0.518927 |
| C | -2.189845 | -0.724403 | -0.070113 |
| C | -1.514079 | 0.474645  | 0.137265  |
| H | -0.440781 | 0.442607  | 0.273032  |
| C | -2.196117 | 1.696727  | 0.153769  |
| C | -1.455386 | 3.016266  | 0.317056  |
| H | -2.082354 | 3.701302  | 0.902815  |
| H | -1.326599 | 3.487229  | -0.668343 |
| C | -0.064135 | 2.930401  | 0.972600  |
| H | -0.075924 | 2.283659  | 1.859467  |
| H | 0.214733  | 3.933037  | 1.334410  |
| C | 1.072921  | 2.519842  | 0.025820  |
| C | 2.197782  | 1.698261  | 0.644308  |
| H | 1.743779  | 0.751501  | 0.973608  |
| H | 2.508555  | 2.191657  | 1.579250  |
| C | 3.407142  | 1.428614  | -0.264477 |
| H | 3.049725  | 1.229451  | -1.281997 |
| C | 4.304515  | 0.266092  | 0.230755  |
| H | 4.203260  | 0.161124  | 1.320894  |
| H | 5.359717  | 0.514330  | 0.051952  |
| C | 4.045436  | -1.112437 | -0.439144 |
| H | 4.680457  | -1.860153 | 0.057054  |
| H | 4.378768  | -1.061207 | -1.484452 |
| H | 4.002484  | 2.348570  | -0.335798 |
| O | 1.069130  | 2.851639  | -1.144039 |

Sum of electronic and zero-point Energies= -1036.581242  
Sum of electronic and thermal Energies= -1036.561303  
Sum of electronic and thermal Enthalpies= -1036.560359  
Sum of electronic and thermal Free Energies= -1036.629315

pterocarine-1-E2 (benzene)

|   |           |           |           |
|---|-----------|-----------|-----------|
| C | -2.572059 | -1.571187 | -0.326211 |
| C | -2.038968 | -1.770103 | 0.951976  |
| H | -2.669567 | -1.704751 | 1.835769  |
| C | -0.668188 | -1.985971 | 1.134761  |
| O | -0.172122 | -2.123607 | 2.390548  |
| H | 0.789898  | -2.235434 | 2.317926  |
| C | 0.171946  | -1.988268 | 0.015052  |
| O | 1.553282  | -2.006907 | 0.248053  |
| C | -0.353144 | -1.886300 | -1.271235 |
| H | 0.322318  | -1.914782 | -2.123551 |
| C | -1.723713 | -1.692567 | -1.442328 |
| H | -2.128507 | -1.582488 | -2.446615 |
| C | 3.508904  | 1.629362  | -0.341515 |
| H | 4.039476  | 2.561298  | -0.529778 |
| C | 4.145495  | 0.417896  | -0.630048 |
| H | 5.154049  | 0.395625  | -1.036034 |
| C | 3.479855  | -0.793048 | -0.429720 |
| O | 4.083314  | -1.972053 | -0.741782 |
| H | 3.442498  | -2.681337 | -0.571765 |
| C | 2.176079  | -0.759162 | 0.086231  |
| C | 1.558314  | 0.444931  | 0.405290  |
| H | 0.558535  | 0.430253  | 0.827202  |
| C | 2.206960  | 1.667695  | 0.177022  |
| C | 1.493156  | 2.979805  | 0.453371  |
| H | 2.170278  | 3.808026  | 0.211618  |
| H | 1.250120  | 3.070765  | 1.520880  |
| C | 0.178246  | 3.161021  | -0.342495 |
| H | 0.298944  | 2.837003  | -1.383796 |
| H | -0.071921 | 4.233778  | -0.379612 |
| C | -1.046486 | 2.487436  | 0.290497  |
| C | -2.046971 | 1.856907  | -0.667869 |
| H | -1.513490 | 1.011296  | -1.129993 |
| H | -2.229032 | 2.557263  | -1.498158 |
| C | -3.367358 | 1.386289  | -0.037029 |
| H | -3.152824 | 0.956095  | 0.948414  |
| C | -4.147097 | 0.371257  | -0.912575 |

|                                                           |           |           |           |
|-----------------------------------------------------------|-----------|-----------|-----------|
| H                                                         | -3.838484 | 0.476320  | -1.962845 |
| H                                                         | -5.218845 | 0.611793  | -0.892900 |
| C                                                         | -4.008446 | -1.117189 | -0.488465 |
| H                                                         | -4.524716 | -1.737499 | -1.235525 |
| H                                                         | -4.539407 | -1.263646 | 0.461543  |
| H                                                         | -3.994688 | 2.266775  | 0.155597  |
| O                                                         | -1.192448 | 2.461422  | 1.498601  |
| Sum of electronic and zero-point Energies= -1036.581369   |           |           |           |
| Sum of electronic and thermal Energies= -1036.561518      |           |           |           |
| Sum of electronic and thermal Enthalpies= -1036.560574    |           |           |           |
| Sum of electronic and thermal Free Energies= -1036.629186 |           |           |           |

pterocarine-2-TS (benzene)

|   |           |           |           |
|---|-----------|-----------|-----------|
| C | -2.177849 | 1.825543  | 0.076217  |
| C | -1.423244 | 3.013075  | -0.013399 |
| H | -1.868226 | 3.993327  | 0.150202  |
| C | -0.041723 | 2.988032  | -0.327041 |
| O | 0.619971  | 4.178998  | -0.436798 |
| H | 1.537445  | 3.997487  | -0.689705 |
| C | 0.624303  | 1.755641  | -0.489742 |
| O | 2.013506  | 1.679817  | -0.767030 |
| C | -0.135063 | 0.612227  | -0.373811 |
| H | 0.299990  | -0.360364 | -0.399147 |
| C | -1.484399 | 0.658270  | -0.168553 |
| H | -1.992153 | -0.274712 | -0.164428 |
| C | 2.707025  | -2.149883 | 0.621715  |
| H | 2.708228  | -3.116124 | 1.122778  |
| C | 3.367896  | -1.079775 | 1.226004  |
| H | 3.905977  | -1.208947 | 2.161882  |
| C | 3.206296  | 0.216036  | 0.719060  |
| O | 3.659508  | 1.279309  | 1.432216  |
| H | 3.380387  | 2.083181  | 0.965763  |
| C | 2.513941  | 0.381592  | -0.486704 |
| C | 2.051902  | -0.735507 | -1.196881 |
| H | 1.514391  | -0.558717 | -2.126266 |
| C | 1.996408  | -1.998237 | -0.581312 |
| C | 1.022153  | -3.079570 | -1.058844 |
| H | 1.126274  | -3.949132 | -0.398561 |
| H | 1.302013  | -3.423635 | -2.065743 |
| C | -0.499911 | -2.713939 | -1.156637 |
| H | -1.004763 | -3.549695 | -1.668095 |
| H | -0.651073 | -1.859845 | -1.833331 |
| C | -1.321139 | -2.433752 | 0.122216  |
| C | -2.851497 | -2.187952 | -0.072563 |
| H | -3.297280 | -3.178284 | 0.110497  |
| H | -3.056347 | -1.970103 | -1.129151 |
| C | -3.576191 | -1.138068 | 0.863246  |
| H | -4.413253 | -1.662684 | 1.338491  |
| C | -4.174887 | 0.157125  | 0.169513  |
| H | -5.242921 | 0.191511  | 0.420496  |
| H | -4.139029 | 0.022311  | -0.921410 |
| C | -3.626117 | 1.593542  | 0.493317  |
| H | -4.301907 | 2.316057  | 0.012690  |
| H | -3.720993 | 1.777960  | 1.575336  |
| H | -2.897544 | -0.872628 | 1.683241  |
| O | -0.825065 | -2.451044 | 1.229069  |

Sum of electronic and zero-point Energies= -1036.506444  
 Sum of electronic and thermal Energies= -1036.487484  
 Sum of electronic and thermal Enthalpies= -1036.486540  
 Sum of electronic and thermal Free Energies= -1036.551868

pterocarine-2-E1 (benzene)

|   |           |          |           |
|---|-----------|----------|-----------|
| C | -2.594644 | 1.545955 | 0.408466  |
| C | -2.004043 | 1.995432 | -0.781424 |
| H | -2.598312 | 2.145944 | -1.680710 |
| C | -0.621604 | 2.188354 | -0.864788 |
| O | -0.064889 | 2.560160 | -2.046682 |
| H | 0.894378  | 2.627700 | -1.911878 |
| C | 0.171346  | 1.941339 | 0.266521  |
| O | 1.558534  | 1.975917 | 0.096291  |

|                                                           |           |           |           |
|-----------------------------------------------------------|-----------|-----------|-----------|
| C                                                         | -0.409831 | 1.589712  | 1.479528  |
| H                                                         | 0.226360  | 1.412383  | 2.343453  |
| C                                                         | -1.790425 | 1.397320  | 1.549784  |
| H                                                         | -2.239380 | 1.084096  | 2.489552  |
| C                                                         | 3.588071  | -1.667550 | 0.023449  |
| H                                                         | 4.151954  | -2.598986 | 0.011078  |
| C                                                         | 4.270775  | -0.465487 | 0.226029  |
| H                                                         | 5.348766  | -0.449081 | 0.368424  |
| C                                                         | 3.577686  | 0.747345  | 0.258840  |
| O                                                         | 4.245786  | 1.916339  | 0.466209  |
| H                                                         | 3.587858  | 2.627487  | 0.518732  |
| C                                                         | 2.189723  | 0.724498  | 0.070358  |
| C                                                         | 1.514041  | -0.474603 | -0.136958 |
| H                                                         | 0.440729  | -0.442684 | -0.272650 |
| C                                                         | 2.196215  | -1.696636 | -0.153651 |
| C                                                         | 1.455590  | -3.016213 | -0.316898 |
| H                                                         | 1.326771  | -3.487189 | 0.668493  |
| H                                                         | 2.082590  | -3.701232 | -0.902640 |
| C                                                         | 0.064301  | -2.930471 | -0.972461 |
| H                                                         | -0.214483 | -3.933174 | -1.334123 |
| H                                                         | 0.076045  | -2.283787 | -1.859363 |
| C                                                         | -1.072722 | -2.519900 | -0.025606 |
| C                                                         | -2.197523 | -1.698180 | -0.643910 |
| H                                                         | -2.508410 | -2.191518 | -1.578866 |
| H                                                         | -1.743553 | -0.751421 | -0.973233 |
| C                                                         | -3.406887 | -1.428534 | 0.264915  |
| H                                                         | -4.002017 | -2.348596 | 0.336564  |
| C                                                         | -4.304516 | -0.266356 | -0.230660 |
| H                                                         | -5.359664 | -0.514661 | -0.051619 |
| H                                                         | -4.203416 | -0.161806 | -1.320850 |
| C                                                         | -4.045599 | 1.112482  | 0.438694  |
| H                                                         | -4.680616 | 1.859934  | -0.057901 |
| H                                                         | -4.379060 | 1.061665  | 1.483982  |
| H                                                         | -3.049483 | -1.228960 | 1.282359  |
| O                                                         | -1.069030 | -2.852061 | 1.144160  |
| Sum of electronic and zero-point Energies= -1036.581241   |           |           |           |
| Sum of electronic and thermal Energies= -1036.561303      |           |           |           |
| Sum of electronic and thermal Enthalpies= -1036.560359    |           |           |           |
| Sum of electronic and thermal Free Energies= -1036.629305 |           |           |           |

pterocarine-2-E2 (benzene)

|   |           |           |           |
|---|-----------|-----------|-----------|
| C | -2.572002 | 1.571264  | -0.326104 |
| C | -2.038826 | 1.769938  | 0.952079  |
| H | -2.669362 | 1.704457  | 1.835906  |
| C | -0.668026 | 1.985731  | 1.134807  |
| O | -0.171860 | 2.123129  | 2.390586  |
| H | 0.790127  | 2.235172  | 2.317899  |
| C | 0.172029  | 1.988245  | 0.015045  |
| O | 1.553372  | 2.006861  | 0.247979  |
| C | -0.353135 | 1.886486  | -1.271232 |
| H | 0.322275  | 1.915101  | -2.123587 |
| C | -1.723717 | 1.692796  | -1.442259 |
| H | -2.128581 | 1.582886  | -2.446538 |
| C | 3.508932  | -1.629459 | -0.341475 |
| H | 4.039510  | -2.561395 | -0.529718 |
| C | 4.145580  | -0.417992 | -0.629922 |
| H | 5.154175  | -0.395752 | -1.035803 |
| C | 3.479978  | 0.792969  | -0.429627 |
| O | 4.083510  | 1.971981  | -0.741540 |
| H | 3.442673  | 2.681288  | -0.571704 |
| C | 2.176135  | 0.759105  | 0.086183  |
| C | 1.558308  | -0.444979 | 0.405128  |
| H | 0.558478  | -0.430279 | 0.826916  |
| C | 2.206944  | -1.667769 | 0.176912  |
| C | 1.493010  | -2.979833 | 0.453153  |
| H | 1.249939  | -3.070841 | 1.520647  |
| H | 2.170052  | -3.808111 | 0.211361  |
| C | 0.178085  | -3.160825 | -0.342748 |
| H | -0.072142 | -4.233563 | -0.380149 |
| H | 0.298814  | -2.836580 | -1.383977 |

|                                                           |           |           |           |
|-----------------------------------------------------------|-----------|-----------|-----------|
| C                                                         | -1.046636 | -2.487347 | 0.290366  |
| C                                                         | -2.047054 | -1.856533 | -0.667878 |
| H                                                         | -2.229023 | -2.556684 | -1.498375 |
| H                                                         | -1.513581 | -1.010810 | -1.129791 |
| C                                                         | -3.367538 | -1.386190 | -0.037035 |
| H                                                         | -3.994808 | -2.266786 | 0.155290  |
| C                                                         | -4.147319 | -0.371036 | -0.912386 |
| H                                                         | -5.219096 | -0.611430 | -0.892476 |
| H                                                         | -3.838941 | -0.476156 | -1.962722 |
| C                                                         | -4.008426 | 1.117412  | -0.488331 |
| H                                                         | -4.524643 | 1.737745  | -1.235409 |
| H                                                         | -4.539367 | 1.263971  | 0.461673  |
| H                                                         | -3.153161 | -0.956238 | 0.948549  |
| O                                                         | -1.192681 | -2.461707 | 1.498467  |
| Sum of electronic and zero-point Energies= -1036.581369   |           |           |           |
| Sum of electronic and thermal Energies= -1036.561519      |           |           |           |
| Sum of electronic and thermal Enthalpies= -1036.560574    |           |           |           |
| Sum of electronic and thermal Free Energies= -1036.629187 |           |           |           |

pterocaraine-3-TS (benzene)

|                                                           |           |           |           |
|-----------------------------------------------------------|-----------|-----------|-----------|
| C                                                         | 1.959633  | 2.016188  | -0.112274 |
| C                                                         | 1.098677  | 3.125718  | 0.013535  |
| H                                                         | 1.454839  | 4.148391  | -0.100646 |
| C                                                         | -0.275751 | 2.964113  | 0.318183  |
| O                                                         | -1.042547 | 4.085111  | 0.471177  |
| H                                                         | -1.935691 | 3.812093  | 0.728829  |
| C                                                         | -0.828653 | 1.672017  | 0.436027  |
| O                                                         | -2.200079 | 1.470806  | 0.737503  |
| C                                                         | 0.031090  | 0.607682  | 0.272104  |
| H                                                         | -0.301259 | -0.403859 | 0.298840  |
| C                                                         | 1.370239  | 0.782299  | 0.073502  |
| H                                                         | 1.959024  | -0.102657 | 0.073801  |
| C                                                         | -2.646065 | -2.416258 | -0.609634 |
| H                                                         | -2.605505 | -3.381846 | -1.112214 |
| C                                                         | -3.468457 | -1.418115 | -1.136420 |
| H                                                         | -4.092375 | -1.605980 | -2.006997 |
| C                                                         | -3.379491 | -0.105552 | -0.648196 |
| O                                                         | -3.998132 | 0.903211  | -1.315862 |
| H                                                         | -3.757248 | 1.734768  | -0.877277 |
| C                                                         | -2.596528 | 0.133517  | 0.487209  |
| C                                                         | -1.966900 | -0.932675 | 1.144176  |
| H                                                         | -1.369073 | -0.711158 | 2.024669  |
| C                                                         | -1.828177 | -2.179317 | 0.510714  |
| C                                                         | -0.599555 | -3.043964 | 0.812078  |
| H                                                         | -0.863099 | -4.108576 | 0.780829  |
| H                                                         | -0.228748 | -2.837452 | 1.822964  |
| C                                                         | 0.592386  | -2.807914 | -0.201508 |
| H                                                         | 0.289612  | -2.155210 | -1.032931 |
| H                                                         | 0.851967  | -3.760491 | -0.688316 |
| C                                                         | 1.925007  | -2.262999 | 0.372800  |
| C                                                         | 3.129987  | -2.052008 | -0.602078 |
| H                                                         | 2.991686  | -2.734836 | -1.451812 |
| H                                                         | 3.996303  | -2.415509 | -0.033619 |
| C                                                         | 3.530133  | -0.657120 | -1.234986 |
| H                                                         | 4.341222  | -0.911591 | -1.930367 |
| C                                                         | 4.046902  | 0.498973  | -0.293472 |
| H                                                         | 5.129729  | 0.595305  | -0.445575 |
| H                                                         | 3.924995  | 0.204918  | 0.757435  |
| C                                                         | 3.440681  | 1.935460  | -0.475076 |
| H                                                         | 4.036352  | 2.630396  | 0.134450  |
| H                                                         | 3.582912  | 2.261101  | -1.517938 |
| H                                                         | 2.710733  | -0.301284 | -1.870079 |
| O                                                         | 2.074843  | -2.098727 | 1.567915  |
| Sum of electronic and zero-point Energies= -1036.501592   |           |           |           |
| Sum of electronic and thermal Energies= -1036.482689      |           |           |           |
| Sum of electronic and thermal Enthalpies= -1036.481745    |           |           |           |
| Sum of electronic and thermal Free Energies= -1036.546910 |           |           |           |

pterocaraine-3-E1 (benzene)

|   |           |          |           |
|---|-----------|----------|-----------|
| C | -2.316032 | 1.927033 | -0.243316 |
|---|-----------|----------|-----------|

|                                                           |           |           |           |
|-----------------------------------------------------------|-----------|-----------|-----------|
| C                                                         | -1.550754 | 2.158810  | 0.906214  |
| H                                                         | -2.018794 | 2.222135  | 1.886287  |
| C                                                         | -0.155252 | 2.210137  | 0.835912  |
| O                                                         | 0.564904  | 2.346765  | 1.980164  |
| H                                                         | 1.505459  | 2.355011  | 1.742567  |
| C                                                         | 0.468992  | 2.038760  | -0.407304 |
| O                                                         | 1.851272  | 1.835154  | -0.411988 |
| C                                                         | -0.282161 | 1.945704  | -1.574925 |
| H                                                         | 0.231160  | 1.833539  | -2.527088 |
| C                                                         | -1.673795 | 1.899534  | -1.493282 |
| H                                                         | -2.258723 | 1.756673  | -2.399546 |
| C                                                         | 3.214182  | -2.071185 | 0.124762  |
| H                                                         | 3.608144  | -3.072747 | 0.289157  |
| C                                                         | 4.092841  | -0.982700 | 0.161742  |
| H                                                         | 5.154373  | -1.122736 | 0.351962  |
| C                                                         | 3.616661  | 0.312969  | -0.033774 |
| O                                                         | 4.468680  | 1.376282  | 0.017510  |
| H                                                         | 3.961567  | 2.173576  | -0.201584 |
| C                                                         | 2.243837  | 0.495761  | -0.265545 |
| C                                                         | 1.375519  | -0.589889 | -0.328827 |
| H                                                         | 0.327131  | -0.426591 | -0.548367 |
| C                                                         | 1.847347  | -1.896632 | -0.126402 |
| C                                                         | 0.901036  | -3.083967 | -0.204286 |
| H                                                         | 1.444739  | -3.978100 | 0.124342  |
| H                                                         | 0.618950  | -3.258407 | -1.252373 |
| C                                                         | -0.402831 | -2.970961 | 0.616214  |
| H                                                         | -0.260513 | -2.370824 | 1.527710  |
| H                                                         | -0.702710 | -3.966639 | 0.981157  |
| C                                                         | -1.620089 | -2.428506 | -0.133622 |
| C                                                         | -2.912264 | -2.284802 | 0.672732  |
| H                                                         | -2.817479 | -2.827524 | 1.621655  |
| H                                                         | -3.722735 | -2.755187 | 0.098911  |
| C                                                         | -3.265140 | -0.801519 | 0.963784  |
| H                                                         | -3.966211 | -0.774002 | 1.809812  |
| C                                                         | -3.876063 | -0.045566 | -0.231873 |
| H                                                         | -4.936099 | -0.322888 | -0.329035 |
| H                                                         | -3.382348 | -0.369262 | -1.156017 |
| C                                                         | -3.765013 | 1.501932  | -0.132436 |
| H                                                         | -4.359144 | 1.946517  | -0.942505 |
| H                                                         | -4.200147 | 1.851124  | 0.814287  |
| H                                                         | -2.357246 | -0.290415 | 1.309386  |
| O                                                         | -1.574294 | -2.134791 | -1.315104 |
| Sum of electronic and zero-point Energies= -1036.579168   |           |           |           |
| Sum of electronic and thermal Energies= -1036.559411      |           |           |           |
| Sum of electronic and thermal Enthalpies= -1036.558467    |           |           |           |
| Sum of electronic and thermal Free Energies= -1036.626469 |           |           |           |

pterocaraine-3-E2 (benzene)

|   |           |           |           |
|---|-----------|-----------|-----------|
| C | -2.295427 | 1.885199  | 0.390665  |
| C | -1.726394 | 2.161753  | -0.859500 |
| H | -2.342980 | 2.214259  | -1.754486 |
| C | -0.340448 | 2.255644  | -1.008866 |
| O | 0.193285  | 2.445040  | -2.242629 |
| H | 1.159980  | 2.423302  | -2.152191 |
| C | 0.475479  | 2.063889  | 0.115148  |
| O | 1.846491  | 1.887249  | -0.109390 |
| C | -0.077292 | 1.921057  | 1.382823  |
| H | 0.581960  | 1.798116  | 2.239282  |
| C | -1.464407 | 1.848444  | 1.522673  |
| H | -1.897503 | 1.687153  | 2.507676  |
| C | 3.188799  | -2.051603 | 0.192112  |
| H | 3.567480  | -3.066970 | 0.297921  |
| C | 4.022475  | -0.980301 | 0.528655  |
| H | 5.032783  | -1.147055 | 0.894784  |
| C | 3.558662  | 0.332167  | 0.423268  |
| O | 4.356890  | 1.376768  | 0.776597  |
| H | 3.833473  | 2.188495  | 0.678350  |
| C | 2.252306  | 0.543122  | -0.041950 |
| C | 1.431654  | -0.522475 | -0.399337 |
| H | 0.431246  | -0.331694 | -0.773799 |

|   |           |           |           |
|---|-----------|-----------|-----------|
| C | 1.882880  | -1.845054 | -0.274514 |
| C | 0.974097  | -3.009366 | -0.632033 |
| H | 1.537825  | -3.940826 | -0.499269 |
| H | 0.700775  | -2.955087 | -1.694656 |
| C | -0.333782 | -3.110088 | 0.185674  |
| H | -0.192777 | -2.764227 | 1.220713  |
| H | -0.634834 | -4.166362 | 0.281032  |
| C | -1.549861 | -2.394283 | -0.402549 |
| C | -2.835493 | -2.438749 | 0.425595  |
| H | -2.730829 | -3.176495 | 1.231065  |
| H | -3.650304 | -2.775897 | -0.230129 |
| C | -3.187531 | -1.055309 | 1.035723  |
| H | -3.862774 | -1.215623 | 1.888084  |
| C | -3.838966 | -0.070483 | 0.045646  |
| H | -4.899484 | -0.335028 | -0.078392 |
| H | -3.370246 | -0.184156 | -0.939176 |
| C | -3.734977 | 1.422146  | 0.468303  |
| H | -4.369447 | 2.019272  | -0.200588 |
| H | -4.128511 | 1.553285  | 1.486151  |
| H | -2.271856 | -0.617753 | 1.454189  |
| O | -1.509745 | -1.826677 | -1.479800 |

Sum of electronic and zero-point Energies= -1036.579844  
Sum of electronic and thermal Energies= -1036.560124  
Sum of electronic and thermal Enthalpies= -1036.559180  
Sum of electronic and thermal Free Energies= -1036.627223

#### myricatomentogenin-1-TS (benzene)

|   |           |           |           |
|---|-----------|-----------|-----------|
| C | 2.918772  | 0.477128  | -0.163225 |
| O | 4.228779  | 0.749365  | -0.409349 |
| H | 4.314877  | 1.718703  | -0.387484 |
| C | 2.444211  | -0.848950 | -0.204197 |
| C | 1.100456  | -0.981915 | 0.066853  |
| H | 0.684974  | -1.957711 | 0.094838  |
| C | 0.235194  | 0.047041  | 0.306358  |
| H | -0.786460 | -0.225774 | 0.441837  |
| C | 0.672821  | 1.359045  | 0.346860  |
| O | -0.230328 | 2.410644  | 0.608421  |
| C | 2.044767  | 1.572346  | 0.119505  |
| O | 2.629213  | 2.825293  | 0.075788  |
| C | 2.636778  | 3.538402  | 1.323390  |
| H | 1.616024  | 3.774885  | 1.645775  |
| H | 3.143299  | 2.956381  | 2.106083  |
| H | 3.188042  | 4.466377  | 1.140347  |
| C | -3.791110 | 0.749271  | -0.697091 |
| H | -4.609687 | 0.209094  | -1.171382 |
| C | -3.198583 | 0.228253  | 0.468370  |
| C | -3.397104 | -1.232285 | 0.879505  |
| H | -4.463173 | -1.490785 | 0.850437  |
| H | -3.057026 | -1.393570 | 1.909401  |
| C | -2.632997 | -2.243000 | -0.060376 |
| H | -2.426150 | -1.782267 | -1.034551 |
| H | -3.298947 | -3.091979 | -0.284836 |
| C | -1.331988 | -2.895860 | 0.470115  |
| C | -0.440741 | -3.630773 | -0.575553 |
| H | -0.493691 | -3.083763 | -1.525885 |
| H | -0.971293 | -4.577708 | -0.765669 |
| C | 1.056683  | -3.955543 | -0.196107 |
| H | 1.178840  | -5.040310 | -0.299105 |
| C | 2.199393  | -3.284600 | -1.068625 |
| H | 2.870335  | -4.095709 | -1.380452 |
| C | 3.148913  | -2.164539 | -0.501701 |
| H | 3.651805  | -2.538274 | 0.404757  |
| H | 3.948616  | -2.015551 | -1.239844 |
| H | 1.751640  | -2.902366 | -1.997434 |
| H | 1.201723  | -3.752192 | 0.872742  |
| O | -1.054979 | -2.890408 | 1.652192  |
| C | -2.184904 | 0.995474  | 1.063927  |
| H | -1.717918 | 0.650348  | 1.982853  |
| C | -1.568047 | 2.031606  | 0.350794  |
| C | -2.145364 | 2.522144  | -0.826071 |

|   |           |          |           |
|---|-----------|----------|-----------|
| O | -1.560845 | 3.519302 | -1.538522 |
| H | -0.725313 | 3.741216 | -1.094942 |
| C | -3.319880 | 1.918091 | -1.298188 |
| H | -3.778858 | 2.309360 | -2.202988 |

Sum of electronic and zero-point Energies= -1150.994995  
Sum of electronic and thermal Energies= -1150.973228  
Sum of electronic and thermal Enthalpies= -1150.972284  
Sum of electronic and thermal Free Energies= -1151.044173

#### myricatomentogenin-1-E1 (benzene)

|   |           |           |           |
|---|-----------|-----------|-----------|
| C | 1.734713  | 1.764995  | -0.398424 |
| O | 2.305981  | 2.038304  | -1.603367 |
| H | 1.581423  | 2.300552  | -2.197552 |
| C | 2.530825  | 1.292013  | 0.657713  |
| C | 1.904646  | 1.074345  | 1.891816  |
| H | 2.507679  | 0.740289  | 2.733631  |
| C | 0.523840  | 1.210124  | 2.056394  |
| H | 0.039426  | 0.972709  | 2.999692  |
| C | -0.260982 | 1.566210  | 0.961827  |
| O | -1.648073 | 1.510423  | 1.054531  |
| C | 0.341040  | 1.898338  | -0.258640 |
| O | -0.333247 | 2.241791  | -1.407535 |
| C | -1.251382 | 3.343665  | -1.335760 |
| H | -2.204756 | 3.035902  | -0.895037 |
| H | -0.824188 | 4.173326  | -0.757087 |
| H | -1.418828 | 3.664329  | -2.368728 |
| C | -3.534750 | -1.888667 | -0.443217 |
| H | -4.057380 | -2.749370 | -0.857142 |
| C | -2.184015 | -2.002647 | -0.090903 |
| C | -1.421091 | -3.304332 | -0.273063 |
| H | -2.061611 | -4.013159 | -0.811923 |
| H | -1.201645 | -3.759867 | 0.702989  |
| C | -0.081079 | -3.163172 | -1.031220 |
| H | -0.178952 | -2.483137 | -1.886608 |
| H | 0.197871  | -4.144424 | -1.448467 |
| C | 1.109119  | -2.752904 | -0.154657 |
| C | 2.138930  | -1.834199 | -0.798036 |
| H | 1.607610  | -0.890026 | -0.993417 |
| H | 2.379656  | -2.225082 | -1.799261 |
| C | 3.414271  | -1.585072 | 0.022419  |
| H | 4.053413  | -2.475220 | -0.050438 |
| C | 4.207507  | -0.332402 | -0.428820 |
| H | 5.284226  | -0.549337 | -0.404404 |
| C | 3.985149  | 0.939848  | 0.435841  |
| H | 4.455485  | 0.786538  | 1.416495  |
| H | 4.513943  | 1.775391  | -0.043138 |
| H | 3.969491  | -0.097504 | -1.474318 |
| H | 3.141704  | -1.504846 | 1.081814  |
| O | 1.210101  | -3.147432 | 0.992265  |
| C | -1.544092 | -0.869065 | 0.434946  |
| H | -0.506790 | -0.922059 | 0.745425  |
| C | -2.225939 | 0.334466  | 0.573045  |
| C | -3.584344 | 0.436659  | 0.234685  |
| O | -4.253825 | 1.617790  | 0.379830  |
| H | -3.654865 | 2.239992  | 0.821700  |
| C | -4.233542 | -0.687786 | -0.272046 |
| H | -5.283336 | -0.604503 | -0.543419 |

Sum of electronic and zero-point Energies= -1151.064393  
Sum of electronic and thermal Energies= -1151.041798  
Sum of electronic and thermal Enthalpies= -1151.040854  
Sum of electronic and thermal Free Energies= -1151.115365

#### myricatomentogenin-1-E2 (benzene)

|   |           |           |           |
|---|-----------|-----------|-----------|
| C | -2.141167 | -1.637829 | 0.284857  |
| O | -3.012820 | -1.829916 | 1.310439  |
| H | -2.504564 | -2.262533 | 2.019153  |
| C | -2.577249 | -1.044884 | -0.909401 |
| C | -1.643939 | -0.931128 | -1.950512 |
| H | -1.967393 | -0.518208 | -2.904671 |
| C | -0.305065 | -1.276514 | -1.779687 |



|   |           |           |           |
|---|-----------|-----------|-----------|
| H | 0.421244  | -1.127107 | -2.574486 |
| C | 0.130823  | -1.763920 | -0.544270 |
| O | 1.492000  | -1.946903 | -0.311761 |
| C | -0.790042 | -2.000671 | 0.479229  |
| O | -0.504865 | -2.588835 | 1.691994  |
| C | 0.367524  | -1.883125 | 2.592420  |
| H | 1.398418  | -1.880503 | 2.225958  |
| H | 0.021905  | -0.852944 | 2.749743  |
| H | 0.320595  | -2.431495 | 3.538495  |
| C | 3.812068  | 1.511998  | -0.136283 |
| H | 4.444212  | 2.398221  | -0.114121 |
| C | 2.473784  | 1.605092  | 0.269952  |
| C | 1.868566  | 2.915290  | 0.747392  |
| H | 2.613908  | 3.711305  | 0.628790  |
| H | 1.637070  | 2.859472  | 1.820382  |
| C | 0.573771  | 3.333486  | 0.013414  |
| H | 0.670590  | 3.193664  | -1.070635 |
| H | 0.408439  | 4.411997  | 0.170191  |
| C | -0.704274 | 2.655475  | 0.525077  |
| C | -1.766182 | 2.347102  | -0.520261 |
| H | -1.301499 | 1.613395  | -1.196938 |
| H | -1.912475 | 3.243771  | -1.143502 |
| C | -3.106791 | 1.816080  | 0.013065  |
| H | -3.669723 | 2.655532  | 0.442146  |
| C | -3.961292 | 1.110293  | -1.074221 |
| H | -5.006920 | 1.438100  | -0.997034 |
| C | -3.963716 | -0.443053 | -1.014972 |
| H | -4.558520 | -0.766002 | -0.154271 |
| H | -4.475033 | -0.822772 | -1.911539 |
| H | -3.623614 | 1.432523  | -2.070091 |
| H | -2.914545 | 1.134250  | 0.849737  |
| O | -0.842401 | 2.378716  | 1.702867  |
| C | 1.696260  | 0.438915  | 0.221123  |
| H | 0.660444  | 0.460899  | 0.539829  |
| C | 2.228400  | -0.761826 | -0.236964 |
| C | 3.571222  | -0.850489 | -0.635321 |
| O | 4.096555  | -2.024282 | -1.080813 |
| H | 3.384095  | -2.683843 | -1.076536 |
| C | 4.358761  | 0.300687  | -0.574671 |
| H | 5.396847  | 0.236175  | -0.892199 |

Sum of electronic and zero-point Energies= -1151.061237  
Sum of electronic and thermal Energies= -1151.038572  
Sum of electronic and thermal Enthalpies= -1151.037628  
Sum of electronic and thermal Free Energies= -1151.112822

#### myricatomentogenin-2-TS (benzene)

|   |           |           |           |
|---|-----------|-----------|-----------|
| C | -1.124720 | 2.767095  | 0.112440  |
| O | -1.566643 | 4.044528  | -0.041471 |
| H | -0.794027 | 4.620409  | 0.093388  |
| C | -2.016199 | 1.686785  | -0.017484 |
| C | -1.444324 | 0.447736  | 0.171871  |
| H | -2.071820 | -0.408025 | 0.151148  |
| C | -0.118318 | 0.221498  | 0.401115  |
| H | 0.174178  | -0.802119 | 0.460797  |
| C | 0.782193  | 1.263391  | 0.551840  |
| O | 2.137788  | 0.992062  | 0.848889  |
| C | 0.262465  | 2.564719  | 0.408744  |
| O | 0.972841  | 3.738653  | 0.564022  |
| C | 2.221383  | 3.857378  | -0.124560 |
| H | 2.459497  | 4.925884  | -0.144617 |
| H | 3.015378  | 3.325164  | 0.412994  |
| H | 2.143708  | 3.484104  | -1.155488 |
| C | 2.583809  | -2.826086 | -0.700863 |
| H | 2.559085  | -3.772674 | -1.239479 |
| C | 1.783237  | -2.657074 | 0.444041  |
| C | 0.616532  | -3.599809 | 0.744902  |
| H | 0.255380  | -3.454802 | 1.770025  |
| H | 0.945578  | -4.643709 | 0.666288  |
| C | -0.598266 | -3.404054 | -0.241949 |
| H | -0.976892 | -4.395904 | -0.537668 |

|   |           |           |           |
|---|-----------|-----------|-----------|
| H | -0.264373 | -2.937956 | -1.177369 |
| C | -1.847661 | -2.651364 | 0.279729  |
| C | -2.864357 | -2.153398 | -0.789635 |
| H | -3.374810 | -3.068914 | -1.129936 |
| H | -2.302741 | -1.804194 | -1.665914 |
| C | -3.950480 | -1.094394 | -0.356468 |
| H | -4.928815 | -1.546250 | -0.559308 |
| C | -3.942275 | 0.314092  | -1.085035 |
| H | -3.354325 | 0.226592  | -2.010227 |
| C | -3.497701 | 1.638917  | -0.360524 |
| H | -3.767567 | 2.474050  | -1.020787 |
| H | -4.102667 | 1.776397  | 0.550125  |
| H | -4.973929 | 0.500712  | -1.411210 |
| H | -3.912659 | -0.975937 | 0.734173  |
| O | -2.053116 | -2.515102 | 1.468601  |
| C | 1.897537  | -1.435505 | 1.126425  |
| H | 1.323288  | -1.270083 | 2.034311  |
| C | 2.502629  | -0.331383 | 0.510898  |
| C | 3.274678  | -0.505348 | -0.643747 |
| O | 3.876001  | 0.545523  | -1.262165 |
| H | 3.656230  | 1.343616  | -0.755879 |
| C | 3.374641  | -1.789182 | -1.198814 |
| H | 3.988513  | -1.925742 | -2.085926 |

Sum of electronic and zero-point Energies= -1150.993264  
Sum of electronic and thermal Energies= -1150.971602  
Sum of electronic and thermal Enthalpies= -1150.970657  
Sum of electronic and thermal Free Energies= -1151.042187

#### myricatomentogenin-2-E1 (benzene)

|   |           |           |           |
|---|-----------|-----------|-----------|
| C | 2.058905  | -1.771739 | -0.196298 |
| O | 2.865902  | -2.151173 | -1.224913 |
| H | 2.299277  | -2.622315 | -1.859901 |
| C | 2.597166  | -1.037002 | 0.869511  |
| C | 1.740666  | -0.711222 | 1.930439  |
| H | 2.143057  | -0.176664 | 2.788158  |
| C | 0.380621  | -1.006633 | 1.888024  |
| H | -0.288264 | -0.692928 | 2.684937  |
| C | -0.158566 | -1.645443 | 0.769418  |
| O | -1.540767 | -1.775347 | 0.656395  |
| C | 0.681057  | -2.078148 | -0.265688 |
| O | 0.332502  | -2.806438 | -1.376486 |
| C | -0.891331 | -2.531676 | -2.072237 |
| H | -0.783007 | -3.005348 | -3.053068 |
| H | -1.750076 | -2.965065 | -1.550762 |
| H | -1.041305 | -1.452842 | -2.202912 |
| C | -3.791678 | 1.635334  | -0.169492 |
| H | -4.415509 | 2.501029  | -0.386301 |
| C | -2.396210 | 1.747533  | -0.247220 |
| C | -1.727689 | 3.070042  | -0.592625 |
| H | -1.617319 | 3.678054  | 0.317208  |
| H | -2.391412 | 3.635567  | -1.259387 |
| C | -0.334943 | 2.961678  | -1.245683 |
| H | -0.117104 | 3.906530  | -1.769078 |
| H | -0.312375 | 2.179142  | -2.015138 |
| C | 0.829664  | 2.778885  | -0.261604 |
| C | 1.998500  | 1.929426  | -0.749497 |
| H | 2.265253  | 2.260228  | -1.765953 |
| H | 1.598841  | 0.913033  | -0.888669 |
| C | 3.232714  | 1.904691  | 0.165622  |
| H | 3.772443  | 2.853671  | 0.045782  |
| C | 4.193364  | 0.721008  | -0.112871 |
| H | 4.095148  | 0.397263  | -1.157972 |
| C | 4.014225  | -0.512400 | 0.815666  |
| H | 4.702800  | -1.298608 | 0.479243  |
| H | 4.319902  | -0.232359 | 1.832920  |
| H | 5.232387  | 1.059131  | 0.002615  |
| H | 2.897875  | 1.887280  | 1.209917  |
| O | 0.811565  | 3.299811  | 0.837015  |
| C | -1.634103 | 0.605939  | 0.032983  |
| H | -0.553759 | 0.648059  | -0.010523 |

|                                                           |           |           |          |
|-----------------------------------------------------------|-----------|-----------|----------|
| C                                                         | -2.238366 | -0.596498 | 0.390802 |
| C                                                         | -3.634832 | -0.699943 | 0.472687 |
| O                                                         | -4.234867 | -1.875125 | 0.812633 |
| H                                                         | -3.535409 | -2.514335 | 1.021513 |
| C                                                         | -4.404057 | 0.429704  | 0.187018 |
| H                                                         | -5.486767 | 0.346435  | 0.246475 |
| Sum of electronic and zero-point Energies= -1151.061651   |           |           |          |
| Sum of electronic and thermal Energies= -1151.039112      |           |           |          |
| Sum of electronic and thermal Enthalpies= -1151.038167    |           |           |          |
| Sum of electronic and thermal Free Energies= -1151.112739 |           |           |          |

myricatomentogenin-2-E2 (benzene)

|                                                           |           |           |           |
|-----------------------------------------------------------|-----------|-----------|-----------|
| C                                                         | 2.005608  | -1.499199 | 0.386782  |
| O                                                         | 2.807938  | -1.501691 | 1.485161  |
| H                                                         | 2.231480  | -1.689748 | 2.246426  |
| C                                                         | 2.522661  | -1.128940 | -0.864752 |
| C                                                         | 1.654661  | -1.177147 | -1.965707 |
| H                                                         | 2.044300  | -0.931517 | -2.952361 |
| C                                                         | 0.296581  | -1.465086 | -1.823396 |
| H                                                         | -0.381294 | -1.435439 | -2.672625 |
| C                                                         | -0.215024 | -1.730568 | -0.552116 |
| O                                                         | -1.590738 | -1.838312 | -0.359147 |
| C                                                         | 0.640914  | -1.809870 | 0.548330  |
| O                                                         | 0.225148  | -2.032557 | 1.841011  |
| C                                                         | -0.428464 | -3.287298 | 2.093277  |
| H                                                         | -0.590093 | -3.328945 | 3.174637  |
| H                                                         | -1.391403 | -3.339770 | 1.574837  |
| H                                                         | 0.207981  | -4.127415 | 1.782508  |
| C                                                         | -3.706707 | 1.740829  | -0.069858 |
| H                                                         | -4.283526 | 2.663527  | -0.032273 |
| C                                                         | -2.373928 | 1.739700  | 0.361761  |
| C                                                         | -1.692149 | 3.002798  | 0.859203  |
| H                                                         | -1.415158 | 2.901609  | 1.917689  |
| H                                                         | -2.403329 | 3.835546  | 0.797366  |
| C                                                         | -0.412028 | 3.378769  | 0.075691  |
| H                                                         | -0.197915 | 4.448716  | 0.231676  |
| H                                                         | -0.557200 | 3.248496  | -1.004003 |
| C                                                         | 0.855515  | 2.648842  | 0.538227  |
| C                                                         | 1.845434  | 2.249845  | -0.547580 |
| H                                                         | 1.960014  | 3.093159  | -1.246669 |
| H                                                         | 1.332936  | 1.471349  | -1.135110 |
| C                                                         | 3.211579  | 1.748465  | -0.052184 |
| H                                                         | 3.801534  | 2.616474  | 0.271757  |
| C                                                         | 4.004190  | 0.951823  | -1.120965 |
| H                                                         | 3.660979  | 1.242312  | -2.125014 |
| C                                                         | 3.934431  | -0.594889 | -0.986849 |
| H                                                         | 4.427846  | -1.040478 | -1.862367 |
| H                                                         | 4.512274  | -0.900222 | -0.107885 |
| H                                                         | 5.066142  | 1.230270  | -1.077504 |
| H                                                         | 3.066352  | 1.139226  | 0.847019  |
| O                                                         | 1.042834  | 2.403339  | 1.715605  |
| C                                                         | -1.664158 | 0.530678  | 0.296605  |
| H                                                         | -0.640460 | 0.482222  | 0.650477  |
| C                                                         | -2.256065 | -0.616802 | -0.217721 |
| C                                                         | -3.593151 | -0.610967 | -0.645914 |
| O                                                         | -4.171946 | -1.735490 | -1.151074 |
| H                                                         | -3.490797 | -2.426687 | -1.173005 |
| C                                                         | -4.316082 | 0.578907  | -0.556618 |
| H                                                         | -5.349438 | 0.585670  | -0.895307 |
| Sum of electronic and zero-point Energies= -1151.063728   |           |           |           |
| Sum of electronic and thermal Energies= -1151.041022      |           |           |           |
| Sum of electronic and thermal Enthalpies= -1151.040078    |           |           |           |
| Sum of electronic and thermal Free Energies= -1151.115533 |           |           |           |

myricatomentogenin-3-TS (benzene)

|   |           |           |           |
|---|-----------|-----------|-----------|
| C | -0.066737 | -2.958289 | 0.065526  |
| O | -0.057769 | -4.310550 | -0.083281 |
| H | 0.858727  | -4.598597 | 0.070997  |
| C | -1.274062 | -2.243865 | -0.060612 |
| C | -1.147694 | -0.881983 | 0.109734  |

|                                                           |           |           |           |
|-----------------------------------------------------------|-----------|-----------|-----------|
| H                                                         | -2.018540 | -0.270625 | 0.106012  |
| C                                                         | 0.033331  | -0.226860 | 0.301875  |
| H                                                         | -0.030859 | 0.835145  | 0.318577  |
| C                                                         | 1.226518  | -0.902206 | 0.489698  |
| O                                                         | 2.401470  | -0.184010 | 0.813636  |
| C                                                         | 1.171348  | -2.304697 | 0.368523  |
| O                                                         | 2.229845  | -3.172013 | 0.550540  |
| C                                                         | 3.456092  | -2.867436 | -0.121820 |
| H                                                         | 4.050862  | -3.786407 | -0.103295 |
| H                                                         | 3.273282  | -2.573420 | -1.164989 |
| H                                                         | 4.003710  | -2.075244 | 0.402769  |
| C                                                         | 1.405940  | 3.563038  | -0.635208 |
| H                                                         | 1.023252  | 4.436555  | -1.161738 |
| C                                                         | 0.716595  | 3.070918  | 0.488601  |
| C                                                         | -0.745180 | 3.438127  | 0.762165  |
| H                                                         | -0.885513 | 4.524594  | 0.700186  |
| H                                                         | -1.029242 | 3.137263  | 1.777476  |
| C                                                         | -1.754282 | 2.758610  | -0.248010 |
| H                                                         | -1.221855 | 2.250424  | -1.064927 |
| H                                                         | -2.345413 | 3.537208  | -0.754129 |
| C                                                         | -2.792168 | 1.765991  | 0.332812  |
| C                                                         | -3.823047 | 1.111590  | -0.642916 |
| H                                                         | -3.930302 | 1.779592  | -1.508741 |
| H                                                         | -4.771455 | 1.144897  | -0.090269 |
| C                                                         | -3.672101 | -0.345622 | -1.240142 |
| H                                                         | -4.501467 | -0.421743 | -1.956042 |
| C                                                         | -3.755693 | -1.585568 | -0.269533 |
| H                                                         | -3.755225 | -1.241411 | 0.773242  |
| C                                                         | -2.677916 | -2.715917 | -0.414203 |
| H                                                         | -2.690578 | -3.107928 | -1.443715 |
| H                                                         | -2.983275 | -3.558525 | 0.222358  |
| H                                                         | -4.732822 | -2.063102 | -0.418074 |
| H                                                         | -2.763194 | -0.391942 | -1.851087 |
| O                                                         | -2.876661 | 1.570056  | 1.529675  |
| C                                                         | 1.289534  | 1.974908  | 1.155660  |
| H                                                         | 0.801789  | 1.570784  | 2.039069  |
| C                                                         | 2.271640  | 1.196675  | 0.527902  |
| C                                                         | 2.928965  | 1.678553  | -0.609806 |
| O                                                         | 3.880776  | 0.944507  | -1.245400 |
| H                                                         | 3.965382  | 0.104388  | -0.767100 |
| C                                                         | 2.541506  | 2.920840  | -1.133852 |
| H                                                         | 3.065902  | 3.303330  | -2.006315 |
| Sum of electronic and zero-point Energies= -1150.986391   |           |           |           |
| Sum of electronic and thermal Energies= -1150.964804      |           |           |           |
| Sum of electronic and thermal Enthalpies= -1150.963859    |           |           |           |
| Sum of electronic and thermal Free Energies= -1151.035136 |           |           |           |

myricatomentogenin-3-E1 (benzene)

|   |           |           |           |
|---|-----------|-----------|-----------|
| C | -1.713034 | 2.046630  | 0.271157  |
| O | -2.381737 | 2.415574  | 1.398390  |
| H | -1.709522 | 2.764698  | 2.009242  |
| C | -2.407331 | 1.458325  | -0.794378 |
| C | -1.683486 | 1.164492  | -1.958886 |
| H | -2.208391 | 0.744517  | -2.814782 |
| C | -0.299228 | 1.302246  | -2.010151 |
| H | 0.267824  | 0.987848  | -2.882313 |
| C | 0.393945  | 1.743561  | -0.881204 |
| O | 1.781161  | 1.624521  | -0.846038 |
| C | -0.307414 | 2.189318  | 0.245213  |
| O | 0.215442  | 2.775630  | 1.374725  |
| C | 1.358594  | 2.203108  | 2.026453  |
| H | 1.385973  | 2.656192  | 3.022518  |
| H | 1.257737  | 1.115225  | 2.122237  |
| H | 2.283455  | 2.445433  | 1.494200  |
| C | 3.404166  | -2.054905 | 0.254132  |
| H | 3.866856  | -2.990357 | 0.564400  |
| C | 2.027331  | -2.011795 | 0.001820  |
| C | 1.159129  | -3.253347 | 0.131103  |
| H | 1.759641  | -4.045860 | 0.594070  |
| H | 0.884028  | -3.614680 | -0.870017 |

|   |           |           |           |
|---|-----------|-----------|-----------|
| C | -0.146689 | -3.085763 | 0.939537  |
| H | -0.039916 | -2.334163 | 1.736174  |
| H | -0.381776 | -4.022927 | 1.470025  |
| C | -1.400535 | -2.757105 | 0.126573  |
| C | -2.688788 | -2.523704 | 0.918377  |
| H | -2.548852 | -2.853828 | 1.955535  |
| H | -3.475898 | -3.148671 | 0.473967  |
| C | -3.131295 | -1.035278 | 0.906738  |
| H | -3.814182 | -0.870846 | 1.751488  |
| C | -3.813483 | -0.586941 | -0.400237 |
| H | -3.304423 | -1.057807 | -1.249942 |
| C | -3.823547 | 0.950666  | -0.623731 |
| H | -4.317447 | 1.455367  | 0.214244  |
| H | -4.413532 | 1.166400  | -1.525144 |
| H | -4.849155 | -0.958297 | -0.410832 |
| H | -2.252576 | -0.409283 | 1.107979  |
| O | -1.383335 | -2.697252 | -1.089899 |
| C | 1.466032  | -0.786661 | -0.393559 |
| H | 0.407843  | -0.731754 | -0.618565 |
| C | 2.257099  | 0.352717  | -0.517020 |
| C | 3.638709  | 0.299725  | -0.268824 |
| O | 4.408247  | 1.420883  | -0.372389 |
| H | 3.839538  | 2.138660  | -0.693392 |
| C | 4.204998  | -0.915298 | 0.113220  |
| H | 5.273513  | -0.950671 | 0.312614  |

Sum of electronic and zero-point Energies= -1151.058699  
Sum of electronic and thermal Energies= -1151.036246  
Sum of electronic and thermal Enthalpies= -1151.035302  
Sum of electronic and thermal Free Energies= -1151.109319

#### myricatomentogenin-3-E2 (benzene)

|   |           |           |           |
|---|-----------|-----------|-----------|
| C | -1.739786 | 1.889057  | -0.282951 |
| O | -2.542501 | 2.098123  | -1.359807 |
| H | -1.954624 | 2.315342  | -2.104125 |
| C | -2.292195 | 1.410157  | 0.916562  |
| C | -1.431887 | 1.257400  | 2.012170  |
| H | -1.847306 | 0.933331  | 2.964664  |
| C | -0.050453 | 1.419798  | 1.891172  |
| H | 0.618715  | 1.209732  | 2.721532  |
| C | 0.488479  | 1.752304  | 0.649231  |
| O | 1.862162  | 1.654291  | 0.436528  |
| C | -0.350759 | 2.064685  | -0.424011 |
| O | 0.086559  | 2.379844  | -1.689522 |
| C | 0.928114  | 3.537576  | -1.804203 |
| H | 1.075648  | 3.696768  | -2.876747 |
| H | 0.441283  | 4.419118  | -1.364257 |
| H | 1.896168  | 3.368905  | -1.321001 |
| C | 3.345499  | -2.204193 | -0.103271 |
| H | 3.763586  | -3.203488 | -0.214185 |
| C | 2.016183  | -1.964206 | -0.476108 |
| C | 1.135547  | -3.070925 | -1.032016 |
| H | 1.732566  | -3.988943 | -1.094803 |
| H | 0.830067  | -2.823014 | -2.057798 |
| C | -0.144426 | -3.374826 | -0.220690 |
| H | 0.013121  | -3.220954 | 0.857420  |
| H | -0.405429 | -4.441657 | -0.317063 |
| C | -1.401240 | -2.611710 | -0.639209 |
| C | -2.659894 | -2.860555 | 0.193740  |
| H | -2.500430 | -3.721571 | 0.854993  |
| H | -3.477050 | -3.117210 | -0.494813 |
| C | -3.056200 | -1.622844 | 1.042802  |
| H | -3.702959 | -1.962096 | 1.864427  |
| C | -3.771052 | -0.509740 | 0.252957  |
| H | -3.329113 | -0.425505 | -0.745980 |
| C | -3.710658 | 0.886706  | 0.933234  |
| H | -4.073799 | 0.819484  | 1.968401  |
| H | -4.383075 | 1.567180  | 0.396631  |
| H | -4.824174 | -0.792143 | 0.106580  |
| H | -2.149781 | -1.224494 | 1.517761  |
| O | -1.412175 | -1.853504 | -1.592777 |

|   |          |           |           |
|---|----------|-----------|-----------|
| C | 1.512356 | -0.663515 | -0.319961 |
| H | 0.494248 | -0.444527 | -0.622446 |
| C | 2.306585 | 0.345681  | 0.215096  |
| C | 3.638668 | 0.100523  | 0.584484  |
| O | 4.412103 | 1.090174  | 1.112202  |
| H | 3.853440 | 1.879618  | 1.194829  |
| C | 4.153223 | -1.184602 | 0.412346  |
| H | 5.183092 | -1.375931 | 0.704753  |

Sum of electronic and zero-point Energies= -1151.062797  
Sum of electronic and thermal Energies= -1151.040179  
Sum of electronic and thermal Enthalpies= -1151.039235  
Sum of electronic and thermal Free Energies= -1151.114306

#### myricatomentogenin-4-TS (benzene)

|   |           |           |           |
|---|-----------|-----------|-----------|
| C | 0.808721  | 2.823104  | -0.210381 |
| O | 1.152065  | 4.118480  | -0.443115 |
| H | 0.326406  | 4.632293  | -0.398649 |
| C | 1.791254  | 1.811836  | -0.241694 |
| C | 1.308198  | 0.545972  | 0.008259  |
| H | 1.988947  | -0.268471 | 0.074423  |
| C | -0.007318 | 0.228462  | 0.187616  |
| H | -0.221047 | -0.810851 | 0.268948  |
| C | -0.986733 | 1.201519  | 0.262311  |
| O | -2.324431 | 0.850511  | 0.543925  |
| C | -0.562102 | 2.529815  | 0.070522  |
| O | -1.414576 | 3.618813  | 0.064377  |
| C | -2.041311 | 3.907950  | 1.324875  |
| H | -2.713414 | 3.095162  | 1.623851  |
| H | -1.289156 | 4.069673  | 2.109775  |
| H | -2.619012 | 4.825563  | 1.174524  |
| C | -2.296241 | -3.126077 | -0.594340 |
| H | -2.136702 | -4.107010 | -1.040568 |
| C | -1.548321 | -2.745947 | 0.535648  |
| C | -0.249685 | -3.461013 | 0.922019  |
| H | -0.401187 | -4.547658 | 0.934890  |
| H | 0.057788  | -3.169662 | 1.933353  |
| C | 0.950250  | -3.150426 | -0.060494 |
| H | 0.608665  | -2.601638 | -0.949984 |
| H | 1.346069  | -4.095618 | -0.462669 |
| C | 2.179104  | -2.404439 | 0.516935  |
| C | 3.391954  | -2.124618 | -0.429644 |
| H | 3.359928  | -2.868065 | -1.238099 |
| H | 4.269811  | -2.357240 | 0.187878  |
| C | 3.664555  | -0.734765 | -1.136568 |
| H | 4.521711  | -0.940517 | -1.791534 |
| C | 4.022412  | 0.522483  | -0.253492 |
| H | 5.095310  | 0.721093  | -0.372894 |
| C | 3.282307  | 1.874783  | -0.546003 |
| H | 3.772562  | 2.662082  | 0.044113  |
| H | 3.436412  | 2.159986  | -1.598889 |
| H | 3.887010  | 0.279794  | 0.808920  |
| H | 2.835409  | -0.507672 | -1.816701 |
| O | 2.252840  | -2.130113 | 1.699025  |
| C | -1.838804 | -1.490382 | 1.095524  |
| H | -1.298091 | -1.160283 | 1.978883  |
| C | -2.553731 | -0.534918 | 0.361102  |
| C | -3.266149 | -0.912918 | -0.782694 |
| O | -3.958753 | -0.006190 | -1.519164 |
| H | -3.810793 | 0.866842  | -1.119562 |
| C | -3.199454 | -2.250539 | -1.201335 |
| H | -3.767212 | -2.549093 | -2.079387 |

Sum of electronic and zero-point Energies= -1150.987744  
Sum of electronic and thermal Energies= -1150.966153  
Sum of electronic and thermal Enthalpies= -1150.965209  
Sum of electronic and thermal Free Energies= -1151.036501

#### myricatomentogenin-4-E1 (benzene)

|   |          |          |           |
|---|----------|----------|-----------|
| C | 1.398322 | 2.026985 | -0.423971 |
| O | 1.939563 | 2.281447 | -1.648011 |
| H | 1.190684 | 2.412780 | -2.255085 |

|   |           |           |           |
|---|-----------|-----------|-----------|
| C | 2.227385  | 1.707009  | 0.661063  |
| C | 1.619079  | 1.519217  | 1.910608  |
| H | 2.247663  | 1.305961  | 2.773334  |
| C | 0.232176  | 1.496643  | 2.059073  |
| H | -0.232757 | 1.258417  | 3.011981  |
| C | -0.574064 | 1.659453  | 0.932784  |
| O | -1.931012 | 1.359428  | 1.003196  |
| C | -0.003945 | 1.998221  | -0.298448 |
| O | -0.695963 | 2.169092  | -1.474752 |
| C | -1.798926 | 3.087205  | -1.477085 |
| H | -2.701786 | 2.621843  | -1.069497 |
| H | -1.556543 | 3.993217  | -0.906248 |
| H | -1.971318 | 3.349438  | -2.525749 |
| C | -3.084879 | -2.395291 | -0.388328 |
| H | -3.422117 | -3.356654 | -0.772371 |
| C | -1.750739 | -2.236901 | 0.008414  |
| C | -0.761667 | -3.388458 | -0.068792 |
| H | -1.270847 | -4.249578 | -0.518600 |
| H | -0.469959 | -3.692200 | 0.946343  |
| C | 0.533853  | -3.114458 | -0.865137 |
| H | 0.361231  | -2.410322 | -1.693107 |
| H | 0.876993  | -4.041419 | -1.352788 |
| C | 1.728700  | -2.617413 | -0.051015 |
| C | 3.005687  | -2.308443 | -0.833692 |
| H | 2.931419  | -2.733016 | -1.842798 |
| H | 3.844785  | -2.802361 | -0.324509 |
| C | 3.273733  | -0.782695 | -0.935275 |
| H | 3.948093  | -0.604396 | -1.784036 |
| C | 3.879286  | -0.161313 | 0.338582  |
| H | 4.954066  | -0.394443 | 0.374321  |
| C | 3.690464  | 1.376381  | 0.456504  |
| H | 4.277213  | 1.734303  | 1.313399  |
| H | 4.082482  | 1.877369  | -0.436365 |
| H | 3.427856  | -0.633236 | 1.219918  |
| H | 2.334051  | -0.280471 | -1.194523 |
| O | 1.676971  | -2.480328 | 1.158620  |
| C | -1.351157 | -0.982305 | 0.496152  |
| H | -0.331186 | -0.837265 | 0.834455  |
| C | -2.255102 | 0.073831  | 0.559932  |
| C | -3.595064 | -0.097170 | 0.178676  |
| O | -4.479834 | 0.940729  | 0.252980  |
| H | -4.021393 | 1.682661  | 0.677950  |
| C | -4.002743 | -1.342639 | -0.295427 |
| H | -5.038836 | -1.470725 | -0.600027 |

Sum of electronic and zero-point Energies= -1151.062233  
Sum of electronic and thermal Energies= -1151.039700  
Sum of electronic and thermal Enthalpies= -1151.038756  
Sum of electronic and thermal Free Energies= -1151.112944

#### myricatomentogenin-4-E2 (benzene)

|   |           |           |           |
|---|-----------|-----------|-----------|
| C | 1.739826  | 1.889063  | 0.282921  |
| O | 2.542571  | 2.098190  | 1.359743  |
| H | 1.954693  | 2.315438  | 2.104050  |
| C | 2.292207  | 1.410124  | -0.916578 |
| C | 1.431898  | 1.257354  | -2.012190 |
| H | 1.847323  | 0.933275  | -2.964684 |
| C | 0.050475  | 1.419771  | -1.891170 |
| H | -0.618718 | 1.209705  | -2.721508 |
| C | -0.488444 | 1.752317  | -0.649223 |
| O | -1.862138 | 1.654312  | -0.436498 |
| C | 0.350798  | 2.064711  | 0.424005  |
| O | -0.086448 | 2.379905  | 1.689524  |
| C | -0.928198 | 3.537487  | 1.804282  |
| H | -0.441767 | 4.419011  | 1.363878  |
| H | -1.896433 | 3.368451  | 1.321572  |
| H | -1.075287 | 3.696930  | 2.876850  |
| C | -3.345513 | -2.204159 | 0.103261  |
| H | -3.763610 | -3.203450 | 0.214180  |
| C | -2.016203 | -1.964177 | 0.476123  |
| C | -1.135591 | -3.070904 | 1.032038  |

|   |           |           |           |
|---|-----------|-----------|-----------|
| H | -1.732631 | -3.988911 | 1.094782  |
| H | -0.830120 | -2.823017 | 2.057827  |
| C | 0.144390  | -3.734817 | 0.220727  |
| H | -0.013157 | -3.221056 | -0.857395 |
| H | 0.405420  | -4.441635 | 0.317217  |
| C | 1.401213  | -2.611695 | 0.639238  |
| C | 2.659844  | -2.860578 | -0.193722 |
| H | 2.500342  | -3.721620 | -0.854933 |
| H | 3.477024  | -3.117202 | 0.494809  |
| C | 3.056143  | -1.622886 | -1.042827 |
| H | 3.702924  | -1.962156 | -1.864425 |
| C | 3.771002  | -0.509794 | -0.252979 |
| H | 4.824118  | -0.792228 | -0.106593 |
| C | 3.710659  | 0.886662  | -0.933237 |
| H | 4.383091  | 1.567107  | -0.396620 |
| H | 4.073798  | 0.819448  | -1.968404 |
| H | 3.329055  | -0.425573 | 0.745954  |
| H | 2.149737  | -1.224538 | -1.517809 |
| O | 1.412163  | -1.853509 | 1.592818  |
| C | -1.512359 | -0.663497 | 0.319973  |
| H | -0.494244 | -0.444525 | 0.622453  |
| C | -2.306572 | 0.345697  | -0.215101 |
| C | -3.638649 | 0.100548  | -0.584520 |
| O | -4.412063 | 1.090209  | -1.112252 |
| H | -3.853396 | 1.879652  | -1.194875 |
| C | -4.153219 | -1.184570 | -0.412385 |
| H | -5.183081 | -1.375897 | -0.704816 |

Sum of electronic and zero-point Energies= -1151.062797  
Sum of electronic and thermal Energies= -1151.040179  
Sum of electronic and thermal Enthalpies= -1151.039235  
Sum of electronic and thermal Free Energies= -1151.114307

#### myricatomentogenin-5-TS (benzene)

|   |           |           |           |
|---|-----------|-----------|-----------|
| C | 2.792722  | 1.238030  | 0.154171  |
| O | 4.035352  | 1.760883  | -0.024952 |
| H | 4.656076  | 1.011893  | -0.002368 |
| C | 1.663568  | 2.078021  | 0.176298  |
| C | 0.471091  | 1.417131  | 0.374758  |
| H | -0.419597 | 1.987549  | 0.486140  |
| C | 0.328202  | 0.063441  | 0.411655  |
| H | -0.672595 | -0.297591 | 0.403327  |
| C | 1.417515  | -0.788861 | 0.467814  |
| O | 1.196586  | -2.170534 | 0.683652  |
| C | 2.682076  | -0.183461 | 0.338828  |
| O | 3.899788  | -0.828927 | 0.392941  |
| C | 4.038295  | -2.046107 | -0.348371 |
| H | 3.650024  | -1.932028 | -1.370395 |
| H | 5.111934  | -2.255397 | -0.389773 |
| H | 3.528429  | -2.873653 | 0.158074  |
| C | -2.777326 | -2.342818 | -0.447672 |
| H | -3.768997 | -2.204708 | -0.874053 |
| C | -2.461961 | -1.728728 | 0.777513  |
| C | -3.354839 | -0.634682 | 1.368201  |
| H | -3.454476 | -0.774911 | 2.453377  |
| H | -4.360373 | -0.714881 | 0.940997  |
| C | -2.867369 | 0.852541  | 1.165983  |
| H | -1.855077 | 0.989636  | 1.553795  |
| H | -3.506687 | 1.477560  | 1.811425  |
| C | -3.046908 | 1.462359  | -0.244850 |
| C | -2.069041 | 2.481359  | -0.927093 |
| H | -2.670080 | 2.886082  | -1.749233 |
| H | -1.336409 | 1.821698  | -1.414900 |
| C | -1.299239 | 3.675022  | -0.236329 |
| H | -1.898215 | 4.575519  | -0.422389 |
| C | 0.156437  | 3.966137  | -0.805840 |
| H | 0.211429  | 3.538135  | -1.817010 |
| C | 1.486011  | 3.574327  | -0.048085 |
| H | 2.317479  | 3.982594  | -0.636962 |
| H | 1.518656  | 4.104664  | 0.917277  |
| H | 0.223266  | 5.053479  | -0.944363 |

|                                                           |           |           |           |
|-----------------------------------------------------------|-----------|-----------|-----------|
| H                                                         | -1.279016 | 3.582607  | 0.857622  |
| O                                                         | -4.002781 | 1.102115  | -0.906302 |
| C                                                         | -1.174627 | -1.963837 | 1.296660  |
| H                                                         | -0.873517 | -1.489058 | 2.228352  |
| C                                                         | -0.169013 | -2.507052 | 0.484384  |
| C                                                         | -0.495898 | -3.098826 | -0.742104 |
| O                                                         | 0.461346  | -3.617802 | -1.554993 |
| H                                                         | 1.316880  | -3.482771 | -1.117033 |
| C                                                         | -1.832301 | -3.081515 | -1.162989 |
| H                                                         | -2.085839 | -3.547199 | -2.112258 |
| Sum of electronic and zero-point Energies= -1150.975043   |           |           |           |
| Sum of electronic and thermal Energies= -1150.953560      |           |           |           |
| Sum of electronic and thermal Enthalpies= -1150.952616    |           |           |           |
| Sum of electronic and thermal Free Energies= -1151.023971 |           |           |           |

myricatomentogenin-5-E1 (benzene)

|                                                           |           |           |           |
|-----------------------------------------------------------|-----------|-----------|-----------|
| C                                                         | -2.084927 | -1.721350 | 0.159353  |
| O                                                         | -2.964885 | -1.922569 | 1.176251  |
| H                                                         | -2.455611 | -2.311370 | 1.908790  |
| C                                                         | -2.522384 | -1.101533 | -1.020041 |
| C                                                         | -1.597844 | -0.978922 | -2.066864 |
| H                                                         | -1.926311 | -0.551662 | -3.012293 |
| C                                                         | -0.259987 | -1.330774 | -1.904767 |
| H                                                         | 0.465722  | -1.161329 | -2.695757 |
| C                                                         | 0.189255  | -1.804786 | -0.669763 |
| O                                                         | 1.558284  | -1.902941 | -0.432465 |
| C                                                         | -0.727465 | -2.062305 | 0.357858  |
| O                                                         | -0.467481 | -2.625366 | 1.582301  |
| C                                                         | 0.683454  | -2.210900 | 2.335490  |
| H                                                         | 0.796745  | -1.119938 | 2.319296  |
| H                                                         | 0.496428  | -2.542038 | 3.361755  |
| H                                                         | 1.594197  | -2.685710 | 1.958465  |
| C                                                         | 3.693429  | 1.671478  | -0.134380 |
| H                                                         | 4.286929  | 2.582378  | -0.071841 |
| C                                                         | 2.292905  | 1.753335  | -0.185576 |
| C                                                         | 1.580939  | 3.101590  | -0.185394 |
| H                                                         | 2.051959  | 3.739145  | -0.946372 |
| H                                                         | 1.739632  | 3.612124  | 0.774576  |
| C                                                         | 0.057170  | 3.070271  | -0.447413 |
| H                                                         | -0.198479 | 2.390572  | -1.268076 |
| H                                                         | -0.250493 | 4.074761  | -0.775262 |
| C                                                         | -0.777242 | 2.785117  | 0.809441  |
| C                                                         | -1.915749 | 1.768281  | 0.765979  |
| H                                                         | -2.396546 | 1.804653  | 1.751200  |
| H                                                         | -1.441981 | 0.779835  | 0.684105  |
| C                                                         | -2.986490 | 1.896629  | -0.340651 |
| H                                                         | -3.462004 | 2.883123  | -0.251543 |
| C                                                         | -4.081367 | 0.800140  | -0.233708 |
| H                                                         | -4.179169 | 0.494220  | 0.815576  |
| C                                                         | -3.893891 | -0.470483 | -1.111472 |
| H                                                         | -4.672955 | -1.190379 | -0.825558 |
| H                                                         | -4.078857 | -0.205557 | -2.161271 |
| H                                                         | -5.050596 | 1.234981  | -0.514146 |
| H                                                         | -2.519932 | 1.869267  | -1.335294 |
| O                                                         | -0.506576 | 3.357519  | 1.849594  |
| C                                                         | 1.578452  | 0.554496  | -0.267620 |
| H                                                         | 0.500061  | 0.572669  | -0.316969 |
| C                                                         | 2.225203  | -0.678476 | -0.330754 |
| C                                                         | 3.622857  | -0.753402 | -0.279225 |
| O                                                         | 4.270412  | -1.951431 | -0.333121 |
| H                                                         | 3.602798  | -2.643848 | -0.459861 |
| C                                                         | 4.348162  | 0.437363  | -0.174055 |
| H                                                         | 5.433543  | 0.377784  | -0.138643 |
| Sum of electronic and zero-point Energies= -1151.053828   |           |           |           |
| Sum of electronic and thermal Energies= -1151.031187      |           |           |           |
| Sum of electronic and thermal Enthalpies= -1151.030242    |           |           |           |
| Sum of electronic and thermal Free Energies= -1151.105379 |           |           |           |

myricatomentogenin-5-E2 (benzene)

|   |          |           |          |
|---|----------|-----------|----------|
| C | 2.026023 | -1.549778 | 0.378960 |
|---|----------|-----------|----------|

|                                                           |           |           |           |
|-----------------------------------------------------------|-----------|-----------|-----------|
| O                                                         | 2.836274  | -1.533402 | 1.473511  |
| H                                                         | 2.301920  | -1.868971 | 2.214150  |
| C                                                         | 2.484303  | -1.050440 | -0.849288 |
| C                                                         | 1.615381  | -1.133031 | -1.947648 |
| H                                                         | 1.964045  | -0.791889 | -2.920859 |
| C                                                         | 0.290857  | -1.547957 | -1.809628 |
| H                                                         | -0.400974 | -1.514601 | -2.647481 |
| C                                                         | -0.183184 | -1.909586 | -0.547253 |
| O                                                         | -1.558322 | -2.050361 | -0.327383 |
| C                                                         | 0.699075  | -1.997728 | 0.531554  |
| O                                                         | 0.329796  | -2.321806 | 1.819252  |
| C                                                         | -0.310179 | -3.596341 | 2.001930  |
| H                                                         | 0.312123  | -4.403740 | 1.592605  |
| H                                                         | -0.416502 | -3.725787 | 3.083216  |
| H                                                         | -1.296745 | -3.610501 | 1.528148  |
| C                                                         | -3.320173 | 1.718286  | -0.000290 |
| H                                                         | -3.763615 | 2.712286  | 0.020117  |
| C                                                         | -2.192975 | 1.446682  | 0.789809  |
| C                                                         | -1.553287 | 2.503117  | 1.677676  |
| H                                                         | -1.825641 | 2.323048  | 2.728672  |
| H                                                         | -1.953570 | 3.490475  | 1.417555  |
| C                                                         | -0.005195 | 2.574912  | 1.599598  |
| H                                                         | 0.445014  | 1.604132  | 1.836081  |
| H                                                         | 0.338444  | 3.285398  | 2.364234  |
| C                                                         | 0.493260  | 3.098645  | 0.248016  |
| C                                                         | 1.344395  | 2.189792  | -0.631621 |
| H                                                         | 1.374655  | 2.653056  | -1.625605 |
| H                                                         | 0.834950  | 1.222627  | -0.724071 |
| C                                                         | 2.795993  | 1.974701  | -0.130833 |
| H                                                         | 3.243633  | 2.963437  | 0.040242  |
| C                                                         | 3.689362  | 1.201223  | -1.138269 |
| H                                                         | 3.333668  | 1.407010  | -2.157939 |
| C                                                         | 3.814799  | -0.334298 | -0.940054 |
| H                                                         | 4.402460  | -0.734229 | -1.779107 |
| H                                                         | 4.392677  | -0.531663 | -0.030978 |
| H                                                         | 4.708868  | 1.608978  | -1.090663 |
| H                                                         | 2.797423  | 1.463980  | 0.842291  |
| O                                                         | 0.191208  | 4.222307  | -0.110795 |
| C                                                         | -1.652987 | 0.156412  | 0.729393  |
| H                                                         | -0.801127 | -0.110191 | 1.344773  |
| C                                                         | -2.171102 | -0.798761 | -0.138161 |
| C                                                         | -3.301615 | -0.526596 | -0.919739 |
| O                                                         | -3.808155 | -1.457399 | -1.773179 |
| H                                                         | -3.241004 | -2.243235 | -1.709675 |
| C                                                         | -3.883524 | 0.741487  | -0.826585 |
| H                                                         | -4.752475 | 0.961203  | -1.442356 |
| Sum of electronic and zero-point Energies= -1151.055251   |           |           |           |
| Sum of electronic and thermal Energies= -1151.032544      |           |           |           |
| Sum of electronic and thermal Enthalpies= -1151.031600    |           |           |           |
| Sum of electronic and thermal Free Energies= -1151.107280 |           |           |           |

myricatomentogenin-6-TS (benzene)

|   |           |           |           |
|---|-----------|-----------|-----------|
| C | 1.120240  | 2.767136  | -0.039484 |
| O | 1.576674  | 4.038370  | 0.121216  |
| H | 0.812735  | 4.624472  | -0.019222 |
| C | 2.005783  | 1.676964  | 0.052426  |
| C | 1.415259  | 0.447554  | -0.129233 |
| H | 2.043669  | -0.407211 | -0.181341 |
| C | 0.075893  | 0.233107  | -0.281379 |
| H | -0.234050 | -0.786968 | -0.293867 |
| C | -0.809609 | 1.284300  | -0.452681 |
| O | -2.161301 | 1.027776  | -0.778091 |
| C | -0.270580 | 2.580653  | -0.328751 |
| O | -0.965807 | 3.761681  | -0.496205 |
| C | -2.217203 | 3.897240  | 0.184702  |
| H | -2.446685 | 4.967788  | 0.192158  |
| H | -3.012159 | 3.364629  | -0.350565 |
| H | -2.147611 | 3.533340  | 1.219398  |
| C | -2.621672 | -2.883240 | 0.509215  |
| H | -2.605559 | -3.858480 | 0.994368  |

|   |           |           |           |
|---|-----------|-----------|-----------|
| C | -1.756397 | -2.629936 | -0.571920 |
| C | -0.533770 | -3.512577 | -0.838590 |
| H | -0.092199 | -3.281506 | -1.815586 |
| H | -0.827335 | -4.569413 | -0.866960 |
| C | 0.584714  | -3.352861 | 0.268388  |
| H | 0.925968  | -4.358549 | 0.562227  |
| H | 0.160914  | -2.917340 | 1.181178  |
| C | 1.896667  | -2.606544 | -0.097832 |
| C | 2.674349  | -1.972238 | 1.083673  |
| H | 2.988022  | -2.826481 | 1.709088  |
| H | 1.953311  | -1.430272 | 1.708378  |
| C | 3.974974  | -1.121285 | 0.846654  |
| H | 4.347298  | -0.908418 | 1.859707  |
| C | 4.133578  | 0.206844  | 0.002549  |
| H | 5.218846  | 0.380184  | 0.027465  |
| C | 3.491453  | 1.594254  | 0.371719  |
| H | 4.054350  | 2.366345  | -0.171401 |
| H | 3.657099  | 1.809487  | 1.439725  |
| H | 3.901658  | -0.009946 | -1.048214 |
| H | 4.712635  | -1.804022 | 0.402949  |
| O | 2.311210  | -2.578371 | -1.239589 |
| C | -1.864240 | -1.374191 | -1.190796 |
| H | -1.236385 | -1.142461 | -2.046941 |
| C | -2.525407 | -0.319015 | -0.546543 |
| C | -3.357293 | -0.575337 | 0.549201  |
| O | -4.009981 | 0.426367  | 1.196199  |
| H | -3.765989 | 1.258711  | 0.760759  |
| C | -3.464693 | -1.893398 | 1.017451  |
| H | -4.127153 | -2.095065 | 1.855845  |

Sum of electronic and zero-point Energies= -1150.985326  
Sum of electronic and thermal Energies= -1150.963847  
Sum of electronic and thermal Enthalpies= -1150.962903  
Sum of electronic and thermal Free Energies= -1151.033579

#### myricatomentogenin-6-E2 (benzene)

|   |           |           |           |
|---|-----------|-----------|-----------|
| C | 1.424746  | 1.797999  | 0.502494  |
| O | 1.961047  | 1.889201  | 1.753151  |
| H | 1.211578  | 2.009340  | 2.362242  |
| C | 2.250827  | 1.554070  | -0.603087 |
| C | 1.644207  | 1.513447  | -1.867633 |
| H | 2.271544  | 1.366730  | -2.744919 |
| C | 0.259234  | 1.565200  | -2.025532 |
| H | -0.206392 | 1.437095  | -2.999076 |
| C | -0.550076 | 1.668811  | -0.894819 |
| O | -1.918767 | 1.435733  | -0.999016 |
| C | 0.024810  | 1.857442  | 0.366117  |
| O | -0.672329 | 1.949488  | 1.548291  |
| C | -1.717903 | 2.929858  | 1.630966  |
| H | -1.917259 | 3.068036  | 2.698217  |
| H | -1.396536 | 3.882495  | 1.189554  |
| H | -2.629420 | 2.580572  | 1.135686  |
| C | -3.186318 | -2.328191 | 0.267809  |
| H | -3.546857 | -3.288470 | 0.632877  |
| C | -1.840409 | -2.182209 | -0.090668 |
| C | -0.838696 | -3.316301 | 0.042450  |
| H | -0.461268 | -3.612319 | -0.946247 |
| H | -1.349714 | -4.192107 | 0.460717  |
| C | 0.382397  | -2.978723 | 0.928486  |
| H | 0.798610  | -3.911369 | 1.545099  |
| H | 0.090458  | -2.373260 | 1.796641  |
| C | 1.566763  | -2.319018 | 0.208397  |
| C | 2.518446  | -1.527707 | 1.096939  |
| H | 2.632011  | -2.092899 | 2.035527  |
| H | 1.994230  | -0.609469 | 1.397631  |
| C | 3.917868  | -1.217131 | 0.533036  |
| H | 4.521108  | -0.829727 | 1.367692  |
| C | 4.073638  | -0.255440 | -0.664813 |
| H | 5.134046  | -0.299658 | -0.953844 |
| C | 3.725067  | 1.244389  | -0.444830 |
| H | 4.284561  | 1.826151  | -1.190934 |

|   |           |           |           |
|---|-----------|-----------|-----------|
| H | 4.081658  | 1.573181  | 0.538391  |
| H | 3.505425  | -0.641196 | -1.518666 |
| H | 4.382534  | -2.171131 | 0.244274  |
| O | 1.743809  | -2.462256 | -0.987797 |
| C | -1.415255 | -0.928652 | -0.554253 |
| H | -0.386290 | -0.790948 | -0.865475 |
| C | -2.294390 | 0.146786  | -0.611476 |
| C | -3.644806 | -0.007498 | -0.263353 |
| O | -4.507674 | 1.049403  | -0.323413 |
| H | -4.027474 | 1.796916  | -0.712868 |
| C | -4.084437 | -1.258137 | 0.168995  |
| H | -5.129522 | -1.374483 | 0.446405  |

Sum of electronic and zero-point Energies= -1151.061800  
Sum of electronic and thermal Energies= -1151.039265  
Sum of electronic and thermal Enthalpies= -1151.038321  
Sum of electronic and thermal Free Energies= -1151.112743

#### myricatomentogenin-6-E1 (benzene)

|   |           |           |           |
|---|-----------|-----------|-----------|
| C | 1.684216  | 1.845792  | -0.278125 |
| O | 2.440978  | 2.154055  | -1.363932 |
| H | 1.823605  | 2.444521  | -2.057730 |
| C | 2.288856  | 1.272424  | 0.853451  |
| C | 1.478376  | 1.041808  | 1.972893  |
| H | 1.935863  | 0.651615  | 2.880479  |
| C | 0.093836  | 1.220892  | 1.929910  |
| H | -0.537764 | 0.952638  | 2.772815  |
| C | -0.499683 | 1.655804  | 0.745401  |
| O | -1.881972 | 1.578571  | 0.587936  |
| C | 0.291856  | 2.038944  | -0.340989 |
| O | -0.198354 | 2.460397  | -1.554624 |
| C | -1.036694 | 3.626437  | -1.536773 |
| H | -1.221999 | 3.878726  | -2.585248 |
| H | -1.987541 | 3.419382  | -1.034874 |
| H | -0.528625 | 4.464430  | -1.039765 |
| C | -3.394475 | -2.205866 | -0.297238 |
| H | -3.820068 | -3.189141 | -0.490903 |
| C | -2.033855 | -1.978274 | -0.537504 |
| C | -1.104241 | -3.072055 | -1.034740 |
| H | -0.724695 | -2.828433 | -2.036910 |
| H | -1.674859 | -4.003758 | -1.131724 |
| C | 0.116571  | -3.323985 | -0.119743 |
| H | 0.467586  | -4.360377 | -0.258837 |
| H | -0.157455 | -3.243696 | 0.940131  |
| C | 1.353509  | -2.461246 | -0.408394 |
| C | 2.284617  | -2.229573 | 0.775191  |
| H | 2.312666  | -3.162286 | 1.359685  |
| H | 1.770424  | -1.508192 | 1.427527  |
| C | 3.727464  | -1.785971 | 0.465030  |
| H | 4.303758  | -1.885599 | 1.397801  |
| C | 3.991591  | -0.384199 | -0.125746 |
| H | 5.056012  | -0.363131 | -0.401920 |
| C | 3.738773  | 0.845358  | 0.792638  |
| H | 4.344821  | 1.676223  | 0.407069  |
| H | 4.103364  | 0.635177  | 1.808221  |
| H | 3.432325  | -0.264035 | -1.058393 |
| H | 4.159685  | -2.519155 | -0.231342 |
| O | 1.577869  | -2.025293 | -1.522553 |
| C | -1.524809 | -0.698533 | -0.272247 |
| H | -0.481405 | -0.484781 | -0.472163 |
| C | -2.338156 | 0.301774  | 0.247933  |
| C | -3.702541 | 0.069669  | 0.485103  |
| O | -4.501650 | 1.047327  | 0.997804  |
| H | -3.940653 | 1.818011  | 1.178689  |
| C | -4.223710 | -1.191886 | 0.197565  |
| H | -5.279011 | -1.372460 | 0.388643  |

Sum of electronic and zero-point Energies= -1151.061606  
Sum of electronic and thermal Energies= -1151.039035  
Sum of electronic and thermal Enthalpies= -1151.038090  
Sum of electronic and thermal Free Energies= -1151.112781

## galeon-1-TS (benzene)

|   |           |           |           |
|---|-----------|-----------|-----------|
| C | -0.110924 | 3.095523  | -0.009765 |
| H | -0.170653 | 4.168222  | -0.174468 |
| C | 1.130857  | 2.431465  | -0.119114 |
| C | 1.103930  | 1.074115  | 0.098970  |
| H | 2.005991  | 0.517401  | 0.067273  |
| C | -0.038112 | 0.373767  | 0.371553  |
| H | 0.082116  | -0.681543 | 0.472994  |
| C | -1.265487 | 0.986855  | 0.496920  |
| O | -2.419337 | 0.232091  | 0.800192  |
| C | -1.304201 | 2.390704  | 0.301192  |
| O | -2.534691 | 2.968389  | 0.409145  |
| C | -2.639674 | 4.373700  | 0.235443  |
| H | -3.697341 | 4.613241  | 0.380299  |
| H | -2.335288 | 4.682681  | -0.775434 |
| H | -2.040801 | 4.919820  | 0.978685  |
| C | -1.359435 | -3.475244 | -0.703167 |
| H | -0.967984 | -4.342824 | -1.233268 |
| C | -0.697865 | -3.007695 | 0.447595  |
| C | 0.742193  | -3.418340 | 0.764928  |
| H | 0.852608  | -4.506992 | 0.682687  |
| H | 1.003094  | -3.147651 | 1.795064  |
| C | 1.793618  | -2.752401 | -0.205425 |
| H | 1.303796  | -2.408160 | -1.125129 |
| H | 2.510015  | -3.520381 | -0.539445 |
| C | -1.279267 | -1.918731 | 1.116903  |
| H | -0.823225 | -1.541789 | 2.029020  |
| C | -2.250254 | -1.131749 | 0.483933  |
| C | -2.881403 | -1.590317 | -0.678522 |
| O | -3.818865 | -0.838140 | -1.310482 |
| H | -3.894335 | -0.002906 | -0.818302 |
| C | -2.479307 | -2.819766 | -1.220545 |
| H | -2.980087 | -3.184252 | -2.114386 |
| C | 2.675474  | -1.604083 | 0.345282  |
| C | 3.494324  | -0.786572 | -0.699541 |
| H | 2.922938  | -0.735440 | -1.635374 |
| H | 4.357101  | -1.432514 | -0.929202 |
| C | 4.028655  | 0.640958  | -0.288818 |
| H | 3.888171  | 0.771665  | 0.791887  |
| C | 3.481635  | 1.893321  | -1.094225 |
| H | 4.361944  | 2.461485  | -1.422462 |
| C | 2.524239  | 2.959321  | -0.442648 |
| H | 2.995736  | 3.354510  | 0.471712  |
| H | 2.469578  | 3.809831  | -1.137383 |
| H | 3.003247  | 1.535552  | -2.017361 |
| H | 5.115134  | 0.623826  | -0.435729 |
| O | 2.775927  | -1.392684 | 1.536473  |

Sum of electronic and zero-point Energies= -1075.784143

Sum of electronic and thermal Energies= -1075.763522

Sum of electronic and thermal Enthalpies= -1075.762578

Sum of electronic and thermal Free Energies= -1075.832663

## galeon-1-E1 (benzene)

|   |           |           |           |
|---|-----------|-----------|-----------|
| C | 1.606334  | -1.980999 | 0.481887  |
| H | 1.954726  | -2.250175 | 1.475539  |
| C | 2.534297  | -1.504916 | -0.464597 |
| C | 2.091280  | -1.212682 | -1.757427 |
| H | 2.800579  | -0.876940 | -2.510677 |
| C | 0.728060  | -1.272659 | -2.072439 |
| H | 0.362919  | -0.978801 | -3.053665 |
| C | -0.190774 | -1.632708 | -1.099178 |
| O | -1.555550 | -1.513402 | -1.340208 |
| C | 0.244241  | -2.052807 | 0.176882  |
| O | -0.735377 | -2.456610 | 1.028361  |
| C | -0.368445 | -2.816415 | 2.354544  |
| H | -1.299881 | -3.095236 | 2.855055  |
| H | 0.090825  | -1.972019 | 2.888045  |
| H | 0.319665  | -3.673653 | 2.363699  |
| C | -3.336875 | 1.765420  | 0.516318  |
| H | -3.820032 | 2.597201  | 1.026828  |

|   |           |           |           |
|---|-----------|-----------|-----------|
| C | -2.084060 | 1.955321  | -0.082150 |
| C | -1.338831 | 3.274048  | 0.020444  |
| H | -2.005146 | 4.028812  | 0.456072  |
| H | -1.050255 | 3.639620  | -0.974099 |
| C | -0.054336 | 3.190024  | 0.882435  |
| H | -0.238408 | 2.621464  | 1.802461  |
| H | 0.234151  | 4.206631  | 1.195547  |
| C | -1.497653 | 0.861312  | -0.737803 |
| H | -0.537768 | 0.973664  | -1.232495 |
| C | -2.120847 | -0.381228 | -0.745439 |
| C | -3.365649 | -0.571283 | -0.125509 |
| O | -3.951676 | -1.797297 | -0.110998 |
| H | -3.299167 | -2.422485 | -0.468751 |
| C | -3.979464 | 0.522502  | 0.487049  |
| H | -4.944402 | 0.377542  | 0.967319  |
| C | 1.170586  | 2.636348  | 0.143522  |
| C | 2.058475  | 1.671602  | 0.918026  |
| H | 1.454423  | 0.757297  | 1.034134  |
| H | 2.187618  | 2.053465  | 1.942655  |
| C | 3.414243  | 1.348183  | 0.270359  |
| H | 3.272468  | 1.257957  | -0.812914 |
| C | 4.087197  | 0.070766  | 0.836889  |
| H | 5.160482  | 0.252191  | 0.985608  |
| C | 3.958589  | -1.198128 | -0.051386 |
| H | 4.568205  | -1.058368 | -0.954158 |
| H | 4.396045  | -2.046858 | 0.494408  |
| H | 3.681920  | -0.147726 | 1.835734  |
| H | 4.080523  | 2.209812  | 0.411159  |
| O | 1.404140  | 2.956859  | -1.007414 |

Sum of electronic and zero-point Energies= -1075.855156

Sum of electronic and thermal Energies= -1075.833793

Sum of electronic and thermal Enthalpies= -1075.832849

Sum of electronic and thermal Free Energies= -1075.905209

## galeon-1-E2 (benzene)

|   |           |           |           |
|---|-----------|-----------|-----------|
| C | -1.808652 | -1.622339 | 0.758379  |
| H | -2.283251 | -1.512372 | 1.728861  |
| C | -2.599393 | -1.527405 | -0.398832 |
| C | -1.993529 | -1.710130 | -1.648458 |
| H | -2.593067 | -1.675030 | -2.556232 |
| C | -0.606059 | -1.865331 | -1.742720 |
| H | -0.111596 | -1.936924 | -2.708878 |
| C | 0.177117  | -1.868524 | -0.594638 |
| O | 1.561472  | -1.865617 | -0.700541 |
| C | -0.422726 | -1.802389 | 0.679714  |
| O | 0.419507  | -1.864170 | 1.739403  |
| C | -0.109241 | -1.613257 | 3.037542  |
| H | 0.745477  | -1.659699 | 3.718119  |
| H | -0.844245 | -2.377125 | 3.328566  |
| H | -0.567131 | -0.616279 | 3.095736  |
| C | 3.587161  | 1.711888  | -0.021840 |
| H | 4.153060  | 2.626190  | 0.150502  |
| C | 2.188062  | 1.762882  | -0.092713 |
| C | 1.434659  | 3.068422  | 0.116696  |
| H | 2.055022  | 3.896384  | -0.250504 |
| H | 1.294255  | 3.245625  | 1.193123  |
| C | 0.047144  | 3.152836  | -0.549587 |
| H | 0.072486  | 2.769501  | -1.577759 |
| H | -0.241453 | 4.213437  | -0.629473 |
| C | 1.503526  | 0.563474  | -0.326166 |
| H | 0.423658  | 0.556085  | -0.395448 |
| C | 2.181964  | -0.643261 | -0.461115 |
| C | 3.581508  | -0.689143 | -0.376639 |
| O | 4.253700  | -1.867433 | -0.506164 |
| H | 3.592199  | -2.571115 | -0.600901 |
| C | 4.276055  | 0.502409  | -0.161709 |
| H | 5.361489  | 0.465090  | -0.103372 |
| C | -1.094004 | 2.492070  | 0.235168  |
| C | -2.207826 | 1.868856  | -0.599297 |
| H | -1.747614 | 1.032026  | -1.146543 |

|   |           |           |           |
|---|-----------|-----------|-----------|
| H | -2.492320 | 2.586269  | -1.385353 |
| C | -3.441441 | 1.390851  | 0.182455  |
| H | -3.112441 | 0.957398  | 1.134526  |
| C | -4.316803 | 0.378620  | -0.598088 |
| H | -5.377550 | 0.569017  | -0.383935 |
| C | -4.053662 | -1.119785 | -0.279676 |
| H | -4.402319 | -1.325417 | 0.741570  |
| H | -4.676121 | -1.727561 | -0.951658 |
| H | -4.195757 | 0.543706  | -1.678736 |
| H | -4.045462 | 2.267785  | 0.451193  |
| O | -1.103489 | 2.483289  | 1.451770  |

Sum of electronic and zero-point Energies= -1075.854672

Sum of electronic and thermal Energies= -1075.833358

Sum of electronic and thermal Enthalpies= -1075.832414

Sum of electronic and thermal Free Energies= -1075.904056

#### galeon-2-TS (benzene)

|   |           |           |           |
|---|-----------|-----------|-----------|
| C | -0.164455 | 3.077293  | -0.056700 |
| H | -0.218680 | 4.153106  | -0.201837 |
| C | 1.080439  | 2.413783  | -0.158635 |
| C | 1.044394  | 1.053467  | 0.041454  |
| H | 1.941068  | 0.482349  | 0.051447  |
| C | -0.111817 | 0.353713  | 0.245992  |
| H | 0.000912  | -0.704472 | 0.289979  |
| C | -1.334446 | 0.966639  | 0.401262  |
| O | -2.482516 | 0.207667  | 0.718126  |
| C | -1.361986 | 2.376767  | 0.246902  |
| O | -2.583842 | 2.964422  | 0.388926  |
| C | -2.674677 | 4.375863  | 0.264939  |
| H | -2.383144 | 4.716081  | -0.739685 |
| H | -2.057066 | 4.889139  | 1.016236  |
| H | -3.726931 | 4.622360  | 0.435283  |
| C | -1.278399 | -3.522370 | -0.598931 |
| H | -0.843884 | -4.389429 | -1.095239 |
| C | -0.633515 | -2.966434 | 0.521604  |
| C | 0.840131  | -3.250595 | 0.830251  |
| H | 1.038021  | -4.329344 | 0.795810  |
| H | 1.087641  | -2.913477 | 1.843807  |
| C | 1.834849  | -2.542236 | -0.175163 |
| H | 1.294295  | -2.078315 | -1.012816 |
| H | 2.473157  | -3.300835 | -0.653551 |
| C | -1.271246 | -1.881681 | 1.147370  |
| H | -0.817765 | -1.429068 | 2.025826  |
| C | -2.278904 | -1.169986 | 0.482496  |
| C | -2.892528 | -1.714862 | -0.651584 |
| O | -3.863648 | -1.039684 | -1.319194 |
| H | -3.974888 | -0.182658 | -0.874028 |
| C | -2.435645 | -2.950756 | -1.133892 |
| H | -2.923739 | -3.382046 | -2.004740 |
| C | 2.811422  | -1.487207 | 0.402510  |
| C | 3.836753  | -0.809798 | -0.565364 |
| H | 4.005822  | -1.499604 | -1.403918 |
| H | 4.767306  | -0.775452 | 0.016691  |
| C | 3.633178  | 0.616962  | -1.219120 |
| H | 4.487518  | 0.713867  | -1.902506 |
| C | 3.608715  | 1.893129  | -0.292208 |
| H | 3.596538  | 1.586178  | 0.761904  |
| C | 2.467202  | 2.948304  | -0.508493 |
| H | 2.713538  | 3.835813  | 0.092735  |
| H | 2.480543  | 3.288819  | -1.556449 |
| H | 4.558554  | 2.425745  | -0.430572 |
| H | 2.750017  | 0.593315  | -1.867917 |
| O | 2.859302  | -1.257658 | 1.595317  |

Sum of electronic and zero-point Energies= -1075.776490

Sum of electronic and thermal Energies= -1075.756137

Sum of electronic and thermal Enthalpies= -1075.755193

Sum of electronic and thermal Free Energies= -1075.823966

#### galeon-2-E1 (benzene)

|   |           |          |          |
|---|-----------|----------|----------|
| C | -1.280743 | 2.166700 | 0.571158 |
|---|-----------|----------|----------|

|   |           |           |           |
|---|-----------|-----------|-----------|
| H | -1.639036 | 2.340530  | 1.581935  |
| C | -2.213316 | 1.908667  | -0.448649 |
| C | -1.754446 | 1.747688  | -1.760969 |
| H | -2.464635 | 1.582700  | -2.568792 |
| C | -0.383343 | 1.676108  | -2.024551 |
| H | -0.011987 | 1.451399  | -3.021679 |
| C | 0.527722  | 1.782825  | -0.982732 |
| O | 1.863891  | 1.451855  | -1.183215 |
| C | 0.094157  | 2.111152  | 0.317231  |
| O | 1.073818  | 2.276327  | 1.245074  |
| C | 0.691137  | 2.530172  | 2.590481  |
| H | 0.105736  | 1.698324  | 3.007752  |
| H | 0.115676  | 3.462862  | 2.677209  |
| H | 1.624969  | 2.629185  | 3.151032  |
| C | 2.964137  | -2.257845 | 0.367858  |
| H | 3.280485  | -3.209413 | 0.792759  |
| C | 1.685562  | -2.141378 | -0.193985 |
| C | 0.709032  | -3.305431 | -0.196004 |
| H | 1.237524  | -4.204329 | 0.144773  |
| H | 0.366372  | -3.508540 | -1.219408 |
| C | -0.541531 | -3.110534 | 0.691736  |
| H | -0.305085 | -2.536319 | 1.599791  |
| H | -0.896905 | -4.087354 | 1.060859  |
| C | 1.316187  | -0.901585 | -0.739608 |
| H | 0.338278  | -0.786680 | -1.195950 |
| C | 2.185767  | 0.183272  | -0.689355 |
| C | 3.458965  | 0.065339  | -0.110170 |
| O | 4.289821  | 1.139812  | -0.041217 |
| H | 3.778676  | 1.908248  | -0.345439 |
| C | 3.847176  | -1.172522 | 0.403622  |
| H | 4.833256  | -1.264536 | 0.853121  |
| C | -1.756129 | -2.475119 | 0.015510  |
| C | -2.954453 | -2.170243 | 0.917463  |
| H | -2.812547 | -2.650993 | 1.893526  |
| H | -3.849027 | -2.612316 | 0.457024  |
| C | -3.163314 | -0.644799 | 1.117118  |
| H | -3.744401 | -0.492238 | 2.037707  |
| C | -3.872077 | 0.057326  | -0.057104 |
| H | -3.517233 | -0.372744 | -1.001306 |
| C | -3.655667 | 1.596000  | -0.108796 |
| H | -4.328553 | 2.016067  | -0.868847 |
| H | -3.937094 | 2.048509  | 0.852770  |
| H | -4.950778 | -0.151765 | -0.001288 |
| H | -2.184436 | -0.181337 | 1.296719  |
| O | -1.786054 | -2.237245 | -1.178865 |

Sum of electronic and zero-point Energies= -1075.853224

Sum of electronic and thermal Energies= -1075.831981

Sum of electronic and thermal Enthalpies= -1075.831036

Sum of electronic and thermal Free Energies= -1075.902761

#### galeon-2-E2 (benzene)

|   |           |           |           |
|---|-----------|-----------|-----------|
| C | -1.673393 | 2.006508  | -0.530639 |
| H | -2.256044 | 2.061792  | -1.445858 |
| C | -2.330986 | 1.712224  | 0.676683  |
| C | -1.587102 | 1.670025  | 1.860511  |
| H | -2.084673 | 1.484460  | 2.810262  |
| C | -0.191391 | 1.759577  | 1.815348  |
| H | 0.409193  | 1.627661  | 2.712626  |
| C | 0.456612  | 1.919680  | 0.598708  |
| O | 1.834801  | 1.759374  | 0.523436  |
| C | -0.280106 | 2.118711  | -0.587262 |
| O | 0.444887  | 2.325361  | -1.714047 |
| C | -0.243836 | 2.358616  | -2.959052 |
| H | -0.956345 | 3.194706  | -3.004363 |
| H | -0.770869 | 1.413387  | -3.150099 |
| H | 0.528286  | 2.502980  | -3.720011 |
| C | 3.288574  | -2.104270 | -0.044001 |
| H | 3.706092  | -3.102538 | -0.165782 |
| C | 1.924082  | -1.889792 | -0.273576 |
| C | 1.008538  | -3.018956 | -0.718814 |



|                                                           |           |           |           |
|-----------------------------------------------------------|-----------|-----------|-----------|
| H                                                         | 1.571297  | -3.959071 | -0.666734 |
| H                                                         | 0.735782  | -2.877359 | -1.774356 |
| C                                                         | -0.301504 | -3.185530 | 0.082815  |
| H                                                         | -0.175229 | -2.888015 | 1.134770  |
| H                                                         | -0.582016 | -4.250664 | 0.125729  |
| C                                                         | 1.422150  | -0.590151 | -0.101058 |
| H                                                         | 0.373077  | -0.394763 | -0.289273 |
| C                                                         | 2.255566  | 0.451048  | 0.296919  |
| C                                                         | 3.626454  | 0.230522  | 0.513860  |
| O                                                         | 4.442994  | 1.250092  | 0.901797  |
| H                                                         | 3.895626  | 2.048265  | 0.973965  |
| C                                                         | 4.134086  | -1.055845 | 0.338516  |
| H                                                         | 5.193469  | -1.224784 | 0.517620  |
| C                                                         | -1.529649 | -2.467375 | -0.476479 |
| C                                                         | -2.820781 | -2.591330 | 0.335740  |
| H                                                         | -2.707024 | -3.379565 | 1.090596  |
| H                                                         | -3.623079 | -2.899687 | -0.349025 |
| C                                                         | -3.208940 | -1.261703 | 1.036303  |
| H                                                         | -3.904940 | -1.493963 | 1.854715  |
| C                                                         | -3.846694 | -0.213959 | 0.103617  |
| H                                                         | -3.350680 | -0.252253 | -0.873632 |
| C                                                         | -3.770704 | 1.244023  | 0.636483  |
| H                                                         | -4.371023 | 1.887386  | -0.021808 |
| H                                                         | -4.220120 | 1.303183  | 1.637596  |
| H                                                         | -4.900343 | -0.478649 | -0.069163 |
| H                                                         | -2.312304 | -0.844708 | 1.513090  |
| O                                                         | -1.495680 | -1.838570 | -1.519758 |
| Sum of electronic and zero-point Energies= -1075.852924   |           |           |           |
| Sum of electronic and thermal Energies= -1075.831591      |           |           |           |
| Sum of electronic and thermal Enthalpies= -1075.830647    |           |           |           |
| Sum of electronic and thermal Free Energies= -1075.902970 |           |           |           |

#### galeon-3-TS (benzene)

|   |           |           |           |
|---|-----------|-----------|-----------|
| C | -0.767101 | 3.012545  | 0.084928  |
| H | -1.025919 | 4.056911  | 0.238330  |
| C | -1.766063 | 2.015013  | 0.152167  |
| C | -1.336312 | 0.727619  | -0.056193 |
| H | -2.050826 | -0.053962 | -0.120378 |
| C | -0.023295 | 0.382941  | -0.219593 |
| H | 0.179279  | -0.664156 | -0.256347 |
| C | 0.968601  | 1.328750  | -0.360262 |
| O | 2.288540  | 0.946046  | -0.680198 |
| C | 0.585136  | 2.686184  | -0.203065 |
| O | 1.589034  | 3.600734  | -0.326920 |
| C | 1.269550  | 4.977891  | -0.196908 |
| H | 2.208779  | 5.517198  | -0.352052 |
| H | 0.880740  | 5.212808  | 0.804956  |
| H | 0.539658  | 5.298104  | -0.954646 |
| C | 2.311777  | -3.029055 | 0.472859  |
| H | 2.186207  | -4.011662 | 0.926358  |
| C | 1.488054  | -2.649752 | -0.604076 |
| C | 0.177148  | -3.382663 | -0.905647 |
| H | 0.350674  | -4.464577 | -0.962999 |
| H | -0.224914 | -3.075781 | -1.878889 |
| C | -0.929519 | -3.129790 | 0.196551  |
| H | -0.471513 | -2.754000 | 1.119254  |
| H | -1.372110 | -4.100459 | 0.472463  |
| C | 1.735941  | -1.393278 | -1.180018 |
| H | 1.141131  | -1.066779 | -2.029189 |
| C | 2.501317  | -0.436583 | -0.498922 |
| C | 3.290154  | -0.815086 | 0.593497  |
| O | 4.032379  | 0.095776  | 1.274345  |
| H | 3.861844  | 0.963693  | 0.870812  |
| C | 3.251412  | -2.151723 | 1.018732  |
| H | 3.878369  | -2.450248 | 1.855612  |
| C | -2.156958 | -2.248727 | -0.164002 |
| C | -2.894736 | -1.583439 | 1.027861  |
| H | -2.138759 | -1.162444 | 1.702288  |
| H | -3.330158 | -2.423877 | 1.596476  |
| C | -4.078451 | -0.572750 | 0.800125  |

|                                                           |           |           |           |
|-----------------------------------------------------------|-----------|-----------|-----------|
| H                                                         | -4.876787 | -1.140682 | 0.303031  |
| C                                                         | -4.055529 | 0.804199  | 0.020504  |
| H                                                         | -3.826277 | 0.610299  | -1.035169 |
| C                                                         | -3.257394 | 2.085483  | 0.467082  |
| H                                                         | -3.728094 | 2.946688  | -0.029341 |
| H                                                         | -3.402224 | 2.252991  | 1.546760  |
| H                                                         | -5.112698 | 1.105535  | 0.035715  |
| H                                                         | -4.454893 | -0.365848 | 1.812892  |
| O                                                         | -2.546691 | -2.142109 | -1.309685 |
| Sum of electronic and zero-point Energies= -1075.775605   |           |           |           |
| Sum of electronic and thermal Energies= -1075.755231      |           |           |           |
| Sum of electronic and thermal Enthalpies= -1075.754287    |           |           |           |
| Sum of electronic and thermal Free Energies= -1075.823191 |           |           |           |

#### galeon-3-E1 (benzene)

|   |           |           |           |
|---|-----------|-----------|-----------|
| C | -1.593551 | 1.925734  | -0.534836 |
| H | -2.107296 | 2.024096  | -1.486818 |
| C | -2.337418 | 1.584112  | 0.609042  |
| C | -1.681813 | 1.502901  | 1.841547  |
| H | -2.246650 | 1.282828  | 2.745401  |
| C | -0.286555 | 1.609138  | 1.905053  |
| H | 0.247364  | 1.448482  | 2.839053  |
| C | 0.448037  | 1.826720  | 0.748176  |
| O | 1.829701  | 1.678675  | 0.764856  |
| C | -0.202882 | 2.054896  | -0.482665 |
| O | 0.600499  | 2.309325  | -1.544193 |
| C | 0.005668  | 2.379074  | -2.835475 |
| H | 0.830917  | 2.551483  | -3.532063 |
| H | -0.707432 | 3.212709  | -2.907016 |
| H | -0.499222 | 1.438186  | -3.094949 |
| C | 3.332941  | -2.077798 | -0.242939 |
| H | 3.764310  | -3.048035 | -0.484201 |
| C | 1.943500  | -1.907236 | -0.269588 |
| C | 0.997730  | -3.036277 | -0.647377 |
| H | 1.542813  | -3.986449 | -0.586299 |
| H | 0.678701  | -2.929261 | -1.694551 |
| C | -0.276777 | -3.131662 | 0.219467  |
| H | -0.059841 | -2.912229 | 1.272870  |
| H | -0.646472 | -4.170503 | 0.202835  |
| C | 1.432351  | -0.643605 | 0.057287  |
| H | 0.362884  | -0.476796 | 0.037467  |
| C | 2.272681  | 0.410375  | 0.399959  |
| C | 3.666240  | 0.236063  | 0.413079  |
| O | 4.496255  | 1.264585  | 0.745304  |
| H | 3.943467  | 2.044833  | 0.910027  |
| C | 4.185534  | -1.017354 | 0.089247  |
| H | 5.264755  | -1.150872 | 0.109159  |
| C | -1.475163 | -2.296722 | -0.253877 |
| C | -2.457850 | -1.883849 | 0.836269  |
| H | -1.955143 | -1.104764 | 1.428226  |
| H | -2.556533 | -2.736295 | 1.526400  |
| C | -3.861306 | -1.434965 | 0.386426  |
| H | -4.274328 | -2.221747 | -0.260939 |
| C | -4.032760 | -0.092694 | -0.357103 |
| H | -3.400435 | -0.089908 | -1.252267 |
| C | -3.798948 | 1.213830  | 0.451366  |
| H | -4.323216 | 2.026029  | -0.073319 |
| H | -4.272992 | 1.129049  | 1.439408  |
| H | -5.072347 | -0.068066 | -0.715187 |
| H | -4.500689 | -1.418179 | 1.282175  |
| O | -1.637776 | -2.023670 | -1.428936 |

Sum of electronic and zero-point Energies= -1075.852131  
Sum of electronic and thermal Energies= -1075.830778  
Sum of electronic and thermal Enthalpies= -1075.829834  
Sum of electronic and thermal Free Energies= -1075.902144

#### galeon-3-E2 (benzene)

|   |           |          |           |
|---|-----------|----------|-----------|
| C | -1.414514 | 1.960688 | 0.598592  |
| H | -1.818132 | 2.079509 | 1.600451  |
| C | -2.292007 | 1.669444 | -0.459641 |

|   |           |           |           |
|---|-----------|-----------|-----------|
| C | -1.778825 | 1.585081  | -1.759496 |
| H | -2.448316 | 1.402801  | -2.597585 |
| C | -0.399461 | 1.631379  | -1.978486 |
| H | 0.019754  | 1.470087  | -2.968957 |
| C | 0.468044  | 1.782321  | -0.905396 |
| O | 1.831773  | 1.565519  | -1.076273 |
| C | -0.030876 | 2.022901  | 0.390747  |
| O | 0.900644  | 2.231769  | 1.357150  |
| C | 0.454944  | 2.423797  | 2.693395  |
| H | 1.358957  | 2.586590  | 3.286957  |
| H | -0.072781 | 1.538002  | 3.075372  |
| H | -0.198127 | 3.303976  | 2.778744  |
| C | 3.163644  | -2.157622 | 0.246960  |
| H | 3.538019  | -3.108931 | 0.622013  |
| C | 1.841475  | -2.060921 | -0.204185 |
| C | 0.873076  | -3.228679 | -0.135173 |
| H | 1.414032  | -4.121215 | 0.202536  |
| H | 0.470249  | -3.459323 | -1.130858 |
| C | -0.324344 | -2.983298 | 0.813426  |
| H | -0.005517 | -2.455336 | 1.721366  |
| H | -0.722823 | -3.953375 | 1.155823  |
| C | 1.399111  | -0.818505 | -0.682796 |
| H | 0.387794  | -0.718684 | -1.061576 |
| C | 2.233708  | 0.293516  | -0.664302 |
| C | 3.555538  | 0.193996  | -0.201287 |
| O | 4.364066  | 1.288180  | -0.169099 |
| H | 3.819228  | 2.052041  | -0.420308 |
| C | 4.017215  | -1.047170 | 0.238028  |
| H | 5.040210  | -1.122801 | 0.599478  |
| C | -1.535106 | -2.273900 | 0.190925  |
| C | -2.385396 | -1.455629 | 1.155331  |
| H | -1.812905 | -0.537407 | 1.354602  |
| H | -2.401466 | -1.990693 | 2.117218  |
| C | -3.833040 | -1.138516 | 0.732979  |
| H | -4.323104 | -2.088622 | 0.475725  |
| C | -4.100443 | -0.156831 | -0.428240 |
| H | -3.599447 | -0.517563 | -1.333433 |
| C | -3.750016 | 1.341799  | -0.203735 |
| H | -4.374881 | 1.933622  | -0.887883 |
| H | -4.037003 | 1.643594  | 0.813761  |
| H | -5.180152 | -0.209496 | -0.630765 |
| H | -4.356506 | -0.766054 | 1.626853  |
| O | -1.805662 | -2.393448 | -0.989955 |

Sum of electronic and zero-point Energies= -1075.851657  
Sum of electronic and thermal Energies= -1075.830434  
Sum of electronic and thermal Enthalpies= -1075.829490  
Sum of electronic and thermal Free Energies= -1075.900966

#### galeon-4-TS (benzene)

|   |           |           |           |
|---|-----------|-----------|-----------|
| C | -0.197866 | 3.145470  | -0.244558 |
| H | -0.198082 | 4.212852  | -0.460653 |
| C | -1.378705 | 2.378212  | -0.275291 |
| C | -1.216383 | 1.041063  | 0.019022  |
| H | -2.065320 | 0.405530  | 0.052460  |
| C | -0.010202 | 0.456227  | 0.278065  |
| H | -0.034688 | -0.599232 | 0.433279  |
| C | 1.165687  | 1.181778  | 0.312046  |
| O | 2.393445  | 0.538795  | 0.587086  |
| C | 1.063629  | 2.567387  | 0.049134  |
| O | 2.173654  | 3.375833  | -0.006853 |
| C | 2.855909  | 3.562399  | 1.237104  |
| H | 3.687392  | 4.243946  | 1.029508  |
| H | 3.249983  | 2.616820  | 1.630782  |
| H | 2.190553  | 4.019120  | 1.984676  |
| C | 1.583741  | -3.326958 | -0.655552 |
| H | 1.243262  | -4.254570 | -1.114303 |
| C | 0.942910  | -2.849225 | 0.502982  |
| C | -0.436345 | -3.363102 | 0.921875  |
| H | -0.672002 | -3.048297 | 1.945495  |
| H | -0.450143 | -4.460330 | 0.913316  |

|   |           |           |           |
|---|-----------|-----------|-----------|
| C | -1.588623 | -2.859702 | -0.030776 |
| H | -2.255186 | -3.705667 | -0.264359 |
| H | -1.178470 | -2.550093 | -1.000395 |
| C | 1.460463  | -1.677890 | 1.078157  |
| H | 1.019324  | -1.286989 | 1.991779  |
| C | 2.328174  | -0.852345 | 0.351170  |
| C | 2.935122  | -1.322475 | -0.819303 |
| O | 3.770540  | -0.537593 | -1.546514 |
| H | 3.795119  | 0.334539  | -1.118273 |
| C | 2.613760  | -2.611607 | -1.269563 |
| H | 3.097884  | -2.984140 | -2.169159 |
| C | -2.532764 | -1.746186 | 0.486532  |
| C | -3.461263 | -1.070387 | -0.567165 |
| H | -4.270804 | -1.802169 | -0.720226 |
| H | -2.932492 | -1.029315 | -1.528323 |
| C | -4.104274 | 0.328457  | -0.219401 |
| H | -5.189815 | 0.208859  | -0.316595 |
| C | -3.701509 | 1.569292  | -1.121846 |
| H | -3.222980 | 1.197065  | -2.039205 |
| C | -2.825412 | 2.756110  | -0.573568 |
| H | -2.871772 | 3.563017  | -1.318577 |
| H | -3.299692 | 3.163555  | 0.333823  |
| H | -4.640272 | 2.033966  | -1.450610 |
| H | -3.934108 | 0.539036  | 0.844340  |
| O | -2.593137 | -1.459112 | 1.664634  |

Sum of electronic and zero-point Energies= -1075.782130  
Sum of electronic and thermal Energies= -1075.761436  
Sum of electronic and thermal Enthalpies= -1075.760492  
Sum of electronic and thermal Free Energies= -1075.830289

#### galeon-4-E1 (benzene)

|   |           |           |           |
|---|-----------|-----------|-----------|
| C | -1.666206 | 2.017811  | -0.634777 |
| H | -2.075136 | 2.245980  | -1.617403 |
| C | -2.506510 | 1.649342  | 0.424590  |
| C | -1.929021 | 1.423283  | 1.682337  |
| H | -2.560534 | 1.173625  | 2.532279  |
| C | -0.542536 | 1.450706  | 1.841773  |
| H | -0.082334 | 1.204841  | 2.796098  |
| C | 0.285153  | 1.706235  | 0.750822  |
| O | 1.659800  | 1.524100  | 0.883252  |
| C | -0.273146 | 2.051175  | -0.495576 |
| O | 0.452133  | 2.329139  | -1.615920 |
| C | 1.588068  | 3.193701  | -1.509995 |
| H | 1.722452  | 3.631882  | -2.504692 |
| H | 2.495814  | 2.645707  | -1.236263 |
| H | 1.409059  | 3.997636  | -0.783702 |
| C | 3.266543  | -2.145075 | -0.264716 |
| H | 3.721894  | -3.080948 | -0.584251 |
| C | 1.892287  | -2.098582 | 0.000191  |
| C | 1.014863  | -3.331405 | -0.142884 |
| H | 0.725888  | -3.712747 | 0.846950  |
| H | 1.601760  | -4.124031 | -0.622905 |
| C | -0.283700 | -3.109477 | -0.951405 |
| H | -0.637418 | -4.081601 | -1.331522 |
| H | -0.100294 | -2.483640 | -1.833645 |
| C | 1.341548  | -0.871724 | 0.404438  |
| H | 0.286773  | -0.799501 | 0.642720  |
| C | 2.134578  | 0.264994  | 0.514798  |
| C | 3.514626  | 0.206384  | 0.261730  |
| O | 4.292737  | 1.322507  | 0.373889  |
| H | 3.729485  | 2.036813  | 0.711388  |
| C | 4.073618  | -1.009819 | -0.125976 |
| H | 5.140754  | -1.049971 | -0.331524 |
| C | -1.456814 | -2.553024 | -0.135207 |
| C | -2.373166 | -1.571402 | -0.852377 |
| H | -2.617305 | -1.982040 | -1.844851 |
| H | -1.750564 | -0.688694 | -1.065281 |
| C | -3.644947 | -1.169486 | -0.089393 |
| H | -4.364028 | -1.997319 | -0.148743 |
| C | -4.300778 | 0.130757  | -0.619868 |

|                                                           |           |           |           |
|-----------------------------------------------------------|-----------|-----------|-----------|
| H                                                         | -4.009358 | 0.290439  | -1.668179 |
| C                                                         | -3.985718 | 1.413230  | 0.197547  |
| H                                                         | -4.435433 | 2.271772  | -0.321994 |
| H                                                         | -4.486862 | 1.340271  | 1.172233  |
| H                                                         | -5.393458 | 0.017125  | -0.628968 |
| H                                                         | -3.400990 | -1.067523 | 0.974962  |
| O                                                         | -1.631245 | -2.884973 | 1.022653  |
| Sum of electronic and zero-point Energies= -1075.851697   |           |           |           |
| Sum of electronic and thermal Energies= -1075.830144      |           |           |           |
| Sum of electronic and thermal Enthalpies= -1075.829199    |           |           |           |
| Sum of electronic and thermal Free Energies= -1075.901733 |           |           |           |

galeon-4-E2 (benzene)

|                                                           |           |           |           |
|-----------------------------------------------------------|-----------|-----------|-----------|
| C                                                         | -1.808433 | 1.622197  | 0.758616  |
| H                                                         | -2.282868 | 1.512163  | 1.729172  |
| C                                                         | -2.599411 | 1.527498  | -0.398471 |
| C                                                         | -1.993794 | 1.710429  | -1.648172 |
| H                                                         | -2.593513 | 1.675539  | -2.555835 |
| C                                                         | -0.606325 | 1.865593  | -1.742694 |
| H                                                         | -0.112069 | 1.937353  | -2.708945 |
| C                                                         | 0.177081  | 1.868529  | -0.594780 |
| O                                                         | 1.561404  | 1.865571  | -0.700952 |
| C                                                         | -0.422534 | 1.802210  | 0.679692  |
| O                                                         | 0.419907  | 1.863808  | 1.739218  |
| C                                                         | -0.108547 | 1.612516  | 3.037374  |
| H                                                         | 0.746314  | 1.658654  | 3.717795  |
| H                                                         | -0.566520 | 0.615564  | 3.095383  |
| H                                                         | -0.843442 | 2.376351  | 3.328793  |
| C                                                         | 3.587054  | -1.711861 | -0.021758 |
| H                                                         | 4.152930  | -2.626150 | 0.150746  |
| C                                                         | 2.187974  | -1.762912 | -0.093057 |
| C                                                         | 1.434559  | -3.068477 | 0.116161  |
| H                                                         | 1.294242  | -3.245868 | 1.192568  |
| H                                                         | 2.054869  | -3.896384 | -0.251249 |
| C                                                         | 0.046985  | -3.152700 | -0.550000 |
| H                                                         | -0.241689 | -4.213267 | -0.630068 |
| H                                                         | 0.072223  | -2.769182 | -1.578106 |
| C                                                         | 1.503482  | -0.563528 | -0.326717 |
| H                                                         | 0.423639  | -0.556131 | -0.396364 |
| C                                                         | 2.181925  | 0.643237  | -0.461379 |
| C                                                         | 3.581427  | 0.689189  | -0.376452 |
| O                                                         | 4.253612  | 1.867518  | -0.505666 |
| H                                                         | 3.592116  | 2.571185  | -0.600580 |
| C                                                         | 4.275951  | -0.502360 | -0.161379 |
| H                                                         | 5.361364  | -0.465002 | -0.102692 |
| C                                                         | -1.094033 | -2.491990 | 0.235006  |
| C                                                         | -2.207973 | -1.868697 | -0.599269 |
| H                                                         | -2.492563 | -2.585999 | -1.385378 |
| H                                                         | -1.747818 | -1.031783 | -1.146446 |
| C                                                         | -3.441476 | -1.390748 | 0.182691  |
| H                                                         | -4.045488 | -2.267682 | 0.451449  |
| C                                                         | -4.316914 | -0.378420 | -0.597647 |
| H                                                         | -4.195995 | -0.543392 | -1.678327 |
| C                                                         | -4.053685 | 1.119939  | -0.279122 |
| H                                                         | -4.676225 | 1.727805  | -0.950946 |
| H                                                         | -4.402177 | 1.325475  | 0.742200  |
| H                                                         | -5.377642 | -0.568809 | -0.383389 |
| H                                                         | -3.112305 | -0.957379 | 1.134741  |
| O                                                         | -1.103333 | -2.483263 | 1.451602  |
| Sum of electronic and zero-point Energies= -1075.854671   |           |           |           |
| Sum of electronic and thermal Energies= -1075.833358      |           |           |           |
| Sum of electronic and thermal Enthalpies= -1075.832413    |           |           |           |
| Sum of electronic and thermal Free Energies= -1075.904051 |           |           |           |

galeon-5-TS (benzene)

|   |           |          |           |
|---|-----------|----------|-----------|
| C | -3.088690 | 0.606933 | -0.010035 |
| H | -4.141978 | 0.811132 | 0.163940  |
| C | -2.152534 | 1.668364 | -0.010440 |
| C | -0.846784 | 1.305061 | -0.235167 |
| H | -0.086800 | 2.043415 | -0.300169 |

|                                                           |           |           |           |
|-----------------------------------------------------------|-----------|-----------|-----------|
| C                                                         | -0.433688 | 0.005395  | -0.326984 |
| H                                                         | 0.621633  | -0.138177 | -0.314965 |
| C                                                         | -1.315349 | -1.048535 | -0.393735 |
| O                                                         | -0.837863 | -2.360227 | -0.619542 |
| C                                                         | -2.691153 | -0.737866 | -0.237388 |
| O                                                         | -3.549106 | -1.796967 | -0.290303 |
| C                                                         | -4.935334 | -1.553922 | -0.107001 |
| H                                                         | -5.334964 | -0.878892 | -0.878050 |
| H                                                         | -5.146924 | -1.134586 | 0.887724  |
| H                                                         | -5.423120 | -2.529311 | -0.196081 |
| C                                                         | 3.157449  | -1.833864 | 0.337341  |
| H                                                         | 4.131457  | -1.547563 | 0.731170  |
| C                                                         | 2.653540  | -1.204961 | -0.815476 |
| C                                                         | 3.246698  | 0.075751  | -1.404773 |
| H                                                         | 2.660629  | 0.349665  | -2.291401 |
| H                                                         | 4.272339  | -0.094350 | -1.763903 |
| C                                                         | 3.374943  | 1.353825  | -0.474946 |
| H                                                         | 3.773704  | 2.149094  | -1.119509 |
| H                                                         | 4.146837  | 1.137000  | 0.275336  |
| C                                                         | 1.410018  | -1.652282 | -1.290555 |
| H                                                         | 0.978099  | -1.188251 | -2.174070 |
| C                                                         | 0.567601  | -2.428767 | -0.484864 |
| C                                                         | 1.070237  | -3.024733 | 0.676887  |
| O                                                         | 0.275056  | -3.766450 | 1.489221  |
| H                                                         | -0.623172 | -3.734192 | 1.118932  |
| C                                                         | 2.406934  | -2.783500 | 1.032769  |
| H                                                         | 2.796307  | -3.254058 | 1.932358  |
| C                                                         | 2.194568  | 1.923311  | 0.363449  |
| C                                                         | 1.567248  | 3.290202  | -0.039765 |
| H                                                         | 1.371803  | 3.281296  | -1.122826 |
| H                                                         | 2.390219  | 4.014244  | 0.076229  |
| C                                                         | 0.315921  | 3.785342  | 0.784988  |
| H                                                         | 0.167542  | 3.087214  | 1.617159  |
| C                                                         | -1.047123 | 4.025396  | 0.009466  |
| H                                                         | -1.353770 | 5.061387  | 0.203759  |
| C                                                         | -2.318129 | 3.150106  | 0.315194  |
| H                                                         | -3.160252 | 3.595571  | -0.235718 |
| H                                                         | -2.575561 | 3.256885  | 1.381166  |
| H                                                         | -0.857482 | 3.979581  | -1.073096 |
| O                                                         | 0.596975  | 4.739872  | 1.246233  |
| O                                                         | 1.859193  | 1.356830  | 1.383372  |
| Sum of electronic and zero-point Energies= -1075.771435   |           |           |           |
| Sum of electronic and thermal Energies= -1075.751132      |           |           |           |
| Sum of electronic and thermal Enthalpies= -1075.750188    |           |           |           |
| Sum of electronic and thermal Free Energies= -1075.818546 |           |           |           |

galeon-5-E1 (benzene)

|   |           |           |           |
|---|-----------|-----------|-----------|
| C | 2.118071  | 1.843169  | -0.253725 |
| H | 2.789319  | 2.100469  | -1.068681 |
| C | 2.596117  | 1.036219  | 0.794565  |
| C | 1.743634  | 0.744613  | 1.864737  |
| H | 2.104955  | 0.156654  | 2.705207  |
| C | 0.401983  | 1.131407  | 1.820288  |
| H | -0.291682 | 0.828714  | 2.601385  |
| C | -0.089654 | 1.830043  | 0.725521  |
| O | -1.465874 | 1.996078  | 0.570784  |
| C | 0.778686  | 2.253504  | -0.301238 |
| O | 0.217206  | 2.974802  | -1.305278 |
| C | 1.049732  | 3.387832  | -2.381063 |
| H | 1.464942  | 2.527723  | -2.926344 |
| H | 1.871123  | 4.030357  | -2.033152 |
| H | 0.403802  | 3.960759  | -3.052445 |
| C | -3.446675 | -1.524713 | -0.475565 |
| H | -3.979588 | -2.447106 | -0.701372 |
| C | -2.128071 | -1.352222 | -0.919493 |
| C | -1.360093 | -2.425148 | -1.668973 |
| H | -0.673332 | -1.953790 | -2.385171 |
| H | -2.055435 | -3.030328 | -2.265910 |
| C | -0.567990 | -3.408876 | -0.764942 |
| H | -0.119262 | -4.175548 | -1.418287 |

|   |           |           |           |
|---|-----------|-----------|-----------|
| H | -1.253127 | -3.923924 | -0.081780 |
| C | -1.488006 | -0.146849 | -0.611938 |
| H | -0.478116 | 0.026580  | -0.964537 |
| C | -2.107418 | 0.828662  | 0.161210  |
| C | -3.428622 | 0.654185  | 0.599035  |
| O | -4.049049 | 1.605003  | 1.349998  |
| H | -3.405743 | 2.314665  | 1.508966  |
| C | -4.094607 | -0.527544 | 0.261490  |
| H | -5.117173 | -0.660880 | 0.606918  |
| C | 0.573028  | -2.858709 | 0.098478  |
| C | 1.677623  | -2.033237 | -0.567228 |
| H | 1.287641  | -1.010180 | -0.654428 |
| H | 1.828346  | -2.379457 | -1.600324 |
| C | 3.005955  | -2.014681 | 0.212416  |
| H | 2.777342  | -1.948783 | 1.282173  |
| C | 3.981760  | -0.883396 | -0.199503 |
| H | 5.010571  | -1.268971 | -0.178597 |
| C | 3.959652  | 0.385449  | 0.699004  |
| H | 4.697932  | 1.097639  | 0.303438  |
| H | 4.299177  | 0.105709  | 1.705631  |
| H | 3.793965  | -0.588835 | -1.242762 |
| H | 3.499085  | -2.986737 | 0.074317  |
| O | 0.609544  | -3.112507 | 1.287909  |

Sum of electronic and zero-point Energies= -1075.848275

Sum of electronic and thermal Energies= -1075.826808

Sum of electronic and thermal Enthalpies= -1075.825864

Sum of electronic and thermal Free Energies= -1075.898569

#### galeon-5-E2 (benzene)

|   |           |           |           |
|---|-----------|-----------|-----------|
| C | -1.691348 | -1.570653 | 0.777496  |
| H | -2.076020 | -1.351882 | 1.768916  |
| C | -2.569208 | -1.532488 | -0.319105 |
| C | -2.081241 | -1.866704 | -1.588407 |
| H | -2.753716 | -1.880811 | -2.444263 |
| C | -0.713714 | -2.098593 | -1.780696 |
| H | -0.305955 | -2.275519 | -2.773502 |
| C | 0.162664  | -2.012273 | -0.706567 |
| O | 1.540057  | -1.992546 | -0.921358 |
| C | -0.325255 | -1.810661 | 0.601280  |
| O | 0.604693  | -1.802949 | 1.588357  |
| C | 0.212494  | -1.338262 | 2.878848  |
| H | -0.520747 | -2.013293 | 3.342722  |
| H | -0.196017 | -0.320582 | 2.823916  |
| H | 1.126153  | -1.334357 | 3.479791  |
| C | 3.174724  | 1.779483  | -0.201987 |
| H | 3.610689  | 2.750033  | 0.030372  |
| C | 1.918269  | 1.708240  | -0.820728 |
| C | 1.071558  | 2.932415  | -1.112491 |
| H | 0.425402  | 2.735083  | -1.978437 |
| H | 1.712997  | 3.778689  | -1.393049 |
| C | 0.200817  | 3.403622  | 0.086142  |
| H | -0.341999 | 4.310609  | -0.226346 |
| H | 0.845064  | 3.677863  | 0.929347  |
| C | 1.404973  | 0.439429  | -1.113252 |
| H | 0.449010  | 0.347085  | -1.617882 |
| C | 2.078250  | -0.716530 | -0.735687 |
| C | 3.325072  | -0.642055 | -0.099982 |
| O | 3.976184  | -1.769494 | 0.290163  |
| H | 3.363703  | -2.511377 | 0.154226  |
| C | 3.877978  | 0.619619  | 0.139714  |
| H | 4.846260  | 0.675930  | 0.631683  |
| C | -0.842450 | 2.426488  | 0.634783  |
| C | -1.905280 | 1.868726  | -0.314633 |
| H | -1.451474 | 0.990665  | -0.794389 |
| H | -2.094539 | 2.584824  | -1.127001 |
| C | -3.218812 | 1.458391  | 0.379619  |
| H | -2.972468 | 1.001951  | 1.345002  |
| C | -4.121197 | 0.509134  | -0.448237 |
| H | -5.173905 | 0.770852  | -0.271928 |
| C | -3.976962 | -1.006876 | -0.134045 |

|   |           |           |           |
|---|-----------|-----------|-----------|
| H | -4.674702 | -1.556903 | -0.781038 |
| H | -4.302902 | -1.181089 | 0.900805  |
| H | -3.947355 | 0.671279  | -1.522193 |
| H | -3.780066 | 2.372485  | 0.618022  |
| O | -0.830362 | 2.121958  | 1.814441  |

Sum of electronic and zero-point Energies= -1075.851019

Sum of electronic and thermal Energies= -1075.829761

Sum of electronic and thermal Enthalpies= -1075.828817

Sum of electronic and thermal Free Energies= -1075.900375

#### galeon-6-TS (benzene)

|   |           |           |           |
|---|-----------|-----------|-----------|
| C | -0.219298 | 3.188611  | 0.070913  |
| H | -0.210915 | 4.269043  | -0.063335 |
| C | -1.399665 | 2.435104  | -0.035806 |
| C | -1.246851 | 1.076845  | 0.151177  |
| H | -2.100695 | 0.447050  | 0.146407  |
| C | -0.041665 | 0.474823  | 0.361339  |
| H | -0.065410 | -0.590530 | 0.419693  |
| C | 1.135914  | 1.187716  | 0.507542  |
| O | 2.334527  | 0.495475  | 0.819052  |
| C | 1.040448  | 2.593430  | 0.361004  |
| O | 2.078993  | 3.472801  | 0.511463  |
| C | 3.356974  | 3.120968  | -0.014136 |
| H | 3.876331  | 2.398903  | 0.627627  |
| H | 3.934442  | 4.050978  | -0.044703 |
| H | 3.271745  | 2.725165  | -1.037154 |
| C | 1.569422  | -3.290169 | -0.685216 |
| H | 1.253968  | -4.190144 | -1.211813 |
| C | 0.859530  | -2.867049 | 0.453997  |
| C | -0.537413 | -3.406177 | 0.766599  |
| H | -0.832304 | -3.148175 | 1.790715  |
| H | -0.541271 | -4.501441 | 0.699157  |
| C | -1.642037 | -2.862582 | -0.218942 |
| H | -2.315922 | -3.693191 | -0.484653 |
| H | -1.191952 | -2.547477 | -1.168541 |
| C | 1.344491  | -1.731022 | 1.120927  |
| H | 0.847384  | -1.383592 | 2.023147  |
| C | 2.264926  | -0.877337 | 0.496850  |
| C | 2.947052  | -1.298085 | -0.650880 |
| O | 3.847841  | -0.493957 | -1.274766 |
| H | 3.888026  | 0.337161  | -0.775051 |
| C | 2.643145  | -2.555869 | -1.191588 |
| H | 3.185861  | -2.887942 | -2.073457 |
| C | -2.587868 | -1.747137 | 0.292003  |
| C | -3.395567 | -0.961631 | -0.783302 |
| H | -4.158385 | -1.676153 | -1.132502 |
| H | -2.745897 | -0.798985 | -1.653167 |
| C | -4.106526 | 0.378567  | -0.352123 |
| H | -5.176358 | 0.247007  | -0.553736 |
| C | -3.669806 | 1.717488  | -1.080747 |
| H | -3.142417 | 1.456708  | -2.009753 |
| C | -2.835447 | 2.836714  | -0.352566 |
| H | -2.858581 | 3.727979  | -0.995311 |
| H | -3.355723 | 3.125898  | 0.574735  |
| H | -4.596110 | 2.213293  | -1.399662 |
| H | -4.032811 | 0.481377  | 0.738277  |
| O | -2.737807 | -1.542089 | 1.479353  |

Sum of electronic and zero-point Energies= -1075.780955

Sum of electronic and thermal Energies= -1075.760266

Sum of electronic and thermal Enthalpies= -1075.759322

Sum of electronic and thermal Free Energies= -1075.829166

#### galeon-6-E1 (benzene)

|   |          |          |           |
|---|----------|----------|-----------|
| C | 1.666498 | 2.017811 | 0.634774  |
| H | 2.075525 | 2.246064 | 1.617349  |
| C | 2.506682 | 1.649195 | -0.424601 |
| C | 1.929083 | 1.423147 | -1.682332 |
| H | 2.560539 | 1.173470 | -2.532316 |
| C | 0.542610 | 1.450667 | -1.841646 |
| H | 0.082282 | 1.204864 | -2.795921 |

|   |           |           |           |
|---|-----------|-----------|-----------|
| C | -0.285003 | 1.706275  | -0.750607 |
| O | -1.659648 | 1.524212  | -0.882920 |
| C | 0.273416  | 2.051302  | 0.495690  |
| O | -0.451694 | 2.329486  | 1.616084  |
| C | -1.587828 | 3.193757  | 1.509983  |
| H | -1.409057 | 3.997481  | 0.783383  |
| H | -1.722167 | 3.632277  | 2.504539  |
| H | -2.495511 | 2.645491  | 1.236584  |
| C | -3.266854 | -2.144942 | 0.264471  |
| H | -3.722362 | -3.080818 | 0.583771  |
| C | -1.892493 | -2.098477 | 0.000047  |
| C | -1.015171 | -3.331344 | 0.143343  |
| H | -0.726411 | -3.713028 | -0.846428 |
| H | -1.602091 | -4.123752 | 0.623702  |
| C | 0.283548  | -3.109407 | 0.951589  |
| H | 0.637208  | -4.081549 | 1.331719  |
| H | 0.100347  | -2.483493 | 1.833817  |
| C | -1.341605 | -0.871629 | -0.403943 |
| H | -0.286776 | -0.799397 | -0.641969 |
| C | -2.134546 | 0.265135  | -0.514545 |
| C | -3.514666 | 0.206581  | -0.261929 |
| O | -4.292759 | 1.322692  | -0.374263 |
| H | -3.729526 | 2.037002  | -0.711773 |
| C | -4.073822 | -1.009653 | 0.125492  |
| H | -5.141041 | -1.049771 | 0.330631  |
| C | 1.456599  | -2.553138 | 0.135191  |
| C | 2.373100  | -1.571553 | 0.852175  |
| H | 2.617324  | -1.982170 | 1.844652  |
| H | 1.750629  | -0.688764 | 1.065169  |
| C | 3.644791  | -1.169736 | 0.089046  |
| H | 4.363777  | -1.997660 | 0.148190  |
| C | 4.300870  | 0.130384  | 0.619547  |
| H | 4.009572  | 0.290064  | 1.667893  |
| C | 3.985891  | 1.412988  | -0.197711 |
| H | 4.435736  | 2.271424  | 0.321893  |
| H | 4.486934  | 1.340080  | -1.172450 |
| H | 5.393532  | 0.016596  | 0.628547  |
| H | 3.400666  | -1.067640 | -0.975261 |
| O | 1.630885  | -2.885258 | -1.022644 |

Sum of electronic and zero-point Energies= -1075.851696  
Sum of electronic and thermal Energies= -1075.830143  
Sum of electronic and thermal Enthalpies= -1075.829199  
Sum of electronic and thermal Free Energies= -1075.901730

#### galeon-6-E2 (benzene)

|   |           |           |           |
|---|-----------|-----------|-----------|
| C | 1.922485  | 1.820491  | -0.665584 |
| H | 2.503963  | 1.878986  | -1.583107 |
| C | 2.542193  | 1.537571  | 0.553261  |
| C | 1.750943  | 1.520998  | 1.716307  |
| H | 2.210941  | 1.350508  | 2.687997  |
| C | 0.368778  | 1.655699  | 1.622425  |
| H | -0.264152 | 1.572771  | 2.503529  |
| C | -0.247571 | 1.833549  | 0.380177  |
| O | -1.639314 | 1.759412  | 0.304088  |
| C | 0.531306  | 1.985657  | -0.778385 |
| O | 0.055269  | 2.190672  | -2.034683 |
| C | -1.148626 | 2.937893  | -2.233476 |
| H | -2.040812 | 2.314160  | -2.114289 |
| H | -1.097290 | 3.302106  | -3.264955 |
| H | -1.204201 | 3.794484  | -1.549425 |
| C | -3.353592 | -2.036998 | 0.236601  |
| H | -3.829229 | -3.016146 | 0.254574  |
| C | -2.035485 | -1.916757 | -0.221281 |
| C | -1.237254 | -3.126992 | -0.674994 |
| H | -1.011016 | -3.062190 | -1.748443 |
| H | -1.852218 | -4.024687 | -0.537147 |
| C | 0.103881  | -3.318698 | 0.072746  |
| H | 0.413284  | -4.372921 | -0.013551 |
| H | -0.009148 | -3.117168 | 1.145220  |
| C | -1.455582 | -0.637772 | -0.227467 |

|   |           |           |           |
|---|-----------|-----------|-----------|
| H | -0.445565 | -0.500024 | -0.597823 |
| C | -2.160090 | 0.466156  | 0.240448  |
| C | -3.484089 | 0.339075  | 0.693596  |
| O | -4.172615 | 1.421262  | 1.151363  |
| H | -3.570146 | 2.181755  | 1.119918  |
| C | -4.076452 | -0.923137 | 0.678872  |
| H | -5.098196 | -1.022132 | 1.037840  |
| C | 1.274413  | -2.513981 | -0.506077 |
| C | 2.249928  | -1.913125 | 0.496411  |
| H | 2.487581  | -2.674631 | 1.255778  |
| H | 1.675650  | -1.147689 | 1.041744  |
| C | 3.529308  | -1.310022 | -0.104134 |
| H | 4.200089  | -2.131379 | -0.389609 |
| C | 4.269852  | -0.341971 | 0.852942  |
| H | 4.012845  | -0.583026 | 1.894791  |
| C | 4.010445  | 1.168316  | 0.599450  |
| H | 4.523481  | 1.742123  | 1.384947  |
| H | 4.480418  | 1.450016  | -0.352248 |
| H | 5.354130  | -0.498711 | 0.770428  |
| H | 3.273204  | -0.799939 | -1.040475 |
| O | 1.401366  | -2.370345 | -1.707857 |

Sum of electronic and zero-point Energies= -1075.851445  
Sum of electronic and thermal Energies= -1075.829858  
Sum of electronic and thermal Enthalpies= -1075.828913  
Sum of electronic and thermal Free Energies= -1075.901913

#### daec[n=1]-1-TS (dmf)

|   |           |           |           |
|---|-----------|-----------|-----------|
| C | -3.011441 | -0.021379 | 0.075931  |
| H | -4.090635 | 0.004342  | 0.202947  |
| C | -2.260537 | 1.175198  | 0.160984  |
| C | -0.904335 | 1.036521  | -0.018104 |
| H | -0.270432 | 1.886473  | -0.005865 |
| C | -0.286460 | -0.171662 | -0.188006 |
| H | 0.777846  | -0.136889 | -0.220480 |
| C | -0.978856 | -1.356893 | -0.302054 |
| O | -0.289008 | -2.560281 | -0.529975 |
| C | -2.392553 | -1.276855 | -0.176688 |
| O | -3.070038 | -2.453580 | -0.297389 |
| C | -4.488633 | -2.433120 | -0.174211 |
| H | -4.952060 | -1.800832 | -0.944728 |
| H | -4.803838 | -2.084772 | 0.819528  |
| H | -4.813770 | -3.468461 | -0.312919 |
| C | 3.458537  | -1.498124 | 0.882649  |
| H | 4.334297  | -1.070203 | 1.368104  |
| C | 3.015464  | -0.964205 | -0.339393 |
| C | 3.589785  | 0.346328  | -0.886137 |
| H | 3.998169  | 0.170127  | -1.892630 |
| H | 4.441121  | 0.640435  | -0.257221 |
| C | 2.609963  | 1.568358  | -1.036693 |
| H | 1.762397  | 1.256515  | -1.663184 |
| H | 3.153663  | 2.310840  | -1.639859 |
| C | 1.902766  | -1.576443 | -0.948223 |
| H | 1.532491  | -1.194969 | -1.897500 |
| C | 1.078011  | -2.435460 | -0.202038 |
| C | 1.527040  | -2.966780 | 1.006366  |
| H | 0.891323  | -3.644360 | 1.571679  |
| C | 2.761913  | -2.538235 | 1.509064  |
| H | 3.130374  | -2.947901 | 2.447646  |
| C | 2.054193  | 2.301510  | 0.221402  |
| H | 2.894637  | 2.715517  | 0.796901  |
| H | 1.568652  | 1.583567  | 0.893833  |
| C | 1.057631  | 3.467727  | -0.153046 |
| H | 0.680740  | 3.282356  | -1.169059 |
| C | -0.189942 | 3.769771  | 0.787177  |
| H | 1.645105  | 4.391382  | -0.237982 |
| H | -0.158401 | 3.123656  | 1.675194  |
| C | -1.629634 | 3.707799  | 0.116859  |
| H | -1.500319 | 3.686047  | -0.975213 |
| C | -2.684366 | 2.602463  | 0.495784  |
| H | -2.901559 | 2.670195  | 1.574351  |

H -3.625477 2.867420 -0.008229  
H -2.129178 4.661595 0.332086  
H -0.064059 4.789693 1.171767  
Sum of electronic and zero-point Energies= -926.530658  
Sum of electronic and thermal Energies= -926.512162  
Sum of electronic and thermal Enthalpies= -926.511218  
Sum of electronic and thermal Free Energies= -926.575602

daec[n=1]-1-E1 (dmf)

C -2.143013 -1.415809 -0.355709  
H -2.782817 -1.483800 -1.231280  
C -2.623269 -0.755062 0.789741  
C -1.810235 -0.700137 1.927908  
H -2.179036 -0.228785 2.836503  
C -0.504348 -1.198470 1.888336  
H 0.154799 -1.108706 2.749324  
C -0.003775 -1.760436 0.720435  
O 1.335090 -2.123061 0.644652  
C -0.835547 -1.918967 -0.408684  
O -0.273352 -2.517930 -1.489671  
C -1.065765 -2.651958 -2.668233  
H -1.366828 -1.672112 -3.063990  
H -1.960421 -3.262403 -2.484115  
H -0.427115 -3.156837 -3.398602  
C 4.104510 0.952424 0.104625  
H 4.844354 1.742284 -0.017676  
C 2.749717 1.220057 -0.157075  
C 2.318198 2.614033 -0.602873  
H 3.027618 2.954247 -1.370969  
H 2.451812 3.310844 0.240470  
C 0.883736 2.749442 -1.151635  
H 0.693457 1.918478 -1.846874  
H 0.834828 3.660796 -1.763467  
C 1.825741 0.180484 0.004574  
H 0.777837 0.353501 -0.201365  
C 2.230887 -1.087461 0.441755  
C 3.580107 -1.351599 0.690451  
H 3.884452 -2.341141 1.023107  
C 4.509106 -0.321443 0.513783  
H 5.562661 -0.517614 0.705991  
C -0.240956 2.803617 -0.088765  
H -0.376074 3.843040 0.247468  
H 0.053410 2.236723 0.805906  
C -1.567621 2.232877 -0.614317  
H -1.391716 1.189060 -0.908096  
C -2.749335 2.283995 0.375160  
H -1.855265 2.757126 -1.539904  
H -2.393087 2.041031 1.387028  
C -3.909154 1.329010 -0.009305  
H -3.863786 1.123381 -1.088781  
C -3.948154 -0.020662 0.762698  
H -4.259710 0.178195 1.797103  
H -4.728248 -0.650996 0.312250  
H -4.876427 1.821651 0.162056  
H -3.123599 3.316353 0.430848  
Sum of electronic and zero-point Energies= -926.604635  
Sum of electronic and thermal Energies= -926.585007  
Sum of electronic and thermal Enthalpies= -926.584063  
Sum of electronic and thermal Free Energies= -926.652406

daec[n=1]-1-E2 (dmf)

C -1.845873 -1.465139 0.624274  
H -2.256376 -1.477329 1.629550  
C -2.659705 -1.030027 -0.436165  
C -2.146861 -1.067214 -1.739209  
H -2.770241 -0.768543 -2.580088  
C -0.808590 -1.414452 -1.961017  
H -0.379518 -1.380565 -2.960301  
C 0.016028 -1.749240 -0.892592  
O 1.372779 -1.964469 -1.094178

C -0.512647 -1.835537 0.412997  
O 0.348247 -2.234582 1.383906  
C -0.126513 -2.274764 2.728570  
H -0.962480 -2.979067 2.838621  
H -0.437895 -1.279534 3.074545  
H 0.718992 -2.619708 3.330480  
C 3.959753 1.039010 0.214423  
H 4.651110 1.804973 0.563188  
C 2.606784 1.362019 0.010560  
C 2.109088 2.778890 0.280973  
H 2.818144 3.478069 -0.185682  
H 2.180536 2.976738 1.362755  
C 0.684610 3.113794 -0.204270  
H 0.564524 2.737050 -1.230708  
H 0.596250 4.206320 -0.280922  
C 1.747804 0.354655 -0.444217  
H 0.704186 0.574912 -0.626800  
C 2.211184 -0.948973 -0.662249  
C 3.558143 -1.262673 -0.470709  
H 3.908245 -2.276369 -0.650432  
C 4.425035 -0.255288 -0.034467  
H 5.477068 -0.489680 0.119626  
C -0.468213 2.582214 0.682206  
H -0.679012 3.309373 1.481291  
H -0.159134 1.659037 1.192981  
C -1.743216 2.289797 -0.124864  
H -1.499786 1.527646 -0.877765  
C -2.952679 1.813104 0.704862  
H -2.034406 3.186885 -0.694633  
H -2.610960 1.127507 1.494158  
C -4.047272 1.119359 -0.146388  
H -3.972631 1.471050 -1.185824  
C -4.020461 -0.435720 -0.135256  
H -4.350428 -0.782896 0.853327  
H -4.762336 -0.796022 -0.862017  
H -5.044140 1.422716 0.203047  
H -3.386308 2.676973 1.229006  
Sum of electronic and zero-point Energies= -926.605173  
Sum of electronic and thermal Energies= -926.585622  
Sum of electronic and thermal Enthalpies= -926.584677  
Sum of electronic and thermal Free Energies= -926.652329

daec[n=1]-2-TS (dmf)

C -2.894349 0.752418 0.024488  
H -3.918273 1.073231 0.198288  
C -1.845065 1.701193 0.046304  
C -0.585765 1.195819 -0.181452  
H 0.269331 1.828101 -0.186665  
C -0.337808 -0.133549 -0.362191  
H 0.690766 -0.383215 -0.455263  
C -1.321238 -1.096174 -0.380489  
O -0.971965 -2.450958 -0.551553  
C -2.651581 -0.634115 -0.193786  
O -3.626309 -1.586436 -0.216914  
C -4.976712 -1.179293 -0.019602  
H -5.305384 -0.477394 -0.799015  
H -5.120400 -0.719003 0.968189  
H -5.574393 -2.093531 -0.081706  
C 2.892933 -2.221054 0.904271  
H 3.831323 -1.964993 1.393829  
C 2.608234 -1.692464 -0.366199  
C 3.444496 -0.554531 -0.959777  
H 4.393355 -0.496480 -0.409060  
H 3.701915 -0.796232 -2.001310  
C 2.807958 0.893873 -1.004193  
H 1.898561 0.865179 -1.618389  
H 3.524263 1.499754 -1.579399  
C 1.401662 -2.089887 -0.977010  
H 1.151077 -1.708775 -1.965199  
C 0.380326 -2.662598 -0.198715

|   |           |           |           |
|---|-----------|-----------|-----------|
| C | 0.670591  | -3.191544 | 1.058547  |
| H | -0.117711 | -3.651583 | 1.649979  |
| C | 1.963422  | -3.027671 | 1.572323  |
| H | 2.209079  | -3.441880 | 2.548379  |
| C | 2.544726  | 1.632252  | 0.339031  |
| H | 3.488882  | 1.607083  | 0.905011  |
| H | 1.831180  | 1.073898  | 0.957390  |
| C | 2.165099  | 3.165044  | 0.285058  |
| H | 2.918049  | 3.642119  | -0.360818 |
| C | 0.783716  | 3.802720  | -0.147470 |
| H | 2.368824  | 3.549819  | 1.295822  |
| H | 1.020450  | 4.869363  | -0.266608 |
| C | -0.449411 | 3.719143  | 0.842362  |
| H | -0.173144 | 3.112963  | 1.716784  |
| C | -1.843057 | 3.201793  | 0.327501  |
| H | -2.597726 | 3.455626  | 1.085483  |
| H | -2.129604 | 3.762804  | -0.576797 |
| H | -0.624125 | 4.731320  | 1.230514  |
| H | 0.500837  | 3.472724  | -1.155711 |

Sum of electronic and zero-point Energies= -926.524957  
Sum of electronic and thermal Energies= -926.506560  
Sum of electronic and thermal Enthalpies= -926.505615  
Sum of electronic and thermal Free Energies= -926.569614

daec[n=1]-2-E1 (dmf)

|   |           |           |           |
|---|-----------|-----------|-----------|
| C | -1.778118 | -1.712222 | -0.527502 |
| H | -2.308594 | -1.716017 | -1.475202 |
| C | -2.448836 | -1.271280 | 0.625022  |
| C | -1.779813 | -1.306853 | 1.856057  |
| H | -2.296411 | -1.006022 | 2.765632  |
| C | -0.421901 | -1.630280 | 1.906764  |
| H | 0.133610  | -1.575208 | 2.840686  |
| C | 0.266199  | -1.941976 | 0.739499  |
| O | 1.651298  | -2.038906 | 0.762815  |
| C | -0.418917 | -2.054829 | -0.486725 |
| O | 0.325612  | -2.417885 | -1.562120 |
| C | -0.316171 | -2.470459 | -2.835417 |
| H | -0.696525 | -1.483987 | -3.134644 |
| H | -1.139921 | -3.197268 | -2.840552 |
| H | 0.454502  | -2.791421 | -3.541981 |
| C | 3.795070  | 1.468609  | 0.036330  |
| H | 4.378507  | 2.368248  | -0.154582 |
| C | 2.393308  | 1.515197  | -0.054811 |
| C | 1.706371  | 2.826358  | -0.422288 |
| H | 1.794879  | 3.520517  | 0.429188  |
| H | 2.302268  | 3.286473  | -1.223202 |
| C | 0.227646  | 2.782713  | -0.775914 |
| H | 0.047178  | 1.878819  | -1.475598 |
| H | 0.071850  | 3.628489  | -1.561386 |
| C | 1.671193  | 0.341599  | 0.189697  |
| H | 0.591029  | 0.359711  | 0.125479  |
| C | 2.326838  | -0.856598 | 0.510938  |
| C | 3.721086  | -0.897650 | 0.597199  |
| H | 4.217884  | -1.832480 | 0.845864  |
| C | 4.444797  | 0.274116  | 0.359220  |
| H | 5.531467  | 0.249792  | 0.422526  |
| C | -0.824876 | 2.907102  | 0.244627  |
| H | -0.607968 | 3.826989  | 0.808592  |
| H | -0.727413 | 2.081648  | 0.965792  |
| C | -2.276074 | 2.972296  | -0.286380 |
| H | -2.285147 | 3.603085  | -1.188045 |
| C | -2.909814 | 1.598655  | -0.606292 |
| H | -2.909773 | 3.492848  | 0.447477  |
| H | -3.639468 | 1.703209  | -1.422643 |
| C | -3.616265 | 0.955450  | 0.604665  |
| H | -3.053324 | 1.179979  | 1.522266  |
| C | -3.794240 | -0.585139 | 0.520849  |
| H | -4.450713 | -0.906058 | 1.341615  |
| H | -4.294524 | -0.854970 | -0.419383 |
| H | -4.604210 | 1.422363  | 0.731591  |

|   |           |          |           |
|---|-----------|----------|-----------|
| H | -2.129365 | 0.926717 | -0.988264 |
|---|-----------|----------|-----------|

Sum of electronic and zero-point Energies= -926.603984  
Sum of electronic and thermal Energies= -926.584405  
Sum of electronic and thermal Enthalpies= -926.583461  
Sum of electronic and thermal Free Energies= -926.651792

daec[n=1]-2-E2 (dmf)

|   |           |           |           |
|---|-----------|-----------|-----------|
| C | 1.688805  | 1.777386  | 0.511825  |
| H | 2.154324  | 1.847940  | 1.490934  |
| C | 2.449813  | 1.299159  | -0.571603 |
| C | 1.866914  | 1.254506  | -1.841801 |
| H | 2.450358  | 0.920710  | -2.697541 |
| C | 0.503682  | 1.539213  | -2.000755 |
| H | 0.014895  | 1.415917  | -2.964959 |
| C | -0.268915 | 1.880679  | -0.899672 |
| O | -1.652199 | 1.935839  | -1.002808 |
| C | 0.330996  | 2.072882  | 0.364582  |
| O | -0.494797 | 2.472944  | 1.364884  |
| C | 0.054464  | 2.601583  | 2.675207  |
| H | 0.859918  | 3.348295  | 2.701936  |
| H | 0.434105  | 1.640069  | 3.047406  |
| H | -0.770480 | 2.936126  | 3.310593  |
| C | -3.723665 | -1.471072 | 0.235062  |
| H | -4.286516 | -2.347098 | 0.554731  |
| C | -2.341363 | -1.578981 | 0.000397  |
| C | -1.656681 | -2.932106 | 0.166073  |
| H | -1.800019 | -3.272256 | 1.203988  |
| H | -2.219849 | -3.652406 | -0.445957 |
| C | -0.161459 | -3.060600 | -0.198397 |
| H | 0.042733  | -2.532091 | -1.140939 |
| H | 0.026425  | -4.123333 | -0.410887 |
| C | -1.646737 | -0.437072 | -0.411748 |
| H | -0.583401 | -0.500189 | -0.603909 |
| C | -2.308729 | 0.788267  | -0.585270 |
| C | -3.683487 | 0.887407  | -0.362056 |
| H | -4.185080 | 1.841848  | -0.503002 |
| C | -4.381324 | -0.252624 | 0.049261  |
| H | -5.452973 | -0.183927 | 0.229049  |
| C | 0.840799  | -2.629010 | 0.890772  |
| H | 0.604818  | -3.190505 | 1.807443  |
| H | 0.707100  | -1.566540 | 1.143791  |
| C | 2.313838  | -2.895432 | 0.499607  |
| H | 2.361725  | -3.861566 | -0.024910 |
| C | 2.960224  | -1.795517 | -0.374659 |
| H | 2.916597  | -3.022110 | 1.411540  |
| H | 3.716910  | -2.239486 | -1.037967 |
| C | 3.625818  | -0.675296 | 0.451059  |
| H | 3.033371  | -0.485680 | 1.357727  |
| C | 3.801087  | 0.674882  | -0.294488 |
| H | 4.414361  | 1.341178  | 0.328721  |
| H | 4.347086  | 0.517905  | -1.234820 |
| H | 4.610084  | -1.022415 | 0.798564  |
| H | 2.195004  | -1.370175 | -1.038504 |

Sum of electronic and zero-point Energies= -926.604352  
Sum of electronic and thermal Energies= -926.584780  
Sum of electronic and thermal Enthalpies= -926.583836  
Sum of electronic and thermal Free Energies= -926.652141

daec[n=1]-3-TS (dmf)

|   |           |           |           |
|---|-----------|-----------|-----------|
| C | 3.035521  | 0.392877  | 0.078753  |
| H | 4.096801  | 0.572882  | 0.229661  |
| C | 2.126904  | 1.479001  | 0.057876  |
| C | 0.811813  | 1.136787  | -0.141931 |
| H | 0.066125  | 1.884799  | -0.224397 |
| C | 0.368625  | -0.152603 | -0.220382 |
| H | -0.689716 | -0.257304 | -0.260754 |
| C | 1.215690  | -1.237597 | -0.248038 |
| O | 0.701572  | -2.536286 | -0.420102 |
| C | 2.601389  | -0.951155 | -0.102343 |
| O | 3.438423  | -2.027003 | -0.130853 |

|   |           |           |           |
|---|-----------|-----------|-----------|
| C | 4.836488  | -1.802318 | 0.020017  |
| H | 5.231010  | -1.158160 | -0.778549 |
| H | 5.304704  | -2.788844 | -0.047178 |
| H | 5.071783  | -1.355633 | 0.996508  |
| C | -3.260395 | -1.865661 | 0.608960  |
| H | -4.214237 | -1.524782 | 1.008311  |
| C | -2.743542 | -1.289641 | -0.565595 |
| C | -3.298281 | 0.005925  | -1.173662 |
| H | -4.293920 | -0.178606 | -1.605062 |
| H | -2.654119 | 0.293960  | -2.015044 |
| C | -3.496844 | 1.231959  | -0.203562 |
| H | -4.205405 | 0.902752  | 0.569184  |
| H | -4.042522 | 1.987267  | -0.789288 |
| C | -1.533926 | -1.813410 | -1.058735 |
| H | -1.114164 | -1.400666 | -1.972913 |
| C | -0.696645 | -2.572595 | -0.222595 |
| C | -1.207241 | -3.132697 | 0.946227  |
| H | -0.567692 | -3.729941 | 1.592121  |
| C | -2.528617 | -2.830780 | 1.310748  |
| H | -2.946769 | -3.273275 | 2.212981  |
| C | -2.322289 | 1.948317  | 0.550313  |
| H | -1.608588 | 1.202631  | 0.916751  |
| H | -2.767773 | 2.375889  | 1.461014  |
| C | -1.562431 | 3.118021  | -0.156556 |
| H | -2.281527 | 3.932873  | -0.320683 |
| C | -0.322034 | 3.705317  | 0.653738  |
| H | -1.247025 | 2.814847  | -1.165311 |
| H | -0.179618 | 3.113377  | 1.568473  |
| C | 1.072677  | 3.860044  | -0.092393 |
| H | 0.907659  | 3.751129  | -1.174464 |
| C | 2.317548  | 2.975207  | 0.300272  |
| H | 2.552576  | 3.142751  | 1.363911  |
| H | 3.182978  | 3.366273  | -0.255091 |
| H | 1.404340  | 4.897092  | 0.048712  |
| H | -0.611325 | 4.705001  | 1.002082  |

Sum of electronic and zero-point Energies= -926.521100  
Sum of electronic and thermal Energies= -926.502615  
Sum of electronic and thermal Enthalpies= -926.501670  
Sum of electronic and thermal Free Energies= -926.565870

#### daec[n=1]-3-E1 (dmf)

|   |           |           |           |
|---|-----------|-----------|-----------|
| C | 2.202521  | -1.375132 | -0.388603 |
| H | 2.781854  | -1.436484 | -1.305865 |
| C | 2.684789  | -0.584093 | 0.670153  |
| C | 1.959105  | -0.540633 | 1.866652  |
| H | 2.341020  | 0.023698  | 2.714646  |
| C | 0.703682  | -1.150988 | 1.950235  |
| H | 0.090146  | -1.048604 | 2.842961  |
| C | 0.180935  | -1.829621 | 0.856838  |
| O | -1.151484 | -2.230815 | 0.874414  |
| C | 0.956201  | -2.011244 | -0.308269 |
| O | 0.385404  | -2.738567 | -1.302294 |
| C | 1.110601  | -2.892368 | -2.521278 |
| H | 1.287338  | -1.923795 | -3.009032 |
| H | 0.479804  | -3.512489 | -3.164481 |
| H | 2.071096  | -3.399223 | -2.355667 |
| C | -3.892897 | 0.766487  | -0.127458 |
| H | -4.620784 | 1.539850  | -0.367902 |
| C | -2.557783 | 0.909768  | -0.535094 |
| C | -2.066930 | 2.115329  | -1.315905 |
| H | -2.911812 | 2.552258  | -1.865625 |
| H | -1.345381 | 1.777870  | -2.072842 |
| C | -1.423170 | 3.249808  | -0.476782 |
| H | -2.174677 | 3.624732  | 0.234252  |
| H | -1.215944 | 4.081654  | -1.167398 |
| C | -1.650944 | -0.107725 | -0.214107 |
| H | -0.623435 | -0.009236 | -0.540997 |
| C | -2.045979 | -1.234386 | 0.513970  |
| C | -3.381224 | -1.383009 | 0.903710  |
| H | -3.686162 | -2.265141 | 1.461873  |

|   |           |           |           |
|---|-----------|-----------|-----------|
| C | -4.294347 | -0.376450 | 0.575363  |
| H | -5.334276 | -0.485234 | 0.878829  |
| C | -0.134984 | 2.930759  | 0.308584  |
| H | -0.346260 | 2.173839  | 1.078422  |
| H | 0.141740  | 3.844649  | 0.857663  |
| C | 1.079346  | 2.467155  | -0.516698 |
| H | 1.203691  | 3.114817  | -1.399333 |
| C | 2.392788  | 2.466492  | 0.298185  |
| H | 0.899126  | 1.458214  | -0.909888 |
| H | 2.178310  | 2.109632  | 1.315168  |
| C | 3.537164  | 1.614392  | -0.315216 |
| H | 3.281403  | 1.344018  | -1.349913 |
| C | 3.885424  | 0.315000  | 0.466583  |
| H | 4.301244  | 0.591937  | 1.444989  |
| H | 4.677543  | -0.215438 | -0.080468 |
| H | 4.458514  | 2.209801  | -0.378793 |
| H | 2.728744  | 3.506479  | 0.417258  |

Sum of electronic and zero-point Energies= -926.604152  
Sum of electronic and thermal Energies= -926.584558  
Sum of electronic and thermal Enthalpies= -926.583614  
Sum of electronic and thermal Free Energies= -926.651731

#### daec[n=1]-3-E2 (dmf)

|   |           |           |           |
|---|-----------|-----------|-----------|
| C | 1.966002  | -1.338975 | 0.611712  |
| H | 2.404623  | -1.222266 | 1.598102  |
| C | 2.683489  | -0.887575 | -0.509923 |
| C | 2.146977  | -1.101807 | -1.786210 |
| H | 2.704855  | -0.798615 | -2.670382 |
| C | 0.855885  | -1.624347 | -1.928889 |
| H | 0.394634  | -1.716665 | -2.910039 |
| C | 0.102475  | -1.943082 | -0.804829 |
| O | -1.252830 | -2.234928 | -0.918995 |
| C | 0.676090  | -1.866651 | 0.481819  |
| O | -0.110813 | -2.262158 | 1.515108  |
| C | 0.411472  | -2.150009 | 2.837905  |
| H | 1.318384  | -2.756966 | 2.964940  |
| H | -0.373078 | -2.529316 | 3.498879  |
| H | 0.630995  | -1.105121 | 3.096685  |
| C | -3.760210 | 0.983004  | 0.013655  |
| H | -4.424240 | 1.806920  | 0.270766  |
| C | -2.463458 | 1.247626  | -0.453575 |
| C | -1.925190 | 2.656779  | -0.619751 |
| H | -2.761494 | 3.338118  | -0.828566 |
| H | -1.272842 | 2.685104  | -1.503389 |
| C | -1.152454 | 3.230684  | 0.596225  |
| H | -1.838971 | 3.272169  | 1.455252  |
| H | -0.903458 | 4.275474  | 0.354782  |
| C | -1.641376 | 0.163340  | -0.783134 |
| H | -0.648830 | 0.359097  | -1.170465 |
| C | -2.076405 | -1.156048 | -0.624126 |
| C | -3.374743 | -1.417439 | -0.176906 |
| H | -3.711685 | -2.445378 | -0.065659 |
| C | -4.207864 | -0.338434 | 0.135521  |
| H | -5.219531 | -0.534409 | 0.487029  |
| C | 0.134056  | 2.509184  | 1.045480  |
| H | -0.112606 | 1.496639  | 1.398001  |
| H | 0.511680  | 3.047928  | 1.928917  |
| C | 1.269929  | 2.407721  | 0.010530  |
| H | 1.398628  | 3.374247  | -0.502519 |
| C | 2.617946  | 1.991108  | 0.641385  |
| H | 0.998452  | 1.687438  | -0.771846 |
| H | 2.431519  | 1.224531  | 1.406467  |
| C | 3.675052  | 1.465909  | -0.367176 |
| H | 3.375066  | 1.736783  | -1.389890 |
| C | 3.940185  | -0.066336 | -0.315343 |
| H | 4.394240  | -0.312686 | 0.654284  |
| H | 4.680843  | -0.313417 | -1.088734 |
| H | 4.638894  | 1.964536  | -0.193845 |
| H | 3.025907  | 2.854631  | 1.186097  |

Sum of electronic and zero-point Energies= -926.604170



Sum of electronic and thermal Energies= -926.584645  
Sum of electronic and thermal Enthalpies= -926.583701  
Sum of electronic and thermal Free Energies= -926.651289

daec[n=1]-4-TS (dmf)

|   |           |           |           |
|---|-----------|-----------|-----------|
| C | -2.505417 | 1.963852  | -0.002251 |
| H | -3.377572 | 2.606175  | 0.110543  |
| C | -1.189646 | 2.466790  | 0.037160  |
| C | -0.214969 | 1.511234  | -0.117617 |
| H | 0.800414  | 1.807310  | -0.137813 |
| C | -0.463189 | 0.179600  | -0.229675 |
| H | 0.397096  | -0.444452 | -0.259287 |
| C | -1.728587 | -0.356273 | -0.318103 |
| O | -1.839340 | -1.752717 | -0.529413 |
| C | -2.794117 | 0.578159  | -0.202816 |
| O | -4.125690 | 0.282120  | -0.298209 |
| C | -4.576919 | -0.997665 | 0.144409  |
| H | -4.218772 | -1.217222 | 1.160387  |
| H | -4.260690 | -1.800053 | -0.530940 |
| H | -5.670193 | -0.936454 | 0.154856  |
| C | 1.870956  | -3.128100 | 0.777207  |
| H | 2.843266  | -3.334352 | 1.222454  |
| C | 1.797201  | -2.434336 | -0.444648 |
| C | 3.030743  | -1.766302 | -1.066459 |
| H | 2.789553  | -1.488663 | -2.101945 |
| H | 3.850321  | -2.496896 | -1.127432 |
| C | 3.626059  | -0.486131 | -0.352146 |
| H | 4.472740  | -0.161967 | -0.975773 |
| H | 4.053834  | -0.777593 | 0.618192  |
| C | 0.517202  | -2.240308 | -0.998952 |
| H | 0.419806  | -1.719130 | -1.948970 |
| C | -0.642263 | -2.439233 | -0.221177 |
| C | -0.553255 | -3.124591 | 0.986812  |
| H | -1.447216 | -3.286860 | 1.584037  |
| C | 0.710256  | -3.522136 | 1.447814  |
| H | 0.788092  | -4.069366 | 2.385325  |
| C | 2.611940  | 0.667178  | -0.154449 |
| H | 1.934686  | 0.337214  | 0.639138  |
| H | 2.024627  | 0.719241  | -1.078192 |
| C | 3.085297  | 2.113569  | 0.213279  |
| H | 3.552259  | 2.580865  | -0.667026 |
| C | 2.043786  | 3.141493  | 0.848829  |
| H | 3.885323  | 2.028988  | 0.963900  |
| H | 1.537888  | 2.641528  | 1.686665  |
| C | 0.973765  | 3.930384  | -0.033000 |
| H | 1.225005  | 4.996696  | 0.040825  |
| C | -0.575386 | 3.848149  | 0.290228  |
| H | -1.071617 | 4.625990  | -0.308370 |
| H | -0.736649 | 4.138138  | 1.340805  |
| H | 1.110176  | 3.676261  | -1.093885 |
| H | 2.677124  | 3.907376  | 1.316814  |

Sum of electronic and zero-point Energies= -926.516805  
Sum of electronic and thermal Energies= -926.498173  
Sum of electronic and thermal Enthalpies= -926.497229  
Sum of electronic and thermal Free Energies= -926.562330

daec[n=1]-4-E1 (dmf)

|   |           |          |           |
|---|-----------|----------|-----------|
| C | 1.756336  | 1.857083 | -0.601455 |
| H | 2.268460  | 2.022298 | -1.547999 |
| C | 2.436950  | 1.293066 | 0.484949  |
| C | 1.744962  | 1.153680 | 1.699460  |
| H | 2.260391  | 0.777742 | 2.580677  |
| C | 0.377057  | 1.420490 | 1.762140  |
| H | -0.186902 | 1.227707 | 2.672624  |
| C | -0.318052 | 1.852579 | 0.630616  |
| O | -1.714016 | 1.858324 | 0.665205  |
| C | 0.386466  | 2.157112 | -0.548711 |
| O | -0.179130 | 2.615780 | -1.700892 |
| C | -1.274756 | 3.538079 | -1.623741 |
| H | -1.123181 | 4.265886 | -0.816304 |

|   |           |           |           |
|---|-----------|-----------|-----------|
| H | -2.230246 | 3.024096  | -1.477774 |
| H | -1.286032 | 4.062644  | -2.584978 |
| C | -3.374702 | -1.956545 | 0.238671  |
| H | -3.801125 | -2.955937 | 0.167946  |
| C | -2.210797 | -1.642878 | -0.479986 |
| C | -1.491239 | -2.662350 | -1.345524 |
| H | -1.240247 | -2.196944 | -2.310287 |
| H | -2.174101 | -3.493649 | -1.566304 |
| C | -0.187671 | -3.250561 | -0.739695 |
| H | 0.193646  | -3.997191 | -1.452994 |
| H | -0.432460 | -3.801402 | 0.181354  |
| C | -1.694901 | -0.343795 | -0.372307 |
| H | -0.812956 | -0.078054 | -0.943215 |
| C | -2.276919 | 0.597375  | 0.480623  |
| C | -3.447141 | 0.289489  | 1.179944  |
| H | -3.900404 | 1.033342  | 1.830836  |
| C | -3.993279 | -0.990357 | 1.041558  |
| H | -4.902205 | -1.241975 | 1.585319  |
| C | 0.913300  | -2.220600 | -0.437337 |
| H | 0.569737  | -1.559761 | 0.369117  |
| H | 1.056200  | -1.576586 | -1.317705 |
| C | 2.264568  | -2.828956 | -0.019753 |
| H | 2.742266  | -3.313925 | -0.885820 |
| C | 3.225469  | -1.802069 | 0.617460  |
| H | 2.084495  | -3.628323 | 0.715975  |
| H | 2.694601  | -1.334688 | 1.458114  |
| C | 3.768499  | -0.702375 | -0.330658 |
| H | 4.779395  | -0.974304 | -0.665478 |
| C | 3.826621  | 0.721101  | 0.294287  |
| H | 4.412229  | 1.370717  | -0.370492 |
| H | 4.357725  | 0.679443  | 1.255351  |
| C | 3.155532  | -0.644351 | -1.240308 |
| H | 4.075737  | -2.337031 | 1.064584  |

Sum of electronic and zero-point Energies= -926.600294  
Sum of electronic and thermal Energies= -926.580573  
Sum of electronic and thermal Enthalpies= -926.579628  
Sum of electronic and thermal Free Energies= -926.647958

daec[n=1]-4-E2 (dmf)

|   |           |           |           |
|---|-----------|-----------|-----------|
| C | -1.623381 | -1.700875 | 0.644521  |
| H | -2.026430 | -1.736404 | 1.654428  |
| C | -2.441799 | -1.353972 | -0.440490 |
| C | -1.884373 | -1.400923 | -1.728787 |
| H | -2.506507 | -1.181496 | -2.594985 |
| C | -0.519078 | -1.638960 | -1.909934 |
| H | -0.071089 | -1.594816 | -2.900452 |
| C | 0.308523  | -1.831680 | -0.803973 |
| O | 1.694134  | -1.814230 | -0.950492 |
| C | -0.254044 | -1.935064 | 0.481417  |
| O | 0.512343  | -2.131560 | 1.599802  |
| C | 1.229409  | -3.373185 | 1.652665  |
| H | 1.939026  | -3.468810 | 0.823246  |
| H | 0.532011  | -4.222981 | 1.639300  |
| H | 1.774815  | -3.367895 | 2.601576  |
| C | 3.396638  | 1.813842  | 0.252050  |
| H | 3.840035  | 2.746175  | 0.598223  |
| C | 2.149481  | 1.831342  | -0.391111 |
| C | 1.370821  | 3.115885  | -0.617539 |
| H | 1.028939  | 3.144106  | -1.663016 |
| H | 2.045918  | 3.972124  | -0.486288 |
| C | 0.134705  | 3.326594  | 0.298489  |
| H | -0.290122 | 4.310482  | 0.047034  |
| H | 0.466231  | 3.393113  | 1.345999  |
| C | 1.614426  | 0.611993  | -0.830268 |
| H | 0.666623  | 0.607317  | -1.355604 |
| C | 2.267453  | -0.597381 | -0.580736 |
| C | 3.520130  | -0.610768 | 0.037905  |
| H | 4.031750  | -1.554539 | 0.210603  |
| C | 4.078626  | 0.605578  | 0.442913  |
| H | 5.051821  | 0.606976  | 0.930771  |

|                                                          |           |           |           |
|----------------------------------------------------------|-----------|-----------|-----------|
| C                                                        | -0.958091 | 2.251100  | 0.180467  |
| H                                                        | -0.564362 | 1.301690  | 0.565690  |
| H                                                        | -1.181824 | 2.078483  | -0.882739 |
| C                                                        | -2.260967 | 2.575429  | 0.934358  |
| H                                                        | -2.803127 | 3.382895  | 0.417199  |
| C                                                        | -3.178673 | 1.348517  | 1.125201  |
| H                                                        | -2.008508 | 2.968166  | 1.931697  |
| H                                                        | -2.587059 | 0.574869  | 1.633072  |
| C                                                        | -3.807101 | 0.761800  | -0.164946 |
| H                                                        | -4.838244 | 1.127923  | -0.268006 |
| C                                                        | -3.832354 | -0.793390 | -0.226125 |
| H                                                        | -4.488832 | -1.099944 | -1.051845 |
| H                                                        | -4.270256 | -1.190306 | 0.700157  |
| H                                                        | -3.269249 | 1.123261  | -1.051845 |
| H                                                        | -3.985463 | 1.610626  | 1.824852  |
| Sum of electronic and zero-point Energies= -926.600152   |           |           |           |
| Sum of electronic and thermal Energies= -926.580456      |           |           |           |
| Sum of electronic and thermal Enthalpies= -926.579511    |           |           |           |
| Sum of electronic and thermal Free Energies= -926.647464 |           |           |           |

daec[n=2]-1-TS (dmf)

|   |           |           |           |
|---|-----------|-----------|-----------|
| C | -3.048924 | -0.542773 | -0.019245 |
| H | -4.127862 | -0.651820 | 0.055097  |
| C | -2.471069 | 0.743426  | 0.073212  |
| C | -1.094480 | 0.804632  | -0.038991 |
| H | -0.578016 | 1.740174  | -0.013773 |
| C | -0.312159 | -0.320405 | -0.171012 |
| H | 0.746344  | -0.162756 | -0.182034 |
| C | -0.849301 | -1.588981 | -0.279010 |
| O | -0.034294 | -2.714997 | -0.445644 |
| C | -2.262118 | -1.703360 | -0.211469 |
| O | -2.764929 | -2.964175 | -0.329296 |
| C | -4.176762 | -3.136167 | -0.254489 |
| H | -4.351922 | -4.209520 | -0.373724 |
| H | -4.572914 | -2.809847 | 0.717535  |
| H | -4.693421 | -2.592909 | -1.058333 |
| C | 3.650474  | -1.404717 | 0.944501  |
| H | 4.520608  | -0.938566 | 1.404174  |
| C | 3.173511  | -0.918312 | -0.284211 |
| C | 3.726315  | 0.363637  | -0.902277 |
| H | 4.198679  | 0.127268  | -1.868031 |
| H | 4.528009  | 0.746580  | -0.255992 |
| C | 2.696491  | 1.504661  | -1.188051 |
| H | 1.898250  | 1.100600  | -1.827296 |
| H | 3.221605  | 2.243185  | -1.812446 |
| C | 2.068193  | -1.569481 | -0.857830 |
| H | 1.675460  | -1.229037 | -1.813074 |
| C | 1.302377  | -2.462899 | -0.096023 |
| C | 1.783330  | -2.949529 | 1.119143  |
| H | 1.188601  | -3.654311 | 1.695455  |
| C | 2.998339  | -2.452030 | 1.605071  |
| H | 3.390879  | -2.823760 | 2.549684  |
| C | 2.042094  | 2.270369  | -0.006369 |
| H | 2.826052  | 2.750116  | 0.599709  |
| H | 1.528468  | 1.574770  | 0.669599  |
| C | 1.065027  | 3.364313  | -0.527943 |
| C | 0.189096  | 4.165985  | 0.487455  |
| C | -1.139427 | 3.596246  | 1.081474  |
| H | -1.491190 | 4.350780  | 1.799975  |
| H | -0.931763 | 2.708266  | 1.690179  |
| H | -0.071917 | 5.110204  | -0.014676 |
| H | 0.826009  | 4.454862  | 1.337741  |
| H | 0.423361  | 2.931719  | -1.309154 |
| H | 1.679690  | 4.109770  | -1.054978 |
| C | -2.300848 | 3.319002  | 0.066885  |
| H | -2.963728 | 4.194651  | 0.057361  |
| H | -1.897177 | 3.248306  | -0.953153 |
| C | -3.193298 | 2.064590  | 0.315978  |
| H | -3.578424 | 2.089429  | 1.348453  |
| H | -4.081052 | 2.135986  | -0.329584 |

Sum of electronic and zero-point Energies= -965.843558  
Sum of electronic and thermal Energies= -965.823961  
Sum of electronic and thermal Enthalpies= -965.823017  
Sum of electronic and thermal Free Energies= -965.889747

daec[n=2]-1-E1 (dmf)

|   |           |           |           |
|---|-----------|-----------|-----------|
| C | -1.574859 | -1.903255 | -0.624235 |
| H | -2.094996 | -1.930448 | -1.577686 |
| C | -2.312008 | -1.647407 | 0.546828  |
| C | -1.647094 | -1.642431 | 1.777786  |
| H | -2.204506 | -1.471167 | 2.696430  |
| C | -0.256521 | -1.796808 | 1.829267  |
| H | 0.278835  | -1.741527 | 2.774801  |
| C | 0.472327  | -1.972645 | 0.660261  |
| O | 1.857534  | -2.032684 | 0.711673  |
| C | -0.185887 | -2.070161 | -0.584764 |
| O | 0.606927  | -2.281098 | -1.666245 |
| C | -0.011126 | -2.322425 | -2.951549 |
| H | 0.800228  | -2.492870 | -3.664850 |
| H | -0.736386 | -3.144594 | -3.022545 |
| H | -0.510466 | -1.372585 | -3.187391 |
| C | 4.041017  | 1.482398  | 0.202363  |
| H | 4.635264  | 2.386104  | 0.075327  |
| C | 2.646293  | 1.540204  | 0.043179  |
| C | 1.984284  | 2.873046  | -0.287830 |
| H | 2.672568  | 3.423473  | -0.944017 |
| H | 1.925616  | 3.475691  | 0.633350  |
| C | 0.588191  | 2.838906  | -0.949681 |
| H | 0.542128  | 2.005373  | -1.666573 |
| H | 0.479729  | 3.754536  | -1.549332 |
| C | 1.907899  | 0.359854  | 0.203208  |
| H | 0.832408  | 0.375150  | 0.078989  |
| C | 2.543019  | -0.847392 | 0.522372  |
| C | 3.931679  | -0.899392 | 0.677203  |
| H | 4.410003  | -1.844666 | 0.922492  |
| C | 4.671095  | 0.274188  | 0.514421  |
| H | 5.753172  | 0.242383  | 0.630472  |
| C | -0.611104 | 2.763688  | 0.013544  |
| H | -0.580626 | 3.634859  | 0.687361  |
| H | -0.526445 | 1.880818  | 0.661154  |
| C | -1.959743 | 2.744746  | -0.727230 |
| C | -3.200155 | 2.648951  | 0.185240  |
| C | -3.413836 | 1.276958  | 0.856090  |
| H | -4.123111 | 1.387832  | 1.690194  |
| H | -2.469497 | 0.948389  | 1.310022  |
| H | -4.096236 | 2.902866  | -0.402277 |
| H | -3.122208 | 3.421703  | 0.965506  |
| H | -1.963722 | 1.911625  | -1.446833 |
| H | -2.037736 | 3.661632  | -1.331749 |
| C | -3.939920 | 0.186824  | -0.095260 |
| H | -5.005583 | 0.368023  | -0.299835 |
| H | -3.426933 | 0.254133  | -1.065102 |
| C | -3.772640 | -1.259570 | 0.437527  |
| H | -4.256850 | -1.350501 | 1.419703  |
| H | -4.295815 | -1.945642 | -0.243480 |

Sum of electronic and zero-point Energies= -965.895194  
Sum of electronic and thermal Energies= -965.874293  
Sum of electronic and thermal Enthalpies= -965.873349  
Sum of electronic and thermal Free Energies= -965.944824

daec[n=2]-1-E2 (dmf)

|   |           |          |           |
|---|-----------|----------|-----------|
| C | 1.531227  | 1.965842 | 0.500972  |
| H | 2.011997  | 2.080096 | 1.468062  |
| C | 2.317259  | 1.627652 | -0.614106 |
| C | 1.702790  | 1.521314 | -1.868365 |
| H | 2.299084  | 1.286736 | -2.748271 |
| C | 0.315372  | 1.654019 | -1.989058 |
| H | -0.179562 | 1.524369 | -2.949273 |
| C | -0.464421 | 1.902144 | -0.865359 |
| O | -1.847498 | 1.936178 | -0.967499 |

|   |           |           |           |
|---|-----------|-----------|-----------|
| C | 0.141731  | 2.104984  | 0.392612  |
| O | -0.695692 | 2.386588  | 1.423530  |
| C | -0.129208 | 2.550953  | 2.722523  |
| H | -0.970669 | 2.766047  | 3.387232  |
| H | 0.376504  | 1.635599  | 3.059362  |
| H | 0.578522  | 3.390895  | 2.748793  |
| C | -3.981248 | -1.423052 | 0.277363  |
| H | -4.559734 | -2.286631 | 0.602765  |
| C | -2.615932 | -1.575292 | -0.022623 |
| C | -1.976585 | -2.953863 | 0.107723  |
| H | -2.640071 | -3.668857 | -0.400358 |
| H | -2.000095 | -3.250290 | 1.168722  |
| C | -0.545894 | -3.148736 | -0.433469 |
| H | -0.455865 | -2.670608 | -1.420539 |
| H | -0.404930 | -4.224994 | -0.611694 |
| C | -1.898573 | -0.449228 | -0.444612 |
| H | -0.849371 | -0.538008 | -0.699152 |
| C | -2.522190 | 0.802135  | -0.548748 |
| C | -3.880851 | 0.945728  | -0.259901 |
| H | -4.350328 | 1.922229  | -0.351331 |
| C | -4.602627 | -0.178361 | 0.151821  |
| H | -5.662149 | -0.076779 | 0.380997  |
| C | 0.593592  | -2.668226 | 0.483867  |
| H | 0.519559  | -3.195094 | 1.448704  |
| H | 0.472752  | -1.600926 | 0.712215  |
| C | 1.983338  | -2.923511 | -0.126468 |
| C | 3.172247  | -2.478639 | 0.750222  |
| C | 3.362171  | -0.953271 | 0.871926  |
| H | 4.019048  | -0.736843 | 1.728004  |
| H | 2.396034  | -0.491794 | 1.113771  |
| H | 4.096672  | -2.923767 | 0.350243  |
| H | 3.043547  | -2.904892 | 1.757122  |
| H | 2.041322  | -2.430229 | -1.108961 |
| H | 2.081567  | -4.001558 | -0.327720 |
| C | 3.957364  | -0.288973 | -0.383036 |
| H | 5.031742  | -0.519537 | -0.438126 |
| H | 3.505085  | -0.718311 | -1.288326 |
| C | 3.774217  | 1.250555  | -0.440600 |
| H | 4.178320  | 1.704806  | 0.474858  |
| H | 4.363864  | 1.641176  | -1.281453 |

Sum of electronic and zero-point Energies= -965.895239  
Sum of electronic and thermal Energies= -965.874367  
Sum of electronic and thermal Enthalpies= -965.873423  
Sum of electronic and thermal Free Energies= -965.944659

daec[n=2]-2-TS (dmf)

|   |           |           |           |
|---|-----------|-----------|-----------|
| C | -2.893437 | -1.135959 | 0.004652  |
| H | -3.923490 | -1.471181 | 0.094077  |
| C | -2.598436 | 0.244095  | 0.059327  |
| C | -1.270190 | 0.592327  | -0.072060 |
| H | -0.990919 | 1.620685  | -0.086028 |
| C | -0.261804 | -0.337029 | -0.194820 |
| H | 0.739021  | 0.042492  | -0.235332 |
| C | -0.520540 | -1.693053 | -0.265737 |
| O | 0.509480  | -2.626366 | -0.426358 |
| C | -1.875984 | -2.104582 | -0.171056 |
| O | -2.097096 | -3.446966 | -0.251055 |
| C | -3.438020 | -3.915783 | -0.150284 |
| H | -3.379594 | -5.004447 | -0.241225 |
| H | -4.067577 | -3.517703 | -0.958683 |
| H | -3.885449 | -3.656614 | 0.819763  |
| C | 3.921788  | -0.628254 | 0.855813  |
| H | 4.709853  | -0.010513 | 1.283655  |
| C | 3.327567  | -0.247138 | -0.358739 |
| C | 3.626213  | 1.104734  | -1.001286 |
| H | 4.053824  | 0.950286  | -2.003528 |
| H | 4.401599  | 1.610610  | -0.409944 |
| C | 2.401064  | 2.058062  | -1.180697 |
| H | 1.652636  | 1.544777  | -1.801927 |
| H | 2.746645  | 2.912330  | -1.781921 |

|   |           |           |           |
|---|-----------|-----------|-----------|
| C | 2.335752  | -1.087776 | -0.892345 |
| H | 1.864427  | -0.833643 | -1.838925 |
| C | 1.772829  | -2.104353 | -0.107983 |
| C | 2.371655  | -2.484143 | 1.093142  |
| H | 1.936444  | -3.285079 | 1.686103  |
| C | 3.488180  | -1.768677 | 1.541200  |
| H | 3.969996  | -2.055230 | 2.474140  |
| C | 1.699507  | 2.594300  | 0.091944  |
| H | 2.400823  | 3.218696  | 0.665944  |
| H | 1.448300  | 1.752830  | 0.751612  |
| C | 0.399074  | 3.402145  | -0.210965 |
| C | -0.615003 | 3.466535  | 0.974344  |
| C | -2.124031 | 3.719392  | 0.650451  |
| H | -2.183778 | 4.708795  | 0.170952  |
| H | -2.630056 | 3.838518  | 1.621135  |
| H | -0.312607 | 4.290583  | 1.637837  |
| H | -0.518768 | 2.562045  | 1.588852  |
| H | -0.081878 | 2.962157  | -1.095485 |
| H | 0.663301  | 4.426029  | -0.513256 |
| C | -3.029482 | 2.792449  | -0.235106 |
| H | -3.927657 | 3.400309  | -0.414030 |
| H | -2.574240 | 2.657380  | -1.226652 |
| C | -3.562056 | 1.405469  | 0.263776  |
| H | -4.507623 | 1.202806  | -0.259572 |
| H | -3.830178 | 1.483167  | 1.330320  |

Sum of electronic and zero-point Energies= -965.842858  
Sum of electronic and thermal Energies= -965.823222  
Sum of electronic and thermal Enthalpies= -965.822278  
Sum of electronic and thermal Free Energies= -965.889161

daec[n=2]-2-E1 (dmf)

|   |           |           |           |
|---|-----------|-----------|-----------|
| C | -1.739571 | -1.697799 | -0.532313 |
| H | -2.282233 | -1.788481 | -1.469021 |
| C | -2.428658 | -1.260487 | 0.614574  |
| C | -1.735699 | -1.183183 | 1.827493  |
| H | -2.256440 | -0.875707 | 2.732151  |
| C | -0.364260 | -1.459814 | 1.878129  |
| H | 0.192138  | -1.362000 | 2.807970  |
| C | 0.320866  | -1.831501 | 0.727864  |
| O | 1.692945  | -2.040998 | 0.776687  |
| C | -0.370130 | -1.988002 | -0.492906 |
| O | 0.374781  | -2.384648 | -1.556396 |
| C | -0.274405 | -2.508963 | -2.820805 |
| H | 0.501176  | -2.831749 | -3.521119 |
| H | -0.690464 | -1.548419 | -3.154765 |
| H | -1.073163 | -3.262607 | -2.789990 |
| C | 4.210863  | 1.225208  | 0.152604  |
| H | 4.886063  | 2.068163  | 0.011934  |
| C | 2.847883  | 1.364659  | -0.160891 |
| C | 2.323707  | 2.694024  | -0.696181 |
| H | 2.961041  | 2.989436  | -1.542731 |
| H | 2.487542  | 3.468514  | 0.070138  |
| C | 0.851440  | 2.729669  | -1.147870 |
| H | 0.658736  | 1.869407  | -1.806199 |
| H | 0.706760  | 3.620280  | -1.775861 |
| C | 2.007710  | 0.260486  | 0.027933  |
| H | 0.955705  | 0.333120  | -0.213599 |
| C | 2.502335  | -0.945708 | 0.538499  |
| C | 3.860098  | -1.083350 | 0.838593  |
| H | 4.233435  | -2.026661 | 1.230068  |
| C | 4.706122  | 0.011367  | 0.637083  |
| H | 5.765260  | -0.085643 | 0.870031  |
| C | -0.185488 | 2.751385  | -0.005989 |
| H | -0.210596 | 3.757128  | 0.441422  |
| H | 0.130389  | 2.075847  | 0.800817  |
| C | -1.597765 | 2.343248  | -0.458771 |
| C | -2.588463 | 2.202543  | 0.706878  |
| C | -4.011371 | 1.759341  | 0.314332  |
| H | -4.435060 | 2.515374  | -0.365790 |
| H | -4.641536 | 1.784162  | 1.217295  |

|                                                          |           |           |           |
|----------------------------------------------------------|-----------|-----------|-----------|
| H                                                        | -2.668717 | 3.171628  | 1.224373  |
| H                                                        | -2.172671 | 1.502310  | 1.444137  |
| H                                                        | -1.526839 | 1.386202  | -0.995802 |
| H                                                        | -1.982588 | 3.073939  | -1.188617 |
| C                                                        | -4.190633 | 0.381924  | -0.358273 |
| H                                                        | -5.243210 | 0.315431  | -0.669916 |
| H                                                        | -3.603343 | 0.329714  | -1.285798 |
| C                                                        | -3.891935 | -0.870993 | 0.507423  |
| H                                                        | -4.443791 | -1.714576 | 0.067159  |
| H                                                        | -4.305263 | -0.723969 | 1.514966  |
| Sum of electronic and zero-point Energies= -965.893568   |           |           |           |
| Sum of electronic and thermal Energies= -965.872722      |           |           |           |
| Sum of electronic and thermal Enthalpies= -965.871778    |           |           |           |
| Sum of electronic and thermal Free Energies= -965.942718 |           |           |           |

daec[n=2]-2-E2 (dmf)

|                                                          |           |           |           |
|----------------------------------------------------------|-----------|-----------|-----------|
| C                                                        | -1.656363 | -1.690084 | 0.538807  |
| H                                                        | -2.136107 | -1.761414 | 1.510525  |
| C                                                        | -2.427211 | -1.312031 | -0.573257 |
| C                                                        | -1.814070 | -1.264192 | -1.832746 |
| H                                                        | -2.398980 | -1.006508 | -2.713743 |
| C                                                        | -0.443300 | -1.510982 | -1.964202 |
| H                                                        | 0.049043  | -1.438978 | -2.931769 |
| C                                                        | 0.325597  | -1.815210 | -0.846400 |
| O                                                        | 1.697757  | -1.990016 | -0.966155 |
| C                                                        | -0.282527 | -1.940333 | 0.420920  |
| O                                                        | 0.538486  | -2.274395 | 1.449583  |
| C                                                        | -0.024967 | -2.365385 | 2.757041  |
| H                                                        | 0.803481  | -2.635797 | 3.417902  |
| H                                                        | -0.799088 | -3.143337 | 2.808102  |
| H                                                        | -0.449418 | -1.404707 | 3.079658  |
| C                                                        | 4.149449  | 1.174053  | 0.209823  |
| H                                                        | 4.804856  | 1.983419  | 0.528804  |
| C                                                        | 2.806038  | 1.447628  | -0.100929 |
| C                                                        | 2.277115  | 2.875234  | 0.000322  |
| H                                                        | 2.904981  | 3.513883  | -0.639126 |
| H                                                        | 2.449239  | 3.238538  | 1.025813  |
| C                                                        | 0.800749  | 3.097311  | -0.377438 |
| H                                                        | 0.608702  | 2.641701  | -1.360249 |
| H                                                        | 0.641526  | 4.176096  | -0.516842 |
| C                                                        | 1.991564  | 0.384916  | -0.509690 |
| H                                                        | 0.956744  | 0.562883  | -0.772634 |
| C                                                        | 2.489352  | -0.921800 | -0.580062 |
| C                                                        | 3.828034  | -1.187440 | -0.284682 |
| H                                                        | 4.204010  | -2.205670 | -0.349579 |
| C                                                        | 4.651011  | -0.126294 | 0.106224  |
| H                                                        | 5.695443  | -0.322724 | 0.342895  |
| C                                                        | -0.221355 | 2.568743  | 0.648944  |
| H                                                        | -0.246742 | 3.246554  | 1.516383  |
| H                                                        | 0.111156  | 1.597183  | 1.039949  |
| C                                                        | -1.637784 | 2.401953  | 0.073338  |
| C                                                        | -2.617962 | 1.762839  | 1.068799  |
| C                                                        | -4.042499 | 1.518558  | 0.534629  |
| H                                                        | -4.476579 | 2.488813  | 0.244994  |
| H                                                        | -4.663014 | 1.151269  | 1.367172  |
| H                                                        | -2.697863 | 2.413401  | 1.954080  |
| H                                                        | -2.191566 | 0.817223  | 1.430145  |
| H                                                        | -1.575000 | 1.780409  | -0.831936 |
| H                                                        | -2.026219 | 3.379700  | -0.255032 |
| C                                                        | -4.225196 | 0.556930  | -0.658565 |
| H                                                        | -5.284835 | 0.610683  | -0.947876 |
| H                                                        | -3.661024 | 0.916301  | -1.530544 |
| C                                                        | -3.891146 | -0.940587 | -0.417843 |
| H                                                        | -4.473945 | -1.528690 | -1.141508 |
| H                                                        | -4.245913 | -1.237894 | 0.578787  |
| Sum of electronic and zero-point Energies= -965.893623   |           |           |           |
| Sum of electronic and thermal Energies= -965.872821      |           |           |           |
| Sum of electronic and thermal Enthalpies= -965.871876    |           |           |           |
| Sum of electronic and thermal Free Energies= -965.942431 |           |           |           |

|                                                          |           |           |           |
|----------------------------------------------------------|-----------|-----------|-----------|
| daec[n=2]-3-TS (dmf)                                     |           |           |           |
| C                                                        | -3.206698 | 0.763583  | 0.046493  |
| H                                                        | -4.247675 | 1.062603  | 0.138060  |
| C                                                        | -2.167400 | 1.721293  | 0.121506  |
| C                                                        | -0.903707 | 1.211679  | -0.010225 |
| H                                                        | -0.108319 | 1.894732  | -0.003903 |
| C                                                        | -0.582806 | -0.112752 | -0.129292 |
| H                                                        | 0.463482  | -0.352366 | -0.137227 |
| C                                                        | -1.567781 | -1.070984 | -0.237322 |
| O                                                        | -1.229376 | -2.416457 | -0.424005 |
| C                                                        | -2.916107 | -0.616471 | -0.153790 |
| O                                                        | -3.868917 | -1.587112 | -0.264056 |
| C                                                        | -5.237466 | -1.206898 | -0.170771 |
| H                                                        | -5.811176 | -2.131318 | -0.286465 |
| H                                                        | -5.518010 | -0.504283 | -0.968345 |
| H                                                        | -5.467773 | -0.757814 | 0.805906  |
| C                                                        | 2.750756  | -2.682119 | 0.799725  |
| H                                                        | 3.760089  | -2.636845 | 1.205618  |
| C                                                        | 2.463709  | -2.030903 | -0.412250 |
| C                                                        | 3.499161  | -1.140737 | -1.101642 |
| H                                                        | 3.560579  | -1.433889 | -2.159607 |
| H                                                        | 4.488311  | -1.341561 | -0.667510 |
| C                                                        | 3.224540  | 0.404504  | -1.082700 |
| H                                                        | 2.169143  | 0.558616  | -1.335369 |
| H                                                        | 3.795489  | 0.840161  | -1.916205 |
| C                                                        | 1.154687  | -2.145370 | -0.919400 |
| H                                                        | 0.898511  | -1.659652 | -1.858823 |
| C                                                        | 0.123645  | -2.677623 | -0.126516 |
| C                                                        | 0.422792  | -3.327983 | 1.070212  |
| H                                                        | -0.379407 | -3.749086 | 1.671644  |
| C                                                        | 1.753640  | -3.367048 | 1.502615  |
| H                                                        | 2.000020  | -3.877121 | 2.432002  |
| C                                                        | 3.592189  | 1.184513  | 0.208463  |
| H                                                        | 4.685188  | 1.154138  | 0.332098  |
| H                                                        | 3.173961  | 0.660733  | 1.082098  |
| C                                                        | 3.120677  | 2.679594  | 0.285942  |
| C                                                        | 1.580343  | 2.711378  | 0.219045  |
| C                                                        | 0.654293  | 3.935447  | 0.541261  |
| H                                                        | 1.138437  | 4.847001  | 0.161561  |
| H                                                        | 0.581019  | 4.065603  | 1.631135  |
| H                                                        | 1.294395  | 1.896002  | 0.890309  |
| H                                                        | 1.340073  | 2.389007  | -0.800890 |
| H                                                        | 3.572790  | 3.268831  | -0.526277 |
| H                                                        | 3.494268  | 3.100741  | 1.231106  |
| C                                                        | -0.812015 | 3.989826  | -0.101779 |
| H                                                        | -0.701312 | 3.786929  | -1.177947 |
| H                                                        | -1.088263 | 5.051249  | -0.033016 |
| C                                                        | -2.126201 | 3.233052  | 0.388364  |
| H                                                        | -2.261777 | 3.413818  | 1.466974  |
| H                                                        | -2.967199 | 3.746426  | -0.100070 |
| Sum of electronic and zero-point Energies= -965.814187   |           |           |           |
| Sum of electronic and thermal Energies= -965.794260      |           |           |           |
| Sum of electronic and thermal Enthalpies= -965.793316    |           |           |           |
| Sum of electronic and thermal Free Energies= -965.860922 |           |           |           |

daec[n=2]-3-E1 (dmf)

|   |           |           |           |
|---|-----------|-----------|-----------|
| C | -1.992149 | -1.663827 | -0.477977 |
| H | -2.544903 | -1.754258 | -1.408807 |
| C | -2.640930 | -1.133738 | 0.652248  |
| C | -1.937828 | -1.050354 | 1.858763  |
| H | -2.430585 | -0.665300 | 2.749352  |
| C | -0.583714 | -1.400032 | 1.912902  |
| H | -0.015018 | -1.298673 | 2.834923  |
| C | 0.070928  | -1.848845 | 0.772384  |
| O | 1.424824  | -2.147018 | 0.825730  |
| C | -0.639494 | -2.022820 | -0.435462 |
| O | 0.074157  | -2.504962 | -1.484914 |
| C | -0.593546 | -2.653852 | -2.736901 |
| H | 0.157255  | -3.048041 | -3.427651 |
| H | -0.963256 | -1.689755 | -3.112313 |

|   |           |           |           |
|---|-----------|-----------|-----------|
| H | -1.429171 | -3.363408 | -2.664739 |
| C | 4.236427  | 0.827051  | 0.034253  |
| H | 4.990386  | 1.590702  | -0.151683 |
| C | 2.890264  | 1.092714  | -0.269298 |
| C | 2.521269  | 2.431795  | -0.901749 |
| H | 2.962866  | 2.453635  | -1.910347 |
| H | 3.035976  | 3.230695  | -0.346375 |
| C | 1.026186  | 2.777231  | -1.022613 |
| H | 0.503543  | 1.952338  | -1.524886 |
| H | 0.933073  | 3.640021  | -1.698734 |
| C | 1.939019  | 0.094799  | -0.014480 |
| H | 0.893264  | 0.272880  | -0.234855 |
| C | 2.321704  | -1.137034 | 0.532982  |
| C | 3.664572  | -1.401006 | 0.818061  |
| H | 3.944321  | -2.362697 | 1.241569  |
| C | 4.614965  | -0.409206 | 0.563750  |
| H | 5.662017  | -0.603945 | 0.789859  |
| C | 0.337290  | 3.119958  | 0.310148  |
| H | 0.769568  | 4.056155  | 0.695821  |
| H | 0.572399  | 2.347982  | 1.057647  |
| C | -1.195615 | 3.262152  | 0.228485  |
| C | -1.908402 | 1.953845  | -0.157517 |
| C | -3.421674 | 1.948609  | 0.120790  |
| H | -3.872268 | 2.819492  | -0.380739 |
| H | -3.597427 | 2.098773  | 1.198228  |
| H | -1.434657 | 1.132831  | 0.391826  |
| H | -1.746347 | 1.741888  | -1.224673 |
| H | -1.464484 | 4.061963  | -0.480013 |
| H | -1.561279 | 3.592438  | 1.213290  |
| C | -4.177124 | 0.686960  | -0.350930 |
| H | -3.869787 | 0.444957  | -1.379589 |
| H | -5.249781 | 0.924316  | -0.404718 |
| C | -4.047757 | -0.582700 | 0.530725  |
| H | -4.432838 | -0.359239 | 1.535242  |
| H | -4.711058 | -1.350117 | 0.104442  |

Sum of electronic and zero-point Energies= -965.894453  
Sum of electronic and thermal Energies= -965.873522  
Sum of electronic and thermal Enthalpies= -965.872578  
Sum of electronic and thermal Free Energies= -965.943999

#### daec[n=2]-3-E2 (dmf)

|   |           |           |           |
|---|-----------|-----------|-----------|
| C | -1.890395 | -1.585493 | 0.634108  |
| H | -2.365309 | -1.540000 | 1.609852  |
| C | -2.645591 | -1.256461 | -0.504271 |
| C | -2.043003 | -1.346986 | -1.765295 |
| H | -2.618053 | -1.124547 | -2.662257 |
| C | -0.686055 | -1.668293 | -1.877823 |
| H | -0.196476 | -1.702632 | -2.848875 |
| C | 0.075115  | -1.912158 | -0.739743 |
| O | 1.431722  | -2.180052 | -0.849672 |
| C | -0.531208 | -1.909641 | 0.534984  |
| O | 0.278687  | -2.200930 | 1.584973  |
| C | -0.281431 | -2.159215 | 2.896616  |
| H | 0.536031  | -2.417528 | 3.575688  |
| H | -1.093357 | -2.890571 | 3.010279  |
| H | -0.655622 | -1.155764 | 3.142067  |
| C | 4.169796  | 0.845861  | 0.007218  |
| H | 4.902282  | 1.617733  | 0.239215  |
| C | 2.850759  | 1.213690  | -0.307896 |
| C | 2.479974  | 2.692007  | -0.376293 |
| H | 2.925574  | 3.106500  | -1.294516 |
| H | 2.985224  | 3.214000  | 0.450129  |
| C | 0.982150  | 3.048269  | -0.365349 |
| H | 0.474260  | 2.511228  | -1.177395 |
| H | 0.887374  | 4.115798  | -0.613847 |
| C | 1.927122  | 0.199175  | -0.596174 |
| H | 0.903571  | 0.450989  | -0.848741 |
| C | 2.308063  | -1.148212 | -0.561828 |
| C | 3.625433  | -1.507496 | -0.265273 |
| H | 3.904547  | -2.558226 | -0.246407 |

|   |           |           |           |
|---|-----------|-----------|-----------|
| C | 4.550285  | -0.498866 | 0.016681  |
| H | 5.577127  | -0.769153 | 0.257349  |
| C | 0.275070  | 2.786166  | 0.975150  |
| H | 0.694913  | 3.467032  | 1.731714  |
| H | 0.508835  | 1.768352  | 1.321034  |
| C | -1.257844 | 2.943833  | 0.942910  |
| C | -1.959697 | 1.930391  | 0.019694  |
| C | -3.463583 | 1.762235  | 0.299665  |
| H | -3.945027 | 2.749718  | 0.222426  |
| H | -3.607431 | 1.440268  | 1.343718  |
| H | -1.458403 | 0.962594  | 0.130238  |
| H | -1.826634 | 2.225439  | -1.031677 |
| H | -1.527445 | 3.971218  | 0.650481  |
| H | -1.634265 | 2.811914  | 1.969331  |
| C | -4.211986 | 0.792374  | -0.640835 |
| H | -3.916859 | 0.994385  | -1.681611 |
| H | -5.287751 | 1.014407  | -0.583285 |
| C | -4.057063 | -0.724771 | -0.354166 |
| H | -4.418890 | -0.932526 | 0.662307  |
| H | -4.726962 | -1.261219 | -1.042107 |

Sum of electronic and zero-point Energies= -965.894697  
Sum of electronic and thermal Energies= -965.873767  
Sum of electronic and thermal Enthalpies= -965.872823  
Sum of electronic and thermal Free Energies= -965.944148

#### daec[n=2]-4-TS (dmf)

|   |           |           |           |
|---|-----------|-----------|-----------|
| C | -3.109422 | 0.327137  | 0.057076  |
| H | -4.171945 | 0.517070  | 0.185595  |
| C | -2.196983 | 1.404171  | 0.122943  |
| C | -0.864195 | 1.085262  | -0.059450 |
| H | -0.104788 | 1.835289  | -0.052856 |
| C | -0.430326 | -0.207604 | -0.239295 |
| H | 0.628859  | -0.339985 | -0.312127 |
| C | -1.297623 | -1.280576 | -0.311108 |
| O | -0.828135 | -2.585554 | -0.507649 |
| C | -2.681956 | -1.003399 | -0.170848 |
| O | -3.517639 | -2.075914 | -0.257750 |
| C | -4.916618 | -1.854151 | -0.109346 |
| H | -5.386005 | -2.836562 | -0.216574 |
| H | -5.304048 | -1.180416 | -0.886619 |
| H | -5.158347 | -1.443217 | 0.881113  |
| C | 3.094986  | -2.352762 | 0.830191  |
| H | 4.066586  | -2.148941 | 1.277532  |
| C | 2.751140  | -1.739959 | -0.386342 |
| C | 3.607136  | -0.634889 | -0.994943 |
| H | 3.831650  | -0.879752 | -2.043709 |
| H | 4.570788  | -0.604377 | -0.468154 |
| C | 2.991839  | 0.808014  | -0.997193 |
| H | 2.071269  | 0.802308  | -1.597404 |
| H | 3.704595  | 1.434803  | -1.554701 |
| C | 1.503305  | -2.058812 | -0.948601 |
| H | 1.211099  | -1.615638 | -1.898113 |
| C | 0.531476  | -2.714745 | -0.180046 |
| C | 0.878229  | -3.328635 | 1.023437  |
| H | 0.121113  | -3.851097 | 1.603452  |
| C | 2.189761  | -3.189569 | 1.493016  |
| H | 2.478614  | -3.668176 | 2.426905  |
| C | 2.732530  | 1.479420  | 0.374548  |
| H | 3.617094  | 1.306188  | 1.007289  |
| H | 1.900811  | 0.985429  | 0.894502  |
| C | 2.512926  | 3.024676  | 0.346876  |
| C | 1.210265  | 3.628764  | -0.260978 |
| C | -0.005539 | 3.835894  | 0.705982  |
| H | 0.152343  | 4.785984  | 1.234670  |
| H | -0.002828 | 3.072022  | 1.494049  |
| H | 0.907547  | 3.036013  | -1.134924 |
| H | 1.463608  | 4.615807  | -0.673537 |
| H | 3.366048  | 3.457323  | -0.197573 |
| H | 2.612130  | 3.390114  | 1.380556  |
| C | -1.410048 | 3.880019  | -0.005092 |

|   |           |          |           |
|---|-----------|----------|-----------|
| H | -1.840648 | 4.879650 | 0.139421  |
| H | -1.262150 | 3.778798 | -1.090223 |
| C | -2.515584 | 2.863381 | 0.423959  |
| H | -3.453879 | 3.158029 | -0.068426 |
| H | -2.705097 | 2.975260 | 1.504339  |

Sum of electronic and zero-point Energies= -965.840755  
Sum of electronic and thermal Energies= -965.821031  
Sum of electronic and thermal Enthalpies= -965.820087  
Sum of electronic and thermal Free Energies= -965.887180

daec[n=2]-4-E1 (dmf)

|   |           |           |           |
|---|-----------|-----------|-----------|
| C | -1.759317 | -1.987109 | -0.496791 |
| H | -2.301924 | -2.083148 | -1.433133 |
| C | -2.445191 | -1.535835 | 0.645333  |
| C | -1.754443 | -1.443256 | 1.858483  |
| H | -2.275735 | -1.119648 | 2.757180  |
| C | -0.375791 | -1.675404 | 1.902761  |
| H | 0.186399  | -1.539902 | 2.824350  |
| C | 0.313144  | -2.019891 | 0.746758  |
| O | 1.696577  | -2.121643 | 0.776357  |
| C | -0.381772 | -2.236978 | -0.462167 |
| O | 0.369110  | -2.625289 | -1.524364 |
| C | -0.286885 | -2.804342 | -2.778721 |
| H | 0.492463  | -3.120808 | -3.477725 |
| H | -0.736893 | -1.867265 | -3.134582 |
| H | -1.060511 | -3.582152 | -2.719548 |
| C | 3.969947  | 1.300885  | 0.066372  |
| H | 4.585774  | 2.183020  | -0.102916 |
| C | 2.607880  | 1.329631  | -0.278738 |
| C | 2.045505  | 2.572483  | -0.960313 |
| H | 2.416130  | 2.568340  | -1.997993 |
| H | 2.505918  | 3.457361  | -0.496252 |
| C | 0.518687  | 2.774944  | -1.011379 |
| H | 0.039962  | 1.899371  | -1.471723 |
| H | 0.334449  | 3.609752  | -1.704735 |
| C | 1.834117  | 0.184792  | -0.043546 |
| H | 0.779975  | 0.186289  | -0.296522 |
| C | 2.410319  | -0.965598 | 0.515257  |
| C | 3.769917  | -0.993265 | 0.839255  |
| H | 4.198980  | -1.893532 | 1.272616  |
| C | 4.541444  | 0.148368  | 0.611260  |
| H | 5.598904  | 0.138003  | 0.870075  |
| C | -0.149510 | 3.108028  | 0.333954  |
| H | 0.450263  | 3.881835  | 0.838053  |
| H | -0.122759 | 2.231557  | 0.996370  |
| C | -1.593314 | 3.642783  | 0.208716  |
| C | -2.635727 | 2.682140  | -0.399331 |
| C | -2.924620 | 1.447306  | 0.466885  |
| H | -3.377105 | 1.762471  | 1.420815  |
| H | -1.970291 | 0.976445  | 0.729932  |
| H | -2.296428 | 2.352843  | -1.393230 |
| H | -3.569319 | 3.240001  | -0.570781 |
| H | -1.567553 | 4.560039  | -0.400154 |
| H | -1.938168 | 3.952995  | 1.207598  |
| C | -3.822166 | 0.398332  | -0.211361 |
| H | -4.852492 | 0.775427  | -0.292718 |
| H | -3.469594 | 0.239367  | -1.241502 |
| C | -3.846933 | -0.978298 | 0.508001  |
| H | -4.487610 | -1.662270 | -0.066345 |
| H | -4.300091 | -0.869222 | 1.502784  |

Sum of electronic and zero-point Energies= -965.893875  
Sum of electronic and thermal Energies= -965.872977  
Sum of electronic and thermal Enthalpies= -965.872033  
Sum of electronic and thermal Free Energies= -965.943527

daec[n=2]-4-E2 (dmf)

|   |           |           |           |
|---|-----------|-----------|-----------|
| C | -1.646440 | -1.930252 | 0.606086  |
| H | -2.119568 | -1.913992 | 1.583623  |
| C | -2.426350 | -1.655904 | -0.530362 |
| C | -1.825410 | -1.710957 | -1.793953 |

|   |           |           |           |
|---|-----------|-----------|-----------|
| H | -2.418737 | -1.530949 | -2.688634 |
| C | -0.444976 | -1.910837 | -1.909284 |
| H | 0.045385  | -1.891466 | -2.880347 |
| C | 0.336704  | -2.066758 | -0.770350 |
| O | 1.719201  | -2.125696 | -0.868462 |
| C | -0.265725 | -2.135661 | 0.503915  |
| O | 0.569789  | -2.349237 | 1.552669  |
| C | 0.008603  | -2.363013 | 2.864202  |
| H | 0.845883  | -2.549627 | 3.542655  |
| H | -0.734610 | -3.164571 | 2.974627  |
| H | -0.454188 | -1.398193 | 3.113329  |
| C | 3.868863  | 1.316743  | 0.095030  |
| H | 4.449634  | 2.200705  | 0.354422  |
| C | 2.542336  | 1.463609  | -0.344792 |
| C | 1.971464  | 2.863550  | -0.540422 |
| H | 2.324155  | 3.227155  | -1.519236 |
| H | 2.436497  | 3.531298  | 0.199434  |
| C | 0.442499  | 3.056534  | -0.495365 |
| H | -0.039339 | 2.410888  | -1.242600 |
| H | 0.243401  | 4.087757  | -0.824930 |
| C | 1.814168  | 0.308742  | -0.663697 |
| H | 0.790273  | 0.393360  | -1.011719 |
| C | 2.398118  | -0.960437 | -0.547482 |
| C | 3.724675  | -1.098341 | -0.131077 |
| H | 4.160755  | -2.090961 | -0.048400 |
| C | 4.452428  | 0.050222  | 0.188792  |
| H | 5.483071  | -0.047423 | 0.525808  |
| C | -0.204374 | 2.854080  | 0.885200  |
| H | 0.389722  | 3.403840  | 1.631871  |
| H | -0.144327 | 1.796099  | 1.176915  |
| C | -1.661655 | 3.356672  | 0.983576  |
| C | -2.699929 | 2.651580  | 0.086604  |
| C | -2.932585 | 1.176817  | 0.445967  |
| H | -3.339684 | 1.105336  | 1.467490  |
| H | -1.961170 | 0.670113  | 0.474708  |
| H | -2.385085 | 2.719890  | -0.965797 |
| H | -3.650834 | 3.202773  | 0.151970  |
| H | -1.670330 | 4.432406  | 0.748046  |
| H | -1.988091 | 3.274769  | 2.032232  |
| C | -3.852839 | 0.425861  | -0.531217 |
| H | -4.888777 | 0.780872  | -0.424301 |
| H | -3.549673 | 0.662375  | -1.562257 |
| C | -3.833392 | -1.119345 | -0.366476 |
| H | -4.507149 | -1.559345 | -1.114813 |
| H | -4.226229 | -1.391080 | 0.622877  |

Sum of electronic and zero-point Energies= -965.893919  
Sum of electronic and thermal Energies= -965.873129  
Sum of electronic and thermal Enthalpies= -965.872185  
Sum of electronic and thermal Free Energies= -965.942952

daec[n=2]-5-TS (dmf)

|   |           |           |           |
|---|-----------|-----------|-----------|
| C | -2.953793 | -1.088638 | 0.053072  |
| H | -3.972936 | -1.428247 | 0.218652  |
| C | -2.671939 | 0.295311  | 0.069228  |
| C | -1.356760 | 0.659654  | -0.156476 |
| H | -1.074222 | 1.689501  | -0.201022 |
| C | -0.349506 | -0.269698 | -0.324880 |
| H | 0.648586  | 0.111429  | -0.421779 |
| C | -0.600871 | -1.628875 | -0.350405 |
| O | 0.414013  | -2.569390 | -0.542134 |
| C | -1.944159 | -2.050943 | -0.171446 |
| O | -2.157534 | -3.395452 | -0.216976 |
| C | -3.484929 | -3.873121 | -0.020621 |
| H | -3.423304 | -4.962457 | -0.100437 |
| H | -4.170214 | -3.491192 | -0.790477 |
| H | -3.868824 | -3.603555 | 0.973501  |
| C | 3.995901  | -0.882485 | 0.753810  |
| H | 4.853044  | -0.367774 | 1.185745  |
| C | 3.363176  | -0.343866 | -0.381361 |
| C | 3.690314  | 1.065035  | -0.859681 |

|   |           |           |           |
|---|-----------|-----------|-----------|
| H | 3.435011  | 1.178391  | -1.921962 |
| H | 4.771800  | 1.232478  | -0.772856 |
| C | 2.950104  | 2.166734  | -0.013064 |
| H | 3.645618  | 3.001701  | 0.149511  |
| H | 2.750868  | 1.750308  | 0.984460  |
| C | 2.290197  | -1.058285 | -0.934007 |
| H | 1.822678  | -0.700362 | -1.847284 |
| C | 1.696673  | -2.111235 | -0.219195 |
| C | 2.326288  | -2.640720 | 0.906300  |
| H | 1.870351  | -3.471510 | 1.439467  |
| C | 3.513533  | -2.048100 | 1.355370  |
| H | 4.022360  | -2.460483 | 2.224704  |
| C | 1.630045  | 2.733858  | -0.601963 |
| H | 1.111088  | 1.953556  | -1.173790 |
| H | 1.868976  | 3.520711  | -1.333697 |
| C | 0.655479  | 3.289305  | 0.468948  |
| C | -0.705546 | 3.820630  | -0.090649 |
| C | -1.990166 | 3.485458  | 0.757500  |
| H | -2.345074 | 4.413268  | 1.224269  |
| H | -1.712842 | 2.832170  | 1.595705  |
| H | -0.842466 | 3.433953  | -1.110510 |
| H | -0.636498 | 4.909699  | -0.214237 |
| H | 1.156650  | 4.084436  | 1.040672  |
| H | 0.462542  | 2.485124  | 1.193344  |
| C | -3.195184 | 2.844656  | -0.026202 |
| H | -4.071797 | 3.494249  | 0.097187  |
| H | -2.972194 | 2.854448  | -1.103049 |
| C | -3.666935 | 1.410102  | 0.362197  |
| H | -3.916348 | 1.396131  | 1.436069  |
| H | -4.616215 | 1.214109  | -0.158158 |

Sum of electronic and zero-point Energies= -965.844758  
Sum of electronic and thermal Energies= -965.824863  
Sum of electronic and thermal Enthalpies= -965.823919  
Sum of electronic and thermal Free Energies= -965.891589

daec[n=2]-5-E1 (dmf)

|   |           |           |           |
|---|-----------|-----------|-----------|
| C | -1.954628 | -1.635801 | -0.425311 |
| H | -2.448715 | -1.825918 | -1.374110 |
| C | -2.693845 | -1.059555 | 0.625518  |
| C | -2.060406 | -0.845306 | 1.854279  |
| H | -2.619763 | -0.423851 | 2.687022  |
| C | -0.702615 | -1.151761 | 2.019613  |
| H | -0.200401 | -0.974431 | 2.968239  |
| C | 0.033037  | -1.669619 | 0.962112  |
| O | 1.375569  | -1.979133 | 1.124935  |
| C | -0.596166 | -1.937115 | -0.276419 |
| O | 0.194365  | -2.471111 | -1.242211 |
| C | -0.387331 | -2.727211 | -2.519360 |
| H | 0.416990  | -3.142528 | -3.133194 |
| H | -0.760094 | -1.803631 | -2.983154 |
| H | -1.205276 | -3.457256 | -2.448964 |
| C | 4.276503  | 0.625951  | -0.350588 |
| H | 5.049517  | 1.287023  | -0.740233 |
| C | 3.017906  | 1.154264  | -0.013848 |
| C | 2.767487  | 2.649967  | -0.190292 |
| H | 2.950464  | 2.909400  | -1.245077 |
| H | 3.542351  | 3.188525  | 0.375695  |
| C | 1.386479  | 3.181089  | 0.231678  |
| H | 1.441837  | 4.277277  | 0.292243  |
| H | 1.169476  | 2.838259  | 1.254157  |
| C | 2.043820  | 0.279376  | 0.487550  |
| H | 1.068061  | 0.650932  | 0.777272  |
| C | 2.310597  | -1.088509 | 0.625799  |
| C | 3.566851  | -1.605283 | 0.302491  |
| H | 3.758185  | -2.668951 | 0.421905  |
| C | 4.546569  | -0.734278 | -0.182949 |
| H | 5.528447  | -1.127003 | -0.441897 |
| C | 0.231453  | 2.774782  | -0.705554 |
| H | 0.396651  | 1.747161  | -1.056843 |
| H | 0.252740  | 3.403036  | -1.608973 |

|   |           |           |           |
|---|-----------|-----------|-----------|
| C | -1.158139 | 2.836124  | -0.044899 |
| C | -2.206871 | 2.001050  | -0.793393 |
| C | -3.560648 | 1.858795  | -0.067421 |
| H | -4.167604 | 2.756897  | -0.251399 |
| H | -3.393171 | 1.830157  | 1.020107  |
| H | -1.782453 | 1.001333  | -0.949915 |
| H | -2.375805 | 2.414406  | -1.800314 |
| H | -1.490459 | 3.880875  | 0.060607  |
| H | -1.076569 | 2.439004  | 0.979027  |
| C | -4.352969 | 0.599144  | -0.489789 |
| H | -5.431158 | 0.812690  | -0.480604 |
| H | -4.105164 | 0.344041  | -1.530822 |
| C | -4.138118 | -0.644854 | 0.413355  |
| H | -4.588418 | -0.440774 | 1.394390  |
| H | -4.702954 | -1.482210 | -0.022371 |

Sum of electronic and zero-point Energies= -965.892063  
Sum of electronic and thermal Energies= -965.871087  
Sum of electronic and thermal Enthalpies= -965.870143  
Sum of electronic and thermal Free Energies= -965.941469

daec[n=2]-5-E2 (dmf)

|   |           |           |           |
|---|-----------|-----------|-----------|
| C | -1.958859 | -1.399076 | 0.745775  |
| H | -2.474469 | -1.266704 | 1.692455  |
| C | -2.677363 | -1.221627 | -0.449001 |
| C | -2.017705 | -1.426784 | -1.668640 |
| H | -2.559101 | -1.317701 | -2.606599 |
| C | -0.655824 | -1.742212 | -1.690460 |
| H | -0.128958 | -1.883652 | -2.631865 |
| C | 0.058614  | -1.875173 | -0.502932 |
| O | 1.404386  | -2.211107 | -0.547288 |
| C | -0.595754 | -1.731018 | 0.737332  |
| O | 0.169059  | -1.912145 | 1.844477  |
| C | -0.445672 | -1.741397 | 3.120769  |
| H | 0.343083  | -1.924851 | 3.855769  |
| H | -1.260469 | -2.462262 | 3.273786  |
| H | -0.831389 | -0.720464 | 3.247379  |
| C | 4.345311  | 0.737458  | -0.391892 |
| H | 5.132707  | 1.489517  | -0.366603 |
| C | 3.024022  | 1.106235  | -0.086660 |
| C | 2.720845  | 2.559940  | 0.268401  |
| H | 2.869503  | 3.177946  | -0.631931 |
| H | 3.491759  | 2.895991  | 0.976707  |
| C | 1.331735  | 2.857496  | 0.862645  |
| H | 1.374506  | 3.828087  | 1.376870  |
| H | 1.115441  | 2.114988  | 1.644990  |
| C | 2.032145  | 0.115104  | -0.119786 |
| H | 1.005885  | 0.360319  | 0.121721  |
| C | 2.346587  | -1.204082 | -0.467884 |
| C | 3.664252  | -1.565848 | -0.762812 |
| H | 3.892064  | -2.595758 | -1.026955 |
| C | 4.657656  | -0.584714 | -0.718546 |
| H | 5.686709  | -0.857498 | -0.946556 |
| C | 0.180046  | 2.875682  | -0.163814 |
| H | 0.349538  | 2.093120  | -0.915546 |
| H | 0.199718  | 3.825064  | -0.720035 |
| C | -1.209663 | 2.651071  | 0.461966  |
| C | -2.247383 | 2.141499  | -0.548560 |
| C | -3.598643 | 1.733406  | 0.073850  |
| H | -4.212823 | 2.632531  | 0.226558  |
| H | -3.429319 | 1.315465  | 1.078097  |
| H | -1.813932 | 1.273851  | -1.062045 |
| H | -2.420194 | 2.896047  | -1.332132 |
| H | -1.563452 | 3.569613  | 0.955908  |
| H | -1.117411 | 1.896396  | 1.258623  |
| C | -4.385787 | 0.705938  | -0.771586 |
| H | -5.465546 | 0.876408  | -0.655541 |
| H | -4.167254 | 0.863995  | -1.838177 |
| C | -4.128565 | -0.780182 | -0.405730 |
| H | -4.523683 | -0.959967 | 0.603501  |
| H | -4.720443 | -1.404752 | -1.090492 |

Sum of electronic and zero-point Energies= -965.891718  
Sum of electronic and thermal Energies= -965.870712  
Sum of electronic and thermal Enthalpies= -965.869768  
Sum of electronic and thermal Free Energies= -965.941543

daec[n=2]-6-TS (dmf)

|   |           |           |           |
|---|-----------|-----------|-----------|
| C | -3.146817 | -0.286186 | 0.060628  |
| H | -4.229894 | -0.310570 | 0.149578  |
| C | -2.466616 | 0.946283  | 0.189037  |
| C | -1.091299 | 0.900407  | 0.055223  |
| H | -0.499805 | 1.789063  | 0.108474  |
| C | -0.410174 | -0.279957 | -0.133905 |
| H | 0.656052  | -0.217261 | -0.170707 |
| C | -1.044549 | -1.496951 | -0.271801 |
| O | -0.309482 | -2.668948 | -0.489306 |
| C | -2.460247 | -1.501600 | -0.183028 |
| O | -3.067158 | -2.711943 | -0.333542 |
| C | -4.487609 | -2.769420 | -0.246713 |
| H | -4.752275 | -3.819926 | -0.399173 |
| H | -4.964979 | -2.158370 | -1.025729 |
| H | -4.846073 | -2.444948 | 0.740399  |
| C | 3.554428  | -1.775541 | 0.797200  |
| H | 4.500347  | -1.443045 | 1.222409  |
| C | 3.076956  | -1.182125 | -0.385828 |
| C | 3.752633  | 0.042226  | -0.994603 |
| H | 3.425035  | 0.147326  | -2.038209 |
| H | 4.840125  | -0.116733 | -1.020107 |
| C | 3.511733  | 1.411960  | -0.267567 |
| H | 4.116628  | 2.153715  | -0.811188 |
| H | 3.932215  | 1.359794  | 0.747581  |
| C | 1.875467  | -1.672660 | -0.922558 |
| H | 1.490939  | -1.250731 | -1.848356 |
| C | 1.052612  | -2.529200 | -0.171489 |
| C | 1.532652  | -3.113550 | 0.998385  |
| H | 0.896956  | -3.786114 | 1.569538  |
| C | 2.814690  | -2.766659 | 1.448119  |
| H | 3.204853  | -3.225471 | 2.354724  |
| C | 2.042813  | 1.893652  | -0.205964 |
| H | 1.527463  | 1.303292  | 0.557117  |
| H | 1.565486  | 1.655007  | -1.168037 |
| C | 1.791912  | 3.398450  | 0.084127  |
| C | 0.365608  | 3.920174  | -0.297647 |
| C | -0.822067 | 3.825883  | 0.729048  |
| H | -0.881436 | 4.785201  | 1.260235  |
| H | -0.608329 | 3.089309  | 1.513017  |
| H | 0.073952  | 3.416027  | -1.230244 |
| H | 0.467342  | 4.979679  | -0.570965 |
| H | 2.513120  | 3.983642  | -0.506286 |
| H | 2.013195  | 3.625027  | 1.138322  |
| C | -2.226166 | 3.540744  | 0.065773  |
| H | -2.865134 | 4.418828  | 0.228516  |
| H | -2.093144 | 3.474882  | -1.023623 |
| C | -3.074234 | 2.305995  | 0.513118  |
| H | -4.066692 | 2.399587  | 0.048848  |
| H | -3.253168 | 2.368367  | 1.599315  |

Sum of electronic and zero-point Energies= -965.839990  
Sum of electronic and thermal Energies= -965.820132  
Sum of electronic and thermal Enthalpies= -965.819188  
Sum of electronic and thermal Free Energies= -965.886664

daec[n=2]-6-E1 (dmf)

|   |           |           |           |
|---|-----------|-----------|-----------|
| C | -2.082388 | -1.735023 | -0.390152 |
| H | -2.759670 | -1.764247 | -1.239205 |
| C | -2.542135 | -1.208268 | 0.830142  |
| C | -1.673939 | -1.193476 | 1.927727  |
| H | -2.017169 | -0.810535 | 2.886817  |
| C | -0.345095 | -1.602928 | 1.781603  |
| H | 0.350720  | -1.546782 | 2.616252  |
| C | 0.126112  | -2.040277 | 0.548349  |
| O | 1.471579  | -2.353612 | 0.390997  |

|   |           |           |           |
|---|-----------|-----------|-----------|
| C | -0.754604 | -2.155833 | -0.547765 |
| O | -0.220606 | -2.631648 | -1.702752 |
| C | -1.074728 | -2.740013 | -2.840077 |
| H | -0.451104 | -3.148351 | -3.640504 |
| H | -1.464059 | -1.759350 | -3.146742 |
| H | -1.913978 | -3.422783 | -2.648515 |
| C | 4.088174  | 0.896186  | 0.340491  |
| H | 4.777567  | 1.738907  | 0.349439  |
| C | 2.880230  | 0.998518  | -0.369639 |
| C | 2.534437  | 2.270501  | -1.125524 |
| H | 2.207539  | 2.012933  | -2.144205 |
| H | 3.452175  | 2.863137  | -1.235241 |
| C | 1.449090  | 3.172305  | -0.480080 |
| H | 1.505633  | 4.156709  | -0.968978 |
| H | 1.695929  | 3.340015  | 0.579323  |
| C | 2.014446  | -0.106457 | -0.369967 |
| H | 1.089078  | -0.070007 | -0.936549 |
| C | 2.330141  | -1.264001 | 0.350595  |
| C | 3.541425  | -1.366032 | 1.039558  |
| H | 3.774944  | -2.277667 | 1.584332  |
| C | 4.418646  | -0.278482 | 1.023442  |
| H | 5.363276  | -0.345387 | 1.560321  |
| C | 0.015893  | 2.636127  | -0.608246 |
| H | -0.054090 | 1.669535  | -0.094495 |
| H | -0.190666 | 2.432484  | -1.671582 |
| C | -1.073855 | 3.579984  | -0.069512 |
| C | -2.499531 | 3.011509  | -0.239167 |
| C | -2.799800 | 1.818235  | 0.690596  |
| H | -3.086007 | 2.186926  | 1.687834  |
| H | -1.872935 | 1.253691  | 0.840101  |
| H | -2.621275 | 2.696241  | -1.287567 |
| H | -3.238320 | 3.810030  | -0.076393 |
| H | -1.004621 | 4.544278  | -0.595965 |
| H | -0.885820 | 3.797124  | 0.994266  |
| C | -3.870420 | 0.845583  | 0.166451  |
| H | -4.870112 | 1.300499  | 0.230160  |
| H | -3.685432 | 0.656138  | -0.901447 |
| C | -3.892781 | -0.522579 | 0.900439  |
| H | -4.671543 | -1.150523 | 0.444853  |
| H | -4.173744 | -0.374415 | 1.952137  |

Sum of electronic and zero-point Energies= -965.893408  
Sum of electronic and thermal Energies= -965.872439  
Sum of electronic and thermal Enthalpies= -965.871495  
Sum of electronic and thermal Free Energies= -965.943099

daec[n=2]-6-E2 (dmf)

|   |           |           |           |
|---|-----------|-----------|-----------|
| C | -1.655156 | -1.876531 | 0.620362  |
| H | -2.069765 | -1.902659 | 1.623918  |
| C | -2.502785 | -1.565658 | -0.456880 |
| C | -1.972910 | -1.566502 | -1.753225 |
| H | -2.616056 | -1.354486 | -2.605475 |
| C | -0.602482 | -1.769622 | -1.957547 |
| H | -0.172099 | -1.723614 | -2.955737 |
| C | 0.245010  | -1.982270 | -0.875701 |
| O | 1.616179  | -2.092125 | -1.063373 |
| C | -0.285085 | -2.089067 | 0.428885  |
| O | 0.605110  | -2.359549 | 1.417957  |
| C | 0.121708  | -2.416866 | 2.758802  |
| H | 0.994449  | -2.641562 | 3.378476  |
| H | -0.626340 | -3.211965 | 2.882431  |
| H | -0.309903 | -1.456245 | 3.072011  |
| C | 3.924615  | 1.134366  | 0.233550  |
| H | 4.538087  | 1.962279  | 0.585327  |
| C | 2.690925  | 1.400049  | -0.382189 |
| C | 2.214438  | 2.831149  | -0.570171 |
| H | 1.918105  | 2.982008  | -1.619349 |
| H | 3.066806  | 3.499744  | -0.391363 |
| C | 1.040492  | 3.290367  | 0.335019  |
| H | 1.003007  | 4.389473  | 0.291124  |
| H | 1.261961  | 3.031602  | 1.381624  |



|   |           |           |           |
|---|-----------|-----------|-----------|
| C | 1.925712  | 0.311313  | -0.832699 |
| H | 0.984121  | 0.484710  | -1.344098 |
| C | 2.365654  | -1.002087 | -0.638721 |
| C | 3.603293  | -1.258827 | -0.043366 |
| H | 3.932367  | -2.286545 | 0.089232  |
| C | 4.379362  | -0.180276 | 0.385805  |
| H | 5.343361  | -0.368290 | 0.855492  |
| C | -0.332104 | 2.731328  | -0.067267 |
| H | -0.314153 | 1.638330  | 0.019619  |
| H | -0.503329 | 2.950812  | -1.133696 |
| C | -1.517811 | 3.284973  | 0.742670  |
| C | -2.877250 | 2.716687  | 0.279989  |
| C | -3.071216 | 1.226488  | 0.628303  |
| H | -3.419083 | 1.130009  | 1.668520  |
| H | -2.093465 | 0.733893  | 0.597518  |
| H | -2.950640 | 2.848497  | -0.811100 |
| H | -3.694140 | 3.313336  | 0.711913  |
| H | -1.534811 | 4.381749  | 0.649882  |
| H | -1.370830 | 3.069842  | 1.813320  |
| C | -4.018129 | 0.461156  | -0.312075 |
| H | -5.061740 | 0.763378  | -0.138564 |
| H | -3.785437 | 0.736961  | -1.351467 |
| C | -3.916241 | -1.084007 | -0.191853 |
| H | -4.616844 | -1.535897 | -0.907956 |
| H | -4.234200 | -1.398955 | 0.811582  |

Sum of electronic and zero-point Energies= -965.893848  
Sum of electronic and thermal Energies= -965.872898  
Sum of electronic and thermal Enthalpies= -965.871954  
Sum of electronic and thermal Free Energies= -965.943342

#### daec[n=2]-7-TS (dmf)

|   |           |           |           |
|---|-----------|-----------|-----------|
| C | 0.508573  | 3.118011  | -0.187585 |
| H | 0.714023  | 4.182305  | -0.296488 |
| C | 1.547346  | 2.166811  | -0.215180 |
| C | 1.154845  | 0.847772  | -0.049470 |
| H | 1.876413  | 0.059164  | -0.020478 |
| C | -0.160827 | 0.468281  | 0.067783  |
| H | -0.346547 | -0.584375 | 0.122734  |
| C | -1.198380 | 1.387478  | 0.098562  |
| O | -2.528630 | 0.972151  | 0.230692  |
| C | -0.846897 | 2.752819  | -0.021602 |
| O | -1.789982 | 3.751554  | -0.054195 |
| C | -2.549997 | 3.919567  | 1.149253  |
| H | -3.215221 | 4.771270  | 0.973550  |
| H | -1.890187 | 4.144652  | 1.999960  |
| H | -3.150187 | 3.030677  | 1.377785  |
| C | -2.406102 | -3.006584 | 0.946274  |
| H | -2.224549 | -4.002831 | -1.346526 |
| C | -1.838235 | -2.643240 | 0.286332  |
| C | -0.823610 | -3.539530 | 0.991468  |
| H | -0.690995 | -4.453653 | 0.396860  |
| H | -1.234848 | -3.861596 | 1.960392  |
| C | 0.572717  | -2.907456 | 1.297688  |
| H | 1.081011  | -3.601058 | 1.984356  |
| H | 0.417082  | -1.986769 | 1.878421  |
| C | -2.123809 | -1.359754 | 0.782184  |
| H | -1.710925 | -1.043627 | 1.737299  |
| C | -2.701012 | -0.394827 | -0.053768 |
| C | -3.270023 | -0.759314 | -1.273077 |
| H | -3.727983 | -0.003773 | -1.907037 |
| C | -3.166570 | -2.093267 | -1.685196 |
| H | -3.608734 | -2.397968 | -2.631833 |
| C | 1.552456  | -2.596973 | 0.133888  |
| H | 1.081192  | -1.933555 | -0.602824 |
| H | 1.784926  | -3.526276 | -0.408657 |
| C | 2.876092  | -1.981371 | 0.674235  |
| C | 3.955543  | -1.465026 | -0.330280 |
| C | 3.863376  | -0.061349 | -1.010946 |
| H | 2.982007  | -0.012911 | -1.661523 |
| H | 4.719559  | -0.007672 | -1.698881 |

|   |          |           |           |
|---|----------|-----------|-----------|
| H | 4.060415 | -2.208831 | -1.135128 |
| H | 4.912663 | -1.487153 | 0.213017  |
| H | 3.365996 | -2.764837 | 1.272051  |
| H | 2.636098 | -1.189517 | 1.398471  |
| C | 3.928736 | 1.184542  | -0.062969 |
| H | 4.969146 | 1.534507  | -0.028996 |
| H | 3.688865 | 0.884180  | 0.967026  |
| C | 3.037792 | 2.412804  | -0.422760 |
| H | 3.366940 | 3.271006  | 0.181004  |
| H | 3.220645 | 2.702626  | -1.470247 |

Sum of electronic and zero-point Energies= -965.841033  
Sum of electronic and thermal Energies= -965.821256  
Sum of electronic and thermal Enthalpies= -965.820311  
Sum of electronic and thermal Free Energies= -965.887622

#### daec[n=2]-7-E1 (dmf)

|   |           |           |           |
|---|-----------|-----------|-----------|
| C | -1.347441 | 2.051226  | 0.633995  |
| H | -1.753435 | 2.188564  | 1.634284  |
| C | -2.200759 | 1.833193  | -0.457496 |
| C | -1.628022 | 1.707437  | -1.732894 |
| H | -2.269266 | 1.568835  | -2.601774 |
| C | -0.240579 | 1.697243  | -1.896736 |
| H | 0.207384  | 1.546833  | -2.876720 |
| C | 0.594013  | 1.819222  | -0.786550 |
| O | 1.967904  | 1.686634  | -0.933265 |
| C | 0.042571  | 2.044942  | 0.487291  |
| O | 0.828331  | 2.157095  | 1.605389  |
| C | 1.644056  | 3.335971  | 1.666147  |
| H | 2.196463  | 3.275467  | 2.609102  |
| H | 1.018630  | 4.240193  | 1.668311  |
| H | 2.351908  | 3.382893  | 0.830308  |
| C | 3.712156  | -1.902951 | 0.276547  |
| H | 4.189159  | -2.829129 | 0.594303  |
| C | 2.345266  | -1.905334 | -0.054897 |
| C | 1.568143  | -3.215216 | 0.022693  |
| H | 1.591552  | -3.572059 | 1.064678  |
| H | 2.138315  | -3.964814 | -0.545849 |
| C | 0.111163  | -3.232563 | -0.478928 |
| H | -0.154313 | -4.281291 | -0.678250 |
| H | 0.047982  | -2.721455 | -1.451492 |
| C | 1.758738  | -0.701623 | -0.464076 |
| H | 0.711371  | -0.672848 | -0.740513 |
| C | 2.513910  | 0.477830  | -0.524459 |
| C | 3.873122  | 0.473189  | -0.208069 |
| H | 4.445874  | 1.395282  | -0.270332 |
| C | 4.463972  | -0.729483 | 0.191627  |
| H | 5.522868  | -0.745107 | 0.443975  |
| C | -0.939777 | -2.651608 | 0.484146  |
| H | -0.697004 | -1.608225 | 0.725658  |
| H | -0.892732 | -3.202628 | 1.437096  |
| C | -2.367537 | -2.744065 | -0.083194 |
| C | -3.471990 | -2.188873 | 0.839541  |
| C | -3.484904 | -0.655103 | 0.995868  |
| H | -2.466721 | -0.311527 | 1.220547  |
| H | -4.091609 | -0.385114 | 1.873430  |
| H | -3.361666 | -2.648830 | 1.833689  |
| H | -4.452237 | -2.518799 | 0.461412  |
| H | -2.588936 | -3.801331 | -0.296458 |
| H | -2.402966 | -2.229950 | -1.056085 |
| C | -4.031868 | 0.099415  | -0.229385 |
| H | -5.125718 | -0.012952 | -0.263855 |
| H | -3.647895 | -0.353345 | -1.154648 |
| C | -3.684927 | 1.611131  | -0.255756 |
| H | -4.247943 | 2.085802  | -1.071147 |
| H | -4.014783 | 2.081817  | 0.680837  |

Sum of electronic and zero-point Energies= -965.892013  
Sum of electronic and thermal Energies= -965.870899  
Sum of electronic and thermal Enthalpies= -965.869955  
Sum of electronic and thermal Free Energies= -965.941958

## daec[n=2]-7-E2 (dmf)

|   |           |           |           |
|---|-----------|-----------|-----------|
| C | -1.574629 | 1.903396  | -0.624172 |
| H | -2.094646 | 1.930650  | -1.577691 |
| C | -2.311897 | 1.647539  | 0.546804  |
| C | -1.647081 | 1.642502  | 1.777820  |
| H | -2.204565 | 1.471235  | 2.696427  |
| C | -0.256514 | 1.796817  | 1.829441  |
| H | 0.278733  | 1.741454  | 2.775034  |
| C | 0.472434  | 1.972634  | 0.660503  |
| O | 1.857661  | 2.032557  | 0.711956  |
| C | -0.185656 | 2.070260  | -0.584580 |
| O | 0.607246  | 2.281292  | -1.665976 |
| C | -0.010696 | 2.322663  | -2.951350 |
| H | 0.800746  | 2.493055  | -3.664565 |
| H | -0.735860 | 3.144912  | -3.022382 |
| H | -0.510088 | 1.372871  | -3.187254 |
| C | 4.040967  | -1.482525 | 0.201816  |
| H | 4.635209  | -2.386191 | 0.074471  |
| C | 2.646177  | -1.540469 | 0.043516  |
| C | 1.984029  | -2.873358 | -0.286948 |
| H | 1.924889  | -3.475461 | 0.634551  |
| H | 2.672358  | -3.424275 | -0.942659 |
| C | 0.588083  | -2.839284 | -0.949265 |
| H | 0.479759  | -3.755002 | -1.548802 |
| H | 0.542237  | -2.005839 | -1.666263 |
| C | 1.907769  | -0.360135 | 0.203970  |
| H | 0.832196  | -0.375546 | 0.080510  |
| C | 2.543031  | 0.847202  | 0.522499  |
| C | 3.931786  | 0.899267  | 0.676565  |
| H | 4.410227  | 1.844584  | 0.921474  |
| C | 4.671164  | -0.274260 | 0.513464  |
| H | 5.753299  | -0.242401 | 0.628933  |
| C | -0.611440 | -2.763821 | 0.013650  |
| H | -0.526799 | -1.880871 | 0.661168  |
| H | -0.581238 | -3.634914 | 0.687575  |
| C | -1.959903 | -2.744770 | -0.727441 |
| C | -3.200500 | -2.648763 | 0.184732  |
| C | -3.414166 | -1.276766 | 0.855578  |
| H | -2.469896 | -0.948369 | 1.309806  |
| H | -4.123673 | -1.387622 | 1.689486  |
| H | -3.122836 | -3.421511 | 0.965029  |
| H | -4.096490 | -2.902545 | -0.402984 |
| H | -2.037862 | -3.661680 | -1.331929 |
| H | -1.963575 | -1.911683 | -1.447079 |
| C | -3.939884 | -0.186450 | -0.095758 |
| H | -5.005529 | -0.367455 | -0.300583 |
| H | -3.426723 | -0.253646 | -1.065513 |
| C | -3.772529 | 1.259799  | 0.437372  |
| H | -4.295651 | 1.946092  | -0.243449 |
| H | -4.256751 | 1.350501  | 1.419564  |

Sum of electronic and zero-point Energies= -965.895196  
 Sum of electronic and thermal Energies= -965.874294  
 Sum of electronic and thermal Enthalpies= -965.873350  
 Sum of electronic and thermal Free Energies= -965.944833

## daec[n=3]-1-TS (dmf)

|   |           |           |           |
|---|-----------|-----------|-----------|
| C | 2.978976  | 1.318008  | 0.036313  |
| H | 3.976619  | 1.675079  | -0.205369 |
| C | 2.759833  | -0.067374 | 0.174208  |
| C | 1.466028  | -0.470924 | 0.476954  |
| H | 1.223971  | -1.509702 | 0.606944  |
| C | 0.422851  | 0.431225  | 0.594710  |
| H | -0.552875 | 0.020878  | 0.786657  |
| C | 0.616334  | 1.795577  | 0.434032  |
| O | -0.422041 | 2.725405  | 0.502053  |
| C | 1.931323  | 2.252996  | 0.169372  |
| O | 2.078280  | 3.599756  | 0.032229  |
| C | 3.378475  | 4.109101  | -0.248671 |
| H | 3.265185  | 5.195692  | -0.306829 |
| H | 4.091129  | 3.861097  | 0.550536  |

|   |           |           |           |
|---|-----------|-----------|-----------|
| H | 3.762459  | 3.733090  | -1.207623 |
| C | -3.990261 | 0.931829  | -0.700742 |
| H | -4.852059 | 0.393631  | -1.091962 |
| C | -3.373994 | 0.501433  | 0.487159  |
| C | -3.718285 | -0.818142 | 1.160553  |
| H | -4.765914 | -0.822616 | 1.496950  |
| H | -3.101982 | -0.922710 | 2.063127  |
| C | -3.535872 | -2.059816 | 0.237599  |
| H | -4.317450 | -2.000617 | -0.533064 |
| H | -3.776259 | -2.953711 | 0.832758  |
| C | -2.293756 | 1.248933  | 0.972860  |
| H | -1.847424 | 0.980380  | 1.925835  |
| C | -1.685542 | 2.228463  | 0.178325  |
| C | -2.294827 | 2.651447  | -1.002706 |
| H | -1.827462 | 3.425539  | -1.606606 |
| C | -3.481143 | 2.025640  | -1.408077 |
| H | -3.972768 | 2.354420  | -2.321884 |
| C | -2.188115 | -2.278257 | -0.501394 |
| H | -1.813153 | -1.314759 | -0.875397 |
| H | -2.422330 | -2.866107 | -1.402126 |
| C | -1.038608 | -3.020883 | 0.223164  |
| C | 0.081691  | -3.387729 | -0.784548 |
| C | 1.319651  | -4.183616 | -0.282645 |
| H | 0.983308  | -4.939707 | 0.443665  |
| H | 1.702458  | -4.754491 | -1.142638 |
| C | 2.532121  | -3.432295 | 0.332174  |
| H | 2.236612  | -2.925697 | 1.258270  |
| H | 3.248074  | -4.201039 | 0.657983  |
| H | -0.393766 | -4.001896 | -1.564433 |
| H | 0.410727  | -2.475351 | -1.302034 |
| H | -1.429307 | -3.946800 | 0.674149  |
| H | -0.648348 | -2.417647 | 1.055473  |
| C | 3.271448  | -2.457557 | -0.636545 |
| H | 2.611737  | -2.191436 | -1.473689 |
| H | 4.113727  | -3.000658 | -1.086773 |
| C | 3.825929  | -1.135067 | -0.032962 |
| H | 4.335553  | -1.354471 | 0.919569  |
| H | 4.604073  | -0.739642 | -0.700548 |

Sum of electronic and zero-point Energies= -1005.142064  
 Sum of electronic and thermal Energies= -1005.120940  
 Sum of electronic and thermal Enthalpies= -1005.119995  
 Sum of electronic and thermal Free Energies= -1005.190500

## daec[n=3]-1-E1 (dmf)

|   |           |           |           |
|---|-----------|-----------|-----------|
| C | 1.727233  | -1.784197 | 0.689627  |
| H | 2.228566  | -1.627720 | 1.640507  |
| C | 2.477931  | -1.709153 | -0.499017 |
| C | 1.836750  | -1.943844 | -1.719130 |
| H | 2.403989  | -1.906476 | -2.647036 |
| C | 0.456326  | -2.183328 | -1.760165 |
| H | -0.058847 | -2.332333 | -2.706761 |
| C | -0.286923 | -2.191951 | -0.587734 |
| O | -1.659907 | -2.381558 | -0.628670 |
| C | 0.349943  | -2.021330 | 0.662329  |
| O | -0.453818 | -2.082141 | 1.754741  |
| C | 0.139198  | -1.876848 | 3.035884  |
| H | -0.677550 | -1.965746 | 3.757817  |
| H | 0.900736  | -2.638426 | 3.252754  |
| H | 0.588270  | -0.877200 | 3.114736  |
| C | -4.172982 | 0.924223  | -0.220953 |
| H | -4.851645 | 1.769998  | -0.121739 |
| C | -2.842525 | 1.142156  | -0.611972 |
| C | -2.332581 | 2.542191  | -0.896109 |
| H | -3.153883 | 3.134722  | -1.322210 |
| H | -1.549553 | 2.496757  | -1.664675 |
| C | -1.795518 | 3.303734  | 0.340663  |
| H | -2.576815 | 3.306428  | 1.115259  |
| H | -1.651028 | 4.354768  | 0.047313  |
| C | -1.988922 | 0.036489  | -0.743009 |
| H | -0.962316 | 0.189744  | -1.062687 |

|   |           |           |           |
|---|-----------|-----------|-----------|
| C | -2.453317 | -1.258201 | -0.483954 |
| C | -3.782644 | -1.472010 | -0.105002 |
| H | -4.128582 | -2.485426 | 0.084301  |
| C | -4.634652 | -0.373256 | 0.024020  |
| H | -5.670664 | -0.533583 | 0.317762  |
| C | -0.483912 | 2.783534  | 0.955826  |
| H | -0.612040 | 1.742984  | 1.290831  |
| H | -0.288745 | 3.370957  | 1.866630  |
| C | 0.747768  | 2.875005  | 0.038190  |
| C | 2.073615  | 2.656522  | 0.788447  |
| C | 3.315347  | 2.592218  | -0.126084 |
| H | 3.240677  | 3.391638  | -0.879069 |
| H | 4.216460  | 2.818200  | 0.464662  |
| C | 3.511698  | 1.235374  | -0.832588 |
| H | 2.545803  | 0.893389  | -1.230324 |
| H | 4.167935  | 1.363270  | -1.706467 |
| H | 2.199482  | 3.474410  | 1.514059  |
| H | 2.006989  | 1.734027  | 1.385974  |
| H | 0.773104  | 3.866946  | -0.441424 |
| H | 0.657393  | 2.145062  | -0.779056 |
| C | 4.110597  | 0.152970  | 0.083536  |
| H | 3.656755  | 0.219201  | 1.082383  |
| H | 5.183402  | 0.351578  | 0.224565  |
| C | 3.935136  | -1.294388 | -0.434235 |
| H | 4.387851  | -1.391216 | -1.430689 |
| H | 4.488669  | -1.971824 | 0.232602  |

Sum of electronic and zero-point Energies= -1005.182739  
Sum of electronic and thermal Energies= -1005.160621  
Sum of electronic and thermal Enthalpies= -1005.159677  
Sum of electronic and thermal Free Energies= -1005.233598

#### daec[n=3]-1-E2 (dmf)

|   |           |           |           |
|---|-----------|-----------|-----------|
| C | 1.739931  | -2.095573 | -0.501924 |
| H | 2.254240  | -2.281464 | -1.440360 |
| C | 2.473264  | -1.594159 | 0.585852  |
| C | 1.814954  | -1.374575 | 1.803607  |
| H | 2.370300  | -1.010094 | 2.665646  |
| C | 0.437623  | -1.582278 | 1.907507  |
| H | -0.091749 | -1.382941 | 2.836929  |
| C | -0.291218 | -2.025642 | 0.808752  |
| O | -1.664896 | -2.186912 | 0.918223  |
| C | 0.358802  | -2.322295 | -0.405873 |
| O | -0.428310 | -2.778795 | -1.413480 |
| C | 0.186776  | -3.061389 | -2.669561 |
| H | -0.617156 | -3.419792 | -3.318724 |
| H | 0.635167  | -2.160013 | -3.109514 |
| H | 0.953398  | -3.842535 | -2.574431 |
| C | -4.203999 | 0.963788  | -0.096010 |
| H | -4.889215 | 1.769965  | -0.353262 |
| C | -2.847429 | 1.068386  | -0.439070 |
| C | -2.319213 | 2.292964  | -1.161884 |
| H | -3.129899 | 2.715519  | -1.770926 |
| H | -1.528562 | 1.991797  | -1.862136 |
| C | -1.786744 | 3.418203  | -0.240179 |
| H | -2.570704 | 3.672367  | 0.488703  |
| H | -1.643019 | 4.315602  | -0.861157 |
| C | -1.982743 | 0.014470  | -0.104697 |
| H | -0.933155 | 0.083178  | -0.373436 |
| C | -2.464169 | -1.120130 | 0.558103  |
| C | -3.820417 | -1.224078 | 0.889438  |
| H | -4.178517 | -2.115337 | 1.399359  |
| C | -4.681295 | -0.176382 | 0.559564  |
| H | -5.736830 | -0.253312 | 0.814951  |
| C | -0.475291 | 3.132287  | 0.513849  |
| H | -0.600271 | 2.257801  | 1.170039  |
| H | -0.283780 | 3.985665  | 1.183046  |
| C | 0.756715  | 2.924204  | -0.383627 |
| C | 2.082706  | 2.937131  | 0.397175  |
| C | 3.319891  | 2.592432  | -0.458871 |
| H | 3.245022  | 3.127479  | -1.417888 |

|   |          |           |           |
|---|----------|-----------|-----------|
| H | 4.225400 | 2.980387  | 0.032558  |
| C | 3.504081 | 1.083800  | -0.722299 |
| H | 2.529931 | 0.641802  | -0.974482 |
| H | 4.139511 | 0.935334  | -1.608168 |
| H | 2.214567 | 3.935617  | 0.840956  |
| H | 2.014318 | 2.238256  | 1.245327  |
| H | 0.789289 | 3.717945  | -1.147569 |
| H | 0.659317 | 1.977508  | -0.934352 |
| C | 4.127498 | 0.329511  | 0.466091  |
| H | 3.705573 | 0.705327  | 1.409047  |
| H | 5.204955 | 0.548085  | 0.506497  |
| C | 3.930179 | -1.205318 | 0.426819  |
| H | 4.323481 | -1.607143 | -0.517129 |
| H | 4.524621 | -1.653495 | 1.235960  |

Sum of electronic and zero-point Energies= -1005.182321  
Sum of electronic and thermal Energies= -1005.160157  
Sum of electronic and thermal Enthalpies= -1005.159213  
Sum of electronic and thermal Free Energies= -1005.233478

#### daec[n=3]-2-TS (dmf)

|   |           |           |           |
|---|-----------|-----------|-----------|
| C | 2.377502  | 2.145146  | -0.084380 |
| H | 3.230523  | 2.798051  | 0.081224  |
| C | 2.567938  | 0.748179  | -0.069687 |
| C | 1.446134  | -0.042547 | -0.280869 |
| H | 1.519392  | -1.114095 | -0.281426 |
| C | 0.187284  | 0.504527  | -0.468304 |
| H | -0.636023 | -0.175642 | -0.602982 |
| C | -0.021642 | 1.874681  | -0.443706 |
| O | -1.293822 | 2.436962  | -0.560419 |
| C | 1.102607  | 2.718939  | -0.268545 |
| O | 0.850712  | 4.056975  | -0.267281 |
| C | 1.948862  | 4.946537  | -0.089482 |
| H | 2.694170  | 4.833160  | -0.889372 |
| H | 2.436028  | 4.798679  | 0.884706  |
| H | 1.524787  | 5.954127  | -0.131467 |
| C | -4.020740 | -0.260274 | 1.064142  |
| H | -4.634514 | -1.015420 | 1.552742  |
| C | -3.474399 | -0.527278 | -0.200911 |
| C | -3.591363 | -1.900574 | -0.847049 |
| H | -4.155455 | -1.823755 | -1.788999 |
| H | -4.178258 | -2.553570 | -0.186815 |
| C | -2.228800 | -2.575779 | -1.174893 |
| H | -1.691349 | -1.942807 | -1.896377 |
| H | -2.442043 | -3.515996 | -1.704985 |
| C | -2.704198 | 0.476654  | -0.810017 |
| H | -2.292011 | 0.318542  | -1.803443 |
| C | -2.320009 | 1.611594  | -0.088890 |
| C | -2.873794 | 1.878789  | 1.164557  |
| H | -2.578883 | 2.774603  | 1.705797  |
| C | -3.761684 | 0.950455  | 1.717030  |
| H | -4.203719 | 1.144770  | 2.692514  |
| C | -1.297672 | -2.864279 | 0.021604  |
| H | -1.761597 | -3.616413 | 0.678837  |
| H | -1.196927 | -1.954813 | 0.630848  |
| C | 0.115654  | -3.336602 | -0.396443 |
| C | 1.117156  | -3.412014 | 0.779203  |
| C | 2.601589  | -3.677698 | 0.410844  |
| H | 2.639470  | -4.524576 | -0.291830 |
| H | 3.114885  | -4.024779 | 1.321089  |
| C | 3.439553  | -2.516860 | -0.189013 |
| H | 4.388114  | -2.946401 | -0.543160 |
| H | 2.952532  | -2.134670 | -1.094642 |
| H | 0.791988  | -4.219797 | 1.452381  |
| H | 1.045173  | -2.491300 | 1.376419  |
| H | 0.495394  | -2.656437 | -1.172672 |
| H | 0.048911  | -4.324969 | -0.877557 |
| C | 3.771077  | -1.360460 | 0.800695  |
| H | 4.716533  | -1.606112 | 1.303706  |
| H | 3.015199  | -1.320514 | 1.597338  |
| C | 3.904635  | 0.066082  | 0.196940  |

H 4.495879 0.015397 -0.732149  
H 4.492544 0.689941 0.884909  
Sum of electronic and zero-point Energies= -1005.151700  
Sum of electronic and thermal Energies= -1005.130725  
Sum of electronic and thermal Enthalpies= -1005.129781  
Sum of electronic and thermal Free Energies= -1005.199696

daec[n=3]-2-E1 (dmf)

C 1.630472 2.031773 -0.531857  
H 2.238502 2.183398 -1.418914  
C 2.265076 1.703095 0.677210  
C 1.479843 1.522548 1.824738  
H 1.952914 1.284003 2.775509  
C 0.090306 1.643073 1.756816  
H -0.527260 1.503904 2.641767  
C -0.533288 1.945799 0.549275  
O -1.910464 2.106174 0.499873  
C 0.233971 2.154776 -0.614038  
O -0.455644 2.454488 -1.744888  
C 0.284211 2.656054 -2.947827  
H 0.844504 1.754335 -3.231230  
H 0.977390 3.503637 -2.856688  
H -0.459190 2.877750 -3.718807  
C -4.422285 -1.212369 0.358036  
H -5.098928 -2.065414 0.331147  
C -3.083334 -1.378276 -0.037421  
C -2.622763 -2.751374 -0.515909  
H -3.322163 -3.076794 -1.300197  
H -2.760507 -3.472080 0.305820  
C -1.187766 -2.870117 -1.056879  
H -0.994137 -2.045518 -1.759328  
H -1.125428 -3.789797 -1.656378  
C -2.232245 -0.265221 0.003949  
H -1.195836 -0.354500 -0.301423  
C -2.706054 0.979462 0.439509  
C -4.040775 1.140882 0.820380  
H -4.389936 2.115853 1.151821  
C -4.892943 0.034636 0.774207  
H -5.933840 0.149719 1.071872  
C -0.081776 -2.909681 0.012771  
H -0.152359 -3.857335 0.569676  
H -0.240130 -2.112128 0.752882  
C 1.322311 -2.753656 -0.588624  
C 2.457722 -2.779623 0.447618  
C 3.823720 -2.343479 -0.121306  
H 4.008060 -2.891302 -1.058203  
H 4.623869 -2.648593 0.570634  
C 3.937015 -0.827880 -0.383212  
H 4.764487 -0.633911 -1.081711  
H 3.028426 -0.482562 -0.895551  
H 2.542445 -3.795306 0.862677  
H 2.189818 -2.129474 1.294702  
H 1.351553 -1.804252 -1.143740  
H 1.495749 -3.544527 -1.336023  
C 4.160249 0.007394 0.890700  
H 5.218990 -0.054759 1.182306  
H 3.589166 -0.418631 1.727678  
C 3.766963 1.497172 0.745405  
H 4.244354 1.919966 -0.149528  
H 4.166553 2.049107 1.608103  
Sum of electronic and zero-point Energies= -1005.181123  
Sum of electronic and thermal Energies= -1005.158870  
Sum of electronic and thermal Enthalpies= -1005.157926  
Sum of electronic and thermal Free Energies= -1005.232961

daec[n=3]-2-E2 (dmf)

C 1.445519 1.964334 0.597265  
H 1.900339 2.039590 1.580919  
C 2.278071 1.811078 -0.528043  
C 1.690535 1.742589 -1.795064

H 2.315845 1.638287 -2.679494  
C 0.296179 1.790379 -1.935257  
H -0.170117 1.724826 -2.915953  
C -0.519150 1.912403 -0.817582  
O -1.893830 2.001953 -0.968454  
C 0.054412 2.020494 0.470884  
O -0.816535 2.172688 1.501199  
C -0.285875 2.250860 2.823144  
H 0.370196 3.124116 2.941298  
H 0.267000 1.339078 3.087837  
H -1.151060 2.355681 3.483869  
C -4.347313 -1.150403 0.211592  
H -5.008753 -1.959649 0.518115  
C -3.009530 -1.435820 -0.114037  
C -2.528599 -2.882012 -0.052686  
H -3.211670 -3.482162 -0.672178  
H -2.672870 -3.254721 0.973814  
C -1.083957 -3.168149 -0.496411  
H -0.891324 -2.665383 -1.456062  
H -0.999016 -4.244467 -0.704753  
C -2.179693 -0.377484 -0.508360  
H -1.145942 -0.559829 -0.780617  
C -2.671497 0.932894 -0.562517  
C -4.004540 1.209055 -0.252099  
H -4.367890 2.232394 -0.306569  
C -4.836960 0.155051 0.134254  
H -5.877238 0.359298 0.382120  
C 0.004829 -2.779939 0.519830  
H -0.056292 -3.454032 1.388769  
H -0.182296 -1.768611 0.908634  
C 1.416348 -2.822977 -0.083028  
C 2.532597 -2.445341 0.904551  
C 3.901493 -2.212147 0.232352  
H 4.110909 -3.054135 -0.445182  
H 4.693853 -2.233868 0.996436  
C 3.996688 -0.887421 -0.551660  
H 4.834094 -0.938090 -1.263288  
H 3.092692 -0.765255 -1.164335  
H 2.627361 -3.239906 1.660023  
H 2.236454 -1.539662 1.456083  
H 1.440139 -2.140626 -0.945811  
H 1.616311 -3.827786 -0.488604  
C 4.183146 0.351038 0.343634  
H 5.235636 0.416474 0.656343  
H 3.598968 0.240198 1.268111  
C 3.777028 1.683154 -0.330373  
H 4.285856 1.777416 -1.299763  
H 4.133341 2.513883 0.295943  
Sum of electronic and zero-point Energies= -1005.181973  
Sum of electronic and thermal Energies= -1005.159792  
Sum of electronic and thermal Enthalpies= -1005.158848  
Sum of electronic and thermal Free Energies= -1005.233041

daec[n=3]-3-TS (dmf)

C -3.159345 -1.085497 -0.017471  
H -4.194039 -1.400268 0.090327  
C -2.855705 0.292538 -0.047348  
C -1.520985 0.636602 -0.192664  
H -1.227725 1.664625 -0.270159  
C -0.511032 -0.313715 -0.244112  
H 0.503844 0.045016 -0.291590  
C -0.796041 -1.669884 -0.229596  
O 0.176150 -2.661521 -0.306912  
C -2.155378 -2.065829 -0.126484  
O -2.383422 -3.408549 -0.125846  
C -3.729411 -3.860132 -0.012442  
H -4.184992 -3.540383 0.935475  
H -3.679162 -4.952682 -0.038084  
H -4.346701 -3.505562 -0.850018  
C 4.020893 -1.272139 0.541250

|   |           |           |           |
|---|-----------|-----------|-----------|
| H | 4.984733  | -0.859396 | 0.834743  |
| C | 3.322994  | -0.716957 | -0.545878 |
| C | 3.781266  | 0.554860  | -1.241513 |
| H | 3.103521  | 0.763129  | -2.079733 |
| H | 4.780753  | 0.411610  | -1.678700 |
| C | 3.869484  | 1.795811  | -0.306992 |
| H | 4.208485  | 2.645934  | -0.918384 |
| H | 4.676827  | 1.608170  | 0.415523  |
| C | 2.104022  | -1.300764 | -0.913073 |
| H | 1.575823  | -0.923668 | -1.784014 |
| C | 1.495629  | -2.265314 | -0.099121 |
| C | 2.188972  | -2.811546 | 0.980605  |
| H | 1.716599  | -3.572482 | 1.597143  |
| C | 3.474245  | -2.333950 | 1.267495  |
| H | 4.028331  | -2.761319 | 2.101226  |
| C | 2.617530  | 2.213809  | 0.500634  |
| H | 2.960846  | 2.898387  | 1.291802  |
| H | 2.216499  | 1.334871  | 1.027366  |
| C | 1.467845  | 2.908768  | -0.257658 |
| C | 0.314442  | 3.322905  | 0.687948  |
| C | -0.965428 | 3.856438  | -0.021157 |
| H | -0.980009 | 3.480403  | -1.054074 |
| H | -0.890713 | 4.947716  | -0.123212 |
| C | -2.324912 | 3.491834  | 0.673424  |
| H | -2.751808 | 4.404782  | 1.108260  |
| H | -2.126640 | 2.832631  | 1.529446  |
| H | 0.684344  | 4.073776  | 1.402152  |
| H | 0.049482  | 2.447369  | 1.297155  |
| H | 1.068900  | 2.237632  | -1.033119 |
| H | 1.854931  | 3.793148  | -0.788166 |
| C | -3.411929 | 2.830445  | -0.244448 |
| H | -3.060043 | 2.828874  | -1.286291 |
| H | -4.309008 | 3.463720  | -0.239178 |
| C | -3.890149 | 1.397008  | 0.116215  |
| H | -4.774402 | 1.167378  | -0.497036 |
| H | -4.252553 | 1.395408  | 1.157513  |

Sum of electronic and zero-point Energies= -1005.144863  
Sum of electronic and thermal Energies= -1005.123712  
Sum of electronic and thermal Enthalpies= -1005.122768  
Sum of electronic and thermal Free Energies= -1005.193259

daec[n=3]-3-E1 (dmf)

|   |           |           |           |
|---|-----------|-----------|-----------|
| C | -2.314868 | -1.610707 | -0.443579 |
| H | -2.920648 | -1.793710 | -1.326716 |
| C | -2.880261 | -0.907786 | 0.636273  |
| C | -2.102467 | -0.692904 | 1.780680  |
| H | -2.528668 | -0.175339 | 2.637411  |
| C | -0.778647 | -1.142471 | 1.834272  |
| H | -0.169273 | -0.981694 | 2.721233  |
| C | -0.219531 | -1.815225 | 0.753956  |
| O | 1.068706  | -2.321792 | 0.846741  |
| C | -0.989956 | -2.067260 | -0.402308 |
| O | -0.368177 | -2.746860 | -1.399846 |
| C | -1.109003 | -3.018744 | -2.588417 |
| H | -1.989558 | -3.641624 | -2.379210 |
| H | -0.425789 | -3.565955 | -3.244145 |
| H | -1.426531 | -2.091681 | -3.085309 |
| C | 4.412170  | 0.036174  | 0.047263  |
| H | 5.303203  | 0.628183  | -0.155853 |
| C | 3.169464  | 0.462006  | -0.446081 |
| C | 3.056786  | 1.738916  | -1.258476 |
| H | 2.270750  | 1.619459  | -2.015225 |
| H | 3.995724  | 1.888785  | -1.808730 |
| C | 2.786359  | 3.023581  | -0.434478 |
| H | 2.830910  | 3.876946  | -1.128358 |
| H | 3.612629  | 3.163376  | 0.278360  |
| C | 2.033275  | -0.321325 | -0.181345 |
| H | 1.065517  | -0.014025 | -0.566793 |
| C | 2.140542  | -1.500629 | 0.562882  |
| C | 3.384640  | -1.924937 | 1.045147  |

|   |           |           |           |
|---|-----------|-----------|-----------|
| H | 3.448339  | -2.847917 | 1.616576  |
| C | 4.514616  | -1.149908 | 0.781713  |
| H | 5.484442  | -1.476408 | 1.153269  |
| C | 1.454690  | 3.065669  | 0.334993  |
| H | 1.417292  | 4.001740  | 0.913493  |
| H | 1.437409  | 2.252360  | 1.075891  |
| C | 0.199184  | 2.957564  | -0.543163 |
| C | -1.116265 | 2.921539  | 0.257386  |
| C | -2.251339 | 2.230001  | -0.510372 |
| H | -1.905723 | 1.222898  | -0.779411 |
| H | -2.430531 | 2.747581  | -1.466235 |
| C | -3.581190 | 2.117677  | 0.261136  |
| H | -4.129131 | 3.067045  | 0.175422  |
| H | -3.375906 | 1.988847  | 1.334638  |
| H | -1.411418 | 3.939913  | 0.554751  |
| H | -0.951234 | 2.366800  | 1.194215  |
| H | 0.260053  | 2.038765  | -1.142827 |
| H | 0.177040  | 3.786409  | -1.268112 |
| C | -4.475360 | 0.954699  | -0.225731 |
| H | -4.295845 | 0.778076  | -1.296768 |
| H | -5.535095 | 1.233171  | -0.138182 |
| C | -4.298273 | -0.374372 | 0.555049  |
| H | -4.948932 | -1.130761 | 0.093262  |
| H | -4.670655 | -0.221396 | 1.577397  |

Sum of electronic and zero-point Energies= -1005.179710  
Sum of electronic and thermal Energies= -1005.157454  
Sum of electronic and thermal Enthalpies= -1005.156510  
Sum of electronic and thermal Free Energies= -1005.231126

daec[n=3]-3-E2 (dmf)

|   |           |           |           |
|---|-----------|-----------|-----------|
| C | -2.105652 | -1.327552 | 0.732270  |
| H | -2.549992 | -1.121912 | 1.701606  |
| C | -2.897404 | -1.188654 | -0.421907 |
| C | -2.331615 | -1.495004 | -1.666204 |
| H | -2.930456 | -1.414618 | -2.571643 |
| C | -0.992484 | -1.893561 | -1.757765 |
| H | -0.543616 | -2.131957 | -2.719752 |
| C | -0.207197 | -1.997529 | -0.614057 |
| O | 1.096479  | -2.460337 | -0.704984 |
| C | -0.765570 | -1.726833 | 0.654443  |
| O | 0.062140  | -1.885890 | 1.719003  |
| C | -0.463027 | -1.638268 | 3.022178  |
| H | -0.796939 | -0.597346 | 3.130821  |
| H | 0.361976  | -1.828206 | 3.714568  |
| H | -1.296383 | -2.315668 | 3.253878  |
| C | 4.333849  | 0.111171  | -0.159300 |
| H | 5.198459  | 0.759798  | -0.026940 |
| C | 3.127666  | 0.650632  | -0.633594 |
| C | 3.015211  | 2.127365  | -0.965246 |
| H | 2.278208  | 2.263079  | -1.767166 |
| H | 3.977551  | 2.473406  | -1.367085 |
| C | 2.650012  | 3.043347  | 0.230178  |
| H | 2.684525  | 4.084028  | -0.126852 |
| H | 3.437056  | 2.954049  | 0.993717  |
| C | 2.029183  | -0.206901 | -0.807145 |
| H | 1.092403  | 0.185848  | -1.192619 |
| C | 2.134481  | -1.568580 | -0.506552 |
| C | 3.341688  | -2.103478 | -0.045763 |
| H | 3.405928  | -3.166462 | 0.173964  |
| C | 4.436614  | -1.254280 | 0.125500  |
| H | 5.379437  | -1.664166 | 0.483709  |
| C | 1.286870  | 2.777979  | 0.891691  |
| H | 1.179977  | 3.458074  | 1.751004  |
| H | 1.279095  | 1.759944  | 1.309548  |
| C | 0.073299  | 2.935749  | -0.036806 |
| C | -1.268236 | 2.607049  | 0.645144  |
| C | -2.349948 | 2.167313  | -0.351171 |
| H | -1.955007 | 1.314799  | -0.919597 |
| H | -2.527238 | 2.962873  | -1.092280 |
| C | -3.691617 | 1.768173  | 0.294263  |

|   |           |           |           |
|---|-----------|-----------|-----------|
| H | -4.267745 | 2.677873  | 0.517005  |
| H | -3.504810 | 1.289803  | 1.267785  |
| H | -1.614960 | 3.466440  | 1.240007  |
| H | -1.112605 | 1.785712  | 1.362050  |
| H | 0.193719  | 2.266955  | -0.900195 |
| H | 0.047198  | 3.956523  | -0.449517 |
| C | -4.540699 | 0.818089  | -0.580248 |
| H | -4.347921 | 1.027038  | -1.643152 |
| H | -5.609587 | 1.019193  | -0.420627 |
| C | -4.326846 | -0.693693 | -0.304073 |
| H | -4.964902 | -1.259154 | -0.998016 |
| H | -4.693786 | -0.911335 | 0.708607  |

Sum of electronic and zero-point Energies= -1005.180149  
Sum of electronic and thermal Energies= -1005.157972  
Sum of electronic and thermal Enthalpies= -1005.157028  
Sum of electronic and thermal Free Energies= -1005.230974

#### daec[n=3]-4-TS (dmf)

|   |           |           |           |
|---|-----------|-----------|-----------|
| C | 3.281825  | -0.383999 | -0.093889 |
| H | 4.365787  | -0.423647 | -0.023497 |
| C | 2.629752  | 0.862916  | 0.018627  |
| C | 1.245136  | 0.854045  | -0.074239 |
| H | 0.678677  | 1.763186  | -0.016290 |
| C | 0.527997  | -0.320334 | -0.224777 |
| H | -0.544036 | -0.247726 | -0.247257 |
| C | 1.150969  | -1.551742 | -0.326710 |
| O | 0.432178  | -2.738137 | -0.462999 |
| C | 2.566803  | -1.586320 | -0.274241 |
| O | 3.139190  | -2.817240 | -0.383975 |
| C | 4.559607  | -2.904467 | -0.326588 |
| H | 4.796921  | -3.966292 | -0.440885 |
| H | 5.032704  | -2.337474 | -1.140761 |
| H | 4.948036  | -2.548161 | 0.637957  |
| C | -3.464228 | -2.176560 | 0.923624  |
| H | -4.444606 | -1.961022 | 1.346087  |
| C | -3.078564 | -1.564407 | -0.282158 |
| C | -3.942168 | -0.500863 | -0.940439 |
| H | -4.995118 | -0.813858 | -0.901880 |
| H | -3.673742 | -0.423338 | -2.003276 |
| C | -3.858293 | 0.921516  | -0.305049 |
| H | -4.170521 | 0.865040  | 0.748521  |
| H | -4.616033 | 1.535753  | -0.815183 |
| C | -1.823749 | -1.892697 | -0.815605 |
| H | -1.510984 | -1.458881 | -1.762500 |
| C | -0.908586 | -2.653040 | -0.074106 |
| C | -1.297371 | -3.260230 | 1.119022  |
| H | -0.583226 | -3.860478 | 1.677738  |
| C | -2.597904 | -3.045210 | 1.592563  |
| H | -2.916197 | -3.522179 | 2.517719  |
| C | -2.490976 | 1.630382  | -0.407688 |
| H | -2.087266 | 1.475473  | -1.420596 |
| H | -1.785596 | 1.155623  | 0.284406  |
| C | -2.520582 | 3.150892  | -0.130976 |
| C | -1.184938 | 3.879375  | -0.441141 |
| C | -0.086775 | 3.812897  | 0.652181  |
| H | -0.180246 | 2.868328  | 1.203129  |
| H | -0.271987 | 4.594548  | 1.403499  |
| C | 1.363554  | 3.962369  | 0.098730  |
| H | 1.583375  | 5.033187  | -0.012309 |
| H | 1.396282  | 3.559586  | -0.923002 |
| H | -1.399449 | 4.935169  | -0.662180 |
| H | -0.784464 | 3.459371  | -1.376730 |
| H | -2.820810 | 3.339233  | 0.911883  |
| H | -3.307412 | 3.598002  | -0.757476 |
| C | 2.497698  | 3.292110  | 0.945536  |
| H | 2.071493  | 2.871745  | 1.868072  |
| H | 3.201934  | 4.068951  | 1.271541  |
| C | 3.345223  | 2.188511  | 0.246202  |
| H | 4.245605  | 2.009448  | 0.851376  |
| H | 3.713349  | 2.582560  | -0.715587 |

Sum of electronic and zero-point Energies= -1005.147562  
Sum of electronic and thermal Energies= -1005.126276  
Sum of electronic and thermal Enthalpies= -1005.125332  
Sum of electronic and thermal Free Energies= -1005.196485

#### daec[n=3]-4-E1 (dmf)

|   |           |           |           |
|---|-----------|-----------|-----------|
| C | 1.914570  | -1.766986 | -0.723754 |
| H | 2.484510  | -1.758442 | -1.648348 |
| C | 2.563808  | -1.428185 | 0.474764  |
| C | 1.830058  | -1.454181 | 1.669026  |
| H | 2.314023  | -1.216352 | 2.614121  |
| C | 0.469061  | -1.767256 | 1.653062  |
| H | -0.112739 | -1.776148 | 2.572546  |
| C | -0.175708 | -2.070881 | 0.456274  |
| O | -1.526535 | -2.399756 | 0.465066  |
| C | 0.550149  | -2.094936 | -0.750837 |
| O | -0.149446 | -2.417785 | -1.870429 |
| C | 0.548885  | -2.442341 | -3.114483 |
| H | -0.194088 | -2.727008 | -3.864925 |
| H | 0.959666  | -1.454704 | -3.365438 |
| H | 1.359505  | -3.183796 | -3.105374 |
| C | -4.287197 | 0.722962  | 0.628972  |
| H | -5.015017 | 1.530550  | 0.689977  |
| C | -3.178856 | 0.853311  | -0.223533 |
| C | -2.980059 | 2.109582  | -1.051195 |
| H | -3.943897 | 2.629053  | -1.134765 |
| H | -2.683502 | 1.832371  | -2.073719 |
| C | -1.934568 | 3.107147  | -0.491689 |
| H | -2.177252 | 3.336381  | 0.557310  |
| H | -2.043443 | 4.051187  | -1.046867 |
| C | -2.259091 | -0.204858 | -0.290743 |
| H | -1.413196 | -0.145371 | -0.968412 |
| C | -2.426617 | -1.346686 | 0.498773  |
| C | -3.540128 | -1.478431 | 1.333529  |
| H | -3.658964 | -2.379269 | 1.930846  |
| C | -4.470245 | -0.437398 | 1.387690  |
| H | -5.339357 | -0.529348 | 2.036756  |
| C | -0.479437 | 2.630279  | -0.598051 |
| H | -0.259972 | 2.387942  | -1.650979 |
| H | -0.362971 | 1.694371  | -0.038188 |
| C | 0.550473  | 3.652799  | -0.094212 |
| C | 2.015371  | 3.226673  | -0.310778 |
| C | 2.418627  | 1.938610  | 0.423974  |
| H | 1.791800  | 1.109156  | 0.078103  |
| H | 2.206426  | 2.055882  | 1.499245  |
| C | 3.901107  | 1.572614  | 0.243905  |
| H | 4.509257  | 2.438209  | 0.549939  |
| H | 4.115540  | 1.419123  | -0.826136 |
| H | 2.674412  | 4.047256  | 0.013597  |
| H | 2.196850  | 3.099799  | -1.390444 |
| H | 0.381019  | 3.842085  | 0.977976  |
| H | 0.383754  | 4.614691  | -0.603745 |
| C | 4.388103  | 0.345499  | 1.041434  |
| H | 4.029600  | 0.418393  | 2.079108  |
| H | 5.485564  | 0.388291  | 1.100357  |
| C | 4.033567  | -1.046635 | 0.466587  |
| H | 4.593390  | -1.794289 | 1.049582  |
| H | 4.415702  | -1.113892 | -0.561502 |

Sum of electronic and zero-point Energies= -1005.181177  
Sum of electronic and thermal Energies= -1005.158858  
Sum of electronic and thermal Enthalpies= -1005.157914  
Sum of electronic and thermal Free Energies= -1005.232735

#### daec[n=3]-4-E2 (dmf)

|   |          |           |           |
|---|----------|-----------|-----------|
| C | 1.811400 | -1.806308 | 0.437724  |
| H | 2.321236 | -1.877557 | 1.393866  |
| C | 2.543935 | -1.427105 | -0.703016 |
| C | 1.885251 | -1.368569 | -1.935459 |
| H | 2.436206 | -1.091846 | -2.832300 |
| C | 0.513894 | -1.645074 | -2.025247 |

|   |           |           |           |
|---|-----------|-----------|-----------|
| H | -0.006250 | -1.592611 | -2.979288 |
| C | -0.211621 | -1.973600 | -0.887513 |
| O | -1.567435 | -2.257477 | -0.970593 |
| C | 0.440757  | -2.073081 | 0.363757  |
| O | -0.341229 | -2.425272 | 1.416641  |
| C | 0.263403  | -2.499275 | 2.706380  |
| H | -0.539631 | -2.778724 | 3.394276  |
| H | 1.051465  | -3.264329 | 2.737691  |
| H | 0.682611  | -1.529977 | 3.009611  |
| C | -4.269711 | 0.631715  | 0.353781  |
| H | -4.986846 | 1.371183  | 0.706650  |
| C | -3.143017 | 1.051057  | -0.370976 |
| C | -2.914621 | 2.522016  | -0.668477 |
| H | -3.863829 | 3.056200  | -0.528941 |
| H | -2.641145 | 2.642801  | -1.727394 |
| C | -1.832819 | 3.217117  | 0.196296  |
| H | -2.049958 | 3.041440  | 1.261093  |
| H | -1.927547 | 4.302035  | 0.037147  |
| C | -2.238240 | 0.075406  | -0.820878 |
| H | -1.374247 | 0.366878  | -1.410619 |
| C | -2.441741 | -1.275660 | -0.527389 |
| C | -3.574108 | -1.689799 | 0.179197  |
| H | -3.718271 | -2.746928 | 0.388041  |
| C | -4.486332 | -0.726070 | 0.613567  |
| H | -5.370222 | -1.036942 | 1.167923  |
| C | -0.392400 | 2.791078  | -0.119981 |
| H | -0.204873 | 2.940209  | -1.196144 |
| H | -0.284287 | 1.715294  | 0.063386  |
| C | 0.675174  | 3.549292  | 0.683515  |
| C | 2.122703  | 3.205626  | 0.281278  |
| C | 2.502651  | 1.730460  | 0.482237  |
| H | 1.847558  | 1.098520  | -0.127536 |
| H | 2.310192  | 1.449503  | 1.530669  |
| C | 3.970503  | 1.422680  | 0.144120  |
| H | 4.609471  | 2.104413  | 0.727014  |
| H | 4.163422  | 1.661895  | -0.914189 |
| H | 2.811611  | 3.837962  | 0.863058  |
| H | 2.277156  | 3.479201  | -0.775084 |
| H | 0.537205  | 3.343632  | 1.757233  |
| H | 0.521159  | 4.632410  | 0.558008  |
| C | 4.431378  | -0.020795 | 0.432504  |
| H | 4.095282  | -0.316778 | 1.437606  |
| H | 5.530488  | -0.028420 | 0.472048  |
| C | 4.023877  | -1.104544 | -0.593526 |
| H | 4.565567  | -2.025966 | -0.327830 |
| H | 4.393913  | -0.810908 | -1.585747 |

Sum of electronic and zero-point Energies= -1005.181703  
Sum of electronic and thermal Energies= -1005.159410  
Sum of electronic and thermal Enthalpies= -1005.158466  
Sum of electronic and thermal Free Energies= -1005.233039

daec[n=3]-5-TS (dmf)

|   |           |           |           |
|---|-----------|-----------|-----------|
| C | 2.303126  | 2.406448  | -0.255718 |
| H | 3.058915  | 3.182998  | -0.144133 |
| C | 2.650295  | 1.045528  | -0.244934 |
| C | 1.603573  | 0.145540  | -0.398756 |
| H | 1.812191  | -0.904593 | -0.423811 |
| C | 0.283547  | 0.534331  | -0.498008 |
| H | -0.453932 | -0.246988 | -0.555606 |
| C | -0.072322 | 1.880403  | -0.501238 |
| O | -1.394888 | 2.309957  | -0.599458 |
| C | 0.966347  | 2.831543  | -0.399075 |
| O | 0.706941  | 4.181516  | -0.462075 |
| C | 0.135551  | 4.740846  | -0.726404 |
| H | 0.805264  | 4.600655  | 1.587631  |
| H | -0.843385 | 4.298655  | 0.949909  |
| H | 0.013312  | 5.812115  | 0.534880  |
| C | -3.990056 | -0.685198 | 0.711739  |
| H | -4.584523 | -1.495645 | 1.130251  |
| C | -3.223204 | -0.904901 | -0.446148 |

|   |           |           |           |
|---|-----------|-----------|-----------|
| C | -3.039096 | -2.288327 | -1.051383 |
| H | -2.421874 | -2.199247 | -1.954931 |
| H | -4.008550 | -2.694282 | -1.377132 |
| C | -2.417490 | -3.336338 | -0.081362 |
| H | -2.359814 | -4.291186 | -0.625777 |
| H | -3.141237 | -3.501026 | 0.729812  |
| C | -2.505555 | 0.177156  | -0.972382 |
| H | -1.952515 | 0.049905  | -1.898680 |
| C | -2.362563 | 1.364397  | -0.242855 |
| C | -3.121101 | 1.579237  | 0.906814  |
| H | -3.021614 | 2.510343  | 1.459497  |
| C | -3.971899 | 0.558045  | 1.350502  |
| H | -4.577999 | 0.718019  | 2.240282  |
| C | -1.046672 | -3.046256 | 0.580145  |
| H | -0.953688 | -3.739661 | 1.430465  |
| H | -1.060937 | -2.039303 | 1.023142  |
| C | 0.222258  | -3.193514 | -0.286720 |
| C | 1.526719  | -3.017036 | 0.534299  |
| C | 2.815564  | -2.883807 | -0.320935 |
| H | 2.592039  | -2.357997 | -1.259976 |
| H | 3.125226  | -3.891011 | -0.638314 |
| C | 4.053879  | -2.235832 | 0.359774  |
| H | 4.888784  | -2.309947 | -0.354357 |
| H | 4.335225  | -2.883624 | 1.204828  |
| H | 1.639339  | -3.868084 | 1.222890  |
| H | 1.411806  | -2.135607 | 1.179803  |
| H | 0.205340  | -2.454928 | -1.101808 |
| H | 0.225292  | -4.181371 | -0.773806 |
| C | 4.049493  | -0.785483 | 0.933788  |
| H | 3.240712  | -0.675699 | 1.669381  |
| H | 4.979834  | -0.719307 | 1.515300  |
| C | 4.035007  | 0.458430  | -0.019953 |
| H | 4.689295  | 1.231639  | 0.404012  |
| H | 4.488656  | 0.182102  | -0.985468 |

Sum of electronic and zero-point Energies= -1005.139888  
Sum of electronic and thermal Energies= -1005.118563  
Sum of electronic and thermal Enthalpies= -1005.117619  
Sum of electronic and thermal Free Energies= -1005.188789

daec[n=3]-5-E1 (dmf)

|   |           |           |           |
|---|-----------|-----------|-----------|
| C | 1.921802  | 1.811724  | -0.619483 |
| H | 2.465793  | 1.984646  | -1.546339 |
| C | 2.576401  | 1.277596  | 0.498550  |
| C | 1.830667  | 1.096353  | 1.675970  |
| H | 2.315891  | 0.714287  | 2.572125  |
| C | 0.467405  | 1.388874  | 1.712085  |
| H | -0.113966 | 1.230492  | 2.618092  |
| C | -0.178240 | 1.879354  | 0.575344  |
| O | -1.539133 | 2.154394  | 0.623171  |
| C | 0.553942  | 2.114898  | -0.599159 |
| O | -0.044125 | 2.557736  | -1.751519 |
| C | -0.523248 | 3.909643  | -1.715298 |
| H | 0.301702  | 4.609415  | -1.518459 |
| H | -1.304947 | 4.041532  | -0.957964 |
| H | -0.939441 | 4.111461  | -2.707450 |
| C | -4.282267 | -0.955498 | 0.166195  |
| H | -5.016736 | -1.751669 | 0.055331  |
| C | -2.993361 | -1.121533 | -0.363265 |
| C | -2.599513 | -2.397677 | -1.082177 |
| H | -1.938309 | -2.151119 | -1.923452 |
| H | -3.500360 | -2.851154 | -1.517389 |
| C | -1.916722 | -3.466382 | -0.191266 |
| H | -1.788579 | -4.372772 | -0.802559 |
| H | -2.608163 | -3.738297 | 0.620194  |
| C | -2.065827 | -0.078149 | -0.215430 |
| H | -1.070549 | -0.181669 | -0.636206 |
| C | -2.416269 | 1.096026  | 0.456711  |
| C | -3.705050 | 1.262642  | 0.974612  |
| H | -3.961453 | 2.185953  | 1.488613  |
| C | -4.632142 | 0.229997  | 0.821729  |

|   |           |           |           |
|---|-----------|-----------|-----------|
| H | -5.637368 | 0.352159  | 1.221356  |
| C | -0.559639 | -3.080315 | 0.423895  |
| H | -0.233613 | -3.906745 | 1.074475  |
| H | -0.689919 | -2.210773 | 1.085133  |
| C | 0.553171  | -2.772973 | -0.589917 |
| C | 1.898499  | -2.422955 | 0.068168  |
| C | 2.915058  | -1.845212 | -0.928152 |
| H | 2.496975  | -0.929924 | -1.371269 |
| H | 3.035568  | -2.553896 | -1.762955 |
| C | 4.313410  | -1.553907 | -0.353636 |
| H | 4.962075  | -1.216345 | -1.177259 |
| H | 4.748677  | -2.501658 | 0.001058  |
| H | 2.318614  | -3.319565 | 0.551796  |
| H | 1.721282  | -1.696179 | 0.873609  |
| H | 0.247450  | -1.931725 | -1.228530 |
| H | 0.685558  | -3.632283 | -1.266853 |
| C | 4.424002  | -0.532710 | 0.795840  |
| H | 3.836928  | -0.868280 | 1.661942  |
| H | 5.471870  | -0.536893 | 1.129213  |
| C | 4.055384  | 0.934541  | 0.459924  |
| H | 4.570702  | 1.579397  | 1.187729  |
| H | 4.465611  | 1.198535  | -0.524641 |

Sum of electronic and zero-point Energies= -1005.177652

Sum of electronic and thermal Energies= -1005.155263

Sum of electronic and thermal Enthalpies= -1005.154319

Sum of electronic and thermal Free Energies= -1005.229268

daec[n=3]-5-E2 (dmf)

|   |           |           |           |
|---|-----------|-----------|-----------|
| C | 1.819429  | 1.593115  | 0.641192  |
| H | 2.282846  | 1.531099  | 1.621440  |
| C | 2.602958  | 1.348780  | -0.502756 |
| C | 2.008246  | 1.471403  | -1.762874 |
| H | 2.599925  | 1.305698  | -2.661115 |
| C | 0.646695  | 1.783845  | -1.880068 |
| H | 0.172586  | 1.862267  | -2.856130 |
| C | -0.128943 | 1.978134  | -0.744531 |
| O | -1.475251 | 2.291924  | -0.857987 |
| C | 0.459457  | 1.902026  | 0.538365  |
| O | -0.368592 | 2.134232  | 1.589142  |
| C | 0.175200  | 2.046451  | 2.905166  |
| H | 0.971799  | 2.786942  | 3.060579  |
| H | 0.565164  | 1.040519  | 3.112624  |
| H | -0.655549 | 2.260601  | 3.583485  |
| C | -4.330468 | -0.648872 | -0.079405 |
| H | -5.094496 | -1.399029 | 0.118674  |
| C | -3.047386 | -1.052850 | -0.479097 |
| C | -2.700088 | -2.521033 | -0.637696 |
| H | -2.033342 | -2.644047 | -1.501538 |
| H | -3.617389 | -3.078206 | -0.871714 |
| C | -2.051648 | -3.181829 | 0.605111  |
| H | -1.956688 | -4.258087 | 0.394518  |
| H | -2.749365 | -3.094879 | 1.451382  |
| C | -2.082806 | -0.066367 | -0.737959 |
| H | -1.090868 | -0.358626 | -1.068778 |
| C | -2.389106 | 1.289239  | -0.588217 |
| C | -3.673037 | 1.688551  | -0.202325 |
| H | -3.896698 | 2.747796  | -0.100269 |
| C | -4.637259 | 0.710509  | 0.048952  |
| H | -5.638722 | 1.013641  | 0.349793  |
| C | -0.680016 | -2.632607 | 1.037004  |
| H | -0.378375 | -3.156477 | 1.957405  |
| H | -0.779934 | -1.572418 | 1.313697  |
| C | 0.438819  | -2.771084 | -0.007212 |
| C | 1.796951  | -2.238139 | 0.481190  |
| C | 2.820805  | -2.083700 | -0.653833 |
| H | 2.422172  | -1.378632 | -1.397073 |
| H | 2.918665  | -3.048173 | -1.177263 |
| C | 4.230354  | -1.641090 | -0.218820 |
| H | 4.881217  | -1.636710 | -1.107366 |
| H | 4.644439  | -2.411210 | 0.451264  |

|   |          |           |           |
|---|----------|-----------|-----------|
| H | 2.199393 | -2.907404 | 1.258615  |
| H | 1.641265 | -1.264582 | 0.967056  |
| H | 0.157515 | -2.228590 | -0.921350 |
| H | 0.540932 | -3.827385 | -0.303754 |
| C | 4.376357 | -0.281018 | 0.492967  |
| H | 3.774025 | -0.266258 | 1.411913  |
| H | 5.422111 | -0.202960 | 0.824269  |
| C | 4.069266 | 0.984177  | -0.347082 |
| H | 4.582154 | 1.830813  | 0.134335  |
| H | 4.523275 | 0.879204  | -1.342372 |

Sum of electronic and zero-point Energies= -1005.181644

Sum of electronic and thermal Energies= -1005.159591

Sum of electronic and thermal Enthalpies= -1005.158647

Sum of electronic and thermal Free Energies= -1005.232033

daec[n=4]-1-TS (dmf)

|   |           |           |           |
|---|-----------|-----------|-----------|
| C | -0.075691 | 3.336305  | -0.113224 |
| H | -0.018450 | 4.386494  | -0.387171 |
| C | 1.087971  | 2.545180  | -0.192936 |
| C | 0.976439  | 1.204556  | 0.162731  |
| H | 1.831425  | 0.546289  | 0.128762  |
| C | -0.240531 | 0.655356  | 0.554255  |
| H | -0.258659 | -0.393428 | 0.804055  |
| C | -1.401402 | 1.416460  | 0.589006  |
| O | -2.651791 | 0.890509  | 0.913594  |
| C | -1.315161 | 2.794079  | 0.269140  |
| O | -2.477844 | 3.497479  | 0.335464  |
| C | -2.441784 | 4.884727  | 0.013119  |
| H | -3.466473 | 5.245617  | 0.141828  |
| H | -2.127214 | 5.050333  | -1.026922 |
| H | -1.774477 | 5.439188  | 0.687828  |
| C | -3.239206 | -2.847879 | -0.853990 |
| H | -3.325644 | -3.789648 | -1.393969 |
| C | -2.304770 | -2.721638 | 0.185150  |
| C | -1.209643 | -3.741277 | 0.434262  |
| H | -1.582919 | -4.770895 | 0.348493  |
| H | -0.823142 | -3.619636 | 1.455433  |
| C | -0.056783 | -3.525295 | -0.591791 |
| H | 0.055473  | -2.448232 | -0.776852 |
| H | -0.374112 | -3.958776 | -1.550481 |
| C | -2.241186 | -1.503132 | 0.875849  |
| H | -1.583974 | -1.416082 | 1.735171  |
| C | -2.923015 | -0.378530 | 0.404108  |
| C | -3.853667 | -0.504096 | -0.630348 |
| H | -4.397386 | 0.372046  | -0.975459 |
| C | -4.035477 | -1.757610 | -1.225336 |
| H | -4.764581 | -1.868367 | -2.026002 |
| C | 1.312089  | -4.110051 | -0.176879 |
| H | 1.149044  | -5.029118 | 0.406047  |
| H | 1.858284  | -4.422601 | -1.079591 |
| C | 3.891946  | -1.208180 | 0.650672  |
| C | 2.218114  | -3.152691 | 0.630660  |
| H | 2.994921  | -3.750148 | 1.132491  |
| H | 1.633773  | -2.683787 | 1.438691  |
| C | 4.694057  | -0.089459 | -0.083215 |
| H | 4.739140  | -0.313156 | -1.159857 |
| C | 2.920680  | -2.055783 | -0.198116 |
| H | 2.173797  | -1.412878 | -0.685365 |
| H | 3.486688  | -2.533963 | -1.013454 |
| H | 5.733039  | -0.148937 | 0.267174  |
| C | 4.206323  | 1.375775  | 0.125627  |
| H | 5.075083  | 2.010801  | 0.349883  |
| H | 3.584958  | 1.418148  | 1.029828  |
| H | 4.610767  | -1.904818 | 1.107611  |
| H | 3.342377  | -0.763996 | 1.494691  |
| C | 3.453841  | 2.019313  | -1.069151 |
| H | 2.948400  | 1.244176  | -1.661736 |
| H | 4.193914  | 2.470084  | -1.744734 |
| C | 2.417982  | 3.101957  | -0.685793 |
| H | 2.224807  | 3.743009  | -1.558120 |



H 2.851464 3.769844 0.076459  
Sum of electronic and zero-point Energies= -1044.433532  
Sum of electronic and thermal Energies= -1044.410708  
Sum of electronic and thermal Enthalpies= -1044.409764  
Sum of electronic and thermal Free Energies= -1044.485138

daec[n=4]-1-E1 (dmf)

C -1.355966 2.374371 0.689253  
H -1.897853 2.345732 1.630218  
C -2.081616 2.378884 -0.517007  
C -1.381072 2.438733 -1.725996  
H -1.925240 2.455068 -2.668208  
C 0.019495 2.443375 -1.735523  
H 0.573478 2.464857 -2.671634  
C 0.727843 2.386344 -0.542669  
O 2.114833 2.369929 -0.554672  
C 0.043302 2.371607 0.693244  
O 0.820875 2.336277 1.805433  
C 0.173087 2.287007 3.075650  
H 0.976943 2.259820 3.816755  
H -0.445977 1.384987 3.176231  
H -0.447329 3.177755 3.244852  
C 4.170390 -1.256115 -0.332519  
H 4.731673 -2.187734 -0.282605  
C 2.779295 -1.288855 -0.498782  
C 2.011324 -2.593553 -0.579697  
H 2.676925 -3.398055 -0.922452  
H 1.220608 -2.493078 -1.335414  
C 1.379970 -3.000183 0.770150  
H 0.824968 -2.144249 1.178520  
H 2.189102 -3.204111 1.486944  
C 2.075135 -0.075638 -0.567019  
H 0.998159 -0.092869 -0.708616  
C 2.747216 1.145624 -0.467265  
C 4.138377 1.175230 -0.303680  
H 4.647443 2.133590 -0.233445  
C 4.839216 -0.029189 -0.238333  
H 5.920588 -0.009935 -0.113602  
C 0.458365 -4.231932 0.696063  
H 1.026410 -5.080228 0.283411  
H 0.188584 -4.519103 1.724227  
C -3.120724 -2.881450 -0.339574  
C -0.839085 -4.059725 -0.119511  
H -1.380460 -5.018614 -0.105641  
H -0.598368 -3.868671 -1.176332  
C -3.975258 -1.662521 0.063460  
H -3.975630 -1.577192 1.162111  
C -1.770089 -2.950580 0.393338  
H -1.260824 -1.980728 0.309233  
H -1.957697 -3.101226 1.468951  
H -5.022899 -1.832439 -0.226975  
C -3.489114 -0.339485 -0.553075  
H -3.719967 -0.335182 -1.630290  
H -2.394655 -0.285390 -0.479768  
H -3.682034 -3.806179 -0.136762  
H -2.950561 -2.861681 -1.428180  
C -4.084841 0.910195 0.110019  
H -3.842419 0.892370 1.183210  
H -5.183094 0.884363 0.044466  
C -3.593166 2.246795 -0.496047  
H -4.036198 3.072426 0.080576  
H -3.971843 2.342416 -1.522752  
Sum of electronic and zero-point Energies= -1044.469489  
Sum of electronic and thermal Energies= -1044.445891  
Sum of electronic and thermal Enthalpies= -1044.444947  
Sum of electronic and thermal Free Energies= -1044.522808

daec[n=4]-1-E2 (dmf)

C -1.180736 2.574955 -0.641459  
H -1.646208 2.718250 -1.612312

C -2.002311 2.433262 0.489535  
C -1.402154 2.267689 1.744772  
H -2.018431 2.177252 2.637241  
C -0.011041 2.178287 1.855198  
H 0.465724 2.018008 2.819971  
C 0.792768 2.271276 0.723859  
O 2.170250 2.165523 0.848206  
C 0.215453 2.505000 -0.541466  
O 1.078590 2.616916 -1.583297  
C 0.535499 2.824262 -2.886395  
H 1.395767 2.887456 -3.558786  
H -0.036532 3.760710 -2.938165  
H -0.105329 1.986160 -3.192884  
C 4.106455 -1.413955 -0.079502  
H 4.636636 -2.335015 -0.316100  
C 2.710156 -1.366981 -0.185730  
C 1.894032 -2.576567 -0.598886  
H 2.538018 -3.301087 -1.116428  
H 1.131611 -2.258037 -1.322951  
C 1.204379 -3.272693 0.594933  
H 0.667895 -2.519508 1.188308  
H 1.981343 -3.680828 1.258165  
C 2.046008 -0.167924 0.120769  
H 0.963506 -0.124710 0.040232  
C 2.762956 0.962466 0.520982  
C 4.159669 0.913069 0.624063  
H 4.703546 1.802133 0.934579  
C 4.820273 -0.277942 0.323204  
H 5.905442 -0.319353 0.400615  
C 0.240701 -4.407721 0.201104  
H 0.792986 -5.161050 -0.382055  
H -0.082804 -4.915447 1.123009  
C -3.233490 -2.682690 -0.610020  
C -1.013479 -3.988898 -0.592416  
H -1.595123 -4.897233 -0.814606  
H -0.721139 -3.576156 -1.569931  
C -4.054905 -1.541447 0.023418  
H -4.109023 -1.702809 1.112132  
C -1.917454 -2.978178 0.129702  
H -1.365737 -2.040074 0.279942  
H -2.153609 -3.355021 1.138161  
H -5.092021 -1.586862 -0.341691  
C -3.481858 -0.142628 -0.259610  
H -3.623612 0.096770 -1.325710  
H -2.396182 -0.156127 -0.095436  
H -3.840084 -3.600740 -0.634297  
H -3.018099 -2.433106 -1.661595  
C -4.093372 0.968252 0.605201  
H -3.942007 0.718568 1.666173  
H -5.182339 1.008570 0.450901  
C -3.510360 2.377100 0.333992  
H -3.985857 3.088201 1.024974  
H -3.782190 2.693619 -0.682218  
Sum of electronic and zero-point Energies= -1044.469578  
Sum of electronic and thermal Energies= -1044.445973  
Sum of electronic and thermal Enthalpies= -1044.445029  
Sum of electronic and thermal Free Energies= -1044.522792

daec[n=4]-2-TS (dmf)

C -2.902134 -1.816032 0.035612  
H -3.847958 -2.311193 0.238866  
C -2.878486 -0.411765 -0.094702  
C -1.648799 0.179784 -0.362193  
H -1.558856 1.244170 -0.507321  
C -0.478802 -0.569209 -0.449053  
H 0.442824 -0.032975 -0.610322  
C -0.493666 -1.950781 -0.319652  
O 0.634366 -2.757589 -0.403796  
C -1.737670 -2.591337 -0.086410  
O -1.698026 -3.947989 0.017928

|   |           |           |           |
|---|-----------|-----------|-----------|
| C | -2.918125 | -4.635486 | 0.278115  |
| H | -3.651410 | -4.476778 | -0.525096 |
| H | -3.358022 | -4.329162 | 1.237722  |
| H | -2.656882 | -5.696895 | 0.237596  |
| C | 4.255913  | -0.887727 | 0.502526  |
| H | 5.162662  | -0.365920 | 0.803949  |
| C | 3.499300  | -0.408464 | -0.580283 |
| C | 3.802093  | 0.916854  | -1.257731 |
| H | 3.095361  | 1.061894  | -2.085350 |
| H | 4.807465  | 0.901088  | -1.704405 |
| C | 3.748575  | 2.128978  | -0.287464 |
| H | 3.963371  | 3.037615  | -0.870058 |
| H | 4.587352  | 2.021258  | 0.414989  |
| C | 2.357697  | -1.125923 | -0.958719 |
| H | 1.804732  | -0.814518 | -1.839400 |
| C | 1.873178  | -2.172913 | -0.165549 |
| C | 2.624402  | -2.643769 | 0.912317  |
| H | 2.248615  | -3.470148 | 1.510729  |
| C | 3.838096  | -2.015524 | 1.215154  |
| H | 4.436507  | -2.382532 | 2.047044  |
| C | 2.468615  | 2.349341  | 0.553977  |
| H | 2.136344  | 1.390514  | 0.978451  |
| H | 2.762747  | 2.964406  | 1.418260  |
| C | -0.959864 | 4.346411  | 0.459552  |
| C | 1.269556  | 3.057703  | -0.113691 |
| H | 0.842474  | 2.433161  | -0.912634 |
| H | 1.623918  | 3.981075  | -0.599433 |
| C | -2.101127 | 3.691988  | -0.347087 |
| H | -1.671131 | 3.102670  | -1.170616 |
| C | 0.189543  | 3.423353  | 0.930925  |
| H | 0.700649  | 3.934240  | 1.761449  |
| H | -0.223019 | 2.499803  | 1.364354  |
| H | -2.687582 | 4.484153  | -0.836985 |
| C | -3.065637 | 2.813728  | 0.484129  |
| H | -3.676646 | 3.471282  | 1.119252  |
| H | -2.489021 | 2.193294  | 1.181693  |
| H | -0.526201 | 5.163018  | -0.138188 |
| H | -1.398703 | 4.828896  | 1.346861  |
| C | -3.997102 | 1.909782  | -0.378854 |
| H | -5.005545 | 2.344143  | -0.400531 |
| H | -3.650638 | 1.916098  | -1.422719 |
| C | -4.130338 | 0.438356  | 0.078392  |
| H | -4.434041 | 0.416088  | 1.137992  |
| H | -4.961384 | -0.028222 | -0.471072 |

Sum of electronic and zero-point Energies= -1044.440421  
Sum of electronic and thermal Energies= -1044.417835  
Sum of electronic and thermal Enthalpies= -1044.416891  
Sum of electronic and thermal Free Energies= -1044.491076

daec[n=4]-2-E1 (dmf)

|   |           |           |           |
|---|-----------|-----------|-----------|
| C | -1.175177 | -2.629662 | -0.501645 |
| H | -1.574979 | -2.950629 | -1.459549 |
| C | -2.069492 | -2.272016 | 0.523843  |
| C | -1.554620 | -1.884982 | 1.766093  |
| H | -2.230879 | -1.625363 | 2.577967  |
| C | -0.171935 | -1.782792 | 1.957318  |
| H | 0.240005  | -1.447114 | 2.906611  |
| C | 0.703101  | -2.082792 | 0.921179  |
| O | 2.069003  | -1.955157 | 1.121601  |
| C | 0.210122  | -2.548211 | -0.317462 |
| O | 1.142862  | -2.858163 | -1.253816 |
| C | 0.688853  | -3.293231 | -2.534660 |
| H | 0.089908  | -2.518674 | -3.032968 |
| H | 0.101138  | -4.218293 | -2.459067 |
| H | 1.592862  | -3.485144 | -3.119487 |
| C | 4.111211  | 1.426063  | -0.216844 |
| H | 4.671679  | 2.293683  | -0.561530 |
| C | 2.744956  | 1.315496  | -0.519488 |
| C | 2.042020  | 2.396632  | -1.319344 |
| H | 1.180841  | 1.963416  | -1.844917 |

|   |           |           |           |
|---|-----------|-----------|-----------|
| H | 2.730793  | 2.758570  | -2.095341 |
| C | 1.582231  | 3.619292  | -0.487806 |
| H | 1.330160  | 4.430501  | -1.187694 |
| H | 2.438222  | 3.979247  | 0.101838  |
| C | 2.042557  | 0.184949  | -0.074299 |
| H | 0.986325  | 0.088179  | -0.307506 |
| C | 2.695739  | -0.818786 | 0.651473  |
| C | 4.059226  | -0.705728 | 0.946399  |
| H | 4.550362  | -1.496773 | 1.508197  |
| C | 4.757342  | 0.421404  | 0.510224  |
| H | 5.818694  | 0.511274  | 0.735489  |
| C | 0.384453  | 3.389991  | 0.450997  |
| H | 0.591624  | 2.541768  | 1.121472  |
| H | 0.290493  | 4.272844  | 1.102172  |
| C | -3.533074 | 2.957372  | 0.054948  |
| C | -0.960518 | 3.165057  | -0.261619 |
| H | -0.922610 | 2.233846  | -0.844627 |
| H | -1.121832 | 3.975638  | -0.991051 |
| C | -3.778703 | 1.633517  | -0.695045 |
| H | -3.076015 | 1.546544  | -1.537725 |
| C | -2.148760 | 3.123948  | 0.712878  |
| H | -2.157610 | 4.061361  | 1.290655  |
| H | -1.986480 | 2.323228  | 1.449807  |
| H | -4.783434 | 1.670841  | -1.144365 |
| C | -3.658875 | 0.381114  | 0.184823  |
| H | -4.347708 | 0.463156  | 1.041202  |
| H | -2.648928 | 0.341699  | 0.612220  |
| H | -3.694585 | 3.792432  | -0.644712 |
| H | -4.301697 | 3.065006  | 0.836345  |
| C | -3.933282 | -0.930932 | -0.565311 |
| H | -4.997685 | -0.988410 | -0.837768 |
| H | -3.371585 | -0.934310 | -1.511891 |
| C | -3.555288 | -2.204348 | 0.233577  |
| H | -4.118145 | -2.224346 | 1.177091  |
| H | -3.866380 | -3.085772 | -0.344526 |

Sum of electronic and zero-point Energies= -1044.468736  
Sum of electronic and thermal Energies= -1044.445275  
Sum of electronic and thermal Enthalpies= -1044.444331  
Sum of electronic and thermal Free Energies= -1044.521544

daec[n=4]-2-E2 (dmf)

|   |           |           |           |
|---|-----------|-----------|-----------|
| C | -1.500822 | -2.097915 | 0.758257  |
| H | -2.074867 | -1.889620 | 1.656378  |
| C | -2.182163 | -2.269764 | -0.459688 |
| C | -1.444291 | -2.571536 | -1.611045 |
| H | -1.955614 | -2.729019 | -2.558986 |
| C | -0.047494 | -2.635153 | -1.559832 |
| H | 0.538130  | -2.844543 | -2.452533 |
| C | 0.621162  | -2.400730 | -0.363818 |
| O | 2.006317  | -2.439397 | -0.318106 |
| C | -0.102992 | -2.154044 | 0.821818  |
| O | 0.635261  | -1.966506 | 1.945784  |
| C | -0.053273 | -1.674461 | 3.160523  |
| H | -0.725570 | -2.494170 | 3.448613  |
| H | -0.627063 | -0.740566 | 3.082848  |
| H | 0.724240  | -1.559843 | 3.921125  |
| C | 4.198913  | 1.108488  | -0.378099 |
| H | 4.799515  | 2.016412  | -0.403783 |
| C | 2.855110  | 1.150863  | -0.783887 |
| C | 2.234215  | 2.449923  | -1.264471 |
| H | 1.339170  | 2.229391  | -1.860722 |
| H | 2.944415  | 2.945561  | -1.941552 |
| C | 1.878569  | 3.451055  | -0.139100 |
| H | 1.677001  | 4.428126  | -0.603957 |
| H | 2.766972  | 3.591712  | 0.493961  |
| C | 2.103143  | -0.033180 | -0.753572 |
| H | 1.067271  | -0.017366 | -1.080417 |
| C | 2.683422  | -1.235019 | -0.328121 |
| C | 4.023761  | -1.273050 | 0.069363  |
| H | 4.458493  | -2.216141 | 0.391865  |

|   |           |           |           |
|---|-----------|-----------|-----------|
| C | 4.772964  | -0.094944 | 0.041974  |
| H | 5.817335  | -0.120130 | 0.348468  |
| C | 0.681804  | 3.072935  | 0.751370  |
| H | 0.835641  | 2.069692  | 1.178110  |
| H | 0.665172  | 3.765294  | 1.607329  |
| C | -3.264453 | 3.037862  | 0.411116  |
| C | -0.688694 | 3.129221  | 0.054010  |
| H | -0.739950 | 2.362373  | -0.731987 |
| H | -0.793714 | 4.099573  | -0.458280 |
| C | -3.631735 | 1.933863  | -0.599769 |
| H | -2.972592 | 1.996855  | -1.478975 |
| C | -1.857954 | 2.953016  | 1.036356  |
| H | -1.781887 | 3.733368  | 1.809573  |
| H | -1.743737 | 1.996784  | 1.568761  |
| H | -4.649371 | 2.130097  | -0.972166 |
| C | -3.561405 | 0.511785  | -0.025725 |
| H | -4.179786 | 0.449035  | 0.884483  |
| H | -2.531352 | 0.310390  | 0.293672  |
| H | -3.375312 | 4.016907  | -0.080930 |
| H | -4.004445 | 3.024164  | 1.226683  |
| C | -4.000176 | -0.580150 | -1.012582 |
| H | -5.083133 | -0.504302 | -1.191515 |
| H | -3.513390 | -0.412650 | -1.985499 |
| C | -3.674873 | -2.022160 | -0.544190 |
| H | -4.142507 | -2.201332 | 0.434159  |
| H | -4.128105 | -2.730248 | -1.251473 |

Sum of electronic and zero-point Energies= -1044.468766  
Sum of electronic and thermal Energies= -1044.445261  
Sum of electronic and thermal Enthalpies= -1044.444317  
Sum of electronic and thermal Free Energies= -1044.521735

#### daec[n=4]-3-TS (dmf)

|   |           |           |           |
|---|-----------|-----------|-----------|
| C | 2.728093  | 2.037113  | -0.081928 |
| H | 3.638553  | 2.619579  | 0.033142  |
| C | 2.817170  | 0.631108  | -0.152477 |
| C | 1.629490  | -0.073863 | -0.303776 |
| H | 1.632316  | -1.147551 | -0.396147 |
| C | 0.393210  | 0.566130  | -0.333647 |
| H | -0.489894 | -0.050460 | -0.397638 |
| C | 0.298163  | 1.948700  | -0.271127 |
| O | -0.897172 | 2.653240  | -0.308226 |
| C | 1.494399  | 2.703273  | -0.155358 |
| O | 1.340776  | 4.055052  | -0.106883 |
| C | 2.509998  | 4.856912  | 0.029368  |
| H | 3.195149  | 4.720657  | -0.819281 |
| H | 3.043143  | 4.638743  | 0.965448  |
| H | 2.159068  | 5.892934  | 0.047195  |
| C | -4.357248 | 0.501700  | 0.607597  |
| H | -5.226619 | -0.083370 | 0.903155  |
| C | -3.574960 | 0.088524  | -0.484490 |
| C | -3.813101 | -1.234490 | -1.190753 |
| H | -3.138201 | -1.303970 | -2.053808 |
| H | -4.837079 | -1.273500 | -1.590962 |
| C | -3.630300 | -2.472901 | -0.270973 |
| H | -3.825446 | -3.371244 | -0.876233 |
| H | -4.424957 | -2.444619 | 0.488555  |
| C | -2.482948 | 0.883206  | -0.855815 |
| H | -1.904289 | 0.613583  | -1.734235 |
| C | -2.077422 | 1.961902  | -0.060115 |
| C | -2.855174 | 2.367351  | 1.025326  |
| H | -2.540638 | 3.217909  | 1.625207  |
| C | -4.016194 | 1.647759  | 1.331198  |
| H | -4.634672 | 1.962926  | 2.169627  |
| C | -2.283643 | -2.637097 | 0.467772  |
| H | -2.045717 | -1.705720 | 1.003187  |
| H | -2.433866 | -3.396911 | 1.250346  |
| C | 1.443069  | -3.721784 | -0.306676 |
| C | -1.065462 | -3.062419 | -0.374073 |
| H | -0.850772 | -2.304054 | -1.142413 |
| H | -1.304851 | -3.989871 | -0.918817 |

|   |           |           |           |
|---|-----------|-----------|-----------|
| C | 2.761031  | -3.777262 | 0.505062  |
| H | 3.502113  | -4.346185 | -0.077961 |
| C | 0.196062  | -3.283267 | 0.488094  |
| H | -0.020717 | -4.044586 | 1.254291  |
| H | 0.408908  | -2.356789 | 1.040537  |
| H | 2.580595  | -4.367946 | 1.416600  |
| C | 3.396559  | -2.426936 | 0.915241  |
| H | 4.166179  | -2.626781 | 1.675338  |
| H | 2.644946  | -1.807937 | 1.421069  |
| H | 1.254977  | -4.724882 | -0.719145 |
| H | 1.573360  | -3.069682 | -1.183364 |
| C | 4.056059  | -1.639231 | -0.246788 |
| H | 3.528826  | -1.840234 | -1.190076 |
| H | 5.074683  | -2.024767 | -0.393748 |
| C | 4.145992  | -0.108224 | -0.050452 |
| H | 4.844726  | 0.303233  | -0.794506 |
| H | 4.604287  | 0.107928  | 0.928248  |

Sum of electronic and zero-point Energies= -1044.446838  
Sum of electronic and thermal Energies= -1044.424506  
Sum of electronic and thermal Enthalpies= -1044.423561  
Sum of electronic and thermal Free Energies= -1044.496664

#### daec[n=4]-3-E1 (dmf)

|   |           |           |           |
|---|-----------|-----------|-----------|
| C | 1.530559  | 2.213987  | -0.666912 |
| H | 1.960335  | 2.394291  | -1.648390 |
| C | 2.388558  | 1.899167  | 0.403114  |
| C | 1.834988  | 1.691035  | 1.671911  |
| H | 2.481329  | 1.471042  | 2.518815  |
| C | 0.448830  | 1.753298  | 1.857886  |
| H | 0.006935  | 1.582745  | 2.837250  |
| C | -0.393542 | 2.039646  | 0.790089  |
| O | -1.755441 | 2.160048  | 1.016945  |
| C | 0.144259  | 2.298428  | -0.489768 |
| O | -0.750060 | 2.608134  | -1.463217 |
| C | -0.253146 | 2.853544  | -2.778073 |
| H | 0.259974  | 1.971390  | -3.184789 |
| H | 0.429326  | 3.714313  | -2.794706 |
| H | -1.132124 | 3.076238  | -3.389503 |
| C | -4.471422 | -0.838412 | 0.014286  |
| H | -5.204363 | -1.603188 | -0.237652 |
| C | -3.134715 | -1.002407 | -0.379258 |
| C | -2.703818 | -2.240771 | -1.142250 |
| H | -1.919733 | -1.973019 | -1.862761 |
| H | -3.556851 | -2.603221 | -1.731770 |
| C | -2.210506 | -3.409552 | -0.252698 |
| H | -2.118010 | -4.302558 | -0.889583 |
| H | -2.993112 | -3.638464 | 0.485686  |
| C | -2.203895 | -0.001638 | -0.052689 |
| H | -1.167508 | -0.113825 | -0.357375 |
| C | -2.606529 | 1.138596  | 0.650607  |
| C | -3.943557 | 1.299865  | 1.034948  |
| H | -4.236586 | 2.195557  | 1.577547  |
| C | -4.867930 | 0.305859  | 0.714241  |
| H | -5.908413 | 0.428637  | 1.010163  |
| C | -0.877977 | -3.177316 | 0.480622  |
| H | -0.946641 | -2.261229 | 1.086130  |
| H | -0.727393 | -4.000338 | 1.196015  |
| C | 2.874787  | -2.638539 | -0.600821 |
| C | 0.351142  | -3.088784 | -0.437854 |
| H | 0.190441  | -2.316394 | -1.204825 |
| H | 0.466505  | -4.039042 | -0.983732 |
| C | 4.170338  | -2.212132 | 0.117985  |
| H | 5.017421  | -2.317982 | -0.577792 |
| C | 1.648006  | -2.762702 | 0.317029  |
| H | 1.839078  | -3.536940 | 1.077625  |
| H | 1.499045  | -1.823775 | 0.869992  |
| H | 4.364267  | -2.917772 | 0.940688  |
| C | 4.160295  | -0.778987 | 0.684506  |
| H | 5.008088  | -0.659259 | 1.376075  |
| H | 3.257822  | -0.638237 | 1.293745  |

|   |          |           |           |
|---|----------|-----------|-----------|
| H | 3.048788 | -3.607024 | -1.094646 |
| H | 2.647878 | -1.927442 | -1.409790 |
| C | 4.241454 | 0.326578  | -0.381513 |
| H | 3.580403 | 0.092531  | -1.227981 |
| H | 5.262654 | 0.357523  | -0.789616 |
| C | 3.873966 | 1.736287  | 0.146144  |
| H | 4.197331 | 2.482290  | -0.592756 |
| H | 4.436250 | 1.937401  | 1.068931  |

Sum of electronic and zero-point Energies= -1044.468736  
Sum of electronic and thermal Energies= -1044.445296  
Sum of electronic and thermal Enthalpies= -1044.444352  
Sum of electronic and thermal Free Energies= -1044.521491

#### daec[n=4]-3-E2 (dmf)

|   |           |           |           |
|---|-----------|-----------|-----------|
| C | 1.716967  | 1.900509  | 0.619738  |
| H | 2.275888  | 1.798504  | 1.544919  |
| C | 2.412256  | 1.879467  | -0.602827 |
| C | 1.690773  | 2.051197  | -1.791182 |
| H | 2.212282  | 2.052873  | -2.746573 |
| C | 0.301724  | 2.215559  | -1.762238 |
| H | -0.265358 | 2.355427  | -2.680117 |
| C | -0.381657 | 2.204761  | -0.551411 |
| O | -1.748303 | 2.433773  | -0.518114 |
| C | 0.324359  | 2.052588  | 0.661589  |
| O | -0.423335 | 2.072089  | 1.794694  |
| C | 0.245885  | 1.909243  | 3.044076  |
| H | 0.967645  | 2.718265  | 3.221769  |
| H | 0.760524  | 0.940251  | 3.100708  |
| H | -0.537244 | 1.949142  | 3.806527  |
| C | -4.487888 | -0.687743 | -0.162441 |
| H | -5.228791 | -1.481547 | -0.080533 |
| C | -3.196541 | -0.988834 | -0.622692 |
| C | -2.825956 | -2.410717 | -0.999291 |
| H | -2.048409 | -2.393276 | -1.774089 |
| H | -3.703302 | -2.895413 | -1.449341 |
| C | -2.356648 | -3.287517 | 0.187860  |
| H | -2.287134 | -4.327662 | -0.165557 |
| H | -3.140969 | -3.276664 | 0.959064  |
| C | -2.257551 | 0.050034  | -0.731163 |
| H | -1.258663 | -0.163227 | -1.102572 |
| C | -2.606813 | 1.360464  | -0.385818 |
| C | -3.897832 | 1.656343  | 0.065581  |
| H | -4.150318 | 2.682494  | 0.321913  |
| C | -4.831619 | 0.625017  | 0.175164  |
| H | -5.837975 | 0.850352  | 0.524052  |
| C | -1.017541 | -2.882989 | 0.827405  |
| H | -1.065377 | -1.829715 | 1.143105  |
| H | -0.882843 | -3.468375 | 1.749945  |
| C | 2.751085  | -2.759555 | -0.321145 |
| C | 0.212408  | -3.086957 | -0.071189 |
| H | 0.078437  | -2.543248 | -1.018265 |
| H | 0.294519  | -4.152242 | -0.340785 |
| C | 4.057724  | -2.219546 | 0.294080  |
| H | 4.905365  | -2.518537 | -0.342232 |
| C | 1.517918  | -2.614775 | 0.584734  |
| H | 1.685223  | -3.174655 | 1.519102  |
| H | 1.393835  | -1.562451 | 0.879141  |
| H | 4.218497  | -2.713809 | 1.264745  |
| C | 4.095990  | -0.692782 | 0.500013  |
| H | 4.928320  | -0.439441 | 1.173995  |
| H | 3.184135  | -0.378267 | 1.023625  |
| H | 2.890602  | -3.823939 | -0.565607 |
| H | 2.555005  | -2.255328 | -1.279876 |
| C | 4.256914  | 0.119121  | -0.796731 |
| H | 3.630750  | -0.303403 | -1.595218 |
| H | 5.296768  | 0.031886  | -1.145022 |
| C | 3.906226  | 1.621857  | -0.648120 |
| H | 4.333442  | 2.167183  | -1.500410 |
| H | 4.387147  | 2.019440  | 0.257004  |

Sum of electronic and zero-point Energies= -1044.468757

Sum of electronic and thermal Energies= -1044.445217  
Sum of electronic and thermal Enthalpies= -1044.444272  
Sum of electronic and thermal Free Energies= -1044.521895

#### daec[n=4]-4-TS (dmf)

|   |           |           |           |
|---|-----------|-----------|-----------|
| C | -1.273835 | -3.183586 | 0.012900  |
| H | -1.542496 | -4.234036 | -0.062425 |
| C | 0.087377  | -2.818186 | -0.051099 |
| C | 0.382758  | -1.464784 | 0.062815  |
| H | 1.402818  | -1.115918 | 0.068184  |
| C | -0.615550 | -0.504623 | 0.181879  |
| H | -0.313338 | 0.528673  | 0.211058  |
| C | -1.955906 | -0.853094 | 0.255193  |
| O | -2.990087 | 0.065759  | 0.401642  |
| C | -2.293151 | -2.228711 | 0.179505  |
| O | -3.619753 | -2.521798 | 0.267704  |
| C | -4.011438 | -3.888884 | 0.187914  |
| H | -5.101216 | -3.891449 | 0.284081  |
| H | -3.573919 | -4.482885 | 1.002693  |
| C | -3.731742 | -4.334219 | -0.777345 |
| C | -1.977452 | 3.961864  | -0.712892 |
| H | -1.656935 | 4.933771  | -1.085108 |
| C | -1.281150 | 3.357182  | 0.343827  |
| C | 0.062704  | 3.868522  | 0.837008  |
| H | 0.171709  | 3.659331  | 1.910713  |
| H | 0.146461  | 4.955507  | 0.704500  |
| C | 1.195747  | 3.141771  | 0.057570  |
| H | 1.192636  | 3.496890  | -0.984246 |
| H | 0.937079  | 2.078442  | 0.010311  |
| C | -1.734589 | 2.114074  | 0.813935  |
| H | -1.239347 | 1.656180  | 1.665697  |
| C | -2.710054 | 1.399317  | 0.111813  |
| C | -3.404657 | 2.005307  | -0.938845 |
| H | -4.180550 | 1.451372  | -1.461791 |
| C | -3.058076 | 3.306714  | -1.316132 |
| H | -3.599028 | 3.789674  | -2.127833 |
| C | 2.613031  | 3.261561  | 0.639990  |
| H | 2.949100  | 4.308190  | 0.586375  |
| H | 2.588617  | 3.001601  | 1.710254  |
| C | 4.556159  | -0.043642 | -0.463029 |
| C | 3.656520  | 2.362451  | -0.068692 |
| H | 4.656081  | 2.636344  | 0.302579  |
| H | 3.660295  | 2.589151  | -1.146877 |
| C | 4.464772  | -1.539783 | -0.071898 |
| H | 4.322453  | -1.592067 | 1.018324  |
| C | 3.450952  | 0.847960  | 0.139976  |
| H | 2.481985  | 0.554814  | -0.281669 |
| H | 3.390139  | 0.648332  | 1.222202  |
| H | 5.441466  | -2.007355 | -0.261562 |
| C | 3.355811  | -2.376322 | -0.774867 |
| H | 3.799962  | -2.960595 | -1.593676 |
| H | 2.645095  | -1.702148 | -1.264737 |
| H | 5.532189  | 0.336276  | -0.122917 |
| H | 4.558309  | 0.056499  | -1.560103 |
| C | 2.612409  | -3.345658 | 0.184619  |
| H | 3.248271  | -4.228108 | 0.344468  |
| H | 2.514346  | -2.870286 | 1.171285  |
| C | 1.207473  | -3.833780 | -0.250852 |
| H | 0.962387  | -4.747912 | 0.308643  |
| H | 1.236746  | -4.139765 | -1.309676 |

Sum of electronic and zero-point Energies= -1044.439903  
Sum of electronic and thermal Energies= -1044.417155  
Sum of electronic and thermal Enthalpies= -1044.416211  
Sum of electronic and thermal Free Energies= -1044.491128

#### daec[n=4]-4-E1 (dmf)

|   |           |           |           |
|---|-----------|-----------|-----------|
| C | -0.932308 | -2.384350 | 0.768082  |
| H | -1.415988 | -2.368554 | 1.740417  |
| C | -1.719076 | -2.592176 | -0.378560 |
| C | -1.088475 | -2.636591 | -1.628393 |

|   |           |           |           |
|---|-----------|-----------|-----------|
| H | -1.674525 | -2.813511 | -2.528453 |
| C | 0.293624  | -2.439286 | -1.733090 |
| H | 0.790982  | -2.461750 | -2.700460 |
| C | 1.060092  | -2.204200 | -0.596678 |
| O | 2.433842  | -2.047706 | -0.706371 |
| C | 0.452071  | -2.193233 | 0.677870  |
| O | 1.279476  | -1.987653 | 1.734586  |
| C | 0.704930  | -1.946775 | 3.039771  |
| H | 1.538975  | -1.770858 | 3.724998  |
| H | 0.219378  | -2.898818 | 3.294339  |
| H | -0.022241 | -1.128559 | 3.133245  |
| C | 4.166402  | 1.698354  | -0.098346 |
| H | 4.639866  | 2.664549  | 0.067798  |
| C | 2.813575  | 1.640643  | -0.459082 |
| C | 1.977737  | 2.895929  | -0.640268 |
| H | 1.640615  | 2.949666  | -1.687283 |
| H | 2.603217  | 3.782929  | -0.470710 |
| C | 0.732998  | 2.940002  | 0.269203  |
| H | 1.048858  | 3.012025  | 1.320905  |
| H | 0.209182  | 1.980418  | 0.178563  |
| C | 2.224658  | 0.381903  | -0.67625  |
| H | 1.181171  | 0.314711  | -0.963090 |
| C | 2.966234  | -0.788839 | -0.499985 |
| C | 4.321507  | -0.727553 | -0.152759 |
| H | 4.885592  | -1.649423 | -0.032789 |
| C | 4.911993  | 0.520906  | 0.043535  |
| H | 5.963721  | 0.576463  | 0.319274  |
| C | -0.245128 | 4.082810  | -0.057001 |
| H | 0.167876  | 5.034657  | 0.308366  |
| H | -0.332286 | 4.188043  | -1.150160 |
| C | -3.767255 | 2.352953  | 0.453206  |
| C | -1.653427 | 3.860606  | 0.532751  |
| H | -2.220318 | 4.803275  | 0.498526  |
| H | -1.562955 | 3.596544  | 1.598618  |
| C | -4.376563 | 1.083261  | -0.177153 |
| H | -4.365214 | 1.189493  | -1.273855 |
| C | -2.439939 | 2.764214  | -0.204466 |
| H | -1.803873 | 1.874390  | -0.299556 |
| H | -2.639957 | 3.098743  | -1.234910 |
| H | -5.435623 | 0.996926  | 0.108525  |
| C | -3.637726 | -0.206735 | 0.221633  |
| H | -3.850115 | -0.430625 | 1.279290  |
| H | -2.554332 | -0.039138 | 0.162278  |
| H | -4.484461 | 3.184425  | 0.380063  |
| H | -3.608525 | 2.180242  | 1.529807  |
| C | -3.990002 | -1.424894 | -0.641975 |
| H | -5.069277 | -1.630597 | -0.576642 |
| H | -3.783787 | -1.190452 | -1.697449 |
| C | -3.226737 | -2.716324 | -0.257805 |
| H | -3.579827 | -3.531404 | -0.905223 |
| H | -3.487786 | -2.994686 | 0.772668  |

Sum of electronic and zero-point Energies= -1044.468600  
Sum of electronic and thermal Energies= -1044.445002  
Sum of electronic and thermal Enthalpies= -1044.444058  
Sum of electronic and thermal Free Energies= -1044.521606

#### daec[n=4]-4-E2 (dmf)

|   |           |           |           |
|---|-----------|-----------|-----------|
| C | -0.893579 | -2.709347 | -0.512067 |
| H | -1.409982 | -3.027653 | -1.413333 |
| C | -1.638724 | -2.509396 | 0.664576  |
| C | -0.968375 | -2.115266 | 1.828400  |
| H | -1.524771 | -1.968010 | 2.751893  |
| C | 0.413464  | -1.896136 | 1.810850  |
| H | 0.941043  | -1.581671 | 2.708983  |
| C | 1.138492  | -2.070600 | 0.637895  |
| O | 2.513683  | -1.882272 | 0.637771  |
| C | 0.490745  | -2.493426 | -0.542980 |
| O | 1.280821  | -2.650367 | -1.636009 |
| C | 0.664972  | -3.066833 | -2.853640 |
| H | 1.472762  | -3.126463 | -3.588610 |

|   |           |           |           |
|---|-----------|-----------|-----------|
| H | -0.084533 | -2.339505 | -3.194738 |
| H | 0.195196  | -4.054418 | -2.748654 |
| C | 4.127899  | 1.930692  | 0.139099  |
| H | 4.571367  | 2.918651  | 0.027443  |
| C | 2.779270  | 1.734210  | -0.185608 |
| C | 1.913180  | 2.865556  | -0.713136 |
| H | 1.619395  | 2.633052  | -1.748898 |
| H | 2.506312  | 3.789000  | -0.761342 |
| C | 0.630068  | 3.100315  | 0.108737  |
| H | 0.897993  | 3.443904  | 1.119212  |
| H | 0.126816  | 2.135126  | 0.244193  |
| C | 2.227082  | 0.450815  | -0.030885 |
| H | 1.185108  | 0.277772  | -0.283545 |
| C | 3.003689  | -0.606094 | 0.448697  |
| C | 4.355597  | -0.408251 | 0.760785  |
| H | 4.946530  | -1.243299 | 1.129652  |
| C | 4.907423  | 0.862244  | 0.600796  |
| H | 5.955550  | 1.023485  | 0.847135  |
| C | -0.353116 | 4.096313  | -0.533198 |
| H | 0.013380  | 5.122410  | -0.382540 |
| H | -0.374706 | 3.937668  | -1.623153 |
| C | -3.856508 | 2.396627  | 0.165623  |
| C | -1.789893 | 3.964522  | 0.013600  |
| H | -2.375271 | 4.852819  | -0.268104 |
| H | -1.759898 | 3.954257  | 1.114954  |
| C | -4.392060 | 0.995454  | -0.195689 |
| H | -4.306185 | 0.852497  | -1.284903 |
| C | -2.502091 | 2.700429  | -0.494891 |
| H | -1.838601 | 1.837561  | -0.350418 |
| H | -2.646857 | 2.785409  | -1.583723 |
| H | -5.466373 | 0.935572  | 0.034051  |
| C | -3.654822 | -0.143578 | 0.531633  |
| H | -3.952653 | -0.146226 | 1.592270  |
| H | -2.575143 | 0.056555  | 0.524418  |
| H | -4.588454 | 3.162388  | -0.132593 |
| H | -3.760589 | 2.475329  | 1.260428  |
| C | -3.895941 | -1.532442 | -0.074062 |
| H | -4.971766 | -1.764364 | -0.063698 |
| H | -3.593718 | -1.520538 | -1.132374 |
| C | -3.146846 | -2.677178 | 0.650038  |
| H | -3.408103 | -3.625909 | 0.159537  |
| H | -3.509436 | -2.746047 | 1.684929  |

Sum of electronic and zero-point Energies= -1044.468239  
Sum of electronic and thermal Energies= -1044.444525  
Sum of electronic and thermal Enthalpies= -1044.443580  
Sum of electronic and thermal Free Energies= -1044.522049

#### daec[n=5]-1-TS (dmf)

|   |           |           |           |
|---|-----------|-----------|-----------|
| C | 2.883731  | 2.009879  | -0.245555 |
| H | 3.808447  | 2.559330  | -0.093070 |
| C | 2.950767  | 0.632230  | -0.524697 |
| C | 1.747425  | -0.048352 | -0.717770 |
| H | 1.745056  | -1.102972 | -0.967799 |
| C | 0.517456  | 0.603376  | -0.601834 |
| H | -0.386569 | 0.022785  | -0.724046 |
| C | 0.452960  | 1.967916  | -0.333833 |
| O | -0.710010 | 2.710045  | -0.225990 |
| C | 1.659829  | 2.688503  | -0.160453 |
| O | 1.529562  | 4.018626  | 0.096004  |
| C | 2.716291  | 4.782858  | 0.287802  |
| H | 3.356924  | 4.766694  | -0.605217 |
| H | 2.381982  | 5.807897  | 0.473263  |
| H | 3.291389  | 4.427166  | 1.154324  |
| C | -4.402860 | 0.976468  | 0.659286  |
| H | -5.356406 | 0.524103  | 0.926401  |
| C | -3.700521 | 0.512322  | -0.464971 |
| C | -4.180667 | -0.683062 | -1.266843 |
| H | -3.504219 | -0.834227 | -2.117803 |
| H | -5.175186 | -0.480964 | -1.691573 |
| C | -4.280779 | -1.986329 | -0.432654 |

|   |           |           |           |
|---|-----------|-----------|-----------|
| H | -5.114310 | -1.876477 | 0.276063  |
| C | -3.030519 | -2.394305 | 0.369871  |
| H | -3.320476 | -3.213748 | 1.045490  |
| H | -2.735732 | -1.560869 | 1.024706  |
| C | -1.805607 | -2.855300 | -0.438548 |
| H | -1.504123 | -2.076790 | -1.155818 |
| H | -2.077679 | -3.737626 | -1.040031 |
| H | -4.567524 | -2.803065 | -1.112347 |
| C | -2.487557 | 1.130568  | -0.799421 |
| H | -1.970956 | 0.827232  | -1.704703 |
| C | -1.930720 | 2.108377  | 0.033701  |
| C | -2.631178 | 2.561844  | 1.154412  |
| H | -2.192699 | 3.333950  | 1.781807  |
| C | -3.879760 | 2.005426  | 1.446967  |
| H | -4.434693 | 2.361541  | 2.313031  |
| C | 1.777120  | -4.134514 | 0.705691  |
| C | -0.614562 | -3.198390 | 0.474858  |
| H | -0.297261 | -2.284114 | 0.999109  |
| H | -0.957923 | -3.891261 | 1.260155  |
| C | 2.640010  | -2.914202 | 1.096692  |
| H | 3.132451  | -3.113030 | 2.060663  |
| C | 0.590241  | -3.836191 | -0.237642 |
| H | 0.921268  | -3.192399 | -1.067003 |
| H | 0.261028  | -4.778060 | -0.702884 |
| H | 1.996176  | -2.040204 | 1.267021  |
| C | 3.733259  | -2.568404 | 0.067116  |
| H | 3.299860  | -2.525367 | -0.941778 |
| H | 4.441022  | -3.409954 | 0.039230  |
| H | 2.429264  | -4.889794 | 0.240434  |
| H | 1.379018  | -4.605908 | 1.617323  |
| C | 4.516698  | -1.257176 | 0.360553  |
| H | 4.302130  | -0.916317 | 1.384232  |
| H | 5.593128  | -1.476860 | 0.339865  |
| C | 4.289574  | -0.079105 | -0.621456 |
| H | 4.430008  | -0.456171 | -1.646818 |
| H | 5.086408  | 0.659490  | -0.459971 |

Sum of electronic and zero-point Energies= -1083.735336  
Sum of electronic and thermal Energies= -1083.711345  
Sum of electronic and thermal Enthalpies= -1083.710400  
Sum of electronic and thermal Free Energies= -1083.788320

daec[n=5]-1-E1 (dmf)

|   |           |           |           |
|---|-----------|-----------|-----------|
| C | 1.121463  | 2.473850  | -0.758375 |
| H | 1.575737  | 2.610576  | -1.735578 |
| C | 1.952054  | 2.420017  | 0.373498  |
| C | 1.363082  | 2.253695  | 1.634615  |
| H | 1.983637  | 2.223139  | 2.527872  |
| C | -0.022756 | 2.128383  | 1.756408  |
| H | -0.490895 | 2.003907  | 2.730565  |
| C | -0.839079 | 2.177353  | 0.630288  |
| O | -2.214340 | 2.158647  | 0.798883  |
| C | -0.273164 | 2.365332  | -0.647498 |
| O | -1.145157 | 2.425935  | -1.686700 |
| C | -0.615732 | 2.600938  | -3.000123 |
| H | 0.044011  | 1.768870  | -3.281789 |
| H | -1.481623 | 2.618885  | -3.667993 |
| H | -0.067979 | 3.549018  | -3.088926 |
| C | -4.585310 | -1.198977 | 0.128828  |
| H | -5.232790 | -2.057333 | -0.043035 |
| C | -3.237228 | -1.260941 | -0.256256 |
| C | -2.692577 | -2.519876 | -0.904371 |
| H | -1.937253 | -2.252168 | -1.654823 |
| H | -3.511768 | -3.007156 | -1.450088 |
| C | -2.098605 | -3.555357 | 0.083983  |
| H | -2.819642 | -3.713193 | 0.899431  |
| C | -0.723102 | -3.204141 | 0.677987  |
| H | -0.493118 | -3.932422 | 1.470966  |
| H | -0.768884 | -2.222166 | 1.172964  |
| C | 0.419279  | -3.209845 | -0.349176 |
| H | 0.215159  | -2.467372 | -1.135211 |

|   |           |           |           |
|---|-----------|-----------|-----------|
| H | 0.443232  | -4.187822 | -0.856537 |
| H | -2.016721 | -4.517799 | -0.443637 |
| C | -2.415550 | -0.141753 | -0.036436 |
| H | -1.371984 | -0.171521 | -0.336762 |
| C | -2.941398 | 1.014734  | 0.550105  |
| C | -4.289267 | 1.071972  | 0.926471  |
| H | -4.675743 | 1.982977  | 1.377199  |
| C | -5.103486 | -0.039767 | 0.714250  |
| H | -6.152117 | 0.001941  | 1.003757  |
| C | 4.317204  | -2.536510 | -0.296118 |
| C | 1.802042  | -2.915628 | 0.250824  |
| H | 1.751875  | -1.973814 | 0.817239  |
| H | 2.064039  | -3.698325 | 0.980923  |
| C | 4.477376  | -1.257477 | 0.547129  |
| H | 5.542357  | -1.140563 | 0.802004  |
| C | 2.897598  | -2.819305 | -0.821893 |
| H | 2.614476  | -2.040512 | -1.545977 |
| H | 2.921882  | -3.760786 | -1.392588 |
| H | 3.952659  | -1.380385 | 1.506668  |
| C | 3.971555  | 0.027234  | -0.124663 |
| H | 2.893514  | -0.064507 | -0.315534 |
| H | 4.446719  | 0.148183  | -1.111423 |
| H | 4.998606  | -2.482996 | -1.159575 |
| H | 4.657070  | -3.394259 | 0.305087  |
| C | 4.224804  | 1.283276  | 0.721738  |
| H | 3.944930  | 1.080927  | 1.766331  |
| H | 5.301315  | 1.509538  | 0.733775  |
| C | 3.460608  | 2.534477  | 0.235891  |
| H | 3.717310  | 2.739203  | -0.812583 |
| H | 3.809128  | 3.401174  | 0.817180  |

Sum of electronic and zero-point Energies= -1083.753372  
Sum of electronic and thermal Energies= -1083.728522  
Sum of electronic and thermal Enthalpies= -1083.727578  
Sum of electronic and thermal Free Energies= -1083.808406

daec[n=5]-1-E2 (dmf)

|   |           |           |           |
|---|-----------|-----------|-----------|
| C | 1.225533  | 2.308242  | 0.634302  |
| H | 1.725073  | 2.318068  | 1.598513  |
| C | 1.998843  | 2.392813  | -0.539717 |
| C | 1.344499  | 2.400594  | -1.775608 |
| H | 1.922729  | 2.466274  | -2.695197 |
| C | -0.053642 | 2.327815  | -1.842272 |
| H | -0.570171 | 2.346994  | -2.799522 |
| C | -0.808725 | 2.238035  | -0.679990 |
| O | -2.191483 | 2.277084  | -0.746601 |
| C | -0.169404 | 2.225547  | 0.581348  |
| O | -0.987268 | 2.145536  | 1.662148  |
| C | -0.388471 | 2.107231  | 2.956392  |
| H | 0.176928  | 3.025988  | 3.164386  |
| H | -1.218187 | 2.024668  | 3.664124  |
| H | 0.273219  | 1.237223  | 3.066871  |
| C | -4.572992 | -1.069417 | -0.054789 |
| H | -5.224722 | -1.926657 | 0.106773  |
| C | -3.268987 | -1.272406 | -0.534651 |
| C | -2.779734 | -2.677517 | -0.830430 |
| H | -2.031256 | -2.645989 | -1.632751 |
| H | -3.624922 | -3.263227 | -1.217322 |
| C | -2.201441 | -3.431859 | 0.392364  |
| H | -2.927719 | -3.370041 | 1.216120  |
| C | -0.827262 | -2.949981 | 0.888149  |
| H | -0.604358 | -3.462678 | 1.836647  |
| H | -0.871909 | -1.876329 | 1.127245  |
| C | 0.323121  | -3.207317 | -0.097206 |
| H | 0.144353  | -2.652637 | -1.030548 |
| H | 0.330470  | -4.273660 | -0.375136 |
| H | -2.126709 | -4.497737 | 0.128287  |
| C | -2.445175 | -0.154827 | -0.747453 |
| H | -1.438676 | -0.288139 | -1.136989 |
| C | -2.924064 | 1.134647  | -0.489106 |
| C | -4.226901 | 1.331396  | -0.020332 |

|   |           |           |           |
|---|-----------|-----------|-----------|
| H | -4.578428 | 2.343433  | 0.165457  |
| C | -5.045072 | 0.221849  | 0.196513  |
| H | -6.060734 | 0.368323  | 0.560091  |
| C | 4.237369  | -2.625009 | -0.097021 |
| C | 1.703674  | -2.815690 | 0.449832  |
| H | 1.662020  | -1.776470 | 0.808527  |
| H | 1.940187  | -3.433931 | 1.330884  |
| C | 4.415283  | -1.228676 | 0.528030  |
| H | 5.473755  | -1.101894 | 0.804157  |
| C | 2.818724  | -2.957618 | -0.597292 |
| H | 2.574986  | -2.320778 | -1.460946 |
| H | 2.821073  | -3.990053 | -0.980355 |
| H | 3.852437  | -1.176452 | 1.472269  |
| C | 3.979816  | -0.059230 | -0.366216 |
| H | 2.919941  | -0.178327 | -0.629234 |
| H | 4.535190  | -0.086360 | -1.317518 |
| H | 4.935646  | -2.733032 | -0.941661 |
| H | 4.542189  | -3.378257 | 0.646191  |
| C | 4.174952  | 1.307856  | 0.304439  |
| H | 3.774322  | 1.268248  | 1.328368  |
| H | 5.249413  | 1.520177  | 0.408344  |
| C | 3.512914  | 2.481379  | -0.448694 |
| H | 3.927679  | 2.547473  | -1.464054 |
| H | 3.789038  | 3.417675  | 0.060047  |

Sum of electronic and zero-point Energies= -1083.753882  
Sum of electronic and thermal Energies= -1083.729080  
Sum of electronic and thermal Enthalpies= -1083.728136  
Sum of electronic and thermal Free Energies= -1083.808644

daec[n=5]-2-TS (dmf)

|   |           |           |           |
|---|-----------|-----------|-----------|
| C | -2.964864 | -1.925667 | -0.187401 |
| H | -3.918369 | -2.400747 | 0.025561  |
| C | -2.942910 | -0.547837 | -0.473018 |
| C | -1.703717 | 0.038737  | -0.741887 |
| H | -1.629866 | 1.090863  | -0.992776 |
| C | -0.525728 | -0.709780 | -0.701112 |
| H | 0.413628  | -0.208348 | -0.893416 |
| C | -0.549609 | -2.071349 | -0.413584 |
| O | 0.571944  | -2.885403 | -0.372122 |
| C | -1.793317 | -2.696615 | -0.161601 |
| O | -1.750595 | -4.029800 | 0.107347  |
| C | -2.979795 | -4.697192 | 0.378278  |
| H | -3.476090 | -4.285884 | 1.268625  |
| H | -2.715100 | -5.742451 | 0.563339  |
| H | -3.666602 | -4.643426 | -0.478172 |
| C | 4.225393  | -1.244971 | 0.805102  |
| H | 5.162681  | -0.804713 | 1.142096  |
| C | 3.666483  | -0.836775 | -0.416738 |
| C | 4.268672  | 0.300893  | -1.216899 |
| H | 3.860046  | 0.286395  | -2.236625 |
| H | 5.355986  | 0.166313  | -1.305977 |
| C | 4.004536  | 1.688312  | -0.576548 |
| H | 4.514644  | 1.726904  | 0.397941  |
| C | 2.522717  | 2.048547  | -0.373177 |
| H | 2.044481  | 1.273787  | 0.243125  |
| H | 2.002878  | 2.035011  | -1.343405 |
| C | 2.331639  | 3.410478  | 0.317139  |
| H | 2.655013  | 4.218399  | -0.358657 |
| H | 3.011053  | 3.452590  | 1.182806  |
| H | 4.486895  | 2.451668  | -1.205701 |
| C | 2.471955  | -1.436414 | -0.839788 |
| H | 2.053178  | -1.171917 | -1.807003 |
| C | 1.794542  | -2.335204 | -0.009366 |
| C | 2.352084  | -2.736140 | 1.206735  |
| H | 1.819116  | -3.449707 | 1.830297  |
| C | 3.583605  | -2.201201 | 1.597057  |
| H | 4.031004  | -2.515784 | 2.538151  |
| C | -1.522259 | 4.395227  | 0.333060  |
| C | 0.906284  | 3.704656  | 0.825137  |
| H | 0.578487  | 2.872221  | 1.467343  |

|   |           |           |           |
|---|-----------|-----------|-----------|
| H | 0.954673  | 4.588572  | 1.480501  |
| C | -2.371646 | 3.234366  | 0.909861  |
| H | -2.842377 | 3.545496  | 1.854147  |
| C | -0.154910 | 3.980463  | -0.254376 |
| H | -0.281221 | 3.101343  | -0.904664 |
| H | 0.213325  | 4.789826  | -0.904108 |
| H | -1.719233 | 2.387972  | 1.169055  |
| C | -3.480643 | 2.749774  | -0.043387 |
| H | -3.053240 | 2.562564  | -1.037841 |
| H | -4.188382 | 3.578738  | -0.190688 |
| H | -2.106956 | 4.909012  | -0.444823 |
| H | -1.342231 | 5.149612  | 1.113587  |
| C | -4.255891 | 1.495613  | 0.453403  |
| H | -5.310080 | 1.765633  | 0.604146  |
| H | -3.882237 | 1.194233  | 1.442823  |
| C | -4.230686 | 0.260201  | -0.482398 |
| H | -5.056532 | -0.406491 | -0.200044 |
| H | -4.450979 | 0.595226  | -1.508398 |

Sum of electronic and zero-point Energies= -1083.734601  
Sum of electronic and thermal Energies= -1083.710463  
Sum of electronic and thermal Enthalpies= -1083.709518  
Sum of electronic and thermal Free Energies= -1083.788414

daec[n=5]-2-E1 (dmf)

|   |           |           |           |
|---|-----------|-----------|-----------|
| C | -0.730132 | -2.709329 | -0.698731 |
| H | -1.145371 | -2.991541 | -1.662006 |
| C | -1.593381 | -2.596139 | 0.403728  |
| C | -1.054947 | -2.239202 | 1.647924  |
| H | -1.698860 | -2.159881 | 2.521201  |
| C | 0.311672  | -1.981323 | 1.777616  |
| H | 0.740249  | -1.703318 | 2.738232  |
| C | 1.159099  | -2.086141 | 0.678546  |
| O | 2.522364  | -1.900638 | 0.854818  |
| C | 0.646903  | -2.468110 | -0.577648 |
| O | 1.546964  | -2.563176 | -1.590264 |
| C | 1.068665  | -2.935284 | -2.881997 |
| H | 0.608658  | -3.932810 | -2.867670 |
| H | 1.949661  | -2.952020 | -3.529869 |
| H | 0.345856  | -2.204249 | -3.269517 |
| C | 4.358521  | 1.786701  | 0.228861  |
| H | 4.864902  | 2.738116  | 0.074526  |
| C | 3.098393  | 1.571602  | -0.349374 |
| C | 2.448718  | 2.654563  | -1.190502 |
| H | 1.985065  | 2.201069  | -2.079001 |
| H | 3.237969  | 3.323948  | -1.557925 |
| C | 1.383417  | 3.513931  | -0.467607 |
| H | 1.799127  | 3.892910  | 0.478550  |
| C | 0.048881  | 2.800913  | -0.208028 |
| H | 0.200897  | 1.951511  | 0.474346  |
| H | -0.306163 | 2.372710  | -1.157114 |
| C | -1.028060 | 3.727840  | 0.377585  |
| H | -1.163570 | 4.594104  | -0.290070 |
| H | -0.664451 | 4.134867  | 1.333881  |
| H | 1.191385  | 4.397780  | -1.094756 |
| C | 2.462582  | 0.334822  | -0.146298 |
| H | 1.493396  | 0.147639  | -0.598444 |
| C | 3.078425  | -0.660160 | 0.619597  |
| C | 4.340986  | -0.443245 | 1.185445  |
| H | 4.803606  | -1.233173 | 1.772391  |
| C | 4.973102  | 0.783666  | 0.985721  |
| H | 5.954229  | 0.957647  | 1.424272  |
| C | -4.530110 | 2.059358  | -0.469653 |
| C | -2.392598 | 3.052338  | 0.610350  |
| H | -2.250857 | 2.176714  | 1.261757  |
| H | -3.039731 | 3.745951  | 1.170150  |
| C | -4.616382 | 0.776677  | 0.378671  |
| H | -5.675395 | 0.484213  | 0.454756  |
| C | -3.117330 | 2.635872  | -0.680072 |
| H | -2.507165 | 1.908461  | -1.232768 |
| H | -3.199824 | 3.517112  | -1.335815 |

|                                                           |           |           |           |
|-----------------------------------------------------------|-----------|-----------|-----------|
| H                                                         | -4.290796 | 0.989455  | 1.408151  |
| C                                                         | -3.806342 | -0.410409 | -0.162807 |
| H                                                         | -2.740269 | -0.145688 | -0.191218 |
| H                                                         | -4.099121 | -0.614636 | -1.205502 |
| H                                                         | -4.973921 | 1.860222  | -1.457740 |
| H                                                         | -5.163687 | 2.829606  | -0.002355 |
| C                                                         | -3.984595 | -1.683769 | 0.675588  |
| H                                                         | -5.032535 | -2.014843 | 0.621564  |
| H                                                         | -3.794627 | -1.450726 | 1.733842  |
| C                                                         | -3.081346 | -2.859903 | 0.246526  |
| H                                                         | -3.355146 | -3.741117 | 0.846503  |
| H                                                         | -3.292986 | -3.121140 | -0.799438 |
| Sum of electronic and zero-point Energies= -1083.753316   |           |           |           |
| Sum of electronic and thermal Energies= -1083.728390      |           |           |           |
| Sum of electronic and thermal Enthalpies= -1083.727446    |           |           |           |
| Sum of electronic and thermal Free Energies= -1083.808800 |           |           |           |

daec[n=5]-2-E2 (dmf)

|   |           |           |           |
|---|-----------|-----------|-----------|
| C | -1.013905 | -2.379080 | 0.607997  |
| H | -1.569457 | -2.362807 | 1.540790  |
| C | -1.708604 | -2.566686 | -0.602325 |
| C | -0.980071 | -2.607209 | -1.795429 |
| H | -1.497041 | -2.753863 | -2.741792 |
| C | 0.413578  | -2.459101 | -1.785597 |
| H | 0.987255  | -2.495828 | -2.709193 |
| C | 1.089514  | -2.258479 | -0.589116 |
| O | 2.473166  | -2.185700 | -0.571313 |
| C | 0.375214  | -2.219793 | 0.630675  |
| O | 1.119934  | -2.033839 | 1.750749  |
| C | 0.442549  | -1.961074 | 3.003913  |
| H | -0.268831 | -1.124042 | 3.027788  |
| H | 1.222394  | -1.796221 | 3.752775  |
| H | -0.086381 | -2.897253 | 3.229587  |
| C | 4.430861  | 1.443148  | 0.034044  |
| H | 4.969625  | 2.377264  | 0.185132  |
| C | 3.194361  | 1.457289  | -0.630308 |
| C | 2.614225  | 2.762028  | -1.142573 |
| H | 2.110932  | 2.587243  | -2.104616 |
| H | 3.442843  | 3.454432  | -1.343656 |
| C | 1.619096  | 3.463596  | -0.187589 |
| H | 2.080757  | 3.570937  | 0.805919  |
| C | 0.254974  | 2.771603  | -0.059637 |
| H | 0.381322  | 1.767492  | 0.372379  |
| H | -0.156741 | 2.622038  | -1.068764 |
| C | -0.743943 | 3.565977  | 0.796425  |
| H | -0.866505 | 4.574091  | 0.368428  |
| H | -0.313604 | 3.711962  | 1.799428  |
| H | 1.461289  | 4.485244  | -0.565389 |
| C | 2.518920  | 0.240871  | -0.822995 |
| H | 1.570206  | 0.225678  | -1.353357 |
| C | 3.070647  | -0.956784 | -0.356992 |
| C | 4.308948  | -0.967133 | 0.292708  |
| H | 4.721527  | -1.911641 | 0.638779  |
| C | 4.982186  | 0.239929  | 0.485836  |
| H | 5.945873  | 0.240529  | 0.992246  |
| C | -4.369837 | 2.299599  | -0.208375 |
| C | -2.128694 | 2.908140  | 0.941902  |
| H | -2.001903 | 1.900879  | 1.366926  |
| H | -2.713812 | 3.478266  | 1.680811  |
| C | -4.505399 | 0.874533  | 0.359668  |
| H | -5.577193 | 0.635890  | 0.443659  |
| C | -2.931576 | 2.828307  | -0.366921 |
| H | -2.393650 | 2.208184  | -1.097035 |
| H | -2.983182 | 3.835708  | -0.809535 |
| H | -4.112318 | 0.847110  | 1.387259  |
| C | -3.811973 | -0.218498 | -0.466609 |
| H | -2.737963 | 0.001161  | -0.540019 |
| H | -4.198416 | -0.204819 | -1.498613 |
| H | -4.865006 | 2.338549  | -1.191340 |
| H | -4.932060 | 2.988198  | 0.441851  |

|                                                           |           |           |           |
|-----------------------------------------------------------|-----------|-----------|-----------|
| C                                                         | -3.996151 | -1.620309 | 0.130833  |
| H                                                         | -5.064071 | -1.885293 | 0.124598  |
| H                                                         | -3.696782 | -1.603492 | 1.189323  |
| C                                                         | -3.218780 | -2.734493 | -0.601037 |
| H                                                         | -3.473561 | -3.696567 | -0.129887 |
| H                                                         | -3.567189 | -2.801000 | -1.640968 |
| Sum of electronic and zero-point Energies= -1083.753833   |           |           |           |
| Sum of electronic and thermal Energies= -1083.728999      |           |           |           |
| Sum of electronic and thermal Enthalpies= -1083.728055    |           |           |           |
| Sum of electronic and thermal Free Energies= -1083.809014 |           |           |           |

daec[n=5]-3-TS (dmf)

|   |           |           |           |
|---|-----------|-----------|-----------|
| C | 1.670452  | 2.835615  | 0.228581  |
| H | 2.238031  | 3.660088  | 0.651032  |
| C | 2.278676  | 1.569096  | 0.139173  |
| C | 1.527790  | 0.528200  | -0.413732 |
| H | 1.937078  | -0.466412 | -0.504000 |
| C | 0.216340  | 0.731406  | -0.836546 |
| H | -0.328217 | -0.102148 | -1.260461 |
| C | -0.403747 | 1.966527  | -0.690401 |
| O | -1.734688 | 2.174976  | -1.042420 |
| C | 0.338802  | 3.049281  | -0.168163 |
| O | -0.314854 | 4.238044  | -0.071019 |
| C | 0.393236  | 5.349910  | 0.470441  |
| H | 0.707417  | 5.163140  | 1.506960  |
| H | -0.310788 | 6.187030  | 0.451924  |
| H | 1.273453  | 5.603129  | -0.136800 |
| C | -4.397606 | -0.502994 | 0.751692  |
| H | -5.066516 | -1.199855 | 1.254280  |
| C | -3.623907 | -0.940787 | -0.336433 |
| C | -3.612519 | -2.392250 | -0.778625 |
| H | -3.038047 | -2.477148 | -1.710182 |
| H | -4.635842 | -2.721667 | -1.011715 |
| C | -3.040530 | -3.364332 | 0.285258  |
| H | -3.720511 | -3.361103 | 1.149656  |
| C | -1.614932 | -3.087836 | 0.803246  |
| H | -1.449625 | -3.743529 | 1.672233  |
| H | -1.560147 | -2.059743 | 1.191652  |
| C | -0.461166 | -3.312810 | -0.190382 |
| H | -0.545756 | -2.612080 | -1.035057 |
| H | -0.542144 | -4.323438 | -0.622143 |
| H | -3.085353 | -4.382433 | -0.130615 |
| C | -2.792980 | -0.011752 | -0.976453 |
| H | -2.235968 | -0.315465 | -1.857680 |
| C | -2.649256 | 1.286844  | -0.476196 |
| C | -3.418620 | 1.716984  | 0.605700  |
| H | -3.303233 | 2.732683  | 0.975838  |
| C | -4.310221 | 0.817628  | 1.201201  |
| H | -4.920772 | 1.145270  | 2.040753  |
| C | 3.501664  | -3.256370 | 0.191535  |
| C | 0.920171  | -3.150713 | 0.474003  |
| H | 0.975158  | -2.153891 | 0.935145  |
| H | 1.002328  | -3.872920 | 1.302366  |
| C | 3.951518  | -1.850337 | 0.648281  |
| H | 4.788654  | -1.959175 | 1.354857  |
| C | 2.111832  | -3.352201 | -0.479203 |
| H | 2.023925  | -4.348197 | -0.940505 |
| H | 2.044459  | -2.633733 | -1.310477 |
| H | 3.140976  | -1.380615 | 1.221874  |
| C | 4.398159  | -0.928203 | -0.501953 |
| H | 3.658491  | -0.951942 | -1.311704 |
| H | 5.316498  | -1.345638 | -0.943318 |
| H | 4.256139  | -3.657540 | -0.503135 |
| H | 3.508499  | -3.929316 | 1.062928  |
| C | 4.699760  | 0.539926  | -0.116911 |
| H | 4.909660  | 1.099022  | -1.040986 |
| H | 5.633992  | 0.557708  | 0.464739  |
| C | 3.662545  | 1.329607  | 0.722097  |
| H | 3.539998  | 0.820129  | 1.690530  |
| H | 4.111733  | 2.302994  | 0.962260  |



Sum of electronic and zero-point Energies= -1083.733893  
Sum of electronic and thermal Energies= -1083.710201  
Sum of electronic and thermal Enthalpies= -1083.709257  
Sum of electronic and thermal Free Energies= -1083.785783

daec[n=5]-3-E1 (dmf)

|   |           |           |           |
|---|-----------|-----------|-----------|
| C | 1.685661  | 2.540519  | -0.111975 |
| H | 2.376666  | 3.054616  | -0.773682 |
| C | 2.200102  | 1.705308  | 0.896672  |
| C | 1.302130  | 1.054943  | 1.750694  |
| H | 1.677020  | 0.416835  | 2.548483  |
| C | -0.078345 | 1.234998  | 1.605059  |
| H | -0.775320 | 0.742683  | 2.279741  |
| C | -0.578575 | 2.052326  | 0.596580  |
| O | -1.931908 | 2.314521  | 0.475829  |
| C | 0.306629  | 2.718964  | -0.279519 |
| O | -0.266421 | 3.501546  | -1.230583 |
| C | 0.593051  | 4.192406  | -2.134594 |
| H | 1.249374  | 4.898746  | -1.607321 |
| H | -0.068377 | 4.746480  | -2.806890 |
| H | 1.205560  | 3.494107  | -2.721676 |
| C | -4.749993 | -0.716461 | 0.004078  |
| H | -5.507864 | -1.488184 | -0.121468 |
| C | -3.456093 | -0.928121 | -0.500057 |
| C | -3.108883 | -2.230743 | -1.194029 |
| H | -2.317789 | -2.055735 | -1.934777 |
| H | -3.988920 | -2.577993 | -1.752527 |
| C | -2.678015 | -3.363834 | -0.229065 |
| H | -3.456236 | -3.478744 | 0.539675  |
| C | -1.313020 | -3.172009 | 0.455139  |
| H | -1.215506 | -3.923164 | 1.253906  |
| H | -1.284911 | -2.192891 | 0.956698  |
| C | -0.109097 | -3.299577 | -0.490627 |
| H | -0.209009 | -2.587049 | -1.323304 |
| H | -0.116638 | -4.302395 | -0.947508 |
| H | -2.664023 | -4.307351 | -0.795683 |
| C | -2.494753 | 0.081219  | -0.337992 |
| H | -1.493062 | -0.054958 | -0.738073 |
| C | -2.821067 | 1.269831  | 0.326575  |
| C | -4.112030 | 1.477273  | 0.822643  |
| H | -4.345663 | 2.411214  | 1.328113  |
| C | -5.072626 | 0.478004  | 0.653431  |
| H | -6.080379 | 0.634879  | 1.034062  |
| C | 3.818028  | -2.982780 | -0.127832 |
| C | 1.243397  | -3.062386 | 0.197307  |
| H | 1.245501  | -2.053640 | 0.636496  |
| H | 1.357348  | -3.763578 | 1.039963  |
| C | 4.077867  | -1.566587 | 0.421406  |
| H | 5.097267  | -1.542274 | 0.838227  |
| C | 2.434064  | -3.219751 | -0.760240 |
| H | 2.416832  | -4.237593 | -1.180184 |
| H | 2.298791  | -2.541895 | -1.616482 |
| H | 3.403527  | -1.367865 | 1.266086  |
| C | 3.940528  | -0.450953 | -0.626347 |
| H | 2.893342  | -0.372947 | -0.951300 |
| H | 4.514808  | -0.731946 | -1.523261 |
| H | 4.586568  | -3.211523 | -0.882868 |
| H | 3.967438  | -3.708927 | 0.686663  |
| C | 4.428163  | 0.932435  | -0.163394 |
| H | 4.343647  | 1.634596  | -1.005753 |
| H | 5.500290  | 0.876942  | 0.079718  |
| C | 3.698847  | 1.529792  | 1.061342  |
| H | 3.885181  | 0.904467  | 1.943747  |
| H | 4.155371  | 2.507662  | 1.277667  |

Sum of electronic and zero-point Energies= -1083.752819  
Sum of electronic and thermal Energies= -1083.728080  
Sum of electronic and thermal Enthalpies= -1083.727136  
Sum of electronic and thermal Free Energies= -1083.807945

daec[n=5]-3-E2 (dmf)

|   |           |           |           |
|---|-----------|-----------|-----------|
| C | 1.341615  | 1.801188  | 0.972563  |
| H | 1.798984  | 1.476547  | 1.902637  |
| C | 2.172487  | 2.176522  | -0.097562 |
| C | 1.577617  | 2.616709  | -1.287248 |
| H | 2.196496  | 2.924511  | -2.127639 |
| C | 0.184697  | 2.669075  | -1.405365 |
| H | -0.286681 | 3.014763  | -2.322925 |
| C | -0.631115 | 2.295153  | -0.342001 |
| O | -2.001319 | 2.464265  | -0.448508 |
| C | -0.054682 | 1.862816  | 0.872236  |
| O | -0.920349 | 1.543009  | 1.868377  |
| C | -0.382936 | 1.107761  | 3.116473  |
| H | 0.205452  | 0.187374  | 3.002949  |
| H | -1.247102 | 0.908557  | 3.756444  |
| H | 0.240005  | 1.886345  | 3.577684  |
| C | -4.661522 | -0.741215 | -0.442399 |
| H | -5.378947 | -1.560366 | -0.444523 |
| C | -3.321791 | -0.993170 | -0.778494 |
| C | -2.871188 | -2.400720 | -1.117372 |
| H | -2.053347 | -2.361583 | -1.848851 |
| H | -3.702143 | -2.927270 | -1.606238 |
| C | -2.431643 | -3.237351 | 0.110928  |
| H | -3.230909 | -3.191896 | 0.865080  |
| C | -1.097646 | -2.820886 | 0.755921  |
| H | -1.000608 | -3.338555 | 1.722531  |
| H | -1.119716 | -1.745904 | 0.990269  |
| C | 0.137949  | -3.138712 | -0.100128 |
| H | 0.029411  | -2.686217 | -1.097363 |
| H | 0.187595  | -4.227016 | -0.266023 |
| H | -2.362555 | -4.290748 | -0.200666 |
| C | -2.412404 | 0.076747  | -0.780961 |
| H | -1.374897 | -0.093716 | -1.057637 |
| C | -2.835222 | 1.364729  | -0.436125 |
| C | -4.172938 | 1.612622  | -0.110477 |
| H | -4.480821 | 2.624019  | 0.143986  |
| C | -5.080321 | 0.552400  | -0.117432 |
| H | -6.123157 | 0.739313  | 0.133156  |
| C | 4.035085  | -2.526006 | 0.195977  |
| C | 1.460207  | -2.655067 | 0.513088  |
| H | 1.408010  | -1.564916 | 0.652214  |
| H | 1.582590  | -3.087155 | 1.519583  |
| C | 4.205484  | -0.998912 | 0.315123  |
| H | 5.218817  | -0.796230 | 0.696631  |
| C | 2.680068  | -3.014678 | -0.348336 |
| H | 2.725761  | -4.109656 | -0.455618 |
| H | 2.529133  | -2.622093 | -1.365177 |
| H | 3.514991  | -0.607599 | 1.075336  |
| C | 4.006598  | -0.239010 | -1.005705 |
| H | 2.955522  | -0.309185 | -1.319704 |
| H | 4.591313  | -0.736523 | -1.795482 |
| H | 4.830102  | -2.916503 | -0.458572 |
| H | 4.207694  | -2.977759 | 1.185488  |
| C | 4.422689  | 1.241331  | -0.967825 |
| H | 4.286529  | 1.670361  | -1.971231 |
| H | 5.499804  | 1.309921  | -0.751637 |
| C | 3.682091  | 2.124926  | 0.060677  |
| H | 3.921332  | 1.788008  | 1.077262  |
| H | 4.085613  | 3.145472  | -0.024267 |

Sum of electronic and zero-point Energies= -1083.753552  
Sum of electronic and thermal Energies= -1083.728809  
Sum of electronic and thermal Enthalpies= -1083.727864  
Sum of electronic and thermal Free Energies= -1083.808063

daec[n=5]-4-TS (dmf)

|   |          |           |           |
|---|----------|-----------|-----------|
| C | 1.966014 | 2.897906  | 0.024216  |
| H | 2.632141 | 3.691598  | -0.302726 |
| C | 2.483883 | 1.598862  | 0.184668  |
| C | 1.602050 | 0.598442  | 0.594960  |
| H | 1.942214 | -0.418147 | 0.738429  |
| C | 0.253885 | 0.869614  | 0.821333  |

|   |           |           |           |
|---|-----------|-----------|-----------|
| H | -0.387001 | 0.057008  | 1.132293  |
| C | -0.265933 | 2.145134  | 0.632888  |
| O | -1.606770 | 2.462643  | 0.824252  |
| C | 0.608164  | 3.186362  | 0.240382  |
| O | 0.045288  | 4.414026  | 0.077615  |
| C | 0.889251  | 5.489921  | -0.323072 |
| H | 0.240543  | 6.368740  | -0.383130 |
| H | 1.341191  | 5.304967  | -1.307842 |
| H | 1.684353  | 5.675565  | 0.412664  |
| C | -4.401258 | -0.126949 | -0.900663 |
| H | -5.098017 | -0.803392 | -1.393339 |
| C | -3.638133 | -0.580612 | 0.186710  |
| C | -3.602354 | -2.038019 | 0.603427  |
| H | -4.616063 | -2.446119 | 0.719124  |
| H | -3.116348 | -2.112249 | 1.585280  |
| C | -2.820187 | -2.899094 | -0.430896 |
| H | -3.515739 | -3.208756 | -1.222857 |
| C | -2.120289 | -4.139313 | 0.166139  |
| H | -2.023636 | -4.908425 | -0.615125 |
| H | -2.763623 | -4.578890 | 0.943369  |
| C | -0.717225 | -3.867954 | 0.753780  |
| H | -0.413479 | -4.737199 | 1.357052  |
| H | -0.764937 | -3.017237 | 1.452329  |
| H | -2.069772 | -2.268617 | -0.925663 |
| C | -2.769311 | 0.322876  | 0.814638  |
| H | -2.234666 | 0.006511  | 1.704358  |
| C | -2.557651 | 1.600181  | 0.286554  |
| C | -3.316244 | 2.047148  | -0.798102 |
| H | -3.153985 | 3.048904  | -1.188377 |
| C | -4.257565 | 1.183667  | -1.368414 |
| H | -4.858890 | 1.527532  | -2.208148 |
| C | 2.795672  | -3.042165 | -0.865632 |
| C | 0.361894  | -3.600802 | -0.311419 |
| H | 0.396346  | -4.457347 | -1.003987 |
| H | 0.070655  | -2.732254 | -0.921059 |
| C | 4.218734  | -2.665573 | -0.397869 |
| H | 4.896273  | -2.730593 | -1.263769 |
| C | 1.774839  | -3.349748 | 0.246389  |
| H | 2.110635  | -4.230304 | 0.817141  |
| H | 1.735742  | -2.520081 | 0.967121  |
| H | 4.570431  | -3.426509 | 0.316068  |
| C | 4.381482  | -1.271376 | 0.244674  |
| H | 5.387996  | -1.204087 | 0.684871  |
| H | 3.692182  | -1.178432 | 1.092670  |
| H | 2.394273  | -2.242094 | -1.505451 |
| H | 2.871615  | -3.927445 | -1.515777 |
| C | 4.207890  | -0.094775 | -0.743255 |
| H | 3.392000  | -0.305518 | -1.447580 |
| H | 5.120280  | -0.031984 | -1.353725 |
| C | 3.948341  | 1.292799  | -0.101587 |
| H | 4.337893  | 2.075952  | -0.765881 |
| H | 4.535547  | 1.376367  | 0.827647  |

Sum of electronic and zero-point Energies= -1083.732438

Sum of electronic and thermal Energies= -1083.708367

Sum of electronic and thermal Enthalpies= -1083.707423

Sum of electronic and thermal Free Energies= -1083.785681

daec[n=5]-4-E1 (dmf)

|   |           |          |           |
|---|-----------|----------|-----------|
| C | -1.290339 | 2.261369 | 0.818417  |
| H | -1.778980 | 2.149491 | 1.782168  |
| C | -2.083638 | 2.429970 | -0.332674 |
| C | -1.449909 | 2.593555 | -1.568538 |
| H | -2.043806 | 2.732725 | -2.469689 |
| C | -0.051186 | 2.584425 | -1.656440 |
| H | 0.450372  | 2.717040 | -2.612685 |
| C | 0.724086  | 2.414045 | -0.516606 |
| O | 2.104479  | 2.501194 | -0.603302 |
| C | 0.106197  | 2.251621 | 0.744698  |
| O | 0.942330  | 2.105187 | 1.804271  |
| C | 0.363439  | 1.913655 | 3.094168  |

|   |           |           |           |
|---|-----------|-----------|-----------|
| H | 1.205457  | 1.805209  | 3.783619  |
| H | -0.253478 | 1.005174  | 3.125909  |
| O | -0.243300 | 2.779015  | 3.394306  |
| C | 4.553755  | -0.862709 | -0.338725 |
| H | 5.216905  | -1.724229 | -0.280398 |
| C | 3.181344  | -1.054969 | -0.547542 |
| C | 2.581239  | -2.440602 | -0.672670 |
| H | 3.354602  | -3.154047 | -0.989325 |
| H | 1.822693  | -2.424721 | -1.466723 |
| C | 1.937148  | -2.944814 | 0.638699  |
| H | 2.733982  | -3.121607 | 1.375772  |
| C | 1.104094  | -4.229243 | 0.463328  |
| H | 0.894118  | -4.656693 | 1.455901  |
| H | 1.712643  | -4.977667 | -0.067200 |
| C | -0.227716 | -4.031503 | -0.287340 |
| H | -0.620587 | -5.014268 | -0.588569 |
| H | -0.042752 | -3.486414 | -1.225256 |
| H | 1.307754  | -2.148059 | 1.059515  |
| C | 2.341138  | 0.068309  | -0.626433 |
| H | 1.276575  | -0.067852 | -0.801262 |
| C | 2.865536  | 1.355959  | -0.494556 |
| C | 4.238505  | 1.545780  | -0.290332 |
| H | 4.628550  | 2.556520  | -0.196729 |
| C | 5.073586  | 0.431434  | -0.214044 |
| H | 6.141331  | 0.574416  | -0.056711 |
| C | -3.608199 | -2.144007 | 0.474594  |
| C | -1.306515 | -3.291695 | 0.521786  |
| H | -1.676457 | -3.952531 | 1.322031  |
| H | -0.864628 | -2.421176 | 1.029275  |
| C | -4.630314 | -1.381606 | -0.392462 |
| H | -5.565851 | -1.248299 | 0.172304  |
| C | -2.480649 | -2.802003 | -0.337342 |
| H | -2.897447 | -3.642192 | -0.915670 |
| H | -2.092095 | -2.088194 | -1.079828 |
| H | -4.889327 | -2.004277 | -1.262509 |
| C | -4.145430 | 0.000021  | -0.877080 |
| H | -4.759526 | 0.323263  | -1.731379 |
| H | -3.117154 | -0.081470 | -1.259135 |
| H | -3.170712 | -1.457446 | 1.215707  |
| H | -4.127019 | -2.921083 | 1.055901  |
| C | -4.212277 | 1.085066  | 0.208428  |
| H | -3.716056 | 0.735695  | 1.125225  |
| H | -5.266227 | 1.252082  | 0.477078  |
| C | -3.596042 | 2.440206  | -0.205680 |
| H | -3.883663 | 3.191407  | 0.544656  |
| H | -4.037521 | 2.765564  | -1.157959 |

Sum of electronic and zero-point Energies= -1083.753471

Sum of electronic and thermal Energies= -1083.728545

Sum of electronic and thermal Enthalpies= -1083.727600

Sum of electronic and thermal Free Energies= -1083.808878

daec[n=5]-4-E2 (dmf)

|   |           |           |           |
|---|-----------|-----------|-----------|
| C | -1.297478 | 2.539128  | -0.585667 |
| H | -1.801458 | 2.709097  | -1.532663 |
| C | -2.071727 | 2.356268  | 0.572523  |
| C | -1.418712 | 2.152306  | 1.795773  |
| H | -1.999238 | 2.021374  | 2.707104  |
| C | -0.022822 | 2.122696  | 1.857112  |
| H | 0.493884  | 1.972591  | 2.802763  |
| C | 0.737052  | 2.300885  | 0.705342  |
| O | 2.119240  | 2.359107  | 0.800586  |
| C | 0.104251  | 2.516461  | -0.536682 |
| O | 0.923795  | 2.689950  | -1.605129 |
| C | 0.325338  | 2.907655  | -2.882000 |
| H | 1.156908  | 3.016337  | -3.584013 |
| H | -0.279998 | 3.824382  | -2.890401 |
| H | -0.297561 | 2.054769  | -3.184701 |
| C | 4.548364  | -0.914720 | -0.074253 |
| H | 5.206067  | -1.753240 | -0.296985 |
| C | 3.161566  | -1.066309 | -0.201899 |

|   |           |           |           |
|---|-----------|-----------|-----------|
| C | 2.539340  | -2.380982 | -0.627469 |
| H | 3.295340  | -3.006654 | -1.121668 |
| H | 1.763366  | -2.174355 | -1.376721 |
| C | 1.918163  | -3.170518 | 0.546561  |
| H | 2.727842  | -3.505016 | 1.211568  |
| C | 1.085475  | -4.389790 | 0.105699  |
| H | 0.861273  | -5.003665 | 0.991751  |
| H | 1.701718  | -5.021011 | -0.553046 |
| C | -0.234788 | -4.049391 | -0.613307 |
| H | -0.636242 | -4.964818 | -1.073674 |
| H | -0.031828 | -3.363413 | -1.449352 |
| H | 1.296086  | -2.492130 | 1.146874  |
| C | 2.326867  | 0.027309  | 0.085837  |
| H | 1.249481  | -0.080859 | -0.009808 |
| C | 2.872419  | 1.247809  | 0.489074  |
| C | 4.260847  | 1.397643  | 0.612728  |
| H | 4.666662  | 2.356680  | 0.926051  |
| C | 5.088896  | 0.312282  | 0.330568  |
| H | 6.167605  | 0.425485  | 0.424684  |
| C | -3.607056 | -2.263568 | 0.393258  |
| C | -1.315525 | -3.434168 | 0.291999  |
| H | -1.702421 | -4.208293 | 0.973883  |
| H | -0.872431 | -2.659345 | 0.935085  |
| C | -4.599432 | -1.358344 | -0.364366 |
| H | -5.553052 | -1.313409 | 0.183670  |
| C | -2.472535 | -2.801615 | -0.493939 |
| H | -2.888924 | -3.535516 | -1.202546 |
| H | -2.065912 | -1.985043 | -1.110297 |
| H | -4.830998 | -1.823350 | -1.334804 |
| C | -4.090291 | 0.080237  | -0.590308 |
| H | -4.642934 | 0.539920  | -1.423692 |
| H | -3.036764 | 0.053114  | -0.905513 |
| H | -3.176666 | -1.706742 | 1.240040  |
| H | -4.146382 | -3.114287 | 0.836196  |
| C | -4.241915 | 0.978745  | 0.646672  |
| H | -3.824470 | 0.478832  | 1.532789  |
| H | -5.314280 | 1.117675  | 0.850560  |
| C | -3.587793 | 2.373340  | 0.509231  |
| H | -3.965927 | 3.011425  | 1.320627  |
| H | -3.914042 | 2.836868  | -0.432305 |

Sum of electronic and zero-point Energies= -1083.752900  
Sum of electronic and thermal Energies= -1083.728002  
Sum of electronic and thermal Enthalpies= -1083.727058  
Sum of electronic and thermal Free Energies= -1083.808219

daec[n=5]-5-TS (dmf)

|   |           |           |           |
|---|-----------|-----------|-----------|
| C | -1.272696 | 3.045767  | -0.488412 |
| H | -1.682624 | 3.930024  | -0.973913 |
| C | -2.063790 | 1.898745  | -0.314547 |
| C | -1.465589 | 0.806843  | 0.328373  |
| H | -2.016935 | -0.106349 | 0.496512  |
| C | -0.138260 | 0.842804  | 0.742742  |
| H | 0.278374  | -0.029391 | 1.230227  |
| C | 0.659914  | 1.959741  | 0.497867  |
| O | 2.014855  | 1.982836  | 0.819804  |
| C | 0.076516  | 3.089961  | -0.105254 |
| O | 0.805202  | 4.212442  | -0.409943 |
| C | 1.293694  | 4.955118  | 0.714650  |
| H | 1.805792  | 5.830718  | 0.302353  |
| H | 2.000743  | 4.366891  | 1.311213  |
| H | 0.462328  | 5.289157  | 1.352457  |
| C | 4.190268  | -1.188465 | -0.819536 |
| H | 4.731541  | -2.012724 | -1.281177 |
| C | 3.394636  | -1.425312 | 0.314280  |
| C | 3.181881  | -2.822982 | 0.865555  |
| H | 2.611331  | -2.754312 | 1.800830  |
| H | 4.150419  | -3.276309 | 1.123551  |
| C | 2.465825  | -3.781201 | -0.120531 |
| H | 3.132023  | -3.946459 | -0.979771 |
| C | 1.092745  | -3.338539 | -0.663842 |

|   |           |           |           |
|---|-----------|-----------|-----------|
| H | 0.824279  | -4.029330 | -1.478145 |
| H | 1.188087  | -2.348030 | -1.133547 |
| C | -0.072603 | -3.309630 | 0.340987  |
| H | 0.124913  | -2.568416 | 1.130515  |
| H | -0.142516 | -4.285489 | 0.848101  |
| H | 2.363570  | -4.758661 | 0.374973  |
| C | 2.731976  | -0.337680 | 0.898572  |
| H | 2.162258  | -0.487068 | 1.810887  |
| C | 2.770207  | 0.926700  | 0.302800  |
| C | 3.557411  | 1.157998  | -0.825117 |
| H | 3.580160  | 2.149534  | -1.270460 |
| C | 4.285737  | 0.093545  | -1.368081 |
| H | 4.910304  | 0.263138  | -2.243253 |
| C | -3.984625 | -2.692897 | -0.061563 |
| C | -1.418579 | -2.989379 | -0.337785 |
| H | -1.328266 | -2.027853 | -0.863887 |
| H | -1.611100 | -3.744373 | -1.117189 |
| C | -4.220146 | -1.267758 | -0.609955 |
| H | -5.063936 | -1.294597 | -1.316443 |
| C | -2.621629 | -2.950005 | 0.621309  |
| H | -2.444857 | -2.196542 | 1.404103  |
| H | -2.679925 | -3.915763 | 1.147057  |
| H | -3.347996 | -0.961350 | -1.203468 |
| C | -4.523877 | -0.219021 | 0.476346  |
| H | -3.794185 | -0.300194 | 1.291474  |
| H | -5.492559 | -0.468065 | 0.936738  |
| H | -4.787790 | -2.931216 | 0.653152  |
| H | -4.095063 | -3.412145 | -0.887799 |
| C | -4.607239 | 1.249583  | -0.003792 |
| H | -4.727202 | 1.892835  | 0.880684  |
| H | -5.531352 | 1.367467  | -0.589769 |
| C | -3.469175 | 1.819737  | -0.888083 |
| H | -3.423941 | 1.231654  | -1.817837 |
| H | -3.771939 | 2.828946  | -1.198943 |

Sum of electronic and zero-point Energies= -1083.731265  
Sum of electronic and thermal Energies= -1083.707319  
Sum of electronic and thermal Enthalpies= -1083.706374  
Sum of electronic and thermal Free Energies= -1083.783724

daec[n=5]-5-E1 (dmf)

|   |           |           |           |
|---|-----------|-----------|-----------|
| C | 1.497097  | 2.218726  | 0.867865  |
| H | 2.060170  | 2.257294  | 1.798488  |
| C | 2.166154  | 2.173917  | -0.356919 |
| C | 1.392083  | 2.133561  | -1.530838 |
| H | 1.871414  | 2.110482  | -2.507018 |
| C | 0.001826  | 2.133697  | -1.450913 |
| H | -0.604477 | 2.113981  | -2.354391 |
| C | -0.658692 | 2.176510  | -0.216944 |
| O | -2.044654 | 2.278838  | -0.194557 |
| C | 0.093857  | 2.228922  | 0.972561  |
| O | -0.375194 | 2.339329  | 2.244800  |
| C | -1.707803 | 1.952605  | 2.596770  |
| H | -1.718628 | 1.933966  | 3.691414  |
| H | -1.948687 | 0.950906  | 2.220642  |
| H | -2.449834 | 2.673722  | 2.239610  |
| C | -4.569298 | -0.987235 | -0.764697 |
| H | -5.254012 | -1.822776 | -0.900245 |
| C | -3.185482 | -1.210231 | -0.817465 |
| C | -2.641751 | -2.609637 | -1.031787 |
| H | -1.768502 | -2.569418 | -1.696527 |
| H | -3.403462 | -3.202633 | -1.555329 |
| C | -2.264987 | -3.359149 | 0.272875  |
| H | -3.114662 | -3.294718 | 0.968215  |
| C | -0.986904 | -2.872105 | 0.980258  |
| H | -0.942473 | -3.333287 | 1.978689  |
| H | -1.048612 | -1.787778 | 1.153359  |
| C | 0.309299  | -3.202169 | 0.224112  |
| H | 0.232861  | -2.856796 | -0.817893 |
| H | 0.422410  | -4.297003 | 0.170871  |
| H | -2.148893 | -4.425966 | 0.028304  |

|   |           |           |           |
|---|-----------|-----------|-----------|
| C | -2.316020 | -0.117871 | -0.649312 |
| H | -1.242588 | -0.270911 | -0.703348 |
| C | -2.828178 | 1.163047  | -0.418273 |
| C | -4.210791 | 1.381228  | -0.373441 |
| H | -4.586607 | 2.386873  | -0.200893 |
| C | -5.073338 | 0.299963  | -0.549715 |
| H | -6.148993 | 0.464228  | -0.518557 |
| C | 4.149905  | -2.330869 | 0.581294  |
| C | 1.573159  | -2.586493 | 0.843351  |
| H | 1.471143  | -1.490774 | 0.841982  |
| H | 1.655491  | -2.884493 | 1.901095  |
| C | 4.230509  | -0.800614 | 0.409642  |
| H | 5.228944  | -0.472204 | 0.739215  |
| C | 2.850291  | -2.998199 | 0.094971  |
| H | 2.716606  | -2.795428 | -0.978205 |
| H | 2.969628  | -4.089694 | 0.177872  |
| H | 3.514999  | -0.311966 | 1.085990  |
| C | 3.988676  | -0.318853 | -1.029754 |
| H | 2.934440  | -0.476696 | -1.296789 |
| H | 4.572000  | -0.946238 | -1.722074 |
| H | 4.991774  | -2.786433 | 0.036671  |
| H | 4.307520  | -2.576532 | 1.643263  |
| C | 4.361254  | 1.149866  | -1.296954 |
| H | 4.139288  | 1.380895  | -2.348970 |
| H | 5.448937  | 1.273995  | -1.184134 |
| C | 3.684114  | 2.199933  | -0.390330 |
| H | 4.056557  | 2.094156  | 0.636603  |
| H | 4.015164  | 3.194616  | -0.728002 |

Sum of electronic and zero-point Energies= -1083.746252  
Sum of electronic and thermal Energies= -1083.721430  
Sum of electronic and thermal Enthalpies= -1083.720486  
Sum of electronic and thermal Free Energies= -1083.801069

#### daec[n=5]-5-E2 (dmf)

|   |           |           |           |
|---|-----------|-----------|-----------|
| C | 1.731794  | 2.702179  | -0.071528 |
| H | 2.406957  | 3.304552  | -0.676865 |
| C | 2.234344  | 1.819861  | 0.897739  |
| C | 1.310280  | 1.085934  | 1.654895  |
| H | 1.665557  | 0.408320  | 2.429135  |
| C | -0.065502 | 1.221537  | 1.449627  |
| H | -0.769598 | 0.658572  | 2.057500  |
| C | -0.547843 | 2.089062  | 0.467591  |
| O | -1.897839 | 2.311564  | 0.274823  |
| C | 0.360434  | 2.846300  | -0.297629 |
| O | -0.067123 | 3.772118  | -1.216997 |
| C | -0.646672 | 3.229592  | -2.410004 |
| H | -0.887379 | 4.085590  | -3.048810 |
| H | -1.564487 | 2.667642  | -2.198551 |
| H | 0.069812  | 2.578217  | -2.931329 |
| C | -4.649760 | -0.817980 | 0.265331  |
| H | -5.389849 | -1.616686 | 0.255478  |
| C | -3.416424 | -1.009417 | -0.381220 |
| C | -3.102498 | -2.323512 | -1.069178 |
| H | -2.368800 | -2.154018 | -1.867822 |
| H | -4.014665 | -2.695936 | -1.555586 |
| C | -2.587521 | -3.428179 | -0.113356 |
| H | -3.326689 | -3.563559 | 0.689895  |
| C | -1.204293 | -3.178645 | 0.512706  |
| H | -1.039903 | -3.932051 | 1.298329  |
| H | -1.201269 | -2.204425 | 1.024428  |
| C | -0.032319 | -3.239129 | -0.478976 |
| H | -0.185800 | -2.508973 | -1.287885 |
| H | -0.020607 | -4.229430 | -0.962317 |
| H | -2.563078 | -4.376424 | -0.671623 |
| C | -2.481895 | 0.035573  | -0.367113 |
| H | -1.527062 | -0.082948 | -0.873908 |
| C | -2.772009 | 1.235936  | 0.292541  |
| C | -3.999471 | 1.424518  | 0.930181  |
| H | -4.206100 | 2.368883  | 1.427737  |
| C | -4.937577 | 0.388224  | 0.907952  |

|   |           |           |           |
|---|-----------|-----------|-----------|
| H | -5.899177 | 0.526899  | 1.398731  |
| C | 3.895285  | -2.823929 | -0.208420 |
| C | 1.332995  | -2.973338 | 0.173154  |
| H | 1.312931  | -1.979431 | 0.644309  |
| H | 1.496710  | -3.695783 | 0.989281  |
| C | 4.150974  | -1.426307 | 0.388588  |
| H | 5.167797  | -1.415778 | 0.812214  |
| C | 2.501210  | -3.057663 | -0.820610 |
| H | 2.331000  | -2.342819 | -1.639790 |
| H | 2.494574  | -4.054566 | -1.288418 |
| H | 3.471530  | -1.255016 | 1.235224  |
| C | 4.022729  | -0.277257 | -0.623601 |
| H | 2.980865  | -0.195187 | -0.964197 |
| H | 4.614150  | -0.525719 | -1.518958 |
| H | 4.651609  | -3.014941 | -0.985964 |
| H | 4.069137  | -3.578038 | 0.575244  |
| C | 4.493506  | 1.093935  | -0.108903 |
| H | 4.427642  | 1.818919  | -0.933490 |
| H | 5.559018  | 1.034960  | 0.161045  |
| C | 3.727417  | 1.658052  | 1.110336  |
| H | 3.893085  | 1.013268  | 1.982912  |
| H | 4.168681  | 2.634389  | 1.360835  |

Sum of electronic and zero-point Energies= -1083.749456  
Sum of electronic and thermal Energies= -1083.724425  
Sum of electronic and thermal Enthalpies= -1083.723481  
Sum of electronic and thermal Free Energies= -1083.804995

#### daec[n=5]-6-TS (dmf)

|   |           |           |           |
|---|-----------|-----------|-----------|
| C | 1.860750  | 2.953199  | 0.085390  |
| H | 2.545285  | 3.750745  | -0.190225 |
| C | 2.381860  | 1.672606  | 0.350954  |
| C | 1.477237  | 0.667480  | 0.694078  |
| H | 1.818858  | -0.333031 | 0.923839  |
| C | 0.105469  | 0.909693  | 0.738932  |
| H | -0.554363 | 0.088910  | 0.984382  |
| C | -0.411783 | 2.167708  | 0.451771  |
| O | -1.768919 | 2.463851  | 0.460738  |
| C | 0.482478  | 3.218015  | 0.136384  |
| O | -0.082456 | 4.428423  | -0.123716 |
| C | 0.780469  | 5.512365  | -0.455481 |
| H | 1.345643  | 5.312270  | -1.376762 |
| H | 1.482361  | 5.734824  | 0.360591  |
| H | 0.125970  | 6.374534  | -0.614034 |
| C | -4.329015 | -0.579142 | -0.815983 |
| H | -4.965686 | -1.383192 | -1.182127 |
| C | -3.689830 | -0.710011 | 0.427894  |
| C | -3.755884 | -1.999184 | 1.223266  |
| H | -4.798326 | -2.337698 | 1.309852  |
| H | -3.396875 | -1.811546 | 2.244398  |
| C | -2.929310 | -3.152165 | 0.595540  |
| H | -3.019235 | -4.027087 | 1.257315  |
| C | -1.440909 | -2.850997 | 0.340338  |
| H | -0.967638 | -2.497441 | 1.268936  |
| H | -1.361183 | -2.023571 | -0.379627 |
| C | -0.680160 | -4.072249 | -0.214918 |
| H | -1.333879 | -4.581718 | -0.940136 |
| H | -0.507109 | -4.799436 | 0.594100  |
| H | -3.395141 | -3.442072 | -0.358424 |
| C | -2.897242 | 0.352020  | 0.884767  |
| H | -2.436526 | 0.293590  | 1.867235  |
| C | -2.647123 | 1.458893  | 0.067028  |
| C | -3.282729 | 1.584681  | -1.169479 |
| H | -3.089918 | 2.459579  | -1.785560 |
| C | -4.144931 | 0.567816  | -1.593431 |
| H | -4.652955 | 0.660872  | -2.551578 |
| C | 3.071674  | -2.983439 | -0.916161 |
| C | 0.648310  | -3.763842 | -0.934520 |
| H | 0.974462  | -4.676908 | -1.456992 |
| H | 0.452054  | -3.021304 | -1.724885 |
| C | 4.345027  | -2.555028 | -0.155883 |

|   |          |           |           |
|---|----------|-----------|-----------|
| H | 5.186577 | -2.568344 | -0.866580 |
| C | 1.817906 | -3.266187 | -0.065957 |
| H | 2.054420 | -4.022662 | 0.699864  |
| H | 1.517549 | -2.360864 | 0.477988  |
| H | 4.578377 | -3.321227 | 0.599850  |
| C | 4.312730 | -1.179044 | 0.540183  |
| H | 5.231820 | -1.069842 | 1.136307  |
| H | 3.494888 | -1.164351 | 1.270227  |
| H | 3.313562 | -3.897602 | -1.480814 |
| H | 2.820854 | -2.227815 | -1.675819 |
| C | 4.219107 | 0.023899  | -0.423344 |
| H | 3.481464 | -0.175367 | -1.212175 |
| H | 5.187852 | 0.118840  | -0.935437 |
| C | 3.872845 | 1.386288  | 0.234967  |
| H | 4.343916 | 1.435069  | 1.230338  |
| H | 4.332259 | 2.195413  | -0.348248 |

Sum of electronic and zero-point Energies= -1083.737069  
Sum of electronic and thermal Energies= -1083.713035  
Sum of electronic and thermal Enthalpies= -1083.712091  
Sum of electronic and thermal Free Energies= -1083.790010

#### daec[n=5]-6-E1 (dmf)

|   |           |           |           |
|---|-----------|-----------|-----------|
| C | -1.346396 | 2.024085  | 0.771117  |
| H | -1.892552 | 1.792955  | 1.681124  |
| C | -2.065825 | 2.347491  | -0.395543 |
| C | -1.353796 | 2.664036  | -1.556712 |
| H | -1.889277 | 2.920330  | -2.468832 |
| C | 0.048144  | 2.663788  | -1.555216 |
| H | 0.608664  | 2.922942  | -2.450873 |
| C | 0.750443  | 2.343281  | -0.400449 |
| O | 2.131162  | 2.454633  | -0.376484 |
| C | 0.051688  | 2.015357  | 0.784933  |
| O | 0.818078  | 1.727531  | 1.868325  |
| C | 0.158854  | 1.381315  | 3.085070  |
| H | -0.459121 | 0.480757  | 2.964925  |
| H | -0.465689 | 2.207294  | 3.452208  |
| H | 0.955702  | 1.181076  | 3.806836  |
| C | 4.609928  | -0.888627 | -0.173976 |
| H | 5.282541  | -1.743637 | -0.126939 |
| C | 3.357897  | -1.026228 | -0.792855 |
| C | 2.937810  | -2.353751 | -1.394258 |
| H | 3.838992  | -2.899088 | -1.706038 |
| H | 2.349096  | -2.170983 | -2.304851 |
| C | 2.115607  | -3.269798 | -0.457272 |
| H | 1.999122  | -4.240201 | -0.963676 |
| C | 0.726776  | -2.725683 | -0.096496 |
| H | 0.227028  | -2.402056 | -1.021052 |
| H | 0.829182  | -1.824477 | 0.526552  |
| C | -0.159106 | -3.749030 | 0.630662  |
| H | 0.385290  | -4.144848 | 1.502259  |
| H | -0.333720 | -4.609189 | -0.035461 |
| H | 2.690504  | -3.467709 | 0.460247  |
| C | 2.507733  | 0.090574  | -0.852707 |
| H | 1.541435  | 0.011188  | -1.344525 |
| C | 2.903621  | 1.311469  | -0.298737 |
| C | 4.157524  | 1.447257  | 0.306388  |
| H | 4.447811  | 2.409432  | 0.721388  |
| C | 5.004923  | 0.340187  | 0.364781  |
| H | 5.982192  | 0.438491  | 0.834321  |
| C | -3.777436 | -2.155675 | 0.467717  |
| C | -1.513498 | -3.191565 | 1.105696  |
| H | -2.064173 | -3.992876 | 1.622965  |
| H | -1.336540 | -2.408267 | 1.860488  |
| C | -4.615164 | -1.444989 | -0.614081 |
| H | -5.648213 | -1.331359 | -0.249832 |
| C | -2.392284 | -2.613347 | -0.013861 |
| H | -2.517203 | -3.366425 | -0.809233 |
| H | -1.870202 | -1.765803 | -0.477031 |
| H | -4.676145 | -2.099835 | -1.497226 |
| C | -4.090621 | -0.063667 | -1.053519 |

|   |           |           |           |
|---|-----------|-----------|-----------|
| H | -4.630545 | 0.249270  | -1.960415 |
| H | -3.034505 | -0.143161 | -1.347664 |
| H | -4.337153 | -3.031774 | 0.829879  |
| H | -3.658619 | -1.495565 | 1.340339  |
| C | -4.248004 | 1.032315  | 0.010869  |
| H | -3.838696 | 0.690454  | 0.971491  |
| H | -5.319738 | 1.211403  | 0.184940  |
| C | -3.584343 | 2.375069  | -0.363857 |
| H | -3.957600 | 2.707964  | -1.342351 |
| H | -3.908627 | 3.133205  | 0.365147  |

Sum of electronic and zero-point Energies= -1083.753955  
Sum of electronic and thermal Energies= -1083.729117  
Sum of electronic and thermal Enthalpies= -1083.728172  
Sum of electronic and thermal Free Energies= -1083.808597

#### daec[n=5]-6-E2 (dmf)

|   |           |           |           |
|---|-----------|-----------|-----------|
| C | -1.142450 | 2.643393  | -0.510513 |
| H | -1.589536 | 3.028262  | -1.422540 |
| C | -1.982896 | 2.255476  | 0.546080  |
| C | -1.402079 | 1.763233  | 1.723496  |
| H | -2.031771 | 1.467624  | 2.560348  |
| C | -0.013606 | 1.664901  | 1.839638  |
| H | 0.446673  | 1.299403  | 2.755282  |
| C | 0.813185  | 2.058040  | 0.790758  |
| O | 2.188765  | 2.061009  | 0.970064  |
| C | 0.254527  | 2.554958  | -0.404008 |
| O | 1.133689  | 2.917637  | -1.373483 |
| C | 0.609758  | 3.428569  | -2.598294 |
| H | 0.032880  | 4.349307  | -2.435360 |
| H | -0.021126 | 2.686653  | -3.106837 |
| H | 1.480195  | 3.652291  | -3.221600 |
| C | 4.574523  | -1.232754 | 0.066895  |
| H | 5.221275  | -2.079482 | -0.157296 |
| C | 3.292065  | -1.172706 | -0.498372 |
| C | 2.804330  | -2.279146 | -1.414534 |
| H | 3.677393  | -2.771219 | -1.863938 |
| H | 2.229434  | -1.840359 | -2.243130 |
| C | 1.930946  | -3.361698 | -0.736327 |
| H | 1.784996  | -4.172457 | -1.466433 |
| C | 0.558208  | -2.862767 | -0.265718 |
| H | 0.090322  | -2.306865 | -1.091000 |
| H | 0.683757  | -2.141269 | 0.555252  |
| C | -0.384268 | -3.987273 | 0.190082  |
| H | 0.120174  | -4.594504 | 0.957843  |
| H | -0.573940 | -4.664534 | -0.658138 |
| H | 2.481712  | -3.802577 | 0.108533  |
| C | 2.472974  | -0.068561 | -0.205104 |
| H | 1.481798  | -0.000201 | -0.644177 |
| C | 2.930420  | 0.946394  | 0.640696  |
| C | 4.215584  | 0.885828  | 1.194521  |
| H | 4.553267  | 1.689860  | 1.844138  |
| C | 5.030478  | -0.207363 | 0.902169  |
| H | 6.030141  | -0.259061 | 1.330139  |
| C | -3.917964 | -2.207566 | 0.328311  |
| C | -1.728202 | -3.490476 | 0.755235  |
| H | -2.321517 | -4.360292 | 1.078050  |
| H | -1.539207 | -2.896437 | 1.663839  |
| C | -4.688416 | -1.249553 | -0.602387 |
| H | -5.724092 | -1.151376 | -0.241270 |
| C | -2.555521 | -2.648267 | -0.227583 |
| H | -2.712433 | -3.218995 | -1.157659 |
| H | -1.977545 | -1.759167 | -0.511151 |
| H | -4.758454 | -1.711108 | -1.599601 |
| C | -4.078037 | 0.159108  | -0.744709 |
| H | -4.545373 | 0.665995  | -1.602849 |
| H | -3.009839 | 0.078297  | -0.991218 |
| H | -4.536597 | -3.099516 | 0.511752  |
| H | -3.773540 | -1.735376 | 1.312042  |
| C | -4.254966 | 1.043951  | 0.498201  |
| H | -3.936475 | 0.502404  | 1.399753  |

|   |           |          |           |
|---|-----------|----------|-----------|
| H | -5.325678 | 1.258407 | 0.634062  |
| C | -3.492002 | 2.385293 | 0.429737  |
| H | -3.744062 | 2.903197 | -0.506075 |
| H | -3.852031 | 3.027833 | 1.246951  |

Sum of electronic and zero-point Energies= -1083.753124  
Sum of electronic and thermal Energies= -1083.728187  
Sum of electronic and thermal Enthalpies= -1083.727243  
Sum of electronic and thermal Free Energies= -1083.808706

daec[n=5]-7-TS (dmf)

|   |           |           |           |
|---|-----------|-----------|-----------|
| C | -3.090936 | 1.883750  | 0.103926  |
| H | -3.919586 | 2.552776  | -0.111447 |
| C | -1.791295 | 2.418101  | 0.192082  |
| C | -0.749000 | 1.531482  | 0.463512  |
| H | 0.269317  | 1.881541  | 0.564289  |
| C | -0.979046 | 0.164541  | 0.608080  |
| H | -0.128932 | -0.476140 | 0.792134  |
| C | -2.259292 | -0.368557 | 0.501064  |
| O | -2.553385 | -1.722440 | 0.621551  |
| C | -3.342099 | 0.510716  | 0.260719  |
| O | -4.572717 | -0.063361 | 0.174724  |
| C | -5.690920 | 0.783899  | -0.073208 |
| H | -5.603192 | 1.297620  | -1.040999 |
| H | -6.563680 | 0.124551  | -0.093019 |
| H | -5.817767 | 1.529683  | 0.724127  |
| C | 0.343748  | -4.318303 | -0.901070 |
| H | 1.113767  | -4.941115 | -1.353936 |
| C | 0.645075  | -3.556198 | 0.236791  |
| C | 2.060089  | -3.375453 | 0.748056  |
| H | 2.656451  | -4.286957 | 0.607040  |
| H | 2.038131  | -3.163752 | 1.826398  |
| C | 2.735818  | -2.189331 | 0.006387  |
| H | 2.986311  | -2.512487 | -1.015700 |
| C | 3.988343  | -1.635382 | 0.700197  |
| H | 4.656511  | -2.470013 | 0.963897  |
| H | 3.695472  | -1.170525 | 1.654117  |
| C | 4.796639  | -0.637719 | -0.154871 |
| H | 5.140340  | -1.165712 | -1.058239 |
| H | 5.708526  | -0.367456 | 0.400454  |
| H | 1.999357  | -1.381648 | -0.104422 |
| C | -0.373012 | -2.779984 | 0.810319  |
| H | -0.172967 | -2.236573 | 1.729088  |
| C | -1.603295 | -2.630700 | 0.166718  |
| C | -1.903457 | -3.392083 | -0.966652 |
| H | -2.873959 | -3.283799 | -1.444819 |
| C | -0.932443 | -4.260789 | -1.474087 |
| H | -1.159851 | -4.863536 | -2.351492 |
| C | 3.459136  | 3.091757  | 0.047504  |
| C | 4.100320  | 0.665955  | -0.602896 |
| H | 4.787103  | 1.174866  | -1.297624 |
| H | 3.202739  | 0.429879  | -1.192719 |
| C | 2.157611  | 3.284928  | -0.778322 |
| H | 1.718799  | 2.305327  | -1.014367 |
| C | 3.746886  | 1.651487  | 0.527341  |
| H | 4.592697  | 1.692417  | 1.231882  |
| H | 2.888593  | 1.276297  | 1.106325  |
| H | 2.389907  | 3.740799  | -1.751725 |
| C | 1.094595  | 4.154383  | -0.074871 |
| H | 1.506368  | 5.165259  | 0.060063  |
| H | 0.934205  | 3.775113  | 0.943846  |
| H | 4.325891  | 3.434349  | -0.537057 |
| H | 3.422207  | 3.747055  | 0.930723  |
| C | -0.261677 | 4.245254  | -0.835183 |
| H | -0.234250 | 3.593290  | -1.720283 |
| H | -0.383564 | 5.265795  | -1.222620 |
| C | -1.532874 | 3.903307  | -0.016551 |
| H | -1.473599 | 4.412538  | 0.959268  |
| H | -2.406016 | 4.336591  | -0.523291 |

Sum of electronic and zero-point Energies= -1083.726560  
Sum of electronic and thermal Energies= -1083.702481

Sum of electronic and thermal Enthalpies= -1083.701537  
Sum of electronic and thermal Free Energies= -1083.779888

daec[n=5]-7-E1 (dmf)

|   |           |           |           |
|---|-----------|-----------|-----------|
| C | -1.311432 | 2.370976  | 0.661582  |
| H | -1.816937 | 2.383033  | 1.622472  |
| C | -2.079592 | 2.382533  | -0.518130 |
| C | -1.417179 | 2.393077  | -1.750684 |
| H | -1.991803 | 2.408777  | -2.674767 |
| C | -0.017182 | 2.393284  | -1.807937 |
| H | 0.503944  | 2.411233  | -2.762762 |
| C | 0.733059  | 2.375891  | -0.639242 |
| O | 2.115627  | 2.461701  | -0.696022 |
| C | 0.086882  | 2.360872  | 0.617948  |
| O | 0.900318  | 2.348046  | 1.704977  |
| C | 0.295626  | 2.310528  | 2.996449  |
| H | -0.322479 | 1.411385  | 3.124573  |
| H | 1.123866  | 2.286275  | 3.710315  |
| H | -0.315863 | 3.204675  | 3.179753  |
| C | 4.515717  | -0.890814 | -0.079818 |
| H | 5.164106  | -1.750763 | 0.079237  |
| C | 3.181866  | -1.088463 | -0.460569 |
| C | 2.611704  | -2.478214 | -0.671397 |
| H | 3.412592  | -3.222921 | -0.567531 |
| H | 2.243306  | -2.559920 | -1.705894 |
| C | 1.451515  | -2.823947 | 0.283411  |
| H | 1.823536  | -2.846023 | 1.319438  |
| C | 0.776184  | -4.158531 | -0.059231 |
| H | 1.517551  | -4.969208 | 0.013276  |
| H | 0.458672  | -4.136069 | -1.112516 |
| C | -0.426869 | -4.513208 | 0.835087  |
| H | -0.075919 | -4.645406 | 1.870479  |
| H | -0.816265 | -5.493540 | 0.518757  |
| H | 0.709597  | -2.015692 | 0.241696  |
| C | 2.360985  | 0.034335  | -0.660685 |
| H | 1.327273  | -0.099573 | -0.968932 |
| C | 2.865154  | 1.323014  | -0.477793 |
| C | 4.202025  | 1.518338  | -0.107710 |
| H | 4.576906  | 2.530521  | 0.024368  |
| C | 5.018860  | 0.405465  | 0.088627  |
| H | 6.057749  | 0.549908  | 0.380339  |
| C | -3.448950 | -2.322011 | -0.519038 |
| C | -1.584424 | -3.495447 | 0.837917  |
| H | -2.368280 | -3.869350 | 1.515457  |
| H | -1.239040 | -2.548634 | 1.275491  |
| C | -3.178667 | -0.865795 | -0.105240 |
| H | -2.411976 | -0.438051 | -0.767415 |
| C | -2.209375 | -3.234428 | -0.542094 |
| H | -2.492139 | -4.200649 | -0.989342 |
| H | -1.458544 | -2.796676 | -1.217057 |
| H | -2.758040 | -0.837820 | 0.910924  |
| C | -4.451621 | -0.004787 | -0.140119 |
| H | -5.230478 | -0.526788 | 0.437832  |
| H | -4.830728 | 0.047060  | -1.173524 |
| H | -4.204011 | -2.754500 | 0.157420  |
| H | -3.904793 | -2.323541 | -1.521624 |
| C | -4.332251 | 1.422506  | 0.425764  |
| H | -3.876412 | 1.384987  | 1.426358  |
| H | -5.351294 | 1.807030  | 0.578027  |
| C | -3.595622 | 2.461103  | -0.450117 |
| H | -3.998386 | 2.415842  | -1.471698 |
| H | -3.861762 | 3.458753  | -0.066683 |

Sum of electronic and zero-point Energies= -1083.752124  
Sum of electronic and thermal Energies= -1083.727173  
Sum of electronic and thermal Enthalpies= -1083.726229  
Sum of electronic and thermal Free Energies= -1083.807424

daec[n=5]-7-E2 (dmf)

|   |           |          |           |
|---|-----------|----------|-----------|
| C | 0.019775  | 2.858460 | -0.688261 |
| H | -0.389974 | 3.151864 | -1.650483 |

|   |           |           |           |
|---|-----------|-----------|-----------|
| C | -0.770241 | 3.016220  | 0.462315  |
| C | -0.235569 | 2.651211  | 1.705484  |
| H | -0.822276 | 2.783421  | 2.612403  |
| C | 1.044943  | 2.098665  | 1.787698  |
| H | 1.463852  | 1.793296  | 2.744272  |
| C | 1.810182  | 1.919392  | 0.639800  |
| O | 3.083471  | 1.378641  | 0.745232  |
| C | 1.313175  | 2.320739  | -0.616699 |
| O | 2.137184  | 2.128557  | -1.678492 |
| C | 1.668600  | 2.513051  | -2.970313 |
| H | 1.449719  | 3.588799  | -3.013831 |
| H | 2.483592  | 2.280742  | -3.661638 |
| H | 0.773494  | 1.945319  | -3.259057 |
| C | 3.701141  | -2.700475 | 0.136993  |
| H | 3.888167  | -3.762800 | -0.010270 |
| C | 2.437109  | -2.170547 | -0.153869 |
| C | 1.318105  | -3.038746 | -0.698584 |
| H | 1.686139  | -4.066148 | -0.824960 |
| H | 1.049293  | -2.681948 | -1.705399 |
| C | 0.040118  | -3.055808 | 0.164507  |
| H | 0.274741  | -3.472978 | 1.155970  |
| C | -1.088228 | -3.867530 | -0.486646 |
| H | -0.731131 | -4.894751 | -0.658957 |
| H | -1.299321 | -3.452770 | -1.483996 |
| C | -2.390734 | -3.940171 | 0.330465  |
| H | -2.169469 | -4.381552 | 1.314947  |
| H | -3.071121 | -4.645682 | -0.171672 |
| H | -0.295385 | -2.023854 | 0.336115  |
| C | 2.215950  | -0.797906 | 0.045083  |
| H | 1.240152  | -0.375918 | -0.175727 |
| C | 3.238617  | 0.026193  | 0.520012  |
| C | 4.504945  | -0.504874 | 0.800361  |
| H | 5.289549  | 0.151936  | 1.686605  |
| C | 4.724918  | -1.868032 | 0.607168  |
| H | 5.705274  | -2.286879 | 0.827972  |
| C | -4.714035 | -0.889222 | -0.588581 |
| C | -3.145528 | -2.612718 | 0.542601  |
| H | -4.046108 | -2.834058 | 1.136899  |
| H | -2.541643 | -1.931172 | 1.158661  |
| C | -4.448972 | 0.304442  | 0.346870  |
| H | -4.184563 | -0.059673 | 1.351402  |
| C | -3.570377 | -1.907761 | -0.758712 |
| H | -3.908484 | -2.668889 | -1.479663 |
| H | -2.700670 | -1.421391 | -1.223623 |
| H | -5.394774 | 0.855386  | 0.468729  |
| C | -3.370783 | 1.288602  | -0.133098 |
| H | -3.598615 | 1.607368  | -1.163189 |
| H | -2.394639 | 0.784490  | -0.177033 |
| H | -5.599391 | -1.427994 | -0.215781 |
| H | -4.991670 | -0.502812 | -1.581985 |
| C | -3.271496 | 2.527591  | 0.769326  |
| H | -3.088726 | 2.208999  | 1.806597  |
| H | -4.242772 | 3.044955  | 0.776234  |
| C | -2.187155 | 3.548539  | 0.358079  |
| H | -2.375949 | 3.886952  | -0.669996 |
| H | -2.289303 | 4.434260  | 1.002544  |

Sum of electronic and zero-point Energies= -1083.753448  
Sum of electronic and thermal Energies= -1083.728523  
Sum of electronic and thermal Enthalpies= -1083.727579  
Sum of electronic and thermal Free Energies= -1083.808838

#### daec[n=5]-8-TS (dmf)

|   |           |           |           |
|---|-----------|-----------|-----------|
| C | 1.347718  | -3.279181 | 0.219293  |
| H | 1.565534  | -4.338687 | 0.324765  |
| C | -0.000629 | -2.862561 | 0.160148  |
| C | -0.215093 | -1.490893 | 0.019881  |
| H | -1.200387 | -1.066216 | 0.027569  |
| C | 0.830404  | -0.584095 | -0.094034 |
| H | 0.580384  | 0.455729  | -0.248812 |
| C | 2.151362  | -0.984451 | 0.029776  |

|   |           |           |           |
|---|-----------|-----------|-----------|
| O | 3.217311  | -0.099240 | 0.011295  |
| C | 2.419064  | -2.367606 | 0.178503  |
| O | 3.733675  | -2.712993 | 0.267377  |
| C | 4.056625  | -4.093119 | 0.407514  |
| H | 5.148626  | -4.139125 | 0.455976  |
| H | 3.707090  | -4.679671 | -0.453956 |
| H | 3.634469  | -4.515769 | 1.330199  |
| C | 2.213241  | 3.892286  | -0.691092 |
| H | 1.923492  | 4.916913  | -0.919360 |
| C | 1.642827  | 3.240860  | 0.418289  |
| C | 0.569331  | 3.923193  | 1.249712  |
| H | 0.899910  | 4.947559  | 1.472848  |
| H | 0.468579  | 3.409746  | 2.215981  |
| C | -0.830252 | 4.025058  | 0.576576  |
| H | -1.381702 | 4.824214  | 1.094156  |
| C | -1.706701 | 2.755634  | 0.598989  |
| H | -1.832021 | 2.430831  | 1.644354  |
| H | -1.193850 | 1.933633  | 0.079634  |
| C | -3.100025 | 2.998134  | -0.026918 |
| H | -2.987082 | 3.161940  | -1.110489 |
| H | -3.492662 | 3.943629  | 0.378646  |
| H | -0.703530 | 4.369381  | -0.461017 |
| C | 2.058776  | 1.934533  | 0.704835  |
| H | 1.650526  | 1.419011  | 1.570511  |
| C | 2.917766  | 1.249593  | -0.167857 |
| C | 3.481586  | 1.901259  | -1.263297 |
| H | 4.156416  | 1.360628  | -1.922497 |
| C | 3.141922  | 3.238545  | -1.502779 |
| H | 3.583937  | 3.759037  | -2.350336 |
| C | -4.915125 | -0.552744 | -0.103229 |
| C | -4.168875 | 1.906854  | 0.220365  |
| H | -4.237552 | 1.722428  | 1.304651  |
| H | -5.149282 | 2.308173  | -0.079947 |
| C | -4.568147 | -1.981595 | -0.612655 |
| H | -4.736438 | -2.053091 | -1.698350 |
| C | -3.923454 | 0.567786  | -0.497596 |
| H | -2.901435 | 0.253958  | -0.261528 |
| H | -3.949593 | 0.722731  | -1.588437 |
| H | -5.255157 | -2.699559 | -0.139535 |
| C | -3.103475 | -2.291872 | -0.279611 |
| H | -2.936834 | -1.971824 | 0.761045  |
| H | -2.527568 | -1.617220 | -0.910297 |
| H | -5.926773 | -0.279643 | -0.439901 |
| H | -4.961947 | -0.594070 | 0.996767  |
| C | -2.473129 | -3.686446 | -0.448112 |
| H | -3.157946 | -4.470098 | -0.090284 |
| H | -2.296218 | -3.892552 | -1.514295 |
| C | -1.145923 | -3.860060 | 0.355407  |
| H | -0.760846 | -4.871606 | 0.165538  |
| H | -1.416784 | -3.847217 | 1.424369  |

Sum of electronic and zero-point Energies= -1083.722570  
Sum of electronic and thermal Energies= -1083.698522  
Sum of electronic and thermal Enthalpies= -1083.697577  
Sum of electronic and thermal Free Energies= -1083.775280

#### daec[n=5]-8-E1 (dmf)

|   |           |           |           |
|---|-----------|-----------|-----------|
| C | 1.531251  | -2.354178 | 0.466646  |
| H | 2.098995  | -2.369554 | 1.392140  |
| C | 2.220082  | -2.294053 | -0.760127 |
| C | 1.479161  | -2.294770 | -1.946164 |
| H | 1.991446  | -2.251193 | -2.905378 |
| C | 0.078699  | -2.347087 | -1.912913 |
| H | -0.502666 | -2.359230 | -2.832312 |
| C | -0.594426 | -2.385170 | -0.698392 |
| O | -1.972717 | -2.522294 | -0.663772 |
| C | 0.134355  | -2.394644 | 0.513825  |
| O | -0.604997 | -2.452925 | 1.651342  |
| C | 0.082111  | -2.445110 | 2.901209  |
| H | -0.697184 | -2.485470 | 3.667541  |
| H | 0.672305  | -1.527439 | 3.029786  |

|                                                           |           |           |           |
|-----------------------------------------------------------|-----------|-----------|-----------|
| H                                                         | 0.738917  | -3.319848 | 3.004180  |
| C                                                         | -4.487226 | 0.649574  | 0.327462  |
| H                                                         | -5.177998 | 1.456152  | 0.568646  |
| C                                                         | -3.410136 | 0.899478  | -0.539144 |
| C                                                         | -3.238488 | 2.277937  | -1.150961 |
| H                                                         | -4.238162 | 2.697437  | -1.328535 |
| H                                                         | -2.758683 | 2.187046  | -2.135909 |
| C                                                         | -2.435814 | 3.290297  | -0.298718 |
| H                                                         | -2.653889 | 4.299561  | -0.679089 |
| C                                                         | -0.917128 | 3.074782  | -0.326641 |
| H                                                         | -0.577523 | 3.112812  | -1.374584 |
| H                                                         | -0.681775 | 2.063959  | 0.034439  |
| C                                                         | -0.139521 | 4.121023  | 0.490574  |
| H                                                         | -0.334393 | 3.966353  | 1.563761  |
| H                                                         | -0.533024 | 5.121345  | 0.251486  |
| H                                                         | -2.803193 | 3.266850  | 0.738624  |
| C                                                         | -2.535796 | -0.155722 | -0.847174 |
| H                                                         | -1.705489 | 0.006566  | -1.530887 |
| C                                                         | -2.749534 | -1.430151 | -0.309007 |
| C                                                         | -3.829348 | -1.674749 | 0.542835  |
| H                                                         | -3.975170 | -2.674945 | 0.942739  |
| C                                                         | -4.693929 | -0.625402 | 0.860438  |
| H                                                         | -5.537710 | -0.807206 | 1.523843  |
| C                                                         | 3.589451  | 2.805727  | 0.275565  |
| C                                                         | 1.378925  | 4.123844  | 0.234916  |
| H                                                         | 1.557669  | 4.344609  | -0.829902 |
| H                                                         | 1.835941  | 4.952417  | 0.798198  |
| C                                                         | 4.278965  | 1.458062  | 0.562072  |
| H                                                         | 4.068904  | 1.165812  | 1.603616  |
| C                                                         | 2.086593  | 2.811585  | 0.598571  |
| H                                                         | 1.598085  | 1.985371  | 0.066411  |
| H                                                         | 1.946561  | 2.606724  | 1.672603  |
| H                                                         | 5.370475  | 1.584346  | 0.496247  |
| C                                                         | 3.840168  | 0.324008  | -0.378030 |
| H                                                         | 4.187480  | 0.539876  | -1.401094 |
| H                                                         | 2.744192  | 0.300530  | -0.429871 |
| H                                                         | 4.085780  | 3.596988  | 0.858339  |
| H                                                         | 3.735555  | 3.070725  | -0.784116 |
| C                                                         | 4.331518  | -1.064385 | 0.051904  |
| H                                                         | 5.428769  | -1.114579 | -0.012064 |
| H                                                         | 4.082682  | -1.220921 | 1.112014  |
| C                                                         | 3.738123  | -2.220516 | -0.783128 |
| H                                                         | 4.155967  | -3.167826 | -0.408931 |
| H                                                         | 4.070509  | -2.127801 | -1.826214 |
| Sum of electronic and zero-point Energies= -1083.752678   |           |           |           |
| Sum of electronic and thermal Energies= -1083.727644      |           |           |           |
| Sum of electronic and thermal Enthalpies= -1083.726700    |           |           |           |
| Sum of electronic and thermal Free Energies= -1083.808342 |           |           |           |

daec[n=5]-8-E2 (dmf)

|   |           |           |           |
|---|-----------|-----------|-----------|
| C | 1.510319  | -2.481959 | -0.839775 |
| H | 2.026031  | -2.565962 | -1.792048 |
| C | 2.270110  | -2.309716 | 0.328672  |
| C | 1.601809  | -2.203008 | 1.556572  |
| H | 2.166937  | -2.080762 | 2.478381  |
| C | 0.206859  | -2.250945 | 1.607149  |
| H | -0.320258 | -2.174006 | 2.555998  |
| C | -0.541007 | -2.409584 | 0.442928  |
| O | -1.921116 | -2.540127 | 0.524329  |
| C | 0.108553  | -2.538799 | -0.800781 |
| O | -0.692022 | -2.699461 | -1.887955 |
| C | -0.069738 | -2.845035 | -3.163610 |
| H | -0.887645 | -2.969512 | -3.879034 |
| H | 0.578998  | -3.731126 | -3.194947 |
| H | 0.514596  | -1.953981 | -3.431219 |
| C | -4.404736 | 0.795278  | 0.811037  |
| H | -5.083770 | 1.643707  | 0.881756  |
| C | -3.404735 | 0.791597  | -0.176758 |
| C | -3.294748 | 1.955462  | -1.144514 |
| H | -4.310965 | 2.292660  | -1.391257 |

|                                                           |           |           |           |
|-----------------------------------------------------------|-----------|-----------|-----------|
| H                                                         | -2.842000 | 1.611407  | -2.085218 |
| C                                                         | -2.495978 | 3.173394  | -0.621736 |
| H                                                         | -2.736519 | 4.036413  | -1.260626 |
| C                                                         | -0.974742 | 2.974625  | -0.615911 |
| H                                                         | -0.646989 | 2.741397  | -1.642158 |
| H                                                         | -0.721275 | 2.095693  | -0.007020 |
| C                                                         | -0.203779 | 4.205645  | -0.109340 |
| H                                                         | -0.397724 | 4.340624  | 0.966698  |
| H                                                         | -0.604170 | 5.103839  | -0.604975 |
| H                                                         | -2.846935 | 3.432016  | 0.389015  |
| C                                                         | -2.546137 | -0.315287 | -0.261293 |
| H                                                         | -1.784098 | -0.356459 | -1.035367 |
| C                                                         | -2.695145 | -1.394762 | 0.618903  |
| C                                                         | -3.696607 | -1.388286 | 1.593003  |
| H                                                         | -3.797998 | -2.241477 | 2.259383  |
| C                                                         | -4.549519 | -0.285081 | 1.683708  |
| H                                                         | -5.333646 | -0.273444 | 2.438781  |
| C                                                         | 3.537627  | 2.916476  | 0.039761  |
| C                                                         | 1.314844  | 4.150725  | -0.357792 |
| H                                                         | 1.494167  | 4.085330  | -1.443200 |
| H                                                         | 1.765266  | 5.101341  | -0.031958 |
| C                                                         | 4.239017  | 1.693894  | 0.661997  |
| H                                                         | 4.021593  | 1.669389  | 1.742003  |
| C                                                         | 2.031131  | 2.985224  | 0.337900  |
| H                                                         | 1.556857  | 2.043767  | 0.032576  |
| H                                                         | 1.881263  | 3.062081  | 1.427252  |
| H                                                         | 5.329603  | 1.815018  | 0.574143  |
| C                                                         | 3.824309  | 0.354474  | 0.033026  |
| H                                                         | 4.165862  | 0.320127  | -1.014011 |
| H                                                         | 2.729052  | 0.295678  | -0.004299 |
| H                                                         | 4.018941  | 3.835567  | 0.408087  |
| H                                                         | 3.693234  | 2.907558  | -1.051222 |
| C                                                         | 4.347513  | -0.875480 | 0.786023  |
| H                                                         | 5.446063  | -0.911833 | 0.734809  |
| H                                                         | 4.094377  | -0.779663 | 1.852392  |
| C                                                         | 3.784619  | -2.213309 | 0.255156  |
| H                                                         | 4.232461  | -3.033578 | 0.836047  |
| H                                                         | 4.104754  | -2.358373 | -0.785713 |
| Sum of electronic and zero-point Energies= -1083.752176   |           |           |           |
| Sum of electronic and thermal Energies= -1083.727091      |           |           |           |
| Sum of electronic and thermal Enthalpies= -1083.726147    |           |           |           |
| Sum of electronic and thermal Free Energies= -1083.808831 |           |           |           |

daec[n=6]-1-TS (dmf)

|   |           |           |           |
|---|-----------|-----------|-----------|
| C | -1.488662 | 3.406533  | -0.047365 |
| H | -2.044365 | 4.323835  | 0.127876  |
| C | -2.199333 | 2.194692  | -0.164940 |
| C | -1.461832 | 1.034583  | -0.396921 |
| H | -1.951031 | 0.075986  | -0.526096 |
| C | -0.065021 | 1.064546  | -0.478410 |
| H | 0.458885  | 0.130449  | -0.628373 |
| C | 0.634271  | 2.259479  | -0.359601 |
| O | 2.009879  | 2.395386  | -0.452520 |
| C | -0.093738 | 3.458818  | -0.149644 |
| O | 0.646924  | 4.595846  | -0.052965 |
| C | -0.039436 | 5.824858  | 0.165516  |
| H | -0.731239 | 6.053459  | -0.657383 |
| H | 0.736947  | 6.594450  | 0.208760  |
| H | -0.593807 | 5.815699  | 1.114544  |
| C | 4.605349  | -0.659823 | 0.721920  |
| H | 5.272059  | -1.449442 | 1.064730  |
| C | 3.689062  | -0.919375 | -0.309417 |
| C | 3.481596  | -2.314817 | -0.864128 |
| H | 4.432961  | -2.756821 | -1.192533 |
| H | 2.840016  | -2.250050 | -1.752690 |
| C | 2.823915  | -3.250813 | 0.187657  |
| H | 3.611740  | -3.655735 | 0.837614  |
| C | 2.002869  | -4.406637 | -0.418769 |
| H | 1.932304  | -5.221443 | 0.317809  |
| H | 2.547015  | -4.823862 | -1.279834 |



|   |           |           |           |
|---|-----------|-----------|-----------|
| C | 0.573449  | -4.020167 | -0.854627 |
| H | 0.159355  | -4.837136 | -1.465370 |
| C | -0.386956 | -3.743613 | 0.315883  |
| H | -0.002952 | -2.911473 | 0.924931  |
| H | -0.402448 | -4.622941 | 0.979893  |
| H | 0.610567  | -3.139057 | -1.514860 |
| H | 2.175344  | -2.654256 | 0.842780  |
| C | 2.858997  | 0.122779  | -0.747695 |
| H | 2.200071  | -0.047078 | -1.593322 |
| C | 2.856561  | 1.358275  | -0.091079 |
| C | 3.767272  | 1.610035  | 0.938969  |
| H | 3.766158  | 2.581719  | 1.426594  |
| C | 4.655420  | 0.601374  | 1.323474  |
| H | 5.373309  | 0.794893  | 2.118470  |
| C | -4.234313 | -2.876228 | 0.717770  |
| C | -1.826390 | -3.415163 | -0.115253 |
| H | -1.807221 | -2.562124 | -0.810212 |
| H | -2.239678 | -4.263163 | -0.685135 |
| C | -4.538419 | -1.647632 | -0.160987 |
| H | -5.582475 | -1.708207 | -0.505418 |
| C | -2.750786 | -3.103567 | 1.075306  |
| H | -2.356961 | -2.230363 | 1.617298  |
| H | -2.698505 | -3.942662 | 1.786558  |
| H | -3.923563 | -1.693435 | -1.072362 |
| C | -4.316734 | -0.285739 | 0.520100  |
| H | -3.333598 | -0.274572 | 1.005593  |
| H | -5.048161 | -0.155108 | 1.332508  |
| H | -4.812485 | -2.800111 | 1.652072  |
| H | -4.609332 | -3.774928 | 0.203584  |
| C | -4.429664 | 0.897701  | -0.467042 |
| H | -5.492844 | 1.123223  | -0.631712 |
| H | -4.035112 | 0.595209  | -1.448467 |
| C | -3.718178 | 2.193347  | -0.031787 |
| H | -4.115703 | 3.032902  | -0.620638 |
| H | -3.985480 | 2.421615  | 1.013086  |

Sum of electronic and zero-point Energies= -1123.021391

Sum of electronic and thermal Energies= -1122.996028

Sum of electronic and thermal Enthalpies= -1122.995083

Sum of electronic and thermal Free Energies= -1123.076513

daec[n=6]-1-E1 (dmf)

|   |           |           |           |
|---|-----------|-----------|-----------|
| C | -0.465725 | 2.998299  | -0.626438 |
| H | -0.793573 | 3.332492  | -1.606955 |
| C | -1.403161 | 2.944479  | 0.422185  |
| C | -0.974656 | 2.533851  | 1.689136  |
| H | -1.680617 | 2.497227  | 2.516385  |
| C | 0.360079  | 2.166919  | 1.901934  |
| H | 0.703703  | 1.846760  | 2.883218  |
| C | 1.277560  | 2.214345  | 0.859808  |
| O | 2.610728  | 1.932130  | 1.111701  |
| C | 0.872994  | 2.643540  | -0.424607 |
| O | 1.842587  | 2.680612  | -1.374207 |
| C | 1.477859  | 3.092177  | -2.690679 |
| H | 0.726110  | 2.420634  | -3.127489 |
| H | 2.396597  | 3.041828  | -3.281792 |
| H | 1.096513  | 4.122490  | -2.697416 |
| C | 4.403847  | -1.627135 | -0.113886 |
| H | 4.897859  | -2.545330 | -0.427569 |
| C | 3.016701  | -1.495756 | -0.269071 |
| C | 2.173622  | -2.623459 | -0.828910 |
| H | 2.769993  | -3.218530 | -1.535005 |
| H | 1.341482  | -2.193074 | -1.401015 |
| C | 1.616508  | -3.558547 | 0.267362  |
| H | 2.461345  | -4.060221 | 0.761713  |
| C | 0.637023  | -4.625246 | -0.257917 |
| H | 0.437235  | -5.344874 | 0.551143  |
| H | 1.132330  | -5.197371 | -1.057721 |
| C | -0.707252 | -4.088387 | -0.787335 |
| H | -1.249458 | -4.916379 | -1.269275 |
| C | -1.610616 | -3.461941 | 0.286141  |

|   |           |           |           |
|---|-----------|-----------|-----------|
| H | -1.048269 | -2.705418 | 0.853295  |
| H | -1.897848 | -4.236408 | 1.015599  |
| H | -0.525565 | -3.349971 | -1.582737 |
| H | 1.130401  | -2.951409 | 1.043798  |
| C | 2.396149  | -0.302143 | 0.134535  |
| H | 1.320662  | -0.191717 | 0.020121  |
| C | 3.151654  | 0.740868  | 0.676607  |
| C | 4.537298  | 0.606101  | 0.832326  |
| H | 5.108057  | 1.429554  | 1.255041  |
| C | 5.153484  | -0.580686 | 0.435633  |
| H | 6.230820  | -0.686932 | 0.551166  |
| C | -4.985962 | -1.401173 | 0.266121  |
| C | -2.870557 | -2.796068 | -0.285957 |
| H | -2.560158 | -2.015200 | -0.996294 |
| H | -3.447507 | -3.529237 | -0.872564 |
| C | -4.662287 | -0.132312 | -0.546434 |
| H | -5.611341 | 0.302387  | -0.897150 |
| C | -3.773240 | -2.187683 | 0.798000  |
| H | -3.167901 | -1.536869 | 1.446710  |
| H | -4.140648 | -2.996788 | 1.448111  |
| H | -4.103349 | -0.401308 | -1.455397 |
| C | -3.879399 | 0.939953  | 0.226588  |
| H | -2.905725 | 0.537099  | 0.537756  |
| H | -4.418701 | 1.187036  | 1.155582  |
| H | -5.619461 | -1.117495 | 1.121107  |
| H | -5.600235 | -2.070104 | -0.356930 |
| C | -3.658332 | 2.224268  | -0.583869 |
| H | -4.634309 | 2.650486  | -0.861164 |
| H | -3.149520 | 1.980326  | -1.529090 |
| C | -2.849875 | 3.314952  | 0.156911  |
| H | -2.881125 | 4.234899  | -0.444215 |
| H | -3.346615 | 3.544191  | 1.109976  |

Sum of electronic and zero-point Energies= -1123.039892

Sum of electronic and thermal Energies= -1123.013673

Sum of electronic and thermal Enthalpies= -1123.012729

Sum of electronic and thermal Free Energies= -1123.097064

daec[n=6]-1-E2 (dmf)

|   |           |           |           |
|---|-----------|-----------|-----------|
| C | -0.972651 | 2.526105  | 0.788638  |
| H | -1.584924 | 2.382796  | 1.674111  |
| C | -1.592666 | 2.920070  | -0.410323 |
| C | -0.797300 | 3.126123  | -1.544774 |
| H | -1.255973 | 3.443293  | -2.479565 |
| C | 0.586946  | 2.934992  | -1.484661 |
| H | 1.214653  | 3.103184  | -2.357177 |
| C | 1.191839  | 2.538574  | -0.296769 |
| O | 2.573163  | 2.446489  | -0.226550 |
| C | 0.413133  | 2.329466  | 0.861669  |
| O | 1.089095  | 1.952994  | 1.977287  |
| C | 0.339662  | 1.711480  | 3.167089  |
| H | -0.179796 | 2.618460  | 3.505453  |
| H | 1.071604  | 1.410421  | 3.921889  |
| H | -0.390574 | 0.903039  | 3.024483  |
| C | 4.579373  | -1.204392 | -0.389178 |
| H | 5.130942  | -2.141742 | -0.441187 |
| C | 3.200325  | -1.193604 | -0.643869 |
| C | 2.448379  | -2.471847 | -0.954313 |
| H | 3.085916  | -3.143620 | -1.546895 |
| H | 1.578043  | -2.229710 | -1.577654 |
| C | 1.983533  | -3.219572 | 0.315046  |
| H | 2.872600  | -3.544171 | 0.875169  |
| C | 1.095452  | -4.444736 | 0.025746  |
| H | 0.986411  | -5.026863 | 0.953930  |
| H | 1.620387  | -5.101791 | -0.684854 |
| C | -0.307727 | -4.126533 | -0.526781 |
| H | -0.774947 | -5.064755 | -0.863096 |
| C | -1.242915 | -3.439773 | 0.480346  |
| H | -0.741630 | -2.563955 | 0.918517  |
| H | -1.439214 | -4.127463 | 1.318754  |
| H | -0.220008 | -3.498830 | -1.426441 |

|                                                           |           |           |           |
|-----------------------------------------------------------|-----------|-----------|-----------|
| H                                                         | 1.453081  | -2.516049 | 0.972147  |
| C                                                         | 2.505610  | 0.025264  | -0.581465 |
| H                                                         | 1.438553  | 0.046280  | -0.788567 |
| C                                                         | 3.179568  | 1.209258  | -0.268053 |
| C                                                         | 4.557002  | 1.195254  | -0.014618 |
| H                                                         | 5.064427  | 2.127660  | 0.221412  |
| C                                                         | 5.247617  | -0.015220 | -0.077653 |
| H                                                         | 6.319110  | -0.028678 | 0.114668  |
| C                                                         | -4.798411 | -1.719084 | 0.310532  |
| C                                                         | -2.573059 | -2.976840 | -0.131224 |
| H                                                         | -2.355897 | -2.273465 | -0.949062 |
| H                                                         | -3.089783 | -3.832658 | -0.594961 |
| C                                                         | -4.616545 | -0.544677 | -0.670634 |
| H                                                         | -5.613771 | -0.228515 | -1.014580 |
| C                                                         | -3.504391 | -2.314714 | 0.895193  |
| H                                                         | -2.948873 | -1.530497 | 1.431338  |
| H                                                         | -3.777500 | -3.060235 | 1.658025  |
| H                                                         | -4.083782 | -0.884956 | -1.571327 |
| C                                                         | -3.883251 | 0.670342  | -0.081774 |
| H                                                         | -2.851359 | 0.392025  | 0.172773  |
| H                                                         | -4.363946 | 0.963055  | 0.866012  |
| H                                                         | -5.433059 | -1.381648 | 1.144887  |
| H                                                         | -5.363474 | -2.517088 | -0.196288 |
| C                                                         | -3.865191 | 1.879309  | -1.026753 |
| H                                                         | -4.900821 | 2.188954  | -1.233259 |
| H                                                         | -3.432115 | 1.586893  | -1.995655 |
| C                                                         | -3.096350 | 3.106626  | -0.481804 |
| H                                                         | -3.314829 | 3.965351  | -1.131568 |
| H                                                         | -3.485406 | 3.358185  | 0.514996  |
| Sum of electronic and zero-point Energies= -1123.039771   |           |           |           |
| Sum of electronic and thermal Energies= -1123.013454      |           |           |           |
| Sum of electronic and thermal Enthalpies= -1123.012510    |           |           |           |
| Sum of electronic and thermal Free Energies= -1123.097538 |           |           |           |

daec[n=6]-2-TS (dmf)

|   |           |           |           |
|---|-----------|-----------|-----------|
| C | 2.141307  | 2.961956  | -0.022300 |
| H | 2.859386  | 3.742633  | 0.214262  |
| C | 2.616425  | 1.662174  | -0.291718 |
| C | 1.675435  | 0.679403  | -0.596601 |
| H | 1.981461  | -0.332810 | -0.836710 |
| C | 0.304003  | 0.963939  | -0.605316 |
| H | -0.390908 | 0.161712  | -0.819013 |
| C | -0.160749 | 2.244841  | -0.335759 |
| O | -1.490373 | 2.628728  | -0.343210 |
| C | 0.777076  | 3.269641  | -0.048747 |
| O | 0.255680  | 4.502293  | 0.195305  |
| C | 1.158393  | 5.560538  | 0.502735  |
| H | 1.731068  | 5.350566  | 1.417165  |
| H | 0.535027  | 6.445295  | 0.662379  |
| H | 1.854443  | 5.751879  | -0.326131 |
| C | -4.598132 | 0.004931  | 0.595343  |
| H | -5.410876 | -0.666716 | 0.865685  |
| C | -3.811834 | -0.270401 | -0.535702 |
| C | -4.024056 | -1.521918 | -1.369650 |
| H | -3.260184 | -1.552352 | -2.156961 |
| H | -4.993772 | -1.463352 | -1.887111 |
| C | -4.000847 | -2.845120 | -0.565236 |
| H | -4.907524 | -2.895589 | 0.054767  |
| C | -2.785427 | -3.071403 | 0.352219  |
| H | -2.965347 | -3.991779 | 0.929074  |
| H | -2.739982 | -2.259605 | 1.093390  |
| C | -1.416888 | -3.188186 | -0.337924 |
| H | -1.220582 | -2.287852 | -0.939771 |
| C | -0.275910 | -3.372323 | 0.676928  |
| H | -0.473481 | -4.269669 | 1.285064  |
| H | -0.291578 | -2.523173 | 1.378918  |
| H | -1.429270 | -4.033446 | -1.044639 |
| H | -4.081281 | -3.674409 | -1.284190 |
| C | -2.786666 | 0.626404  | -0.871672 |
| H | -2.208544 | 0.460353  | -1.776271 |

|   |           |           |           |
|---|-----------|-----------|-----------|
| C | -2.499431 | 1.723157  | -0.050529 |
| C | -3.280767 | 1.986598  | 1.077047  |
| H | -3.050740 | 2.850446  | 1.695784  |
| C | -4.341683 | 1.129839  | 1.383585  |
| H | -4.960455 | 1.333775  | 2.255558  |
| C | 3.673932  | -3.677847 | 0.587249  |
| C | 1.128464  | -3.477396 | 0.061482  |
| H | 1.184769  | -4.367697 | -0.585546 |
| H | 1.295354  | -2.611463 | -0.595950 |
| C | 4.163120  | -2.535406 | -0.323185 |
| H | 3.512218  | -2.474885 | -1.208313 |
| C | 2.235740  | -3.543937 | 1.127542  |
| H | 2.038253  | -4.402533 | 1.788254  |
| H | 2.162974  | -2.653535 | 1.769970  |
| H | 5.161657  | -2.795495 | -0.707820 |
| C | 4.224353  | -1.148584 | 0.338402  |
| H | 4.972107  | -1.153544 | 1.146560  |
| H | 3.264763  | -0.934420 | 0.823942  |
| H | 3.755282  | -4.623677 | 0.029013  |
| H | 4.358833  | -3.773254 | 1.444459  |
| C | 4.559187  | -0.023789 | -0.665471 |
| H | 4.105915  | -0.255246 | -1.640880 |
| H | 5.644384  | -0.008420 | -0.839966 |
| C | 4.115445  | 1.387083  | -0.238037 |
| H | 4.476060  | 1.588226  | 0.783767  |
| H | 4.625192  | 2.126721  | -0.873620 |

Sum of electronic and zero-point Energies= -1123.025619

Sum of electronic and thermal Energies= -1123.000371

Sum of electronic and thermal Enthalpies= -1122.999427

Sum of electronic and thermal Free Energies= -1123.080206

daec[n=6]-2-E1 (dmf)

|   |           |           |           |
|---|-----------|-----------|-----------|
| C | 0.860399  | 2.797455  | -0.589363 |
| H | 1.153761  | 3.194986  | -1.557134 |
| C | 1.854875  | 2.558876  | 0.377301  |
| C | 1.470210  | 2.067084  | 1.630127  |
| H | 2.220076  | 1.889658  | 2.398252  |
| C | 0.122889  | 1.809353  | 1.907709  |
| H | -0.186978 | 1.437456  | 2.881910  |
| C | -0.854497 | 2.049100  | 0.948464  |
| O | -2.185567 | 1.915942  | 1.306197  |
| C | -0.493041 | 2.559788  | -0.318639 |
| O | -1.514448 | 2.796724  | -1.181446 |
| C | -1.196377 | 3.299343  | -2.478324 |
| H | -0.703892 | 4.279505  | -2.418823 |
| H | -2.153081 | 3.405564  | -2.997331 |
| H | -0.555662 | 2.600819  | -3.033731 |
| C | -4.726785 | -1.060335 | -0.118622 |
| H | -5.416972 | -1.821044 | -0.480021 |
| C | -3.378895 | -1.106123 | -0.507749 |
| C | -2.887004 | -2.220617 | -1.411980 |
| H | -2.000892 | -1.882701 | -1.964195 |
| H | -3.660788 | -2.429045 | -2.163932 |
| C | -2.571645 | -3.547490 | -0.678028 |
| H | -3.464555 | -3.854097 | -0.113606 |
| C | -1.362024 | -3.509864 | 0.271453  |
| H | -1.330853 | -4.455246 | 0.834604  |
| H | -1.506719 | -2.715947 | 1.019950  |
| C | -0.014090 | -3.301661 | -0.433926 |
| H | -0.046797 | -2.374385 | -1.024878 |
| C | 1.181436  | -3.218814 | 0.525612  |
| H | 1.299050  | -4.173294 | 1.062892  |
| H | 0.968644  | -2.459315 | 1.295036  |
| H | 0.148282  | -4.116228 | -1.158046 |
| H | -2.406603 | -4.325379 | -1.439129 |
| C | -2.502337 | -0.111038 | -0.043198 |
| H | -1.456410 | -0.131749 | -0.338325 |
| C | -2.973184 | 0.911027  | 0.788527  |
| C | -4.318924 | 0.951712  | 1.172911  |
| H | -4.662231 | 1.756693  | 1.818379  |

|   |           |           |           |
|---|-----------|-----------|-----------|
| C | -5.188372 | -0.038684 | 0.716250  |
| H | -6.236341 | -0.006690 | 1.009367  |
| C | 4.950279  | -2.082513 | 0.106550  |
| C | 2.491617  | -2.847425 | -0.184000 |
| H | 2.757254  | -3.630290 | -0.912591 |
| H | 2.312944  | -1.935455 | -0.771907 |
| C | 4.791468  | -0.769773 | -0.686987 |
| H | 4.173952  | -0.950874 | -1.579375 |
| C | 3.667466  | -2.614414 | 0.775436  |
| H | 3.906378  | -3.555461 | 1.294555  |
| H | 3.349993  | -1.913357 | 1.561676  |
| H | 5.780906  | -0.469572 | -1.065489 |
| C | 4.179757  | 0.390206  | 0.111879  |
| H | 4.804945  | 0.601628  | 0.994609  |
| H | 3.198279  | 0.087790  | 0.500232  |
| H | 5.351423  | -2.852002 | -0.571383 |
| H | 5.713212  | -1.938978 | 0.887490  |
| C | 4.012800  | 1.673851  | -0.711795 |
| H | 3.443975  | 1.450612  | -1.627580 |
| H | 5.000547  | 2.029831  | -1.041429 |
| C | 3.311264  | 2.825976  | 0.046115  |
| H | 3.862839  | 3.029710  | 0.974748  |
| H | 3.378733  | 3.735409  | -0.567129 |

Sum of electronic and zero-point Energies= -1123.039036

Sum of electronic and thermal Energies= -1123.012807

Sum of electronic and thermal Enthalpies= -1123.011863

Sum of electronic and thermal Free Energies= -1123.095829

daec[n=6]-2-E2 (dmf)

|   |           |           |           |
|---|-----------|-----------|-----------|
| C | 1.338325  | 2.185710  | 0.742389  |
| H | 1.972111  | 1.949289  | 1.591860  |
| C | 1.938823  | 2.596047  | -0.461798 |
| C | 1.115540  | 2.922375  | -1.546926 |
| H | 1.558929  | 3.250674  | -2.485244 |
| C | -0.277048 | 2.851492  | -1.429146 |
| H | -0.924038 | 3.130800  | -2.257982 |
| C | -0.863065 | 2.449282  | -0.233654 |
| O | -2.237417 | 2.525684  | -0.076956 |
| C | -0.054501 | 2.100835  | 0.870333  |
| O | -0.712201 | 1.724624  | 1.996969  |
| C | 0.062920  | 1.372140  | 3.141629  |
| H | 0.717629  | 0.514316  | 2.934936  |
| H | -0.659655 | 1.098746  | 3.915721  |
| H | 0.669170  | 2.218613  | 3.492438  |
| C | -4.791198 | -0.757470 | -0.285660 |
| H | -5.490870 | -1.588959 | -0.353293 |
| C | -3.499331 | -0.891953 | -0.819338 |
| C | -3.086368 | -2.187668 | -1.493285 |
| H | -2.182179 | -2.017590 | -2.091148 |
| H | -3.874789 | -2.480131 | -2.201744 |
| C | -2.861599 | -3.372236 | -0.523658 |
| H | -3.777591 | -3.519879 | 0.066838  |
| C | -1.664767 | -3.227713 | 0.431216  |
| H | -1.695857 | -4.055047 | 1.156794  |
| H | -1.773610 | -2.303602 | 1.019603  |
| C | -0.296896 | -3.224949 | -0.266071 |
| H | -0.256331 | -2.402840 | -0.995881 |
| C | 0.885565  | -3.072348 | 0.700533  |
| H | 0.925355  | -3.935955 | 1.383293  |
| H | 0.713003  | -2.189046 | 1.336433  |
| H | -0.181621 | -4.153645 | -0.847866 |
| H | -2.733888 | -4.285225 | -1.125043 |
| C | -2.613433 | 0.194854  | -0.735269 |
| H | -1.614031 | 0.113332  | -1.156179 |
| C | -3.020840 | 1.392718  | -0.135808 |
| C | -4.310181 | 1.521539  | 0.392288  |
| H | -4.605257 | 2.462958  | 0.849457  |
| C | -5.188683 | 0.440231  | 0.314342  |
| H | -6.194069 | 0.537795  | 0.720456  |
| C | 4.730828  | -2.263678 | 0.236763  |

|   |          |           |           |
|---|----------|-----------|-----------|
| C | 2.232368 | -2.905966 | -0.017627 |
| H | 2.457026 | -3.809993 | -0.606204 |
| H | 2.132275 | -2.088035 | -0.745820 |
| C | 4.683481 | -1.073043 | -0.742227 |
| H | 4.096100 | -1.347187 | -1.631280 |
| C | 3.399495 | -2.604929 | 0.933369  |
| H | 3.560967 | -3.468756 | 1.596589  |
| H | 3.112725 | -1.772670 | 1.593573  |
| H | 5.704845 | -0.882520 | -1.106881 |
| C | 4.106784 | 0.219836  | -0.147455 |
| H | 4.670086 | 0.493702  | 0.759514  |
| H | 3.073554 | 0.040670  | 0.178069  |
| H | 5.093593 | -3.149107 | -0.308211 |
| H | 5.482927 | -2.056797 | 1.013973  |
| C | 4.124553 | 1.400490  | -1.126976 |
| H | 3.634176 | 1.108034  | -2.068217 |
| H | 5.166502 | 1.643275  | -1.384538 |
| C | 3.448794 | 2.683817  | -0.586881 |
| H | 3.885859 | 2.931352  | 0.391107  |
| H | 3.696481 | 3.514492  | -1.261727 |

Sum of electronic and zero-point Energies= -1123.038727

Sum of electronic and thermal Energies= -1123.012503

Sum of electronic and thermal Enthalpies= -1123.011559

Sum of electronic and thermal Free Energies= -1123.095668

daec[n=6]-3-TS (dmf)

|   |           |           |           |
|---|-----------|-----------|-----------|
| C | 3.032553  | -2.113514 | -0.134141 |
| H | 3.964543  | -2.641054 | 0.050971  |
| C | 3.058032  | -0.708260 | -0.240208 |
| C | 1.850468  | -0.052148 | -0.475344 |
| H | 1.815333  | 1.026461  | -0.581338 |
| C | 0.648797  | -0.763604 | -0.586729 |
| H | -0.268781 | -0.213252 | -0.752872 |
| C | 0.626716  | -2.148843 | -0.481050 |
| O | -0.506196 | -2.935247 | -0.615752 |
| C | 1.843883  | -2.841056 | -0.256978 |
| O | 1.752725  | -4.195334 | -0.168490 |
| C | 2.950533  | -4.932158 | 0.058714  |
| H | 2.650253  | -5.983656 | 0.090510  |
| H | 3.417938  | -4.659931 | 1.015521  |
| H | 3.675450  | -4.786527 | -0.754484 |
| C | -4.222941 | -1.750009 | 0.875226  |
| H | -5.186494 | -1.452554 | 1.285872  |
| C | -3.658618 | -1.014497 | -0.179297 |
| C | -4.292480 | 0.266695  | -0.684439 |
| H | -5.338715 | 0.096610  | -0.975916 |
| H | -3.762883 | 0.585717  | -1.591087 |
| C | -4.240284 | 1.396464  | 0.380869  |
| H | -3.363245 | 1.245034  | 1.023178  |
| C | -4.198675 | 2.821984  | -0.202590 |
| H | -4.452206 | 3.535052  | 0.596926  |
| H | -4.987376 | 2.925979  | -0.963708 |
| C | -2.845557 | 3.236499  | -0.817024 |
| H | -2.970404 | 4.215852  | -1.304272 |
| C | -1.688208 | 3.323262  | 0.192155  |
| H | -1.547083 | 2.345548  | 0.675644  |
| H | -1.959012 | 4.023777  | 0.998470  |
| H | -2.570165 | 2.535283  | -1.620162 |
| H | -5.112421 | 1.299444  | 1.042135  |
| C | -2.426933 | -1.432514 | -0.705176 |
| H | -2.009960 | -0.911733 | -1.562327 |
| C | -1.732591 | -2.502937 | -0.131062 |
| C | -2.295856 | -3.226854 | 0.923132  |
| H | -1.748410 | -4.065421 | 1.346335  |
| C | -3.552380 | -2.854221 | 1.409126  |
| H | -4.001436 | -3.419891 | 2.223518  |
| C | 2.186526  | 4.027731  | -0.074582 |
| C | -0.349357 | 3.751379  | -0.429875 |
| H | -0.429878 | 4.780129  | -0.815837 |
| H | -0.140222 | 3.114713  | -1.304689 |

|                                                           |          |           |           |
|-----------------------------------------------------------|----------|-----------|-----------|
| C                                                         | 3.408298 | 3.749417  | 0.826405  |
| H                                                         | 3.238113 | 4.221190  | 1.806650  |
| C                                                         | 0.832087 | 3.650966  | 0.548960  |
| H                                                         | 0.874117 | 2.621609  | 0.933756  |
| H                                                         | 0.644122 | 4.294111  | 1.423632  |
| H                                                         | 4.288323 | 4.253838  | 0.397412  |
| C                                                         | 3.748674 | 2.260225  | 1.041690  |
| H                                                         | 2.855208 | 1.725532  | 1.389746  |
| H                                                         | 4.479960 | 2.177823  | 1.860023  |
| H                                                         | 2.173560 | 5.098542  | -0.329710 |
| H                                                         | 2.304703 | 3.496609  | -1.031186 |
| C                                                         | 4.334274 | 1.562159  | -0.201698 |
| H                                                         | 5.358131 | 1.932028  | -0.357838 |
| H                                                         | 3.776319 | 1.850315  | -1.103246 |
| C                                                         | 4.388421 | 0.025837  | -0.116277 |
| H                                                         | 4.869119 | -0.269154 | 0.830022  |
| H                                                         | 5.058974 | -0.345399 | -0.906565 |
| Sum of electronic and zero-point Energies= -1123.024189   |          |           |           |
| Sum of electronic and thermal Energies= -1122.998857      |          |           |           |
| Sum of electronic and thermal Enthalpies= -1122.997912    |          |           |           |
| Sum of electronic and thermal Free Energies= -1123.079131 |          |           |           |

daec[n=6]-3-E1 (dmf)

|   |           |           |           |
|---|-----------|-----------|-----------|
| C | 1.718729  | -2.305452 | 0.582209  |
| H | 2.355904  | -2.232776 | 1.458301  |
| C | 2.309339  | -2.287359 | -0.694104 |
| C | 1.483026  | -2.408281 | -1.819285 |
| H | 1.920620  | -2.406402 | -2.815899 |
| C | 0.099890  | -2.555828 | -1.673710 |
| H | -0.543849 | -2.677331 | -2.542400 |
| C | -0.476096 | -2.572799 | -0.407668 |
| O | -1.827437 | -2.843191 | -0.255229 |
| C | 0.331421  | -2.435547 | 0.741473  |
| O | -0.315939 | -2.458384 | 1.934534  |
| C | 0.462911  | -2.327457 | 3.122590  |
| H | -0.251585 | -2.361044 | 3.950015  |
| H | 1.002587  | -1.370738 | 3.146079  |
| H | 1.179041  | -3.154172 | 3.226913  |
| C | -4.773739 | 0.104062  | -0.352491 |
| H | -5.566226 | 0.849788  | -0.389947 |
| C | -3.440941 | 0.495340  | -0.543286 |
| C | -3.072968 | 1.949003  | -0.761878 |
| H | -3.838334 | 2.438832  | -1.381120 |
| H | -2.133372 | 1.993940  | -1.326607 |
| C | -2.919519 | 2.734058  | 0.559375  |
| H | -2.261215 | 2.169896  | 1.234265  |
| C | -2.383668 | 4.168128  | 0.385912  |
| H | -2.357359 | 4.644936  | 1.378001  |
| H | -3.100370 | 4.750943  | -0.213199 |
| C | -0.989480 | 4.283803  | -0.262570 |
| H | -0.713887 | 5.348608  | -0.309694 |
| C | 0.112940  | 3.502598  | 0.465741  |
| H | -0.190569 | 2.450285  | 0.562566  |
| H | 0.215615  | 3.882713  | 1.495017  |
| H | -1.038035 | 3.942528  | -1.307555 |
| H | -3.897264 | 2.777905  | 1.061110  |
| C | -2.430632 | -0.480579 | -0.502789 |
| H | -1.395160 | -0.189075 | -0.659674 |
| C | -2.752125 | -1.822574 | -0.278571 |
| C | -4.084988 | -2.209033 | -0.084506 |
| H | -4.314563 | -3.258322 | 0.085147  |
| C | -5.087310 | -1.240141 | -0.123071 |
| H | -6.124146 | -1.539093 | 0.021419  |
| C | 3.828875  | 2.476722  | -0.324341 |
| C | 1.478229  | 3.535224  | -0.236284 |
| H | 1.870032  | 4.564460  | -0.258732 |
| H | 1.346546  | 3.234514  | -1.288154 |
| C | 4.834244  | 1.511605  | 0.333632  |
| H | 5.045037  | 1.868492  | 1.353831  |
| C | 2.496006  | 2.596639  | 0.427542  |

|                                                           |          |           |           |
|-----------------------------------------------------------|----------|-----------|-----------|
| H                                                         | 2.034863 | 1.601972  | 0.515180  |
| H                                                         | 2.688580 | 2.932959  | 1.459285  |
| H                                                         | 5.790192 | 1.566990  | -0.210423 |
| C                                                         | 4.391584 | 0.037497  | 0.413244  |
| H                                                         | 3.423719 | -0.031038 | 0.928079  |
| H                                                         | 5.107028 | -0.508119 | 1.047892  |
| H                                                         | 4.295050 | 3.471718  | -0.395125 |
| H                                                         | 3.632084 | 2.163110  | -1.360798 |
| C                                                         | 4.312240 | -0.676665 | -0.944022 |
| H                                                         | 5.315697 | -0.682169 | -1.395994 |
| H                                                         | 3.666161 | -0.119884 | -1.637582 |
| C                                                         | 3.810445 | -2.140300 | -0.863056 |
| H                                                         | 4.329631 | -2.650384 | -0.038812 |
| H                                                         | 4.104078 | -2.657423 | -1.786352 |
| Sum of electronic and zero-point Energies= -1123.037537   |          |           |           |
| Sum of electronic and thermal Energies= -1123.011324      |          |           |           |
| Sum of electronic and thermal Enthalpies= -1123.010380    |          |           |           |
| Sum of electronic and thermal Free Energies= -1123.094960 |          |           |           |

daec[n=6]-3-E2 (dmf)

|   |           |           |           |
|---|-----------|-----------|-----------|
| C | -1.322653 | 2.554571  | -0.804338 |
| H | -1.697142 | 2.670416  | -1.817687 |
| C | -2.246148 | 2.416791  | 0.248849  |
| C | -1.760002 | 2.290919  | 1.555463  |
| H | -2.453830 | 2.202412  | 2.388775  |
| C | -0.381373 | 2.288346  | 1.801983  |
| H | 0.005521  | 2.197253  | 2.814625  |
| C | 0.524447  | 2.425489  | 0.756347  |
| O | 1.873755  | 2.542920  | 1.047154  |
| C | 0.057099  | 2.572665  | -0.569521 |
| O | 1.008037  | 2.736150  | -1.524714 |
| C | 0.584453  | 2.867977  | -2.880757 |
| H | 1.501150  | 2.970399  | -3.468255 |
| H | -0.039549 | 3.761201  | -3.020964 |
| H | 0.032997  | 1.979506  | -3.217378 |
| C | 4.702491  | -0.333599 | -0.004478 |
| H | 5.462612  | -1.064974 | -0.274357 |
| C | 3.345620  | -0.651599 | -0.159544 |
| C | 2.906231  | -2.012858 | -0.659909 |
| H | 3.651617  | -2.410740 | -1.363209 |
| H | 1.971370  | -1.896270 | -1.222654 |
| C | 2.695381  | -3.032201 | 0.481201  |
| H | 2.060440  | -2.575792 | 1.252993  |
| C | 2.084412  | -4.372649 | 0.029773  |
| H | 2.015225  | -5.029841 | 0.910426  |
| H | 2.777910  | -4.868872 | -0.666693 |
| C | 0.697516  | -4.280619 | -0.637939 |
| H | 0.363525  | -5.298861 | -0.890167 |
| C | -0.373255 | -3.589226 | 0.217600  |
| H | -0.012920 | -2.594748 | 0.517679  |
| H | -0.517972 | -4.152362 | 1.153713  |
| H | 0.784424  | -3.749945 | -1.597975 |
| H | 3.663525  | -3.226978 | 0.965553  |
| C | 2.377712  | 0.305809  | 0.186366  |
| H | 1.322453  | 0.070180  | 0.071358  |
| C | 2.762743  | 1.559243  | 0.668812  |
| C | 4.118813  | 1.872816  | 0.825598  |
| H | 4.398147  | 2.854128  | 1.201772  |
| C | 5.080523  | 0.920476  | 0.487855  |
| H | 6.135495  | 1.163195  | 0.603573  |
| C | -4.009992 | -2.219085 | -0.404685 |
| C | -1.723405 | -3.406766 | -0.490894 |
| H | -2.172338 | -4.388140 | -0.711644 |
| H | -1.552580 | -2.922101 | -1.465666 |
| C | -4.979367 | -1.339592 | 0.408916  |
| H | -5.233240 | -1.868574 | 1.340772  |
| C | -2.701788 | -2.551064 | 0.326694  |
| H | -2.189843 | -1.617660 | 0.603252  |
| H | -2.933850 | -3.061694 | 1.275393  |
| H | -5.923313 | -1.240146 | -0.149651 |

|   |           |           |           |
|---|-----------|-----------|-----------|
| C | -4.465190 | 0.067449  | 0.770928  |
| H | -3.513663 | -0.013235 | 1.314218  |
| H | -5.174450 | 0.526210  | 1.477208  |
| H | -4.525567 | -3.156294 | -0.665867 |
| H | -3.774378 | -1.729659 | -1.361925 |
| C | -4.299369 | 1.013040  | -0.427574 |
| H | -5.281433 | 1.156075  | -0.903407 |
| H | -3.651158 | 0.559186  | -1.190787 |
| C | -3.732015 | 2.405806  | -0.058312 |
| H | -4.288476 | 2.801275  | 0.803366  |
| H | -3.922357 | 3.090066  | -0.896502 |

Sum of electronic and zero-point Energies= -1123.038503

Sum of electronic and thermal Energies= -1123.012250

Sum of electronic and thermal Enthalpies= -1123.011306

Sum of electronic and thermal Free Energies= -1123.095615

daec[n=7]-1-TS (dmf)

|   |           |           |           |
|---|-----------|-----------|-----------|
| C | -3.303695 | 2.129574  | 0.002968  |
| H | -4.107749 | 2.849703  | 0.127410  |
| C | -1.971522 | 2.579592  | 0.092289  |
| C | -0.958895 | 1.634860  | -0.083527 |
| H | 0.085690  | 1.919744  | -0.055149 |
| C | -1.254698 | 0.288363  | -0.314241 |
| H | -0.434951 | -0.409407 | -0.425931 |
| C | -2.569808 | -0.154249 | -0.393674 |
| O | -2.944369 | -1.464849 | -0.646771 |
| C | -3.618216 | 0.785824  | -0.240703 |
| O | -4.882546 | 0.293511  | -0.342041 |
| C | -5.968847 | 1.200345  | -0.176860 |
| H | -5.956287 | 1.990415  | -0.940793 |
| H | -5.963735 | 1.659945  | 0.821600  |
| H | -6.876220 | 0.600434  | -0.293340 |
| C | -0.648402 | -4.622395 | 0.834483  |
| H | -0.055050 | -5.434960 | 1.251114  |
| C | -0.095326 | -3.799248 | -0.158605 |
| C | 1.361811  | -3.916105 | -0.557528 |
| H | 1.503655  | -3.505235 | -1.565893 |
| H | 1.669063  | -4.971008 | -0.590312 |
| C | 2.259023  | -3.161050 | 0.453636  |
| H | 1.881190  | -2.134726 | 0.566368  |
| C | 3.757592  | -3.130181 | 0.106614  |
| H | 4.092193  | -4.153416 | -0.124829 |
| H | 4.312270  | -2.832587 | 1.008220  |
| C | 4.167881  | -2.206775 | -1.057370 |
| H | 3.667634  | -2.533399 | -1.981617 |
| C | 3.903747  | -0.698622 | -0.864655 |
| H | 2.820984  | -0.508301 | -0.851840 |
| H | 4.287062  | -0.177408 | -1.756213 |
| H | 5.245490  | -2.349344 | -1.233968 |
| H | 2.133176  | -3.636092 | 1.437501  |
| C | -0.885318 | -2.771514 | -0.695634 |
| H | -0.492689 | -2.164377 | -1.506573 |
| C | -2.156967 | -2.507604 | -0.175991 |
| C | -2.702360 | -3.329095 | 0.814422  |
| H | -3.700183 | -3.119276 | 1.191818  |
| C | -1.947770 | -4.400257 | 1.300432  |
| H | -2.369234 | -5.050535 | 2.064841  |
| C | 3.299281  | 2.192120  | 0.233576  |
| C | 4.551173  | -0.084069 | 0.390143  |
| H | 4.002475  | -0.410215 | 1.286630  |
| H | 5.571961  | -0.483795 | 0.498525  |
| C | 2.207685  | 4.502313  | -0.164324 |
| H | 2.454329  | 5.573234  | -0.222265 |
| H | 2.031140  | 4.179738  | -1.524273 |
| C | 4.639899  | 1.455010  | 0.385469  |
| H | 5.310309  | 1.772304  | -0.429516 |
| C | 0.905520  | 4.319961  | 0.642674  |
| H | 0.917174  | 4.980057  | 1.523418  |
| H | 5.125070  | 1.778617  | 1.319855  |
| H | 0.867360  | 3.302688  | 1.046453  |

|   |           |          |           |
|---|-----------|----------|-----------|
| C | -0.362293 | 4.603153 | -0.192580 |
| H | -0.227531 | 4.196011 | -1.205455 |
| H | -0.464103 | 5.690799 | -0.318719 |
| H | 2.586818  | 1.807265 | 0.978818  |
| C | 3.427539  | 3.723208 | 0.364238  |
| H | 4.312600  | 4.049953 | -0.203634 |
| H | 3.625943  | 3.990107 | 1.414400  |
| C | -1.684768 | 4.048860 | 0.383163  |
| H | -2.522104 | 4.641300 | -0.010393 |
| H | 2.868245  | 1.957719 | -0.751527 |
| H | -1.700265 | 4.212629 | 1.473488  |

Sum of electronic and zero-point Energies= -1162.304885

Sum of electronic and thermal Energies= -1162.278231

Sum of electronic and thermal Enthalpies= -1162.277286

Sum of electronic and thermal Free Energies= -1162.361838

daec[n=7]-1-E1 (dmf)

|   |           |           |           |
|---|-----------|-----------|-----------|
| C | -2.072733 | 2.936811  | -0.272319 |
| H | -2.124142 | 3.762664  | -0.976368 |
| C | -1.289336 | 3.080231  | 0.887294  |
| C | -1.233062 | 2.016239  | 1.794385  |
| H | -0.641897 | 2.108388  | 2.703611  |
| C | -1.945281 | 0.835586  | 1.552819  |
| H | -1.913718 | 0.014759  | 2.266210  |
| C | -2.711218 | 0.699412  | 0.398853  |
| O | -3.509123 | -0.406250 | 0.170858  |
| C | -2.782064 | 1.758562  | -0.533681 |
| O | -3.558182 | 1.544428  | -1.628193 |
| C | -3.670282 | 2.597168  | -2.583089 |
| H | -2.695469 | 2.847842  | -3.024191 |
| H | -4.112259 | 3.499649  | -2.138446 |
| H | -4.333795 | 2.217803  | -3.365562 |
| C | -2.099156 | -4.322163 | 0.267209  |
| H | -1.760130 | -5.356768 | 0.280254  |
| C | -1.216624 | -3.310994 | -0.143064 |
| C | 0.205749  | -3.649587 | -0.543987 |
| H | 0.485591  | -3.070458 | -1.434391 |
| H | 0.252187  | -4.710075 | -0.829293 |
| C | 1.229498  | -3.390501 | 0.583199  |
| H | 1.290241  | -2.309091 | 0.773298  |
| C | 2.629654  | -3.968082 | 0.307709  |
| H | 2.544424  | -5.063136 | 0.229055  |
| H | 3.259432  | -3.779690 | 1.189377  |
| C | 3.347741  | -3.453460 | -0.954541 |
| H | 2.772254  | -3.746967 | -1.845012 |
| C | 3.605264  | -1.937086 | -1.015086 |
| H | 2.645153  | -1.401932 | -1.019444 |
| H | 4.081233  | -1.707833 | -1.981840 |
| H | 4.311976  | -3.979512 | -1.035109 |
| H | 0.850140  | -3.840891 | 1.512321  |
| C | -1.668535 | -1.981264 | -0.158816 |
| H | -1.003462 | -1.184898 | -0.485738 |
| C | -2.978228 | -1.677808 | 0.230347  |
| C | -3.855398 | -2.690679 | 0.635521  |
| H | -4.870012 | -2.429927 | 0.926659  |
| C | -3.407735 | -4.011797 | 0.649389  |
| H | -4.085807 | -4.804300 | 0.961230  |
| C | 3.738816  | 1.064639  | -0.124212 |
| C | 4.494713  | -1.395514 | 0.115549  |
| H | 3.977529  | -1.507948 | 1.080518  |
| H | 5.403089  | -2.015132 | 0.183400  |
| C | 3.051574  | 3.542411  | -0.381989 |
| H | 3.467412  | 4.561750  | -0.353330 |
| H | 2.704830  | 3.384499  | -1.415989 |
| C | 4.912833  | 0.076372  | -0.053260 |
| H | 5.528212  | 0.180535  | -0.961356 |
| C | 1.844957  | 3.462186  | 0.564283  |
| H | 2.183268  | 3.599780  | 1.604244  |
| H | 5.565297  | 0.353762  | 0.789628  |
| H | 1.408464  | 2.455437  | 0.516113  |

|   |           |          |           |
|---|-----------|----------|-----------|
| C | 0.755991  | 4.494505 | 0.245450  |
| H | 0.469927  | 4.410234 | -0.814260 |
| H | 1.162599  | 5.508961 | 0.374469  |
| H | 3.046423  | 0.855341 | 0.704994  |
| C | 4.175787  | 2.537191 | -0.074013 |
| H | 4.991752  | 2.694254 | -0.796922 |
| H | 4.603085  | 2.754741 | 0.917958  |
| C | -0.512665 | 4.362367 | 1.119159  |
| H | -1.165355 | 5.222975 | 0.913979  |
| H | 3.167366  | 0.893259 | -1.048941 |
| H | -0.228954 | 4.428044 | 2.178893  |

Sum of electronic and zero-point Energies= -1162.321758

Sum of electronic and thermal Energies= -1162.294186

Sum of electronic and thermal Enthalpies= -1162.293242

Sum of electronic and thermal Free Energies= -1162.381253

daec[n=7]-1-E2 (dmf)

|   |           |           |           |
|---|-----------|-----------|-----------|
| C | 0.597668  | 2.852271  | 0.932861  |
| H | 1.088754  | 2.776055  | 1.898692  |
| C | 1.332796  | 3.329733  | -0.165941 |
| C | 0.693142  | 3.439994  | -1.407310 |
| H | 1.239326  | 3.816177  | -2.270413 |
| C | -0.650963 | 3.079824  | -1.545861 |
| H | -1.161615 | 3.176757  | -2.501573 |
| C | -1.374256 | 2.613266  | -0.452515 |
| O | -2.735621 | 2.402038  | -0.587871 |
| C | -0.752350 | 2.496726  | 0.809767  |
| O | -1.536479 | 2.053682  | 1.826035  |
| C | -0.947274 | 1.909644  | 3.117332  |
| H | -0.588676 | 2.873210  | 3.504476  |
| H | -0.118028 | 1.189321  | 3.102341  |
| H | -1.743484 | 1.532913  | 3.765571  |
| C | -4.551042 | -1.338603 | -0.383895 |
| H | -5.054398 | -2.302956 | -0.339794 |
| C | -3.162761 | -1.291590 | -0.578108 |
| C | -2.364537 | -2.575436 | -0.696751 |
| H | -1.654371 | -2.494738 | -1.531139 |
| H | -3.050874 | -3.397067 | -0.945550 |
| C | -1.599692 | -2.935410 | 0.596522  |
| H | -0.788659 | -2.208763 | 0.749659  |
| C | -1.047461 | -4.372356 | 0.624736  |
| H | -1.898169 | -5.071283 | 0.605545  |
| H | -0.551735 | -4.531428 | 1.593540  |
| C | -0.086146 | -4.762478 | -0.514016 |
| H | -0.625895 | -4.727806 | -1.472020 |
| C | 1.191684  | -3.914537 | -0.641668 |
| H | 0.919261  | -2.875492 | -0.874548 |
| H | 1.759806  | -4.278249 | -1.512719 |
| H | 0.200468  | -5.816118 | -0.370263 |
| H | -2.279810 | -2.815181 | 1.452568  |
| C | -2.525623 | -0.039695 | -0.637254 |
| H | -1.451579 | 0.016955  | -0.800607 |
| C | -3.271017 | 1.134792  | -0.497033 |
| C | -4.658010 | 1.082498  | -0.308419 |
| H | -5.215094 | 2.011133  | -0.210025 |
| C | -5.290329 | -0.158232 | -0.253763 |
| H | -6.368278 | -0.204508 | -0.108570 |
| C | 3.387156  | -1.783925 | -0.010818 |
| C | 2.106040  | -3.944583 | 0.593448  |
| H | 1.596754  | -3.465794 | 1.443554  |
| H | 2.273595  | -4.992262 | 0.889871  |
| C | 4.722845  | 0.327465  | -0.661389 |
| H | 5.745039  | 0.737057  | -0.667826 |
| H | 4.426930  | 0.231802  | -1.718582 |
| C | 3.471860  | -3.265254 | 0.386457  |
| H | 4.039656  | -3.812864 | -0.382937 |
| C | 3.783507  | 1.327502  | 0.028223  |
| H | 4.070711  | 1.432099  | 1.087236  |
| H | 4.054392  | -3.356008 | 1.316789  |
| H | 2.759606  | 0.929974  | 0.027289  |

|   |          |           |           |
|---|----------|-----------|-----------|
| C | 3.783250 | 2.709252  | -0.637696 |
| H | 3.550387 | 2.598939  | -1.707842 |
| H | 4.793851 | 3.141847  | -0.585897 |
| H | 2.706233 | -1.267179 | 0.682152  |
| C | 4.749746 | -1.073509 | -0.024890 |
| H | 5.471645 | -1.693795 | -0.578985 |
| H | 5.135582 | -1.004885 | 1.004831  |
| C | 2.792399 | 3.714810  | -0.009261 |
| H | 2.955056 | 4.696701  | -0.476530 |
| H | 2.930853 | -1.695788 | -1.008259 |
| H | 3.025789 | 3.832459  | 1.058090  |

Sum of electronic and zero-point Energies= -1162.322468

Sum of electronic and thermal Energies= -1162.294920

Sum of electronic and thermal Enthalpies= -1162.293976

Sum of electronic and thermal Free Energies= -1162.381494

daec[n=7]-2-TS (dmf)

|   |           |           |           |
|---|-----------|-----------|-----------|
| C | -1.738115 | 3.298567  | -0.362483 |
| H | -2.388366 | 4.169101  | -0.341729 |
| C | -2.320670 | 2.015764  | -0.414045 |
| C | -1.465001 | 0.916088  | -0.438395 |
| H | -1.862609 | -0.090288 | -0.499162 |
| C | -0.073606 | 1.073423  | -0.382348 |
| H | 0.558196  | 0.192209  | -0.371832 |
| C | 0.494878  | 2.339617  | -0.329873 |
| O | 1.851536  | 2.598592  | -0.281175 |
| C | -0.351814 | 3.477464  | -0.331905 |
| O | 0.274050  | 4.684916  | -0.287116 |
| C | -0.536246 | 5.856342  | -0.280242 |
| H | 0.160648  | 6.699120  | -0.248877 |
| H | -1.188258 | 5.892179  | 0.603950  |
| H | -1.151336 | 5.927689  | -1.188323 |
| C | 4.643497  | -0.214664 | 1.015374  |
| H | 5.387207  | -0.927244 | 1.367193  |
| C | 3.964543  | -0.454780 | -0.191690 |
| C | 4.230049  | -1.709102 | -1.006525 |
| H | 5.264806  | -1.684242 | -1.380966 |
| H | 3.584609  | -1.700641 | -1.894052 |
| C | 4.044406  | -3.034761 | -0.230693 |
| H | 4.299526  | -3.861430 | -0.910979 |
| C | 2.647674  | -3.279965 | 0.367994  |
| H | 2.384998  | -2.443845 | 1.033847  |
| H | 2.703278  | -4.170960 | 1.012243  |
| C | 1.521494  | -3.483559 | -0.656286 |
| H | 1.772235  | -4.334959 | -1.309484 |
| C | 0.148599  | -3.721425 | -0.006005 |
| H | -0.074924 | -2.877932 | 0.664361  |
| H | 0.193516  | -4.616997 | 0.634622  |
| H | 1.452682  | -2.605042 | -1.315727 |
| H | 4.784259  | -3.073776 | 0.581492  |
| C | 3.028139  | 0.493305  | -0.630930 |
| H | 2.515326  | 0.348233  | -1.578903 |
| C | 2.743304  | 1.623891  | 0.143987  |
| C | 3.415484  | 1.851823  | 1.345984  |
| H | 3.185933  | 2.741595  | 1.927059  |
| C | 4.376415  | 0.929523  | 1.770185  |
| H | 4.913336  | 1.103387  | 2.700916  |
| C | -2.849286 | -2.824442 | 0.417319  |
| C | -0.983623 | -3.879328 | -1.031868 |
| H | -0.975859 | -3.004816 | -1.702628 |
| H | -0.770802 | -4.751535 | -1.669615 |
| C | -4.865664 | -1.496051 | 1.377860  |
| H | -5.959839 | -1.420963 | 1.276856  |
| H | -4.678327 | -1.787414 | 2.423160  |
| C | -2.399749 | -4.022809 | -0.442976 |
| H | -2.471776 | -4.951176 | 0.144806  |
| C | -4.243088 | -0.102191 | 1.156129  |
| H | -3.174433 | -0.138640 | 1.404045  |
| H | -3.101646 | -4.142601 | -1.282839 |
| H | -4.692885 | 0.592867  | 1.882299  |

|   |           |           |           |
|---|-----------|-----------|-----------|
| C | -4.431028 | 0.478137  | -0.255633 |
| H | -5.508234 | 0.536186  | -0.473139 |
| H | -4.013647 | -0.206230 | -1.007287 |
| H | -2.384740 | -1.914869 | 0.015080  |
| C | -4.372564 | -2.627384 | 0.452507  |
| H | -4.854412 | -3.565077 | 0.771367  |
| H | -4.724698 | -2.446401 | -0.574509 |
| C | -3.838818 | 1.886358  | -0.461988 |
| H | -4.188174 | 2.265907  | -1.435414 |
| H | -2.464786 | -2.929059 | 1.443086  |
| H | -4.270728 | 2.570559  | 0.284673  |

Sum of electronic and zero-point Energies= -1162.311898

Sum of electronic and thermal Energies= -1162.285340

Sum of electronic and thermal Enthalpies= -1162.284396

Sum of electronic and thermal Free Energies= -1162.368320

daec[n=7]-2-E1 (dmf)

|   |           |           |           |
|---|-----------|-----------|-----------|
| C | -2.101181 | 2.575945  | -0.493454 |
| H | -2.887559 | 2.907861  | -1.165570 |
| C | -2.462639 | 2.007547  | 0.743518  |
| C | -1.440901 | 1.590586  | 1.601677  |
| H | -1.684070 | 1.165431  | 2.573262  |
| C | -0.092915 | 1.725131  | 1.236653  |
| H | 0.689292  | 1.397534  | 1.916108  |
| C | 0.253577  | 2.291837  | 0.013607  |
| O | 1.548816  | 2.507804  | -0.408520 |
| C | -0.763809 | 2.728004  | -0.869432 |
| O | -0.341746 | 3.278126  | -2.040148 |
| C | -1.332104 | 3.729591  | -2.959470 |
| H | -0.781644 | 4.127087  | -3.817257 |
| H | -1.952734 | 4.526445  | -2.526034 |
| H | -1.979111 | 2.906144  | -3.293568 |
| C | 4.799943  | 0.423564  | 1.151869  |
| H | 5.675719  | -0.098223 | 1.534985  |
| C | 4.105855  | -0.106504 | 0.050222  |
| C | 4.561236  | -1.392324 | -0.613416 |
| H | 5.648894  | -1.347557 | -0.767321 |
| H | 4.109885  | -1.460713 | -1.611154 |
| C | 4.251044  | -2.679783 | 0.186824  |
| H | 4.673112  | -3.529841 | -0.370512 |
| C | 2.764169  | -2.945542 | 0.474078  |
| H | 2.363462  | -2.131150 | 1.096787  |
| H | 2.689173  | -3.857861 | 1.085898  |
| C | 1.875422  | -3.099568 | -0.769135 |
| H | 2.271084  | -3.900299 | -1.414351 |
| C | 0.407019  | -3.387195 | -0.420295 |
| H | 0.092003  | -2.682276 | 0.362668  |
| H | 0.319151  | -4.392928 | 0.021480  |
| H | 1.918758  | -2.177661 | -1.367168 |
| H | 4.793620  | -2.640104 | 1.142952  |
| C | 2.989616  | 0.593333  | -0.429566 |
| H | 2.436899  | 0.225581  | -1.291551 |
| C | 2.589808  | 1.791768  | 0.168322  |
| C | 3.286152  | 2.320244  | 1.255988  |
| H | 2.971256  | 3.263082  | 1.696661  |
| C | 4.394833  | 1.620990  | 1.746191  |
| H | 4.951629  | 2.023092  | 2.590548  |
| C | -2.583247 | -2.648068 | -0.171553 |
| C | -0.539509 | -3.259653 | -1.623170 |
| H | -0.438268 | -2.244008 | -2.038513 |
| H | -0.214597 | -3.947197 | -2.419767 |
| C | -4.675840 | -2.049320 | 1.214696  |
| H | -5.775021 | -2.014445 | 1.154161  |
| H | -4.439026 | -2.756019 | 2.025357  |
| C | -2.025478 | -3.516054 | -1.311709 |
| H | -2.177969 | -4.578561 | -1.064098 |
| C | -4.142961 | -0.663960 | 1.623153  |
| H | -3.048299 | -0.706458 | 1.701249  |
| H | -2.608080 | -3.331787 | -2.227973 |
| H | -4.506754 | -0.435891 | 2.637224  |

|   |           |           |           |
|---|-----------|-----------|-----------|
| C | -4.548539 | 0.490137  | 0.696107  |
| H | -5.644814 | 0.588132  | 0.709395  |
| H | -4.272244 | 0.266164  | -0.344504 |
| H | -2.207572 | -1.620094 | -0.285880 |
| C | -4.118097 | -2.623310 | -0.102657 |
| H | -4.505022 | -3.647765 | -0.219403 |
| H | -4.507562 | -2.056411 | -0.961826 |
| C | -3.931015 | 1.853957  | 1.095381  |
| H | -4.496550 | 2.651984  | 0.595296  |
| H | -2.185811 | -3.008825 | 0.788916  |
| H | -4.070421 | 2.001985  | 2.176277  |

Sum of electronic and zero-point Energies= -1162.317746

Sum of electronic and thermal Energies= -1162.290221

Sum of electronic and thermal Enthalpies= -1162.289276

Sum of electronic and thermal Free Energies= -1162.376532

daec[n=7]-2-E2 (dmf)

|   |           |           |           |
|---|-----------|-----------|-----------|
| C | -1.238235 | 2.543659  | 0.358772  |
| H | -1.811129 | 2.676410  | 1.271196  |
| C | -1.918588 | 2.493243  | -0.873090 |
| C | -1.167632 | 2.352147  | -2.046322 |
| H | -1.670778 | 2.316918  | -3.010879 |
| C | 0.231105  | 2.295738  | -1.996263 |
| H | 0.820948  | 2.234630  | -2.908339 |
| C | 0.896191  | 2.365119  | -0.777130 |
| O | 2.273479  | 2.506508  | -0.744162 |
| C | 0.158510  | 2.471170  | 0.424022  |
| O | 0.888519  | 2.531599  | 1.567466  |
| C | 0.190369  | 2.650233  | 2.805695  |
| H | 0.961912  | 2.660079  | 3.580836  |
| H | -0.481729 | 1.797077  | 2.971398  |
| H | -0.385544 | 3.584653  | 2.854007  |
| C | 4.971358  | -0.482434 | 0.314192  |
| H | 5.716718  | -1.237267 | 0.559791  |
| C | 3.831353  | -0.849074 | -0.420902 |
| C | 3.670305  | -2.282062 | -0.895975 |
| H | 4.615395  | -2.596968 | -1.361384 |
| H | 2.910566  | -2.323028 | -1.686642 |
| C | 3.328929  | -3.301431 | 0.216730  |
| H | 3.483252  | -4.313683 | -0.186796 |
| C | 1.901913  | -3.201358 | 0.780944  |
| H | 1.712448  | -2.171841 | 1.122530  |
| H | 1.832050  | -3.836764 | 1.677131  |
| C | 0.808261  | -3.616364 | -0.213952 |
| H | 0.982180  | -4.656293 | -0.534026 |
| C | -0.615790 | -3.476478 | 0.340879  |
| H | -0.730689 | -2.464628 | 0.755847  |
| H | -0.761104 | -4.171446 | 1.183639  |
| H | 0.886419  | -3.002929 | -1.123876 |
| H | 4.054354  | -3.184218 | 1.034826  |
| C | 2.886314  | 0.139611  | -0.740746 |
| H | 2.004044  | -0.116800 | -1.323647 |
| C | 3.096995  | 1.467912  | -0.350653 |
| C | 4.235923  | 1.826738  | 0.375376  |
| H | 4.376696  | 2.865850  | 0.662322  |
| C | 5.168543  | 0.842645  | 0.708538  |
| H | 6.058968  | 1.116105  | 1.272066  |
| C | -3.371437 | -2.068451 | 0.323684  |
| C | -1.693783 | -3.715617 | -0.726601 |
| H | -1.489298 | -3.050062 | -1.580849 |
| H | -1.603117 | -4.742571 | -1.113643 |
| C | -5.118615 | -0.335388 | 1.103341  |
| H | -6.167962 | -0.040626 | 0.946225  |
| H | -5.023967 | -0.560993 | 2.176998  |
| C | -3.140276 | -3.472494 | -0.262197 |
| H | -3.433089 | -4.231953 | 0.479703  |
| C | -4.203259 | 0.863015  | 0.789790  |
| H | -3.169736 | 0.611826  | 1.063505  |
| H | -3.807352 | -3.619861 | -1.125886 |
| H | -4.494015 | 1.697558  | 1.447011  |

|   |           |           |           |
|---|-----------|-----------|-----------|
| C | -4.246705 | 1.348451  | -0.665466 |
| H | -5.292271 | 1.555475  | -0.941217 |
| H | -3.900380 | 0.555943  | -1.344275 |
| H | -2.770427 | -1.342331 | -0.243767 |
| C | -4.840206 | -1.623231 | 0.304658  |
| H | -5.473543 | -2.426378 | 0.712858  |
| H | -5.157506 | -1.494034 | -0.741362 |
| C | -3.429703 | 2.635467  | -0.934047 |
| H | -3.698627 | 3.009180  | -1.931161 |
| H | -2.991847 | -2.031904 | 1.355754  |
| H | -3.748874 | 3.405412  | -0.215987 |

Sum of electronic and zero-point Energies= -1162.317737

Sum of electronic and thermal Energies= -1162.290211

Sum of electronic and thermal Enthalpies= -1162.289267

Sum of electronic and thermal Free Energies= -1162.376856

daec[n=7]-3-TS (dmf)

|   |           |           |           |
|---|-----------|-----------|-----------|
| C | -1.694359 | -3.566459 | 0.228496  |
| H | -2.035631 | -4.582427 | 0.421802  |
| C | -0.325957 | -3.252926 | 0.286120  |
| C | 0.031743  | -1.927663 | 0.012012  |
| H | 1.071173  | -1.621510 | 0.007534  |
| C | -0.925162 | -0.952464 | -0.272380 |
| H | -0.592152 | 0.061032  | -0.456357 |
| C | -2.282357 | -1.271779 | -0.306460 |
| O | -3.290386 | -0.364657 | -0.594680 |
| C | -2.669178 | -2.605911 | -0.060942 |
| O | -3.991448 | -2.977220 | -0.034374 |
| C | -4.639445 | -3.017695 | -1.311642 |
| H | -5.663232 | -3.358520 | -1.125097 |
| H | -4.137621 | -3.730240 | -1.982737 |
| H | -4.666261 | -2.027807 | -1.783087 |
| C | -3.086138 | 3.542540  | 0.865173  |
| H | -3.035483 | 4.551357  | 1.271915  |
| C | -2.167176 | 3.144938  | -0.118892 |
| C | -1.012847 | 4.038280  | -0.525391 |
| H | -1.359781 | 5.067954  | -0.693318 |
| H | -0.590015 | 3.681970  | -1.474120 |
| C | 0.082315  | 4.053018  | 0.568767  |
| H | -0.338557 | 4.533782  | 1.463360  |
| C | 1.380135  | 4.778023  | 0.166196  |
| H | 1.911219  | 5.080710  | 1.081614  |
| H | 1.120595  | 5.712743  | -0.354615 |
| C | 2.359256  | 3.968435  | -0.706570 |
| H | 3.153505  | 4.651834  | -1.045210 |
| C | 3.018426  | 2.772817  | 0.007416  |
| H | 2.276139  | 1.979927  | 0.178176  |
| H | 3.358554  | 3.093747  | 1.005456  |
| H | 1.855167  | 3.618422  | -1.620918 |
| H | 0.309670  | 3.018592  | 0.862837  |
| C | -2.267144 | 1.848687  | -0.645374 |
| H | -1.605054 | 1.547123  | -1.452095 |
| C | -3.196359 | 0.942188  | -0.125542 |
| C | -4.105139 | 1.339501  | 0.857708  |
| H | -4.829980 | 0.623209  | 1.236465  |
| C | -4.056439 | 2.652587  | 1.334521  |
| H | -4.767321 | 2.974804  | 2.093118  |
| C | 4.191515  | -0.328871 | -0.218441 |
| C | 4.224074  | 2.208524  | -0.763121 |
| H | 3.910914  | 1.921036  | -1.779946 |
| H | 4.955274  | 3.021379  | -0.892769 |
| C | 4.351522  | -2.893521 | 0.033115  |
| H | 4.143523  | -2.925304 | -1.047956 |
| H | 5.090408  | -3.687199 | 0.217894  |
| C | 4.933750  | 1.012137  | -0.097791 |
| H | 5.119851  | 1.241425  | 0.963837  |
| C | 3.054744  | -3.210804 | 0.808933  |
| H | 2.540608  | -2.274852 | 1.052986  |
| H | 5.926465  | 0.896635  | -0.559887 |
| H | 3.304265  | -3.665720 | 1.779626  |

|   |          |           |           |
|---|----------|-----------|-----------|
| C | 2.106638 | -4.149905 | 0.037092  |
| H | 2.581331 | -5.139635 | -0.033291 |
| H | 2.006215 | -3.791646 | -0.998266 |
| H | 3.208947 | -0.257731 | 0.270126  |
| C | 4.979247 | -1.522527 | 0.353540  |
| H | 5.997664 | -1.498291 | -0.064266 |
| H | 5.094778 | -1.406586 | 1.443084  |
| C | 0.694763 | -4.327741 | 0.639626  |
| H | 0.778897 | -4.398605 | 1.736690  |
| H | 3.989766 | -0.520908 | -1.284831 |
| H | 0.288263 | -5.296135 | 0.317652  |

Sum of electronic and zero-point Energies= -1162.303757

Sum of electronic and thermal Energies= -1162.276648

Sum of electronic and thermal Enthalpies= -1162.275704

Sum of electronic and thermal Free Energies= -1162.361852

daec[n=7]-3-E1 (dmf)

|   |           |           |           |
|---|-----------|-----------|-----------|
| C | 0.249444  | -3.696994 | -0.208744 |
| H | 0.708819  | -4.432408 | -0.867278 |
| C | 0.918361  | -3.254859 | 0.942915  |
| C | 0.268954  | -2.316613 | 1.757912  |
| H | 0.755676  | -1.962128 | 2.664885  |
| C | -1.004093 | -1.837238 | 1.437406  |
| H | -1.502396 | -1.123528 | 2.089089  |
| C | -1.651783 | -2.281042 | 0.282241  |
| O | -2.946688 | -1.918778 | -0.033326 |
| C | -1.019987 | -3.225023 | -0.550580 |
| O | -1.648574 | -3.747044 | -1.654116 |
| C | -1.792065 | -2.846349 | -2.759183 |
| H | -2.271296 | -3.419027 | -3.559860 |
| H | -0.810047 | -2.491787 | -3.104629 |
| H | -2.421950 | -1.985117 | -2.504870 |
| C | -4.379408 | 1.981353  | 0.269367  |
| H | -4.781774 | 2.991223  | 0.331265  |
| C | -3.045049 | 1.791421  | -0.125347 |
| C | -2.152144 | 2.977492  | -0.428920 |
| H | -2.755620 | 3.783402  | -0.870870 |
| H | -1.405769 | 2.689791  | -1.180831 |
| C | -1.440417 | 3.522321  | 0.828820  |
| H | -2.199833 | 3.728544  | 1.597366  |
| C | -0.632013 | 4.809787  | 0.587421  |
| H | -0.259432 | 5.169795  | 1.559087  |
| H | -1.317317 | 5.588427  | 0.217739  |
| C | 0.557028  | 4.699644  | -0.384696 |
| H | 0.982507  | 5.706650  | -0.517320 |
| C | 1.673889  | 3.748320  | 0.070758  |
| H | 1.280880  | 2.724468  | 0.140095  |
| H | 1.991445  | 4.023816  | 1.089834  |
| H | 0.201809  | 4.392714  | -1.380272 |
| H | -0.793656 | 2.736582  | 1.245093  |
| C | -2.544178 | 0.483723  | -0.208494 |
| H | -1.517196 | 0.315944  | -0.525242 |
| C | -3.363344 | -0.606268 | 0.107106  |
| C | -4.691117 | -0.414163 | 0.498729  |
| H | -5.309950 | -1.277571 | 0.730275  |
| C | -5.193047 | 0.887016  | 0.574161  |
| H | -6.227503 | 1.044957  | 0.873761  |
| C | 3.756573  | 1.353419  | -0.536645 |
| C | 2.897305  | 3.773750  | -0.859206 |
| H | 2.584324  | 3.505095  | -1.881221 |
| H | 3.269719  | 4.808281  | -0.919177 |
| C | 4.710874  | -1.042016 | -0.311067 |
| H | 4.465638  | -1.243420 | -1.366384 |
| H | 5.655127  | -1.572640 | -0.112522 |
| C | 4.055996  | 2.856312  | -0.428604 |
| H | 4.343403  | 3.097984  | 0.607536  |
| C | 3.611035  | -1.632763 | 0.583815  |
| H | 2.657868  | -1.124776 | 0.383729  |
| H | 4.936813  | 3.085586  | -1.048447 |
| H | 3.851762  | -1.426790 | 1.639524  |



|   |          |           |           |
|---|----------|-----------|-----------|
| C | 3.425075 | -3.143654 | 0.393047  |
| H | 4.369153 | -3.660069 | 0.623858  |
| H | 3.209072 | -3.355593 | -0.665391 |
| H | 2.883731 | 1.106386  | 0.082630  |
| C | 4.944292 | 0.468379  | -0.127802 |
| H | 5.825529 | 0.762220  | -0.719238 |
| H | 5.203451 | 0.670906  | 0.923964  |
| C | 2.309826 | -3.761603 | 1.267657  |
| H | 2.530817 | -3.561871 | 2.325533  |
| H | 3.471838 | 1.117739  | -1.575302 |
| H | 2.336407 | -4.853314 | 1.140719  |

Sum of electronic and zero-point Energies= -1162.320629

Sum of electronic and thermal Energies= -1162.292688

Sum of electronic and thermal Enthalpies= -1162.291744

Sum of electronic and thermal Free Energies= -1162.380708

daec[n=7]-3-E2 (dmf)

|   |           |           |           |
|---|-----------|-----------|-----------|
| C | -0.003671 | -2.837424 | 1.031775  |
| H | 0.397140  | -2.802612 | 2.043290  |
| C | 0.712469  | -3.470801 | 0.005809  |
| C | 0.143267  | -3.496170 | -1.277626 |
| H | 0.669331  | -3.989649 | -2.093075 |
| C | -1.094590 | -2.900387 | -1.526273 |
| H | -1.538513 | -2.924154 | -2.519093 |
| C | -1.796422 | -2.277027 | -0.493123 |
| O | -3.070258 | -1.800177 | -0.747629 |
| C | -1.251034 | -2.247992 | 0.802501  |
| O | -1.904897 | -1.620124 | 1.834566  |
| C | -2.995465 | -2.367820 | 2.391397  |
| H | -3.422444 | -1.744722 | 3.183615  |
| H | -2.638722 | -3.313842 | 2.823569  |
| H | -3.765996 | -2.579682 | 1.639229  |
| C | -4.127727 | 2.224708  | -0.575108 |
| H | -4.432968 | 3.269409  | -0.545076 |
| C | -2.763460 | 1.904278  | -0.651768 |
| C | -1.719241 | 3.002860  | -0.649694 |
| H | -2.141215 | 3.900787  | -1.123670 |
| H | -0.859052 | 2.696271  | -1.259302 |
| C | -1.243295 | 3.368846  | 0.773753  |
| H | -2.127540 | 3.527685  | 1.408327  |
| C | -0.370183 | 4.634901  | 0.841561  |
| H | -0.134096 | 4.833979  | 1.898583  |
| H | -0.971786 | 5.491071  | 0.498512  |
| C | 0.942104  | 4.607833  | 0.037931  |
| H | 1.420061  | 5.595426  | 0.132941  |
| C | 1.944196  | 3.529054  | 0.473799  |
| H | 1.506847  | 2.534110  | 0.311350  |
| H | 2.121118  | 3.612148  | 1.558678  |
| H | 0.721981  | 4.484871  | -1.033531 |
| H | -0.710136 | 2.510102  | 1.206545  |
| C | -2.382768 | 0.553282  | -0.697814 |
| H | -1.330115 | 0.288791  | -0.768251 |
| C | -3.354770 | -0.451137 | -0.657166 |
| C | -4.714479 | -0.128259 | -0.582839 |
| H | -5.451145 | -0.927855 | -0.563635 |
| C | -5.092641 | 1.213833  | -0.543245 |
| H | -6.149093 | 1.470788  | -0.489243 |
| C | 3.961315  | 1.139103  | -0.322626 |
| C | 3.288515  | 3.634100  | -0.263499 |
| H | 3.111828  | 3.587286  | -1.350374 |
| H | 3.717325  | 4.629595  | -0.069611 |
| C | 4.737912  | -1.321477 | -0.481848 |
| H | 4.599245  | -1.288284 | -1.574587 |
| H | 5.622286  | -1.953926 | -0.307443 |
| C | 4.324140  | 2.563447  | 0.123338  |
| H | 4.473430  | 2.578791  | 1.215137  |
| C | 3.515652  | -1.993080 | 0.162123  |
| H | 2.620706  | -1.377445 | -0.002845 |
| H | 5.295228  | 2.835054  | -0.319248 |
| H | 3.659873  | -2.037970 | 1.253874  |

|   |          |           |           |
|---|----------|-----------|-----------|
| C | 3.259149 | -3.407201 | -0.374021 |
| H | 4.153847 | -4.027033 | -0.211160 |
| H | 3.109879 | -3.364286 | -1.463669 |
| H | 3.003061 | 0.845521  | 0.126729  |
| C | 5.035169 | 0.098992  | 0.030231  |
| H | 5.999119 | 0.429248  | -0.387436 |
| H | 5.171584 | 0.071098  | 1.123400  |
| C | 2.054951 | -4.124321 | 0.274744  |
| H | 2.215098 | -4.187403 | 1.359889  |
| H | 3.801783 | 1.134996  | -1.413485 |
| H | 2.028743 | -5.158605 | -0.098310 |

Sum of electronic and zero-point Energies= -1162.321399

Sum of electronic and thermal Energies= -1162.293411

Sum of electronic and thermal Enthalpies= -1162.292467

Sum of electronic and thermal Free Energies= -1162.381672

daec[n=7]-4-TS (dmf)

|   |           |           |           |
|---|-----------|-----------|-----------|
| C | 0.325295  | 3.482157  | 0.277878  |
| H | 0.510865  | 4.440480  | 0.755585  |
| C | 1.390660  | 2.568245  | 0.158409  |
| C | 1.135025  | 1.335729  | -0.447238 |
| H | 1.921564  | 0.599969  | -0.561461 |
| C | -0.142150 | 1.023286  | -0.924970 |
| H | -0.317856 | 0.067401  | -1.409640 |
| C | -1.193012 | 1.920830  | -0.788768 |
| O | -2.464168 | 1.633890  | -1.273711 |
| C | -0.963308 | 3.175508  | -0.178894 |
| O | -2.039928 | 3.999595  | -0.072458 |
| C | -1.849802 | 5.273246  | 0.539339  |
| H | -2.827859 | 5.762452  | 0.515657  |
| H | -1.125072 | 5.883399  | -0.017441 |
| H | -1.518022 | 5.174479  | 1.582356  |
| C | -4.619876 | -1.361884 | 0.681521  |
| H | -5.191301 | -2.134262 | 1.194128  |
| C | -3.680333 | -1.728035 | -0.297469 |
| C | -3.406999 | -3.186161 | -0.615142 |
| H | -2.789206 | -3.250025 | -1.520329 |
| H | -4.354788 | -3.693783 | -0.846658 |
| C | -2.727299 | -3.955147 | 0.543589  |
| H | -3.390337 | -3.911972 | 1.419817  |
| C | -1.331372 | -3.454049 | 0.956114  |
| H | -1.080426 | -3.902861 | 1.929365  |
| H | -1.367496 | -2.367514 | 1.127737  |
| C | -0.194888 | -3.778741 | -0.027281 |
| H | -0.134564 | -4.871571 | -0.155678 |
| C | 1.165262  | -3.244287 | 0.450079  |
| H | 1.327965  | -3.562285 | 1.492568  |
| H | 1.128898  | -2.144388 | 0.472717  |
| H | -0.419634 | -3.366445 | -1.022778 |
| H | -2.664288 | -5.017139 | 0.261473  |
| C | -2.974311 | -0.711089 | -0.955303 |
| H | -2.269121 | -0.964767 | -1.742646 |
| C | -3.168155 | 0.630419  | -0.610744 |
| C | -4.098570 | 0.988874  | 0.365713  |
| H | -4.235118 | 2.038254  | 0.613342  |
| C | -4.830446 | -0.018580 | 1.003019  |
| H | -5.565297 | 0.248621  | 1.760379  |
| C | 3.972651  | -1.686723 | -0.390090 |
| C | 2.363263  | -3.714304 | -0.391480 |
| H | 2.199622  | -3.460843 | -1.451353 |
| H | 2.409129  | -4.813128 | -0.346389 |
| C | 5.608526  | 0.333963  | -0.240726 |
| H | 6.411427  | 0.728893  | 0.401531  |
| H | 6.071688  | 0.145724  | -1.221858 |
| C | 3.713258  | -3.130975 | 0.074259  |
| H | 4.534341  | -3.768797 | -0.286327 |
| C | 4.534461  | 1.423894  | -0.425630 |
| H | 3.814070  | 1.096830  | -1.186299 |
| H | 3.757748  | -3.176210 | 1.174428  |
| H | 5.022335  | 2.316168  | -0.848029 |

|   |          |           |           |
|---|----------|-----------|-----------|
| C | 3.805722 | 1.837842  | 0.864834  |
| H | 4.560946 | 2.187282  | 1.584705  |
| H | 3.326201 | 0.966369  | 1.332329  |
| H | 3.061288 | -1.091675 | -0.246074 |
| C | 5.139221 | -1.011773 | 0.348542  |
| H | 6.003295 | -1.694875 | 0.355408  |
| H | 4.857617 | -0.879022 | 1.404111  |
| C | 2.761358 | 2.961664  | 0.697570  |
| H | 2.606614 | 3.444335  | 1.673379  |
| H | 4.167314 | -1.689605 | -1.474586 |
| H | 3.185139 | 3.749171  | 0.053100  |

Sum of electronic and zero-point Energies= -1162.310875

Sum of electronic and thermal Energies= -1162.284254

Sum of electronic and thermal Enthalpies= -1162.283310

Sum of electronic and thermal Free Energies= -1162.367361

daec[n=7]-4-E1 (dmf)

|   |           |           |           |
|---|-----------|-----------|-----------|
| C | 0.897054  | 2.154831  | 1.086843  |
| H | 1.338052  | 1.842045  | 2.029313  |
| C | 1.721782  | 2.756294  | 1.16835   |
| C | 1.145007  | 3.170498  | -1.188081 |
| H | 1.760966  | 3.639545  | -1.852818 |
| C | -0.229893 | 3.018902  | -1.306578 |
| H | -0.691977 | 3.371157  | -2.226251 |
| C | -1.045702 | 2.458854  | -0.329725 |
| O | -2.416036 | 2.529887  | -0.502775 |
| C | -0.479935 | 2.005389  | 0.885645  |
| O | -1.346267 | 1.484430  | 1.792765  |
| C | -0.819713 | 0.996505  | 3.025769  |
| H | -1.677206 | 0.601538  | 3.577743  |
| H | -0.351525 | 1.801815  | 3.608312  |
| H | -0.090223 | 0.192140  | 2.860131  |
| C | -5.045732 | -0.692656 | -0.588955 |
| H | -5.759961 | -1.513785 | -0.625136 |
| C | -3.690718 | -0.943363 | -0.861521 |
| C | -3.243555 | -2.358117 | -1.176014 |
| H | -2.331118 | -2.335708 | -1.786532 |
| H | -4.017961 | -2.839005 | -1.789155 |
| C | -3.008080 | -3.229656 | 0.084322  |
| H | -3.847730 | -3.075218 | 0.776789  |
| C | -1.675137 | -2.958913 | 0.804832  |
| H | -1.729712 | -3.351932 | 1.831128  |
| H | -1.525048 | -1.872737 | 0.905128  |
| C | -0.467730 | -3.590419 | 0.094291  |
| H | -0.544268 | -4.686935 | 0.171241  |
| C | 0.890522  | -3.127915 | 0.636068  |
| H | 0.929695  | -3.276656 | 1.727090  |
| H | 0.979668  | -2.043234 | 0.474297  |
| H | -0.507119 | -3.361235 | -0.981636 |
| H | -3.044450 | -4.289278 | -0.210325 |
| C | -2.780930 | 0.126229  | -0.823846 |
| H | -1.730423 | -0.041515 | -1.051213 |
| C | -3.225847 | 1.414507  | -0.506139 |
| C | -4.577189 | 1.658687  | -0.239202 |
| H | -4.896832 | 2.671211  | -0.004700 |
| C | -5.482621 | 0.598339  | -0.283666 |
| H | -6.536010 | 0.783886  | -0.080926 |
| C | 3.684031  | -1.920681 | -0.536495 |
| C | 2.077385  | -3.858185 | -0.014762 |
| H | 1.921640  | -3.906748 | -1.104663 |
| H | 2.084247  | -4.901402 | 0.335760  |
| C | 5.316049  | 0.002179  | -1.085809 |
| H | 6.301500  | 0.402486  | -0.800327 |
| H | 5.411677  | -0.321288 | -2.134117 |
| C | 3.447920  | -3.213227 | 0.259591  |
| H | 4.243969  | -3.932063 | 0.011750  |
| C | 4.282218  | 1.142298  | -1.020372 |
| H | 3.313778  | 0.794523  | -1.407192 |
| H | 3.547962  | -3.008195 | 1.337806  |
| H | 4.608883  | 1.941058  | -1.704492 |

|   |          |           |           |
|---|----------|-----------|-----------|
| C | 4.093968 | 1.741577  | 0.379673  |
| H | 5.078552 | 2.024327  | 0.783086  |
| H | 3.686958 | 0.986058  | 1.066830  |
| H | 2.857678 | -1.220387 | -0.351794 |
| C | 5.015942 | -1.231198 | -0.213778 |
| H | 5.836636 | -1.954055 | -0.343256 |
| H | 5.029759 | -0.949790 | 0.850096  |
| C | 3.191234 | 2.994040  | 0.414890  |
| H | 3.274552 | 3.446298  | 1.413889  |
| H | 3.648234 | -2.155200 | -1.612957 |
| H | 3.583594 | 3.734944  | -0.295726 |

Sum of electronic and zero-point Energies= -1162.320904

Sum of electronic and thermal Energies= -1162.293367

Sum of electronic and thermal Enthalpies= -1162.292423

Sum of electronic and thermal Free Energies= -1162.380357

daec[n=7]-4-E2 (dmf)

|   |           |           |           |
|---|-----------|-----------|-----------|
| C | 1.660974  | 2.859207  | 0.041335  |
| H | 2.472191  | 3.410325  | -0.425358 |
| C | 1.939912  | 2.065003  | 1.168748  |
| C | 0.884740  | 1.367390  | 1.765147  |
| H | 1.066218  | 0.755568  | 2.647365  |
| C | -0.417837 | 1.460086  | 1.256828  |
| H | -1.231860 | 0.930180  | 1.744132  |
| C | -0.683906 | 2.246863  | 0.138239  |
| O | -1.941047 | 2.442083  | -0.392816 |
| C | 0.368337  | 2.958595  | -0.484180 |
| O | 0.023982  | 3.708533  | -1.565925 |
| C | 1.053263  | 4.443809  | -2.221546 |
| H | 0.564662  | 4.962505  | -3.051558 |
| H | 1.834352  | 3.779910  | -2.618126 |
| H | 1.511338  | 5.184054  | -1.550654 |
| C | -5.129123 | -0.118880 | 0.386916  |
| H | -5.984300 | -0.768575 | 0.567129  |
| C | -4.042128 | -0.601460 | -0.363685 |
| C | -4.051509 | -2.020280 | -0.898273 |
| H | -3.355898 | -2.099326 | -1.743705 |
| H | -5.052180 | -2.243187 | -1.294244 |
| C | -3.708219 | -3.090320 | 0.166778  |
| H | -4.391196 | -2.961495 | 1.019094  |
| C | -2.255526 | -3.069074 | 0.672258  |
| H | -2.190619 | -3.685005 | 1.582069  |
| H | -1.989488 | -2.046713 | 0.981307  |
| C | -1.221737 | -3.583207 | -0.341554 |
| H | -1.432534 | -4.641975 | -0.562642 |
| C | 0.226040  | -3.437849 | 0.147078  |
| H | 0.328470  | -3.911744 | 1.136693  |
| H | 0.441580  | -2.369461 | 0.298746  |
| H | -1.328348 | -3.046955 | -1.296585 |
| H | -3.929232 | -4.081764 | -0.256855 |
| C | -2.958016 | 0.256373  | -0.596311 |
| H | -2.109450 | -0.078107 | -1.189860 |
| C | -2.964927 | 1.559118  | -0.084932 |
| C | -4.045029 | 2.034053  | 0.659095  |
| H | -4.031654 | 3.053820  | 1.035882  |
| C | -5.131517 | 1.183439  | 0.889276  |
| H | -5.984479 | 1.544406  | 1.460947  |
| C | 3.215622  | -2.372649 | -0.664071 |
| C | 1.261375  | -4.053977 | -0.806829 |
| H | 1.101342  | -3.665230 | -1.825560 |
| H | 1.081701  | -5.138462 | -0.864918 |
| C | 5.217286  | -0.737946 | -0.504542 |
| H | 6.212939  | -0.643947 | -0.043278 |
| H | 5.385680  | -0.733704 | -1.592844 |
| C | 2.723755  | -3.803646 | -0.394366 |
| H | 3.378453  | -4.507093 | -0.931293 |
| C | 4.379336  | 0.502283  | -0.141905 |
| H | 3.427839  | 0.478241  | -0.691265 |
| H | 2.841449  | -4.037611 | 0.676203  |
| H | 4.912153  | 1.395521  | -0.504249 |

|   |          |           |           |
|---|----------|-----------|-----------|
| C | 4.100717 | 0.668834  | 1.357889  |
| H | 5.055298 | 0.660402  | 1.906658  |
| H | 3.522977 | -0.188069 | 1.732821  |
| H | 2.505600 | -1.651068 | -0.236397 |
| C | 4.618562 | -2.099267 | -0.103304 |
| H | 5.304040 | -2.889967 | -0.446698 |
| H | 4.588489 | -2.185770 | 0.993450  |
| C | 3.350954 | 1.971493  | 1.719957  |
| H | 3.312110 | 2.050583  | 2.815958  |
| H | 3.213070 | -2.194026 | -1.751732 |
| H | 3.937409 | 2.830863  | 1.365030  |

Sum of electronic and zero-point Energies= -1162.321020

Sum of electronic and thermal Energies= -1162.293524

Sum of electronic and thermal Enthalpies= -1162.292580

Sum of electronic and thermal Free Energies= -1162.379858

daec[n=8]-1-TS (dmf)

|   |           |           |           |
|---|-----------|-----------|-----------|
| C | -4.019484 | 1.220907  | 0.057233  |
| H | -4.946449 | 1.721341  | 0.324400  |
| C | -2.887662 | 2.005756  | -0.243633 |
| C | -1.711702 | 1.340488  | -0.589792 |
| H | -0.815881 | 1.889754  | -0.858063 |
| C | -1.648925 | -0.058970 | -0.610922 |
| H | -0.708002 | -0.532488 | -0.861469 |
| C | -2.765808 | -0.828961 | -0.310247 |
| O | -2.810589 | -2.212775 | -0.335381 |
| C | -3.980540 | -0.176716 | 0.021471  |
| O | -5.038220 | -0.987833 | 0.293363  |
| C | -6.279996 | -0.375527 | 0.628732  |
| H | -6.652536 | 0.257078  | -0.189236 |
| H | -6.200671 | 0.225418  | 1.545670  |
| H | -6.980898 | -1.198571 | 0.796526  |
| C | 0.484379  | -4.573251 | 0.666644  |
| H | 1.335902  | -5.188625 | 0.952704  |
| C | 0.572305  | -3.747348 | -0.465106 |
| C | 1.871614  | -3.585059 | -1.227871 |
| H | 1.670641  | -3.068001 | -2.176225 |
| H | 2.301394  | -4.564279 | -1.483304 |
| C | 2.907717  | -2.775035 | -0.410975 |
| H | 2.394778  | -1.935182 | 0.077840  |
| C | 4.071564  | -2.237403 | -1.257061 |
| H | 3.694223  | -1.438537 | -1.913225 |
| H | 4.432558  | -3.032338 | -1.928013 |
| C | 5.271920  | -1.729954 | -0.433937 |
| H | 6.026041  | -1.324226 | -1.126385 |
| C | 4.976450  | -0.683371 | 0.656802  |
| H | 5.906709  | -0.517571 | 1.222488  |
| H | 4.260349  | -1.099514 | 1.381515  |
| H | 5.744693  | -2.597437 | 0.052629  |
| H | 3.294205  | -3.409897 | 0.400544  |
| C | -0.545779 | -2.981134 | -0.827002 |
| H | -0.511990 | -2.386918 | -1.735656 |
| C | -1.690658 | -2.969097 | -0.022825 |
| C | -1.770602 | -3.788755 | 1.106335  |
| H | -2.675382 | -3.778578 | 1.709054  |
| C | -0.683346 | -4.603405 | 1.434355  |
| H | -0.742874 | -5.251631 | 2.306754  |
| C | 2.461507  | 3.233059  | 0.355182  |
| C | 4.459843  | 0.680513  | 0.169733  |
| H | 5.166378  | 1.098122  | -0.566096 |
| H | 3.503851  | 0.554094  | -0.358704 |
| C | 0.689877  | 4.866967  | -0.586956 |
| H | 0.552042  | 5.929056  | -0.842389 |
| H | 0.766847  | 4.334290  | -1.548505 |
| C | 4.291363  | 1.672327  | 1.334160  |
| H | 5.245931  | 1.727356  | 1.880734  |
| H | 3.558828  | 1.264423  | 2.049404  |
| C | -0.557573 | 4.365685  | 1.608005  |
| H | -0.752854 | 5.012684  | 1.030265  |
| H | -0.362453 | 3.368054  | 0.571564  |

|   |           |          |           |
|---|-----------|----------|-----------|
| C | -1.810059 | 4.326116 | -0.737067 |
| H | -1.540801 | 3.918913 | -1.723202 |
| H | -2.144385 | 5.357180 | -0.922456 |
| C | 2.020303  | 4.695608 | 0.168605  |
| H | 2.806318  | 5.231443 | -0.386155 |
| H | 1.956509  | 5.186039 | 1.153221  |
| C | -3.000255 | 3.525118 | -0.177361 |
| H | 1.749370  | 2.707791 | 1.009355  |
| C | 3.872121  | 3.102705 | 0.950618  |
| H | 3.930445  | 3.730112 | 1.854015  |
| H | 4.605734  | 3.522701 | 0.243731  |
| H | -3.177326 | 3.822717 | 0.869087  |
| H | -3.911161 | 3.822244 | -0.717711 |
| H | 2.418950  | 2.720252 | -0.618092 |

Sum of electronic and zero-point Energies= -1201.594547

Sum of electronic and thermal Energies= -1201.566443

Sum of electronic and thermal Enthalpies= -1201.565499

Sum of electronic and thermal Free Energies= -1201.653467

daec[n=8]-1-E1 (dmf)

|   |           |           |           |
|---|-----------|-----------|-----------|
| C | -2.251174 | 2.758584  | -0.479172 |
| H | -2.389958 | 3.261480  | -1.432226 |
| C | -1.419855 | 3.352543  | 0.488772  |
| C | -1.259166 | 2.712736  | 1.722668  |
| H | -0.629564 | 3.160159  | 2.489094  |
| C | -1.907069 | 1.498787  | 1.981872  |
| H | -1.793886 | 0.996742  | 2.940341  |
| C | -2.724928 | 0.917444  | 1.020565  |
| O | -3.444374 | -0.221094 | 1.343885  |
| C | -2.912878 | 1.550948  | -0.228918 |
| O | -3.747985 | 0.924285  | -1.096850 |
| C | -3.952909 | 1.517027  | -2.378442 |
| H | -3.012350 | 1.591630  | -2.941246 |
| H | -4.407582 | 2.513367  | -2.291592 |
| H | -4.640149 | 0.850079  | -2.906548 |
| C | -2.576968 | -3.991696 | -0.202258 |
| H | -2.376262 | -4.986981 | -0.595545 |
| C | -1.677615 | -2.947878 | -0.464251 |
| C | -0.409873 | -3.198078 | -1.256056 |
| H | -0.164487 | -2.305421 | -1.849059 |
| H | -0.582594 | -4.015358 | -1.970486 |
| C | 0.804310  | -3.554911 | -0.372258 |
| H | 0.974272  | -2.737121 | 0.342405  |
| C | 2.072654  | -3.812598 | -1.198234 |
| H | 2.293433  | -2.921979 | -1.805305 |
| H | 1.867839  | -4.621023 | -1.917081 |
| C | 3.314428  | -4.202363 | -0.374439 |
| H | 4.136741  | -4.422103 | -1.073195 |
| C | 3.800867  | -3.159746 | 0.649810  |
| H | 4.678894  | -3.572228 | 1.171054  |
| H | 3.033908  | -3.014537 | 1.425696  |
| H | 3.107644  | -5.144865 | 0.156235  |
| H | 0.565999  | -4.446019 | 0.228785  |
| C | -1.952921 | -1.667276 | 0.043281  |
| H | -1.262724 | -0.849975 | -0.151896 |
| C | -3.111087 | -1.439474 | 0.792414  |
| C | -4.006052 | -2.484928 | 1.053449  |
| H | -4.901515 | -2.284452 | 1.636954  |
| C | -3.730389 | -3.757285 | 0.553818  |
| H | -4.426244 | -4.571077 | 0.750632  |
| C | 3.799316  | 1.368317  | 0.042965  |
| C | 4.168947  | -1.794808 | 0.049852  |
| H | 4.917121  | -1.933249 | -0.747956 |
| H | 3.283755  | -1.361659 | -0.434937 |
| C | 2.913914  | 3.570207  | -0.979314 |
| H | 3.252387  | 4.567438  | -1.301225 |
| H | 2.609172  | 3.041788  | -1.897073 |
| C | 4.715631  | -0.806784 | 1.091702  |
| H | 5.628505  | -1.229434 | 1.539565  |
| H | 3.989057  | -0.713321 | 1.915149  |

|                                                           |           |          |           |
|-----------------------------------------------------------|-----------|----------|-----------|
| C                                                         | 1.691978  | 3.729417 | -0.062194 |
| H                                                         | 1.995329  | 4.248264 | 0.861778  |
| H                                                         | 1.331094  | 2.739612 | 0.248283  |
| C                                                         | 0.540027  | 4.500788 | -0.719328 |
| H                                                         | 0.251206  | 4.001579 | -1.657031 |
| H                                                         | 0.888035  | 5.506303 | -1.000396 |
| C                                                         | 4.100732  | 2.824658 | -0.342402 |
| H                                                         | 4.944399  | 2.839418 | -1.050090 |
| H                                                         | 4.442317  | 3.374429 | 0.549373  |
| C                                                         | -0.711526 | 4.656728 | 0.175397  |
| H                                                         | 3.025563  | 1.343749 | 0.824858  |
| C                                                         | 5.030189  | 0.597908 | 0.545899  |
| H                                                         | 5.513654  | 1.183138 | 1.343781  |
| H                                                         | 5.771325  | 0.520750 | -0.265903 |
| H                                                         | -0.420652 | 5.146017 | 1.115455  |
| H                                                         | -1.414113 | 5.335253 | -0.328984 |
| H                                                         | 3.367803  | 0.854496 | -0.829139 |
| Sum of electronic and zero-point Energies= -1201.609837   |           |          |           |
| Sum of electronic and thermal Energies= -1201.580832      |           |          |           |
| Sum of electronic and thermal Enthalpies= -1201.579887    |           |          |           |
| Sum of electronic and thermal Free Energies= -1201.670876 |           |          |           |

daec[n=8]-1-E2 (dmf)

|   |           |           |           |
|---|-----------|-----------|-----------|
| C | -0.219416 | 3.010562  | 0.907215  |
| H | 0.503866  | 3.020060  | 1.717359  |
| C | 0.038802  | 3.776032  | -0.243954 |
| C | -0.905889 | 3.778393  | -1.277956 |
| H | -0.729688 | 4.371741  | -2.173334 |
| C | -2.084831 | 3.034205  | -1.163358 |
| H | -2.833602 | 3.045213  | -1.952621 |
| C | -2.332807 | 2.279666  | -0.021698 |
| O | -3.556076 | 1.647346  | 0.131897  |
| C | -1.393775 | 2.256284  | 1.032077  |
| O | -1.722185 | 1.497533  | 2.109021  |
| C | -0.793685 | 1.427991  | 3.189914  |
| H | -0.629961 | 2.415316  | 3.643136  |
| H | 0.169135  | 1.009819  | 2.865551  |
| H | -1.248463 | 0.761621  | 3.928368  |
| C | -4.105487 | -2.438984 | -0.463706 |
| H | -4.284657 | -3.500420 | -0.627541 |
| C | -2.888686 | -1.869857 | -0.868862 |
| C | -1.812660 | -2.725971 | -1.506207 |
| H | -1.169803 | -2.097789 | -2.138697 |
| H | -2.283199 | -3.465984 | -2.169611 |
| C | -0.931236 | -3.470239 | -0.480783 |
| H | -0.459289 | -2.732086 | 0.183266  |
| C | 0.137526  | -4.342622 | -1.154707 |
| H | 0.776654  | -3.706356 | -1.784919 |
| H | -0.361157 | -5.041372 | -1.844169 |
| C | 1.010391  | -5.162580 | -0.186224 |
| H | 1.694016  | -5.786937 | -0.782526 |
| C | 1.838143  | -4.352556 | 0.828986  |
| H | 2.399857  | -5.060041 | 1.458849  |
| H | 1.164422  | -3.813721 | 1.512499  |
| H | 0.365263  | -5.862797 | 0.367140  |
| H | -1.570770 | -4.097402 | 0.159227  |
| C | -2.675588 | -0.497441 | -0.660499 |
| H | -1.741950 | -0.041381 | -0.981215 |
| C | -3.665946 | 0.287044  | -0.060037 |
| C | -4.878768 | -0.284965 | 0.343183  |
| H | -5.636239 | 0.345072  | 0.803339  |
| C | -5.089482 | -1.648493 | 0.138174  |
| H | -6.033031 | -2.095671 | 0.446390  |
| C | 3.899813  | -0.359898 | 0.015670  |
| C | 2.818813  | -3.350507 | 0.202541  |
| H | 3.477089  | -3.875323 | -0.509223 |
| H | 2.256529  | -2.614841 | -0.388227 |
| C | 4.160972  | 1.932822  | -1.150290 |
| H | 4.927617  | 2.668302  | -1.440153 |
| H | 3.744990  | 1.539942  | -2.091973 |

|                                                           |          |           |           |
|-----------------------------------------------------------|----------|-----------|-----------|
| C                                                         | 3.678793 | -2.620326 | 1.245329  |
| H                                                         | 4.275413 | -3.362637 | 1.798116  |
| H                                                         | 3.017399 | -2.147945 | 1.989779  |
| C                                                         | 3.048865 | 2.650236  | -0.370207 |
| H                                                         | 3.447190 | 2.993181  | 0.598766  |
| H                                                         | 2.245261 | 1.939202  | -0.135964 |
| C                                                         | 2.459219 | 3.850273  | -1.122412 |
| H                                                         | 2.088342 | 3.524908  | -2.106528 |
| H                                                         | 3.258519 | 4.580503  | -1.320074 |
| C                                                         | 4.842277 | 0.786122  | -0.381795 |
| H                                                         | 5.656173 | 0.381381  | -1.003554 |
| H                                                         | 5.323454 | 1.190065  | 0.523487  |
| C                                                         | 1.320197 | 4.578078  | -0.369806 |
| H                                                         | 3.135959 | 0.014643  | 0.713616  |
| C                                                         | 4.621690 | -1.548514 | 0.669637  |
| H                                                         | 5.259898 | -1.171028 | 1.483935  |
| H                                                         | 5.304199 | -2.010793 | -0.061568 |
| H                                                         | 1.677901 | 4.860237  | 0.630614  |
| H                                                         | 1.099524 | 5.514001  | -0.901338 |
| H                                                         | 3.355749 | -0.698240 | -0.878908 |
| Sum of electronic and zero-point Energies= -1201.609431   |          |           |           |
| Sum of electronic and thermal Energies= -1201.580437      |          |           |           |
| Sum of electronic and thermal Enthalpies= -1201.579493    |          |           |           |
| Sum of electronic and thermal Free Energies= -1201.670537 |          |           |           |

daec[n=8]-2-TS (dmf)

|   |           |           |           |
|---|-----------|-----------|-----------|
| C | 1.930543  | -3.324803 | 0.356439  |
| H | 2.324012  | -4.280249 | 0.693343  |
| C | 0.563175  | -3.047292 | 0.552874  |
| C | 0.076145  | -1.816131 | 0.113553  |
| H | -0.969356 | -1.557039 | 0.231736  |
| C | 0.921600  | -0.883416 | -0.495064 |
| H | 0.504696  | 0.056092  | -0.836743 |
| C | 2.276435  | -1.144133 | -0.656726 |
| O | 3.154283  | -0.248508 | -1.257055 |
| C | 2.794448  | -2.391950 | -0.232735 |
| O | 4.125905  | -2.586672 | -0.428810 |
| C | 4.688647  | -3.828432 | -0.014024 |
| H | 4.580056  | -3.979946 | 1.069132  |
| H | 5.751686  | -3.770907 | -0.265631 |
| H | 4.235047  | -4.675522 | -0.547308 |
| C | 3.508072  | 3.574114  | 0.402073  |
| H | 3.608333  | 4.558666  | 0.856422  |
| C | 2.333020  | 3.241940  | -0.290557 |
| C | 1.124846  | 4.156505  | -0.319507 |
| H | 0.440364  | 3.809442  | -1.104347 |
| H | 1.415061  | 5.182736  | -0.584390 |
| C | 0.383477  | 4.174063  | 1.046744  |
| H | 0.534769  | 3.209428  | 1.552353  |
| C | -1.132161 | 4.434745  | 0.949912  |
| H | -1.328811 | 5.252394  | 0.238386  |
| H | -1.493635 | 4.788345  | 1.927522  |
| C | -1.940527 | 3.186024  | 0.555824  |
| H | -1.596495 | 2.813493  | -0.420156 |
| C | -3.458450 | 3.423074  | 0.519523  |
| H | -3.760717 | 3.906284  | 1.461927  |
| H | -3.697057 | 4.142333  | -0.280497 |
| H | -1.721341 | 2.386657  | 1.282265  |
| H | 0.853157  | 4.929299  | 1.691975  |
| C | 2.242659  | 1.974687  | -0.883611 |
| H | 1.366534  | 1.728805  | -1.475308 |
| C | 3.256465  | 1.027855  | -0.711693 |
| C | 4.422283  | 1.360714  | -0.017643 |
| H | 5.206599  | 0.016860  | 0.097463  |
| C | 4.547043  | 2.645348  | 0.521282  |
| H | 5.455657  | 2.915205  | 1.056697  |
| C | -5.142239 | -0.907687 | -0.442982 |
| C | -4.312161 | 2.154247  | 0.329156  |
| H | -4.111263 | 1.457916  | 1.158076  |
| H | -5.373260 | 2.435770  | 0.419746  |

|                                                           |           |           |           |
|-----------------------------------------------------------|-----------|-----------|-----------|
| C                                                         | -3.950190 | -3.153365 | 0.008731  |
| H                                                         | -4.637736 | -3.668592 | -0.678974 |
| H                                                         | -4.428882 | -3.193455 | 1.000475  |
| C                                                         | -4.106889 | 1.441644  | -1.017550 |
| H                                                         | -3.094311 | 1.016233  | -1.067547 |
| H                                                         | -4.155273 | 2.194893  | -1.820086 |
| C                                                         | -2.606092 | -3.911550 | 0.051972  |
| H                                                         | -1.994955 | -3.596818 | -0.806723 |
| H                                                         | -2.783779 | -4.988133 | -0.087208 |
| C                                                         | -1.815690 | -3.720902 | 1.362681  |
| H                                                         | -2.266308 | -4.359528 | 2.135735  |
| H                                                         | -1.929138 | -2.691752 | 1.731318  |
| C                                                         | -3.818261 | -1.691260 | -0.454103 |
| H                                                         | -3.079462 | -1.167739 | 0.168961  |
| H                                                         | -3.407465 | -1.692993 | -1.476537 |
| C                                                         | -0.318198 | -4.066682 | 1.266022  |
| H                                                         | -5.949724 | -1.567593 | -0.797326 |
| C                                                         | -5.145853 | 0.349058  | -1.335994 |
| H                                                         | -6.150145 | 0.800331  | -1.303193 |
| H                                                         | -4.994200 | 0.024901  | -2.377629 |
| H                                                         | 0.078691  | -4.202214 | 2.284023  |
| H                                                         | -0.200893 | -5.047350 | 0.778835  |
| H                                                         | -5.404854 | -0.643295 | 0.592560  |
| Sum of electronic and zero-point Energies= -1201.589379   |           |           |           |
| Sum of electronic and thermal Energies= -1201.561367      |           |           |           |
| Sum of electronic and thermal Enthalpies= -1201.560423    |           |           |           |
| Sum of electronic and thermal Free Energies= -1201.648117 |           |           |           |

daec[n=8]-2-E1 (dmf)

|   |           |           |           |
|---|-----------|-----------|-----------|
| C | 0.819253  | -3.218142 | -0.034110 |
| H | 0.314379  | -3.888406 | -0.723061 |
| C | 0.311605  | -3.071341 | 1.268376  |
| C | 0.982343  | -2.224650 | 2.161117  |
| H | 0.613843  | -2.108874 | 3.178708  |
| C | 2.131739  | -1.537875 | 1.761614  |
| H | 2.663740  | -0.890720 | 2.455850  |
| C | 2.618305  | -1.675651 | 0.464995  |
| O | 3.796038  | -1.055054 | 0.077500  |
| C | 1.962010  | -2.520718 | -0.454092 |
| O | 2.506330  | -2.597330 | -1.695827 |
| C | 1.872222  | -3.441840 | -2.654453 |
| H | 1.873501  | -4.491582 | -2.330007 |
| H | 2.463143  | -3.345746 | -3.569817 |
| H | 0.839866  | -3.121873 | -2.852838 |
| C | 4.014215  | 3.062832  | -0.546967 |
| H | 4.099426  | 4.135552  | -0.712352 |
| C | 2.748794  | 2.480282  | -0.397548 |
| C | 1.479191  | 3.306541  | -0.424507 |
| H | 0.715713  | 2.759819  | -0.993584 |
| H | 1.658043  | 4.249534  | -0.959221 |
| C | 0.935453  | 3.622658  | 0.988176  |
| H | 0.942464  | 2.702441  | 1.591600  |
| C | -0.487055 | 4.211747  | 0.993430  |
| H | -0.535913 | 5.064908  | 0.297971  |
| H | -0.697733 | 4.620450  | 1.993557  |
| C | -1.573348 | 3.186825  | 0.633271  |
| H | -1.352190 | 2.754611  | -0.351572 |
| C | -2.998782 | 3.758528  | 0.627699  |
| H | -3.212565 | 4.198193  | 1.614379  |
| H | -3.056260 | 4.588326  | -0.095211 |
| H | -1.524976 | 2.350981  | 1.350261  |
| H | 1.628917  | 4.318507  | 1.482557  |
| C | 2.656957  | 1.093834  | -0.189521 |
| H | 1.678522  | 0.633263  | -0.081527 |
| C | 3.810535  | 0.308862  | -0.120264 |
| C | 5.075112  | 0.893740  | -0.274567 |
| H | 5.961714  | 0.266081  | -0.224657 |
| C | 5.166120  | 2.268491  | -0.489378 |
| H | 6.146726  | 2.725405  | -0.611376 |
| C | -5.183261 | -0.136184 | -0.717218 |

|                                                           |           |           |           |
|-----------------------------------------------------------|-----------|-----------|-----------|
| C                                                         | -4.088716 | 2.721414  | 0.295588  |
| H                                                         | -4.035909 | 1.900989  | 1.027746  |
| H                                                         | -5.077344 | 3.187529  | 0.431332  |
| C                                                         | -4.090161 | -2.415198 | -0.281687 |
| H                                                         | -4.662811 | -2.916512 | -1.076339 |
| H                                                         | -4.725417 | -2.457786 | 0.617680  |
| C                                                         | -3.997620 | 2.157729  | -1.131110 |
| H                                                         | -3.026823 | 1.664306  | -1.275126 |
| H                                                         | -4.013949 | 2.999783  | -1.841248 |
| C                                                         | -2.786343 | -3.195707 | -0.015514 |
| H                                                         | -2.016803 | -2.877225 | -0.734947 |
| H                                                         | -2.955350 | -4.266581 | -0.204904 |
| C                                                         | -2.265906 | -3.045488 | 1.422296  |
| H                                                         | -3.035531 | -3.435592 | 2.104950  |
| H                                                         | -2.140713 | -1.982587 | 1.677017  |
| C                                                         | -3.877485 | -0.949510 | -0.695946 |
| H                                                         | -3.153522 | -0.471671 | -0.019556 |
| H                                                         | -3.414648 | -0.933393 | -1.695716 |
| C                                                         | -0.942738 | -3.798381 | 1.712878  |
| H                                                         | -5.982452 | -0.755852 | -1.153508 |
| C                                                         | -5.118081 | 1.177521  | -1.519765 |
| H                                                         | -6.090445 | 1.688611  | -1.438772 |
| H                                                         | -4.995938 | 0.925522  | -2.584916 |
| H                                                         | -0.873825 | -3.968413 | 2.795624  |
| H                                                         | -0.988257 | -4.791275 | 1.242564  |
| H                                                         | -5.495719 | 0.066450  | 0.318328  |
| Sum of electronic and zero-point Energies= -1201.603742   |           |           |           |
| Sum of electronic and thermal Energies= -1201.574710      |           |           |           |
| Sum of electronic and thermal Enthalpies= -1201.573766    |           |           |           |
| Sum of electronic and thermal Free Energies= -1201.665755 |           |           |           |

daec[n=8]-2-E2 (dmf)

|   |           |           |           |
|---|-----------|-----------|-----------|
| C | 0.881456  | -2.689313 | 1.215841  |
| H | 0.594118  | -2.694681 | 2.263549  |
| C | 0.081456  | -3.383884 | 0.289582  |
| C | 0.467940  | -3.396660 | -1.055612 |
| H | -0.121014 | -3.945466 | -1.787404 |
| C | 1.615817  | -2.708518 | -1.469091 |
| H | 1.923385  | -2.709573 | -2.512585 |
| C | 2.396919  | -2.019184 | -0.548641 |
| O | 3.575916  | -1.426834 | -0.971383 |
| C | 2.042689  | -2.017171 | 0.819639  |
| O | 2.881974  | -1.353763 | 1.655556  |
| C | 2.548306  | -1.301062 | 3.041771  |
| H | 1.583318  | -0.801513 | 3.203544  |
| H | 3.343074  | -0.717866 | 3.515307  |
| H | 2.519726  | -2.305389 | 3.486053  |
| C | 4.112029  | 2.708905  | -0.944267 |
| H | 4.277928  | 3.784953  | -0.945980 |
| C | 2.816615  | 2.205045  | -0.764271 |
| C | 1.629058  | 3.116041  | -0.529613 |
| H | 0.769715  | 2.726163  | -1.090921 |
| H | 1.840442  | 4.117420  | -0.929280 |
| C | 1.251972  | 3.238322  | 0.965252  |
| H | 1.240262  | 2.234867  | 1.417017  |
| C | -0.108800 | 3.913808  | 1.215496  |
| H | -0.155499 | 4.866117  | 0.663356  |
| H | -0.183921 | 4.175196  | 2.282140  |
| C | -1.307553 | 3.032862  | 0.831655  |
| H | -1.223404 | 2.745116  | -0.224658 |
| C | -2.673398 | 3.693462  | 1.070038  |
| H | -2.748194 | 3.990499  | 2.127748  |
| H | -2.734368 | 4.626082  | 0.486089  |
| H | -1.257688 | 2.094330  | 1.407690  |
| H | 2.046140  | 3.796933  | 1.481740  |
| C | 2.620448  | 0.814570  | -0.771034 |
| H | 1.617630  | 0.413678  | -0.645599 |
| C | 3.701441  | -0.053476 | -0.936070 |
| C | 4.994799  | 0.451823  | -1.120906 |
| H | 5.823061  | -0.239627 | -1.256746 |

|                                                           |           |           |           |
|-----------------------------------------------------------|-----------|-----------|-----------|
| C                                                         | 5.189302  | 1.833102  | -1.125849 |
| H                                                         | 6.192689  | 2.229916  | -1.270810 |
| C                                                         | -5.304229 | 0.206273  | -0.567356 |
| C                                                         | -3.874633 | 2.795578  | 0.716977  |
| H                                                         | -3.817376 | 1.871720  | 1.312918  |
| H                                                         | -4.801563 | 3.302115  | 1.028916  |
| C                                                         | -4.374190 | -2.183528 | -0.604064 |
| H                                                         | -5.067161 | -2.509922 | -1.393978 |
| H                                                         | -4.915297 | -2.323812 | 0.345572  |
| C                                                         | -3.976851 | 2.450311  | -0.776950 |
| H                                                         | -3.071125 | 1.918904  | -1.099441 |
| H                                                         | -3.993967 | 3.389570  | -1.352381 |
| C                                                         | -3.123698 | -3.086827 | -0.610466 |
| H                                                         | -2.405061 | -2.711675 | -1.354932 |
| H                                                         | -3.404112 | -4.098247 | -0.941488 |
| C                                                         | -2.448707 | -3.209220 | 0.764263  |
| H                                                         | -3.173958 | -3.653366 | 1.462286  |
| H                                                         | -2.208203 | -2.213150 | 1.164866  |
| C                                                         | -4.077824 | -0.689286 | -0.814739 |
| H                                                         | -3.251357 | -0.376381 | -0.159718 |
| H                                                         | -3.717428 | -0.547553 | -1.846229 |
| C                                                         | -1.171218 | -4.086045 | 0.776497  |
| H                                                         | -6.194272 | -0.281918 | -0.994617 |
| C                                                         | -5.210250 | 1.619971  | -1.172841 |
| H                                                         | -6.122298 | 2.178049  | -0.908287 |
| H                                                         | -5.219880 | 1.526327  | -2.270152 |
| H                                                         | -0.998400 | -4.430731 | 1.804971  |
| H                                                         | -1.352309 | -4.985696 | 0.171061  |
| H                                                         | -5.490139 | 0.268015  | 0.515559  |
| Sum of electronic and zero-point Energies= -1201.604514   |           |           |           |
| Sum of electronic and thermal Energies= -1201.575598      |           |           |           |
| Sum of electronic and thermal Enthalpies= -1201.574654    |           |           |           |
| Sum of electronic and thermal Free Energies= -1201.665198 |           |           |           |

daec[n=8]-3-TS (dmf)

|   |           |           |           |
|---|-----------|-----------|-----------|
| C | -2.351452 | -3.339160 | 0.576843  |
| H | -2.845948 | -4.309865 | 0.573370  |
| C | -0.948525 | -3.255501 | 0.546101  |
| C | -0.390960 | -1.973552 | 0.573508  |
| H | 0.685207  | -1.836751 | 0.584376  |
| C | -1.185261 | -0.823578 | 0.595858  |
| H | -0.689768 | 0.137293  | 0.596402  |
| C | -2.577043 | -0.917492 | 0.609634  |
| O | -3.450095 | 0.156266  | 0.667610  |
| C | -3.162037 | -2.203008 | 0.620190  |
| O | -4.526527 | -2.348438 | 0.712426  |
| C | -5.213583 | -2.275504 | -0.540896 |
| H | -6.279783 | -2.387815 | -0.317538 |
| H | -4.896354 | -3.086760 | -1.212967 |
| H | -5.046747 | -1.310374 | -1.037455 |
| C | -2.823349 | 3.691650  | -1.465714 |
| H | -2.668603 | 4.595316  | -2.053066 |
| C | -1.857879 | 3.305236  | -0.525252 |
| C | -0.531333 | 4.041167  | -0.426766 |
| H | -0.612356 | 4.999942  | -0.956027 |
| H | 0.194949  | 3.449079  | -1.005006 |
| C | 0.050277  | 4.286908  | 0.982798  |
| H | -0.393966 | 5.202509  | 1.397865  |
| C | 1.587782  | 4.401717  | 0.978705  |
| H | 1.916569  | 4.888367  | 1.909123  |
| H | 1.903972  | 5.066509  | 0.158955  |
| C | 2.304181  | 3.044830  | 0.854911  |
| H | 1.916579  | 2.495546  | -0.015364 |
| C | 3.831993  | 3.168081  | 0.745437  |
| H | 4.189819  | 3.826812  | 1.552360  |
| H | 4.089518  | 3.677536  | -0.196994 |
| H | 2.052807  | 2.434223  | 1.737312  |
| H | -0.232834 | 3.477073  | 1.668814  |
| C | -2.089131 | 2.144224  | 0.231129  |
| H | -1.392889 | 1.869531  | 1.014151  |

|                                                           |           |           |           |
|-----------------------------------------------------------|-----------|-----------|-----------|
| C                                                         | -3.200816 | 1.336392  | -0.023553 |
| C                                                         | -4.160129 | 1.728926  | -0.963677 |
| H                                                         | -5.033335 | 1.103615  | -1.131574 |
| C                                                         | -3.972363 | 2.919486  | -1.667712 |
| H                                                         | -4.717334 | 3.235781  | -2.395516 |
| C                                                         | 5.206347  | -1.391945 | -1.372173 |
| C                                                         | 4.603783  | 1.838382  | 0.835496  |
| H                                                         | 4.349473  | 1.340460  | 1.785217  |
| H                                                         | 5.679306  | 2.067614  | 0.895054  |
| C                                                         | 3.366816  | -2.954684 | -0.427362 |
| H                                                         | 4.147290  | -3.678425 | -0.141939 |
| H                                                         | 3.218236  | -2.309805 | 0.451596  |
| C                                                         | 4.383921  | 0.851016  | -0.324084 |
| H                                                         | 4.602260  | 1.357236  | -1.278683 |
| H                                                         | 3.325933  | 0.555216  | -0.368597 |
| C                                                         | 2.049159  | -3.694725 | -0.714314 |
| H                                                         | 2.214509  | -4.475686 | -1.471926 |
| H                                                         | 1.343795  | -2.986751 | -1.169940 |
| C                                                         | 1.417975  | -4.325207 | 0.547308  |
| H                                                         | 1.654361  | -3.706412 | 1.425598  |
| H                                                         | 1.886910  | -5.300656 | 0.738220  |
| C                                                         | 3.856811  | -2.098051 | -1.604509 |
| H                                                         | 3.951284  | -2.733643 | -2.498859 |
| H                                                         | 3.083384  | -1.353127 | -1.847059 |
| C                                                         | -0.107031 | -4.524923 | 0.482323  |
| H                                                         | 5.979961  | -2.160294 | -1.216406 |
| C                                                         | 5.273973  | -0.397477 | -0.196574 |
| H                                                         | 5.035230  | -0.915697 | 0.744478  |
| H                                                         | 6.319659  | -0.067081 | -0.095358 |
| H                                                         | -0.364772 | -5.072375 | -0.438512 |
| H                                                         | -0.414160 | -5.186074 | 1.306457  |
| H                                                         | 5.488051  | -0.863944 | -2.296771 |
| Sum of electronic and zero-point Energies= -1201.585910   |           |           |           |
| Sum of electronic and thermal Energies= -1201.557648      |           |           |           |
| Sum of electronic and thermal Enthalpies= -1201.556704    |           |           |           |
| Sum of electronic and thermal Free Energies= -1201.645218 |           |           |           |

daec[n=8]-3-E1 (dmf)

|   |           |           |           |
|---|-----------|-----------|-----------|
| C | 1.362037  | -3.060301 | 0.365382  |
| H | 1.013575  | -3.554398 | 1.267688  |
| C | 0.763386  | -3.388787 | -0.863371 |
| C | 1.228810  | -2.765846 | -2.028650 |
| H | 0.787982  | -3.015724 | -2.991995 |
| C | 2.260723  | -1.824162 | -1.965135 |
| H | 2.633410  | -1.338777 | -2.864654 |
| C | 2.841781  | -1.497493 | -0.744394 |
| O | 3.921398  | -0.628835 | -0.710892 |
| C | 2.399646  | -2.121010 | 0.442093  |
| O | 3.034097  | -1.751799 | 1.584291  |
| C | 2.606797  | -2.341377 | 2.811238  |
| H | 3.234261  | -1.895360 | 3.588079  |
| H | 2.753583  | -3.430146 | 2.805621  |
| H | 1.552213  | -2.114921 | 3.019910  |
| C | 3.556209  | 3.314648  | 0.593056  |
| H | 3.489195  | 4.346111  | 0.935324  |
| C | 2.384615  | 2.568882  | 0.397847  |
| C | 1.015889  | 3.183133  | 0.609913  |
| H | 1.054525  | 3.896316  | 1.445645  |
| H | 0.312064  | 2.925333  | 0.900176  |
| C | 0.481173  | 3.916487  | -0.641041 |
| H | 1.131928  | 4.779167  | -0.845093 |
| C | -0.978389 | 4.388375  | -0.506753 |
| H | -1.192660 | 5.114603  | -1.305631 |
| H | -1.100538 | 4.934096  | 0.442629  |
| C | -2.004654 | 3.247734  | -0.585404 |
| H | -1.763184 | 2.485931  | 0.167912  |
| C | -3.459332 | 3.705642  | -0.399723 |
| H | -3.670137 | 4.522101  | -1.108060 |
| H | -3.580313 | 4.137320  | 0.606872  |
| H | -1.906048 | 2.750163  | -1.564004 |

|                                                           |           |           |           |
|-----------------------------------------------------------|-----------|-----------|-----------|
| H                                                         | 0.568034  | 3.252769  | -1.514869 |
| C                                                         | 2.489391  | 1.237281  | -0.034967 |
| H                                                         | 1.587265  | 0.650801  | -0.190287 |
| C                                                         | 3.743144  | 0.663275  | -0.264097 |
| C                                                         | 4.911317  | 1.411534  | -0.071956 |
| H                                                         | 5.877470  | 0.946682  | -0.253807 |
| C                                                         | 4.807637  | 2.735455  | 0.355735  |
| H                                                         | 5.714056  | 3.317903  | 0.512080  |
| C                                                         | -5.414519 | -0.826514 | 1.165373  |
| C                                                         | -4.502047 | 2.591611  | -0.607853 |
| H                                                         | -4.389266 | 2.183039  | -1.625192 |
| H                                                         | -5.509706 | 3.033880  | -0.568611 |
| C                                                         | -3.600033 | -2.295247 | 0.031890  |
| H                                                         | -4.356617 | -3.036788 | -0.271826 |
| H                                                         | -3.526064 | -1.578183 | -0.799238 |
| C                                                         | -4.421927 | 1.440685  | 0.407061  |
| H                                                         | -4.573089 | 1.840530  | 1.423312  |
| H                                                         | -3.409676 | 1.015433  | 0.395277  |
| C                                                         | -2.240228 | -2.987835 | 0.205886  |
| H                                                         | -2.291095 | -3.692604 | 1.051397  |
| H                                                         | -1.488945 | -2.233043 | 0.482976  |
| C                                                         | -1.776762 | -3.740505 | -1.048376 |
| H                                                         | -1.781303 | -3.057535 | -1.911582 |
| H                                                         | -2.502452 | -4.534579 | -1.280334 |
| C                                                         | -4.075741 | -1.576545 | 1.303428  |
| H                                                         | -4.176583 | -2.317499 | 2.111676  |
| H                                                         | -3.293260 | -0.878292 | 1.636236  |
| C                                                         | -0.376759 | -4.387314 | -0.928060 |
| H                                                         | -6.202599 | -1.549404 | 0.902111  |
| C                                                         | -5.441680 | 0.323791  | 0.140217  |
| H                                                         | -5.278960 | -0.075690 | -0.872278 |
| H                                                         | -6.454805 | 0.755380  | 0.131683  |
| H                                                         | -0.353704 | -5.032333 | -0.038524 |
| H                                                         | -0.225494 | -5.043082 | -1.796983 |
| H                                                         | -5.689931 | -0.424899 | 2.153155  |
| Sum of electronic and zero-point Energies= -1201.609165   |           |           |           |
| Sum of electronic and thermal Energies= -1201.580158      |           |           |           |
| Sum of electronic and thermal Enthalpies= -1201.579214    |           |           |           |
| Sum of electronic and thermal Free Energies= -1201.670379 |           |           |           |

daec[n=8]-3-E2 (dmf)

|   |           |           |           |
|---|-----------|-----------|-----------|
| C | 1.263460  | -2.747811 | -1.117079 |
| H | 0.912419  | -2.868332 | -2.140648 |
| C | 0.678288  | -3.481353 | -0.071563 |
| C | 1.181117  | -3.300118 | 1.224455  |
| H | 0.754154  | -3.863750 | 2.051937  |
| C | 2.223385  | -2.400933 | 1.472995  |
| H | 2.611168  | -2.258201 | 2.479315  |
| C | 2.784191  | -1.672771 | 0.425963  |
| O | 3.861491  | -0.837157 | 0.675555  |
| C | 2.306841  | -1.849201 | -0.886518 |
| O | 2.816744  | -1.119510 | -1.931647 |
| C | 4.109878  | -1.543917 | -2.386264 |
| H | 4.377637  | -0.878283 | -3.212905 |
| H | 4.073213  | -2.580617 | -2.750690 |
| H | 4.863546  | -1.462281 | -1.593221 |
| C | 3.473111  | 3.310256  | 0.860780  |
| H | 3.400453  | 4.394541  | 0.928100  |
| C | 2.304118  | 2.537383  | 0.792518  |
| C | 0.935607  | 3.187408  | 0.769734  |
| H | 0.908286  | 4.019148  | 1.488610  |
| H | 0.188252  | 2.456312  | 1.103161  |
| C | 0.546036  | 3.730188  | -0.623643 |
| H | 1.240008  | 4.540762  | -0.889080 |
| C | -0.903642 | 4.242939  | -0.705423 |
| H | -1.014116 | 4.856065  | -1.612786 |
| H | -1.101593 | 4.916558  | 0.143797  |
| C | -1.954084 | 3.122185  | -0.735640 |
| H | -1.809317 | 2.460460  | 0.128949  |
| C | -3.403905 | 3.630506  | -0.752920 |

|                                                           |           |           |           |
|-----------------------------------------------------------|-----------|-----------|-----------|
| H                                                         | -3.513079 | 4.371984  | -1.559855 |
| H                                                         | -3.612671 | 4.169166  | 0.185389  |
| H                                                         | -1.779780 | 2.499543  | -1.628321 |
| H                                                         | 0.694577  | 2.940025  | -1.375460 |
| C                                                         | 2.415359  | 1.139992  | 0.717943  |
| H                                                         | 1.515798  | 0.531324  | 0.675834  |
| C                                                         | 3.673866  | 0.531249  | 0.706377  |
| C                                                         | 4.838858  | 1.304138  | 0.771930  |
| H                                                         | 5.807783  | 0.810563  | 0.768673  |
| C                                                         | 4.728025  | 2.693082  | 0.850339  |
| H                                                         | 5.631492  | 3.297785  | 0.906907  |
| C                                                         | -5.628445 | -0.706191 | 1.003407  |
| C                                                         | -4.457073 | 2.525824  | -0.956549 |
| H                                                         | -4.261604 | 2.020961  | -1.916521 |
| H                                                         | -5.449464 | 2.992552  | -1.056182 |
| C                                                         | -3.723430 | -2.245174 | 0.147417  |
| H                                                         | -4.461912 | -2.974684 | -0.222781 |
| H                                                         | -3.524158 | -1.561959 | -0.691560 |
| C                                                         | -4.509289 | 1.472321  | 0.160733  |
| H                                                         | -4.742600 | 1.966392  | 1.118284  |
| H                                                         | -3.514354 | 1.024446  | 0.284035  |
| C                                                         | -2.419511 | -2.971568 | 0.509007  |
| H                                                         | -2.604388 | -3.670102 | 1.340813  |
| H                                                         | -1.692591 | -2.235649 | 0.884867  |
| C                                                         | -1.808649 | -3.739820 | -0.670347 |
| H                                                         | -1.665078 | -3.054640 | -1.519760 |
| H                                                         | -2.520443 | -4.506566 | -1.011335 |
| C                                                         | -4.325226 | -1.463119 | 1.324335  |
| H                                                         | -4.526805 | -2.162665 | 2.150472  |
| H                                                         | -3.572839 | -0.758124 | 1.708462  |
| C                                                         | -0.465591 | -4.436343 | -0.353673 |
| H                                                         | -6.403812 | -1.435556 | 0.720989  |
| C                                                         | -5.534030 | 0.359853  | -0.105224 |
| H                                                         | -5.295605 | -0.123469 | -1.064747 |
| H                                                         | -6.529874 | 0.810970  | -0.237657 |
| H                                                         | -0.599517 | -5.106419 | 0.506896  |
| H                                                         | -0.197964 | -5.072856 | -1.209313 |
| H                                                         | -5.986683 | -0.226091 | 1.927540  |
| Sum of electronic and zero-point Energies= -1201.605348   |           |           |           |
| Sum of electronic and thermal Energies= -1201.576135      |           |           |           |
| Sum of electronic and thermal Enthalpies= -1201.575191    |           |           |           |
| Sum of electronic and thermal Free Energies= -1201.667026 |           |           |           |

daec[n=8]-4-TS (dmf)

|   |           |           |           |
|---|-----------|-----------|-----------|
| C | 1.032222  | -3.607559 | 0.094818  |
| H | 1.013293  | -4.657347 | 0.384532  |
| C | -0.164600 | -2.883125 | -0.038273 |
| C | -0.056635 | -1.538678 | -0.411430 |
| H | -0.942048 | -0.925821 | -0.541198 |
| C | 1.183181  | -0.933600 | -0.614719 |
| H | 1.210788  | 0.113770  | -0.886564 |
| C | 2.366073  | -1.650669 | -0.444728 |
| O | 3.627827  | -1.088302 | -0.603748 |
| C | 2.286336  | -3.016347 | -0.099083 |
| O | 3.412062  | -3.767915 | 0.133260  |
| C | 4.198383  | -4.066075 | -1.026971 |
| H | 3.606682  | -4.623869 | -1.767620 |
| H | 5.027041  | -4.693173 | -0.681970 |
| H | 4.599176  | -3.155728 | -1.488699 |
| C | 4.193531  | 2.654639  | 1.166168  |
| H | 4.304620  | 3.615324  | 1.666728  |
| C | 3.436432  | 2.570644  | -0.010953 |
| C | 2.606854  | 3.733309  | -0.519582 |
| H | 3.028762  | 4.688317  | -0.178291 |
| H | 2.610231  | 3.748428  | -1.618960 |
| C | 1.150663  | 3.587403  | -0.014391 |
| H | 0.802982  | 2.578799  | -0.275360 |
| C | 0.156567  | 4.625137  | -0.553989 |
| H | 0.145172  | 4.589407  | -1.655038 |
| H | 0.503744  | 5.633918  | -0.283145 |

|   |           |           |           |
|---|-----------|-----------|-----------|
| C | -1.276903 | 4.428589  | -0.015243 |
| H | -1.877167 | 5.317283  | -0.262930 |
| C | -2.002981 | 3.178712  | -0.544443 |
| H | -1.363185 | 2.293011  | -0.418316 |
| H | -2.161675 | 3.286913  | -1.629440 |
| H | -1.237700 | 4.386753  | 1.085194  |
| H | 1.156494  | 3.629886  | 1.085740  |
| C | 3.321167  | 1.323236  | -0.645287 |
| H | 2.783569  | 1.248354  | -1.586664 |
| C | 3.839883  | 0.173413  | -0.047522 |
| C | 4.594411  | 0.259059  | 1.125688  |
| H | 5.004339  | -0.646286 | 1.566526  |
| C | 4.788455  | 1.511810  | 1.713504  |
| H | 5.379962  | 1.591513  | 2.623688  |
| C | -6.173102 | 0.138635  | -0.208730 |
| C | -3.347900 | 2.902450  | 0.148233  |
| H | -3.168318 | 2.758178  | 1.225747  |
| H | -3.999433 | 3.786912  | 0.064550  |
| C | -5.093849 | -1.965840 | 0.870881  |
| H | -4.702952 | -1.260191 | 1.619427  |
| H | -6.013213 | -2.387118 | 1.304793  |
| C | -4.082255 | 1.671424  | -0.410726 |
| H | -4.377557 | 1.866927  | -1.454300 |
| H | -3.377138 | 0.827835  | -0.447892 |
| C | -4.049526 | -3.087411 | 0.682827  |
| H | -4.371319 | -3.771216 | -0.118774 |
| H | -3.998449 | -3.689993 | 1.602434  |
| C | -2.661600 | -2.516774 | 0.364849  |
| H | -2.393575 | -1.798204 | 1.154639  |
| H | -2.731043 | -1.935760 | -0.562773 |
| C | -5.457775 | -1.210252 | -0.422725 |
| H | -4.556738 | -1.038336 | -1.025627 |
| H | -6.103628 | -1.857654 | -1.035506 |
| C | -1.520099 | -3.533558 | 0.218134  |
| H | -6.556207 | 0.484697  | -1.181437 |
| C | -5.321722 | 1.269351  | 0.406964  |
| H | -5.003327 | 0.990084  | 1.422830  |
| H | -5.969031 | 2.151830  | 0.529816  |
| H | -1.752742 | -4.231818 | -0.601909 |
| H | -1.451459 | -4.154669 | 1.123823  |
| H | -7.059324 | -0.018757 | 0.426239  |

Sum of electronic and zero-point Energies= -1201.591048

Sum of electronic and thermal Energies= -1201.562626

Sum of electronic and thermal Enthalpies= -1201.561682

Sum of electronic and thermal Free Energies= -1201.650430

daec[n=8]-4-E1 (dmf)

|   |           |           |           |
|---|-----------|-----------|-----------|
| C | 0.335628  | -3.331804 | -0.520981 |
| H | -0.129988 | -3.950442 | -1.286293 |
| C | -0.368960 | -2.984776 | 0.638365  |
| C | 0.285983  | -2.188435 | 1.592229  |
| H | -0.229019 | -1.911694 | 2.510797  |
| C | 1.593975  | -1.751460 | 1.387703  |
| H | 2.096552  | -1.145787 | 2.138362  |
| C | 2.281014  | -2.097438 | 0.219264  |
| O | 3.606312  | -1.748610 | 0.026034  |
| C | 1.650245  | -2.902888 | -0.745182 |
| O | 2.295956  | -3.339241 | -1.874764 |
| C | 2.633470  | -2.328109 | -2.832819 |
| H | 1.740934  | -1.760759 | -3.133595 |
| H | 3.033836  | -2.857273 | -3.703774 |
| H | 3.394368  | -1.638650 | -2.449107 |
| C | 4.902582  | 2.158854  | 0.676379  |
| H | 5.262239  | 3.172447  | 0.845175  |
| C | 3.672503  | 1.961319  | 0.030857  |
| C | 2.836870  | 3.134608  | -0.447311 |
| H | 3.378620  | 4.068970  | -0.246214 |
| H | 2.719687  | 3.073106  | -1.540428 |
| C | 1.434240  | 3.200698  | 0.188599  |
| H | 0.912897  | 2.254893  | -0.010106 |

|   |           |           |           |
|---|-----------|-----------|-----------|
| C | 0.592582  | 4.378440  | -0.327840 |
| H | 0.610878  | 4.384400  | -1.429556 |
| H | 1.066240  | 5.319844  | -0.010689 |
| C | -0.872613 | 4.358246  | 0.149477  |
| H | -1.331062 | 5.337546  | -0.056379 |
| C | -1.722131 | 3.260840  | -0.509610 |
| H | -1.234650 | 2.284404  | -0.371888 |
| H | -1.749057 | 3.434365  | -1.597472 |
| H | -0.896477 | 4.234658  | 1.244147  |
| H | 1.532422  | 3.273314  | 1.282508  |
| C | 3.227155  | 0.646014  | -0.176471 |
| H | 2.283185  | 0.462644  | -0.684622 |
| C | 3.992396  | -0.437766 | 0.262818  |
| C | 5.222249  | -0.238374 | 0.896648  |
| H | 5.803367  | -1.097499 | 1.222658  |
| C | 5.671635  | 1.068419  | 1.096489  |
| H | 6.626105  | 1.236648  | 1.591949  |
| C | -6.107610 | 0.592204  | -0.643337 |
| C | -3.158027 | 3.158573  | 0.025089  |
| H | -3.125942 | 3.008589  | 1.116233  |
| H | -3.689528 | 4.109636  | -0.137866 |
| C | -5.201584 | -1.354647 | 0.809389  |
| H | -4.796996 | -0.578130 | 1.475380  |
| H | -6.182884 | -1.628141 | 1.226713  |
| C | -3.939236 | 2.003262  | -0.619050 |
| H | -4.045635 | 2.190134  | -1.700024 |
| H | -3.332942 | 1.090390  | -0.529024 |
| C | -4.262667 | -2.574827 | 0.872327  |
| H | -4.590405 | -3.338765 | 0.149319  |
| H | -4.349877 | -3.037598 | 1.867422  |
| C | -2.788602 | -2.220202 | 0.623529  |
| H | -2.502456 | -1.399440 | 1.298788  |
| H | -2.655144 | -1.837034 | -0.397993 |
| C | -5.409619 | -0.781619 | -0.603350 |
| H | -4.445188 | -0.709158 | -1.123362 |
| H | -6.008189 | -1.497257 | -1.187898 |
| C | -1.813889 | -3.396788 | 0.839347  |
| H | -6.317288 | 0.844004  | -1.694672 |
| C | -5.324819 | 1.757989  | -0.004300 |
| H | -5.210875 | 1.583313  | 1.076107  |
| H | -5.929781 | 2.673418  | -0.096390 |
| H | -2.065481 | -4.215628 | 0.151482  |
| H | -1.948567 | -3.786231 | 1.859468  |
| H | -7.088651 | 0.513563  | -0.148870 |

Sum of electronic and zero-point Energies= -1201.602987

Sum of electronic and thermal Energies= -1201.573616

Sum of electronic and thermal Enthalpies= -1201.572672

Sum of electronic and thermal Free Energies= -1201.665142

daec[n=8]-4-E2 (dmf)

|   |           |           |           |
|---|-----------|-----------|-----------|
| C | 0.409805  | -2.642573 | 0.745325  |
| H | -0.016117 | -2.714924 | 1.744838  |
| C | -0.344626 | -3.016481 | -0.378954 |
| C | 0.257831  | -2.918611 | -1.640657 |
| H | -0.300699 | -3.208356 | -2.529120 |
| C | 1.568537  | -2.448410 | -1.778466 |
| H | 2.036144  | -2.373281 | -2.757785 |
| C | 2.300617  | -2.073279 | -0.653349 |
| O | 3.624052  | -1.690302 | -0.796516 |
| C | 1.719588  | -2.176291 | 0.625604  |
| O | 2.408671  | -1.787770 | 1.748353  |
| C | 3.393610  | -2.728386 | 2.198714  |
| H | 2.920620  | -3.676948 | 2.491364  |
| H | 3.872833  | -2.276650 | 3.072972  |
| H | 4.149539  | -2.922307 | 1.427456  |
| C | 4.892153  | 2.198489  | -0.001732 |
| H | 5.249405  | 3.206580  | 0.201424  |
| C | 3.567972  | 2.006182  | -0.421392 |
| C | 2.637103  | 3.188583  | -0.621033 |
| H | 3.180583  | 4.113780  | -0.384557 |



|   |           |           |           |
|---|-----------|-----------|-----------|
| H | 2.363642  | 3.256408  | -1.685783 |
| C | 1.339916  | 3.127678  | 0.207868  |
| H | 0.790176  | 2.215195  | -0.058856 |
| C | 0.442669  | 4.358826  | 0.000358  |
| H | 0.333591  | 4.553442  | -1.078732 |
| H | 0.950521  | 5.241237  | 0.418066  |
| C | -0.958180 | 4.227459  | 0.628518  |
| H | -1.430064 | 5.221005  | 0.669682  |
| C | -1.882598 | 3.266475  | -0.133832 |
| H | -1.383769 | 2.293258  | -0.253720 |
| H | -2.036729 | 3.654107  | -1.153765 |
| H | -0.858909 | 3.893345  | 1.673809  |
| H | 1.590522  | 3.034651  | 1.275518  |
| C | 3.123821  | 0.697409  | -0.677457 |
| H | 2.105142  | 0.523140  | -1.015181 |
| C | 3.989423  | -0.386033 | -0.510284 |
| C | 5.314875  | -0.189227 | -0.106277 |
| H | 5.974031  | -1.046846 | 0.004126  |
| C | 5.757560  | 1.108907  | 0.146435  |
| H | 6.785335  | 1.271482  | 0.466266  |
| C | -6.247573 | 0.578663  | -0.319410 |
| C | -3.246073 | 3.027310  | 0.530142  |
| H | -3.087742 | 2.657702  | 1.555995  |
| H | -3.790573 | 3.979959  | 0.628005  |
| C | -5.164260 | -1.599412 | 0.579697  |
| H | -4.700876 | -0.966057 | 1.350596  |
| H | -6.087464 | -1.994966 | 1.030142  |
| C | -4.097736 | 2.011769  | -0.245907 |
| H | -4.329325 | 2.415182  | -1.245110 |
| H | -3.484572 | 1.115409  | -0.417513 |
| C | -4.204415 | -2.765195 | 0.273593  |
| H | -4.576555 | -3.338248 | -0.590701 |
| H | -4.204877 | -3.462140 | 1.125648  |
| C | -2.758785 | -2.313219 | 0.014837  |
| H | -2.411173 | -1.723631 | 0.876865  |
| H | -2.717068 | -1.641086 | -0.854120 |
| C | -5.540349 | -0.750876 | -0.647642 |
| H | -4.643636 | -0.542825 | -1.246601 |
| H | -6.198202 | -1.348110 | -1.297671 |
| C | -1.777879 | -3.481533 | -0.215593 |
| H | -6.580180 | 1.036945  | -1.263877 |
| C | -5.401843 | 1.609012  | 0.456965  |
| H | -5.163188 | 1.218486  | 1.457628  |
| H | -6.016605 | 2.506832  | 0.625595  |
| H | -2.085245 | -4.046539 | -1.106355 |
| H | -1.843648 | -4.172969 | 0.637317  |
| H | -7.163626 | 0.368886  | 0.255004  |

Sum of electronic and zero-point Energies= -1201.603967

Sum of electronic and thermal Energies= -1201.574621

Sum of electronic and thermal Enthalpies= -1201.573677

Sum of electronic and thermal Free Energies= -1201.665904

daec[n=8]-5-TS (dmf)

|   |           |           |           |
|---|-----------|-----------|-----------|
| C | 2.043499  | -3.403951 | -0.027151 |
| H | 2.290882  | -4.427243 | 0.251999  |
| C | 0.703918  | -3.002390 | -0.150262 |
| C | 0.479049  | -1.670902 | -0.516637 |
| H | -0.524464 | -1.288104 | -0.658522 |
| C | 1.530792  | -0.781234 | -0.709626 |
| H | 1.287967  | 0.236033  | -0.979030 |
| C | 2.859500  | -1.175849 | -0.559868 |
| O | 3.930920  | -0.306539 | -0.759416 |
| C | 3.120662  | -2.525485 | -0.229722 |
| O | 4.376263  | -3.064368 | -0.138732 |
| C | 5.335572  | -2.419391 | 0.709542  |
| H | 4.869118  | -2.069084 | 1.640126  |
| H | 5.823400  | -1.580666 | 0.203110  |
| H | 6.082675  | -3.183515 | 0.950922  |
| C | 3.385813  | 3.528243  | 0.822713  |
| H | 3.196504  | 4.491864  | 1.293363  |

|   |           |           |           |
|---|-----------|-----------|-----------|
| C | 2.639867  | 3.144760  | -0.300580 |
| C | 1.409717  | 3.907058  | -0.756393 |
| H | 1.275121  | 3.789219  | -1.840874 |
| H | 1.509198  | 4.981459  | -0.551593 |
| C | 0.171514  | 3.334592  | -0.016815 |
| H | 0.230933  | 2.237042  | -0.054274 |
| C | -1.206186 | 3.749784  | -0.553079 |
| H | -1.286630 | 3.457855  | -1.612163 |
| H | -1.318031 | 4.844841  | -0.523857 |
| C | -2.340111 | 3.088347  | 0.253836  |
| H | -2.306747 | 3.466533  | 1.288291  |
| C | -3.749640 | 3.311205  | -0.317386 |
| H | -3.822186 | 2.836651  | -1.307877 |
| H | -3.896986 | 4.388936  | -0.489179 |
| H | -2.138241 | 2.008594  | 0.321010  |
| H | 0.248130  | 3.601503  | 1.048347  |
| C | 2.919565  | 1.904905  | -0.897256 |
| H | 2.399386  | 1.626576  | -1.808930 |
| C | 3.790121  | 1.000341  | -0.284645 |
| C | 4.534096  | 1.385350  | 0.834777  |
| H | 5.227934  | 0.684210  | 1.291001  |
| C | 4.349568  | 2.667408  | 1.360894  |
| H | 4.930551  | 2.978441  | 2.227200  |
| C | -5.644516 | -1.023760 | -0.148417 |
| C | -4.892162 | 2.816867  | 0.595651  |
| H | -4.787441 | 3.315138  | 1.572157  |
| H | -5.849980 | 3.167775  | 0.180275  |
| C | -4.369518 | -3.273563 | 0.014226  |
| H | -5.229990 | -3.724946 | 0.531569  |
| H | -4.535954 | -3.445702 | -1.061095 |
| C | -4.991358 | 1.294804  | 0.832670  |
| H | -5.704154 | 1.122686  | 1.654736  |
| H | -4.024935 | 0.911570  | 1.189599  |
| C | -3.075541 | -4.011007 | 0.439658  |
| H | -3.105282 | -5.039685 | 0.049543  |
| H | -3.039206 | -4.096331 | 1.537008  |
| C | -1.823573 | -3.273699 | -0.048586 |
| H | -1.798165 | -2.313689 | 0.477295  |
| H | -1.944223 | -3.031273 | -1.115907 |
| C | -4.351508 | -1.752448 | 0.259631  |
| H | -4.124068 | -1.551567 | 1.317673  |
| H | -3.525962 | -1.311919 | -0.315779 |
| C | -0.458527 | -3.948026 | 0.150289  |
| H | -6.028038 | -1.471135 | -1.078778 |
| C | -5.456993 | 0.488417  | -0.391092 |
| H | -6.410359 | 0.909871  | -0.747248 |
| H | -4.739818 | 0.620493  | -1.216190 |
| H | -0.379897 | -4.848680 | -0.477474 |
| H | -0.365061 | -4.302023 | 1.189109  |
| H | -6.425145 | -1.186735 | 0.611378  |

Sum of electronic and zero-point Energies= -1201.581975

Sum of electronic and thermal Energies= -1201.553654

Sum of electronic and thermal Enthalpies= -1201.552710

Sum of electronic and thermal Free Energies= -1201.640853

daec[n=8]-5-E1 (dmf)

|   |          |           |           |
|---|----------|-----------|-----------|
| C | 1.736218 | -2.985939 | -0.462161 |
| H | 1.520589 | -3.627187 | -1.315199 |
| C | 0.928055 | -3.027816 | 0.682807  |
| C | 1.257962 | -2.189026 | 1.759008  |
| H | 0.656851 | -2.214697 | 2.666390  |
| C | 2.336342 | -1.307645 | 1.675824  |
| H | 2.582744 | -0.647936 | 2.505129  |
| C | 3.103878 | -1.246168 | 0.511623  |
| O | 4.171296 | -0.363761 | 0.422891  |
| C | 2.817316 | -2.102416 | -0.565068 |
| O | 3.521074 | -2.045062 | -1.741101 |
| C | 4.869104 | -2.530284 | -1.672684 |
| H | 4.888405 | -3.585030 | -1.362286 |
| H | 5.478392 | -1.933789 | -0.983207 |

|   |           |           |           |
|---|-----------|-----------|-----------|
| H | 5.275830  | -2.444264 | -2.685417 |
| C | 3.481283  | 3.733290  | 0.060657  |
| H | 3.324759  | 4.807336  | -0.023415 |
| C | 2.454191  | 2.852398  | -0.304546 |
| C | 1.120138  | 3.359365  | -0.820319 |
| H | 0.936360  | 2.936660  | -1.820120 |
| H | 1.169903  | 4.449360  | -0.947652 |
| C | -0.074599 | 2.998329  | 0.086038  |
| H | -0.088050 | 1.909741  | 0.243331  |
| C | -1.427800 | 3.435003  | -0.493376 |
| H | -1.514141 | 3.056022  | -1.524281 |
| H | -1.462845 | 4.533374  | -0.567932 |
| C | -2.626140 | 2.928910  | 0.323810  |
| H | -2.567057 | 3.322430  | 1.351413  |
| C | -3.984666 | 3.302199  | -0.289014 |
| H | -4.013697 | 2.956333  | -1.333125 |
| H | -4.065690 | 4.399271  | -0.336416 |
| H | -2.546998 | 1.835429  | 0.412241  |
| H | 0.070986  | 3.450212  | 1.079005  |
| C | 2.675547  | 1.469713  | -0.188045 |
| H | 1.893869  | 0.772780  | -0.478192 |
| C | 3.893655  | 0.985609  | 0.294993  |
| C | 4.921675  | 1.867677  | 0.649962  |
| H | 5.863978  | 1.469964  | 1.019067  |
| C | 4.706148  | 3.240076  | 0.526518  |
| H | 5.499417  | 3.932210  | 0.803392  |
| C | -5.484252 | -1.035292 | -0.685789 |
| C | -5.210174 | 2.758264  | 0.472479  |
| H | -5.208979 | 3.177685  | 1.490789  |
| H | -6.120821 | 3.143310  | -0.012826 |
| C | -4.062904 | -3.161415 | -0.368384 |
| H | -4.989545 | -3.680998 | -0.078557 |
| H | -3.956978 | -3.311214 | -1.454677 |
| C | -5.311220 | 1.223386  | 0.576679  |
| H | -6.184401 | 0.972910  | 1.199639  |
| H | -4.437431 | 0.838481  | 1.119782  |
| C | -2.877015 | -3.828727 | 0.354939  |
| H | -2.818333 | -4.883573 | 0.045005  |
| H | -3.071779 | -3.838678 | 1.439160  |
| C | -1.526603 | -3.143444 | 0.103505  |
| H | -1.554360 | -2.123990 | 0.511090  |
| H | -1.355686 | -3.035619 | -0.978908 |
| C | -4.210467 | -1.657499 | -0.088261 |
| H | -4.185461 | -1.486980 | 0.998622  |
| H | -3.338045 | -1.128021 | -0.498829 |
| C | -0.322693 | -3.880844 | 0.731049  |
| H | -5.633124 | -1.433430 | -1.701753 |
| C | -5.442367 | 0.501671  | -0.773874 |
| H | -6.351885 | 0.859208  | -1.282107 |
| H | -4.601262 | 0.781782  | -1.425615 |
| H | -0.160767 | -4.833126 | 0.206968  |
| H | -0.555733 | -4.125578 | 1.776896  |
| H | -6.361651 | -1.356053 | -0.101948 |

Sum of electronic and zero-point Energies= -1201.603253

Sum of electronic and thermal Energies= -1201.573958

Sum of electronic and thermal Enthalpies= -1201.573013

Sum of electronic and thermal Free Energies= -1201.665492

daec[n=8]-5-E2 (dmf)

|   |          |           |           |
|---|----------|-----------|-----------|
| C | 1.227383 | -2.540974 | 0.961442  |
| H | 0.729221 | -2.578089 | 1.928804  |
| C | 0.714660 | -3.259148 | -0.130068 |
| C | 1.406209 | -3.196140 | -1.348347 |
| H | 1.040679 | -3.755880 | -2.207665 |
| C | 2.545822 | -2.396645 | -1.485326 |
| H | 3.069262 | -2.325931 | -2.436327 |
| C | 3.018298 | -1.657602 | -0.401789 |
| O | 4.150252 | -0.871052 | -0.549973 |
| C | 2.370725 | -1.748760 | 0.844859  |
| O | 2.800036 | -1.023041 | 1.927797  |

|   |           |           |           |
|---|-----------|-----------|-----------|
| C | 4.015857  | -1.495106 | 2.525631  |
| H | 4.850173  | -1.479978 | 1.813622  |
| H | 3.886483  | -2.515372 | 2.914529  |
| H | 4.232980  | -0.815394 | 3.355541  |
| C | 3.853265  | 3.286676  | -0.382637 |
| H | 3.800470  | 4.372996  | -0.334138 |
| C | 2.706540  | 2.550532  | -0.711637 |
| C | 1.382463  | 3.231799  | -1.004182 |
| H | 1.043795  | 2.944145  | -2.011493 |
| H | 1.529778  | 4.320217  | -1.024239 |
| C | 0.267825  | 2.878520  | 0.001801  |
| H | 0.163311  | 1.784576  | 0.049545  |
| C | -1.092317 | 3.492923  | -0.358618 |
| H | -1.334195 | 3.237983  | -1.402841 |
| H | -1.026154 | 4.591719  | -0.320157 |
| C | -2.232647 | 3.006592  | 0.548662  |
| H | -2.018049 | 3.282326  | 1.593743  |
| C | -3.610081 | 3.556522  | 0.147897  |
| H | -3.794104 | 3.324522  | -0.911829 |
| H | -3.588605 | 4.655496  | 0.212697  |
| H | -2.250146 | 1.907113  | 0.522405  |
| H | 0.570039  | 3.202017  | 1.009464  |
| C | 2.796179  | 1.149941  | -0.769761 |
| H | 1.920201  | 0.563763  | -1.035001 |
| C | 4.001900  | 0.504611  | -0.486993 |
| C | 5.148936  | 1.241970  | -0.170753 |
| H | 6.081561  | 0.721686  | 0.034171  |
| C | 5.064134  | 2.633688  | -0.122745 |
| H | 5.950665  | 3.214395  | 0.126132  |
| C | -5.577324 | -0.566810 | -0.461080 |
| C | -4.785442 | 3.043420  | 1.003966  |
| H | -4.622905 | 3.351547  | 2.048709  |
| H | -5.704419 | 3.554680  | 0.676616  |
| C | -4.353080 | -2.833190 | -0.533103 |
| H | -5.286570 | -3.294495 | -0.174780 |
| H | -4.394916 | -2.876493 | -1.633153 |
| C | -5.024639 | 1.520653  | 0.975215  |
| H | -5.835921 | 1.281798  | 1.680933  |
| H | -4.133635 | 1.005997  | 1.359804  |
| C | -3.163803 | -3.677726 | -0.035648 |
| H | -3.251837 | -4.694895 | -0.447726 |
| H | -3.226844 | -3.784503 | 1.058966  |
| C | -1.790072 | -3.094378 | -0.394897 |
| H | -1.664699 | -2.124917 | 0.105705  |
| H | -1.739419 | -2.889639 | -1.475646 |
| C | -4.310390 | -1.359963 | -0.097203 |
| H | -4.135242 | -1.307897 | 0.987972  |
| H | -3.445240 | -0.870298 | -0.568160 |
| C | -0.601030 | -3.998142 | 0.000916  |
| H | -5.888281 | -0.839838 | -1.481690 |
| C | -5.390743 | 0.960998  | -0.408554 |
| H | -6.314206 | 1.449717  | -0.757416 |
| H | -4.610744 | 1.233333  | -1.135296 |
| H | -0.598897 | -4.900024 | -0.626975 |
| H | -0.732402 | -4.330562 | 1.040309  |
| H | -6.405266 | -0.868661 | 0.199976  |

Sum of electronic and zero-point Energies= -1201.603769

Sum of electronic and thermal Energies= -1201.574570

Sum of electronic and thermal Enthalpies= -1201.573625

Sum of electronic and thermal Free Energies= -1201.664839

daec[n=8]-6-TS (dmf)

|   |           |          |           |
|---|-----------|----------|-----------|
| C | 0.403926  | 3.398632 | 0.366918  |
| H | 0.759909  | 4.276342 | 0.904287  |
| C | 1.311628  | 2.435655 | -0.101476 |
| C | 0.782903  | 1.337661 | -0.793499 |
| H | 1.433659  | 0.567566 | -1.195576 |
| C | -0.590257 | 1.192563 | -0.985285 |
| H | -0.958197 | 0.330698 | -1.529564 |
| C | -1.485688 | 2.130287 | -0.471535 |

|   |           |           |           |
|---|-----------|-----------|-----------|
| O | -2.862676 | 2.004383  | -0.617951 |
| C | -0.979746 | 3.258758  | 0.202068  |
| O | -1.809231 | 4.196455  | 0.765761  |
| C | -2.516832 | 5.025568  | -0.165063 |
| H | -1.815367 | 5.584346  | -0.801715 |
| H | -3.098820 | 5.731943  | 0.435952  |
| H | -3.195272 | 4.437449  | -0.794487 |
| C | -4.622229 | -1.494348 | 0.842999  |
| H | -5.076325 | -2.398012 | 1.245483  |
| C | -3.923232 | -1.546077 | -0.374722 |
| C | -3.733213 | -2.842108 | -1.143165 |
| H | -3.092478 | -2.641729 | -2.011612 |
| H | -4.700711 | -3.175240 | -1.549341 |
| C | -3.145550 | -4.011270 | -0.318916 |
| H | -3.005878 | -4.862003 | -1.002942 |
| C | -1.831757 | -3.742976 | 0.437203  |
| H | -1.610510 | -4.639749 | 1.036732  |
| H | -1.989166 | -2.931718 | 1.163625  |
| C | -0.590545 | -3.415147 | -0.411770 |
| H | -0.470305 | -4.173397 | -1.202123 |
| C | 0.679801  | -3.371183 | 0.455006  |
| H | 0.800714  | -4.352988 | 0.940606  |
| H | 0.527431  | -2.650208 | 1.274206  |
| H | -0.725282 | -2.451039 | -0.925081 |
| H | -3.896788 | -4.337040 | 0.415114  |
| C | -3.369758 | -0.358614 | -0.873747 |
| H | -2.872517 | -0.366714 | -1.839400 |
| C | -3.445685 | 0.829543  | -0.141199 |
| C | -4.135041 | 0.875447  | 1.070990  |
| H | -4.186220 | 1.809779  | 1.624250  |
| C | -4.735961 | -0.293533 | 1.549286  |
| H | -5.282517 | -0.268932 | 2.490272  |
| C | 4.919081  | -1.406114 | -0.289374 |
| C | 1.989368  | -3.021162 | -0.272868 |
| H | 2.119992  | -3.684479 | -1.142980 |
| H | 1.927705  | -1.996937 | -0.671636 |
| C | 5.471195  | 0.918627  | 0.782038  |
| H | 5.227309  | 1.502177  | 1.682199  |
| H | 6.556396  | 0.738837  | 0.831469  |
| C | 3.203423  | -3.164184 | 0.662193  |
| H | 3.215520  | -4.198283 | 1.040598  |
| H | 3.050661  | -2.529313 | 1.547831  |
| C | 5.195224  | 1.777005  | -0.471361 |
| H | 5.723699  | 1.339293  | -1.331228 |
| H | 5.647927  | 2.768399  | -0.314861 |
| C | 3.719275  | 1.931804  | -0.872679 |
| H | 3.658804  | 2.530968  | -1.793480 |
| H | 3.346235  | 0.937568  | -1.139682 |
| C | 4.738107  | -0.434742 | 0.891268  |
| H | 5.097047  | -0.925010 | 1.810102  |
| H | 3.665582  | -0.256364 | 1.052806  |
| C | 2.800808  | 2.556266  | 0.192463  |
| H | 4.312101  | -1.074753 | -1.143945 |
| C | 4.590052  | -2.874268 | 0.054759  |
| H | 5.346460  | -3.228005 | 0.772929  |
| H | 4.722596  | -3.489703 | -0.849022 |
| H | 2.992029  | 2.073436  | 1.162986  |
| H | 3.059174  | 3.615315  | 0.334774  |
| H | 5.964875  | -1.371745 | -0.633224 |

Sum of electronic and zero-point Energies= -1201.586852  
Sum of electronic and thermal Energies= -1201.558708  
Sum of electronic and thermal Enthalpies= -1201.557764  
Sum of electronic and thermal Free Energies= -1201.645550

daec[n=8]-6-E1 (dmf)

|   |          |          |           |
|---|----------|----------|-----------|
| C | 0.107875 | 3.346807 | -0.149925 |
| H | 0.451040 | 4.170968 | -0.773178 |
| C | 1.026494 | 2.557229 | 0.554552  |
| C | 0.526331 | 1.517177 | 1.353866  |
| H | 1.214544 | 0.897741 | 1.926708  |

|   |           |           |           |
|---|-----------|-----------|-----------|
| C | -0.843719 | 1.266502  | 1.432946  |
| H | -1.223580 | 0.464544  | 2.062086  |
| C | -1.745256 | 2.046585  | 0.703587  |
| O | -3.112542 | 1.864511  | 0.811076  |
| C | -1.269374 | 3.107560  | -0.087085 |
| O | -2.120743 | 3.953296  | -0.753799 |
| C | -2.771195 | 3.391457  | -1.900199 |
| H | -2.033218 | 3.041051  | -2.636402 |
| H | -3.364910 | 4.199053  | -2.340573 |
| H | -3.436266 | 2.562637  | -1.628632 |
| C | -4.914994 | -1.826049 | 0.098136  |
| H | -5.417612 | -2.773518 | -0.089106 |
| C | -3.697555 | -1.544877 | -0.544965 |
| C | -3.072831 | -2.550083 | -1.494487 |
| H | -2.270321 | -2.063405 | -2.063474 |
| H | -3.829806 | -2.862037 | -2.228731 |
| C | -2.530411 | -3.824148 | -0.805689 |
| H | -2.250744 | -4.542817 | -1.590988 |
| C | -1.331166 | -3.621814 | 0.136339  |
| H | -1.160010 | -4.566613 | 0.675002  |
| H | -1.585267 | -2.877297 | 0.906432  |
| C | -0.022029 | -3.213236 | -0.558107 |
| H | 0.184840  | -3.917410 | -1.380164 |
| C | 1.179739  | -3.189015 | 0.398366  |
| H | 1.290632  | -4.183825 | 0.859046  |
| H | 0.971188  | -2.493000 | 1.226804  |
| H | -0.134269 | -2.223121 | -1.025050 |
| H | -3.350907 | -4.291937 | -0.242209 |
| C | -3.074323 | -0.313325 | -0.299466 |
| H | -2.140388 | -0.073640 | -0.801223 |
| C | -3.652898 | 0.612275  | 0.578643  |
| C | -4.863563 | 0.329291  | 1.216128  |
| H | -5.298505 | 1.063977  | 1.889373  |
| C | -5.489752 | -0.894496 | 0.965985  |
| H | -6.435407 | -1.119778 | 1.455854  |
| C | 5.234976  | -1.060018 | -0.440785 |
| C | 2.505371  | -2.793660 | -0.269868 |
| H | 2.697692  | -3.463256 | -1.123883 |
| H | 2.407308  | -1.782019 | -0.691768 |
| C | 5.442051  | 1.444191  | 0.203061  |
| H | 5.346083  | 2.111446  | 1.072389  |
| H | 6.502539  | 1.486927  | -0.090516 |
| C | 3.700753  | -2.851006 | 0.694156  |
| H | 3.764291  | -3.868542 | 1.110373  |
| H | 3.506322  | -2.190440 | 1.552512  |
| C | 4.602026  | 1.999276  | -0.964809 |
| H | 4.858559  | 1.455166  | -1.885520 |
| H | 4.900270  | 3.044433  | -1.141232 |
| C | 3.076270  | 1.932324  | -0.785660 |
| H | 2.595252  | 2.280009  | -1.711903 |
| H | 2.763843  | 0.885916  | -0.659844 |
| C | 5.104790  | 0.010448  | 0.653922  |
| H | 5.774003  | -0.252794 | 1.488392  |
| H | 4.088087  | -0.009654 | 1.070802  |
| C | 2.518552  | 2.759034  | 0.394245  |
| H | 4.510755  | -0.863484 | -1.243912 |
| C | 5.065108  | -2.504851 | 0.067600  |
| H | 5.850082  | -2.707113 | 0.813281  |
| H | 5.255644  | -3.196915 | -0.767755 |
| H | 3.024832  | 2.466398  | 1.323374  |
| H | 2.742283  | 3.822474  | 0.228584  |
| H | 6.229768  | -0.974054 | -0.906098 |

Sum of electronic and zero-point Energies= -1201.601179  
Sum of electronic and thermal Energies= -1201.572131  
Sum of electronic and thermal Enthalpies= -1201.571187  
Sum of electronic and thermal Free Energies= -1201.662721

daec[n=8]-6-E2 (dmf)

|   |          |          |          |
|---|----------|----------|----------|
| C | 0.591726 | 1.912539 | 0.794264 |
| H | 1.239727 | 1.419975 | 1.517319 |

|   |           |           |           |
|---|-----------|-----------|-----------|
| C | 1.140372  | 2.664176  | -0.256364 |
| C | 0.261903  | 3.295090  | -1.149009 |
| H | 0.659759  | 3.894807  | -1.965922 |
| C | -1.121972 | 3.151917  | -1.013807 |
| H | -1.805774 | 3.631382  | -1.710916 |
| C | -1.650353 | 2.382552  | 0.022140  |
| O | -3.025550 | 2.294841  | 0.164952  |
| C | -0.788456 | 1.765979  | 0.947971  |
| O | -1.273835 | 0.977639  | 1.962105  |
| C | -1.888349 | 1.695654  | 3.042098  |
| H | -1.161690 | 2.362343  | 3.528084  |
| H | -2.225016 | 0.940755  | 3.759482  |
| H | -2.749276 | 2.282780  | 2.699252  |
| C | -5.110150 | -1.233352 | -0.598815 |
| H | -5.682307 | -2.138126 | -0.797746 |
| C | -3.773785 | -1.148597 | -1.022379 |
| C | -3.115630 | -2.317480 | -1.730375 |
| H | -2.215196 | -1.970565 | -2.253613 |
| H | -3.799925 | -2.696378 | -2.502931 |
| C | -2.757925 | -3.496693 | -0.794012 |
| H | -2.461476 | -4.352825 | -1.419045 |
| C | -1.648156 | -3.221627 | 0.235737  |
| H | -1.630657 | -4.057886 | 0.951567  |
| H | -1.899756 | -2.325678 | 0.823368  |
| C | -0.241918 | -3.063473 | -0.363465 |
| H | -0.014479 | -3.946053 | -0.983001 |
| C | 0.853742  | -2.898984 | 0.700284  |
| H | 0.822974  | -3.760820 | 1.386237  |
| H | 0.632181  | -2.012236 | 1.315692  |
| H | -0.216009 | -2.198979 | -1.043871 |
| H | -3.670302 | -3.806361 | -0.263656 |
| C | -3.056627 | 0.030256  | -0.769835 |
| H | -2.026510 | 0.115196  | -1.105311 |
| C | -3.661638 | 1.094743  | -0.092393 |
| C | -4.992625 | 1.007680  | 0.327647  |
| H | -5.446920 | 1.850315  | 0.843407  |
| C | -5.710397 | -0.161287 | 0.066832  |
| H | -6.748562 | -0.232430 | 0.386615  |
| C | 5.137803  | -1.330995 | -0.196211 |
| C | 2.268079  | -2.769310 | 0.115043  |
| H | 2.478947  | -3.642449 | -0.523695 |
| H | 2.300805  | -1.892141 | -0.548568 |
| C | 5.473936  | 1.240341  | -0.220982 |
| H | 5.412738  | 2.113822  | 0.444855  |
| H | 6.537733  | 1.143264  | -0.488546 |
| C | 3.360151  | -2.657454 | 1.190016  |
| H | 3.292675  | -3.535662 | 1.850967  |
| H | 3.151703  | -1.786836 | 1.829935  |
| C | 4.680737  | 1.524567  | -1.512919 |
| H | 4.910427  | 0.748705  | -2.257689 |
| H | 5.045087  | 2.470372  | -1.943141 |
| C | 3.151967  | 1.594697  | -1.358950 |
| H | 2.700232  | 1.718866  | -2.354229 |
| H | 2.774216  | 0.636411  | -0.975228 |
| C | 5.040280  | -0.005363 | 0.574218  |
| H | 5.668586  | -0.073829 | 1.476397  |
| H | 4.012982  | 0.136180  | 0.937986  |
| C | 2.641417  | 2.730102  | -0.444508 |
| H | 4.486914  | -1.298647 | -1.081126 |
| C | 4.800090  | -2.575833 | 0.647089  |
| H | 5.496959  | -2.622724 | 1.498744  |
| H | 4.999479  | -3.474778 | 0.042819  |
| H | 3.131751  | 2.664750  | 0.535374  |
| H | 2.924278  | 3.699042  | -0.879945 |
| H | 6.163455  | -1.442473 | -0.582284 |

Sum of electronic and zero-point Energies= -1201.602680  
Sum of electronic and thermal Energies= -1201.573756  
Sum of electronic and thermal Enthalpies= -1201.572812  
Sum of electronic and thermal Free Energies= -1201.663322

daec[n=8]-7-TS (dmf)

|   |           |           |           |
|---|-----------|-----------|-----------|
| C | 0.407125  | 3.365551  | -0.526514 |
| H | 0.834013  | 4.350966  | -0.691241 |
| C | 1.268648  | 2.287267  | -0.258228 |
| C | 0.697263  | 1.029262  | -0.049417 |
| H | 1.325389  | 0.163268  | 0.143870  |
| C | -0.686734 | 0.851999  | -0.072526 |
| H | -1.096761 | -0.132420 | 0.120574  |
| C | -1.539096 | 1.923014  | -0.328659 |
| O | -2.920518 | 1.817254  | -0.366531 |
| C | -0.985831 | 3.201372  | -0.574050 |
| O | -1.875803 | 4.199374  | -0.827710 |
| C | -1.362600 | 5.503819  | -1.081505 |
| H | -0.809959 | 5.896780  | -0.216452 |
| H | -0.710258 | 5.516516  | -1.966020 |
| H | -2.236340 | 6.135122  | -1.268279 |
| C | -4.525394 | -1.387756 | 1.749666  |
| H | -4.909400 | -2.226320 | 2.329327  |
| C | -3.956001 | -1.631166 | 0.484882  |
| C | -3.833042 | -3.072320 | 0.012028  |
| H | -4.840097 | -3.516770 | 0.010710  |
| H | -3.285859 | -3.624066 | 0.791264  |
| C | -3.193923 | -3.380968 | -1.355404 |
| H | -3.314571 | -4.464550 | -1.501296 |
| C | -1.706374 | -3.031095 | -1.590757 |
| H | -1.595791 | -1.964110 | -1.825696 |
| H | -1.396639 | -3.560384 | -2.505484 |
| C | -0.708042 | -3.368247 | -0.469405 |
| H | -0.863260 | -4.397749 | -0.110247 |
| C | 0.743116  | -3.206063 | -0.959162 |
| H | 0.817546  | -2.278505 | -1.548949 |
| H | 0.967525  | -4.023594 | -1.662828 |
| H | -0.886461 | -2.710974 | 0.395312  |
| H | -3.788201 | -2.907986 | -2.151760 |
| C | -3.485928 | -0.533141 | -0.245732 |
| H | -3.065443 | -0.659826 | -1.237395 |
| C | -3.489747 | 0.748131  | 0.319200  |
| C | -4.052416 | 0.983681  | 1.571325  |
| H | -4.051227 | 1.989383  | 1.984431  |
| C | -4.593944 | -0.098081 | 2.275715  |
| H | -5.044811 | 0.066970  | 3.252559  |
| C | 4.655277  | -1.515387 | 0.913407  |
| C | 1.827816  | -3.166576 | 0.131011  |
| H | 1.710044  | -2.246328 | 0.723798  |
| H | 1.691373  | -4.003300 | 0.834527  |
| C | 5.504123  | 0.805337  | 0.030723  |
| H | 6.556953  | 0.614430  | 0.290941  |
| H | 5.532032  | 1.377181  | -0.908865 |
| C | 3.240064  | -3.239569 | -0.477745 |
| H | 3.367534  | -4.241695 | -0.915339 |
| H | 3.301426  | -2.540885 | -1.325245 |
| C | 4.899913  | 1.689939  | 1.142507  |
| H | 5.398399  | 2.670994  | 1.103929  |
| H | 5.157162  | 1.263494  | 2.123682  |
| C | 3.374265  | 1.878015  | 1.113628  |
| H | 2.908155  | 0.906610  | 1.315473  |
| H | 3.080041  | 2.526640  | 1.952412  |
| C | 4.814210  | -0.541564 | -0.268992 |
| H | 3.828876  | -0.351678 | -0.716772 |
| H | 5.404092  | -1.038251 | -1.055837 |
| C | 2.778270  | 2.455015  | -0.189540 |
| H | 5.567201  | -1.493231 | 1.530589  |
| C | 4.419490  | -2.979621 | 0.480785  |
| H | 4.302406  | -3.604982 | 1.379836  |
| H | 5.337671  | -3.332765 | -0.014143 |
| H | 3.043370  | 3.516745  | -0.288443 |
| H | 3.230879  | 1.945226  | -1.052510 |
| H | 3.840505  | -1.178065 | 1.570037  |

Sum of electronic and zero-point Energies= -1201.585971  
Sum of electronic and thermal Energies= -1201.558114

Sum of electronic and thermal Enthalpies= -1201.557170  
Sum of electronic and thermal Free Energies= -1201.643954

daec[n=8]-7-E1 (dmf)

|   |           |           |           |
|---|-----------|-----------|-----------|
| C | 0.554807  | 2.021909  | -0.898115 |
| H | 1.232789  | 1.579891  | -1.622875 |
| C | 1.091945  | 2.731391  | 0.190744  |
| C | 0.218279  | 3.318173  | 1.113588  |
| H | 0.614297  | 3.881740  | 1.956367  |
| C | -1.166000 | 3.173633  | 0.966751  |
| H | -1.855597 | 3.620548  | 1.679758  |
| C | -1.689064 | 2.453297  | -0.101209 |
| O | -3.062321 | 2.375651  | -0.268564 |
| C | -0.828104 | 1.878467  | -1.061544 |
| O | -1.428611 | 1.218963  | -2.085241 |
| C | -0.598396 | 0.636295  | -3.088575 |
| H | 0.010064  | 1.396834  | -3.596814 |
| H | 0.058693  | -0.137313 | -2.667919 |
| H | -1.282159 | 0.178124  | -3.808708 |
| C | -5.181107 | -1.121482 | 0.538041  |
| H | -5.763465 | -2.016542 | 0.750974  |
| C | -3.847820 | -1.039558 | 0.971333  |
| C | -3.211125 | -2.194501 | 1.721534  |
| H | -3.909615 | -2.539250 | 2.497407  |
| H | -2.313341 | -1.841771 | 2.245485  |
| C | -2.855922 | -3.409456 | 0.831374  |
| H | -2.596102 | -4.252063 | 1.490149  |
| C | -1.711437 | -3.192512 | -0.173782 |
| H | -1.928246 | -2.313532 | -0.800175 |
| H | -1.689928 | -4.054195 | -0.858691 |
| C | -0.320325 | -3.038771 | 0.461529  |
| H | -0.135574 | -3.892044 | 1.133988  |
| C | 0.811470  | -2.959497 | -0.573602 |
| H | 0.619530  | -2.116441 | -1.257137 |
| H | 0.793763  | -3.866750 | -1.198631 |
| H | -0.292266 | -2.139766 | 1.095515  |
| H | -3.760201 | -3.715585 | 0.285324  |
| C | -3.117898 | 0.127393  | 0.699166  |
| H | -2.090235 | 0.211306  | 1.042770  |
| C | -3.708854 | 1.187457  | 0.001323  |
| C | -5.037884 | 1.102046  | -0.427029 |
| H | -5.480643 | 1.938920  | -0.961896 |
| C | -5.766462 | -0.056770 | -0.152841 |
| H | -6.802529 | -0.125557 | -0.480122 |
| C | 5.065949  | -1.334124 | 0.346500  |
| C | 2.207967  | -2.797378 | 0.045108  |
| H | 2.223734  | -1.881314 | 0.654589  |
| H | 2.397446  | -3.630153 | 0.741744  |
| C | 5.408895  | 1.232450  | 0.222081  |
| H | 6.472132  | 1.149282  | 0.496480  |
| H | 5.349626  | 2.067417  | -0.491666 |
| C | 3.330384  | -2.751252 | -1.003197 |
| H | 3.282735  | -3.669743 | -1.608786 |
| H | 3.138902  | -1.923455 | -1.702542 |
| C | 4.614284  | 1.587950  | 1.495165  |
| H | 4.987999  | 2.548991  | 1.881439  |
| H | 4.832675  | 0.845992  | 2.276908  |
| C | 3.087157  | 1.669191  | 1.331171  |
| H | 2.701056  | 0.705103  | 0.970865  |
| H | 2.631892  | 1.824145  | 2.320374  |
| C | 4.976417  | -0.056415 | -0.502273 |
| H | 3.951907  | 0.065647  | -0.881008 |
| H | 5.610928  | -0.179004 | -1.394327 |
| C | 2.593250  | 2.786992  | 0.385976  |
| H | 6.084075  | -1.415073 | 0.759203  |
| C | 4.754386  | -2.629946 | -0.427154 |
| H | 4.939928  | -3.488849 | 0.236820  |
| H | 5.474283  | -2.726214 | -1.255164 |
| H | 2.883537  | 3.762285  | 0.802432  |
| H | 3.089812  | 2.695753  | -0.588705 |

H 4.396810 -1.254169 1.214629  
Sum of electronic and zero-point Energies= -1201.606082  
Sum of electronic and thermal Energies= -1201.577366  
Sum of electronic and thermal Enthalpies= -1201.576421  
Sum of electronic and thermal Free Energies= -1201.666337

daec[n=8]-7-E2 (dmf)

|   |           |           |           |
|---|-----------|-----------|-----------|
| C | -0.029162 | 2.977916  | 0.317380  |
| H | 0.235796  | 3.578357  | 1.183224  |
| C | 0.994488  | 2.510160  | -0.526262 |
| C | 0.652235  | 1.748711  | -1.649618 |
| H | 1.430630  | 1.387913  | -2.319251 |
| C | -0.686555 | 1.439392  | -1.913905 |
| H | -0.964694 | 0.846488  | -2.782706 |
| C | -1.690690 | 1.887727  | -1.064512 |
| O | -3.017436 | 1.621841  | -1.365525 |
| C | -1.372926 | 2.675864  | 0.063178  |
| O | -2.421785 | 3.078963  | 0.825129  |
| C | -2.145849 | 3.866777  | 1.982092  |
| H | -1.515576 | 3.322005  | 2.698346  |
| H | -1.660352 | 4.815530  | 1.715242  |
| H | -3.118016 | 4.073166  | 2.438629  |
| C | -5.041984 | -1.606148 | 0.323168  |
| H | -5.596073 | -2.440068 | 0.751193  |
| C | -3.691325 | -1.423986 | 0.658624  |
| C | -2.991927 | -2.396468 | 1.588883  |
| H | -3.686163 | -2.678014 | 2.392927  |
| H | -2.140861 | -1.898241 | 2.071200  |
| C | -2.512815 | -3.697205 | 0.898494  |
| H | -2.212733 | -4.408946 | 1.682653  |
| C | -1.353067 | -3.539475 | -0.100514 |
| H | -1.612845 | -2.781582 | -0.855199 |
| H | -1.242542 | -4.487159 | -0.649783 |
| C | -0.001214 | -3.185154 | 0.538964  |
| H | 0.237769  | -3.934769 | 1.310582  |
| C | 1.151470  | -3.118740 | -0.474036 |
| H | 0.916592  | -2.364633 | -1.242287 |
| H | 1.223688  | -4.081783 | -1.004579 |
| H | -0.073004 | -2.220754 | 1.064116  |
| H | -3.371825 | -4.152213 | 0.383798  |
| C | -2.995807 | -0.336756 | 0.106168  |
| H | -1.951651 | -0.181492 | 0.363257  |
| C | -3.639744 | 0.546697  | -0.767941 |
| C | -4.987213 | 0.361138  | -1.098998 |
| H | -5.470153 | 1.060973  | -1.776880 |
| C | -5.679729 | -0.717779 | -0.548252 |
| H | -6.729239 | -0.862195 | -0.799186 |
| C | 5.239724  | -1.085729 | 0.400756  |
| C | 2.510454  | -2.786537 | 0.160450  |
| H | 2.434767  | -1.817987 | 0.677113  |
| H | 2.739706  | -3.530675 | 0.940500  |
| C | 5.388015  | 1.477971  | 0.043550  |
| H | 6.426787  | 1.512295  | 0.407476  |
| H | 5.326794  | 2.232113  | -0.754906 |
| C | 3.662234  | -2.751370 | -0.855966 |
| H | 3.704228  | -3.722915 | -1.372682 |
| H | 3.435181  | -2.009086 | -1.635932 |
| C | 4.460377  | 1.885928  | 1.206656  |
| H | 4.715709  | 2.912546  | 1.512155  |
| H | 4.673969  | 1.251994  | 2.079440  |
| C | 2.952008  | 1.802980  | 0.917557  |
| H | 2.686584  | 0.774761  | 0.634253  |
| H | 2.399978  | 2.010682  | 1.845888  |
| C | 5.118062  | 0.093814  | -0.576353 |
| H | 4.120649  | 0.091740  | -1.037748 |
| H | 5.829133  | -0.057977 | -1.403803 |
| C | 2.447062  | 2.765901  | -0.180098 |
| H | 6.236525  | -1.056230 | 0.868651  |
| C | 5.051799  | -2.468996 | -0.252122 |
| H | 5.272619  | -3.244626 | 0.497971  |

H 5.807736 -2.589785 -1.044036  
H 2.581812 3.802171 0.162781  
H 3.055250 2.648956 -1.086021  
H 4.520062 -0.966777 1.222728  
Sum of electronic and zero-point Energies= -1201.605717  
Sum of electronic and thermal Energies= -1201.576990  
Sum of electronic and thermal Enthalpies= -1201.576045  
Sum of electronic and thermal Free Energies= -1201.666363

jugcathanin-1-TS (dmf)

C 1.300427 2.727002 -0.143885  
O 1.719651 3.991430 -0.426464  
H 0.946636 4.570609 -0.296955  
C 2.180136 1.635287 -0.284737  
C 1.629124 0.415792 0.045883  
H 2.247463 -0.446273 0.005051  
C 0.332553 0.210495 0.424662  
H 0.055177 -0.805979 0.589051  
C -0.562066 1.262133 0.554073  
O -1.889612 1.037945 0.945722  
C -0.054782 2.547515 0.277388  
O -0.813206 3.701508 0.311066  
C -1.333849 4.059500 1.604219  
H -1.822863 5.030308 1.476970  
H -2.066392 3.320574 1.947780  
H -0.523780 4.148557 2.341082  
C -2.447220 -2.859689 -0.345987  
H -2.448133 -3.835321 -0.830611  
C -1.586696 -2.618852 0.734453  
C -0.397520 -3.534105 1.033530  
H -0.722635 -4.581727 1.044417  
H 0.015276 -3.314243 2.025527  
C 0.756280 -3.400855 -0.033563  
H 0.374750 -2.958801 -0.962077  
H 1.094598 -4.409658 -0.319520  
C 2.050936 -2.658898 0.370218  
C 3.016158 -2.267403 -0.784538  
H 2.418429 -2.022854 -1.671648  
H 3.524926 -3.211621 -1.036889  
C 4.107680 -1.159611 -0.518740  
H 4.136452 -0.937021 0.556127  
C 4.027204 0.172383 -1.374915  
H 3.366818 -0.005452 -2.236026  
C 3.629067 1.558241 -0.745258  
H 4.306937 1.783805 0.094029  
H 3.834635 2.326337 -1.503421  
H 5.027005 0.330820 -1.799747  
H 5.079140 -1.616207 -0.741828  
O 2.332660 -2.452778 1.535960  
C -1.673798 -1.351304 1.338361  
H -1.055025 -1.128854 2.203980  
C -2.301511 -0.283465 0.687546  
C -3.155729 -0.529336 -0.404989  
O -3.762715 0.546781 -0.966507  
C -4.592971 0.325156 -2.105436  
H -4.025374 -0.112574 -2.938163  
H -4.963437 1.311815 -2.397882  
H -5.444850 -0.324674 -1.861932  
C -3.275626 -1.854228 -0.860795  
H -3.936761 -2.085203 -1.690465  
Sum of electronic and zero-point Energies= -1190.270240  
Sum of electronic and thermal Energies= -1190.246838  
Sum of electronic and thermal Enthalpies= -1190.245894  
Sum of electronic and thermal Free Energies= -1190.321771

jugcathanin-1-E1 (dmf)

C -1.742472 1.904246 0.407508  
O -2.252524 2.252326 1.621181  
H -1.489142 2.411766 2.204971  
C -2.610652 1.545868 -0.638090

C -2.036408 1.248318 -1.881211  
H -2.691684 1.002842 -2.714753  
C -0.651393 1.197453 -2.066693  
H -0.219365 0.904801 -3.020344  
C 0.190106 1.442244 -0.983031  
O 1.557472 1.233648 -1.095905  
C -0.346737 1.849036 0.245839  
O 0.397957 2.096143 1.375506  
C 1.376424 3.151392 1.278405  
H 1.733055 3.322157 2.298663  
H 2.211591 2.851722 0.637831  
H 0.916820 4.070215 0.890756  
C 3.015328 -2.353459 0.457594  
H 3.423574 -3.269049 0.882558  
C 1.669013 -2.297095 0.089870  
C 0.743508 -3.489307 0.265984  
H 1.285951 -4.275157 0.805253  
H 0.473363 -3.911038 -0.712898  
C -0.569650 -3.178702 1.019423  
H -0.390971 -2.512831 1.872535  
H -0.969558 -4.115367 1.440437  
C -1.700209 -2.628081 0.145367  
C -2.605867 -1.594047 0.794004  
H -1.958717 -0.723970 0.983740  
H -2.881556 -1.955176 1.796962  
C -3.850962 -1.189432 -0.010125  
H -3.587875 -1.135852 -1.073994  
C -4.477838 0.149266 0.454002  
H -4.209396 0.339061 1.501534  
C -4.096507 1.389560 -0.401353  
H -4.591794 1.307982 -1.378118  
H -4.506381 2.283515 0.089183  
H -5.573456 0.070917 0.430025  
H -4.594429 -1.993800 0.073065  
O -1.852106 -3.007557 -1.003694  
C 1.190834 -1.089516 -0.447865  
H 0.157327 -1.012649 -0.766893  
C 2.011996 0.025110 -0.587284  
C 3.375877 -0.042747 -0.224812  
O 4.106069 1.092828 -0.402497  
C 5.483279 1.058792 -0.035479  
H 5.609924 0.848028 1.035661  
H 5.874450 2.055883 -0.257127  
H 6.037107 0.312440 -0.621869  
C 3.862789 -1.246796 0.293578  
H 4.903470 -1.328167 0.592285  
Sum of electronic and zero-point Energies= -1190.340650  
Sum of electronic and thermal Energies= -1190.316464  
Sum of electronic and thermal Enthalpies= -1190.315520  
Sum of electronic and thermal Free Energies= -1190.393949

jugcathanin-1-E2 (dmf)

C -2.139357 1.852628 -0.316820  
O -2.992714 2.142305 -1.337611  
H -2.438146 2.464762 -2.071083  
C -2.636246 1.378407 0.906750  
C -1.708630 1.159310 1.936799  
H -2.071173 0.832717 2.910118  
C -0.336168 1.290118 1.732272  
H 0.374511 1.061707 2.522726  
C 0.144767 1.660302 0.471995  
O 1.509042 1.654847 0.220257  
C -0.753490 1.999348 -0.543657  
O -0.400350 2.497752 -1.779302  
C 0.276632 1.603641 -2.684161  
H 0.292538 2.115981 -3.651082  
H 1.303435 1.412600 -2.357284  
H -0.268618 0.656041 -2.780957  
C 3.324456 -2.092178 -0.066692  
H 3.827300 -3.056077 -0.126995

|                                                           |           |           |           |
|-----------------------------------------------------------|-----------|-----------|-----------|
| C                                                         | 1.949392  | -2.008703 | -0.300972 |
| C                                                         | 1.126422  | -3.233459 | -0.666742 |
| H                                                         | 1.746976  | -4.125733 | -0.520032 |
| H                                                         | 0.866445  | -3.207639 | -1.735054 |
| C                                                         | -0.186492 | -3.402130 | 0.128742  |
| H                                                         | -0.036726 | -3.188295 | 1.194166  |
| H                                                         | -0.502700 | -4.456265 | 0.070694  |
| C                                                         | -1.379430 | -2.604104 | -0.407393 |
| C                                                         | -2.352513 | -2.084072 | 0.636941  |
| H                                                         | -1.767444 | -1.393822 | 1.263026  |
| H                                                         | -2.608149 | -2.917113 | 1.310747  |
| C                                                         | -3.619376 | -1.394784 | 0.106358  |
| H                                                         | -3.359107 | -0.782901 | -0.766158 |
| C                                                         | -4.333743 | -0.528001 | 1.177328  |
| H                                                         | -4.029630 | -0.864240 | 2.178891  |
| C                                                         | -4.096042 | 1.003633  | 1.062133  |
| H                                                         | -4.657303 | 1.387422  | 0.203429  |
| H                                                         | -4.517340 | 1.485597  | 1.956215  |
| H                                                         | -5.418986 | -0.690857 | 1.124911  |
| H                                                         | -4.307619 | -2.165232 | -0.266403 |
| O                                                         | -1.526406 | -2.409135 | -1.602568 |
| C                                                         | 1.351376  | -0.741621 | -0.201374 |
| H                                                         | 0.289190  | -0.630635 | -0.386726 |
| C                                                         | 2.085378  | 0.394849  | 0.127959  |
| C                                                         | 3.477783  | 0.305736  | 0.348968  |
| O                                                         | 4.118790  | 1.465680  | 0.653508  |
| C                                                         | 5.524596  | 1.405402  | 0.879945  |
| H                                                         | 5.768018  | 0.762773  | 1.737790  |
| H                                                         | 5.834807  | 2.431546  | 1.097711  |
| H                                                         | 6.061034  | 1.044607  | -0.008877 |
| C                                                         | 4.081372  | -0.952678 | 0.245713  |
| H                                                         | 5.147678  | -1.058392 | 0.421414  |
| Sum of electronic and zero-point Energies= -1190.336297   |           |           |           |
| Sum of electronic and thermal Energies= -1190.312051      |           |           |           |
| Sum of electronic and thermal Enthalpies= -1190.311106    |           |           |           |
| Sum of electronic and thermal Free Energies= -1190.389968 |           |           |           |

jugcathanin-2-TS (dmf)

|   |           |           |           |
|---|-----------|-----------|-----------|
| C | -1.049271 | 2.847427  | -0.175626 |
| O | -1.332883 | 4.168941  | -0.009010 |
| H | -0.523324 | 4.654322  | -0.251731 |
| C | -2.032130 | 1.868703  | 0.072330  |
| C | -1.612720 | 0.573787  | -0.146662 |
| H | -2.315179 | -0.212270 | -0.020974 |
| C | -0.354153 | 0.203188  | -0.527744 |
| H | -0.184839 | -0.846725 | -0.607953 |
| C | 0.631839  | 1.143613  | -0.784631 |
| O | 1.910264  | 0.752817  | -1.208521 |
| C | 0.268671  | 2.492889  | -0.603901 |
| O | 1.117722  | 3.555829  | -0.843621 |
| C | 2.250136  | 3.639862  | 0.045033  |
| H | 2.811774  | 4.527333  | -0.263123 |
| H | 1.917694  | 3.758450  | 1.085793  |
| H | 2.881058  | 2.748936  | -0.041162 |
| C | 2.143662  | -3.038995 | 0.443814  |
| H | 2.070424  | -3.959666 | 1.021449  |
| C | 1.268582  | -2.817752 | -0.629179 |
| C | -0.013660 | -3.634584 | -0.802074 |
| H | 0.208114  | -4.705179 | -0.712835 |
| H | -0.437990 | -3.475112 | -1.800705 |
| C | -1.110957 | -3.280989 | 0.274490  |
| H | -0.656125 | -2.789673 | 1.143393  |
| H | -1.535327 | -4.217386 | 0.670521  |
| C | -2.341172 | -2.456629 | -0.169226 |
| C | -3.226220 | -1.864780 | 0.964224  |
| H | -2.579722 | -1.597184 | 1.809453  |
| H | -3.814242 | -2.726401 | 1.318989  |
| C | -4.215248 | -0.685886 | 0.616235  |
| H | -4.257494 | -0.565423 | -0.474385 |
| C | -3.981181 | 0.707991  | 1.334410  |

|                                                           |           |           |           |
|-----------------------------------------------------------|-----------|-----------|-----------|
| H                                                         | -4.948353 | 1.005258  | 1.760339  |
| C                                                         | -3.468959 | 1.980231  | 0.563047  |
| H                                                         | -3.579425 | 2.834855  | 1.244459  |
| H                                                         | -4.144179 | 2.188546  | -0.282808 |
| H                                                         | -3.316624 | 0.549574  | 2.196124  |
| H                                                         | -5.217995 | -1.021705 | 0.905625  |
| O                                                         | -2.640421 | -2.334377 | -1.342330 |
| C                                                         | 1.452780  | -1.628385 | -1.357306 |
| H                                                         | 0.823940  | -1.427584 | -2.220940 |
| C                                                         | 2.205593  | -0.571559 | -0.833630 |
| C                                                         | 3.073157  | -0.795932 | 0.252417  |
| O                                                         | 3.801791  | 0.265237  | 0.687229  |
| C                                                         | 4.633147  | 0.082147  | 1.832762  |
| H                                                         | 5.101126  | 1.053240  | 2.016844  |
| H                                                         | 5.414206  | -0.667571 | 1.646354  |
| H                                                         | 4.044657  | -0.212685 | 2.712439  |
| C                                                         | 3.083814  | -2.076136 | 0.833440  |
| H                                                         | 3.751781  | -2.292802 | 1.661524  |
| Sum of electronic and zero-point Energies= -1190.270924   |           |           |           |
| Sum of electronic and thermal Energies= -1190.247629      |           |           |           |
| Sum of electronic and thermal Enthalpies= -1190.246685    |           |           |           |
| Sum of electronic and thermal Free Energies= -1190.322011 |           |           |           |

jugcathanin-2-E1 (dmf)

|   |           |           |           |
|---|-----------|-----------|-----------|
| C | -1.821016 | 1.720376  | -0.541946 |
| O | -2.372261 | 1.817163  | -1.784286 |
| H | -1.627701 | 1.850865  | -2.411663 |
| C | -2.643037 | 1.580959  | 0.588738  |
| C | -2.016739 | 1.538953  | 1.842904  |
| H | -2.635486 | 1.467703  | 2.736012  |
| C | -0.625519 | 1.514739  | 1.975640  |
| H | -0.151616 | 1.414473  | 2.948886  |
| C | 0.170981  | 1.550197  | 0.830263  |
| O | 1.543249  | 1.379567  | 0.930742  |
| C | -0.419084 | 1.715019  | -0.428022 |
| O | 0.281925  | 1.749802  | -1.611523 |
| C | 1.223685  | 2.831759  | -1.758032 |
| H | 1.580230  | 2.780025  | -2.791027 |
| H | 0.731603  | 3.798196  | -1.585557 |
| H | 2.065796  | 2.714565  | -1.068377 |
| C | 3.098186  | -2.306326 | -0.250344 |
| H | 3.537663  | -3.253742 | -0.559198 |
| C | 1.719011  | -2.215586 | -0.032354 |
| C | 0.813650  | -3.417601 | -0.264297 |
| H | 1.328450  | -4.318477 | 0.094628  |
| H | 0.672621  | -3.560968 | -1.345559 |
| C | -0.580420 | -3.351132 | 0.382654  |
| H | -0.526553 | -3.021005 | 1.427733  |
| H | -1.002448 | -4.368543 | 0.410550  |
| C | -1.613061 | -2.516181 | -0.381920 |
| C | -2.672278 | -1.830160 | 0.466926  |
| H | -2.131798 | -1.122076 | 1.112842  |
| H | -3.082772 | -2.577528 | 1.164448  |
| C | -3.796865 | -1.118843 | -0.301241 |
| H | -3.375723 | -0.618755 | -1.181371 |
| C | -4.583886 | -0.103302 | 0.566043  |
| H | -5.649720 | -0.140505 | 0.301218  |
| C | -4.136015 | 1.379458  | 0.435585  |
| H | -4.670422 | 1.967450  | 1.194820  |
| H | -4.453479 | 1.759108  | -0.542131 |
| H | -4.525981 | -0.404258 | 1.622322  |
| H | -4.486997 | -1.879400 | -0.691239 |
| O | -1.583989 | -2.430754 | -1.597489 |
| C | 1.208081  | -0.974495 | 0.373727  |
| H | 0.149314  | -0.861750 | 0.570516  |
| C | 2.026586  | 0.142080  | 0.530593  |
| C | 3.414797  | 0.045954  | 0.302324  |
| O | 4.138262  | 1.186812  | 0.476072  |
| C | 5.542901  | 1.121892  | 0.243193  |
| H | 5.922201  | 2.130668  | 0.430447  |

|   |          |           |           |
|---|----------|-----------|-----------|
| H | 5.767162 | 0.836300  | -0.794145 |
| H | 6.032828 | 0.416801  | 0.929241  |
| C | 3.935741 | -1.195418 | -0.083519 |
| H | 5.001145 | -1.303914 | -0.263022 |

Sum of electronic and zero-point Energies= -1190.339450  
Sum of electronic and thermal Energies= -1190.315390  
Sum of electronic and thermal Enthalpies= -1190.314446  
Sum of electronic and thermal Free Energies= -1190.392141

jugcathanin-2-E2 (dmf)

|   |           |           |           |
|---|-----------|-----------|-----------|
| C | -2.093328 | 1.952548  | 0.192876  |
| O | -2.878739 | 2.430787  | 1.197109  |
| H | -2.274471 | 2.805203  | 1.863150  |
| C | -2.684051 | 1.302143  | -0.900444 |
| C | -1.837758 | 0.876296  | -1.934522 |
| H | -2.276210 | 0.408466  | -2.813702 |
| C | -0.452417 | 0.992703  | -1.841782 |
| H | 0.196909  | 0.607957  | -2.624192 |
| C | 0.125184  | 1.545857  | -0.695683 |
| O | 1.504798  | 1.529681  | -0.541639 |
| C | -0.691239 | 2.077771  | 0.311348  |
| O | -0.276668 | 2.751942  | 1.434135  |
| C | 0.779895  | 2.199771  | 2.240047  |
| H | 0.709585  | 2.708281  | 3.206537  |
| H | 0.641270  | 1.121193  | 2.384334  |
| H | 1.758704  | 2.395522  | 1.792327  |
| C | 3.304511  | -2.147940 | 0.274989  |
| H | 3.808437  | -3.089352 | 0.488944  |
| C | 1.908580  | -2.077713 | 0.316193  |
| C | 1.063404  | -3.305686 | 0.622979  |
| H | 1.623171  | -3.952106 | 1.310872  |
| H | 0.919592  | -3.892852 | -0.296153 |
| C | -0.329995 | -3.026804 | 1.218927  |
| H | -0.288553 | -2.254158 | 1.996934  |
| H | -0.687987 | -3.940507 | 1.719911  |
| C | -1.420722 | -2.689759 | 0.196450  |
| C | -2.500933 | -1.724500 | 0.663729  |
| H | -1.988475 | -0.765171 | 0.834159  |
| H | -2.832699 | -2.039941 | 1.665218  |
| C | -3.697754 | -1.544926 | -0.283012 |
| H | -3.338866 | -1.551739 | -1.319865 |
| C | -4.519888 | -0.260176 | -0.012581 |
| H | -5.586510 | -0.468129 | -0.175522 |
| C | -4.156507 | 0.958632  | -0.905749 |
| H | -4.756334 | 1.817768  | -0.576766 |
| H | -4.456165 | 0.735209  | -1.938544 |
| H | -4.423820 | 0.026319  | 1.043715  |
| H | -4.350119 | -2.423734 | -0.188123 |
| O | -1.416260 | -3.183443 | -0.917973 |
| C | 1.314538  | -0.837572 | 0.038826  |
| H | 0.237616  | -0.738381 | 0.069282  |
| C | 2.069614  | 0.288629  | -0.281949 |
| C | 3.478425  | 0.211738  | -0.318113 |
| O | 4.140478  | 1.361565  | -0.619826 |
| C | 5.564162  | 1.314178  | -0.661645 |
| H | 5.887783  | 2.326863  | -0.919318 |
| H | 5.922446  | 0.612460  | -1.428085 |
| H | 5.987298  | 1.034718  | 0.313539  |
| C | 4.079174  | -1.021268 | -0.036034 |
| H | 5.161158  | -1.111687 | -0.052218 |

Sum of electronic and zero-point Energies= -1190.337666  
Sum of electronic and thermal Energies= -1190.313559  
Sum of electronic and thermal Enthalpies= -1190.312615  
Sum of electronic and thermal Free Energies= -1190.391019

jugcathanin-3-TS (dmf)

|   |           |          |           |
|---|-----------|----------|-----------|
| C | 0.283144  | 2.927269 | -0.144518 |
| O | 0.255048  | 4.262931 | -0.407635 |
| H | -0.676624 | 4.538747 | -0.334941 |
| C | 1.490790  | 2.206649 | -0.242744 |

|   |           |           |           |
|---|-----------|-----------|-----------|
| C | 1.380049  | 0.864959  | 0.054555  |
| H | 2.256197  | 0.265949  | 0.024104  |
| C | 0.220675  | 0.220244  | 0.384330  |
| H | 0.303912  | -0.829393 | 0.553968  |
| C | -0.983647 | 0.900139  | 0.467295  |
| O | -2.171715 | 0.230574  | 0.795321  |
| C | -0.943281 | 2.283064  | 0.205995  |
| O | -2.065783 | 3.090408  | 0.197343  |
| C | -2.671608 | 3.299574  | 1.487808  |
| H | -3.066256 | 2.359764  | 1.890218  |
| H | -1.947505 | 3.729357  | 2.193342  |
| H | -3.492949 | 4.004866  | 1.327992  |
| C | -1.244984 | -3.539907 | -0.656854 |
| H | -0.860646 | -4.423463 | -1.164921 |
| C | -0.615606 | -3.076332 | 0.513605  |
| C | 0.792976  | -3.536258 | 0.895466  |
| H | 0.851468  | -4.631466 | 0.871736  |
| H | 1.034029  | -3.222377 | 1.918161  |
| C | 1.897624  | -2.973855 | -0.078965 |
| H | 1.447792  | -2.637471 | -1.021289 |
| H | 2.573198  | -3.794707 | -0.367725 |
| C | 2.834644  | -1.858464 | 0.436907  |
| C | 3.713254  | -1.142922 | -0.628124 |
| H | 3.172292  | -1.133457 | -1.582704 |
| H | 4.554633  | -1.836887 | -0.784112 |
| C | 4.293893  | 0.286357  | -0.297387 |
| H | 4.143862  | 0.493887  | 0.770334  |
| C | 3.801555  | 1.499664  | -1.190728 |
| H | 4.703839  | 2.003688  | -1.560619 |
| C | 2.897172  | 2.651263  | -0.618090 |
| H | 2.861432  | 3.442024  | -1.380103 |
| H | 3.395171  | 3.105543  | 0.253901  |
| H | 3.303326  | 1.096489  | -2.084202 |
| H | 5.380573  | 0.221705  | -0.426704 |
| O | 2.930245  | -1.597199 | 1.621459  |
| C | -1.193992 | -1.962947 | 1.139687  |
| H | -0.758535 | -1.580548 | 2.059751  |
| C | -2.113951 | -1.140632 | 0.464272  |
| C | -2.741600 | -1.611080 | -0.700944 |
| O | -3.657089 | -0.934021 | -1.443284 |
| C | -4.506364 | 0.034763  | -0.813523 |
| H | -5.358788 | 0.159158  | -1.489399 |
| H | -3.996945 | 0.994363  | -0.680968 |
| H | -4.864203 | -0.327789 | 0.158983  |
| C | -2.333628 | -2.862710 | -1.203247 |
| H | -2.827617 | -3.232547 | -2.099197 |

Sum of electronic and zero-point Energies= -1190.268694  
Sum of electronic and thermal Energies= -1190.245251  
Sum of electronic and thermal Enthalpies= -1190.244307  
Sum of electronic and thermal Free Energies= -1190.320019

jugcathanin-3-E1 (dmf)

|   |           |           |           |
|---|-----------|-----------|-----------|
| C | 1.707520  | 1.892241  | -0.456446 |
| O | 2.287434  | 2.200006  | -1.649196 |
| H | 1.560342  | 2.329768  | -2.284376 |
| C | 2.514024  | 1.587477  | 0.653386  |
| C | 1.869157  | 1.330791  | 1.870937  |
| H | 2.475717  | 1.127719  | 2.751379  |
| C | 0.476388  | 1.268123  | 1.974288  |
| H | -0.010172 | 1.008468  | 2.911054  |
| C | -0.298858 | 1.458783  | 0.832291  |
| O | -1.670026 | 1.234722  | 0.870139  |
| C | 0.304683  | 1.823079  | -0.378338 |
| O | -0.369556 | 2.013231  | -1.560925 |
| C | -1.395978 | 3.026780  | -1.567034 |
| H | -2.282949 | 2.689450  | -1.021824 |
| H | -1.019053 | 3.960823  | -1.130132 |
| H | -1.647112 | 3.189402  | -2.619551 |
| C | -2.994370 | -2.431786 | -0.633117 |
| H | -3.359091 | -3.368191 | -1.051518 |



|   |           |           |           |
|---|-----------|-----------|-----------|
| C | -1.671967 | -2.337735 | -0.180861 |
| C | -0.723184 | -3.522287 | -0.261016 |
| H | -1.222335 | -4.332987 | -0.804780 |
| H | -0.509884 | -3.905513 | 0.747120  |
| C | 0.629320  | -3.217622 | -0.943480 |
| H | 0.494950  | -2.582387 | -1.827427 |
| H | 1.063812  | -4.162067 | -1.308872 |
| C | 1.698566  | -2.623425 | -0.021783 |
| C | 2.631829  | -1.602638 | -0.651371 |
| H | 1.988251  | -0.748548 | -0.912483 |
| H | 2.972576  | -1.996174 | -1.621567 |
| C | 3.820731  | -1.152401 | 0.211305  |
| H | 3.492351  | -1.061219 | 1.254304  |
| C | 4.460821  | 0.175304  | -0.266230 |
| H | 5.553554  | 0.112749  | -0.171131 |
| C | 4.013386  | 1.443249  | 0.513272  |
| H | 4.441561  | 2.322607  | 0.012198  |
| H | 4.449164  | 1.407899  | 1.520664  |
| H | 4.256238  | 0.320020  | -1.335139 |
| H | 4.576087  | -1.949912 | 0.204981  |
| O | 1.782504  | -2.959738 | 1.147496  |
| C | -1.238766 | -1.110051 | 0.343324  |
| H | -0.226343 | -1.010337 | 0.718264  |
| C | -2.082911 | 0.000311  | 0.391664  |
| C | -3.415563 | -0.105974 | -0.049808 |
| O | -4.255307 | 0.982602  | -0.065126 |
| C | -4.738469 | 1.389994  | 1.222564  |
| H | -5.403894 | 2.241016  | 1.045084  |
| H | -3.918209 | 1.700520  | 1.881361  |
| H | -5.305578 | 0.578169  | 1.700438  |
| C | -3.855974 | -1.331630 | -0.552138 |
| H | -4.882683 | -1.401364 | -0.905602 |

Sum of electronic and zero-point Energies= -1190.337851

Sum of electronic and thermal Energies= -1190.313422

Sum of electronic and thermal Enthalpies= -1190.312477

Sum of electronic and thermal Free Energies= -1190.391726

#### jugcathanin-3-E2 (dmf)

|   |           |           |           |
|---|-----------|-----------|-----------|
| C | 1.991371  | 1.901209  | 0.301926  |
| O | 2.773760  | 2.264515  | 1.355184  |
| H | 2.168660  | 2.599332  | 2.041552  |
| C | 2.575419  | 1.406965  | -0.874744 |
| C | 1.717645  | 1.113033  | -1.945540 |
| H | 2.148045  | 0.768850  | -2.884475 |
| C | 0.331281  | 1.192771  | -1.823154 |
| H | -0.323563 | 0.908592  | -2.643095 |
| C | -0.232780 | 1.584815  | -0.605526 |
| O | -1.610152 | 1.530629  | -0.430815 |
| C | 0.590312  | 1.995018  | 0.446472  |
| O | 0.140896  | 2.518082  | 1.639956  |
| C | -0.489753 | 1.605476  | 2.560443  |
| H | -1.479358 | 1.302960  | 2.203573  |
| H | 0.135009  | 0.718269  | 2.725232  |
| H | -0.595886 | 2.156834  | 3.499807  |
| C | -3.285300 | -2.284714 | -0.090575 |
| H | -3.742791 | -3.270372 | -0.025471 |
| C | -1.927453 | -2.123639 | 0.215530  |
| C | -1.072733 | -3.299028 | 0.662133  |
| H | -1.646853 | -4.221742 | 0.516378  |
| H | -0.869439 | -3.225037 | 1.740256  |
| C | 0.284257  | -3.434327 | -0.062068 |
| H | 0.180287  | -3.258009 | -1.139696 |
| H | 0.639570  | -4.472094 | 0.044007  |
| C | 1.414760  | -2.571459 | 0.507733  |
| C | 2.424087  | -2.050456 | -0.500904 |
| H | 1.848488  | -1.406625 | -1.182751 |
| H | 2.748301  | -2.895429 | -1.128698 |
| C | 3.631974  | -1.292511 | 0.071905  |
| H | 3.301025  | -0.666214 | 0.909549  |
| C | 4.366327  | -0.428851 | -0.987733 |

|   |           |           |           |
|---|-----------|-----------|-----------|
| H | 5.452981  | -0.540388 | -0.870742 |
| C | 4.056362  | 1.093310  | -0.937608 |
| H | 4.505258  | 1.565502  | -1.823382 |
| H | 4.551794  | 1.528987  | -0.063310 |
| H | 4.133336  | -0.810030 | -1.992204 |
| H | 4.330246  | -2.021537 | 0.504480  |
| O | 1.486582  | -2.328201 | 1.700891  |
| C | -1.378083 | -0.837963 | 0.106381  |
| H | -0.332418 | -0.677533 | 0.342161  |
| C | -2.143526 | 0.255685  | -0.305029 |
| C | -3.512686 | 0.090484  | -0.590199 |
| O | -4.290316 | 1.126762  | -1.043204 |
| C | -4.601575 | 2.129732  | -0.067284 |
| H | -5.257266 | 2.849862  | -0.567634 |
| H | -3.699526 | 2.644313  | 0.285654  |
| H | -5.132630 | 1.690233  | 0.789637  |
| C | -4.064880 | -1.187568 | -0.473208 |
| H | -5.119591 | -1.310907 | -0.710633 |

Sum of electronic and zero-point Energies= -1190.333276

Sum of electronic and thermal Energies= -1190.308829

Sum of electronic and thermal Enthalpies= -1190.307884

Sum of electronic and thermal Free Energies= -1190.387266

#### jugcathanin-4-TS (dmf)

|   |           |           |           |
|---|-----------|-----------|-----------|
| C | -1.165117 | 2.769539  | 0.207667  |
| O | -1.557194 | 4.044083  | 0.483172  |
| H | -0.776444 | 4.608350  | 0.335354  |
| C | -2.078722 | 1.702858  | 0.339408  |
| C | -1.550351 | 0.467993  | 0.028754  |
| H | -2.181169 | -0.388341 | 0.041002  |
| C | -0.246868 | 0.231528  | -0.301254 |
| H | 0.011254  | -0.793944 | -0.419908 |
| C | 0.668132  | 1.258269  | -0.465901 |
| O | 1.981453  | 0.992091  | -0.880998 |
| C | 0.185456  | 2.559165  | -0.215163 |
| O | 0.962753  | 3.699448  | -0.279393 |
| C | 1.470123  | 4.024060  | -1.586756 |
| H | 2.179860  | 3.262744  | -1.929513 |
| H | 0.650280  | 4.119224  | -2.311960 |
| H | 1.983140  | 4.985312  | -1.484007 |
| C | 2.294998  | -2.978171 | 0.246481  |
| H | 2.226487  | -3.964073 | 0.704785  |
| C | 1.427797  | -2.632954 | -0.799537 |
| C | 0.136650  | -3.409887 | -1.074897 |
| H | 0.342379  | -4.486509 | -1.118386 |
| H | -0.275323 | -3.120978 | -2.049124 |
| C | -0.978204 | -3.175325 | 0.021392  |
| H | -0.592503 | -2.597273 | 0.873342  |
| H | -1.266060 | -4.142432 | 0.460478  |
| C | -2.305812 | -2.522075 | -0.426362 |
| C | -3.428869 | -2.320597 | 0.639620  |
| H | -3.270271 | -3.068410 | 1.427993  |
| H | -4.352199 | -2.595978 | 0.112514  |
| C | -3.702888 | -0.956653 | 1.392795  |
| H | -4.476455 | -1.216641 | 2.127171  |
| C | -4.219028 | 0.286036  | 0.570412  |
| H | -4.181595 | 0.061691  | -0.504299 |
| C | -3.529600 | 1.675580  | 0.803776  |
| H | -4.125830 | 2.439003  | 0.283498  |
| H | -3.584931 | 1.937313  | 1.872629  |
| H | -5.282784 | 0.423156  | 0.803107  |
| H | -2.821383 | -0.691332 | 1.988096  |
| O | -2.522113 | -2.261808 | -1.596848 |
| C | 1.607278  | -1.358041 | -1.370193 |
| H | 0.972581  | -1.053829 | -2.198806 |
| C | 2.326730  | -0.363130 | -0.698815 |
| C | 3.186298  | -0.712451 | 0.360780  |
| O | 3.883489  | 0.294526  | 0.945043  |
| C | 4.711870  | -0.026017 | 2.061686  |
| H | 5.510197  | -0.727455 | 1.782491  |

|   |          |           |          |
|---|----------|-----------|----------|
| H | 4.125802 | -0.449384 | 2.888986 |
| H | 5.157979 | 0.920464  | 2.380179 |
| C | 3.216766 | -2.059236 | 0.765985 |
| H | 3.880063 | -2.370325 | 1.567296 |

Sum of electronic and zero-point Energies= -1190.263110  
Sum of electronic and thermal Energies= -1190.239944  
Sum of electronic and thermal Enthalpies= -1190.239000  
Sum of electronic and thermal Free Energies= -1190.313958

jugcathanin-4-E1 (dmf)

|   |           |           |           |
|---|-----------|-----------|-----------|
| C | -1.935570 | 2.095313  | -0.183467 |
| O | -2.790755 | 2.483022  | -1.168740 |
| H | -2.234597 | 2.825111  | -1.892090 |
| C | -2.442820 | 1.533587  | 0.999435  |
| C | -1.523227 | 1.217785  | 2.009704  |
| H | -1.894749 | 0.834622  | 2.958129  |
| C | -0.147652 | 1.307009  | 1.800923  |
| H | 0.558091  | 0.979769  | 2.560407  |
| C | 0.338414  | 1.729785  | 0.561523  |
| O | 1.690449  | 1.600536  | 0.275023  |
| C | -0.548213 | 2.200837  | -0.413697 |
| O | -0.190371 | 2.771117  | -1.615780 |
| C | 0.523461  | 1.955021  | -2.564763 |
| H | 1.558884  | 1.796480  | -2.248542 |
| H | 0.021771  | 0.989842  | -2.708515 |
| H | 0.511286  | 2.515676  | -3.504537 |
| C | 3.031771  | -2.323771 | -0.211754 |
| H | 3.411950  | -3.338165 | -0.322027 |
| C | 1.679210  | -2.058023 | -0.443009 |
| C | 0.718876  | -3.151112 | -0.882159 |
| H | 1.257761  | -4.105993 | -0.861279 |
| H | 0.427319  | -2.982109 | -1.928860 |
| C | -0.575699 | -3.304177 | -0.053654 |
| H | -0.418338 | -3.046696 | 1.004837  |
| H | -0.882804 | -4.361733 | -0.040535 |
| C | -1.796477 | -2.534798 | -0.551186 |
| C | -3.080546 | -2.708557 | 0.258334  |
| H | -2.986642 | -3.588565 | 0.905999  |
| H | -3.904525 | -2.894771 | -0.444247 |
| C | -3.399799 | -1.464481 | 1.129922  |
| H | -4.069568 | -1.777169 | 1.942962  |
| C | -4.044024 | -0.292602 | 0.365058  |
| H | -3.605218 | -0.220731 | -0.637664 |
| C | -3.884419 | 1.084135  | 1.070950  |
| H | -4.544599 | 1.811657  | 0.583474  |
| H | -4.203119 | 1.004250  | 2.119400  |
| H | -5.114331 | -0.502871 | 0.223067  |
| H | -2.471184 | -1.136352 | 1.614308  |
| O | -1.761920 | -1.827098 | -1.545664 |
| C | 1.239666  | -0.734051 | -0.280646 |
| H | 0.197809  | -0.497557 | -0.465463 |
| C | 2.108207  | 0.283836  | 0.109371  |
| C | 3.477064  | 0.011843  | 0.325887  |
| O | 4.255339  | 1.066144  | 0.690796  |
| C | 5.639476  | 0.817966  | 0.921804  |
| H | 6.138574  | 0.442259  | 0.017531  |
| H | 5.789811  | 0.103770  | 1.743678  |
| H | 6.072485  | 1.783640  | 1.198644  |
| C | 3.921681  | -1.304648 | 0.159201  |
| H | 4.965718  | -1.549524 | 0.329587  |

Sum of electronic and zero-point Energies= -1190.335075  
Sum of electronic and thermal Energies= -1190.311009  
Sum of electronic and thermal Enthalpies= -1190.310065  
Sum of electronic and thermal Free Energies= -1190.388033

jugcathanin-4-E2 (dmf)

|   |           |          |           |
|---|-----------|----------|-----------|
| C | -1.511468 | 2.077304 | 0.435884  |
| O | -2.006052 | 2.373532 | 1.670577  |
| H | -1.236321 | 2.444394 | 2.263358  |
| C | -2.383889 | 1.822469 | -0.633942 |

|   |           |           |           |
|---|-----------|-----------|-----------|
| C | -1.814975 | 1.597826  | -1.896373 |
| H | -2.475695 | 1.438861  | -2.747083 |
| C | -0.435446 | 1.474907  | -2.074175 |
| H | -0.009971 | 1.215432  | -3.040377 |
| C | 0.402677  | 1.572302  | -0.963203 |
| O | 1.738020  | 1.207705  | -1.059681 |
| C | -0.118931 | 1.946645  | 0.279943  |
| O | 0.622768  | 2.060290  | 1.432474  |
| C | 1.709967  | 3.006577  | 1.405643  |
| H | 2.526160  | 2.645935  | 0.772044  |
| H | 1.361841  | 3.984866  | 1.048651  |
| H | 2.054045  | 3.095357  | 2.440541  |
| C | 2.673601  | -2.596707 | 0.378521  |
| H | 2.949844  | -3.574881 | 0.769075  |
| C | 1.355645  | -2.351005 | -0.014385 |
| C | 0.289950  | -3.430859 | 0.070593  |
| H | 0.741288  | -4.320714 | 0.525391  |
| H | -0.020351 | -3.721506 | -0.943264 |
| C | -0.984385 | -3.066598 | 0.863797  |
| H | -0.773261 | -2.354462 | 1.675668  |
| H | -1.375611 | -3.961976 | 1.372476  |
| C | -2.154743 | -2.524598 | 0.047822  |
| C | -3.406637 | -2.142289 | 0.834863  |
| H | -3.355039 | -2.582240 | 1.838082  |
| H | -4.278545 | -2.572863 | 0.323363  |
| C | -3.570877 | -0.603675 | 0.956468  |
| H | -4.219858 | -0.392366 | 1.817373  |
| C | -4.155162 | 0.071356  | -0.299347 |
| H | -3.753005 | -0.418883 | -1.195047 |
| C | -3.863056 | 1.593235  | -0.407202 |
| H | -4.436796 | 1.998659  | -1.251503 |
| H | -4.206444 | 2.109528  | 0.497131  |
| H | -5.243651 | -0.087690 | -0.317748 |
| H | -2.594624 | -0.169999 | 1.204953  |
| O | -2.105262 | -2.410428 | -1.166718 |
| C | 1.048416  | -1.071467 | -0.508968 |
| H | 0.037627  | -0.859777 | -0.840238 |
| C | 2.013706  | -0.070223 | -0.588975 |
| C | 3.347254  | -0.329610 | -0.201422 |
| O | 4.223755  | 0.706315  | -0.320119 |
| C | 5.574417  | 0.478094  | 0.074021  |
| H | 6.040147  | -0.315389 | -0.527007 |
| H | 5.645210  | 0.217458  | 1.139433  |
| H | 6.099261  | 1.421304  | -0.103078 |
| C | 3.661090  | -1.604672 | 0.279031  |
| H | 4.674992  | -1.832441 | 0.593975  |

Sum of electronic and zero-point Energies= -1190.338006  
Sum of electronic and thermal Energies= -1190.313944  
Sum of electronic and thermal Enthalpies= -1190.313000  
Sum of electronic and thermal Free Energies= -1190.390833

jugcathanin-5-TS (dmf)

|   |           |           |           |
|---|-----------|-----------|-----------|
| C | -1.496225 | 2.641912  | 0.228945  |
| O | -2.018715 | 3.866505  | 0.513552  |
| H | -1.294436 | 4.507261  | 0.392053  |
| C | -2.295101 | 1.483917  | 0.318615  |
| C | -1.636029 | 0.317765  | 0.002748  |
| H | -2.205240 | -0.577067 | -0.045604 |
| C | -0.302676 | 0.208052  | -0.273388 |
| H | 0.068306  | -0.786327 | -0.379333 |
| C | 0.497795  | 1.330731  | -0.417928 |
| O | 1.833510  | 1.220680  | -0.825356 |
| C | -0.124021 | 2.572247  | -0.169692 |
| O | 0.537302  | 3.785126  | -0.214928 |
| C | 0.981214  | 4.188842  | -1.523465 |
| H | 0.139583  | 4.222942  | -2.228974 |
| H | 1.403022  | 5.191953  | -1.406307 |
| H | 1.751848  | 3.507087  | -1.900800 |
| C | 2.663946  | -2.723920 | 0.133605  |
| H | 2.741939  | -3.729342 | 0.545662  |

|   |           |           |           |
|---|-----------|-----------|-----------|
| C | 1.722960  | -2.452038 | -0.870250 |
| C | 0.551346  | -3.397368 | -1.150913 |
| H | 0.918269  | -4.422201 | -1.286445 |
| H | 0.042926  | -3.114629 | -2.080834 |
| C | -0.508831 | -3.420608 | 0.022081  |
| H | -0.066408 | -3.034569 | 0.947668  |
| H | -0.758524 | -4.471239 | 0.239844  |
| C | -1.889677 | -2.752556 | -0.201226 |
| C | -2.633260 | -2.288670 | 1.075024  |
| H | -1.910373 | -1.761112 | 1.709725  |
| H | -2.849013 | -3.219754 | 1.627242  |
| C | -4.000880 | -1.515293 | 1.003239  |
| H | -4.725279 | -2.209316 | 0.554781  |
| C | -4.313292 | -0.135557 | 0.294459  |
| H | -4.147005 | -0.242895 | -0.785789 |
| C | -3.742214 | 1.261555  | 0.738392  |
| H | -3.836901 | 1.370554  | 1.830903  |
| H | -4.401475 | 2.029297  | 0.309036  |
| H | -5.402550 | -0.045965 | 0.411183  |
| H | -4.307969 | -1.414745 | 2.054515  |
| O | -2.378925 | -2.659317 | -1.312359 |
| C | 1.714554  | -1.142881 | -1.385736 |
| H | 1.023611  | -0.892273 | -2.186347 |
| C | 2.329300  | -0.091423 | -0.695792 |
| C | 3.262391  | -0.369142 | 0.321523  |
| O | 3.851057  | 0.694187  | 0.925001  |
| C | 4.752191  | 0.436915  | 2.001053  |
| H | 5.622295  | -0.145149 | 1.667251  |
| H | 5.086605  | 1.418947  | 2.347606  |
| H | 4.253534  | -0.090389 | 2.825983  |
| C | 3.476219  | -1.715589 | 0.667840  |
| H | 4.201131  | -1.969863 | 1.434883  |

Sum of electronic and zero-point Energies= -1190.262303

Sum of electronic and thermal Energies= -1190.239003

Sum of electronic and thermal Enthalpies= -1190.238059

Sum of electronic and thermal Free Energies= -1190.313745

#### jugcathanin-5-E1 (dmf)

|   |           |           |           |
|---|-----------|-----------|-----------|
| C | -1.903425 | 2.018530  | -0.161874 |
| O | -2.710971 | 2.477565  | -1.158339 |
| H | -2.122677 | 2.836086  | -1.846684 |
| C | -2.469553 | 1.367401  | 0.943508  |
| C | -1.606668 | 0.986541  | 1.981285  |
| H | -2.026241 | 0.535966  | 2.878782  |
| C | -0.224765 | 1.102513  | 1.853312  |
| H | 0.444639  | 0.725454  | 2.622657  |
| C | 0.330013  | 1.626156  | 0.681123  |
| O | 1.701119  | 1.512315  | 0.475613  |
| C | -0.504390 | 2.158559  | -0.309728 |
| O | -0.136974 | 2.823411  | -1.451654 |
| C | 1.023624  | 2.420880  | -2.198833 |
| H | 1.031453  | 1.336786  | -2.362321 |
| H | 0.938476  | 2.932979  | -3.161988 |
| H | 1.944233  | 2.731821  | -1.696553 |
| C | 3.036580  | -2.347108 | -0.401668 |
| H | 3.414152  | -3.348740 | -0.601192 |
| C | 1.676454  | -2.070148 | -0.555774 |
| C | 0.676991  | -3.127050 | -0.994299 |
| H | 1.195280  | -4.091037 | -1.062791 |
| H | 0.303069  | -2.899479 | -2.003028 |
| C | -0.546588 | -3.280736 | -0.063892 |
| H | -0.264840 | -3.172023 | 0.991416  |
| H | -0.945508 | -4.304401 | -0.157683 |
| C | -1.746861 | -2.378518 | -0.372377 |
| C | -2.696150 | -2.143074 | 0.792975  |
| H | -2.160633 | -1.486602 | 1.493633  |
| H | -2.791869 | -3.099913 | 1.328971  |
| C | -4.102890 | -1.604774 | 0.472205  |
| H | -4.559327 | -2.276171 | -0.270012 |
| C | -4.278266 | -0.160483 | -0.044466 |

|   |           |           |           |
|---|-----------|-----------|-----------|
| H | -3.715752 | -0.028060 | -0.974655 |
| C | -3.937150 | 1.000523  | 0.934228  |
| H | -4.255120 | 0.734034  | 1.951741  |
| H | -4.531028 | 1.874947  | 0.636279  |
| H | -5.340622 | -0.058150 | -0.310987 |
| H | -4.705018 | -1.717523 | 1.386438  |
| O | -1.934544 | -1.921012 | -1.487488 |
| C | 1.243127  | -0.763935 | -0.276837 |
| H | 0.196051  | -0.515808 | -0.403823 |
| C | 2.118933  | 0.223583  | 0.167353  |
| C | 3.496875  | -0.057451 | 0.304693  |
| O | 4.284908  | 0.969376  | 0.723194  |
| C | 5.678159  | 0.713472  | 0.879463  |
| H | 6.142562  | 0.414952  | -0.070952 |
| H | 6.117769  | 1.656843  | 1.216150  |
| H | 5.863209  | -0.063386 | 1.634665  |
| C | 3.937723  | -1.352873 | 0.011786  |
| H | 4.988807  | -1.603853 | 0.118217  |

Sum of electronic and zero-point Energies= -1190.334370

Sum of electronic and thermal Energies= -1190.310352

Sum of electronic and thermal Enthalpies= -1190.309408

Sum of electronic and thermal Free Energies= -1190.387189

#### jugcathanin-5-E2 (dmf)

|   |           |           |           |
|---|-----------|-----------|-----------|
| C | -1.586123 | 1.839643  | 0.501673  |
| O | -2.110211 | 1.976982  | 1.753378  |
| H | -1.351695 | 2.046301  | 2.360958  |
| C | -2.430382 | 1.641283  | -0.600698 |
| C | -1.831696 | 1.559138  | -1.867492 |
| H | -2.471042 | 1.451581  | -2.742140 |
| C | -0.445673 | 1.525504  | -2.031117 |
| H | 0.005624  | 1.372807  | -3.008336 |
| C | 0.372851  | 1.582096  | -0.903018 |
| O | 1.728046  | 1.298583  | -1.008816 |
| C | -0.186501 | 1.810982  | 0.358835  |
| O | 0.532195  | 1.864089  | 1.530013  |
| C | 1.564840  | 2.867033  | 1.605296  |
| H | 1.164337  | 3.854199  | 1.339272  |
| H | 1.897960  | 2.874742  | 2.647403  |
| H | 2.403569  | 2.615324  | 0.948698  |
| C | 2.806628  | -2.527902 | 0.267203  |
| H | 3.115074  | -3.507338 | 0.629461  |
| C | 1.471694  | -2.298051 | -0.072806 |
| C | 0.402551  | -3.367638 | 0.067973  |
| H | 0.859943  | -4.266246 | 0.499045  |
| H | 0.016206  | -3.653631 | -0.920741 |
| C | -0.802213 | -2.950281 | 0.940975  |
| H | -0.485495 | -2.341715 | 1.797953  |
| H | -1.264584 | -3.851885 | 1.375974  |
| C | -1.953008 | -2.251531 | 0.208851  |
| C | -2.868194 | -1.411707 | 1.087759  |
| H | -2.296125 | -0.523135 | 1.389829  |
| H | -3.011976 | -1.971637 | 2.024943  |
| C | -4.248810 | -1.031414 | 0.521734  |
| H | -4.759661 | -1.960292 | 0.228333  |
| C | -4.357446 | -0.054298 | -0.668334 |
| H | -3.817316 | -0.462546 | -1.530521 |
| C | -3.920537 | 1.420603  | -0.441074 |
| H | -4.256940 | 1.762521  | 0.544894  |
| H | -4.445553 | 2.037604  | -1.183740 |
| H | -5.420323 | -0.034692 | -0.951082 |
| H | -4.834455 | -0.619972 | 1.357494  |
| O | -2.136638 | -2.405597 | -0.987304 |
| C | 1.126808  | -1.016202 | -0.530889 |
| H | 0.102789  | -0.815474 | -0.823447 |
| C | 2.061952  | 0.011561  | -0.606559 |
| C | 3.412606  | -0.228230 | -0.269981 |
| O | 4.259776  | 0.832434  | -0.378479 |
| C | 5.626955  | 0.625151  | -0.032646 |
| H | 6.093876  | -0.133836 | -0.675812 |

|   |          |           |           |
|---|----------|-----------|-----------|
| H | 6.122803 | 1.587321  | -0.190265 |
| H | 5.736164 | 0.328216  | 1.019908  |
| C | 3.769254 | -1.511568 | 0.157689  |
| H | 4.798142 | -1.725169 | 0.431340  |

Sum of electronic and zero-point Energies= -1190.337635  
Sum of electronic and thermal Energies= -1190.313572  
Sum of electronic and thermal Enthalpies= -1190.312628  
Sum of electronic and thermal Free Energies= -1190.390629

jugcathanin-6-TS (dmf)

|   |           |           |           |
|---|-----------|-----------|-----------|
| C | -0.938389 | 2.872198  | -0.115133 |
| O | -1.206183 | 4.197609  | 0.046586  |
| H | -0.394914 | 4.673888  | -0.207989 |
| C | -1.943637 | 1.911315  | 0.122132  |
| C | -1.535786 | 0.609211  | -0.076223 |
| H | -2.242446 | -0.179471 | 0.023936  |
| C | -0.269114 | 0.223410  | -0.408994 |
| H | -0.108492 | -0.828206 | -0.442486 |
| C | 0.724103  | 1.143586  | -0.700910 |
| O | 1.986267  | 0.723533  | -1.147172 |
| C | 0.374291  | 2.500084  | -0.544653 |
| O | 1.229027  | 3.551971  | -0.810777 |
| C | 2.388372  | 3.622463  | 0.042852  |
| H | 3.005661  | 2.723727  | -0.062097 |
| H | 2.952051  | 4.502148  | -0.283086 |
| H | 2.089454  | 3.745162  | 1.093173  |
| C | 2.004445  | -3.129575 | 0.360926  |
| H | 1.870299  | -4.056931 | 0.916562  |
| C | 1.129736  | -2.811280 | -0.687498 |
| C | -0.232357 | -3.493642 | -0.846594 |
| H | -0.120929 | -4.583192 | -0.785474 |
| H | -0.652529 | -3.267632 | -1.833876 |
| C | -1.283791 | -3.054032 | 0.249283  |
| H | -1.641572 | -3.944295 | 0.788097  |
| H | -0.819048 | -2.435164 | 1.030247  |
| C | -2.562768 | -2.327042 | -0.226695 |
| C | -3.629343 | -1.926370 | 0.841392  |
| H | -3.509298 | -2.605729 | 1.695853  |
| H | -4.589032 | -2.169943 | 0.366098  |
| C | -3.763103 | -0.477248 | 1.461869  |
| H | -4.534845 | -0.596170 | 2.233636  |
| C | -4.193359 | 0.722176  | 0.532518  |
| H | -4.208644 | 0.393314  | -0.515481 |
| C | -3.378225 | 2.060112  | 0.613388  |
| H | -3.919029 | 2.819839  | 0.030775  |
| H | -3.381523 | 2.428566  | 1.651744  |
| H | -5.233408 | 0.976422  | 0.773737  |
| H | -2.845502 | -0.234903 | 2.010537  |
| O | -2.792748 | -2.157551 | -1.411152 |
| C | 1.394535  | -1.618182 | -1.386902 |
| H | 0.755920  | -1.339166 | -2.221423 |
| C | 2.223305  | -0.632052 | -0.840687 |
| C | 3.089872  | -0.952164 | 0.221759  |
| O | 3.892857  | 0.042203  | 0.681395  |
| C | 4.730999  | -0.238759 | 1.801887  |
| H | 4.140372  | -0.523313 | 2.683552  |
| H | 5.269125  | 0.690429  | 2.009272  |
| H | 5.453836  | -1.033781 | 1.573147  |
| C | 3.021035  | -2.250387 | 0.758618  |
| H | 3.685816  | -2.540640 | 1.566488  |

Sum of electronic and zero-point Energies= -1190.263706  
Sum of electronic and thermal Energies= -1190.240594  
Sum of electronic and thermal Enthalpies= -1190.239649  
Sum of electronic and thermal Free Energies= -1190.314397

jugcathanin-6-E1 (dmf)

|   |           |          |           |
|---|-----------|----------|-----------|
| C | -1.784897 | 2.020713 | -0.321607 |
| O | -2.530952 | 2.312519 | -1.421987 |
| H | -1.900661 | 2.481062 | -2.145300 |
| C | -2.418882 | 1.628796 | 0.870061  |

|   |           |           |           |
|---|-----------|-----------|-----------|
| C | -1.608356 | 1.393663  | 1.989263  |
| H | -2.082091 | 1.133906  | 2.934122  |
| C | -0.214106 | 1.395256  | 1.902262  |
| H | 0.405208  | 1.126182  | 2.754293  |
| C | 0.391003  | 1.644243  | 0.670807  |
| O | 1.750134  | 1.416370  | 0.507118  |
| C | -0.382358 | 2.030327  | -0.428955 |
| O | 0.126323  | 2.276305  | -1.683429 |
| C | 1.053357  | 3.374711  | -1.780812 |
| H | 1.976651  | 3.155387  | -1.234462 |
| H | 1.272620  | 3.489870  | -2.846530 |
| H | 0.601669  | 4.298488  | -1.395170 |
| C | 2.887015  | -2.509488 | -0.336621 |
| H | 3.219294  | -3.527398 | -0.534459 |
| C | 1.532340  | -2.186173 | -0.443465 |
| C | 0.507188  | -3.222870 | -0.873729 |
| H | 0.992659  | -4.206109 | -0.861587 |
| H | 0.216440  | -3.034358 | -1.917505 |
| C | -0.787974 | -3.302182 | -0.037286 |
| H | -1.134831 | -4.346215 | 0.013262  |
| H | -0.620264 | -3.013350 | 1.011345  |
| C | -1.978197 | -2.505197 | -0.564854 |
| C | -3.265622 | -2.586525 | 0.253703  |
| H | -3.204634 | -3.434225 | 0.946980  |
| H | -4.097121 | -2.777968 | -0.438698 |
| C | -3.538611 | -1.287728 | 1.057672  |
| H | -4.245419 | -1.526161 | 1.864652  |
| C | -4.096659 | -0.122895 | 0.218522  |
| H | -3.622497 | -0.120750 | -0.769999 |
| C | -3.888959 | 1.275705  | 0.863877  |
| H | -4.466840 | 2.015592  | 0.296045  |
| H | -4.277922 | 1.276351  | 1.891330  |
| H | -5.171562 | -0.284549 | 0.049600  |
| H | -2.606639 | -0.985736 | 1.553248  |
| O | -1.916496 | -1.847573 | -1.591385 |
| C | 1.152445  | -0.860891 | -0.168940 |
| H | 0.108847  | -0.581479 | -0.256999 |
| C | 2.086063  | 0.103759  | 0.204834  |
| C | 3.457627  | -0.226777 | 0.293924  |
| O | 4.299349  | 0.780657  | 0.653045  |
| C | 5.686799  | 0.475326  | 0.761415  |
| H | 5.873110  | -0.288789 | 1.529324  |
| H | 6.175005  | 1.409146  | 1.055312  |
| H | 6.101737  | 0.135215  | -0.197924 |
| C | 3.840069  | -1.543340 | 0.019956  |
| H | 4.884659  | -1.830929 | 0.092057  |

Sum of electronic and zero-point Energies= -1190.337839  
Sum of electronic and thermal Energies= -1190.313691  
Sum of electronic and thermal Enthalpies= -1190.312747  
Sum of electronic and thermal Free Energies= -1190.391323

jugcathanin-6-E2 (dmf)

|   |           |           |           |
|---|-----------|-----------|-----------|
| C | -1.827959 | 2.151383  | 0.236253  |
| O | -2.524767 | 2.587380  | 1.322597  |
| H | -1.860040 | 2.856974  | 1.981682  |
| C | -2.507687 | 1.615829  | -0.865476 |
| C | -1.744578 | 1.251064  | -1.985638 |
| H | -2.254633 | 0.875144  | -2.870913 |
| C | -0.353251 | 1.270127  | -1.955496 |
| H | 0.233554  | 0.906440  | -2.795420 |
| C | 0.311415  | 1.661629  | -0.789202 |
| O | 1.680814  | 1.458290  | -0.682615 |
| C | -0.415128 | 2.177717  | 0.290238  |
| O | 0.089025  | 2.728725  | 1.443289  |
| C | 1.160003  | 2.075179  | 2.147622  |
| H | 2.118223  | 2.238170  | 1.646025  |
| H | 1.181107  | 2.536484  | 3.139700  |
| H | 0.965178  | 1.000691  | 2.249136  |
| C | 2.971046  | -2.402369 | 0.248723  |
| H | 3.345870  | -3.392376 | 0.503938  |

|   |           |           |           |
|---|-----------|-----------|-----------|
| C | 1.596775  | -2.191231 | 0.112534  |
| C | 0.606307  | -3.334137 | 0.273325  |
| H | 1.112162  | -4.150601 | 0.802778  |
| H | 0.345358  | -3.727850 | -0.720176 |
| C | -0.713261 | -3.010214 | 1.004315  |
| H | -1.036305 | -3.883909 | 1.592138  |
| H | -0.589574 | -2.206856 | 1.746013  |
| C | -1.905905 | -2.662723 | 0.115819  |
| C | -3.208857 | -2.314760 | 0.834699  |
| H | -3.145475 | -2.640928 | 1.879965  |
| H | -4.021343 | -2.878751 | 0.355886  |
| C | -3.527425 | -0.796319 | 0.792387  |
| H | -4.244565 | -0.573856 | 1.594516  |
| C | -4.095683 | -0.304000 | -0.552139 |
| H | -3.579036 | -0.817865 | -1.372531 |
| C | -3.968571 | 1.227304  | -0.779988 |
| H | -4.482987 | 1.482841  | -1.716580 |
| H | -4.470901 | 1.774236  | 0.026127  |
| H | -5.155499 | -0.590978 | -0.621804 |
| H | -2.613593 | -0.243448 | 1.044938  |
| O | -1.834101 | -2.679599 | -1.102364 |
| C | 1.163341  | -0.894356 | -0.211492 |
| H | 0.103157  | -0.705430 | -0.327855 |
| C | 2.064087  | 0.154539  | -0.394381 |
| C | 3.452828  | -0.068315 | -0.256988 |
| O | 4.257730  | 1.014634  | -0.437326 |
| C | 5.663428  | 0.823542  | -0.303076 |
| H | 5.930371  | 0.486159  | 0.708356  |
| H | 6.115643  | 1.802309  | -0.488119 |
| H | 6.044571  | 0.102436  | -1.039782 |
| C | 3.888980  | -1.357788 | 0.063180  |
| H | 4.949738  | -1.557081 | 0.182010  |

Sum of electronic and zero-point Energies= -1190.334183

Sum of electronic and thermal Energies= -1190.310103

Sum of electronic and thermal Enthalpies= -1190.309158

Sum of electronic and thermal Free Energies= -1190.387586

jugcathanin-7-TS (dmf)

|   |           |           |           |
|---|-----------|-----------|-----------|
| C | 0.447999  | 2.965108  | -0.160892 |
| O | 0.484118  | 4.302806  | 0.093135  |
| H | -0.402272 | 4.645563  | -0.123104 |
| C | 1.594162  | 2.171082  | 0.051937  |
| C | 1.420602  | 0.837606  | -0.254671 |
| H | 2.229364  | 0.157236  | -0.128863 |
| C | 0.257282  | 0.284028  | -0.697778 |
| H | 0.281926  | -0.769100 | -0.834826 |
| C | -0.893231 | 1.026381  | -0.892213 |
| O | -2.072810 | 0.386110  | -1.313566 |
| C | -0.787140 | 2.405496  | -0.624404 |
| O | -1.814793 | 3.311829  | -0.796595 |
| C | -2.945793 | 3.120067  | 0.077394  |
| H | -2.642830 | 3.218438  | 1.129158  |
| H | -3.659654 | 3.910652  | -0.173850 |
| H | -3.401009 | 2.137515  | -0.083481 |
| C | -1.297219 | -3.268675 | 0.441981  |
| H | -0.944474 | -4.104156 | 1.044259  |
| C | -0.619599 | -2.931431 | -0.736077 |
| C | 0.754468  | -3.525640 | -1.059342 |
| H | 0.751606  | -3.937110 | -2.079122 |
| H | 0.926768  | -4.373547 | -0.384848 |
| C | 2.026796  | -2.598761 | -1.005160 |
| H | 1.946647  | -1.770891 | -1.724961 |
| H | 2.864866  | -3.200864 | -1.388196 |
| C | 2.500781  | -2.019745 | 0.344703  |
| C | 3.922368  | -1.363062 | 0.435389  |
| H | 4.572441  | -1.928927 | -0.246256 |
| H | 4.248004  | -1.593809 | 1.458085  |
| C | 4.262480  | 0.160502  | 0.173187  |
| H | 5.359109  | 0.186965  | 0.218960  |
| C | 3.718443  | 1.252008  | 1.175812  |

|   |           |           |           |
|---|-----------|-----------|-----------|
| H | 3.061736  | 0.775229  | 1.916168  |
| C | 2.970038  | 2.511769  | 0.610316  |
| H | 3.592785  | 2.996541  | -0.158752 |
| H | 2.884323  | 3.243920  | 1.425146  |
| H | 4.577453  | 1.631709  | 1.743713  |
| H | 4.019643  | 0.421140  | -0.864217 |
| O | 1.845797  | -2.172586 | 1.360022  |
| C | -1.152616 | -1.861403 | -1.483499 |
| H | -0.671206 | -1.561309 | -2.412239 |
| C | -2.065287 | -0.968481 | -0.906975 |
| C | -2.742327 | -1.319483 | 0.277187  |
| O | -3.643311 | -0.423826 | 0.759034  |
| C | -4.271163 | -0.713042 | 2.007702  |
| H | -3.532147 | -0.811655 | 2.814613  |
| H | -4.875830 | -1.628413 | 1.950860  |
| H | -4.924514 | 0.139085  | 2.214821  |
| C | -2.393875 | -2.528046 | 0.901744  |
| H | -2.897760 | -2.836544 | 1.812650  |

Sum of electronic and zero-point Energies= -1190.260022

Sum of electronic and thermal Energies= -1190.236874

Sum of electronic and thermal Enthalpies= -1190.235929

Sum of electronic and thermal Free Energies= -1190.310851

jugcathanin-7-E1 (dmf)

|   |           |           |           |
|---|-----------|-----------|-----------|
| C | 1.511364  | 2.077339  | -0.435741 |
| O | 2.005910  | 2.373692  | -1.670442 |
| H | 1.236127  | 2.444950  | -2.263106 |
| C | 2.383768  | 1.822419  | 0.634026  |
| C | 1.814886  | 1.597442  | 1.896449  |
| H | 2.475672  | 1.438397  | 2.747093  |
| C | 0.435394  | 1.474468  | 2.074231  |
| H | 0.009830  | 1.214785  | 3.040339  |
| C | -0.402747 | 1.572180  | 0.963260  |
| O | -1.738105 | 1.207665  | 1.059749  |
| C | 0.118790  | 1.946690  | -0.279822 |
| O | -0.622866 | 2.060568  | -1.432340 |
| C | -1.710242 | 3.006681  | -1.405340 |
| H | -1.362311 | 3.984878  | -1.047924 |
| H | -2.054135 | 3.095773  | -2.440273 |
| H | -2.526479 | 2.645677  | -0.772016 |
| C | -2.673586 | -2.596849 | -0.378319 |
| H | -2.949760 | -3.575072 | -0.768799 |
| C | -1.355540 | -2.351013 | 0.014410  |
| C | -0.289764 | -3.430748 | -0.070850 |
| H | -0.741036 | -4.320491 | -0.525914 |
| H | 0.020595  | -3.721670 | 0.942914  |
| C | 0.984532  | -3.066180 | -0.864000 |
| H | 0.773355  | -2.353895 | -1.675714 |
| H | 1.375725  | -3.961449 | -1.372928 |
| C | 2.154984  | -2.524534 | -0.047978 |
| C | 3.406760  | -2.141964 | -0.835117 |
| H | 3.355013  | -2.581805 | -1.838383 |
| H | 4.278745  | -2.572652 | -0.323830 |
| C | 3.571030  | -0.603392 | -0.956595 |
| H | 4.220182  | -0.392035 | -1.817360 |
| C | 4.155180  | 0.071577  | 0.299339  |
| H | 3.752957  | -0.418727 | 1.194973  |
| C | 3.862970  | 1.593410  | 0.407220  |
| H | 4.206208  | 2.109780  | -0.497124 |
| H | 4.436715  | 1.998907  | 1.251487  |
| H | 5.243668  | -0.087470 | 0.317828  |
| H | 2.594843  | -0.169643 | -1.205223 |
| O | 2.105703  | -2.410909 | 1.166619  |
| C | -1.048398 | -1.071497 | 0.508940  |
| H | -0.037593 | -0.859638 | 0.840046  |
| C | -2.013793 | -0.070316 | 0.589076  |
| C | -3.347300 | -0.329759 | 0.201639  |
| O | -4.223909 | 0.706078  | 0.320297  |
| C | -5.574341 | 0.478002  | -0.074700 |
| H | -6.040626 | -0.315267 | 0.526187  |

|   |           |           |           |
|---|-----------|-----------|-----------|
| H | -5.644462 | 0.217150  | -1.140102 |
| H | -6.099140 | 1.421336  | 0.101866  |
| C | -3.661100 | -1.604928 | -0.278722 |
| H | -4.675038 | -1.832742 | -0.593528 |

Sum of electronic and zero-point Energies= -1190.338005  
Sum of electronic and thermal Energies= -1190.313944  
Sum of electronic and thermal Enthalpies= -1190.313000  
Sum of electronic and thermal Free Energies= -1190.390835

jugcathanin-7-E2 (dmf)

|   |           |           |           |
|---|-----------|-----------|-----------|
| C | 1.933798  | 2.095165  | 0.189520  |
| O | 2.782931  | 2.479332  | 1.181569  |
| H | 2.221287  | 2.800111  | 1.910385  |
| C | 2.448955  | 1.539086  | -0.991956 |
| C | 1.536262  | 1.221933  | -2.008322 |
| H | 1.913931  | 0.842308  | -2.955710 |
| C | 0.159940  | 1.304984  | -1.804812 |
| H | -0.541635 | 0.976789  | -2.567759 |
| C | -0.335055 | 1.724843  | -0.567581 |
| O | -1.689330 | 1.589291  | -0.292761 |
| C | 0.544369  | 2.196970  | 0.414049  |
| O | 0.191847  | 2.763578  | 1.617858  |
| C | -0.641614 | 2.009804  | 2.518990  |
| H | -0.274294 | 0.981743  | 2.625934  |
| H | -0.573182 | 2.523554  | 3.482823  |
| H | -1.681974 | 2.003987  | 2.180705  |
| C | -3.022773 | -2.335569 | 0.210272  |
| H | -3.401505 | -3.349969 | 0.325350  |
| C | -1.669546 | -2.067769 | 0.434801  |
| C | -0.707389 | -3.158340 | 0.876212  |
| H | -1.242487 | -4.115224 | 0.849669  |
| H | -0.423066 | -2.991091 | 1.925231  |
| C | 0.592870  | -3.304443 | 0.055785  |
| H | 0.440602  | -3.047923 | -1.003719 |
| H | 0.905654  | -4.360322 | 0.044760  |
| C | 1.806162  | -2.528016 | 0.560596  |
| C | 3.096998  | -2.698327 | -0.238870 |
| H | 3.011847  | -3.580872 | -0.884289 |
| H | 3.916646  | -2.878588 | 0.470311  |
| C | 3.417075  | -1.455557 | -1.112044 |
| H | 4.092162  | -1.768223 | -1.920680 |
| C | 4.053605  | -0.280006 | -0.346450 |
| H | 3.609641  | -0.207488 | 0.653919  |
| C | 3.892557  | 1.094732  | -1.055718 |
| H | 4.216329  | 1.014067  | -2.102554 |
| H | 4.548004  | 1.825415  | -0.566592 |
| H | 5.123914  | -0.486390 | -0.198816 |
| H | 2.490153  | -1.131261 | -1.602288 |
| O | 1.760245  | -1.817329 | 1.552498  |
| C | -1.231634 | -0.743966 | 0.265849  |
| H | -0.189347 | -0.505959 | 0.445584  |
| C | -2.103062 | 0.272023  | -0.122461 |
| C | -3.472760 | -0.001873 | -0.331380 |
| O | -4.253949 | 1.051117  | -0.694054 |
| C | -5.639327 | 0.801492  | -0.915764 |
| H | -6.132305 | 0.426807  | -0.007700 |
| H | -5.794384 | 0.085870  | -1.735521 |
| H | -6.074885 | 1.766380  | -1.191364 |
| C | -3.915289 | -1.318340 | -0.159718 |
| H | -4.959899 | -1.564604 | -0.324547 |

Sum of electronic and zero-point Energies= -1190.335099  
Sum of electronic and thermal Energies= -1190.311005  
Sum of electronic and thermal Enthalpies= -1190.310061  
Sum of electronic and thermal Free Energies= -1190.388377

jugcathanin-8-TS (dmf)

|   |          |          |           |
|---|----------|----------|-----------|
| C | 0.737443 | 2.909200 | -0.176983 |
| O | 0.888830 | 4.255990 | -0.044719 |
| H | 0.022884 | 4.652238 | -0.251086 |
| C | 1.836002 | 2.045960 | 0.007282  |

|   |           |           |           |
|---|-----------|-----------|-----------|
| C | 1.544009  | 0.710416  | -0.169180 |
| H | 2.333372  | 0.005719  | -0.081877 |
| C | 0.310997  | 0.200356  | -0.464741 |
| H | 0.254030  | -0.862049 | -0.531596 |
| C | -0.786575 | 1.025165  | -0.652986 |
| O | -2.045073 | 0.495972  | -0.980795 |
| C | -0.561402 | 2.407125  | -0.500098 |
| O | -1.552588 | 3.356829  | -0.662583 |
| C | -2.499071 | 3.407013  | 0.424332  |
| H | -3.257530 | 4.141820  | 0.137130  |
| H | -2.967962 | 2.429244  | 0.579586  |
| H | -2.008320 | 3.728222  | 1.353696  |
| C | -1.744358 | -3.275726 | 0.714654  |
| H | -1.521651 | -4.168901 | 1.296768  |
| C | -0.973349 | -2.970785 | -0.419929 |
| C | 0.375798  | -3.646447 | -0.674786 |
| H | 0.708960  | -3.460118 | -1.702695 |
| H | 0.278230  | -4.732560 | -0.557519 |
| C | 1.498786  | -3.153589 | 0.316248  |
| H | 2.044045  | -4.029715 | 0.701712  |
| H | 1.055426  | -2.686370 | 1.204252  |
| C | 2.600779  | -2.218301 | -0.231850 |
| C | 3.508955  | -1.522520 | 0.820912  |
| H | 4.218904  | -2.310164 | 1.120063  |
| H | 2.913586  | -1.321819 | 1.720502  |
| C | 4.325000  | -0.243200 | 0.389182  |
| H | 5.379786  | -0.459104 | 0.595778  |
| C | 3.991219  | 1.122851  | 1.120835  |
| H | 3.414183  | 0.900189  | 2.030032  |
| C | 3.284234  | 2.321327  | 0.386976  |
| H | 3.349709  | 3.191013  | 1.054970  |
| H | 3.865803  | 2.593322  | -0.508831 |
| H | 4.947852  | 1.530340  | 1.472809  |
| H | 4.263914  | -0.132183 | -0.701526 |
| O | 2.790723  | -2.084094 | -1.426227 |
| C | -1.336954 | -1.827930 | -1.152567 |
| H | -0.787056 | -1.576345 | -2.055759 |
| C | -2.172232 | -0.850822 | -0.589144 |
| C | -2.949697 | -1.167620 | 0.535601  |
| O | -3.792867 | -0.262761 | 1.125272  |
| C | -4.878215 | 0.186586  | 0.299615  |
| H | -4.518284 | 0.715302  | -0.590956 |
| H | -5.467154 | 0.871978  | 0.917020  |
| H | -5.507697 | -0.661649 | -0.004770 |
| C | -2.769636 | -2.423304 | 1.135175  |
| H | -3.377619 | -2.668440 | 2.003420  |

Sum of electronic and zero-point Energies= -1190.267671  
Sum of electronic and thermal Energies= -1190.244173  
Sum of electronic and thermal Enthalpies= -1190.243229  
Sum of electronic and thermal Free Energies= -1190.319115

jugcathanin-8-E1 (dmf)

|   |           |           |           |
|---|-----------|-----------|-----------|
| C | 1.846033  | 1.751841  | -0.424638 |
| O | 2.527248  | 1.930969  | -1.590504 |
| H | 1.855663  | 2.004523  | -2.292480 |
| C | 2.540036  | 1.501321  | 0.770774  |
| C | 1.781544  | 1.362521  | 1.942532  |
| H | 2.300175  | 1.202101  | 2.886373  |
| C | 0.384686  | 1.355944  | 1.925110  |
| H | -0.191202 | 1.184481  | 2.831051  |
| C | -0.283010 | 1.513248  | 0.709705  |
| O | -1.663387 | 1.367974  | 0.648247  |
| C | 0.439219  | 1.766502  | -0.459402 |
| O | -0.146179 | 1.907820  | -1.698161 |
| C | -0.875008 | 3.136900  | -1.888854 |
| H | -1.234296 | 3.118762  | -2.922056 |
| H | -1.727073 | 3.196291  | -1.202610 |
| H | -0.218724 | 4.005020  | -1.740723 |
| C | -3.161400 | -2.470204 | -0.059972 |
| H | -3.577526 | -3.463928 | -0.216188 |

|   |           |           |           |
|---|-----------|-----------|-----------|
| C | -1.787601 | -2.253273 | -0.227375 |
| C | -0.860160 | -3.382667 | -0.647375 |
| H | -0.652076 | -3.313701 | -1.725235 |
| H | -1.381994 | -4.334944 | -0.494492 |
| C | 0.496091  | -3.427193 | 0.088102  |
| H | 0.900004  | -4.450308 | 0.023521  |
| H | 0.378304  | -3.214298 | 1.157662  |
| C | 1.588119  | -2.536515 | -0.512795 |
| C | 2.561592  | -1.915769 | 0.475681  |
| H | 2.902173  | -2.706037 | 1.163041  |
| H | 1.955887  | -1.246479 | 1.105627  |
| C | 3.754372  | -1.163606 | -0.134218 |
| H | 4.478403  | -1.902132 | -0.504443 |
| C | 4.453993  | -0.208710 | 0.866646  |
| H | 4.277050  | -0.561895 | 1.892954  |
| C | 4.038918  | 1.285186  | 0.765011  |
| H | 4.495927  | 1.826994  | 1.604955  |
| H | 4.461380  | 1.708097  | -0.153226 |
| H | 5.541899  | -0.250129 | 0.718136  |
| H | 3.419051  | -0.606876 | -1.017395 |
| O | 1.660838  | -2.350894 | -1.715676 |
| C | -1.290577 | -0.960763 | -0.003041 |
| H | -0.232921 | -0.763487 | -0.128376 |
| C | -2.125921 | 0.089471  | 0.383533  |
| C | -3.507849 | -0.134819 | 0.539794  |
| O | -4.347124 | 0.860334  | 0.979880  |
| C | -4.723705 | 1.812596  | -0.021463 |
| H | -3.851417 | 2.346930  | -0.419937 |
| H | -5.392564 | 2.527739  | 0.468732  |
| H | -5.258609 | 1.322920  | -0.848466 |
| C | -4.006900 | -1.417946 | 0.308368  |
| H | -5.073539 | -1.583661 | 0.446550  |

Sum of electronic and zero-point Energies= -1190.335955

Sum of electronic and thermal Energies= -1190.311404

Sum of electronic and thermal Enthalpies= -1190.310460

Sum of electronic and thermal Free Energies= -1190.390855

#### jugcathanin-8-E2 (dmf)

|   |           |           |           |
|---|-----------|-----------|-----------|
| C | 2.038411  | 1.925211  | 0.270732  |
| O | 2.866450  | 2.354562  | 1.262501  |
| H | 2.292297  | 2.692576  | 1.973098  |
| C | 2.581488  | 1.332373  | -0.878628 |
| C | 1.691787  | 0.956280  | -1.895456 |
| H | 2.092276  | 0.534673  | -2.815118 |
| C | 0.311766  | 1.063605  | -1.737604 |
| H | -0.370276 | 0.716135  | -2.509589 |
| C | -0.214648 | 1.557104  | -0.541207 |
| O | -1.588673 | 1.526918  | -0.327431 |
| C | 0.642356  | 2.040052  | 0.456143  |
| O | 0.276008  | 2.654177  | 1.628191  |
| C | -0.753531 | 2.066899  | 2.444564  |
| H | -0.638401 | 2.519804  | 3.434101  |
| H | -1.747569 | 2.296264  | 2.049341  |
| H | -0.621217 | 0.980795  | 2.522908  |
| C | -3.349502 | -2.202986 | 0.362606  |
| H | -3.836142 | -3.158350 | 0.552107  |
| C | -1.949518 | -2.117519 | 0.362596  |
| C | -1.091132 | -3.352863 | 0.593174  |
| H | -0.993322 | -3.908406 | -0.351190 |
| H | -1.620808 | -4.020956 | 1.284012  |
| C | 0.327705  | -3.094746 | 1.134014  |
| H | 0.707495  | -4.027310 | 1.581163  |
| H | 0.321690  | -2.354511 | 1.943925  |
| C | 1.370981  | -2.714292 | 0.077686  |
| C | 2.473231  | -1.771417 | 0.538698  |
| H | 2.853766  | -2.136394 | 1.505425  |
| H | 1.969701  | -0.823470 | 0.783022  |
| C | 3.622412  | -1.539818 | -0.454418 |
| H | 4.278663  | -2.420663 | -0.437958 |
| C | 4.456178  | -0.268805 | -0.155350 |

|   |           |           |           |
|---|-----------|-----------|-----------|
| H | 4.408330  | -0.038089 | 0.917758  |
| C | 4.052721  | 0.994354  | -0.966089 |
| H | 4.665432  | 1.836982  | -0.618820 |
| H | 4.307032  | 0.826664  | -2.021321 |
| H | 5.514276  | -0.465312 | -0.377183 |
| H | 3.213801  | -1.492445 | -1.471636 |
| O | 1.314137  | -3.158139 | -1.056062 |
| C | -1.369044 | -0.865875 | 0.124217  |
| H | -0.292324 | -0.760776 | 0.135324  |
| C | -2.143282 | 0.271330  | -0.123650 |
| C | -3.546567 | 0.178067  | -0.124648 |
| O | -4.345191 | 1.283626  | -0.287533 |
| C | -4.390648 | 1.808544  | -1.620837 |
| H | -3.404433 | 2.155815  | -1.952443 |
| H | -5.082598 | 2.656652  | -1.592573 |
| H | -4.769856 | 1.054206  | -2.325499 |
| C | -4.130031 | -1.069254 | 0.118359  |
| H | -5.216460 | -1.130511 | 0.124396  |

Sum of electronic and zero-point Energies= -1190.334892

Sum of electronic and thermal Energies= -1190.310550

Sum of electronic and thermal Enthalpies= -1190.309606

Sum of electronic and thermal Free Energies= -1190.388807

#### pterocaraine-1-TS (dmf)

|   |           |           |           |
|---|-----------|-----------|-----------|
| C | -2.099523 | 1.921335  | 0.077427  |
| C | -1.288700 | 3.066132  | -0.050111 |
| H | -1.683783 | 4.071073  | 0.092782  |
| C | 0.090970  | 2.960365  | -0.362772 |
| O | 0.815075  | 4.113361  | -0.477352 |
| H | 1.736564  | 3.884961  | -0.678371 |
| C | 0.687773  | 1.692665  | -0.528262 |
| O | 2.066743  | 1.555354  | -0.820988 |
| C | -0.130825 | 0.589466  | -0.392023 |
| H | 0.235862  | -0.409713 | -0.471522 |
| C | -1.465489 | 0.712900  | -0.129194 |
| H | -2.025945 | -0.186308 | -0.083987 |
| C | 2.788531  | -2.225048 | 0.713621  |
| H | 2.822602  | -3.172314 | 1.250119  |
| C | 3.502206  | -1.137116 | 1.221631  |
| H | 4.115881  | -1.238317 | 2.114031  |
| C | 3.318246  | 0.142201  | 0.674598  |
| O | 3.844123  | 1.224026  | 1.308479  |
| H | 3.570009  | 2.019638  | 0.822595  |
| C | 2.544965  | 0.266249  | -0.485997 |
| C | 2.025569  | -0.875319 | -1.112594 |
| H | 1.451346  | -0.746792 | -2.026636 |
| C | 1.987918  | -2.106097 | -0.437884 |
| C | 0.887465  | -3.121360 | -0.755160 |
| H | 1.281479  | -4.141627 | -0.671793 |
| H | 0.535369  | -2.994293 | -1.785986 |
| C | -0.349189 | -3.003521 | 0.217776  |
| H | -0.068823 | -2.478561 | 1.139441  |
| H | -0.639931 | -4.013884 | 0.547041  |
| C | -1.657516 | -2.381472 | -0.323785 |
| C | -2.739941 | -2.007113 | 0.729680  |
| H | -2.237912 | -1.688934 | 1.652088  |
| H | -3.209417 | -2.972030 | 0.979799  |
| C | -3.873318 | -0.986075 | 0.323759  |
| H | -3.835333 | -0.825393 | -0.761847 |
| C | -3.940927 | 0.395229  | 1.100598  |
| H | -3.342806 | 0.310243  | 2.019381  |
| H | -4.979520 | 0.512089  | 1.436419  |
| C | -3.578054 | 1.765308  | 0.415715  |
| H | -3.908871 | 2.565269  | 1.092839  |
| H | -4.182250 | 1.881717  | -0.498486 |
| H | -4.828910 | -1.491994 | 0.504971  |
| O | -1.859264 | -2.254892 | -1.517017 |

Sum of electronic and zero-point Energies= -1036.513189

Sum of electronic and thermal Energies= -1036.494033

Sum of electronic and thermal Enthalpies= -1036.493089

Sum of electronic and thermal Free Energies= -1036.559020

pterocaraine-1-E1 (dmf)

|   |           |           |           |
|---|-----------|-----------|-----------|
| C | -2.578598 | 1.587061  | 0.294383  |
| C | -2.002644 | 1.771856  | -0.968228 |
| H | -2.608957 | 1.707434  | -1.869326 |
| C | -0.624854 | 1.976761  | -1.108075 |
| O | -0.089438 | 2.101497  | -2.351018 |
| H | 0.868875  | 2.232985  | -2.254104 |
| C | 0.178272  | 1.985391  | 0.038854  |
| O | 1.565866  | 2.000593  | -0.144267 |
| C | -0.388854 | 1.895235  | 1.308383  |
| H | 0.258114  | 1.927356  | 2.182498  |
| C | -1.765927 | 1.711277  | 1.436544  |
| H | -2.203392 | 1.609309  | 2.427767  |
| C | 3.535820  | -1.652533 | 0.279095  |
| H | 4.076036  | -2.587534 | 0.417700  |
| C | 4.199018  | -0.443350 | 0.518902  |
| H | 5.238318  | -0.429817 | 0.839752  |
| C | 3.526683  | 0.772180  | 0.376940  |
| O | 4.166424  | 1.946118  | 0.635446  |
| H | 3.521351  | 2.665712  | 0.534265  |
| C | 2.182170  | 0.748460  | -0.026018 |
| C | 1.533362  | -0.453825 | -0.287528 |
| H | 0.499662  | -0.431958 | -0.615197 |
| C | 2.193982  | -1.681637 | -0.125610 |
| C | 1.462506  | -2.991441 | -0.367673 |
| H | 2.124673  | -3.818459 | -0.085114 |
| H | 1.243794  | -3.116117 | -1.437882 |
| C | 0.129747  | -3.131388 | 0.403255  |
| H | 0.226893  | -2.765978 | 1.432844  |
| H | -0.126641 | -4.200425 | 0.479295  |
| C | -1.080127 | -2.483971 | -0.278066 |
| C | -2.097461 | -1.828776 | 0.641133  |
| H | -1.566666 | -0.982162 | 1.103924  |
| H | -2.302395 | -2.515531 | 1.476946  |
| C | -3.401735 | -1.359612 | -0.021995 |
| H | -3.170273 | -0.934891 | -1.006710 |
| C | -4.194068 | -0.335555 | 0.830441  |
| H | -3.917563 | -0.445588 | 1.888806  |
| H | -5.267765 | -0.561725 | 0.776124  |
| C | -4.024362 | 1.151020  | 0.412357  |
| H | -4.552541 | 1.775838  | 1.146910  |
| H | -4.523603 | 1.305024  | -0.553516 |
| H | -4.029121 | -2.239730 | -0.217452 |
| O | -1.203647 | -2.500290 | -1.491422 |

Sum of electronic and zero-point Energies= -1036.584686

Sum of electronic and thermal Energies= -1036.564709

Sum of electronic and thermal Enthalpies= -1036.563765

Sum of electronic and thermal Free Energies= -1036.633035

pterocaraine-1-E2 (dmf)

|   |           |           |           |
|---|-----------|-----------|-----------|
| C | -2.596777 | 1.519881  | -0.431496 |
| C | -2.044034 | 1.983651  | 0.771202  |
| H | -2.667929 | 2.132512  | 1.650687  |
| C | -0.665669 | 2.189828  | 0.893047  |
| O | -0.148207 | 2.581108  | 2.087478  |
| H | 0.816032  | 2.653315  | 1.986493  |
| C | 0.161090  | 1.939148  | -0.212673 |
| O | 1.543685  | 1.987056  | -0.006652 |
| C | -0.382290 | 1.573866  | -1.439839 |
| H | 0.279307  | 1.400317  | -2.285723 |
| C | -1.758917 | 1.370388  | -1.549181 |
| H | -2.179572 | 1.050782  | -2.500063 |
| C | 3.581780  | -1.651751 | -0.076971 |
| H | 4.143854  | -2.583852 | -0.111786 |
| C | 4.248661  | -0.449140 | -0.324727 |
| H | 5.313239  | -0.436106 | -0.548245 |
| C | 3.555030  | 0.765526  | -0.305860 |
| O | 4.208898  | 1.932118  | -0.566838 |

|   |           |           |           |
|---|-----------|-----------|-----------|
| H | 3.554619  | 2.650178  | -0.559991 |
| C | 2.184881  | 0.742843  | -0.016228 |
| C | 1.527270  | -0.456999 | 0.247272  |
| H | 0.469749  | -0.421681 | 0.476523  |
| C | 2.206132  | -1.680013 | 0.206939  |
| C | 1.484340  | -3.003541 | 0.421889  |
| H | 2.099087  | -3.639120 | 1.073218  |
| H | 1.415228  | -3.534133 | -0.538703 |
| C | 0.067550  | -2.914909 | 1.013549  |
| H | 0.038566  | -2.265565 | 1.897723  |
| H | -0.225510 | -3.916134 | 1.367893  |
| C | -1.030082 | -2.507680 | 0.023928  |
| C | -2.194516 | -1.722757 | 0.610121  |
| H | -1.768532 | -0.774615 | 0.971521  |
| H | -2.526326 | -2.239148 | 1.524611  |
| C | -3.378614 | -1.459533 | -0.332894 |
| H | -2.997063 | -1.242493 | -1.338392 |
| C | -4.303408 | -0.312868 | 0.148226  |
| H | -4.231759 | -0.217418 | 1.241367  |
| H | -5.350157 | -0.571139 | -0.063218 |
| C | -4.042494 | 1.074950  | -0.501249 |
| H | -4.694601 | 1.810834  | -0.009966 |
| H | -4.348780 | 1.030838  | -1.555019 |
| H | -3.961824 | -2.385379 | -0.428562 |
| O | -0.966531 | -2.813699 | -1.154075 |

Sum of electronic and zero-point Energies= -1036.584502

Sum of electronic and thermal Energies= -1036.564640

Sum of electronic and thermal Enthalpies= -1036.563695

Sum of electronic and thermal Free Energies= -1036.632105

pterocaraine-2-TS (dmf)

|   |           |           |           |
|---|-----------|-----------|-----------|
| C | -2.182611 | 1.823913  | 0.086942  |
| C | -1.427716 | 3.011789  | -0.007679 |
| H | -1.876644 | 3.991659  | 0.149652  |
| C | -0.044294 | 2.987584  | -0.319643 |
| O | 0.611817  | 4.180808  | -0.432750 |
| H | 1.544937  | 4.007574  | -0.634838 |
| C | 0.622586  | 1.754587  | -0.482995 |
| O | 2.005840  | 1.675435  | -0.779063 |
| C | -0.136124 | 0.611422  | -0.352815 |
| H | 0.295934  | -0.362305 | -0.388743 |
| C | -1.485081 | 0.655728  | -0.143516 |
| H | -1.991579 | -0.277726 | -0.139223 |
| C | 2.731082  | -2.148308 | 0.616692  |
| H | 2.751100  | -3.115233 | 1.116767  |
| C | 3.396975  | -1.072248 | 1.207817  |
| H | 3.955679  | -1.200258 | 2.132266  |
| C | 3.222337  | 0.222297  | 0.699562  |
| O | 3.686231  | 1.288408  | 1.403615  |
| H | 3.420635  | 2.096070  | 0.932918  |
| C | 2.509901  | 0.379988  | -0.495888 |
| C | 2.039612  | -0.741489 | -1.194768 |
| H | 1.487615  | -0.573889 | -2.117183 |
| C | 1.997164  | -2.002496 | -0.573674 |
| C | 1.021760  | -3.089971 | -1.034673 |
| H | 1.131143  | -3.951882 | -0.365079 |
| H | 1.299655  | -3.442919 | -2.038585 |
| C | -0.499533 | -2.726322 | -1.137342 |
| H | -1.003039 | -3.270303 | -1.635500 |
| H | -0.650514 | -1.883822 | -1.828015 |
| C | -1.326085 | -2.428586 | 0.130045  |
| C | -2.852375 | -2.187773 | -0.080596 |
| H | -3.294548 | -3.181080 | 0.094998  |
| H | -3.042707 | -1.969412 | -1.139138 |
| C | -3.596433 | -1.143404 | 0.845620  |
| H | -4.444975 | -1.670744 | 1.296734  |
| C | -4.180811 | 0.156644  | 0.148596  |
| H | -5.251948 | 0.192740  | 0.385148  |
| H | -4.127773 | 0.024366  | -0.941785 |
| C | -3.635958 | 1.591500  | 0.485895  |



H -4.303230 2.317356 -0.001073  
H -3.744185 1.772631 1.567334  
H -2.938435 -0.881375 1.684148  
O -0.836825 -2.425974 1.243662  
Sum of electronic and zero-point Energies= -1036.511534  
Sum of electronic and thermal Energies= -1036.492497  
Sum of electronic and thermal Enthalpies= -1036.491553  
Sum of electronic and thermal Free Energies= -1036.557040

pterocaraine-2-E1 (dmf)

C -2.596779 1.519833 0.431540  
C -2.044045 1.983693 -0.771127  
H -2.667957 2.132634 -1.650585  
C -0.665683 2.189877 -0.892973  
O -0.148243 2.581321 -2.087356  
H 0.816004 2.653460 -1.986398  
C 0.161082 1.939115 0.212725  
O 1.543676 1.987037 0.006698  
C -0.382283 1.573703 1.439857  
H 0.279335 1.400051 2.285704  
C -1.758912 1.370213 1.549200  
H -2.179545 1.050493 2.500052  
C 3.581817 -1.651753 0.076910  
H 4.143910 -2.583843 0.111681  
C 4.248696 -0.449129 0.324631  
H 5.313288 -0.436082 0.548079  
C 3.555047 0.765525 0.305816  
O 4.208911 1.932127 0.566764  
H 3.554637 2.650192 0.559895  
C 2.184875 0.742826 0.016269  
C 1.527268 -0.457027 -0.247185  
H 0.469735 -0.421735 -0.476387  
C 2.206154 -1.680031 -0.206908  
C 1.484347 -3.003552 -0.421839  
H 1.415187 -3.534107 0.538772  
H 2.099107 -3.639168 -1.073119  
C 0.067578 -2.914891 -1.013541  
H -0.225497 -3.916109 -1.367897  
H 0.038638 -2.265550 -1.897719  
C -1.030078 -2.507625 -0.023962  
C -2.194508 -1.722725 -0.610212  
H -2.526257 -2.239130 -1.524719  
H -1.768539 -0.774571 -0.971593  
C -3.378648 -1.459564 0.332768  
H -3.961862 -2.385417 0.428340  
C -4.303434 -0.312864 -0.148289  
H -5.350180 -0.571141 0.063155  
H -4.231808 -0.217368 -1.241430  
C -4.042505 1.074919 0.501250  
H -4.694589 1.810851 0.010010  
H -4.348796 1.030758 1.555018  
H -2.997133 -1.242608 1.338297  
O -0.966546 -2.813594 1.154053

Sum of electronic and zero-point Energies= -1036.584502  
Sum of electronic and thermal Energies= -1036.564640  
Sum of electronic and thermal Enthalpies= -1036.563695  
Sum of electronic and thermal Free Energies= -1036.632106

pterocaraine-2-E2 (dmf)

C -2.578602 1.587129 -0.294285  
C -2.002641 1.771626 0.968373  
H -2.608944 1.706975 1.869460  
C -0.624860 1.976487 1.108254  
O -0.089431 2.100918 2.351224  
H 0.868848 2.232670 2.254322  
C 0.178287 1.985399 -0.038674  
O 1.565880 2.000604 0.144440  
C -0.388854 1.895594 -1.308219  
H 0.258064 1.927991 -2.182361  
C -1.765942 1.711661 -1.436410

H -2.203387 1.609883 -2.427666  
C 3.535787 -1.652515 -0.279297  
H 4.075966 -2.587514 -0.418068  
C 4.198931 -0.443316 -0.519186  
H 5.238162 -0.429748 -0.840255  
C 3.526633 0.772210 -0.377019  
O 4.166343 1.946147 -0.635582  
H 3.521262 2.665728 -0.534346  
C 2.182201 0.748483 0.026217  
C 1.533465 -0.453814 0.287822  
H 0.499838 -0.431981 0.615719  
C 2.194053 -1.681624 0.125728  
C 1.462489 -2.991377 0.367791  
H 1.243516 -3.115934 1.437958  
H 2.124656 -3.818476 0.085467  
C 0.129844 -3.131278 -0.403381  
H -0.126511 -4.200313 -0.479590  
H 0.227127 -2.765741 -1.432906  
C -1.080153 -2.483989 0.277893  
C -2.097311 -1.828579 -0.641318  
H -2.302080 -2.515097 -1.477372  
H -1.566417 -0.981845 -1.103771  
C -3.401708 -1.359651 0.021700  
H -4.029015 -2.239901 0.216802  
C -4.194056 -0.335505 -0.830595  
H -5.267752 -0.561674 -0.776194  
H -3.917629 -0.445475 -1.888988  
C -4.024334 1.151031 -0.412370  
H -4.552513 1.775908 -1.146873  
H -4.523632 1.304916 0.553495  
H -3.170487 -0.935133 1.006568  
O -1.203848 -2.500552 1.491226

Sum of electronic and zero-point Energies= -1036.584687  
Sum of electronic and thermal Energies= -1036.564709  
Sum of electronic and thermal Enthalpies= -1036.563765  
Sum of electronic and thermal Free Energies= -1036.633040

pterocaraine-3-TS (dmf)

C -1.927996 2.036204 0.121028  
C -1.053377 3.135149 -0.011352  
H -1.398150 4.161068 0.111699  
C 0.318504 2.958342 -0.325187  
O 1.093556 4.073278 -0.477165  
H 2.002628 3.797974 -0.675608  
C 0.854244 1.659197 -0.456554  
O 2.218638 1.437444 -0.768534  
C -0.019339 0.605988 -0.287101  
H 0.297530 -0.410587 -0.317085  
C -1.354011 0.795216 -0.069865  
H -1.949417 -0.085084 -0.047504  
C 2.600921 -2.435332 0.638984  
H 2.540190 -3.392517 1.155163  
C 3.432310 -1.440640 1.160143  
H 4.043806 -1.628343 2.039997  
C 3.368032 -0.132943 0.653033  
O 3.997083 0.874265 1.315058  
H 3.793052 1.707334 0.858127  
C 2.599454 0.100334 -0.493563  
C 1.962001 -0.966668 -1.142629  
H 1.375989 -0.749642 -2.032386  
C 1.798753 -2.202624 -0.493860  
C 0.565025 -3.057843 -0.799986  
H 0.818843 -4.123911 -0.752352  
H 0.211854 -2.855577 -1.818142  
C -0.634956 -2.801877 0.197986  
H -0.335948 -2.153085 1.033703  
H -0.914352 -3.750321 0.681022  
C -1.953169 -2.241764 -0.385796  
C -3.159335 -2.018468 0.581861  
H -3.034612 -2.712511 1.423823

|   |           |           |           |
|---|-----------|-----------|-----------|
| H | -4.030342 | -2.359794 | 0.006611  |
| C | -3.537605 | -0.625254 | 1.230392  |
| H | -4.354313 | -0.875326 | 1.920186  |
| C | -4.036152 | 0.549873  | 0.302905  |
| H | -5.116402 | 0.663765  | 0.459820  |
| H | -3.922744 | 0.265437  | -0.752066 |
| C | -3.406406 | 1.974019  | 0.496998  |
| H | -3.995151 | 2.688158  | -0.096709 |
| H | -3.531846 | 2.286917  | 1.545742  |
| H | -2.713553 | -0.291383 | 1.871628  |
| O | -2.095332 | -2.075990 | -1.584394 |

Sum of electronic and zero-point Energies= -1036.505595

Sum of electronic and thermal Energies= -1036.486629

Sum of electronic and thermal Enthalpies= -1036.485685

Sum of electronic and thermal Free Energies= -1036.550991

#### pterocaraine-3-E1 (dmf)

|   |           |           |           |
|---|-----------|-----------|-----------|
| C | -2.294038 | 1.895169  | 0.379180  |
| C | -1.705834 | 2.169601  | -0.863645 |
| H | -2.313675 | 2.230560  | -1.764526 |
| C | -0.316974 | 2.255331  | -0.994049 |
| O | 0.232616  | 2.443272  | -2.222919 |
| H | 1.199604  | 2.439540  | -2.122866 |
| C | 0.482276  | 2.060029  | 0.141543  |
| O | 1.855243  | 1.878068  | -0.060197 |
| C | -0.089020 | 1.919592  | 1.401756  |
| H | 0.556901  | 1.793961  | 2.268105  |
| C | -1.478735 | 1.853321  | 1.522654  |
| H | -1.925938 | 1.691359  | 2.501062  |
| C | 3.199965  | -2.066068 | 0.167370  |
| H | 3.581231  | -3.082337 | 0.252140  |
| C | 4.049004  | -0.995494 | 0.470164  |
| H | 5.074697  | -1.167730 | 0.789106  |
| C | 3.583631  | 0.318585  | 0.390898  |
| O | 4.403531  | 1.358756  | 0.708622  |
| H | 3.882764  | 2.176816  | 0.647215  |
| C | 2.256317  | 0.534821  | -0.011216 |
| C | 1.419049  | -0.530901 | -0.331542 |
| H | 0.401420  | -0.337827 | -0.654341 |
| C | 1.873774  | -1.855523 | -0.236793 |
| C | 0.953732  | -3.018968 | -0.567819 |
| H | 1.505678  | -3.950758 | -0.396326 |
| H | 0.700485  | -2.997088 | -1.637211 |
| C | -0.368658 | -3.080654 | 0.228151  |
| H | -0.249953 | -2.691105 | 1.250307  |
| H | -0.672513 | -4.131158 | 0.362842  |
| C | -1.573530 | -2.393822 | -0.408391 |
| C | -2.872335 | -2.423612 | 0.395303  |
| H | -2.786533 | -3.163085 | 1.200546  |
| H | -3.681036 | -2.748850 | -0.273819 |
| C | -3.216696 | -1.038162 | 1.004798  |
| H | -3.904784 | -1.193888 | 1.847203  |
| C | -3.847718 | -0.045406 | 0.010185  |
| H | -4.908707 | -0.300763 | -0.126800 |
| H | -3.369811 | -0.158849 | -0.970888 |
| C | -3.738100 | 1.445218  | 0.437254  |
| H | -4.357494 | 2.048807  | -0.239850 |
| H | -4.140972 | 1.575099  | 1.451152  |
| H | -2.301737 | -0.613022 | 1.437546  |
| O | -1.514676 | -1.859850 | -1.504931 |

Sum of electronic and zero-point Energies= -1036.582852

Sum of electronic and thermal Energies= -1036.563061

Sum of electronic and thermal Enthalpies= -1036.562117

Sum of electronic and thermal Free Energies= -1036.630342

#### pterocaraine-3-E2 (dmf)

|   |           |          |           |
|---|-----------|----------|-----------|
| C | -2.310124 | 1.933347 | -0.240316 |
| C | -1.547953 | 2.151324 | 0.914295  |
| H | -2.022379 | 2.203998 | 1.892063  |
| C | -0.151658 | 2.201507 | 0.849339  |

|   |           |           |           |
|---|-----------|-----------|-----------|
| O | 0.562640  | 2.327394  | 1.999346  |
| H | 1.506200  | 2.363087  | 1.771138  |
| C | 0.476294  | 2.040414  | -0.393542 |
| O | 1.858091  | 1.833992  | -0.400025 |
| C | -0.271134 | 1.961064  | -1.565212 |
| H | 0.244497  | 1.861019  | -2.517823 |
| C | -1.663749 | 1.918419  | -1.489154 |
| H | -2.247045 | 1.791959  | -2.399140 |
| C | 3.214524  | -2.079190 | 0.109992  |
| H | 3.607339  | -3.082969 | 0.263146  |
| C | 4.098606  | -0.993802 | 0.128428  |
| H | 5.163438  | -1.142216 | 0.294622  |
| C | 3.624946  | 0.305839  | -0.052378 |
| O | 4.487324  | 1.361334  | -0.020096 |
| H | 3.977648  | 2.173360  | -0.174225 |
| C | 2.247543  | 0.496375  | -0.253571 |
| C | 1.372362  | -0.586619 | -0.290940 |
| H | 0.317847  | -0.416664 | -0.473757 |
| C | 1.841515  | -1.897083 | -0.103172 |
| C | 0.891919  | -3.083267 | -0.158663 |
| H | 1.430092  | -3.967038 | 0.204382  |
| H | 0.629028  | -3.290090 | -1.206348 |
| C | -0.424938 | -2.947967 | 0.635010  |
| H | -0.302378 | -2.323078 | 1.532511  |
| H | -0.728465 | -3.934028 | 1.020683  |
| C | -1.630801 | -2.430888 | -0.145158 |
| C | -2.934042 | -2.283367 | 0.638485  |
| H | -2.856410 | -2.835205 | 1.583044  |
| H | -3.740071 | -2.740321 | 0.047818  |
| C | -3.277036 | -0.800119 | 0.939950  |
| H | -3.984063 | -0.774647 | 1.780702  |
| C | -3.876675 | -0.030843 | -0.252230 |
| H | -4.937132 | -0.302652 | -0.358164 |
| H | -3.379561 | -0.346624 | -1.177945 |
| C | -3.761119 | 1.514987  | -0.138547 |
| H | -4.348540 | 1.968969  | -0.948136 |
| H | -4.196129 | 1.855153  | 0.811165  |
| H | -2.367071 | -0.300247 | 1.296506  |
| O | -1.567769 | -2.160538 | -1.333968 |

Sum of electronic and zero-point Energies= -1036.582349

Sum of electronic and thermal Energies= -1036.562531

Sum of electronic and thermal Enthalpies= -1036.561586

Sum of electronic and thermal Free Energies= -1036.629810

#### myricatomentogenin-1-TS (dmf)

|   |           |           |           |
|---|-----------|-----------|-----------|
| C | 2.949679  | -0.002294 | -0.166099 |
| O | 4.286501  | 0.051374  | -0.416690 |
| H | 4.536688  | 0.992382  | -0.377560 |
| C | 2.262801  | -1.232380 | -0.215564 |
| C | 0.916241  | -1.144097 | 0.063975  |
| H | 0.341699  | -2.036329 | 0.074560  |
| C | 0.236349  | 0.011581  | 0.326082  |
| H | -0.814603 | -0.092681 | 0.473431  |
| C | 0.883452  | 1.234889  | 0.365724  |
| O | 0.164518  | 2.418177  | 0.633046  |
| C | 2.270242  | 1.222189  | 0.124699  |
| O | 3.050558  | 2.360442  | 0.075261  |
| C | 3.207840  | 3.048078  | 1.331411  |
| H | 2.250312  | 3.455203  | 1.676004  |
| H | 3.620472  | 2.375725  | 2.095745  |
| H | 3.908934  | 3.867108  | 1.144041  |
| C | -3.599405 | 1.347823  | -0.722320 |
| H | -4.486018 | 0.941761  | -1.207559 |
| C | -3.115706 | 0.747367  | 0.455479  |
| C | -3.556999 | -0.656710 | 0.874333  |
| H | -4.650508 | -0.734459 | 0.834199  |
| H | -3.256642 | -0.859471 | 1.909423  |
| C | -2.964888 | -1.786539 | -0.052547 |
| H | -2.683166 | -1.377154 | -1.030446 |
| H | -3.760246 | -2.517175 | -0.270714 |

|   |           |           |           |
|---|-----------|-----------|-----------|
| C | -1.792741 | -2.641511 | 0.482380  |
| C | -1.038828 | -3.516910 | -0.558952 |
| H | -1.015835 | -2.979501 | -1.515496 |
| H | -1.716289 | -4.368854 | -0.729529 |
| C | 0.391813  | -4.072472 | -0.191500 |
| H | 0.340478  | -5.163042 | -0.290752 |
| C | 1.614979  | -3.593819 | -1.080186 |
| H | 2.142947  | -4.501318 | -1.400617 |
| C | 2.740484  | -2.644082 | -0.526075 |
| H | 3.188917  | -3.097322 | 0.372843  |
| H | 3.542777  | -2.624516 | -1.276402 |
| H | 1.220915  | -3.142238 | -2.002101 |
| H | 0.582562  | -3.890103 | 0.874298  |
| O | -1.518984 | -2.680611 | 1.667358  |
| C | -2.000940 | 1.347042  | 1.062977  |
| H | -1.610140 | 0.939428  | 1.991882  |
| C | -1.213800 | 2.264618  | 0.354389  |
| C | -1.687357 | 2.834265  | -0.833309 |
| O | -0.941730 | 3.722515  | -1.542858 |
| H | -0.091377 | 3.827033  | -1.082734 |
| C | -2.936891 | 2.422289  | -1.321048 |
| H | -3.316743 | 2.874381  | -2.234565 |

Sum of electronic and zero-point Energies= -1150.998748  
Sum of electronic and thermal Energies= -1150.976817  
Sum of electronic and thermal Enthalpies= -1150.975872  
Sum of electronic and thermal Free Energies= -1151.048648

#### myricatomentogenin-1-E1 (dmf)

|   |           |           |           |
|---|-----------|-----------|-----------|
| C | 1.773321  | 1.737969  | -0.388334 |
| O | 2.370491  | 2.011077  | -1.580357 |
| H | 1.660039  | 2.270771  | -2.194182 |
| C | 2.542833  | 1.246016  | 0.680521  |
| C | 1.890678  | 1.030318  | 1.901736  |
| H | 2.474672  | 0.684048  | 2.752204  |
| C | 0.508337  | 1.185900  | 2.043801  |
| H | 0.006042  | 0.953041  | 2.979198  |
| C | -0.247574 | 1.563754  | 0.936943  |
| O | -1.637753 | 1.540956  | 1.001072  |
| C | 0.380345  | 1.890009  | -0.271415 |
| O | -0.291301 | 2.243600  | -1.419249 |
| C | -1.009105 | 3.491999  | -1.368737 |
| H | -1.870140 | 3.422725  | -0.695308 |
| H | -0.349757 | 4.307877  | -1.044860 |
| H | -1.356744 | 3.681049  | -2.388612 |
| C | -3.596616 | -1.853462 | -0.415711 |
| H | -4.140767 | -2.714199 | -0.800890 |
| C | -2.227367 | -1.965445 | -0.140202 |
| C | -1.480951 | -3.272223 | -0.355442 |
| H | -2.123010 | -3.948018 | -0.933104 |
| H | -1.296915 | -3.767891 | 0.609009  |
| C | -0.121768 | -3.133358 | -1.075642 |
| H | -0.183966 | -2.424183 | -1.910119 |
| H | 0.146081  | -4.105921 | -1.519128 |
| C | 1.058442  | -2.779172 | -0.165724 |
| C | 2.114602  | -1.865814 | -0.766426 |
| H | 1.598623  | -0.912351 | -0.957044 |
| H | 2.367990  | -2.245587 | -1.768578 |
| C | 3.379370  | -1.648753 | 0.077918  |
| H | 3.999244  | -2.553298 | 0.014156  |
| C | 4.209633  | -0.416511 | -0.362054 |
| H | 5.280527  | -0.655927 | -0.309144 |
| C | 3.994462  | 0.866776  | 0.488066  |
| H | 4.441949  | 0.711114  | 1.478689  |
| H | 4.548769  | 1.688583  | 0.013881  |
| H | 4.000855  | -0.188020 | -1.415405 |
| H | 3.094754  | -1.557119 | 1.133756  |
| O | 1.132950  | -3.214521 | 0.970913  |
| C | -1.561323 | -0.829736 | 0.348506  |
| H | -0.505682 | -0.877392 | 0.589792  |
| C | -2.236009 | 0.372789  | 0.534870  |

|   |           |           |           |
|---|-----------|-----------|-----------|
| C | -3.611549 | 0.474671  | 0.267356  |
| O | -4.280335 | 1.648180  | 0.454367  |
| H | -3.648756 | 2.302262  | 0.795608  |
| C | -4.284554 | -0.651600 | -0.206696 |
| H | -5.347477 | -0.570653 | -0.423888 |

Sum of electronic and zero-point Energies= -1151.068202  
Sum of electronic and thermal Energies= -1151.045405  
Sum of electronic and thermal Enthalpies= -1151.044460  
Sum of electronic and thermal Free Energies= -1151.120132

#### myricatomentogenin-1-E2 (dmf)

|   |           |           |           |
|---|-----------|-----------|-----------|
| C | -2.122733 | -1.657210 | 0.298395  |
| O | -2.979614 | -1.859588 | 1.336481  |
| H | -2.459431 | -2.289097 | 2.039608  |
| C | -2.579251 | -1.067127 | -0.890261 |
| C | -1.661019 | -0.945450 | -1.944399 |
| H | -2.000433 | -0.531458 | -2.892297 |
| C | -0.316766 | -1.281057 | -1.792964 |
| H | 0.396310  | -1.124419 | -2.598546 |
| C | 0.137645  | -1.765208 | -0.563251 |
| O | 1.502496  | -1.940168 | -0.346239 |
| C | -0.766840 | -2.011435 | 0.472511  |
| O | -0.450858 | -2.601600 | 1.676332  |
| C | 0.366834  | -1.844318 | 2.590962  |
| H | 1.402024  | -1.785665 | 2.240439  |
| H | -0.038229 | -0.834724 | 2.735869  |
| H | 0.334726  | -2.390135 | 3.538832  |
| C | 3.813383  | 1.522420  | -0.112163 |
| H | 4.444626  | 2.408611  | -0.072907 |
| C | 2.462048  | 1.616836  | 0.249518  |
| C | 1.848207  | 2.930387  | 0.706846  |
| H | 2.589297  | 3.727440  | 0.572668  |
| H | 1.623934  | 2.890108  | 1.782515  |
| C | 0.548560  | 3.329842  | -0.027735 |
| H | 0.634831  | 3.158717  | -1.107779 |
| H | 0.388235  | 4.412687  | 0.099594  |
| C | -0.728411 | 2.676014  | 0.511072  |
| C | -1.786499 | 2.328410  | -0.522242 |
| H | -1.313391 | 1.588466  | -1.185585 |
| H | -1.943646 | 3.210878  | -1.162378 |
| C | -3.121054 | 1.795991  | 0.022729  |
| H | -3.686706 | 2.636909  | 0.445872  |
| C | -3.977090 | 1.077413  | -1.054531 |
| H | -5.024304 | 1.399526  | -0.973988 |
| C | -3.970771 | -0.474904 | -0.983377 |
| H | -4.555770 | -0.794732 | -0.114408 |
| H | -4.487725 | -0.862658 | -1.873053 |
| H | -3.644142 | 1.391944  | -2.053876 |
| H | -2.922816 | 1.120010  | 0.863659  |
| O | -0.871133 | 2.453879  | 1.702105  |
| C | 1.685150  | 0.450456  | 0.178338  |
| H | 0.638601  | 0.474031  | 0.460451  |
| C | 2.231603  | -0.754052 | -0.255441 |
| C | 3.587202  | -0.842994 | -0.610913 |
| O | 4.129843  | -2.018407 | -1.034728 |
| H | 3.418905  | -2.680133 | -1.064434 |
| C | 4.372827  | 0.308547  | -0.529501 |
| H | 5.421068  | 0.245385  | -0.813422 |

Sum of electronic and zero-point Energies= -1151.064355  
Sum of electronic and thermal Energies= -1151.041649  
Sum of electronic and thermal Enthalpies= -1151.040705  
Sum of electronic and thermal Free Energies= -1151.115632

#### myricatomentogenin-2-TS (dmf)

|   |           |          |           |
|---|-----------|----------|-----------|
| C | 0.104496  | 2.954427 | -0.067549 |
| O | 0.192753  | 4.304284 | 0.086254  |
| H | 1.128450  | 4.537744 | -0.051619 |
| C | -1.141856 | 2.309686 | 0.062558  |
| C | -1.093196 | 0.942539 | -0.112096 |
| H | -1.995816 | 0.379277 | -0.095090 |

|   |           |           |           |
|---|-----------|-----------|-----------|
| C | 0.048470  | 0.222416  | -0.312653 |
| H | -0.077171 | -0.834440 | -0.328014 |
| C | 1.278295  | 0.829783  | -0.501460 |
| O | 2.409329  | 0.047138  | -0.828146 |
| C | 1.303515  | 2.233772  | -0.379561 |
| O | 2.406419  | 3.037996  | -0.567215 |
| C | 3.615769  | 2.672870  | 0.118506  |
| H | 4.249179  | 3.565315  | 0.112209  |
| H | 3.406753  | 2.379747  | 1.155764  |
| H | 4.130941  | 1.860315  | -0.406209 |
| C | 1.190726  | -3.624561 | 0.647767  |
| H | 0.752761  | -4.468715 | 1.178824  |
| C | 0.540680  | -3.102579 | -0.486374 |
| C | -0.936574 | -3.389655 | -0.770909 |
| H | -1.135415 | -4.466605 | -0.708057 |
| H | -1.192188 | -3.073433 | -1.789266 |
| C | -1.912854 | -2.657767 | 0.233643  |
| H | -1.361979 | -2.183456 | 1.058454  |
| H | -2.551575 | -3.404054 | 0.729760  |
| C | -2.890136 | -1.607779 | -0.341754 |
| C | -3.876782 | -0.901616 | 0.640106  |
| H | -4.014450 | -1.567450 | 1.502365  |
| H | -4.829333 | -0.877506 | 0.093796  |
| C | -3.640503 | 0.540100  | 1.245438  |
| H | -4.462962 | 0.659260  | 1.962855  |
| C | -3.656117 | 1.789561  | 0.283936  |
| H | -3.680101 | 1.454274  | -0.761850 |
| C | -2.515576 | 2.856111  | 0.430386  |
| H | -2.499356 | 3.235966  | 1.464401  |
| H | -2.778718 | 3.720704  | -0.195911 |
| H | -4.602867 | 2.322113  | 0.440718  |
| H | -2.729163 | 0.528808  | 1.854434  |
| O | -2.969368 | -1.402563 | -1.540272 |
| C | 1.183033  | -2.047757 | -1.156585 |
| H | 0.726642  | -1.623951 | -2.047694 |
| C | 2.204058  | -1.321457 | -0.527051 |
| C | 2.822355  | -1.829491 | 0.621651  |
| O | 3.810139  | -1.152252 | 1.265990  |
| H | 3.961205  | -0.317818 | 0.791459  |
| C | 2.357498  | -3.043955 | 1.150983  |
| H | 2.849180  | -3.450806 | 2.031891  |

Sum of electronic and zero-point Energies= -1150.990850  
Sum of electronic and thermal Energies= -1150.969223  
Sum of electronic and thermal Enthalpies= -1150.968279  
Sum of electronic and thermal Free Energies= -1151.039590

#### myricatomentogenin-2-E1 (dmf)

|   |           |           |           |
|---|-----------|-----------|-----------|
| C | -1.683104 | 1.929592  | -0.304859 |
| O | -2.445546 | 2.173478  | -1.404956 |
| H | -1.829633 | 2.407673  | -2.122342 |
| C | -2.286257 | 1.459036  | 0.874303  |
| C | -1.465614 | 1.276593  | 1.995917  |
| H | -1.920150 | 0.957728  | 2.931930  |
| C | -0.076393 | 1.402441  | 1.920420  |
| H | 0.558644  | 1.171023  | 2.771872  |
| C | 0.508543  | 1.727017  | 0.697671  |
| O | 1.884775  | 1.595963  | 0.527366  |
| C | -0.285992 | 2.064051  | -0.402131 |
| O | 0.208248  | 2.373327  | -1.647587 |
| C | 1.020220  | 3.560893  | -1.724026 |
| H | 1.233657  | 3.711412  | -2.786428 |
| H | 0.475806  | 4.429272  | -1.329876 |
| H | 1.958460  | 3.429092  | -1.174608 |
| C | 3.333053  | -2.253584 | -0.150158 |
| H | 3.746761  | -3.249307 | -0.301064 |
| C | 1.975309  | -2.020824 | -0.408147 |
| C | 1.068895  | -3.130441 | -0.915894 |
| H | 1.641555  | -4.065545 | -0.914953 |
| H | 0.796715  | -2.932922 | -1.962681 |
| C | -0.238712 | -3.354945 | -0.125873 |

|   |           |           |           |
|---|-----------|-----------|-----------|
| H | -0.116265 | -3.126808 | 0.943580  |
| H | -0.511864 | -4.421878 | -0.154606 |
| C | -1.470707 | -2.611723 | -0.634823 |
| C | -2.758482 | -2.809179 | 0.162824  |
| H | -2.642200 | -3.665703 | 0.837802  |
| H | -3.564954 | -3.046946 | -0.544741 |
| C | -3.136987 | -1.551880 | 0.990190  |
| H | -3.819797 | -1.862106 | 1.793368  |
| C | -3.792132 | -0.423815 | 0.171602  |
| H | -3.312679 | -0.357182 | -0.812031 |
| C | -3.717739 | 0.973404  | 0.848734  |
| H | -4.111203 | 0.915792  | 1.872780  |
| H | -4.357288 | 1.669700  | 0.292044  |
| H | -4.846731 | -0.678270 | -0.010367 |
| H | -2.232169 | -1.181460 | 1.489954  |
| O | -1.440007 | -1.907610 | -1.631770 |
| C | 1.477435  | -0.724514 | -0.197333 |
| H | 0.434325  | -0.512230 | -0.404298 |
| C | 2.307776  | 0.291643  | 0.269523  |
| C | 3.669201  | 0.052161  | 0.521959  |
| O | 4.482711  | 1.044062  | 0.982494  |
| H | 3.936738  | 1.835950  | 1.118614  |
| C | 4.174158  | -1.229711 | 0.302611  |
| H | 5.225996  | -1.418339 | 0.506611  |

Sum of electronic and zero-point Energies= -1151.065972  
Sum of electronic and thermal Energies= -1151.043270  
Sum of electronic and thermal Enthalpies= -1151.042326  
Sum of electronic and thermal Free Energies= -1151.117783

#### myricatomentogenin-2-E2 (dmf)

|   |           |           |           |
|---|-----------|-----------|-----------|
| C | -1.787300 | 2.023041  | 0.231732  |
| O | -2.527179 | 2.383466  | 1.316246  |
| H | -1.897200 | 2.729636  | 1.973775  |
| C | -2.404358 | 1.411133  | -0.867534 |
| C | -1.607017 | 1.127909  | -1.987255 |
| H | -2.073386 | 0.693981  | -2.869941 |
| C | -0.226021 | 1.299490  | -1.959828 |
| H | 0.396433  | 0.997182  | -2.798264 |
| C | 0.388898  | 1.767701  | -0.795698 |
| O | 1.774658  | 1.690620  | -0.681292 |
| C | -0.385679 | 2.202414  | 0.285245  |
| O | 0.061564  | 2.802968  | 1.436478  |
| C | 1.159363  | 2.226572  | 2.167657  |
| H | 1.111230  | 2.669912  | 3.166932  |
| H | 1.052154  | 1.138147  | 2.245435  |
| H | 2.117519  | 2.478658  | 1.703308  |
| C | 3.471142  | -2.021015 | 0.176143  |
| H | 3.955073  | -2.967703 | 0.410955  |
| C | 2.072640  | -1.955253 | 0.103094  |
| C | 1.221977  | -3.200636 | 0.303441  |
| H | 1.819890  | -3.934777 | 0.857125  |
| H | 1.011993  | -3.654270 | -0.676544 |
| C | -0.126564 | -3.013712 | 1.027577  |
| H | -0.088328 | -2.203436 | 1.771091  |
| H | -0.359618 | -3.917429 | 1.612741  |
| C | -1.345532 | -2.790254 | 0.134923  |
| C | -2.678993 | -2.573129 | 0.849432  |
| H | -2.585890 | -2.886477 | 1.896374  |
| H | -3.428946 | -3.218598 | 0.371522  |
| C | -3.148781 | -1.094590 | 0.798941  |
| H | -3.880552 | -0.938954 | 1.603575  |
| C | -3.770425 | -0.671663 | -0.545420 |
| H | -3.203074 | -1.129060 | -1.365747 |
| C | -3.813199 | 0.863744  | -0.778426 |
| H | -4.371754 | 1.354641  | 0.026670  |
| H | -4.353416 | 1.057906  | -1.715127 |
| H | -4.792774 | -1.072676 | -0.611058 |
| H | -2.293304 | -0.451296 | 1.042055  |
| O | -1.268944 | -2.803176 | -1.082988 |
| C | 1.487368  | -0.714916 | -0.194994 |

|   |          |           |           |
|---|----------|-----------|-----------|
| H | 0.409409 | -0.633064 | -0.262151 |
| C | 2.274169 | 0.415267  | -0.414802 |
| C | 3.674840 | 0.339610  | -0.345007 |
| O | 4.449641 | 1.443083  | -0.548697 |
| H | 3.861586 | 2.188010  | -0.754687 |
| C | 4.264442 | -0.889986 | -0.048879 |
| H | 5.349203 | -0.946375 | 0.011932  |

Sum of electronic and zero-point Energies= -1151.062284

Sum of electronic and thermal Energies= -1151.039601

Sum of electronic and thermal Enthalpies= -1151.038656

Sum of electronic and thermal Free Energies= -1151.113894

myricatomentogenin-3-TS (dmf)

|   |           |           |           |
|---|-----------|-----------|-----------|
| C | 0.215265  | 2.922966  | -0.213750 |
| O | 0.288294  | 4.261491  | -0.448899 |
| H | -0.622441 | 4.602645  | -0.386251 |
| C | 1.381960  | 2.130608  | -0.255527 |
| C | 1.165580  | 0.793136  | -0.001838 |
| H | 1.995221  | 0.129290  | 0.043643  |
| C | -0.056736 | 0.218683  | 0.198620  |
| H | -0.052374 | -0.842027 | 0.287204  |
| C | -1.213004 | 0.973999  | 0.277261  |
| O | -2.449678 | 0.359407  | 0.566182  |
| C | -1.067841 | 2.360216  | 0.075168  |
| O | -2.122193 | 3.251827  | 0.064792  |
| C | -2.775422 | 3.439329  | 1.335028  |
| H | -3.269002 | 2.516204  | 1.660076  |
| H | -2.056697 | 3.763527  | 2.099836  |
| H | -3.524948 | 4.221254  | 1.178973  |
| C | -1.605404 | -3.514956 | -0.615809 |
| H | -1.244507 | -4.436082 | -1.071560 |
| C | -0.958831 | -3.003324 | 0.525051  |
| C | 0.454193  | -3.446256 | 0.917426  |
| H | 0.523116  | -4.541003 | 0.917022  |
| H | 0.685233  | -3.108730 | 1.934804  |
| C | 1.573531  | -2.892936 | -0.052172 |
| H | 1.138011  | -2.422860 | -0.945745 |
| H | 2.159113  | -3.735832 | -0.449193 |
| C | 2.618571  | -1.914150 | 0.531242  |
| C | 3.755282  | -1.399206 | -0.408173 |
| H | 3.881854  | -2.141874 | -1.207007 |
| H | 4.657817  | -1.438251 | 0.216537  |
| C | 3.741326  | 0.008040  | -1.131614 |
| H | 4.627707  | -0.024887 | -1.778484 |
| C | 3.829105  | 1.322064  | -0.263615 |
| H | 4.837919  | 1.736615  | -0.385464 |
| C | 2.828457  | 2.490464  | -0.571166 |
| H | 3.150573  | 3.370553  | 0.003649  |
| H | 2.918045  | 2.781405  | -1.630008 |
| H | 3.743574  | 1.069950  | 0.802149  |
| H | 2.888225  | 0.050950  | -1.818863 |
| O | 2.627453  | -1.626295 | 1.715109  |
| C | -1.504252 | -1.840416 | 1.095464  |
| H | -1.048951 | -1.418561 | 1.988009  |
| C | -2.394730 | -1.041646 | 0.364840  |
| C | -3.007597 | -1.543516 | -0.789167 |
| O | -3.868452 | -0.790881 | -1.524549 |
| H | -3.923038 | 0.086710  | -1.109378 |
| C | -2.665233 | -2.834479 | -1.221266 |
| H | -3.153158 | -3.235111 | -2.107049 |

Sum of electronic and zero-point Energies= -1150.991331

Sum of electronic and thermal Energies= -1150.969612

Sum of electronic and thermal Enthalpies= -1150.968668

Sum of electronic and thermal Free Energies= -1151.040367

myricatomentogenin-3-E1 (dmf)

|   |          |          |           |
|---|----------|----------|-----------|
| C | 1.414931 | 2.011275 | -0.420506 |
| O | 1.966037 | 2.266058 | -1.639391 |
| H | 1.223142 | 2.384322 | -2.258259 |
| C | 2.235138 | 1.689531 | 0.672552  |

|   |           |           |           |
|---|-----------|-----------|-----------|
| C | 1.616630  | 1.507718  | 1.918216  |
| H | 2.239191  | 1.297050  | 2.786176  |
| C | 0.227410  | 1.490176  | 2.058136  |
| H | -0.243067 | 1.261105  | 3.010917  |
| C | -0.567342 | 1.655359  | 0.924615  |
| O | -1.928560 | 1.370630  | 0.982800  |
| C | 0.012608  | 1.985764  | -0.304139 |
| O | -0.688638 | 2.145288  | -1.476866 |
| C | -1.650044 | 3.217015  | -1.506307 |
| H | -2.525290 | 2.976136  | -0.893929 |
| H | -1.199169 | 4.154855  | -1.157053 |
| H | -1.954069 | 3.320328  | -2.552106 |
| C | -3.122202 | -2.381900 | -0.384429 |
| H | -3.470764 | -3.343286 | -0.758056 |
| C | -1.775306 | -2.222009 | -0.031428 |
| C | -0.792665 | -3.377374 | -0.133877 |
| H | -1.302758 | -4.216341 | -0.622077 |
| H | -0.525070 | -3.721271 | 0.875688  |
| C | 0.520317  | -3.092294 | -0.894695 |
| H | 0.375971  | -2.358919 | -1.702365 |
| H | 0.859738  | -4.007262 | -1.405752 |
| C | 1.707548  | -2.641429 | -0.048157 |
| C | 3.000124  | -2.338516 | -0.803385 |
| H | 2.941166  | -2.763632 | -1.812567 |
| H | 3.828367  | -2.833421 | -0.277749 |
| C | 3.272891  | -0.813854 | -0.904022 |
| H | 3.955930  | -0.640070 | -1.746754 |
| C | 3.871884  | -0.193150 | 0.372571  |
| H | 4.943754  | -0.436444 | 0.419736  |
| C | 3.697486  | 1.346509  | 0.484455  |
| H | 4.276689  | 1.700435  | 1.347835  |
| H | 4.105515  | 1.839651  | -0.405736 |
| H | 3.407834  | -0.655520 | 1.253005  |
| H | 2.335189  | -0.311681 | -1.171167 |
| O | 1.639193  | -2.536355 | 1.166362  |
| C | -1.363187 | -0.965416 | 0.441736  |
| H | -0.331612 | -0.816982 | 0.740765  |
| C | -2.265376 | 0.091400  | 0.539448  |
| C | -3.617457 | -0.080727 | 0.199025  |
| O | -4.506520 | 0.948632  | 0.305264  |
| H | -4.031485 | 1.718361  | 0.658877  |
| C | -4.036729 | -1.328393 | -0.262748 |
| H | -5.081242 | -1.459555 | -0.537142 |

Sum of electronic and zero-point Energies= -1151.065652

Sum of electronic and thermal Energies= -1151.042960

Sum of electronic and thermal Enthalpies= -1151.042016

Sum of electronic and thermal Free Energies= -1151.116982

myricatomentogenin-3-E2 (dmf)

|   |           |           |           |
|---|-----------|-----------|-----------|
| C | 1.867883  | 1.965583  | 0.193202  |
| O | 2.712509  | 2.280767  | 1.212068  |
| H | 2.164128  | 2.693350  | 1.903863  |
| C | 2.367351  | 1.331352  | -0.956166 |
| C | 1.468722  | 1.093575  | -2.005646 |
| H | 1.842158  | 0.655160  | -2.928915 |
| C | 0.101150  | 1.326825  | -1.865125 |
| H | -0.598509 | 1.056927  | -2.652214 |
| C | -0.391252 | 1.821057  | -0.656478 |
| O | -1.764394 | 1.812278  | -0.419216 |
| C | 0.489775  | 2.217264  | 0.355546  |
| O | 0.134749  | 2.842444  | 1.529673  |
| C | -0.691303 | 2.114956  | 2.460629  |
| H | -1.725617 | 2.056259  | 2.108178  |
| H | -0.294481 | 1.106737  | 2.632277  |
| H | -0.656689 | 2.685038  | 3.394043  |
| C | -3.503258 | -1.953580 | 0.017754  |
| H | -3.989245 | -2.923340 | 0.111778  |
| C | -2.145339 | -1.823771 | 0.343200  |
| C | -1.335622 | -3.006518 | 0.849663  |
| H | -1.971886 | -3.898710 | 0.807954  |

|   |           |           |           |
|---|-----------|-----------|-----------|
| H | -1.084937 | -2.852951 | 1.909144  |
| C | -0.022757 | -3.309890 | 0.094833  |
| H | -0.104899 | -3.078200 | -0.977942 |
| H | 0.182861  | -4.391474 | 0.131863  |
| C | 1.240883  | -2.641582 | 0.629891  |
| C | 2.535921  | -2.947662 | -0.120467 |
| H | 2.387248  | -3.825754 | -0.760320 |
| H | 3.308562  | -3.198248 | 0.619428  |
| C | 3.007018  | -1.753081 | -0.992946 |
| H | 3.672466  | -2.141267 | -1.776443 |
| C | 3.734991  | -0.639250 | -0.216824 |
| H | 4.769588  | -0.957191 | -0.020917 |
| C | 3.755039  | 0.731954  | -0.951070 |
| H | 4.464960  | 1.395986  | -0.443429 |
| H | 4.111472  | 0.597717  | -1.981589 |
| H | 3.260842  | -0.501381 | 0.762668  |
| H | 2.133589  | -1.342635 | -1.515924 |
| O | 1.229677  | -1.912236 | 1.609276  |
| C | -1.556777 | -0.557547 | 0.204640  |
| H | -0.511554 | -0.423556 | 0.460109  |
| C | -2.295754 | 0.529847  | -0.256848 |
| C | -3.656686 | 0.394807  | -0.574611 |
| O | -4.383907 | 1.455444  | -1.025097 |
| H | -3.782840 | 2.214944  | -1.102747 |
| C | -4.253478 | -0.859023 | -0.428383 |
| H | -5.305357 | -0.968873 | -0.683249 |

Sum of electronic and zero-point Energies= -1151.063290

Sum of electronic and thermal Energies= -1151.040706

Sum of electronic and thermal Enthalpies= -1151.039762

Sum of electronic and thermal Free Energies= -1151.114161

#### myricatomentogenin-4-TS (dmf)

|   |           |           |           |
|---|-----------|-----------|-----------|
| C | 0.689332  | 2.905077  | -0.118355 |
| O | 0.931597  | 4.235597  | 0.036856  |
| H | 0.077000  | 4.687346  | -0.084687 |
| C | 1.734583  | 1.972222  | 0.015878  |
| C | 1.357495  | 0.660472  | -0.178073 |
| H | 2.106385  | -0.091443 | -0.149764 |
| C | 0.080873  | 0.236998  | -0.410973 |
| H | -0.053977 | -0.819358 | -0.466887 |
| C | -0.967713 | 1.130993  | -0.561404 |
| O | -2.265191 | 0.657208  | -0.857613 |
| C | -0.651287 | 2.497166  | -0.421850 |
| O | -1.528439 | 3.547392  | -0.587440 |
| C | -2.772521 | 3.497992  | 0.129980  |
| H | -3.146749 | 4.526110  | 0.161204  |
| H | -3.499846 | 2.867789  | -0.395018 |
| H | -2.622442 | 3.134161  | 1.155003  |
| C | -2.109877 | -3.180002 | 0.709885  |
| H | -1.934285 | -4.109408 | 1.250068  |
| C | -1.356196 | -2.893897 | -0.443980 |
| C | -0.066712 | -3.654151 | -0.758587 |
| H | 0.256643  | -3.452736 | -1.786868 |
| H | -0.240144 | -4.734585 | -0.680331 |
| C | 1.113831  | -3.290374 | 0.221097  |
| H | 1.647247  | -4.217527 | 0.485862  |
| H | 0.724340  | -2.905561 | 1.171342  |
| C | 2.226238  | -2.344984 | -0.287823 |
| C | 3.140077  | -1.698940 | 0.790724  |
| H | 3.775717  | -2.529251 | 1.138018  |
| H | 2.519481  | -1.440620 | 1.658233  |
| C | 4.061192  | -0.488761 | 0.373532  |
| H | 5.092929  | -0.789286 | 0.591055  |
| C | 3.833206  | 0.899985  | 1.103348  |
| H | 3.254210  | 0.721494  | 2.021047  |
| C | 3.203829  | 2.145210  | 0.374631  |
| H | 3.339324  | 3.009270  | 1.039182  |
| H | 3.791611  | 2.372721  | -0.529435 |
| H | 4.821210  | 1.239468  | 1.440829  |
| H | 4.022269  | -0.369988 | -0.717409 |

|   |           |           |           |
|---|-----------|-----------|-----------|
| O | 2.418503  | -2.173040 | -1.477212 |
| C | -1.663736 | -1.706284 | -1.126711 |
| H | -1.129965 | -1.458968 | -2.040872 |
| C | -2.425021 | -0.704306 | -0.507596 |
| C | -3.149213 | -0.989823 | 0.656352  |
| O | -3.901195 | -0.047814 | 1.285829  |
| H | -3.825651 | 0.781192  | 0.784925  |
| C | -3.044602 | -2.273530 | 1.213766  |
| H | -3.620174 | -2.501959 | 2.108089  |

Sum of electronic and zero-point Energies= -1150.997825

Sum of electronic and thermal Energies= -1150.976102

Sum of electronic and thermal Enthalpies= -1150.975158

Sum of electronic and thermal Free Energies= -1151.046595

#### myricatomentogenin-4-E1 (dmf)

|   |           |           |           |
|---|-----------|-----------|-----------|
| C | 1.776421  | 1.591511  | -0.521704 |
| O | 2.361346  | 1.631433  | -1.751011 |
| H | 1.641242  | 1.761015  | -2.394270 |
| C | 2.549564  | 1.331191  | 0.622190  |
| C | 1.897533  | 1.350558  | 1.863753  |
| H | 2.483398  | 1.186187  | 2.766560  |
| C | 0.512416  | 1.503020  | 1.970935  |
| H | 0.009388  | 1.447537  | 2.932936  |
| C | -0.245586 | 1.660439  | 0.810950  |
| O | -1.634728 | 1.641206  | 0.879379  |
| C | 0.382774  | 1.763800  | -0.434014 |
| O | -0.288777 | 1.896797  | -1.627306 |
| C | -1.033418 | 3.119026  | -1.798103 |
| H | -1.384998 | 3.114433  | -2.833908 |
| H | -1.891958 | 3.154393  | -1.118929 |
| H | -0.389980 | 3.992344  | -1.629113 |
| C | -3.620931 | -1.866402 | -0.179742 |
| H | -4.176729 | -2.762968 | -0.449923 |
| C | -2.223826 | -1.923070 | -0.063643 |
| C | -1.467389 | -3.212237 | -0.351340 |
| H | -1.326693 | -3.320046 | -1.437027 |
| H | -2.091598 | -4.060189 | -0.041550 |
| C | -0.084054 | -3.341678 | 0.313031  |
| H | 0.204353  | -4.405003 | 0.318591  |
| H | -0.112218 | -3.031864 | 1.365207  |
| C | 1.058547  | -2.627754 | -0.417446 |
| C | 2.171510  | -2.077665 | 0.461785  |
| H | 2.481909  | -2.876405 | 1.154070  |
| H | 1.702321  | -1.321963 | 1.109669  |
| C | 3.383365  | -1.487214 | -0.275402 |
| H | 3.988818  | -2.315051 | -0.668792 |
| C | 4.265465  | -0.582334 | 0.622787  |
| H | 4.141679  | -0.880194 | 1.674170  |
| C | 4.008376  | 0.945203  | 0.495009  |
| H | 4.596399  | 1.457861  | 1.269019  |
| H | 4.389778  | 1.287965  | -0.473351 |
| H | 5.325526  | -0.748700 | 0.386276  |
| H | 3.037610  | -0.928070 | -1.152860 |
| O | 1.067806  | -2.527736 | -1.632249 |
| C | -1.550598 | -0.747621 | 0.296189  |
| H | -0.473831 | -0.745354 | 0.406629  |
| C | -2.241149 | 0.441610  | 0.514781  |
| C | -3.637909 | 0.492911  | 0.391981  |
| O | -4.324878 | 1.651567  | 0.607105  |
| H | -3.683738 | 2.340655  | 0.846168  |
| C | -4.319991 | -0.675740 | 0.045870  |
| H | -5.403574 | -0.638053 | -0.044116 |

Sum of electronic and zero-point Energies= -1151.067176

Sum of electronic and thermal Energies= -1151.044495

Sum of electronic and thermal Enthalpies= -1151.043551

Sum of electronic and thermal Free Energies= -1151.118251

#### myricatomentogenin-4-E2 (dmf)

|   |          |          |          |
|---|----------|----------|----------|
| C | 2.121786 | 1.730178 | 0.165281 |
| O | 2.983447 | 2.094768 | 1.153830 |

|                                                           |           |           |           |
|-----------------------------------------------------------|-----------|-----------|-----------|
| H                                                         | 2.454968  | 2.575816  | 1.815878  |
| C                                                         | 2.589743  | 0.972714  | -0.918806 |
| C                                                         | 1.675813  | 0.666521  | -1.937565 |
| H                                                         | 2.025160  | 0.117989  | -2.809909 |
| C                                                         | 0.327394  | 1.001874  | -1.837286 |
| H                                                         | -0.382895 | 0.706979  | -2.605526 |
| C                                                         | -0.139326 | 1.664121  | -0.699545 |
| O                                                         | -1.509207 | 1.845858  | -0.521630 |
| C                                                         | 0.758419  | 2.079064  | 0.291875  |
| O                                                         | 0.462534  | 2.828080  | 1.404103  |
| C                                                         | -0.634687 | 2.432064  | 2.248001  |
| H                                                         | -0.467066 | 2.934952  | 3.205413  |
| H                                                         | -1.591207 | 2.756258  | 1.827200  |
| H                                                         | -0.640671 | 1.346123  | 2.402328  |
| C                                                         | -3.824263 | -1.568549 | 0.090463  |
| H                                                         | -4.460192 | -2.440305 | 0.237177  |
| C                                                         | -2.442743 | -1.667620 | 0.322531  |
| C                                                         | -1.812465 | -2.989846 | 0.739044  |
| H                                                         | -1.790330 | -3.668100 | -0.126334 |
| H                                                         | -2.462097 | -3.470958 | 1.482175  |
| C                                                         | -0.385027 | -2.908218 | 1.308565  |
| H                                                         | -0.164141 | -3.851446 | 1.833589  |
| H                                                         | -0.296692 | -2.118073 | 2.064975  |
| C                                                         | 0.729614  | -2.768174 | 0.265428  |
| C                                                         | 1.954999  | -1.975140 | 0.699138  |
| H                                                         | 2.252690  | -2.326822 | 1.699390  |
| H                                                         | 1.603909  | -0.945063 | 0.864310  |
| C                                                         | 3.147552  | -1.993649 | -0.269415 |
| H                                                         | 3.656118  | -2.962895 | -0.176208 |
| C                                                         | 4.164575  | -0.850816 | -0.024241 |
| H                                                         | 4.126216  | -0.540408 | 1.028958  |
| C                                                         | 3.989176  | 0.400194  | -0.929932 |
| H                                                         | 4.719613  | 1.157578  | -0.615671 |
| H                                                         | 4.240443  | 0.121015  | -1.962005 |
| H                                                         | 5.183451  | -1.225739 | -0.193553 |
| H                                                         | 2.773527  | -1.952184 | -1.300099 |
| O                                                         | 0.632399  | -3.279702 | -0.836476 |
| C                                                         | -1.667838 | -0.518667 | 0.126567  |
| H                                                         | -0.601036 | -0.540649 | 0.306221  |
| C                                                         | -2.238406 | 0.675595  | -0.310960 |
| C                                                         | -3.617626 | 0.767689  | -0.542631 |
| O                                                         | -4.190792 | 1.930732  | -0.963118 |
| H                                                         | -3.483154 | 2.584101  | -1.089502 |
| C                                                         | -4.404708 | -0.368817 | -0.331792 |
| H                                                         | -5.475564 | -0.299164 | -0.510801 |
| Sum of electronic and zero-point Energies= -1151.065801   |           |           |           |
| Sum of electronic and thermal Energies= -1151.043066      |           |           |           |
| Sum of electronic and thermal Enthalpies= -1151.042122    |           |           |           |
| Sum of electronic and thermal Free Energies= -1151.117575 |           |           |           |

myricatomentogenin-5-TS (dmf)

|   |           |           |           |
|---|-----------|-----------|-----------|
| C | -2.806066 | 1.209788  | -0.160944 |
| O | -4.057459 | 1.715951  | 0.015359  |
| H | -4.667289 | 0.956292  | 0.000550  |
| C | -1.686097 | 2.063860  | -0.179212 |
| C | -0.485302 | 1.415533  | -0.372442 |
| H | 0.399447  | 1.995035  | -0.483990 |
| C | -0.326725 | 0.063338  | -0.411290 |
| H | 0.679542  | -0.282538 | -0.403745 |
| C | -1.406745 | -0.800008 | -0.475879 |
| O | -1.173614 | -2.176461 | -0.702903 |
| C | -2.679218 | -0.210184 | -0.348417 |
| O | -3.883502 | -0.876976 | -0.406494 |
| C | -4.022153 | -2.049868 | 0.413895  |
| H | -3.648870 | -1.864107 | 1.429681  |
| H | -5.093855 | -2.267747 | 0.451736  |
| H | -3.494499 | -2.901795 | -0.029763 |
| C | 2.800266  | -2.334739 | 0.438833  |
| H | 3.792715  | -2.203363 | 0.866215  |
| C | 2.481906  | -1.703335 | -0.776988 |

|   |           |           |           |
|---|-----------|-----------|-----------|
| C | 3.368405  | -0.597473 | -1.355477 |
| H | 3.469371  | -0.728300 | -2.441325 |
| H | 4.373493  | -0.677951 | -0.926788 |
| C | 2.870055  | 0.884822  | -1.147112 |
| H | 1.861443  | 1.019211  | -1.544399 |
| H | 3.510617  | 1.517349  | -1.783915 |
| C | 3.030981  | 1.493235  | 0.263139  |
| C | 2.042697  | 2.508334  | 0.932191  |
| H | 2.633111  | 2.927340  | 1.755196  |
| H | 1.315545  | 1.842838  | 1.421036  |
| C | 1.263540  | 3.687819  | 0.229622  |
| H | 1.853355  | 4.595461  | 0.409292  |
| C | -0.194522 | 3.969314  | 0.796844  |
| H | -0.247279 | 3.546220  | 1.810440  |
| C | -1.520658 | 3.563278  | 0.040178  |
| H | -2.354826 | 3.968975  | 0.627489  |
| H | -1.554835 | 4.088150  | -0.928039 |
| H | -0.271822 | 5.056790  | 0.928002  |
| H | 1.246084  | 3.582194  | -0.862776 |
| O | 3.980589  | 1.136788  | 0.940219  |
| C | 1.196816  | -1.941454 | -1.300919 |
| H | 0.898070  | -1.457744 | -2.228707 |
| C | 0.192868  | -2.502596 | -0.497872 |
| C | 0.520557  | -3.107531 | 0.722494  |
| O | -0.430114 | -3.646048 | 1.530959  |
| H | -1.294422 | -3.512379 | 1.106831  |
| C | 1.857876  | -3.088478 | 1.143511  |
| H | 2.116841  | -3.567893 | 2.084923  |

Sum of electronic and zero-point Energies= -1150.979512

Sum of electronic and thermal Energies= -1150.957959

Sum of electronic and thermal Enthalpies= -1150.957014

Sum of electronic and thermal Free Energies= -1151.028600

myricatomentogenin-5-E1 (dmf)

|   |           |           |           |
|---|-----------|-----------|-----------|
| C | 1.628452  | 1.840973  | -0.563739 |
| O | 2.145893  | 2.005246  | -1.812614 |
| H | 1.391929  | 2.192517  | -2.400232 |
| C | 2.460906  | 1.477926  | 0.507713  |
| C | 1.874476  | 1.374482  | 1.778200  |
| H | 2.507366  | 1.135931  | 2.631208  |
| C | 0.493160  | 1.469540  | 1.964698  |
| H | 0.040054  | 1.290653  | 2.936515  |
| C | -0.326168 | 1.703814  | 0.860333  |
| O | -1.704490 | 1.548065  | 0.973629  |
| C | 0.237512  | 1.973045  | -0.390581 |
| O | -0.492406 | 2.195176  | -1.534575 |
| C | -1.346421 | 3.355862  | -1.525990 |
| H | -0.772482 | 4.256908  | -1.273097 |
| H | -1.742755 | 3.443868  | -2.541725 |
| H | -2.172409 | 3.230921  | -0.817751 |
| C | -3.347570 | -2.022972 | -0.426601 |
| H | -3.816319 | -2.935747 | -0.791620 |
| C | -1.955112 | -1.867331 | -0.521146 |
| C | -1.094110 | -2.944667 | -1.172771 |
| H | -1.456942 | -3.100432 | -2.198650 |
| H | -1.243353 | -3.901483 | -0.654535 |
| C | 0.423829  | -2.670901 | -1.234209 |
| H | 0.638977  | -1.659329 | -1.594463 |
| H | 0.861043  | -3.356718 | -1.975871 |
| C | 1.157022  | -2.973156 | 0.076673  |
| C | 2.166854  | -1.980150 | 0.639744  |
| H | 2.642332  | -2.472691 | 1.497439  |
| H | 1.569997  | -1.150744 | 1.046898  |
| C | 3.252405  | -1.404457 | -0.296456 |
| H | 3.845523  | -2.238548 | -0.695709 |
| C | 4.199881  | -0.417987 | 0.441706  |
| H | 4.199007  | -0.659861 | 1.513892  |
| C | 3.906908  | 1.098187  | 0.264121  |
| H | 4.563354  | 1.650518  | 0.951720  |
| H | 4.189809  | 1.399155  | -0.750142 |

|   |           |           |           |
|---|-----------|-----------|-----------|
| H | 5.230742  | -0.582909 | 0.099287  |
| H | 2.795572  | -0.909928 | -1.163960 |
| O | 0.904131  | -4.001293 | 0.683699  |
| C | -1.400574 | -0.677477 | -0.036776 |
| H | -0.333222 | -0.516742 | -0.092648 |
| C | -2.198598 | 0.333404  | 0.496430  |
| C | -3.588352 | 0.174316  | 0.583508  |
| O | -4.384183 | 1.152867  | 1.102974  |
| H | -3.814094 | 1.888194  | 1.380774  |
| C | -4.152013 | -1.019102 | 0.121358  |
| H | -5.230600 | -1.144120 | 0.190466  |

Sum of electronic and zero-point Energies= -1151.058671  
Sum of electronic and thermal Energies= -1151.035920  
Sum of electronic and thermal Enthalpies= -1151.034976  
Sum of electronic and thermal Free Energies= -1151.110862

#### myricatomentogenin-5-E2 (dmf)

|   |           |           |           |
|---|-----------|-----------|-----------|
| C | -2.065280 | -1.723790 | 0.202202  |
| O | -2.872204 | -1.940137 | 1.275748  |
| H | -2.310222 | -2.332113 | 1.968529  |
| C | -2.583368 | -1.090203 | -0.938041 |
| C | -1.737788 | -0.966175 | -2.049059 |
| H | -2.131218 | -0.525959 | -2.963193 |
| C | -0.391533 | -1.324743 | -1.987873 |
| H | 0.274986  | -1.149264 | -2.828478 |
| C | 0.142022  | -1.803301 | -0.789949 |
| O | 1.524511  | -1.901871 | -0.646573 |
| C | -0.699702 | -2.070584 | 0.298276  |
| O | -0.344299 | -2.661604 | 1.485874  |
| C | 0.780248  | -2.147954 | 2.224441  |
| H | 0.774928  | -1.051482 | 2.238020  |
| H | 0.660478  | -2.525756 | 3.244428  |
| H | 1.723991  | -2.514946 | 1.809623  |
| C | 3.644298  | 1.643070  | -0.025759 |
| H | 4.232421  | 2.543224  | 0.147152  |
| C | 2.268881  | 1.745967  | -0.288067 |
| C | 1.584457  | 3.106432  | -0.374271 |
| H | 2.002810  | 3.654337  | -1.231130 |
| H | 1.838812  | 3.699988  | 0.513734  |
| C | 0.046486  | 3.098703  | -0.517428 |
| H | -0.282820 | 2.441045  | -1.328925 |
| H | -0.267671 | 4.114208  | -0.802060 |
| C | -0.690523 | 2.790524  | 0.790413  |
| C | -1.808015 | 1.753744  | 0.811023  |
| H | -2.208814 | 1.747427  | 1.832465  |
| H | -1.320494 | 0.781594  | 0.652573  |
| C | -2.967779 | 1.907634  | -0.199241 |
| H | -3.427660 | 2.894286  | -0.049874 |
| C | -4.059812 | 0.818027  | -0.023332 |
| H | -4.083608 | 0.503812  | 1.028109  |
| C | -3.950682 | -0.444145 | -0.925967 |
| H | -4.717860 | -1.157998 | -0.594796 |
| H | -4.203728 | -0.163444 | -1.956917 |
| H | -5.042513 | 1.264259  | -0.229485 |
| H | -2.586038 | 1.898532  | -1.229448 |
| O | -0.356067 | 3.358620  | 1.817280  |
| C | 1.558257  | 0.559636  | -0.500905 |
| H | 0.501067  | 0.598541  | -0.716222 |
| C | 2.185609  | -0.684799 | -0.463843 |
| C | 3.559463  | -0.780432 | -0.202866 |
| O | 4.188365  | -1.989655 | -0.146845 |
| H | 3.530937  | -2.679635 | -0.333512 |
| C | 4.280410  | 0.398062  | 0.014305  |
| H | 5.345882  | 0.322483  | 0.221191  |

Sum of electronic and zero-point Energies= -1151.057028  
Sum of electronic and thermal Energies= -1151.034407  
Sum of electronic and thermal Enthalpies= -1151.033463  
Sum of electronic and thermal Free Energies= -1151.108641

#### myricatomentogenin-6-TS (dmf)

|   |           |           |           |
|---|-----------|-----------|-----------|
| C | 1.022617  | 2.803055  | -0.048465 |
| O | 1.433803  | 4.090355  | 0.114349  |
| H | 0.647204  | 4.649840  | -0.017790 |
| C | 1.944861  | 1.743297  | 0.052614  |
| C | 1.396683  | 0.494050  | -0.131182 |
| H | 2.052930  | -0.340254 | -0.165786 |
| C | 0.066522  | 0.233963  | -0.295289 |
| H | -0.207433 | -0.796584 | -0.305124 |
| C | -0.853012 | 1.255224  | -0.472040 |
| O | -2.192451 | 0.953922  | -0.802049 |
| C | -0.359481 | 2.570322  | -0.348679 |
| O | -1.097268 | 3.721524  | -0.525740 |
| C | -2.324939 | 3.837957  | 0.213019  |
| H | -2.582129 | 4.901778  | 0.209295  |
| H | -3.128059 | 3.271993  | -0.273299 |
| H | -2.195929 | 3.495738  | 1.248249  |
| C | -2.509471 | -2.959490 | 0.529038  |
| H | -2.454414 | -3.929039 | 1.022330  |
| C | -1.666642 | -2.686971 | -0.565475 |
| C | -0.425362 | -3.538579 | -0.844258 |
| H | -0.004309 | -3.294826 | -1.827267 |
| H | -0.694260 | -4.601873 | -0.865923 |
| C | 0.699209  | -3.353420 | 0.251053  |
| H | 1.087449  | -4.349736 | 0.516366  |
| H | 0.270464  | -2.957068 | 1.178725  |
| C | 1.972906  | -2.547261 | -0.109699 |
| C | 2.721946  | -1.895161 | 1.077196  |
| H | 3.061149  | -2.744277 | 1.695536  |
| H | 1.976676  | -1.388557 | 1.703185  |
| C | 3.993221  | -0.995564 | 0.860897  |
| H | 4.340925  | -0.771587 | 1.879999  |
| C | 4.119463  | 0.340774  | 0.023764  |
| H | 5.197734  | 0.550023  | 0.063923  |
| C | 3.429280  | 1.705947  | 0.389841  |
| H | 3.976158  | 2.496905  | -0.142780 |
| H | 3.574306  | 1.918681  | 1.461299  |
| H | 3.907637  | 0.123719  | -1.031733 |
| H | 4.764020  | -1.648816 | 0.428767  |
| O | 2.385611  | -2.488984 | -1.253920 |
| C | -1.823039 | -1.440488 | -1.192787 |
| H | -1.211533 | -1.196601 | -2.057626 |
| C | -2.512620 | -0.401421 | -0.550319 |
| C | -3.319410 | -0.674117 | 0.560383  |
| O | -3.997039 | 0.306813  | 1.213745  |
| H | -3.796083 | 1.151722  | 0.777653  |
| C | -3.376806 | -1.992120 | 1.040430  |
| H | -4.019295 | -2.210192 | 1.890657  |

Sum of electronic and zero-point Energies= -1150.990111  
Sum of electronic and thermal Energies= -1150.968425  
Sum of electronic and thermal Enthalpies= -1150.967480  
Sum of electronic and thermal Free Energies= -1151.039058

#### myricatomentogenin-6-E1 (dmf)

|   |           |           |           |
|---|-----------|-----------|-----------|
| C | 1.576238  | 1.879824  | -0.341795 |
| O | 2.244728  | 2.193036  | -1.484752 |
| H | 1.570610  | 2.456312  | -2.136839 |
| C | 2.280517  | 1.372738  | 0.764585  |
| C | 1.557050  | 1.140909  | 1.942155  |
| H | 2.090963  | 0.797702  | 2.826421  |
| C | 0.164738  | 1.255331  | 1.987770  |
| H | -0.395506 | 0.983922  | 2.878963  |
| C | -0.522808 | 1.624422  | 0.833017  |
| O | -1.906675 | 1.479284  | 0.768977  |
| C | 0.175560  | 2.003712  | -0.317393 |
| O | -0.421369 | 2.358791  | -1.503678 |
| C | -1.256432 | 3.532337  | -1.465048 |
| H | -1.535547 | 3.736394  | -2.502936 |
| H | -2.157854 | 3.352245  | -0.869744 |
| H | -0.703890 | 4.388188  | -1.055563 |
| C | -3.343946 | -2.265432 | -0.375337 |



|   |           |           |           |
|---|-----------|-----------|-----------|
| H | -3.757093 | -3.234921 | -0.648864 |
| C | -1.958796 | -2.061241 | -0.420616 |
| C | -0.997367 | -3.157431 | -0.850643 |
| H | -0.659629 | -2.980894 | -1.882537 |
| H | -1.538536 | -4.111228 | -0.861390 |
| C | 0.258839  | -3.300055 | 0.035444  |
| H | 0.630872  | -4.335692 | -0.032108 |
| H | 0.022733  | -3.140479 | 1.095209  |
| C | 1.464632  | -2.441345 | -0.363977 |
| C | 2.435765  | -2.119662 | 0.762623  |
| H | 2.535346  | -3.031928 | 1.371081  |
| H | 1.918516  | -1.405423 | 1.419648  |
| C | 3.838683  | -1.620596 | 0.370605  |
| H | 4.461514  | -1.660743 | 1.277020  |
| C | 4.004870  | -0.226664 | -0.271554 |
| H | 5.050736  | -0.163723 | -0.606690 |
| C | 3.743908  | 1.015214  | 0.627084  |
| H | 4.285218  | 1.863547  | 0.186114  |
| H | 4.175059  | 0.849482  | 1.623977  |
| H | 3.389527  | -0.158517 | -1.174466 |
| H | 4.273883  | -2.354869 | -0.323108 |
| O | 1.639383  | -2.084600 | -1.517021 |
| C | -1.469132 | -0.799409 | -0.051581 |
| H | -0.403928 | -0.606552 | -0.085509 |
| C | -2.328024 | 0.215779  | 0.359153  |
| C | -3.716886 | 0.006629  | 0.397928  |
| O | -4.567213 | 0.993575  | 0.800872  |
| H | -4.034542 | 1.766655  | 1.048853  |
| C | -4.214135 | -1.242319 | 0.023527  |
| H | -5.288926 | -1.406601 | 0.061604  |

Sum of electronic and zero-point Energies= -1151.065188  
Sum of electronic and thermal Energies= -1151.042459  
Sum of electronic and thermal Enthalpies= -1151.041515  
Sum of electronic and thermal Free Energies= -1151.117277

#### myricatomentogenin-6-E2 (dmf)

|   |           |           |           |
|---|-----------|-----------|-----------|
| C | 1.786969  | 1.881665  | 0.245649  |
| O | 2.575244  | 2.184343  | 1.315318  |
| H | 1.981724  | 2.531625  | 2.004952  |
| C | 2.344034  | 1.275408  | -0.886500 |
| C | 1.495965  | 1.036801  | -1.980173 |
| H | 1.915623  | 0.614077  | -2.891028 |
| C | 0.125960  | 1.256993  | -1.898475 |
| H | -0.537426 | 0.990886  | -2.717678 |
| C | -0.432323 | 1.739031  | -0.710525 |
| O | -1.818615 | 1.698648  | -0.557653 |
| C | 0.394555  | 2.119042  | 0.352178  |
| O | 0.027158  | 2.709777  | 1.533760  |
| C | -1.174738 | 2.310012  | 2.215192  |
| H | -1.082621 | 2.716550  | 3.226760  |
| H | -2.061602 | 2.729668  | 1.731173  |
| H | -1.254109 | 1.217818  | 2.267036  |
| C | -3.491805 | -2.076516 | 0.044138  |
| H | -3.965224 | -3.044761 | 0.199257  |
| C | -2.100306 | -1.952492 | 0.172118  |
| C | -1.219080 | -3.151304 | 0.490162  |
| H | -0.957534 | -3.674415 | -0.441780 |
| H | -1.802174 | -3.865298 | 1.085359  |
| C | 0.093226  | -2.832884 | 1.232080  |
| H | 0.427268  | -3.737254 | 1.766442  |
| H | -0.055920 | -2.072093 | 2.009003  |
| C | 1.290495  | -2.453323 | 0.351706  |
| C | 2.358858  | -1.608578 | 1.033224  |
| H | 2.478239  | -2.009431 | 2.051798  |
| H | 1.925254  | -0.609298 | 1.182916  |
| C | 3.741053  | -1.536474 | 0.358081  |
| H | 4.440127  | -1.113208 | 1.094758  |
| C | 3.906726  | -0.760840 | -0.966132 |
| H | 4.919321  | -0.984939 | -1.332837 |
| C | 3.777695  | 0.786099  | -0.914853 |

|   |           |           |           |
|---|-----------|-----------|-----------|
| H | 4.268517  | 1.187223  | -1.813417 |
| H | 4.332403  | 1.177716  | -0.054411 |
| H | 3.214092  | -1.160862 | -1.716231 |
| H | 4.081031  | -2.567155 | 0.180662  |
| O | 1.388657  | -2.852209 | -0.796050 |
| C | -1.538041 | -0.685751 | -0.028939 |
| H | -0.468704 | -0.547828 | 0.068583  |
| C | -2.327070 | 0.414724  | -0.359295 |
| C | -3.717875 | 0.284003  | -0.488253 |
| O | -4.503587 | 1.352716  | -0.803399 |
| H | -3.924885 | 2.120406  | -0.941620 |
| C | -4.290167 | -0.973958 | -0.281020 |
| H | -5.369051 | -1.075586 | -0.377666 |

Sum of electronic and zero-point Energies= -1151.061524  
Sum of electronic and thermal Energies= -1151.038943  
Sum of electronic and thermal Enthalpies= -1151.037999  
Sum of electronic and thermal Free Energies= -1151.112700

#### galeon-1-TS (dmf)

|   |           |           |           |
|---|-----------|-----------|-----------|
| C | 0.438890  | 3.062977  | 0.006503  |
| H | 0.610544  | 4.122897  | 0.174727  |
| C | -0.864873 | 2.530419  | 0.121602  |
| C | -0.981130 | 1.177712  | -0.102245 |
| H | -1.934718 | 0.715030  | -0.057522 |
| C | 0.081198  | 0.364172  | -0.386302 |
| H | -0.150340 | -0.672421 | -0.489976 |
| C | 1.366143  | 0.846723  | -0.511801 |
| O | 2.434480  | -0.027552 | -0.818364 |
| C | 1.552622  | 2.239167  | -0.312750 |
| O | 2.833129  | 2.688737  | -0.428223 |
| C | 3.084010  | 4.077181  | -0.226122 |
| H | 4.160360  | 4.208133  | -0.371236 |
| H | 2.813807  | 4.392102  | 0.791574  |
| H | 2.541403  | 4.695029  | -0.955159 |
| C | 0.975492  | -3.583212 | 0.722101  |
| H | 0.488613  | -4.395780 | 1.259853  |
| C | 0.375897  | -3.061019 | -0.439482 |
| C | -1.096517 | -3.322592 | -0.765255 |
| H | -1.317825 | -4.393464 | -0.677693 |
| H | -1.316852 | -3.030649 | -1.799181 |
| C | -2.078839 | -2.549386 | 0.196535  |
| H | -1.565386 | -2.257400 | 1.121039  |
| H | -2.874801 | -3.237860 | 0.522632  |
| C | 1.076362  | -2.049768 | -1.117108 |
| H | 0.668364  | -1.637990 | -2.037003 |
| C | 2.122742  | -1.363315 | -0.485621 |
| C | 2.692383  | -1.872209 | 0.687742  |
| O | 3.702665  | -1.219425 | 1.321750  |
| H | 3.878268  | -0.402813 | 0.822947  |
| C | 2.156356  | -3.045014 | 1.240704  |
| H | 2.606793  | -3.452281 | 2.143219  |
| C | -2.833599 | -1.317300 | -0.353728 |
| C | -3.557908 | -0.421440 | 0.692071  |
| H | -2.985458 | -0.440078 | 1.627969  |
| H | -4.485315 | -0.973053 | 0.914859  |
| C | -3.934540 | 1.058359  | 0.292715  |
| H | -3.781377 | 1.185640  | -0.787076 |
| C | -3.254137 | 2.237099  | 1.106811  |
| H | -4.066970 | 2.893671  | 1.443487  |
| C | -2.192075 | 3.200739  | 0.459290  |
| H | -2.622421 | 3.652447  | -0.449227 |
| H | -2.040343 | 4.034292  | 1.159667  |
| H | -2.813883 | 1.820318  | 2.024230  |
| H | -5.015975 | 1.158201  | 0.442598  |
| O | -2.916192 | -1.096727 | -1.547498 |

Sum of electronic and zero-point Energies= -1075.787011  
Sum of electronic and thermal Energies= -1075.766460  
Sum of electronic and thermal Enthalpies= -1075.765516  
Sum of electronic and thermal Free Energies= -1075.834915

## galeon-1-E1 (dmf)

|   |           |           |           |
|---|-----------|-----------|-----------|
| C | -1.809646 | 1.647066  | -0.723835 |
| H | -2.285421 | 1.575662  | -1.697289 |
| C | -2.599085 | 1.506965  | 0.430113  |
| C | -1.993368 | 1.643477  | 1.686397  |
| H | -2.592349 | 1.571948  | 2.592295  |
| C | -0.606000 | 1.797226  | 1.785982  |
| H | -0.113332 | 1.833683  | 2.755272  |
| C | 0.175443  | 1.845565  | 0.637414  |
| O | 1.563144  | 1.844558  | 0.741956  |
| C | -0.423280 | 1.825087  | -0.638792 |
| O | 0.416819  | 1.928563  | -1.698474 |
| C | -0.134243 | 1.790203  | -3.008348 |
| H | 0.711635  | 1.879763  | -3.695672 |
| H | -0.862943 | 2.583504  | -3.223178 |
| H | -0.609428 | 0.808445  | -3.138686 |
| C | 3.586381  | -1.718102 | -0.021580 |
| H | 4.151070  | -2.628486 | -0.217074 |
| C | 2.188186  | -1.773885 | 0.078228  |
| C | 1.437683  | -3.082197 | -0.127874 |
| H | 2.054567  | -3.904876 | 0.256094  |
| H | 1.318518  | -3.270056 | -1.205219 |
| C | 0.041594  | -3.163266 | 0.517377  |
| H | 0.052074  | -2.785402 | 1.547467  |
| H | -0.251850 | -4.222993 | 0.588073  |
| C | 1.505085  | -0.578858 | 0.340948  |
| H | 0.427207  | -0.576064 | 0.438100  |
| C | 2.183005  | 0.629684  | 0.477326  |
| C | 3.581421  | 0.679196  | 0.367773  |
| O | 4.256596  | 1.856897  | 0.500770  |
| H | 3.600065  | 2.560919  | 0.630760  |
| C | 4.274890  | -0.507939 | 0.121826  |
| H | 5.359348  | -0.469543 | 0.042429  |
| C | -1.087068 | -2.495870 | -0.276107 |
| C | -2.215835 | -1.896703 | 0.550281  |
| H | -1.762230 | -1.081699 | 1.134463  |
| H | -2.515979 | -2.639625 | 1.305776  |
| C | -3.434451 | -1.389146 | -0.235862 |
| H | -3.092605 | -0.920620 | -1.167107 |
| C | -4.317314 | -0.401677 | 0.567716  |
| H | -5.376146 | -0.585578 | 0.339019  |
| C | -4.053494 | 1.105575  | 0.295779  |
| H | -4.398117 | 1.342841  | -0.719712 |
| H | -4.674867 | 1.691326  | 0.987887  |
| H | -4.202772 | -0.598646 | 1.643490  |
| H | -4.037758 | -2.254600 | -0.541721 |
| O | -1.073824 | -2.465557 | -1.494756 |

Sum of electronic and zero-point Energies= -1075.857843

Sum of electronic and thermal Energies= -1075.836463

Sum of electronic and thermal Enthalpies= -1075.835519

Sum of electronic and thermal Free Energies= -1075.907551

## galeon-1-E2 (dmf)

|   |           |           |           |
|---|-----------|-----------|-----------|
| C | -1.665469 | 1.936674  | 0.499241  |
| H | -2.049523 | 2.165277  | 1.489583  |
| C | -2.556226 | 1.485212  | -0.493374 |
| C | -2.068532 | 1.238283  | -1.780789 |
| H | -2.749799 | 0.923053  | -2.568243 |
| C | -0.695942 | 1.322849  | -2.047771 |
| H | -0.296526 | 1.066298  | -3.026488 |
| C | 0.185386  | 1.662751  | -1.032719 |
| O | 1.560401  | 1.574033  | -1.240038 |
| C | -0.293183 | 2.029496  | 0.244700  |
| O | 0.650045  | 2.405807  | 1.145627  |
| C | 0.223096  | 2.727633  | 2.469279  |
| H | 1.131192  | 2.996709  | 3.015899  |
| H | -0.254671 | 1.866603  | 2.956199  |
| H | -0.469253 | 3.580407  | 2.470066  |
| C | 3.413432  | -1.752695 | 0.453760  |
| H | 3.920258  | -2.596295 | 0.919610  |

|   |           |           |           |
|---|-----------|-----------|-----------|
| C | 2.113375  | -1.914695 | -0.043800 |
| C | 1.365859  | -3.230769 | 0.085057  |
| H | 2.027208  | -3.967895 | 0.556028  |
| H | 1.104844  | -3.626965 | -0.906232 |
| C | 0.061403  | -3.132225 | 0.912142  |
| H | 0.211194  | -2.523704 | 1.812168  |
| H | -0.215945 | -4.139807 | 1.261746  |
| C | 1.495393  | -0.802464 | -0.638804 |
| H | 0.497389  | -0.891634 | -1.055405 |
| C | 2.138464  | 0.429575  | -0.692801 |
| C | 3.436926  | 0.588298  | -0.181059 |
| O | 4.054672  | 1.800712  | -0.219510 |
| H | 3.399127  | 2.444916  | -0.537295 |
| C | 4.074927  | -0.519978 | 0.378155  |
| H | 5.078962  | -0.399097 | 0.779254  |
| C | -1.159048 | -2.636118 | 0.130200  |
| C | -2.093466 | -1.690719 | 0.866628  |
| H | -1.508452 | -0.769238 | 1.016493  |
| H | -2.255858 | -2.082934 | 1.882324  |
| C | -3.428912 | -1.383629 | 0.171416  |
| H | -3.254061 | -1.276509 | -0.906222 |
| C | -4.140166 | -0.122650 | 0.727140  |
| H | -5.216417 | -0.318870 | 0.827655  |
| C | -3.991785 | 1.159204  | -0.138324 |
| H | -4.564535 | 1.026488  | -1.065899 |
| H | -4.454816 | 1.995608  | 0.404934  |
| H | -3.777242 | 0.086608  | 1.743658  |
| H | -4.086559 | -2.256484 | 0.281651  |
| O | -1.353829 | -2.988892 | -1.021222 |

Sum of electronic and zero-point Energies= -1075.858098

Sum of electronic and thermal Energies= -1075.836713

Sum of electronic and thermal Enthalpies= -1075.835769

Sum of electronic and thermal Free Energies= -1075.908115

## galeon-2-TS (dmf)

|   |           |           |           |
|---|-----------|-----------|-----------|
| C | 0.322710  | 3.062215  | 0.054620  |
| H | 0.430375  | 4.133452  | 0.203625  |
| C | -0.952830 | 2.459561  | 0.163858  |
| C | -0.986339 | 1.099390  | -0.043919 |
| H | -1.908797 | 0.570349  | -0.037982 |
| C | 0.132988  | 0.345283  | -0.263378 |
| H | -0.034492 | -0.705562 | -0.309882 |
| C | 1.384739  | 0.897533  | -0.418130 |
| O | 2.493706  | 0.079197  | -0.737995 |
| C | 1.484083  | 2.304730  | -0.258674 |
| O | 2.730204  | 2.833696  | -0.407420 |
| C | 2.890819  | 4.241736  | -0.257289 |
| H | 2.617764  | 4.573760  | 0.754158  |
| H | 2.295325  | 4.796103  | -0.996077 |
| H | 3.953341  | 4.438523  | -0.427620 |
| C | 1.090292  | -3.568854 | 0.618608  |
| H | 0.607464  | -4.404953 | 1.122922  |
| C | 0.482078  | -2.992705 | -0.512475 |
| C | -1.001747 | -3.206447 | -0.828045 |
| H | -1.251084 | -4.273835 | -0.785028 |
| H | -1.222288 | -2.864393 | -1.846295 |
| C | -1.965029 | -2.444604 | 0.167815  |
| H | -1.410024 | -2.002810 | 1.007795  |
| H | -2.642715 | -3.169044 | 0.644008  |
| C | 1.180502  | -1.951083 | -1.147398 |
| H | 0.756230  | -1.487882 | -2.035005 |
| C | 2.220726  | -1.284246 | -0.484675 |
| C | 2.796900  | -1.846243 | 0.660819  |
| O | 3.799257  | -1.217143 | 1.330314  |
| H | 3.965209  | -0.371580 | 0.879027  |
| C | 2.273004  | -3.051283 | 1.154384  |
| H | 2.730636  | -3.499030 | 2.033828  |
| C | -2.886825 | -1.347534 | -0.413119 |
| C | -3.873767 | -0.620279 | 0.554734  |
| H | -4.078778 | -1.306302 | 1.387471  |

|   |           |           |           |
|---|-----------|-----------|-----------|
| H | -4.801170 | -0.529935 | -0.026586 |
| C | -3.593828 | 0.787151  | 1.220948  |
| H | -4.442069 | 0.922729  | 1.904735  |
| C | -3.503481 | 2.069558  | 0.307031  |
| H | -3.511809 | 1.774012  | -0.750908 |
| C | -2.307790 | 3.060892  | 0.528794  |
| H | -2.508204 | 3.968898  | -0.058390 |
| H | -2.295650 | 3.386282  | 1.581290  |
| H | -4.422577 | 2.650952  | 0.454957  |
| H | -2.713374 | 0.709420  | 1.869329  |
| O | -2.927737 | -1.120472 | -1.609454 |

Sum of electronic and zero-point Energies= -1075.779513

Sum of electronic and thermal Energies= -1075.759143

Sum of electronic and thermal Enthalpies= -1075.758198

Sum of electronic and thermal Free Energies= -1075.826931

#### galeon-2-E1 (dmf)

|   |           |           |           |
|---|-----------|-----------|-----------|
| C | -1.664189 | 2.041657  | -0.492531 |
| H | -2.247656 | 2.142714  | -1.403391 |
| C | -2.323027 | 1.701072  | 0.702538  |
| C | -1.580498 | 1.607911  | 1.885265  |
| H | -2.079763 | 1.386711  | 2.826305  |
| C | -0.184280 | 1.691872  | 1.844177  |
| H | 0.413835  | 1.522176  | 2.737021  |
| C | 0.463849  | 1.897480  | 0.634012  |
| O | 1.844016  | 1.734137  | 0.553533  |
| C | -0.269372 | 2.147027  | -0.544590 |
| O | 0.455889  | 2.397264  | -1.663113 |
| C | -0.246960 | 2.555534  | -2.895487 |
| H | -0.936493 | 3.409921  | -2.857369 |
| H | -0.803854 | 1.645626  | -3.157752 |
| H | 0.520731  | 2.742566  | -3.651559 |
| C | 3.286809  | -2.123120 | -0.083691 |
| H | 3.702113  | -3.119669 | -0.224799 |
| C | 1.915096  | -1.909470 | -0.272913 |
| C | 0.994983  | -3.040270 | -0.705211 |
| H | 1.551624  | -3.981820 | -0.626260 |
| H | 0.741412  | -2.919050 | -1.768506 |
| C | -0.328437 | -3.183364 | 0.076677  |
| H | -0.223829 | -2.863264 | 1.124248  |
| H | -0.611363 | -4.246324 | 0.136924  |
| C | 1.416327  | -0.611521 | -0.074081 |
| H | 0.360522  | -0.417222 | -0.224125 |
| C | 2.259163  | 0.429833  | 0.309049  |
| C | 3.636034  | 0.208104  | 0.488644  |
| O | 4.463995  | 1.224371  | 0.864691  |
| H | 3.919505  | 2.020324  | 0.981485  |
| C | 4.140671  | -1.076217 | 0.287021  |
| H | 5.204450  | -1.248387 | 0.437006  |
| C | -1.544288 | -2.478290 | -0.518876 |
| C | -2.848511 | -2.595961 | 0.268396  |
| H | -2.756118 | -3.399849 | 1.008704  |
| H | -3.646013 | -2.876373 | -0.433662 |
| C | -3.224142 | -1.275331 | 0.991922  |
| H | -3.930599 | -1.514611 | 1.798889  |
| C | -3.842205 | -0.201722 | 0.076511  |
| H | -3.335950 | -0.217437 | -0.896725 |
| C | -3.764745 | 1.242791  | 0.644491  |
| H | -4.355987 | 1.904256  | -0.003550 |
| H | -4.217340 | 1.277327  | 1.645042  |
| H | -4.895349 | -0.454950 | -0.114561 |
| H | -2.325586 | -0.882166 | 1.485077  |
| O | -1.489143 | -1.865594 | -1.573408 |

Sum of electronic and zero-point Energies= -1075.855703

Sum of electronic and thermal Energies= -1075.834380

Sum of electronic and thermal Enthalpies= -1075.833436

Sum of electronic and thermal Free Energies= -1075.905398

#### galeon-2-E2 (dmf)

|   |           |          |          |
|---|-----------|----------|----------|
| C | -1.343477 | 2.126691 | 0.583960 |
|---|-----------|----------|----------|

|   |           |           |           |
|---|-----------|-----------|-----------|
| H | -1.731107 | 2.269635  | 1.588435  |
| C | -2.244347 | 1.881487  | -0.466798 |
| C | -1.749000 | 1.756297  | -1.771175 |
| H | -2.435843 | 1.605089  | -2.601837 |
| C | -0.369784 | 1.708238  | -1.998535 |
| H | 0.029974  | 1.514297  | -2.991500 |
| C | 0.510985  | 1.806882  | -0.929394 |
| O | 1.859836  | 1.505428  | -1.105988 |
| C | 0.039500  | 2.094230  | 0.367667  |
| O | 0.986682  | 2.246412  | 1.328313  |
| C | 0.552626  | 2.466432  | 2.670036  |
| H | -0.037804 | 1.619110  | 3.044505  |
| H | -0.036459 | 3.389714  | 2.753951  |
| H | 1.465693  | 2.563479  | 3.263999  |
| C | 3.040664  | -2.225949 | 0.329647  |
| H | 3.380476  | -3.182368 | 0.723922  |
| C | 1.729817  | -2.100516 | -0.150711 |
| C | 0.760329  | -3.270579 | -0.124278 |
| H | 1.290695  | -4.148716 | 0.263203  |
| H | 0.446717  | -3.518585 | -1.147895 |
| C | -0.514921 | -3.058952 | 0.722139  |
| H | -0.318929 | -2.432621 | 1.605053  |
| H | -0.853875 | -4.023910 | 1.133015  |
| C | 1.330152  | -0.851316 | -0.653901 |
| H | 0.327057  | -0.729180 | -1.048980 |
| C | 2.202461  | 0.233892  | -0.645465 |
| C | 3.511826  | 0.103274  | -0.153860 |
| O | 4.355462  | 1.172421  | -0.132090 |
| H | 3.839248  | 1.949559  | -0.405728 |
| C | 3.926788  | -1.140957 | 0.322483  |
| H | 4.938777  | -1.242881 | 0.708683  |
| C | -1.728049 | -2.491621 | -0.009534 |
| C | -2.964420 | -2.216350 | 0.844834  |
| H | -2.848808 | -2.701728 | 1.821357  |
| H | -3.832748 | -2.669588 | 0.346639  |
| C | -3.207225 | -0.696970 | 1.051120  |
| H | -3.826138 | -0.565529 | 1.949498  |
| C | -3.885510 | 0.005480  | -0.140360 |
| H | -3.495142 | -0.409407 | -1.078021 |
| C | -3.691300 | 1.547565  | -0.171680 |
| H | -4.346118 | 1.964718  | -0.948770 |
| H | -4.004099 | 1.984467  | 0.786803  |
| H | -4.962209 | -0.218882 | -0.122322 |
| H | -2.244423 | -0.219939 | 1.275856  |
| O | -1.725433 | -2.281796 | -1.212365 |

Sum of electronic and zero-point Energies= -1075.856087

Sum of electronic and thermal Energies= -1075.834801

Sum of electronic and thermal Enthalpies= -1075.833856

Sum of electronic and thermal Free Energies= -1075.905688

#### galeon-3-TS (dmf)

|   |           |           |           |
|---|-----------|-----------|-----------|
| C | -0.652788 | 3.039822  | 0.084865  |
| H | -0.871736 | 4.092903  | 0.240619  |
| C | -1.686342 | 2.078180  | 0.162757  |
| C | -1.305747 | 0.775641  | -0.051407 |
| H | -2.047907 | 0.019301  | -0.096961 |
| C | -0.008459 | 0.383508  | -0.233959 |
| H | 0.151860  | -0.670717 | -0.276168 |
| C | 1.016971  | 1.292967  | -0.377208 |
| O | 2.321713  | 0.858797  | -0.703336 |
| C | 0.685543  | 2.664454  | -0.214891 |
| O | 1.718066  | 3.543200  | -0.347968 |
| C | 1.447950  | 4.933269  | -0.190249 |
| H | 2.404285  | 5.440765  | -0.347253 |
| H | 1.078303  | 5.160861  | 0.819483  |
| H | 0.720989  | 5.289568  | -0.933447 |
| C | 2.186261  | -3.102261 | 0.498748  |
| H | 2.019402  | -4.073785 | 0.962293  |
| C | 1.387901  | -2.704845 | -0.590977 |
| C | 0.060184  | -3.400981 | -0.904001 |

|   |           |           |           |
|---|-----------|-----------|-----------|
| H | 0.205142  | -4.487393 | -0.949251 |
| H | -0.315850 | -3.087107 | -1.885451 |
| C | -1.052505 | -3.112506 | 0.181578  |
| H | -0.596391 | -2.775714 | 1.119695  |
| H | -1.547026 | -4.065310 | 0.429541  |
| C | 1.687514  | -1.464712 | -1.178251 |
| H | 1.113087  | -1.127975 | -2.037575 |
| C | 2.482967  | -0.528993 | -0.501038 |
| C | 3.245622  | -0.923687 | 0.604341  |
| O | 4.017928  | -0.035029 | 1.284411  |
| H | 3.889111  | 0.836881  | 0.872661  |
| C | 3.152247  | -2.253154 | 1.044715  |
| H | 3.757967  | -2.567685 | 1.891749  |
| C | -2.230009 | -2.170775 | -0.180266 |
| C | -2.947106 | -1.491042 | 1.012718  |
| H | -2.176742 | -1.113912 | 1.696827  |
| H | -3.417410 | -2.322539 | 1.565787  |
| C | -4.089525 | -0.430252 | 0.799582  |
| H | -4.914289 | -0.959920 | 0.302869  |
| C | -4.019025 | 0.954621  | 0.035831  |
| H | -3.803074 | 0.767087  | -1.024434 |
| C | -3.171394 | 2.200382  | 0.491420  |
| H | -3.612092 | 3.085783  | 0.010920  |
| H | -3.299691 | 2.357584  | 1.574502  |
| H | -5.063590 | 1.295811  | 0.062024  |
| H | -4.451099 | -0.218767 | 1.816501  |
| O | -2.603309 | -2.031160 | -1.330705 |

Sum of electronic and zero-point Energies= -1075.778717

Sum of electronic and thermal Energies= -1075.758259

Sum of electronic and thermal Enthalpies= -1075.757315

Sum of electronic and thermal Free Energies= -1075.826461

#### galeon-3-E1 (dmf)

|   |           |           |           |
|---|-----------|-----------|-----------|
| C | -1.558695 | 1.950614  | -0.514815 |
| H | -2.055447 | 2.083531  | -1.471718 |
| C | -2.326010 | 1.586721  | 0.607212  |
| C | -1.694684 | 1.467225  | 1.849833  |
| H | -2.278007 | 1.227770  | 2.336678  |
| C | -0.299640 | 1.556870  | 1.941463  |
| H | 0.213517  | 1.366387  | 2.881738  |
| C | 0.457031  | 1.796161  | 0.802946  |
| O | 1.839750  | 1.633825  | 0.840893  |
| C | -0.167308 | 2.061875  | -0.434421 |
| O | 0.657154  | 2.337652  | -1.475374 |
| C | 0.070880  | 2.520690  | -2.764175 |
| H | 0.904759  | 2.722884  | -3.442173 |
| H | -0.620224 | 3.374519  | -2.772590 |
| H | -0.458256 | 1.616726  | -3.095124 |
| C | 3.314678  | -2.097585 | -0.298516 |
| H | 3.738825  | -3.060134 | -0.580019 |
| C | 1.923514  | -1.938630 | -0.240307 |
| C | 0.971073  | -3.071641 | -0.590843 |
| H | 1.506243  | -4.023330 | -0.484383 |
| H | 0.679958  | -3.000467 | -1.649560 |
| C | -0.322766 | -3.125570 | 0.246843  |
| H | -0.131077 | -2.880376 | 1.299321  |
| H | -0.703540 | -4.160108 | 0.250045  |
| C | 1.423426  | -0.684690 | 0.137762  |
| H | 0.353736  | -0.528719 | 0.194997  |
| C | 2.274025  | 0.375177  | 0.441329  |
| C | 3.667525  | 0.211372  | 0.371325  |
| O | 4.511481  | 1.241905  | 0.664970  |
| H | 3.968685  | 2.019276  | 0.875798  |
| C | 4.176755  | -1.034391 | 0.000800  |
| H | 5.256338  | -1.161695 | -0.044940 |
| C | -1.500925 | -2.293560 | -0.274474 |
| C | -2.520971 | -1.882520 | 0.778049  |
| H | -2.031236 | -1.125330 | 1.407670  |
| H | -2.659096 | -2.747965 | 1.444497  |
| C | -3.898077 | -1.403719 | 0.283085  |

|   |           |           |           |
|---|-----------|-----------|-----------|
| H | -4.297723 | -2.170158 | -0.396832 |
| C | -4.022914 | -0.041590 | -0.432506 |
| H | -3.365222 | -0.024442 | -1.309702 |
| C | -3.788897 | 1.240058  | 0.414700  |
| H | -4.291242 | 2.072063  | -0.099899 |
| H | -4.280172 | 1.133673  | 1.391797  |
| H | -5.051182 | 0.012241  | -0.818993 |
| H | -4.570534 | -1.396340 | 1.154022  |
| O | -1.620538 | -2.026783 | -1.458285 |

Sum of electronic and zero-point Energies= -1075.855002

Sum of electronic and thermal Energies= -1075.833660

Sum of electronic and thermal Enthalpies= -1075.832716

Sum of electronic and thermal Free Energies= -1075.904599

#### galeon-3-E2 (dmf)

|   |           |           |           |
|---|-----------|-----------|-----------|
| C | -1.462553 | 1.927454  | 0.607644  |
| H | -1.895167 | 2.014752  | 1.600232  |
| C | -2.305474 | 1.652250  | -0.481920 |
| C | -1.754620 | 1.600231  | -1.769468 |
| H | -2.398517 | 1.434121  | -2.630920 |
| C | -0.369557 | 1.664198  | -1.946599 |
| H | 0.078455  | 1.530385  | -2.928921 |
| C | 0.463971  | 1.804251  | -0.844679 |
| O | 1.837024  | 1.608788  | -0.984054 |
| C | -0.073234 | 2.006626  | 0.442985  |
| O | 0.823402  | 2.197553  | 1.443684  |
| C | 0.324233  | 2.359850  | 2.771050  |
| H | 1.204620  | 2.516146  | 3.400684  |
| H | -0.212202 | 1.463512  | 3.111083  |
| H | -0.337230 | 3.233558  | 2.846105  |
| C | 3.220653  | -2.143335 | 0.199502  |
| H | 3.611701  | -3.102047 | 0.536335  |
| C | 1.871648  | -2.029920 | -0.160063 |
| C | 0.905698  | -3.198390 | -0.062770 |
| H | 1.447358  | -4.073328 | 0.316256  |
| H | 0.527142  | -3.468238 | -1.058908 |
| C | -0.313226 | -2.930757 | 0.849374  |
| H | -0.025738 | -2.357486 | 1.739962  |
| H | -0.700527 | -3.891455 | 1.227878  |
| C | 1.408602  | -0.775595 | -0.586902 |
| H | 0.374783  | -0.661774 | -0.892522 |
| C | 2.250398  | 0.332061  | -0.612903 |
| C | 3.602046  | 0.212798  | -0.247415 |
| O | 4.427632  | 1.297069  | -0.264592 |
| H | 3.885057  | 2.073026  | -0.483728 |
| C | 4.080523  | -1.037435 | 0.146654  |
| H | 5.125319  | -1.128395 | 0.436193  |
| C | -1.525785 | -2.274838 | 0.178807  |
| C | -2.432653 | -1.482278 | 1.108120  |
| H | -1.885131 | -0.559619 | 1.351163  |
| H | -2.482341 | -2.033491 | 2.059459  |
| C | -3.864270 | -1.181810 | 0.626653  |
| H | -4.329906 | -2.135553 | 0.337976  |
| C | -4.097991 | -0.187074 | -0.530584 |
| H | -3.563395 | -0.528528 | -1.424722 |
| C | -3.767613 | 1.310773  | -0.273833 |
| H | -4.375364 | 1.906799  | -0.969526 |
| H | -4.084104 | 1.593067  | 0.739822  |
| H | -5.169519 | -0.243948 | -0.771805 |
| H | -4.429346 | -0.826893 | 1.501606  |
| O | -1.754398 | -2.419532 | -1.010740 |

Sum of electronic and zero-point Energies= -1075.854857

Sum of electronic and thermal Energies= -1075.833532

Sum of electronic and thermal Enthalpies= -1075.832588

Sum of electronic and thermal Free Energies= -1075.904599

#### galeon-4-TS (dmf)

|   |           |          |           |
|---|-----------|----------|-----------|
| C | -0.080578 | 3.143428 | -0.249871 |
| H | -0.046111 | 4.209508 | -0.470683 |
| C | -1.287309 | 2.416475 | -0.289682 |

|   |           |           |           |
|---|-----------|-----------|-----------|
| C | -1.172901 | 1.075573  | 0.012968  |
| H | -2.040533 | 0.464598  | 0.024678  |
| C | 0.009630  | 0.454808  | 0.299154  |
| H | -0.055346 | -0.596495 | 0.470390  |
| C | 1.211308  | 1.137972  | 0.332859  |
| O | 2.412679  | 0.449280  | 0.615410  |
| C | 1.159838  | 2.524492  | 0.055311  |
| O | 2.295781  | 3.294828  | -0.005246 |
| C | 2.989866  | 3.460846  | 1.238670  |
| H | 3.839602  | 4.118309  | 1.028588  |
| H | 3.358649  | 2.503961  | 1.628317  |
| H | 2.339776  | 3.934851  | 1.988211  |
| C | 1.448807  | -3.361874 | -0.686784 |
| H | 1.068002  | -4.266245 | -1.159563 |
| C | 0.835377  | -2.879504 | 0.484924  |
| C | -0.556328 | -3.353312 | 0.909902  |
| H | -0.767279 | -3.044824 | 1.940952  |
| H | -0.604811 | -4.448926 | 0.884051  |
| C | -1.700006 | -2.802237 | -0.025015 |
| H | -2.401913 | -3.621481 | -0.248805 |
| H | -1.293813 | -2.506814 | -1.000362 |
| C | 1.402960  | -1.739420 | 1.076121  |
| H | 0.984432  | -1.348153 | 2.000223  |
| C | 2.297429  | -0.935465 | 0.356381  |
| C | 2.878845  | -1.408997 | -0.825667 |
| O | 3.743323  | -0.646468 | -1.546281 |
| H | 3.820700  | 0.213045  | -1.097607 |
| C | 2.502923  | -2.676502 | -1.295945 |
| H | 2.964689  | -3.055284 | -2.205066 |
| C | -2.595705 | -1.656974 | 0.500429  |
| C | -3.509770 | -0.954374 | -0.544194 |
| H | -4.352139 | -1.653287 | -0.669848 |
| H | -2.997121 | -0.952307 | -1.514445 |
| C | -4.086637 | 0.475845  | -0.209010 |
| H | -5.176958 | 0.403047  | -0.296738 |
| C | -3.636866 | 1.684916  | -1.131483 |
| H | -3.172641 | 1.278188  | -2.041538 |
| C | -2.716957 | 2.845137  | -0.600104 |
| H | -2.728275 | 3.642633  | -1.356350 |
| H | -3.175578 | 3.284535  | 0.300419  |
| H | -4.556211 | 2.181195  | -1.468244 |
| H | -3.897777 | 0.696219  | 0.849919  |
| O | -2.635896 | -1.365298 | 1.681081  |

Sum of electronic and zero-point Energies= -1075.784483  
Sum of electronic and thermal Energies= -1075.763665  
Sum of electronic and thermal Enthalpies= -1075.762721  
Sum of electronic and thermal Free Energies= -1075.832991

#### galeon-4-E1 (dmf)

|   |           |           |           |
|---|-----------|-----------|-----------|
| C | -1.697739 | 1.958505  | -0.634629 |
| H | -2.119829 | 2.153467  | -1.618949 |
| C | -2.527104 | 1.605516  | 0.442105  |
| C | -1.936359 | 1.408986  | 1.698145  |
| H | -2.560332 | 1.170461  | 2.557134  |
| C | -0.547193 | 1.451305  | 1.850792  |
| H | -0.082010 | 1.232047  | 2.809401  |
| C | 0.264630  | 1.694607  | 0.747059  |
| O | 1.645074  | 1.547017  | 0.862562  |
| C | -0.307322 | 1.999033  | -0.502589 |
| O | 0.453520  | 2.223307  | -1.619191 |
| C | 1.277166  | 3.397800  | -1.591106 |
| H | 1.736981  | 3.468545  | -2.581694 |
| H | 2.063808  | 3.325309  | -0.830978 |
| H | 0.670124  | 4.294970  | -1.406096 |
| C | 3.329242  | -2.096957 | -0.256359 |
| H | 3.805619  | -3.027210 | -0.561396 |
| C | 1.944809  | -2.063822 | -0.043402 |
| C | 1.088974  | -3.309251 | -0.211617 |
| H | 0.833944  | -3.729463 | 0.772374  |
| H | 1.683532  | -4.072152 | -0.728590 |

|   |           |           |           |
|---|-----------|-----------|-----------|
| C | -0.231262 | -3.094219 | -0.983146 |
| H | -0.573332 | -4.064256 | -1.378383 |
| H | -0.082046 | -2.445081 | -1.854582 |
| C | 1.369155  | -0.841932 | 0.341718  |
| H | 0.304170  | -0.776940 | 0.531512  |
| C | 2.146334  | 0.302646  | 0.491808  |
| C | 3.536117  | 0.258508  | 0.287945  |
| O | 4.305239  | 1.373920  | 0.441329  |
| H | 3.723224  | 2.104216  | 0.707904  |
| C | 4.118664  | -0.952789 | -0.085290 |
| H | 5.192999  | -0.984632 | -0.253660 |
| C | -1.399694 | -2.582130 | -0.135187 |
| C | -2.350384 | -1.616179 | -0.822937 |
| H | -2.610186 | -2.032363 | -1.808864 |
| H | -1.745963 | -0.725011 | -1.051417 |
| C | -3.611959 | -1.233271 | -0.034460 |
| H | -4.315855 | -2.075588 | -0.071005 |
| C | -4.304289 | 0.047495  | -0.566604 |
| H | -4.031662 | 0.202344  | -1.620414 |
| C | -4.004240 | 1.345041  | 0.232626  |
| H | -4.470718 | 2.188972  | -0.295714 |
| H | -4.493067 | 1.275734  | 1.213619  |
| H | -5.394255 | -0.089262 | -0.555869 |
| H | -3.350011 | -1.110385 | 1.023956  |
| O | -1.545134 | -2.938879 | 1.021861  |

Sum of electronic and zero-point Energies= -1075.854361  
Sum of electronic and thermal Energies= -1075.832536  
Sum of electronic and thermal Enthalpies= -1075.831592  
Sum of electronic and thermal Free Energies= -1075.906259

#### galeon-4-E2 (dmf)

|   |           |           |           |
|---|-----------|-----------|-----------|
| C | -1.809786 | 1.647066  | 0.723645  |
| H | -2.285680 | 1.575758  | 1.697046  |
| C | -2.599096 | 1.506790  | -0.430371 |
| C | -1.993257 | 1.643100  | -1.686614 |
| H | -2.592147 | 1.571391  | -2.592559 |
| C | -0.605881 | 1.796885  | -1.786067 |
| H | -0.113093 | 1.833220  | -2.755301 |
| C | 0.175427  | 1.845455  | -0.637422 |
| O | 1.563144  | 1.844558  | -0.741805 |
| C | -0.423413 | 1.825108  | 0.638729  |
| O | 0.416575  | 1.928730  | 1.698477  |
| C | -0.134702 | 1.791053  | 3.008329  |
| H | 0.711055  | 1.881040  | 3.695746  |
| H | -0.609844 | 0.809331  | 3.139125  |
| H | -0.863489 | 2.584421  | 3.222605  |
| C | 3.586461  | -1.718082 | 0.021647  |
| H | 4.151173  | -2.628444 | 0.217176  |
| C | 2.188261  | -1.773871 | -0.078051 |
| C | 1.437788  | -3.082185 | 0.128157  |
| H | 1.318705  | -3.269989 | 1.205520  |
| H | 2.054657  | -3.904876 | -0.255812 |
| C | 0.041681  | -3.163344 | -0.517022 |
| H | -0.251759 | -4.223086 | -0.587534 |
| H | 0.052132  | -2.785656 | -1.547177 |
| C | 1.505128  | -0.578860 | -0.340776 |
| H | 0.427242  | -0.576103 | -0.437835 |
| C | 2.183030  | 0.629678  | -0.477280 |
| C | 3.581464  | 0.679189  | -0.367880 |
| O | 4.256632  | 1.856876  | -0.501054 |
| H | 3.600074  | 2.560919  | -0.630820 |
| C | 4.274952  | -0.507923 | -0.121898 |
| H | 5.359416  | -0.469518 | -0.042578 |
| C | -1.086981 | -2.495831 | 0.276354  |
| C | -2.215756 | -1.896837 | -0.550153 |
| H | -2.515815 | -2.639859 | -1.305582 |
| H | -1.762148 | -1.081875 | -1.134401 |
| C | -3.434434 | -1.389227 | 0.235850  |
| H | -4.037752 | -2.254646 | 0.541788  |
| C | -4.317256 | -0.401871 | -0.567925 |

|                                                           |           |           |           |
|-----------------------------------------------------------|-----------|-----------|-----------|
| H                                                         | -4.202576 | -0.598927 | -1.643668 |
| C                                                         | -4.053520 | 1.105418  | -0.296129 |
| H                                                         | -4.674816 | 1.691078  | -0.988385 |
| H                                                         | -4.398251 | 1.342815  | 0.719292  |
| H                                                         | -5.376106 | -0.585807 | -0.339342 |
| H                                                         | -3.092642 | -0.920583 | 1.167053  |
| O                                                         | -1.073725 | -2.465273 | 1.494996  |
| Sum of electronic and zero-point Energies= -1075.857842   |           |           |           |
| Sum of electronic and thermal Energies= -1075.836463      |           |           |           |
| Sum of electronic and thermal Enthalpies= -1075.835518    |           |           |           |
| Sum of electronic and thermal Free Energies= -1075.907550 |           |           |           |

galeon-5-TS (dmf)

|   |           |           |           |
|---|-----------|-----------|-----------|
| C | -3.084631 | 0.629031  | -0.003052 |
| H | -4.136922 | 0.843326  | 0.164572  |
| C | -2.137613 | 1.681791  | 0.001023  |
| C | -0.833548 | 1.306286  | -0.218142 |
| H | -0.065615 | 2.036060  | -0.288085 |
| C | -0.433115 | 0.002316  | -0.313424 |
| H | 0.621707  | -0.146275 | -0.313868 |
| C | -1.325056 | -1.043403 | -0.385106 |
| O | -0.857485 | -2.359080 | -0.619582 |
| C | -2.699585 | -0.720515 | -0.231970 |
| O | -3.568995 | -1.768183 | -0.293343 |
| C | -4.957734 | -1.505663 | -0.114497 |
| H | -5.341774 | -0.822371 | -0.884956 |
| H | -5.164675 | -1.085951 | 0.880080  |
| H | -5.457410 | -2.474317 | -0.208577 |
| C | 3.144762  | -1.851912 | 0.328302  |
| H | 4.123035  | -1.571924 | 0.716132  |
| C | 2.638792  | -1.218796 | -0.821803 |
| C | 3.234941  | 0.060055  | -1.412020 |
| H | 2.638964  | 0.342935  | -2.288434 |
| H | 4.255591  | -0.117715 | -1.780120 |
| C | 3.382855  | 1.328934  | -0.475516 |
| H | 3.782928  | 2.123266  | -1.119043 |
| H | 4.157435  | 1.100110  | 0.268544  |
| C | 1.392192  | -1.662063 | -1.293976 |
| H | 0.961814  | -1.193726 | -2.175938 |
| C | 0.548515  | -2.436262 | -0.485946 |
| C | 1.051399  | -3.033353 | 0.675334  |
| O | 0.256792  | -3.772227 | 1.494394  |
| H | -0.642520 | -3.751997 | 1.124145  |
| C | 2.391157  | -2.798782 | 1.026673  |
| H | 2.785731  | -3.274631 | 1.921783  |
| C | 2.212201  | 1.906565  | 0.365441  |
| C | 1.593972  | 3.271433  | -0.042505 |
| H | 1.398049  | 3.254352  | -1.125003 |
| H | 2.424930  | 3.986964  | 0.066968  |
| C | 0.348515  | 3.787825  | 0.777449  |
| H | 0.193049  | 3.105084  | 1.621633  |
| C | -1.013765 | 4.029262  | 0.000990  |
| H | -1.313339 | 5.068769  | 0.186663  |
| C | -2.291412 | 3.167299  | 0.315553  |
| H | -3.131591 | 3.612227  | -0.238127 |
| H | -2.548222 | 3.283620  | 1.380779  |
| H | -0.823054 | 3.970960  | -1.080625 |
| H | 0.638184  | 4.747157  | 1.222883  |
| O | 1.878020  | 1.344962  | 1.392498  |

Sum of electronic and zero-point Energies= -1075.775744  
Sum of electronic and thermal Energies= -1075.755416  
Sum of electronic and thermal Enthalpies= -1075.754471  
Sum of electronic and thermal Free Energies= -1075.822849

galeon-5-E1 (dmf)

|   |          |          |           |
|---|----------|----------|-----------|
| C | 2.130684 | 1.810053 | -0.275497 |
| H | 2.799559 | 2.034316 | -1.101853 |
| C | 2.606137 | 1.030649 | 0.794350  |
| C | 1.757266 | 0.778581 | 1.878782  |
| H | 2.121592 | 0.217898 | 2.736767  |

|   |           |           |           |
|---|-----------|-----------|-----------|
| C | 0.417686  | 1.174417  | 1.829086  |
| H | -0.273766 | 0.906872  | 2.625474  |
| C | -0.071773 | 1.843825  | 0.714828  |
| O | -1.450461 | 2.016082  | 0.562834  |
| C | 0.793832  | 2.229343  | -0.329410 |
| O | 0.234249  | 2.925052  | -1.351285 |
| C | 1.068656  | 3.287873  | -2.450889 |
| H | 1.467655  | 2.401195  | -2.962348 |
| H | 1.899947  | 3.930021  | -2.129193 |
| H | 0.425615  | 3.844480  | -3.138450 |
| C | -3.444458 | -1.504916 | -0.467281 |
| H | -3.980702 | -2.425700 | -0.691721 |
| C | -2.129097 | -1.332221 | -0.922761 |
| C | -1.368338 | -2.403177 | -1.681893 |
| H | -0.673928 | -1.929750 | -2.388106 |
| H | -2.067018 | -2.999999 | -2.282662 |
| C | -0.586204 | -3.397941 | -0.781447 |
| H | -0.124070 | -4.150719 | -1.439944 |
| H | -1.281942 | -3.923415 | -0.116460 |
| C | -1.484404 | -0.127477 | -0.618282 |
| H | -0.477151 | 0.040651  | -0.981432 |
| C | -2.095986 | 0.848745  | 0.162214  |
| C | -3.412839 | 0.672289  | 0.614587  |
| O | -4.027497 | 1.620185  | 1.376324  |
| H | -3.379469 | 2.323414  | 1.549829  |
| C | -4.083823 | -0.508301 | 0.279843  |
| H | -5.103418 | -0.644190 | 0.634241  |
| C | 0.534908  | -2.844855 | 0.101885  |
| C | 1.669024  | -2.056248 | -0.551896 |
| H | 1.292124  | -1.033350 | -0.690713 |
| H | 1.844825  | -2.440986 | -1.566444 |
| C | 2.974924  | -2.023605 | 0.264145  |
| H | 2.722227  | -1.913261 | 1.325211  |
| C | 3.971779  | -0.916618 | -0.164097 |
| H | 4.994455  | -1.317118 | -0.130396 |
| C | 3.964400  | 0.368004  | 0.711527  |
| H | 4.706519  | 1.066260  | 0.299460  |
| H | 4.300186  | 0.103526  | 1.723479  |
| H | 3.792072  | -0.637295 | -1.212531 |
| C | 3.460735  | -3.004946 | 0.172790  |
| O | 0.526173  | -3.063624 | 1.301906  |

Sum of electronic and zero-point Energies= -1075.852422  
Sum of electronic and thermal Energies= -1075.830983  
Sum of electronic and thermal Enthalpies= -1075.830038  
Sum of electronic and thermal Free Energies= -1075.902479

galeon-5-E2 (dmf)

|   |           |           |           |
|---|-----------|-----------|-----------|
| C | 1.691278  | 1.623029  | 0.740561  |
| H | 2.082606  | 1.456612  | 1.739681  |
| C | 2.563057  | 1.525192  | -0.357903 |
| C | 2.071559  | 1.800515  | -1.640556 |
| H | 2.740093  | 1.768718  | -2.498935 |
| C | 0.704027  | 2.027487  | -1.838493 |
| H | 0.295118  | 2.155748  | -2.838435 |
| C | -0.167419 | 1.996858  | -0.757023 |
| O | -1.548399 | 1.968285  | -0.964342 |
| C | 0.324507  | 1.859065  | 0.557350  |
| O | -0.601811 | 1.906129  | 1.548732  |
| C | -0.184581 | 1.567541  | 2.872282  |
| H | 0.553560  | 2.284285  | 3.256778  |
| H | 0.232372  | 0.552218  | 2.905967  |
| H | -1.087481 | 1.613830  | 3.487584  |
| C | -3.158084 | -1.799046 | -0.155638 |
| H | -3.588166 | -2.767255 | 0.096450  |
| C | -1.908817 | -1.733015 | -0.791257 |
| C | -1.065121 | -2.959287 | -1.083999 |
| H | -0.415175 | -2.759186 | -1.945482 |
| H | -1.709944 | -3.802333 | -1.365390 |
| C | -0.199628 | -3.436414 | 0.114625  |
| H | 0.346454  | -4.338545 | -0.204105 |

|   |           |           |           |
|---|-----------|-----------|-----------|
| H | -0.848376 | -3.720174 | 0.951805  |
| C | -1.403376 | -0.466486 | -1.109606 |
| H | -0.453333 | -0.383396 | -1.626650 |
| C | -2.077837 | 0.694407  | -0.745866 |
| C | -3.317877 | 0.625173  | -0.095220 |
| O | -3.973996 | 1.757051  | 0.279856  |
| H | -3.368066 | 2.502160  | 0.127111  |
| C | -3.862216 | -0.635022 | 0.174474  |
| H | -4.825066 | -0.689493 | 0.678114  |
| C | 0.841365  | -2.464382 | 0.673864  |
| C | 1.903858  | -1.900265 | -0.267804 |
| H | 1.434676  | -1.050434 | -0.783121 |
| H | 2.121923  | -2.634336 | -1.056110 |
| C | 3.195962  | -1.440369 | 0.433638  |
| H | 2.928068  | -0.936889 | 1.369843  |
| C | 4.104357  | -0.522833 | -0.423578 |
| H | 5.155768  | -0.784121 | -0.239548 |
| C | 3.969031  | 1.002589  | -0.155319 |
| H | 4.667498  | 1.528175  | -0.821389 |
| H | 4.292966  | 1.206839  | 0.874390  |
| C | 3.928013  | -0.715673 | -1.491872 |
| H | 3.761503  | -2.335668 | 0.727193  |
| O | 0.825547  | -2.173904 | 1.859370  |

Sum of electronic and zero-point Energies= -1075.853850

Sum of electronic and thermal Energies= -1075.832509

Sum of electronic and thermal Enthalpies= -1075.831564

Sum of electronic and thermal Free Energies= -1075.903675

#### galeon-6-TS (dmf)

|   |           |           |           |
|---|-----------|-----------|-----------|
| C | 0.186027  | 3.187852  | -0.080758 |
| H | 0.169636  | 4.267853  | 0.058465  |
| C | 1.374444  | 2.445597  | 0.030223  |
| C | 1.235885  | 1.086009  | -0.163249 |
| H | 2.095418  | 0.463322  | -0.149426 |
| C | 0.036760  | 0.472476  | -0.380561 |
| H | 0.072849  | -0.592591 | -0.440177 |
| C | -1.148819 | 1.173656  | -0.524485 |
| O | -2.340508 | 0.471688  | -0.834610 |
| C | -1.067495 | 2.581056  | -0.377235 |
| O | -2.116441 | 3.445784  | -0.537545 |
| C | -3.376381 | 3.102924  | 0.048947  |
| H | -3.913392 | 2.357764  | -0.549775 |
| H | -3.958826 | 4.029814  | 0.070719  |
| H | -3.248327 | 2.739421  | 1.078225  |
| C | -1.531030 | -3.298784 | 0.693323  |
| H | -1.201827 | -4.190732 | 1.224793  |
| C | -0.830875 | -2.873441 | -0.451342 |
| C | 0.570414  | -3.399191 | -0.766393 |
| H | 0.855929  | -3.141300 | -1.793289 |
| H | 0.585076  | -4.493594 | -0.692246 |
| C | 1.669339  | -2.840508 | 0.216206  |
| H | 2.348624  | -3.664393 | 0.487891  |
| H | 1.217390  | -2.521879 | 1.163286  |
| C | -1.333241 | -1.747293 | -1.122551 |
| H | -0.844614 | -1.401878 | -2.030334 |
| C | -2.260410 | -0.898790 | -0.499593 |
| C | -2.933731 | -1.320951 | 0.653377  |
| O | -3.845068 | -0.531578 | 1.282098  |
| H | -3.910407 | 0.302578  | 0.788097  |
| C | -2.611836 | -2.573423 | 1.198589  |
| H | -3.146047 | -2.909348 | 2.084627  |
| C | 2.609894  | -1.724064 | -0.293276 |
| C | 3.400834  | -0.931780 | 0.785206  |
| H | 4.170097  | -1.640480 | 1.131539  |
| H | 2.746055  | -0.783316 | 1.653291  |
| C | 4.099542  | 0.418356  | 0.366498  |
| H | 5.168266  | 0.299011  | 0.580327  |
| C | 3.640085  | 1.748589  | 1.095940  |
| H | 3.105374  | 1.476796  | 2.017591  |
| C | 2.802513  | 2.861359  | 0.362624  |

|   |          |           |           |
|---|----------|-----------|-----------|
| H | 2.807701 | 3.751791  | 1.006611  |
| H | 3.328644 | 3.157641  | -0.559223 |
| H | 4.556914 | 2.254099  | 1.426297  |
| H | 4.037138 | 0.528733  | -0.724277 |
| O | 2.772870 | -1.524295 | -1.482687 |

Sum of electronic and zero-point Energies= -1075.783922

Sum of electronic and thermal Energies= -1075.763311

Sum of electronic and thermal Enthalpies= -1075.762367

Sum of electronic and thermal Free Energies= -1075.831657

#### galeon-6-E1 (dmf)

|   |           |           |           |
|---|-----------|-----------|-----------|
| C | 1.751445  | 1.793555  | -0.780042 |
| H | 2.201259  | 1.818997  | -1.770510 |
| C | 2.549613  | 1.630068  | 0.357901  |
| C | 1.928188  | 1.662254  | 1.618340  |
| H | 2.527181  | 1.580195  | 2.523440  |
| C | 0.538243  | 1.728235  | 1.717406  |
| H | 0.041760  | 1.678870  | 2.684249  |
| C | -0.248297 | 1.789842  | 0.565671  |
| O | -1.630760 | 1.662014  | 0.682097  |
| C | 0.354877  | 1.885887  | -0.699973 |
| O | -0.332081 | 1.962247  | -1.875338 |
| C | -1.435243 | 2.876157  | -1.965256 |
| H | -2.362208 | 2.440204  | -1.577802 |
| H | -1.557346 | 3.090238  | -3.032036 |
| H | -1.217793 | 3.810173  | -1.431282 |
| C | -3.359429 | -2.072298 | 0.025104  |
| H | -3.850424 | -3.030991 | -0.134400 |
| C | -1.959346 | -1.997469 | 0.006106  |
| C | -1.114744 | -3.232051 | -0.272552 |
| H | -0.981276 | -3.352205 | -1.357968 |
| H | -1.669650 | -4.116434 | 0.064878  |
| C | 0.284818  | -3.241593 | 0.372112  |
| H | 0.644545  | -4.281950 | 0.418642  |
| H | 0.251670  | -2.886299 | 1.409512  |
| C | -1.367203 | -0.744850 | 0.226531  |
| H | -0.289326 | -0.641910 | 0.226612  |
| C | -2.143638 | 0.389606  | 0.447924  |
| C | -3.545559 | 0.307841  | 0.457407  |
| O | -4.313472 | 1.414668  | 0.672314  |
| H | -3.717702 | 2.168815  | 0.812416  |
| C | -4.144414 | -0.935084 | 0.246726  |
| H | -5.230314 | -0.999337 | 0.261836  |
| C | 1.364832  | -2.487683 | -0.410409 |
| C | 2.438572  | -1.807135 | 0.424239  |
| H | 2.805182  | -2.534691 | 1.165439  |
| H | 1.916409  | -1.046377 | 1.023955  |
| C | 3.604373  | -1.181796 | -0.356348 |
| H | 4.274080  | -1.986466 | -0.688566 |
| C | 4.408423  | -0.144230 | 0.466419  |
| H | 4.307979  | -0.366518 | 1.538624  |
| C | 4.029458  | 1.341190  | 0.215943  |
| H | 4.606249  | 1.963870  | 0.914636  |
| H | 4.350809  | 1.618396  | -0.796916 |
| H | 5.478637  | -0.242192 | 0.238129  |
| H | 3.216884  | -0.720049 | -1.273220 |
| O | 1.356758  | -2.454805 | -1.628968 |

Sum of electronic and zero-point Energies= -1075.854148

Sum of electronic and thermal Energies= -1075.832419

Sum of electronic and thermal Enthalpies= -1075.831475

Sum of electronic and thermal Free Energies= -1075.905634

#### galeon-6-E2 (dmf)

|   |          |          |           |
|---|----------|----------|-----------|
| C | 1.684144 | 2.006487 | 0.638154  |
| H | 2.107275 | 2.226729 | 1.616686  |
| C | 2.512680 | 1.639948 | -0.431931 |
| C | 1.922506 | 1.420930 | -1.685640 |
| H | 2.546066 | 1.175585 | -2.542844 |
| C | 0.534103 | 1.453366 | -1.832129 |
| H | 0.065448 | 1.215464 | -2.784677 |

|   |           |           |           |
|---|-----------|-----------|-----------|
| C | -0.280338 | 1.709149  | -0.731354 |
| O | -1.658447 | 1.536335  | -0.850285 |
| C | 0.289925  | 2.044849  | 0.511766  |
| O | -0.431234 | 2.317260  | 1.637132  |
| C | -1.544410 | 3.217629  | 1.537440  |
| H | -1.338484 | 4.024253  | 0.822309  |
| H | -1.672980 | 3.645934  | 2.537005  |
| H | -2.464842 | 2.698422  | 1.250002  |
| C | -3.287155 | -2.141592 | 0.238700  |
| H | -3.750068 | -3.080950 | 0.536379  |
| C | -1.902801 | -2.086225 | 0.030340  |
| C | -1.029897 | -3.320075 | 0.195403  |
| H | -0.764113 | -3.730844 | -0.789713 |
| H | -1.615847 | -4.094367 | 0.705156  |
| C | 0.283299  | -3.089937 | 0.974403  |
| H | 0.636461  | -4.056548 | 1.368210  |
| H | 0.121094  | -2.445610 | 1.847085  |
| C | -1.343556 | -0.853585 | -0.345542 |
| H | -0.279012 | -0.771097 | -0.530711 |
| C | -2.138120 | 0.279391  | -0.492518 |
| C | -3.527154 | 0.213000  | -0.289980 |
| O | -4.310049 | 1.321965  | -0.430678 |
| H | -3.739035 | 2.056126  | -0.710830 |

|   |           |           |           |
|---|-----------|-----------|-----------|
| C | -4.093479 | -1.008409 | 0.073496  |
| H | -5.167449 | -1.057227 | 0.239870  |
| C | 1.448364  | -2.559712 | 0.133278  |
| C | 2.380417  | -1.579672 | 0.826303  |
| H | 2.637126  | -1.989279 | 1.815752  |
| H | 1.762544  | -0.695575 | 1.046660  |
| C | 3.643460  | -1.183135 | 0.047289  |
| H | 4.358426  | -2.015598 | 0.094201  |
| C | 4.313297  | 0.109139  | 0.579349  |
| H | 4.035979  | 0.260787  | 1.632437  |
| C | 3.993452  | 1.400012  | -0.222432 |
| H | 4.448057  | 2.251908  | 0.303370  |
| H | 4.482832  | 1.335237  | -1.203506 |
| H | 5.405408  | -0.009800 | 0.570745  |
| H | 3.389381  | -1.068617 | -1.013980 |
| O | 1.605143  | -2.913596 | -1.023165 |

Sum of electronic and zero-point Energies= -1075.854171  
Sum of electronic and thermal Energies= -1075.832554  
Sum of electronic and thermal Enthalpies= -1075.831610  
Sum of electronic and thermal Free Energies= -1075.904393
